# Supplementary material for: Global analysis of gene expression reveals mRNA superinduction is required for the inducible immune response to a bacterial pathogen
Source: eLife journal article supplement (doi:10.7554/elife.22707), 2017-04-06
Supplement: supp [file elife-22707-supp-v1.zip]

Archive with 8 entries (8 files):
- elife_poa_e22707_Figure_1_Supplement_2.pdf
- elife_poa_e22707_Figure_4_Source_Data.xlsx
- elife_poa_e22707_Figure_6_Supplement_1.pdf
- elife_poa_e22707_Figure_2_Source_Data.xlsx
- elife_poa_e22707_Figure_3_Source_Data.xlsx
- elife_poa_e22707_Figure_1_Supplement_1.pdf
- elife_poa_e22707_Figure_7_Source_Data.xlsx
- elife_poa_e22707_Figure_7_Supplement_1.pdf
