# Supplementary material for: Global analysis of gene expression reveals mRNA superinduction is required for the inducible immune response to a bacterial pathogen
Source: eLife journal article supplement (doi:10.7554/elife.22707), 2017-04-06
Supplement: supp [file elife-22707-supp-v1.zip]

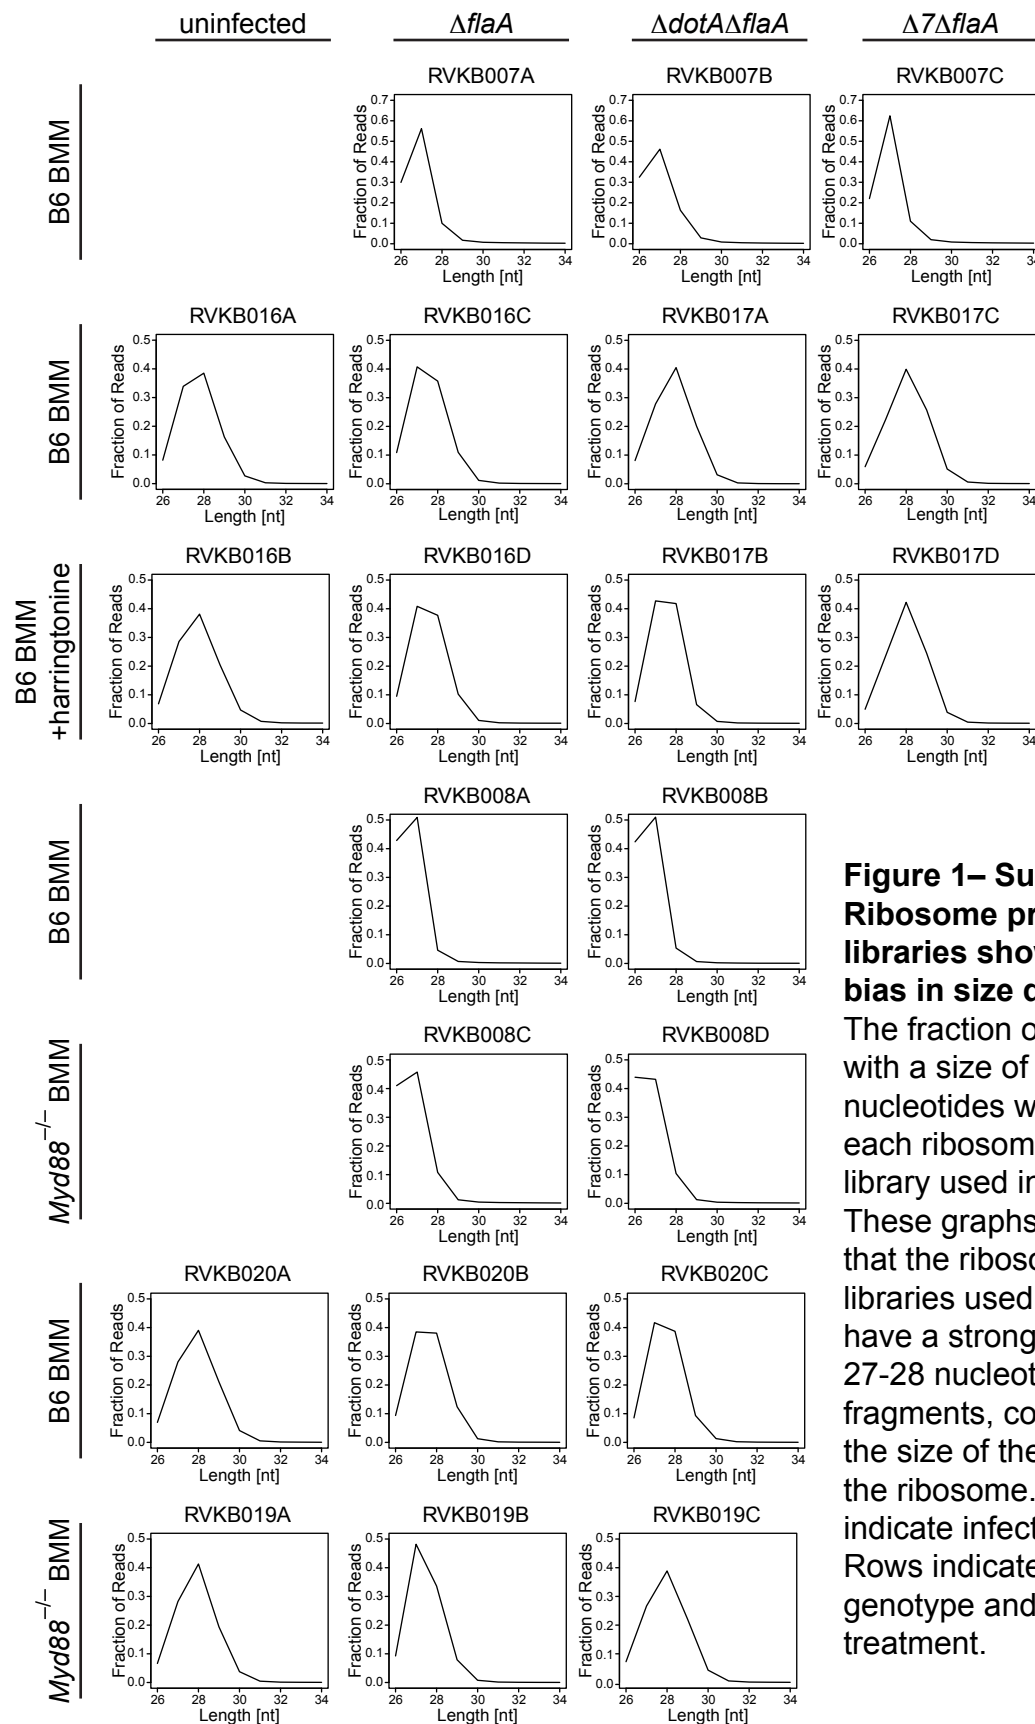

**Figure 1– Supplement 2. Ribosome profiling libraries show a strong bias in size distribution.**

The fraction of total reads with a size of 26-34 nucleotides was plotted for each ribosome profiling library used in this study. These graphs clearly show that the ribosome profiling libraries used in this study have a strong bias for 27-28 nucleotide fragments, consistent with the size of the footprint of the ribosome. Columns indicate infection condition. Rows indicate BMM genotype and/or drug treatment.
