# Supplementary material for: Global analysis of gene expression reveals mRNA superinduction is required for the inducible immune response to a bacterial pathogen
Source: eLife journal article supplement (doi:10.7554/elife.22707), 2017-04-06
Supplement: supp [file elife-22707-supp-v1.zip › elife_poa_e22707_Figure_1_Supplement_1.pdf]

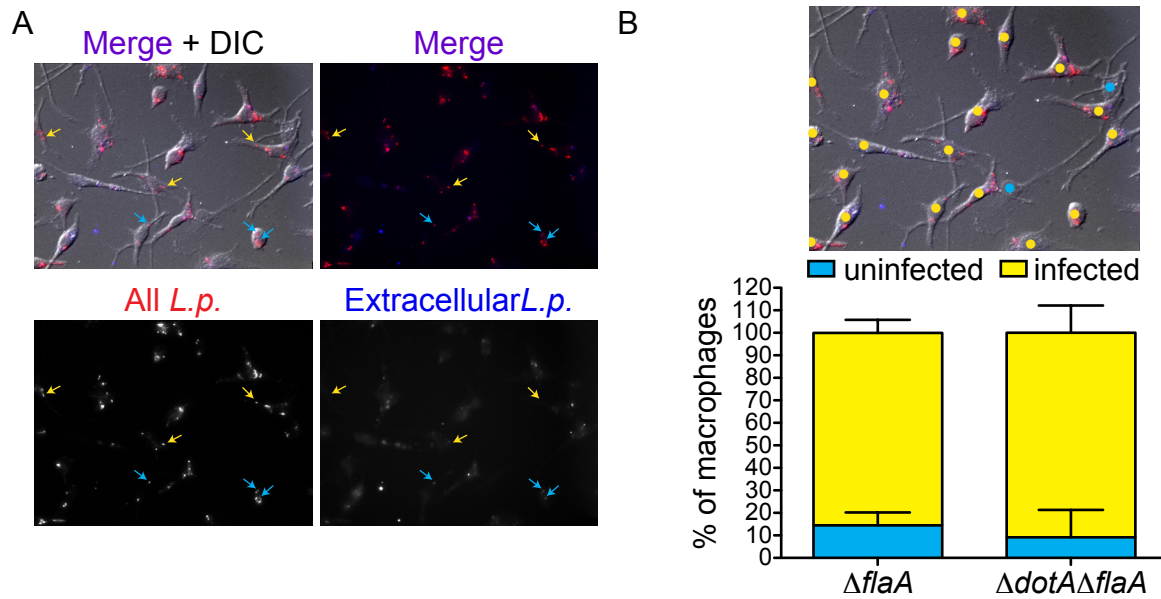

**Figure 1– Supplement 1. Quantification of *L. pneumophila* infectivity. (A-B)  $\Delta flaA$  or  $\Delta dotA \Delta flaA$  *L. pneumophila* infected BMMs were stained to mark extracellular (blue) and all bacteria (red). (A) Representative image of  $\Delta flaA$  *L. pneumophila* infected BMMs showing extracellular (blue and red stain, blue arrow) and intracellular (red stain only, yellow arrow) bacteria. (B) Individual BMMs (n=1,375) were analyzed for the presence of at least one intracellular  $\Delta flaA$  or  $\Delta dotA \Delta flaA$  *L. pneumophila* bacterium. Image is the same as in A with yellow circles marking infected cells and blue circles marking uninfected cells. The average combined infectivity in these conditions is ~90%. Data are combined from two independent experiments. See methods for more details on counting.**
