# Supplementary material for: Global analysis of gene expression reveals mRNA superinduction is required for the inducible immune response to a bacterial pathogen
Source: eLife journal article supplement (doi:10.7554/elife.22707), 2017-04-06
Supplement: supp [file elife-22707-supp-v1.zip › elife_poa_e22707_Figure_2_Source_Data.xlsx]

## Sheet: T4SS-Induction (1A)
		Raw Read Counts Ribosome Reads											Raw Read Counts mRNA Reads															Normalized Ribosome Reads											Normalized mRNA Reads
		B6-flaA-ribo	B6-flaA-ribo	flaA_ribo	flaA_ribo		B6-dotflaA-ribo	B6-dotflaA-ribo	dotflaA_ribo	dotflaA_ribo			B6-flaA-mRNA	B6-flaA-mRNA	flaA_mRNA	flaA_mRNA		B6-dotflaA-mRNA	B6-dotflaA-mRNA	dotflaA_mRNA	dotflaA-mRNA						normalized read = read count / sum mitochondrial reads	B6-flaA-ribo	B6-flaA-ribo	flaA_ribo	flaA_ribo		B6-dotflaA-ribo	B6-dotflaA-ribo	dotflaA_ribo	dotflaA_ribo			B6-flaA-mRNA	B6-flaA-mRNA	flaA_mRNA	flaA_mRNA		B6-dotflaA-mRNA	B6-dotflaA-mRNA	dotflaA_mRNA	dotflaA-mRNA
Gene	Length	RVKB008A	RVKB020B	RVKB007A	RVKB016C	flaA_ribo_avg	RVKB008B	RVKB020C	RVKB007B	RKVB017A	dotflaA_ribo_avg		RVKB005B	RVKB022B	RVKB010B	RVKB018B	flaA_mRNA_avg	RVKB005C	RVKB022C	RVKB010C	RVKB018C	dotflaA_mRNA_avg						RVKB008A	RVKB020B	RVKB007A	RVKB016C	flaA_ribo_avg	RVKB008B	RVKB020C	RVKB007B	RKVB017A	dotflaA_ribo_avg		RVKB005B	RVKB022B	RVKB010B	RVKB018B	flaA_mRNA_avg	RVKB005C	RVKB022C	RVKB010C	RVKB018C	dotflaA_mRNA_avg
NM_001145034	104	252	727	174	115	317	0	16	3	6	6.25		1574	1010	1094	355	1008.25	2	4	14	1	5.25						0.0450241	0.0771189	0.0234628	0.0162774	0.0404708	0	0.000535368	0.00059988	0.000416609	0.000387964		0.0022783	0.0012797	0.00229048	0.000462591	0.00157777	2.25318e-06	3.15314e-06	3.21985e-05	1.06738e-06	9.66805e-06
NM_015743	608	475	892	112	100	394.75	8	15	1	4	7		1441	1983	165	476	1016.25	24	6	6	1	9.25						0.0848669	0.0946218	0.0151025	0.0141543	0.0521864	0.000823299	0.000501907	0.00019996	0.000277739	0.000450726		0.00208579	0.00251252	0.000345456	0.000620263	0.00139101	2.70382e-05	4.72972e-06	1.37994e-05	1.06738e-06	1.16587e-05
NM_008380	405	300	277	157	80	203.5	6	41	75	10	33		526	177	85	70	214.5	14	12	30	5	15.25						0.0536001	0.0293837	0.0211704	0.0113234	0.0288694	0.000617475	0.00137188	0.014997	0.000694348	0.00442018		0.000761364	0.000224265	0.000177962	9.12151e-05	0.000313702	1.57723e-05	9.45943e-06	6.89968e-05	5.33691e-06	2.48913e-05
NM_181444	337	133	310	173	40	164	11	19	17	2	12.25		180	336	153	64	183.25	23	14	22	13	18						0.0237627	0.0328843	0.0233279	0.00566171	0.0214092	0.00113204	0.000635749	0.00339932	0.00013887	0.00132649		0.000260543	0.000425723	0.000320332	8.33966e-05	0.000272499	2.59116e-05	1.1036e-05	5.05976e-05	1.3876e-05	2.53553e-05
NM_009895	238	95	799	260	316	367.5	4	31	15	19	17.25		425	984	208	428	511.25	4	22	35	13	18.5						0.0169734	0.0847566	0.0350593	0.0447275	0.0453792	0.00041165	0.00103727	0.0029994	0.00131926	0.0014419		0.000615171	0.00124676	0.000435484	0.000557715	0.000713782	4.50637e-06	1.73423e-05	8.04962e-05	1.3876e-05	2.90552e-05
NM_009627	165	170	1641	94	191	524	9	18	25	8	15		882	4488	358	579	1576.75	7	16	36	21	20						0.0303734	0.174074	0.0126753	0.0270347	0.0610395	0.000926212	0.000602289	0.004999	0.000555478	0.00177074		0.00127666	0.00568644	0.000749536	0.000754479	0.00211678	7.88614e-06	1.26126e-05	8.27961e-05	2.2415e-05	3.14275e-05
NM_011345	600	3794	4036	1622	1844	2824	19	32	8	53	28		25640	11331	6279	6792	12510.5	36	37	13	19	26.25						0.677863	0.428132	0.218716	0.261005	0.396429	0.00195534	0.00107074	0.00159968	0.00368004	0.00207645		0.0371129	0.0143567	0.0131462	0.00885047	0.0183666	4.05573e-05	2.91666e-05	2.98986e-05	2.02803e-05	2.99757e-05
NM_031252	177	365	497	135	95	273	0	4	3	2	2.25		6424	5895	2130	1903	4088	11	33	65	9	29.5						0.0652135	0.0527209	0.0182039	0.0134466	0.0373962	0	0.000133842	0.00059988	0.00013887	0.000218148		0.00929849	0.00746915	0.00445953	0.00247975	0.00592673	1.23925e-05	2.60134e-05	0.000149493	9.60644e-06	4.93763e-05
NM_008827	139	71	246	64	35	104	8	21	16	0	11.25		298	1005	267	213	445.75	4	85	32	6	31.75						0.0126854	0.0260953	0.00862999	0.004954	0.0130912	0.000823299	0.00070267	0.00319936	0	0.00118133		0.000431343	0.00127337	0.000559011	0.000277554	0.000635319	4.50637e-06	6.70043e-05	7.35965e-05	6.40429e-06	3.78779e-05
NM_175260	1957	205	228	178	240	212.75	540	572	146	339	399.25		271	56	26	72	106.25	57	34	15	75	45.25						0.0366268	0.0241858	0.0240022	0.0339703	0.0296963	0.0555727	0.0191394	0.0291942	0.0235384	0.0318612		0.000392262	7.09538e-05	5.44356e-05	9.38212e-05	0.000152868	6.42157e-05	2.68017e-05	3.44984e-05	8.00536e-05	5.13924e-05
NM_010276	276	933	1226	587	354	775	7	26	12	6	12.75		6314	3272	3380	1189	3538.75	64	14	107	11	49						0.166696	0.130052	0.0791532	0.0501062	0.106502	0.000720387	0.000869973	0.00239952	0.000416609	0.00110162		0.00913927	0.00414573	0.00707662	0.00154935	0.00547774	7.21019e-05	1.1036e-05	0.000246088	1.17412e-05	8.52419e-05
NM_009137	73	92	1156	54	162	366	35	79	12	18	36		195	1209	95	297	449	64	54	44	42	51						0.0164374	0.122626	0.00728155	0.0229299	0.0423188	0.00360193	0.00264338	0.00239952	0.00124983	0.00247366		0.000282255	0.00153184	0.000198899	0.000387013	0.000600002	7.21019e-05	4.25674e-05	0.000101195	4.483e-05	6.51737e-05
NM_007913	514	374	170	102	158	201	26	133	17	88	66		141	394	32	218	196.25	4	86	2	135	56.75						0.0668215	0.0180333	0.013754	0.0223638	0.0302432	0.00267572	0.00445024	0.00339932	0.00611026	0.00415889		0.000204092	0.000499211	6.69976e-05	0.00028407	0.000263593	4.50637e-06	6.77926e-05	4.59978e-06	0.000144097	5.52488e-05
NM_053217	447	128	49	125	226	132	99	184	55	105	110.75		286	31	109	271	174.25	107	72	24	56	64.75						0.0228694	0.00519784	0.0168554	0.0319887	0.0192278	0.0101883	0.00615673	0.0109978	0.00729065	0.00865838		0.000413974	3.9278e-05	0.000228211	0.000353133	0.000258649	0.000120545	5.67566e-05	5.51974e-05	5.97734e-05	7.30682e-05
NM_001081212	1302	237	428	195	125	246.25	10	40	26	14	22.5		1534	2058	566	1329	1371.75	71	61	54	78	66						0.0423441	0.0454015	0.0262945	0.0176929	0.0329332	0.00102912	0.00133842	0.00519896	0.000972087	0.00213465		0.0022204	0.00260755	0.00118502	0.00173178	0.00193619	7.9988e-05	4.80855e-05	0.000124194	8.32558e-05	8.38809e-05
NM_145996	513	237	419	169	170	248.75	25	34	18	35	28		1900	940	624	666	1032.5	90	62	41	86	69.75						0.0423441	0.0444468	0.0227886	0.0240623	0.0334104	0.00257281	0.00113766	0.00359928	0.00243022	0.00243499		0.00275018	0.00119101	0.00130645	0.000867846	0.00152887	0.000101393	4.88737e-05	9.42956e-05	9.17948e-05	8.40893e-05
NM_172728	338	257	366	197	255	268.75	143	229	73	213	164.5		191	188	46	190	153.75	65	92	15	119	72.75						0.0459175	0.0388247	0.0265642	0.0360934	0.0368499	0.0147165	0.00766245	0.0145971	0.0147896	0.0129414		0.000276465	0.000238202	9.63091e-05	0.000247584	0.00021464	7.32285e-05	7.25223e-05	3.44984e-05	0.000127018	7.68169e-05
NM_001256048	747	129	577	75	122	225.75	31	67	9	26	33.25		188	1074	84	373	429.75	35	93	10	159	74.25						0.0230481	0.0612072	0.0101133	0.0172682	0.0279092	0.00319029	0.00224185	0.00179964	0.0018053	0.00225927		0.000272123	0.00136079	0.000175869	0.000486046	0.000573707	3.94307e-05	7.33106e-05	2.29989e-05	0.000169714	7.63635e-05
NM_001172206	570	280	464	195	193	283	27	39	21	39	31.5		2082	992	677	791	1135.5	102	62	46	95	76.25						0.0500268	0.0492203	0.0262945	0.0273178	0.0382148	0.00277864	0.00130496	0.00419916	0.00270796	0.00274768		0.00301361	0.0012569	0.00141742	0.00103073	0.00167966	0.000114912	4.88737e-05	0.000105795	0.000101401	9.27456e-05
NM_001172205	571	280	465	195	194	283.5	27	39	21	39	31.5		2082	992	677	791	1135.5	102	62	46	95	76.25						0.0500268	0.0493264	0.0262945	0.0274593	0.0382768	0.00277864	0.00130496	0.00419916	0.00270796	0.00274768		0.00301361	0.0012569	0.00141742	0.00103073	0.00167966	0.000114912	4.88737e-05	0.000105795	0.000101401	9.27456e-05
NM_175308	197	72	273	69	83	124.25	22	83	14	45	41		318	386	121	281	276.5	66	88	52	100	76.5						0.012864	0.0289594	0.00930421	0.0117481	0.0157189	0.00226407	0.00277722	0.00279944	0.00312457	0.00274132		0.000460293	0.000489074	0.000253335	0.000366163	0.000392216	7.43551e-05	6.93692e-05	0.000119594	0.000106738	9.25142e-05
NM_029083	210	138	310	156	57	165.25	51	54	17	9	32.75		567	672	253	166	414.5	110	62	92	44	77						0.0246561	0.0328843	0.0210356	0.00806794	0.021661	0.00524853	0.00180687	0.00339932	0.000624913	0.00276991		0.00082071	0.000851446	0.0005297	0.00021631	0.000604541	0.000123925	4.88737e-05	0.00021159	4.69648e-05	0.000107838
NM_001190461	76	482	921	145	162	427.5	129	321	53	71	143.5		253	423	86	143	226.25	79	99	81	56	78.75						0.0861176	0.0976981	0.0195523	0.0229299	0.0565745	0.0132757	0.0107408	0.0105979	0.00492987	0.00988607		0.000366208	0.000535955	0.000180056	0.000186339	0.000317139	8.90007e-05	7.80403e-05	0.000186291	5.97734e-05	0.000103276
NM_001169577	94	87	288	99	88	140.5	62	151	23	69	76.25		148	267	56	96	141.75	38	136	39	107	80						0.015544	0.0305505	0.0133495	0.0124558	0.017975	0.00638057	0.00505253	0.00459908	0.004791	0.0052058		0.000214224	0.000338298	0.000117246	0.000125095	0.000198716	4.28105e-05	0.000107207	8.96958e-05	0.00011421	8.84808e-05
NM_009649	776	69	454	132	85	185	13	43	23	20	24.75		498	1342	263	738	710.25	48	120	34	119	80.25						0.012328	0.0481595	0.0177994	0.0120311	0.0225795	0.00133786	0.0014388	0.00459908	0.0013887	0.00219111		0.000720835	0.00170036	0.000550637	0.000961668	0.000983374	5.40764e-05	9.45943e-05	7.81963e-05	0.000127018	8.84714e-05
NM_175092	192	165	695	176	95	282.75	30	25	8	11	18.5		679	2299	457	495	982.5	89	170	32	38	82.25						0.0294801	0.0737244	0.0237325	0.0134466	0.0350959	0.00308737	0.000836512	0.00159968	0.000763783	0.00157184		0.000982826	0.00291291	0.00095681	0.000645021	0.00137439	0.000100267	0.000134009	7.35965e-05	4.05605e-05	8.71081e-05
NM_008872	540	546	1394	332	350	655.5	21	62	49	13	36.25		2067	2378	949	1313	1676.75	85	67	140	42	83.5						0.0975523	0.147873	0.0447681	0.04954	0.0849334	0.00216116	0.00207455	0.00979804	0.000902652	0.0037341		0.0029919	0.003013	0.0019869	0.00171093	0.00242568	9.57603e-05	5.28152e-05	0.000321985	4.483e-05	0.000128848
NM_001035533	874	67	446	134	90	184.25	13	44	23	20	25		498	1359	265	748	717.5	49	128	36	122	83.75						0.0119707	0.0473109	0.018069	0.0127389	0.0225224	0.00133786	0.00147226	0.00459908	0.0013887	0.00219947		0.000720835	0.0017219	0.000554824	0.000974698	0.000993064	5.5203e-05	0.000100901	8.27961e-05	0.000130221	9.22801e-05
NM_019743	209	82	270	85	43	120	61	78	42	36	54.25		197	235	93	86	152.75	99	118	37	83	84.25						0.0146507	0.0286411	0.0114617	0.00608634	0.01521	0.00627766	0.00260992	0.00839832	0.00249965	0.00494639		0.00028515	0.000297753	0.000194712	0.000112064	0.00022242	0.000111533	9.30178e-05	8.5096e-05	8.85927e-05	9.45598e-05
NM_001081354	784	128	569	76	121	223.5	31	72	9	27	34.75		203	1175	84	422	471	38	135	10	167	87.5						0.0228694	0.0603585	0.0102481	0.0171267	0.0276507	0.00319029	0.00240915	0.00179964	0.00187474	0.00231845		0.000293835	0.00148876	0.000175869	0.000549897	0.000627091	4.28105e-05	0.000106419	2.29989e-05	0.000178253	8.76202e-05
NM_008197	175	200	124	201	171	174	135	176	60	180	137.75		163	56	53	133	101.25	70	93	26	164	88.25						0.0357334	0.0131537	0.0271036	0.0242038	0.0250486	0.0138932	0.00588905	0.0119976	0.0124983	0.0110695		0.000235936	7.09538e-05	0.000110965	0.000173309	0.000147791	7.88614e-05	7.33106e-05	5.97972e-05	0.000175051	9.6755e-05
NM_001035532	861	67	446	134	91	184.5	13	44	23	20	25		498	1364	272	754	722	48	144	39	127	89.5						0.0119707	0.0473109	0.018069	0.0128804	0.0225578	0.00133786	0.00147226	0.00459908	0.0013887	0.00219947		0.000720835	0.00172823	0.00056948	0.000982517	0.00100027	5.40764e-05	0.000113513	8.96958e-05	0.000135557	9.82107e-05
NM_175658	110	1943	1791	1130	2436	1825	1980	2930	534	2717	2040.25		387	37	273	35	183	201	36	136	2	93.75						0.34715	0.189986	0.152373	0.344798	0.258577	0.203767	0.0980392	0.106779	0.188654	0.14931		0.000560167	4.68802e-05	0.000571573	4.56075e-05	0.000306057	0.000226445	2.83783e-05	0.000312785	2.13476e-06	0.000142436
NM_013558	622	101	452	225	100	219.5	43	235	36	59	93.25		214	254	304	82	213.5	63	173	51	98	96.25						0.0180454	0.0479474	0.0303398	0.0141543	0.0276217	0.00442523	0.00786321	0.00719856	0.00409665	0.00589592		0.000309757	0.000321826	0.000636477	0.000106852	0.000343728	7.09753e-05	0.000136373	0.000117294	0.000104603	0.000107312
NM_001013769	466	135	260	138	157	172.5	84	188	63	122	114.25		221	303	79	326	232.25	117	136	61	97	102.75						0.0241201	0.0275804	0.0186084	0.0222222	0.0231328	0.00864464	0.00629057	0.0125975	0.00847105	0.00900094		0.000319889	0.000383911	0.0001654	0.000424802	0.0003235	0.000131811	0.000107207	0.000140293	0.000103536	0.000120712
NM_001110849	351	148	201	81	83	128.25	9	29	11	18	16.75		1160	1109	468	734	867.75	35	165	68	153	105.25						0.0264427	0.0213217	0.0109223	0.0117481	0.0176087	0.000926212	0.000970354	0.00219956	0.00124983	0.00133649		0.00167905	0.00140514	0.00097984	0.000956455	0.00125512	3.94307e-05	0.000130067	0.000156393	0.000163309	0.0001223
NM_001083810	351	148	201	81	83	128.25	9	29	11	18	16.75		1160	1109	468	734	867.75	35	165	68	153	105.25						0.0264427	0.0213217	0.0109223	0.0117481	0.0176087	0.000926212	0.000970354	0.00219956	0.00124983	0.00133649		0.00167905	0.00140514	0.00097984	0.000956455	0.00125512	3.94307e-05	0.000130067	0.000156393	0.000163309	0.0001223
NM_175181	351	148	201	81	83	128.25	9	29	11	18	16.75		1160	1109	468	734	867.75	35	165	68	153	105.25						0.0264427	0.0213217	0.0109223	0.0117481	0.0176087	0.000926212	0.000970354	0.00219956	0.00124983	0.00133649		0.00167905	0.00140514	0.00097984	0.000956455	0.00125512	3.94307e-05	0.000130067	0.000156393	0.000163309	0.0001223
NM_027203	242	58	213	87	64	105.5	84	144	51	66	86.25		186	144	79	91	125	125	125	95	92	109.25						0.0103627	0.0225947	0.0117314	0.00905874	0.0134369	0.00864464	0.00481831	0.010198	0.0045827	0.0070609		0.000269228	0.000182453	0.0001654	0.00011858	0.000183915	0.000140824	9.85358e-05	0.00021849	9.81991e-05	0.000139012
NM_025983	33	124	916	207	563	452.5	194	1244	92	614	536		51	194	113	126	121	95	153	103	94	111.25						0.0221547	0.0971677	0.0279126	0.0796886	0.0567309	0.019965	0.0416248	0.0183963	0.042633	0.0306548		7.38205e-05	0.000245804	0.000236585	0.000164187	0.000180099	0.000107026	0.000120608	0.000236889	0.000100334	0.000141214
NM_009969	122	1581	2284	740	1585	1547.5	5	32	13	38	22		14987	20661	5555	19572	15193.8	24	189	169	77	114.75						0.282473	0.242283	0.0997843	0.224345	0.212221	0.000514562	0.00107074	0.00259948	0.00263852	0.00170583		0.0216931	0.0261781	0.0116304	0.0255037	0.0212513	2.70382e-05	0.000148986	0.000388682	8.21884e-05	0.000161724
NM_009705	335	137	222	83	55	124.25	25	16	38	3	20.5		781	1228	316	500	706.25	140	113	180	35	117						0.0244774	0.0235494	0.011192	0.00778485	0.0167509	0.00257281	0.000535368	0.00759848	0.000208304	0.00272874		0.00113047	0.00155592	0.000661601	0.000651536	0.00099988	0.000157723	8.90763e-05	0.000413981	3.73584e-05	0.000174535
NM_001161620	408	303	835	89	105	333	53	65	16	31	41.25		1089	1278	93	355	703.75	158	163	35	142	124.5						0.0541361	0.0885754	0.0120011	0.014862	0.0423936	0.00545436	0.00217493	0.00319936	0.00215248	0.00324528		0.00157628	0.00161927	0.000194712	0.000462591	0.000963214	0.000178001	0.000128491	8.04962e-05	0.000151568	0.000134639
NM_009801	241	97	120	118	94	107.25	18	46	17	17	24.5		996	531	742	629	724.5	134	132	139	114	129.75						0.0173307	0.0127294	0.0159115	0.013305	0.0148192	0.00185242	0.00153918	0.00339932	0.00118039	0.00199283		0.00144167	0.000672794	0.00155351	0.000819633	0.0011219	0.000150963	0.000104054	0.000319685	0.000121682	0.000174096
NM_146249	524	105	130	89	85	102.25	82	150	50	74	89		157	321	42	271	197.75	75	289	32	138	133.5						0.0187601	0.0137902	0.0120011	0.0120311	0.0141456	0.00843882	0.00501907	0.009998	0.00513818	0.00714852		0.000227251	0.000406717	8.79344e-05	0.000353133	0.000268759	8.44944e-05	0.000227815	7.35965e-05	0.000147299	0.000133301
NM_001001187	774	102	126	102	79	102.25	174	194	50	101	129.75		75	195	63	205	134.5	145	219	13	165	135.5						0.018224	0.0133659	0.013754	0.0111819	0.0141315	0.0179068	0.00649133	0.009998	0.00701291	0.0103523		0.00010856	0.000247071	0.000131902	0.00026713	0.000188666	0.000163356	0.000172635	2.98986e-05	0.000176118	0.000135502
NM_026131	169	170	365	113	97	186.25	63	51	29	32	43.75		455	455	279	190	344.75	205	171	97	72	136.25						0.0303734	0.0387186	0.0152373	0.0137297	0.0245147	0.00648348	0.00170648	0.00579884	0.00222191	0.00405268		0.000658595	0.0005765	0.000584135	0.000247584	0.000516703	0.000230951	0.000134797	0.00022309	7.68515e-05	0.000166422
NM_001159745	247	178	272	133	144	181.75	145	233	165	114	164.25		265	384	80	312	260.25	130	203	71	144	137						0.0318028	0.0288533	0.0179342	0.0203822	0.0247431	0.0149223	0.00779629	0.0329934	0.00791557	0.0159069		0.000383577	0.00048654	0.000167494	0.000406559	0.000361043	0.000146457	0.000160022	0.000163292	0.000153703	0.000155869
NM_013674	431	230	827	129	155	335.25	6	54	0	14	18.5		2810	4872	748	2298	2682	20	357	12	160	137.25						0.0410934	0.0877267	0.0173948	0.0219391	0.0420385	0.000617475	0.00180687	0	0.000972087	0.000849107		0.00406736	0.00617298	0.00156607	0.00299446	0.00370022	2.25318e-05	0.000281418	2.75987e-05	0.000170781	0.000125582
NM_001163239	168	77	126	95	126	106	193	373	44	179	197.25		47	209	87	260	150.75	103	152	69	228	138						0.0137574	0.0133659	0.0128101	0.0178344	0.0144419	0.0198621	0.0124808	0.00879824	0.0124288	0.0133925		6.80307e-05	0.00026481	0.00018215	0.000338799	0.000213447	0.000116039	0.000119819	0.000158693	0.000243363	0.000159479
NM_016740	79	705	2631	1039	1536	1477.75	1504	5538	761	1951	2438.5		29	449	9	189	169	61	207	13	282	140.75						0.12596	0.279092	0.140102	0.21741	0.190641	0.15478	0.185304	0.15217	0.135467	0.15693		4.19764e-05	0.000568897	1.88431e-05	0.000246281	0.000218999	6.87221e-05	0.000163175	2.98986e-05	0.000301002	0.000140699
NM_010755	137	211	794	105	78	297	30	66	12	27	33.75		1258	1690	698	454	1025	118	148	165	136	141.75						0.0376988	0.0842262	0.0141586	0.0110403	0.036781	0.00308737	0.00220839	0.00239952	0.00187474	0.00239251		0.00182091	0.00214128	0.00146139	0.000591595	0.00150379	0.000132938	0.000116666	0.000379482	0.000145164	0.000193563
NM_026467	65	159	621	153	396	332.25	122	673	42	517	338.5		61	387	195	57	175	157	102	233	76	142						0.0284081	0.0658746	0.0206311	0.056051	0.0427412	0.0125553	0.0225189	0.00839832	0.0358978	0.0198426		8.82951e-05	0.000490341	0.000408267	7.42751e-05	0.000265295	0.000176875	8.04052e-05	0.000535875	8.1121e-05	0.000218569
NM_010831	760	222	379	67	82	187.5	28	49	7	31	28.75		1221	1562	258	634	918.75	54	272	32	212	142.5						0.0396641	0.0402037	0.00903452	0.0116065	0.0251272	0.00288155	0.00163956	0.00139972	0.00215248	0.00201833		0.00176735	0.0019791	0.000540168	0.000826148	0.00127819	6.0836e-05	0.000214414	7.35965e-05	0.000226285	0.000143783
NM_183146	954	112	181	119	105	129.25	200	255	82	131	167		113	306	86	224	182.25	116	246	32	180	143.5						0.0200107	0.0192002	0.0160464	0.014862	0.0175298	0.0205825	0.00853242	0.0163967	0.00909596	0.0136519		0.000163563	0.000387712	0.000180056	0.000291888	0.000255805	0.000130685	0.000193918	7.35965e-05	0.000192129	0.000147582
NM_031869	251	89	175	69	119	113	124	211	47	143	131.25		96	139	126	193	138.5	152	219	56	161	147						0.0159014	0.0185637	0.00930421	0.0168436	0.0151532	0.0127611	0.00706016	0.00939812	0.00992918	0.00978715		0.000138956	0.000176117	0.000263803	0.000251493	0.000207592	0.000171242	0.000172635	0.000128794	0.000171848	0.00016113
NM_001114087	203	251	453	175	151	257.5	76	56	37	43	53		472	539	297	193	375.25	209	165	104	113	147.75						0.0448455	0.0480535	0.0235976	0.021373	0.0344674	0.00782134	0.00187379	0.00739852	0.0029857	0.00501984		0.000683201	0.00068293	0.000621822	0.000251493	0.000559862	0.000235458	0.000130067	0.000239189	0.000120614	0.000181332
NM_001080964	593	127	424	139	123	203.25	164	257	69	118	152		120	311	26	235	173	64	212	6	310	148						0.0226907	0.0449772	0.0187433	0.0174098	0.0259552	0.0168776	0.00859934	0.0137972	0.00819331	0.0118669		0.000173695	0.000394047	5.44356e-05	0.000306222	0.0002321	7.21019e-05	0.000167117	1.37994e-05	0.000330888	0.000145977
NM_030220	594	127	424	139	123	203.25	164	258	69	118	152.25		120	311	26	237	173.5	64	212	6	310	148						0.0226907	0.0449772	0.0187433	0.0174098	0.0259552	0.0168776	0.0086328	0.0137972	0.00819331	0.0118752		0.000173695	0.000394047	5.44356e-05	0.000308828	0.000232752	7.21019e-05	0.000167117	1.37994e-05	0.000330888	0.000145977
NM_013659	804	104	294	188	88	168.5	39	104	36	38	54.25		503	849	356	400	527	69	204	88	246	151.75						0.0185814	0.031187	0.0253506	0.0124558	0.0218937	0.00401358	0.00347989	0.00719856	0.00263852	0.00433264		0.000728073	0.00107571	0.000745348	0.000521229	0.00076759	7.77348e-05	0.00016081	0.000202391	0.000262576	0.000175878
NM_030082	107	1179	2251	493	1505	1357	1527	3466	319	2273	1896.25		525	189	150	89	238.25	288	147	90	85	152.5						0.210649	0.238782	0.0664779	0.213022	0.182233	0.157147	0.115974	0.0637872	0.157825	0.123683		0.000759917	0.000239469	0.000314051	0.000115973	0.000357353	0.000324458	0.000115878	0.00020699	9.07274e-05	0.000184514
NM_001177751	88	330	774	139	170	353.25	10	50	11	56	31.75		1764	1338	600	591	1073.25	52	161	47	362	155.5						0.0589602	0.0821046	0.0187433	0.0240623	0.0459676	0.00102912	0.00167302	0.00219956	0.00388835	0.00219751		0.00255332	0.00169529	0.00125621	0.000770116	0.00156873	5.85828e-05	0.000126914	0.000108095	0.000386392	0.000169996
NM_001001186	439	93	196	95	116	125	62	117	37	78	73.5		345	383	130	389	311.75	164	234	97	128	155.75						0.016616	0.0207913	0.0128101	0.016419	0.0166591	0.00638057	0.00391488	0.00739852	0.00541591	0.00577747		0.000499374	0.000485273	0.000272178	0.000506895	0.00044093	0.000184761	0.000184459	0.00022309	0.000136625	0.000182234
NM_029035	254	40	291	77	53	115.25	56	70	3	22	37.75		139	547	97	262	261.25	192	256	19	162	157.25						0.00714669	0.0308688	0.010383	0.00750177	0.013975	0.0057631	0.00234223	0.00059988	0.00152757	0.00255819		0.000201197	0.000693067	0.000203086	0.000341405	0.000359689	0.000216306	0.000201801	4.3698e-05	0.000172916	0.00015868
NM_008019	89	147	668	153	392	340	262	1024	109	576	492.75		83	146	61	171	115.25	155	192	60	230	159.25						0.0262641	0.0708603	0.0206311	0.0554848	0.0433101	0.0269631	0.0342635	0.0217956	0.0399944	0.0307542		0.000120139	0.000184987	0.000127714	0.000222825	0.000163916	0.000174622	0.000151351	0.000137994	0.000245498	0.000177366
NM_019739	633	45	228	72	57	100.5	63	100	23	35	55.25		101	732	49	317	299.75	87	273	21	259	160						0.00804002	0.0241858	0.00970874	0.00806794	0.0125006	0.00648348	0.00334605	0.00459908	0.00243022	0.00421471		0.000146194	0.000927467	0.00010259	0.000413074	0.000397331	9.80135e-05	0.000215202	4.82977e-05	0.000276452	0.000159491
NM_001170855	698	60	229	111	68	117	52	150	64	36	75.5		159	608	154	468	347.25	140	216	76	214	161.5						0.01072	0.0242919	0.0149676	0.00962491	0.0149011	0.00535145	0.00501907	0.0127974	0.00249965	0.0064169		0.000230146	0.000770356	0.000322426	0.000609838	0.000483191	0.000157723	0.00017027	0.000174792	0.00022842	0.000182801
NM_178872	710	60	229	111	68	117	52	150	64	37	75.75		159	609	154	468	347.5	140	216	76	214	161.5						0.01072	0.0242919	0.0149676	0.00962491	0.0149011	0.00535145	0.00501907	0.0127974	0.00256909	0.00643426		0.000230146	0.000771623	0.000322426	0.000609838	0.000483508	0.000157723	0.00017027	0.000174792	0.00022842	0.000182801
NM_022816	420	56	108	123	141	107	162	477	121	163	230.75		78	88	141	131	109.5	120	213	153	169	163.75						0.0100054	0.0114565	0.0165858	0.0199575	0.0145013	0.0166718	0.0159607	0.0241952	0.0113179	0.0170364		0.000112902	0.000111499	0.000295208	0.000170702	0.000172578	0.000135191	0.000167905	0.000351883	0.000180388	0.000208842
NM_011819	284	237	85	77	57	114	19	45	32	14	27.5		1206	315	527	255	575.75	176	108	259	112	163.75						0.0423441	0.00901665	0.010383	0.00806794	0.0174529	0.00195534	0.00150572	0.00639872	0.000972087	0.00270797		0.00174564	0.000399115	0.00110337	0.000332283	0.000895101	0.00019828	8.51349e-05	0.000595672	0.000119547	0.000249658
NM_133706	157	97	208	105	154	141	176	455	68	275	243.5		92	139	146	203	145	142	232	102	181	164.25						0.0173307	0.0220643	0.0141586	0.0217976	0.0188378	0.0181126	0.0152245	0.0135973	0.0190946	0.0165072		0.000133166	0.000176117	0.000305677	0.000264524	0.000219871	0.000159976	0.000182882	0.000234589	0.000193196	0.000192661
NM_008204	285	277	553	201	243	318.5	233	586	111	175	276.25		211	112	154	355	208	48	136	88	387	164.75						0.0494908	0.0586613	0.0271036	0.0343949	0.0424126	0.0239786	0.0196078	0.0221956	0.0121511	0.0194833		0.000305414	0.000141908	0.000322426	0.000462591	0.000308085	5.40764e-05	0.000107207	0.000202391	0.000413077	0.000194188
NM_011331	85	360	225	163	734	370.5	140	132	64	329	166.25		589	146	175	824	433.5	133	94	174	264	166.25						0.0643202	0.0238676	0.0219795	0.103892	0.0535149	0.0144077	0.00441678	0.0127974	0.022844	0.0136165		0.000852554	0.000184987	0.000366393	0.00107373	0.000619417	0.000149837	7.40989e-05	0.000400181	0.000281789	0.000226476
NM_009754	91	164	539	151	98	238	53	84	25	30	48		824	1293	352	526	748.75	181	259	49	185	168.5						0.0293014	0.0571762	0.0203614	0.0138712	0.0301775	0.00545436	0.00281068	0.004999	0.00208304	0.00383677		0.00119271	0.00163827	0.000736974	0.000685416	0.00106334	0.000203913	0.000204166	0.000112695	0.000197466	0.00017956
NM_013490	416	125	137	111	74	111.75	55	127	14	63	64.75		653	501	341	576	517.75	201	242	31	212	171.5						0.0223334	0.0145327	0.0149676	0.0104742	0.015577	0.00566018	0.00424948	0.00279944	0.00437439	0.00427087		0.000945192	0.000634783	0.000713943	0.00075057	0.000761122	0.000226445	0.000190765	7.12967e-05	0.000226285	0.000178698
NM_011138	460	70	106	167	233	144	241	481	214	280	304		85	113	19	218	108.75	97	151	38	401	171.75						0.0125067	0.0112443	0.0225189	0.0329795	0.0198123	0.0248019	0.0160945	0.0427914	0.0194417	0.0257824		0.000123034	0.000143175	3.97798e-05	0.00028407	0.000147515	0.000109279	0.000119031	8.73959e-05	0.00042802	0.000185932
NM_010215	611	50	204	117	91	115.5	32	304	126	44	126.5		90	279	75	194	159.5	87	221	218	170	174						0.00893336	0.02164	0.0157767	0.0128804	0.0148076	0.0032932	0.010172	0.025195	0.00305513	0.0104288		0.000130271	0.000353502	0.000157026	0.000252796	0.000223399	9.80135e-05	0.000174211	0.000501376	0.000181455	0.000238764
NM_001171024	619	50	205	117	91	115.75	32	304	126	44	126.5		90	281	75	195	160.25	87	221	218	170	174						0.00893336	0.021746	0.0157767	0.0128804	0.0148341	0.0032932	0.010172	0.025195	0.00305513	0.0104288		0.000130271	0.000356036	0.000157026	0.000254099	0.000224358	9.80135e-05	0.000174211	0.000501376	0.000181455	0.000238764
NM_001163555	466	70	105	163	230	142	243	480	211	274	302		86	109	21	216	108	82	169	40	409	175						0.0125067	0.0111382	0.0219795	0.0325548	0.0195448	0.0250077	0.016061	0.0421916	0.0190251	0.0255714		0.000124482	0.000138106	4.39672e-05	0.000281464	0.000147005	9.23805e-05	0.00013322	9.19957e-05	0.000436559	0.000188539
NM_008990	511	117	362	77	74	157.5	87	150	34	43	78.5		272	394	168	195	257.25	196	276	112	117	175.25						0.0209041	0.0384003	0.010383	0.0104742	0.0200404	0.00895338	0.00501907	0.00679864	0.0029857	0.0059392		0.000393709	0.000499211	0.000351737	0.000254099	0.000374689	0.000220812	0.000217567	0.000257588	0.000124884	0.000205213
NM_199449	817	169	320	157	69	178.75	42	55	47	15	39.75		1033	1729	415	675	963	148	208	113	238	176.75						0.0301947	0.0339451	0.0211704	0.00976645	0.0237692	0.00432232	0.00184033	0.00939812	0.00104152	0.00415057		0.00149523	0.0021907	0.000868875	0.000879574	0.00135859	0.000166736	0.000163964	0.000259888	0.000254037	0.000211156
NM_025617	188	85	146	74	118	105.75	149	368	72	200	197.25		78	247	26	160	127.75	175	274	24	237	177.5						0.0151867	0.0154874	0.00997843	0.0167021	0.0143387	0.015334	0.0123135	0.0143971	0.013887	0.0139829		0.000112902	0.000312957	5.44356e-05	0.000208492	0.000172197	0.000197154	0.00021599	5.51974e-05	0.000252969	0.000180328
NM_198934	763	77	176	90	74	104.25	106	155	50	79	97.5		175	370	57	237	209.75	191	231	27	261	177.5						0.0137574	0.0186698	0.0121359	0.0104742	0.0137593	0.0109087	0.00518637	0.009998	0.00548535	0.00789461		0.000253306	0.000468802	0.000119339	0.000308828	0.000287569	0.000215179	0.000182094	6.20971e-05	0.000278587	0.000184489
NM_001163556	444	71	107	172	233	145.75	241	482	214	281	304.5		86	111	21	217	108.75	86	167	40	418	177.75						0.0126854	0.0113504	0.0231931	0.0329795	0.0200521	0.0248019	0.016128	0.0427914	0.0195112	0.0258081		0.000124482	0.000140641	4.39672e-05	0.000282767	0.000147964	9.68869e-05	0.000131644	9.19957e-05	0.000446166	0.000191673
NM_010171	275	302	170	129	140	185.25	1	114	12	33	40		1765	790	416	783	938.5	56	314	71	271	178						0.0539575	0.0180333	0.0173948	0.019816	0.0273004	0.000102912	0.0038145	0.00239952	0.00229135	0.00215207		0.00255477	0.00100096	0.000870969	0.00102031	0.00136175	6.30891e-05	0.000247522	0.000163292	0.00028926	0.000190791
NM_011137	774	78	177	90	74	104.75	106	156	50	80	98		176	370	58	244	212	191	231	27	264	178.25						0.013936	0.0187759	0.0121359	0.0104742	0.0138305	0.0109087	0.00521984	0.009998	0.00555478	0.00792033		0.000254753	0.000468802	0.000121433	0.00031795	0.000290734	0.000215179	0.000182094	6.20971e-05	0.000281789	0.00018529
NM_001199902	111	128	265	189	128	177.5	278	566	163	188	298.75		179	93	121	124	129.25	234	210	150	125	179.75						0.0228694	0.0281107	0.0254854	0.0181175	0.0236458	0.0286097	0.0189386	0.0325935	0.0130537	0.0232989		0.000259095	0.000117834	0.000253335	0.000161581	0.000197961	0.000263622	0.00016554	0.000344984	0.000133423	0.000226892
NM_206882	135	1031	1639	446	1164	1070	1425	2752	307	1815	1574.75		252	143	91	74	140	258	256	79	130	180.75						0.184206	0.173862	0.0601402	0.164756	0.145741	0.14665	0.0920832	0.0613877	0.126024	0.106536		0.00036476	0.000181186	0.000190524	9.64274e-05	0.000208224	0.000290661	0.000201801	0.000181691	0.00013876	0.000203228
NM_008176	77	3014	9712	2455	1525	4176.5	110	381	656	75	305.5		2219	4186	1620	1518	2385.75	52	158	454	60	181						0.538503	1.03023	0.331041	0.215853	0.528907	0.0113204	0.0127484	0.131174	0.00520761	0.0401125		0.00321192	0.0053038	0.00339175	0.00197806	0.00347138	5.85828e-05	0.000124549	0.00104415	6.40429e-05	0.000322831
NM_198933	739	77	175	95	73	105	106	156	52	79	98.25		173	372	57	239	210.25	191	236	27	271	181.25						0.0137574	0.0185637	0.0128101	0.0103326	0.013866	0.0109087	0.00521984	0.0103979	0.00548535	0.00800296		0.000250411	0.000471336	0.000119339	0.000311434	0.00028813	0.000215179	0.000186036	6.20971e-05	0.00028926	0.000188143
NM_198932	750	78	176	95	73	105.5	106	157	52	80	98.75		174	372	58	246	212.5	191	236	27	274	182						0.013936	0.0186698	0.0128101	0.0103326	0.0139371	0.0109087	0.0052533	0.0103979	0.00555478	0.00802868		0.000251858	0.000471336	0.000121433	0.000320556	0.000291296	0.000215179	0.000186036	6.20971e-05	0.000292463	0.000188944
NM_175652	84	288	472	290	400	362.5	197	554	74	300	281.25		602	342	235	746	481.25	112	347	42	227	182						0.0514561	0.050069	0.0391046	0.0566171	0.0493117	0.0202737	0.0185371	0.014797	0.0208304	0.0186096		0.000871371	0.000433325	0.000492014	0.000972092	0.000692201	0.000126178	0.000273535	9.65955e-05	0.000242296	0.000184651
NM_008207	344	938	1796	881	836	1112.75	1229	1853	546	791	1104.75		162	90	139	328	179.75	162	109	146	317	183.5						0.16759	0.190517	0.118797	0.11833	0.148808	0.126479	0.0620023	0.109178	0.0549229	0.0881457		0.000234489	0.000114033	0.000291021	0.000427408	0.000266738	0.000182508	8.59232e-05	0.000335784	0.00033836	0.000235644
NM_134133	41	163	400	70	131	191	53	71	20	48	48		248	604	177	230	314.75	139	321	89	189	184.5						0.0291227	0.0424313	0.00943905	0.0185421	0.0248838	0.00545436	0.00237569	0.0039992	0.00333287	0.00379053		0.00035897	0.000765287	0.000370581	0.000299707	0.000448636	0.000156596	0.00025304	0.00020469	0.000201735	0.000204015
NM_024239	405	80	153	76	146	113.75	223	428	79	215	236.25		89	255	80	233	164.25	213	205	100	222	185						0.0142934	0.01623	0.0102481	0.0206653	0.0153592	0.0229495	0.0143211	0.0157968	0.0149285	0.016999		0.000128824	0.000323093	0.000167494	0.000303616	0.000230757	0.000239964	0.000161599	0.000229989	0.000236959	0.000217128
NM_178825	210	60	120	115	109	101	163	255	59	172	162.25		154	52	109	116	107.75	269	140	108	224	185.25						0.01072	0.0127294	0.015507	0.0154282	0.0135962	0.0167747	0.00853242	0.0117976	0.0119428	0.0122619		0.000222909	6.58857e-05	0.000228211	0.000151156	0.00016704	0.000303053	0.00011036	0.000248388	0.000239093	0.000225224
NM_019870	216	74	171	91	119	113.75	131	361	83	158	183.25		140	182	119	222	165.75	255	153	111	226	186.25						0.0132214	0.0181394	0.0122708	0.0168436	0.0151188	0.0134815	0.0120792	0.0165967	0.0109707	0.013282		0.000202645	0.0002306	0.000249147	0.000289282	0.000242918	0.000287281	0.000120608	0.000255288	0.000241228	0.000226101
NM_010270	87	40	185	43	133	100.25	102	358	60	177	174.25		95	133	130	113	117.75	183	292	117	168	190						0.00714669	0.0196245	0.00579827	0.0188252	0.0128487	0.0104971	0.0119789	0.0119976	0.01229	0.0116909		0.000137509	0.000168515	0.000272178	0.000147247	0.000181362	0.000206166	0.00023018	0.000269087	0.00017932	0.000221188
NM_001163006	57	164	421	163	284	258	256	878	87	429	412.5		85	208	70	257	155	175	279	95	211	190						0.0293014	0.044659	0.0219795	0.0401982	0.0340345	0.0263456	0.0293783	0.0173965	0.0297875	0.025727		0.000123034	0.000263543	0.000146557	0.00033489	0.000217006	0.000197154	0.000219932	0.00021849	0.000225218	0.000215198
NM_029466	161	610	856	238	164	467	27	75	29	29	40		1478	2774	255	964	1367.75	140	377	70	173	190						0.108987	0.090803	0.0320928	0.023213	0.0637739	0.00277864	0.00250954	0.00579884	0.00201361	0.00327516		0.00213935	0.00351475	0.000533887	0.00125616	0.00186104	0.000157723	0.000297184	0.000160992	0.000184657	0.000200139
NM_025300	185	52	202	99	108	115.25	142	569	69	168	237		44	129	60	207	110	61	410	64	230	191.25						0.00929069	0.0214278	0.0133495	0.0152866	0.0148387	0.0146136	0.019039	0.0137972	0.011665	0.0147787		6.36883e-05	0.000163447	0.000125621	0.000269736	0.000155623	6.87221e-05	0.000323197	0.000147193	0.000245498	0.000196153
NM_173378	1115	68	197	90	95	112.5	111	173	40	77	100.25		202	509	74	357	285.5	92	278	37	364	192.75						0.0121494	0.0208974	0.0121359	0.0134466	0.0146573	0.0114233	0.00578866	0.0079984	0.00534648	0.00763921		0.000292387	0.000644919	0.000154932	0.000465197	0.000389359	0.000103646	0.000219144	8.5096e-05	0.000388527	0.000199103
NM_001163554	564	72	114	179	244	152.25	260	490	218	293	315.25		88	99	17	237	110.25	102	211	52	410	193.75						0.012864	0.0120929	0.024137	0.0345364	0.0209076	0.0267572	0.0163956	0.0435913	0.0203444	0.0267721		0.000127377	0.000125436	3.55925e-05	0.000308828	0.000149308	0.000114912	0.000166328	0.000119594	0.000437626	0.000209615
NM_001080818	584	85	227	53	53	104.5	29	36	6	10	20.25		707	1085	274	545	652.75	222	261	57	246	196.5						0.0151867	0.0240798	0.00714671	0.00750177	0.0134787	0.00298446	0.00120458	0.00119976	0.000694348	0.00152079		0.00102335	0.00137473	0.000573667	0.000710175	0.000920482	0.000250103	0.000205743	0.000131094	0.000262576	0.000212379
NM_007984	474	365	2626	376	323	922.5	115	147	76	50	97		898	4136	665	1712	1852.75	191	237	171	188	196.75						0.0652135	0.278562	0.0507012	0.0457183	0.110049	0.0118349	0.00491869	0.015197	0.00347174	0.00885558		0.00129982	0.00524044	0.00139229	0.00223086	0.00254085	0.000215179	0.000186824	0.000393282	0.000200668	0.000248988
NM_010760	127	227	427	271	233	289.5	408	685	256	248	399.25		190	270	154	225	209.75	228	241	139	185	198.25						0.0405574	0.0452954	0.0365426	0.0329795	0.0388437	0.0419883	0.0229204	0.0511898	0.0172198	0.0333296		0.000275018	0.000342099	0.000322426	0.000293191	0.000308183	0.000256863	0.000189977	0.000319685	0.000197466	0.000240998
NM_172705	277	75	269	78	65	121.75	92	119	44	64	79.75		153	674	75	336	309.5	168	313	50	269	200						0.0134	0.0285351	0.0105178	0.00920028	0.0154133	0.00946794	0.0039818	0.00879824	0.00444383	0.00667295		0.000221462	0.00085398	0.000157026	0.000437832	0.000417575	0.000189267	0.000246734	0.000114995	0.000287126	0.00020953
NM_007856	452	101	125	91	96	103.25	241	240	21	193	173.75		148	242	84	261	183.75	300	184	64	259	201.75						0.0180454	0.0132598	0.0122708	0.0135881	0.014291	0.0248019	0.00803052	0.00419916	0.0134009	0.0126081		0.000214224	0.000306622	0.000175869	0.000340102	0.000259204	0.000337978	0.000145045	0.000147193	0.000276452	0.000226667
NM_025440	116	62	141	88	135	106.5	245	345	74	189	213.25		73	120	131	119	110.75	192	242	91	285	202.5						0.0110774	0.014957	0.0118662	0.0191083	0.0142522	0.0252135	0.0115439	0.014797	0.0131232	0.0161694		0.000105665	0.000152044	0.000274271	0.000155066	0.000171761	0.000216306	0.000190765	0.00020929	0.000304204	0.000230141
NM_001159724	448	113	340	78	61	148	85	145	31	41	75.5		351	425	186	189	287.75	256	241	156	169	205.5						0.0201894	0.0360666	0.0105178	0.00863411	0.018852	0.00874756	0.00485177	0.00619876	0.00284683	0.00566123		0.000508059	0.000538489	0.000389424	0.000246281	0.000420563	0.000288407	0.000189977	0.000358783	0.000180388	0.000254389
NM_001177965	206	76	184	91	126	119.25	136	378	78	174	191.5		167	210	147	251	193.75	283	174	116	259	208						0.0135787	0.0195184	0.0122708	0.0178344	0.0158006	0.0139961	0.0126481	0.0155969	0.0120817	0.0135807		0.000241726	0.000266077	0.00030777	0.000327071	0.000285661	0.000318825	0.000137162	0.000266787	0.000276452	0.000249807
NM_145484	532	78	134	132	69	103.25	217	270	96	94	169.25		50	227	41	219	134.25	87	446	17	288	209.5						0.013936	0.0142145	0.0177994	0.00976645	0.0139291	0.022332	0.00903433	0.0191962	0.00652687	0.0142723		7.2373e-05	0.000287616	8.58407e-05	0.000285373	0.000182801	9.80135e-05	0.000351576	3.90982e-05	0.000307406	0.000199023
NM_010828	250	408	1070	417	481	594	278	1158	106	433	493.75		269	729	81	574	413.25	93	386	34	330	210.75						0.0728962	0.113504	0.0562298	0.0680821	0.077678	0.0286097	0.0387472	0.0211958	0.0300653	0.0296545		0.000389367	0.000923666	0.000169588	0.000747964	0.000557646	0.000104773	0.000304278	7.81963e-05	0.000352236	0.000209871
NM_001252550	104	104	143	67	102	104	261	315	80	147	200.75		113	165	106	148	133	217	310	85	234	211.5						0.0185814	0.0151692	0.00903452	0.0144374	0.0143056	0.0268601	0.0105401	0.0159968	0.0102069	0.015901		0.000163563	0.00020906	0.00022193	0.000192855	0.000196852	0.00024447	0.000244369	0.000195491	0.000249767	0.000233524
NM_029100	538	230	357	226	147	240	435	562	147	220	341		166	336	70	339	227.75	170	288	93	298	212.25						0.0410934	0.0378699	0.0304746	0.0208068	0.0325612	0.0447669	0.0188048	0.0293941	0.0152757	0.0270604		0.000240278	0.000425723	0.000146557	0.000441742	0.000313575	0.000191521	0.000227026	0.00021389	0.00031808	0.000237629
NM_001169576	133	114	376	86	111	171.75	77	179	35	73	91		503	903	228	377	502.75	242	262	69	283	214						0.0203681	0.0398854	0.0115965	0.0157113	0.0218903	0.00792426	0.00598943	0.0069986	0.00506874	0.00649526		0.000728073	0.00114413	0.000477358	0.000491258	0.000710205	0.000272635	0.000206531	0.000158693	0.000302069	0.000234982
NM_001253715	174	73	145	70	112	100	204	251	53	164	168		83	167	130	192	143	214	284	114	249	215.25						0.0130427	0.0153814	0.00943905	0.0158528	0.013429	0.0209941	0.00839858	0.0105979	0.0113873	0.0128445		0.000120139	0.000211594	0.000272178	0.00025019	0.000213525	0.000241091	0.000223873	0.000262188	0.000265778	0.000248232
NM_013651	466	213	558	201	359	332.75	449	933	161	497	510		167	175	78	227	161.75	333	247	75	207	215.5						0.0380561	0.0591917	0.0271036	0.0508139	0.0437913	0.0462077	0.0312186	0.0321936	0.0345091	0.0360322		0.000241726	0.000221731	0.000163307	0.000295797	0.00023064	0.000375155	0.000194707	0.000172492	0.000220948	0.000240825
NM_009855	287	214	220	177	84	173.75	227	294	119	95	183.75		467	743	263	410	470.75	245	255	145	234	219.75						0.0382348	0.0233372	0.0238673	0.0118896	0.0243322	0.0233611	0.00983738	0.0237952	0.00659631	0.0158975		0.000675964	0.000941405	0.000550637	0.00053426	0.000675566	0.000276015	0.000201013	0.000333484	0.000249767	0.00026507
NM_175115	400	76	226	73	73	112	56	86	14	40	49		436	1153	168	578	583.75	137	387	51	305	220						0.0135787	0.0239737	0.00984358	0.0103326	0.0144322	0.0057631	0.0028776	0.00279944	0.00277739	0.00355438		0.000631093	0.00146089	0.000351737	0.000753176	0.000799224	0.000154343	0.000305067	0.000117294	0.000325551	0.000225564
NM_008655	141	5352	14966	3201	3111	6657.5	109	550	178	169	251.5		7043	8571	3676	3094	5596	113	336	264	174	221.75						0.956227	1.58757	0.431634	0.44034	0.853942	0.0112175	0.0184033	0.0355929	0.0117345	0.019237		0.0101945	0.0108597	0.00769635	0.00403171	0.00819556	0.000127305	0.000264864	0.000607172	0.000185724	0.000296266
NM_021463	299	59	113	117	123	103	173	355	92	191	202.75		159	163	131	253	176.5	198	283	107	300	222						0.0105414	0.0119868	0.0157767	0.0174098	0.0139287	0.0178038	0.0118785	0.0183963	0.013262	0.0153352		0.000230146	0.000206526	0.000274271	0.000329677	0.000260155	0.000223065	0.000223085	0.000246088	0.000320215	0.000253113
NM_009477	292	114	275	130	184	175.75	72	562	136	53	205.75		188	439	336	336	324.75	106	439	261	89	223.75						0.0203681	0.0291715	0.0175297	0.0260439	0.0232783	0.00740969	0.0188048	0.0271946	0.00368004	0.0142723		0.000272123	0.000556227	0.000703475	0.000437832	0.000492414	0.000119419	0.000346058	0.000600272	9.4997e-05	0.000290186
NM_001159402	292	114	275	130	184	175.75	72	562	136	53	205.75		188	439	336	336	324.75	106	439	261	89	223.75						0.0203681	0.0291715	0.0175297	0.0260439	0.0232783	0.00740969	0.0188048	0.0271946	0.00368004	0.0142723		0.000272123	0.000556227	0.000703475	0.000437832	0.000492414	0.000119419	0.000346058	0.000600272	9.4997e-05	0.000290186
NM_001159401	292	114	275	130	184	175.75	72	562	136	53	205.75		188	439	336	336	324.75	106	439	261	89	223.75						0.0203681	0.0291715	0.0175297	0.0260439	0.0232783	0.00740969	0.0188048	0.0271946	0.00368004	0.0142723		0.000272123	0.000556227	0.000703475	0.000437832	0.000492414	0.000119419	0.000346058	0.000600272	9.4997e-05	0.000290186
NM_010249	329	194	419	164	133	227.5	100	210	54	75	109.75		563	650	292	474	494.75	239	264	150	252	226.25						0.0346614	0.0444468	0.0221143	0.0188252	0.0300119	0.0102912	0.0070267	0.0107978	0.00520761	0.00833085		0.00081492	0.000823571	0.000611353	0.000617656	0.000716875	0.000269255	0.000208108	0.000344984	0.00026898	0.000272832
NM_011410	583	554	1018	777	474	705.75	542	882	398	393	553.75		481	125	192	415	303.25	355	223	177	153	227						0.0989816	0.107988	0.104773	0.0670913	0.0947085	0.0557785	0.0295121	0.0795841	0.0272879	0.0480407		0.000696229	0.000158379	0.000401986	0.000540775	0.000449342	0.00039994	0.000175788	0.000407081	0.000163309	0.00028653
NM_001110854	101	103	244	29	35	102.75	44	60	5	24	33.25		967	1221	136	185	627.25	398	323	36	153	227.5						0.0184027	0.0258831	0.00391046	0.004954	0.0132876	0.00452815	0.00200763	0.0009998	0.00166644	0.0023005		0.00139969	0.00154705	0.00028474	0.000241068	0.000868137	0.000448384	0.000254616	8.27961e-05	0.000163309	0.000237276
NM_175102	67	102	301	49	195	161.75	160	478	32	253	230.75		119	151	124	91	121.25	269	218	80	345	228						0.018224	0.0319296	0.00660734	0.0276008	0.0210904	0.016466	0.0159941	0.00639872	0.017567	0.0141065		0.000172248	0.000191322	0.000259616	0.00011858	0.000185441	0.000303053	0.000171846	0.000183991	0.000368247	0.000256784
NM_134054	52	69	271	46	140	131.5	116	447	32	180	193.75		53	224	51	140	117	156	406	35	317	228.5						0.012328	0.0287472	0.0062028	0.019816	0.0167735	0.0119378	0.0149568	0.00639872	0.0124983	0.0114479		7.67154e-05	0.000283815	0.000106777	0.00018243	0.000162435	0.000175748	0.000320044	8.04962e-05	0.00033836	0.000228662
NM_133358	540	162	275	153	135	181.25	175	286	99	163	180.75		263	449	143	264	279.75	238	360	102	218	229.5						0.0289441	0.0291715	0.0206311	0.0191083	0.0244637	0.0180097	0.0095697	0.019796	0.0113179	0.0146733		0.000380682	0.000568897	0.000299396	0.000344011	0.000398247	0.000268129	0.000283783	0.000234589	0.000232689	0.000254798
NM_007564	319	206	1082	124	310	430.5	215	438	79	316	262		143	837	16	284	320	72	323	20	513	232						0.0368054	0.114777	0.0167206	0.0438783	0.0530453	0.0221262	0.0146557	0.0157968	0.0219414	0.01863		0.000206987	0.00106051	3.34988e-05	0.000370073	0.000417766	8.11146e-05	0.000254616	4.59978e-05	0.000547567	0.000232324
NM_007924	583	77	161	66	112	104	125	280	65	108	144.5		158	277	123	197	188.75	268	258	90	314	232.5						0.0137574	0.0170786	0.00889968	0.0158528	0.0138971	0.0128641	0.00936894	0.0129974	0.00749896	0.0106823		0.000228699	0.000350968	0.000257522	0.000256705	0.000273474	0.000301927	0.000203378	0.00020699	0.000335158	0.000261863
NM_025352	63	93	290	105	273	190.25	225	573	73	409	320		200	67	199	91	139.25	372	162	268	129	232.75						0.016616	0.0307627	0.0141586	0.0386412	0.0250446	0.0231553	0.0191729	0.0145971	0.0283988	0.021331		0.000289492	8.48911e-05	0.000416641	0.00011858	0.000227401	0.000419092	0.000127702	0.000616371	0.000137692	0.000325214
NM_025426	214	107	189	93	133	130.5	135	293	45	130	150.75		154	172	87	194	151.75	165	455	89	222	232.75						0.0191174	0.0200488	0.0125405	0.0188252	0.017633	0.0138932	0.00980392	0.0089982	0.00902652	0.0104305		0.000222909	0.00021793	0.00018215	0.000252796	0.000218946	0.000185888	0.00035867	0.00020469	0.000236959	0.000246552
NM_001104556	214	107	189	93	133	130.5	135	293	45	130	150.75		154	172	87	194	151.75	165	455	89	222	232.75						0.0191174	0.0200488	0.0125405	0.0188252	0.017633	0.0138932	0.00980392	0.0089982	0.00902652	0.0104305		0.000222909	0.00021793	0.00018215	0.000252796	0.000218946	0.000185888	0.00035867	0.00020469	0.000236959	0.000246552
NM_001104530	214	107	189	93	133	130.5	135	293	45	130	150.75		154	172	87	194	151.75	165	455	89	222	232.75						0.0191174	0.0200488	0.0125405	0.0188252	0.017633	0.0138932	0.00980392	0.0089982	0.00902652	0.0104305		0.000222909	0.00021793	0.00018215	0.000252796	0.000218946	0.000185888	0.00035867	0.00020469	0.000236959	0.000246552
NM_001104557	214	107	189	93	133	130.5	135	293	45	130	150.75		154	172	87	194	151.75	165	455	89	222	232.75						0.0191174	0.0200488	0.0125405	0.0188252	0.017633	0.0138932	0.00980392	0.0089982	0.00902652	0.0104305		0.000222909	0.00021793	0.00018215	0.000252796	0.000218946	0.000185888	0.00035867	0.00020469	0.000236959	0.000246552
NM_178084	270	95	194	104	68	115.25	71	156	44	76	86.75		241	476	162	269	287	223	318	80	314	233.75						0.0169734	0.0205792	0.0140237	0.00962491	0.0153003	0.00730678	0.00521984	0.00879824	0.00527704	0.00665048		0.000348838	0.000603107	0.000339175	0.000350527	0.000410412	0.00025123	0.000250675	0.000183991	0.000335158	0.000255264
NM_010738	115	219	88	207	14	132	361	155	125	9	162.5		307	137	432	42	229.5	476	200	250	17	235.75						0.0391281	0.00933489	0.0279126	0.0019816	0.0195893	0.0371514	0.00518637	0.024995	0.000624913	0.0169894		0.00044437	0.000173583	0.000904468	5.4729e-05	0.000394288	0.000536258	0.000157657	0.000574973	1.81455e-05	0.000321758
NM_007570	139	357	439	146	189	282.75	90	186	34	72	95.5		1485	545	602	525	789.25	295	290	209	151	236.25						0.0637842	0.0465684	0.0196872	0.0267516	0.0391978	0.00926212	0.00622365	0.00679864	0.00499931	0.00682093		0.00214948	0.000690532	0.00126039	0.000684113	0.00119613	0.000332345	0.000228603	0.000480677	0.000161175	0.0003007
NM_001081287	557	484	1319	136	147	521.5	125	119	44	50	84.5		1793	2647	174	677	1322.75	279	362	64	242	236.75						0.0864749	0.139917	0.0183387	0.0208068	0.0663844	0.0128641	0.0039818	0.00879824	0.00347174	0.00727896		0.0025953	0.00335383	0.000364299	0.00088218	0.0017989	0.000314319	0.00028536	0.000147193	0.000258306	0.000251295
NM_172612	213	711	1322	505	346	721	44	69	118	46	69.25		2105	3137	1048	1197	1871.75	83	261	510	94	237						0.127032	0.140235	0.068096	0.0489738	0.0960844	0.00452815	0.00230877	0.0235953	0.003194	0.00840655		0.0030469	0.00397468	0.00219417	0.00155978	0.00269388	9.35071e-05	0.000205743	0.00117294	0.000100334	0.000393132
NM_001101502	575	131	363	100	129	180.75	177	478	63	140	214.5		76	469	44	330	229.75	124	336	23	467	237.5						0.0234054	0.0385064	0.0134844	0.018259	0.0234138	0.0182155	0.0159941	0.0125975	0.00972087	0.014132		0.000110007	0.000594238	9.21217e-05	0.000430014	0.000306595	0.000139697	0.000264864	5.28975e-05	0.000498467	0.000238982
NM_001146211	181	73	153	90	124	110	180	518	62	161	230.25		74	186	105	203	142	92	466	119	278	238.75						0.0130427	0.01623	0.0121359	0.0175513	0.01474	0.0185242	0.0173325	0.0123975	0.011179	0.0148583		0.000107112	0.000235668	0.000219836	0.000264524	0.000206785	0.000103646	0.000367341	0.000273687	0.000296732	0.000260352
NM_001013365	244	1281	2100	414	327	1030.5	62	91	85	35	68.25		4304	3242	1166	1210	2480.5	325	208	305	122	240						0.228873	0.222764	0.0558252	0.0462845	0.138437	0.00638057	0.0030449	0.0169966	0.00243022	0.00721307		0.00622987	0.00410772	0.00244123	0.00157672	0.00358888	0.000366142	0.000163964	0.000701467	0.000130221	0.000340448
NM_010183	447	101	436	101	116	188.5	157	361	97	163	194.5		112	784	50	629	393.75	165	330	53	415	240.75						0.0180454	0.0462501	0.0136192	0.016419	0.0235834	0.0161573	0.0120792	0.0193961	0.0113179	0.0147376		0.000162116	0.000993353	0.000104684	0.000819633	0.000519946	0.000185888	0.000260134	0.000121894	0.000442963	0.00025272
NM_009142	376	316	456	210	114	274	423	211	127	72	208.25		356	587	246	241	357.5	475	217	130	146	242						0.0564588	0.0483717	0.0283172	0.0161359	0.0373209	0.043532	0.00706016	0.0253949	0.00499931	0.0202466		0.000515296	0.000743748	0.000515044	0.00031404	0.000522032	0.000535131	0.000171058	0.000298986	0.000155838	0.000290253
NM_001081390	1094	102	130	68	110	102.5	295	256	87	130	192		307	128	55	246	184	412	118	67	372	242.25						0.018224	0.0137902	0.00916936	0.0155697	0.0141883	0.0303592	0.00856588	0.0173965	0.00902652	0.016337		0.00044437	0.00016218	0.000115152	0.000320556	0.000260565	0.000464156	9.30178e-05	0.000154093	0.000397066	0.000277083
NM_001253714	191	91	155	93	115	113.5	228	251	60	169	177		97	238	137	216	172	224	320	128	299	242.75						0.0162587	0.0164421	0.0125405	0.0162774	0.0153797	0.023464	0.00839858	0.0119976	0.0117345	0.0138987		0.000140404	0.000301554	0.000286834	0.000281464	0.000252564	0.000252357	0.000252252	0.000294386	0.000319147	0.000279535
NM_001077508	192	166	158	42	60	106.5	130	102	72	21	81.25		642	279	160	163	311	421	207	255	94	244.25						0.0296587	0.0167604	0.00566343	0.00849257	0.0151438	0.0133786	0.00341297	0.0143971	0.00145813	0.00816171		0.00092927	0.000353502	0.000334988	0.000212401	0.00045754	0.000474295	0.000163175	0.000586472	0.000100334	0.000331069
NM_001146212	182	73	153	90	124	110	181	518	62	161	230.5		89	177	95	200	140.25	89	490	117	289	246.25						0.0130427	0.01623	0.0121359	0.0175513	0.01474	0.0186271	0.0173325	0.0123975	0.011179	0.0148841		0.000128824	0.000224265	0.000198899	0.000260615	0.000203151	0.000100267	0.00038626	0.000269087	0.000308473	0.000266022
NM_212438	937	65	188	78	83	103.5	116	257	50	101	131		86	391	35	450	240.5	100	343	15	533	247.75						0.0116134	0.0199427	0.0105178	0.0117481	0.0134555	0.0119378	0.00859934	0.009998	0.00701291	0.00938703		0.000124482	0.00049541	7.32786e-05	0.000586383	0.000319888	0.000112659	0.000270382	3.44984e-05	0.000568914	0.000246614
NM_011717	936	65	181	77	83	101.5	115	254	50	99	129.5		86	391	35	445	239.25	100	342	15	536	248.25						0.0116134	0.0192002	0.010383	0.0117481	0.0132361	0.0118349	0.00849896	0.009998	0.00687405	0.00930148		0.000124482	0.00049541	7.32786e-05	0.000579867	0.000318259	0.000112659	0.000269594	3.44984e-05	0.000572117	0.000247217
NM_207669	363	208	439	155	137	234.75	115	225	57	78	118.75		571	700	292	489	513	254	295	156	299	251						0.0371628	0.0465684	0.0209008	0.0193914	0.0310058	0.0118349	0.00752861	0.0113977	0.00541591	0.00904429		0.0008265	0.000886922	0.000611353	0.000637202	0.000740495	0.000286154	0.000232544	0.000358783	0.000319147	0.000299157
NM_178600	142	120	286	80	160	161.5	209	539	59	166	243.25		219	315	125	158	204.25	310	317	129	252	252						0.0214401	0.0303384	0.0107875	0.0226469	0.0213032	0.0215087	0.0180352	0.0117976	0.0115262	0.0157169		0.000316994	0.000399115	0.000261709	0.000205885	0.000295926	0.000349243	0.000249887	0.000296686	0.00026898	0.000291199
NM_011890	301	84	188	117	110	124.75	185	292	95	121	173.25		101	213	105	322	185.25	237	219	90	463	252.25						0.015008	0.0199427	0.0157767	0.0155697	0.0165743	0.0190388	0.00977046	0.0189962	0.00840161	0.0140518		0.000146194	0.000269878	0.000219836	0.000419589	0.000263874	0.000267002	0.000172635	0.00020699	0.000494198	0.000285206
NM_207652	1058	334	860	144	186	381	27	96	16	71	52.5		1844	1469	632	652	1149.25	132	347	68	464	252.75						0.0596748	0.0912273	0.0194175	0.026327	0.0491616	0.00277864	0.00321221	0.00319936	0.00492987	0.00353002		0.00266912	0.00186127	0.0013232	0.000849603	0.0016758	0.00014871	0.000273535	0.000156393	0.000495265	0.000268476
NM_176902	145	68	237	44	88	109.25	35	67	26	80	52		112	434	187	259	248	116	418	163	326	255.75						0.0121494	0.0251406	0.00593312	0.0124558	0.0139197	0.00360193	0.00224185	0.00519896	0.00555478	0.00414938		0.000162116	0.000549892	0.000391517	0.000337496	0.000360255	0.000130685	0.000329504	0.000374882	0.000347966	0.000295759
NM_011612	237	179	160	46	66	112.75	139	115	81	24	89.75		708	285	171	187	337.75	447	234	246	96	255.75						0.0319814	0.0169725	0.0062028	0.00934183	0.0161246	0.0143048	0.00384796	0.0161968	0.00166644	0.00900399		0.0010248	0.000361104	0.000358018	0.000243675	0.0004969	0.000503587	0.000184459	0.000565773	0.000102469	0.000339072
NM_001077509	237	179	160	46	66	112.75	139	115	81	24	89.75		708	285	171	187	337.75	447	234	246	96	255.75						0.0319814	0.0169725	0.0062028	0.00934183	0.0161246	0.0143048	0.00384796	0.0161968	0.00166644	0.00900399		0.0010248	0.000361104	0.000358018	0.000243675	0.0004969	0.000503587	0.000184459	0.000565773	0.000102469	0.000339072
NM_153587	844	180	350	145	75	187.5	177	90	50	62	94.75		1150	1834	375	511	967.5	439	167	88	329	255.75						0.0321601	0.0371274	0.0195523	0.0106157	0.0248639	0.0182155	0.00301144	0.009998	0.00430496	0.00888248		0.00166458	0.00232374	0.000785128	0.00066587	0.00135983	0.000494574	0.000131644	0.000202391	0.000351169	0.000294944
NM_001205095	642	89	146	115	79	107.25	173	267	75	84	149.75		81	243	20	315	164.75	151	537	29	310	256.75						0.0159014	0.0154874	0.015507	0.0111819	0.0145194	0.0178038	0.00893395	0.014997	0.00583252	0.0118918		0.000117244	0.000307889	4.18735e-05	0.000410468	0.000219369	0.000170115	0.00042331	6.66969e-05	0.000330888	0.000247753
NM_001110266	118	170	170	69	92	125.25	287	207	38	100	158		177	233	64	114	147	507	261	63	200	257.75						0.0303734	0.0180333	0.00930421	0.0130219	0.0176832	0.0295359	0.00692632	0.00759848	0.00694348	0.012751		0.000256201	0.000295218	0.000133995	0.00014855	0.000208491	0.000571182	0.000205743	0.000144893	0.000213476	0.000283824
NM_001099674	78	126	367	126	291	227.5	242	954	114	525	458.75		160	159	102	220	160.25	212	459	135	226	258						0.0225121	0.0389307	0.0169903	0.041189	0.0299055	0.0249048	0.0319213	0.0227954	0.0364533	0.0290187		0.000231594	0.000201458	0.000213555	0.000286676	0.000233321	0.000238837	0.000361823	0.000310485	0.000241228	0.000288094
NM_001025594	448	71	206	98	78	113.25	67	122	32	54	68.75		362	668	300	404	433.5	285	360	97	290	258						0.0126854	0.0218521	0.0132147	0.0110403	0.0146981	0.00689513	0.00408218	0.00639872	0.00374948	0.00528138		0.000523981	0.000846377	0.000628103	0.000526441	0.000631226	0.000321079	0.000283783	0.00022309	0.000309541	0.000284373
NM_026772	195	197	908	183	214	375.5	74	360	107	129	167.5		344	1182	368	508	600.5	150	371	207	306	258.5						0.0351974	0.0963191	0.0246764	0.0302902	0.0466208	0.00761552	0.0120458	0.0213957	0.00895709	0.0125035		0.000497927	0.00149763	0.000770472	0.000661961	0.000856998	0.000168989	0.000292454	0.000476078	0.000326619	0.000316035
NM_023053	203	87	198	78	85	112	87	103	43	64	74.25		121	304	116	168	177.25	234	392	76	335	259.25						0.015544	0.0210035	0.0105178	0.0120311	0.0147741	0.00895338	0.00344643	0.00859828	0.00444383	0.00636048		0.000175143	0.000385178	0.000242866	0.000218916	0.000255526	0.000263622	0.000309008	0.000174792	0.000357573	0.000276249
NM_198169	511	285	523	262	200	317.5	85	241	62	80	117		1181	1493	497	609	945	201	373	102	366	260.5						0.0509201	0.0554789	0.035329	0.0283086	0.0425092	0.00874756	0.00806398	0.0123975	0.00555478	0.00869096		0.00170945	0.00189168	0.00104056	0.000793571	0.00135881	0.000226445	0.000294031	0.000234589	0.000390662	0.000286432
NM_011076	1257	105	171	154	113	135.75	150	310	84	107	162.75		262	255	333	145	248.75	315	401	148	190	263.5						0.0187601	0.0181394	0.0207659	0.0159943	0.0184149	0.0154369	0.0103727	0.0167966	0.00742952	0.0125089		0.000379235	0.000323093	0.000697194	0.000188946	0.000397117	0.000354876	0.000316103	0.000340384	0.000202803	0.000303541
NM_019716	243	72	155	93	93	103.25	176	371	57	162	191.5		179	291	118	273	215.25	205	371	104	377	264.25						0.012864	0.0164421	0.0125405	0.0131635	0.0137525	0.0181126	0.0124138	0.0113977	0.0112484	0.0132931		0.000259095	0.000368706	0.000247054	0.000355739	0.000307649	0.000230951	0.000292454	0.000239189	0.000402403	0.000291249
NM_009183	340	247	412	181	185	256.25	198	378	232	156	241		362	675	119	538	423.5	201	394	114	351	265						0.0441308	0.0437043	0.0244067	0.0261854	0.0346068	0.0203767	0.0126481	0.0463907	0.0108318	0.0225618		0.000523981	0.000855247	0.000249147	0.000701053	0.000582357	0.000226445	0.000310585	0.000262188	0.000374651	0.000293467
NM_009366	124	444	1067	200	275	496.5	10	69	16	71	41.5		4604	2239	1478	1119	2360	163	262	142	495	265.5						0.0793282	0.113186	0.0269687	0.0389243	0.0646017	0.00102912	0.00230877	0.00319936	0.00492987	0.00286678		0.00666411	0.00283688	0.00309445	0.00145814	0.0035134	0.000183634	0.000206531	0.000326585	0.000528354	0.000311276
NM_024236	222	145	238	125	221	182.25	298	738	104	317	364.25		123	226	145	242	184	302	286	125	350	265.75						0.0259067	0.0252466	0.0168554	0.031281	0.0248224	0.0306679	0.0246938	0.0207958	0.0220108	0.0245421		0.000178038	0.000286349	0.000303583	0.000315344	0.000270828	0.000340231	0.00022545	0.000287487	0.000373584	0.000306688
NM_033563	282	90	200	161	102	138.25	108	157	114	103	120.5		366	384	230	318	324.5	324	356	135	254	267.25						0.01608	0.0212157	0.0217098	0.0144374	0.0183607	0.0111145	0.0052533	0.0227954	0.00715178	0.0115788		0.000529771	0.00048654	0.000481545	0.000414377	0.000478058	0.000365016	0.00028063	0.000310485	0.000271115	0.000306811
NM_027947	485	72	211	98	79	115	67	127	32	56	70.5		392	717	310	440	464.75	298	367	97	307	267.25						0.012864	0.0223825	0.0132147	0.0111819	0.0149108	0.00689513	0.00424948	0.00639872	0.00388835	0.00535792		0.000567405	0.000908462	0.000649039	0.000573352	0.000674564	0.000335724	0.000289301	0.00022309	0.000327686	0.00029395
NM_001083937	371	97	181	84	124	121.5	191	423	89	204	226.75		132	237	260	186	203.75	259	353	171	291	268.5						0.0173307	0.0192002	0.0113269	0.0175513	0.0163523	0.0196563	0.0141538	0.0177964	0.0141647	0.0164428		0.000191065	0.000300287	0.000544356	0.000242371	0.00031952	0.000291787	0.000278265	0.000393282	0.000310608	0.000318485
NM_001163241	212	81	158	99	157	123.75	207	447	54	225	233.25		169	256	187	363	243.75	318	231	175	353	269.25						0.014472	0.0167604	0.0133495	0.0222222	0.016701	0.0213029	0.0149568	0.0107978	0.0156228	0.0156701		0.000244621	0.00032436	0.000391517	0.000473015	0.000358378	0.000358256	0.000182094	0.000402481	0.000376786	0.000329904
NM_001163242	212	81	158	99	157	123.75	207	447	54	225	233.25		169	256	187	363	243.75	318	231	175	353	269.25						0.014472	0.0167604	0.0133495	0.0222222	0.016701	0.0213029	0.0149568	0.0107978	0.0156228	0.0156701		0.000244621	0.00032436	0.000391517	0.000473015	0.000358378	0.000358256	0.000182094	0.000402481	0.000376786	0.000329904
NM_020282	212	81	158	99	157	123.75	207	447	54	225	233.25		169	256	187	363	243.75	318	231	175	353	269.25						0.014472	0.0167604	0.0133495	0.0222222	0.016701	0.0213029	0.0149568	0.0107978	0.0156228	0.0156701		0.000244621	0.00032436	0.000391517	0.000473015	0.000358378	0.000358256	0.000182094	0.000402481	0.000376786	0.000329904
NM_001160236	182	93	399	104	146	185.5	89	146	29	124	97		148	500	122	341	277.75	189	392	95	401	269.25						0.016616	0.0423252	0.0140237	0.0206653	0.0234076	0.00915921	0.00488523	0.00579884	0.00860992	0.0071133		0.000214224	0.000633516	0.000255428	0.000444348	0.000386879	0.000212926	0.000309008	0.00021849	0.00042802	0.000292111
NM_078484	374	97	177	83	124	120.25	187	413	87	203	222.5		163	239	259	200	215.25	257	343	179	303	270.5						0.0173307	0.0187759	0.011192	0.0175513	0.0162125	0.0192446	0.0138192	0.0173965	0.0140953	0.0161389		0.000235936	0.000302821	0.000542262	0.000260615	0.000335408	0.000289534	0.000270382	0.000411681	0.000323417	0.000323753
NM_008057	553	53	280	93	110	134	85	208	34	121	112		155	536	129	428	312	169	303	59	551	270.5						0.00946936	0.0297019	0.0125405	0.0155697	0.0168204	0.00874756	0.00695978	0.00679864	0.00840161	0.0077269		0.000224356	0.000679129	0.000270084	0.000557715	0.000432821	0.000190394	0.000238851	0.000135694	0.000588127	0.000288266
NM_025987	112	131	405	152	201	222.25	241	675	82	325	330.75		133	242	94	159	157	149	533	165	247	273.5						0.0234054	0.0429617	0.0204962	0.0284501	0.0288284	0.0248019	0.0225858	0.0163967	0.0225663	0.0215877		0.000192512	0.000306622	0.000196805	0.000207189	0.000225782	0.000167862	0.000420156	0.000379482	0.000263643	0.000307786
NM_001110850	214	103	245	31	33	103	46	71	4	29	37.5		1065	1238	157	254	678.5	433	377	65	221	274						0.0184027	0.0259892	0.00418015	0.00467091	0.0133107	0.00473397	0.00237569	0.00079984	0.00201361	0.00248078		0.00154155	0.00156859	0.000328707	0.00033098	0.000942455	0.000487814	0.000297184	0.000149493	0.000235891	0.000292596
NM_025415	60	203	759	188	249	349.75	88	338	64	225	178.75		712	591	528	368	549.75	294	229	264	312	274.75						0.0362694	0.0805134	0.0253506	0.0352442	0.0443444	0.00905629	0.0113096	0.0127974	0.0156228	0.0121966		0.00103059	0.000748816	0.00110546	0.000479531	0.0008411	0.000331218	0.000180518	0.000607172	0.000333023	0.000362983
NM_207681	121	198	732	199	141	317.5	63	114	35	36	62		931	2182	415	727	1063.75	218	547	56	279	275						0.0353761	0.0776493	0.0268339	0.0199575	0.0399542	0.00648348	0.0038145	0.0069986	0.00249965	0.00494906		0.00134759	0.00276466	0.000868875	0.000947334	0.00148211	0.000245597	0.000431192	0.000128794	0.000297799	0.000275846
NM_011070	135	96	281	157	181	178.75	186	603	109	230	282		214	126	133	47	130	469	176	180	277	275.5						0.017152	0.029808	0.0211704	0.0256192	0.0234374	0.0191417	0.0201767	0.0217956	0.01597	0.019271		0.000309757	0.000159646	0.000278459	6.12444e-05	0.000202276	0.000528372	0.000138738	0.000413981	0.000295665	0.000344189
NM_019484	199	71	89	185	71	104	220	322	252	117	227.75		170	84	199	92	136.25	309	223	393	181	276.5						0.0126854	0.00944097	0.0249461	0.0100495	0.0142805	0.0226407	0.0107743	0.0503899	0.00812387	0.0229822		0.000246068	0.000106431	0.000416641	0.000119883	0.000222256	0.000348117	0.000175788	0.000903858	0.000193196	0.00040524
NM_001185182	108	71	213	116	132	133	163	402	83	239	221.75		207	220	103	169	174.75	199	399	130	383	277.75						0.0126854	0.0225947	0.0156419	0.0186837	0.0174014	0.0167747	0.0134511	0.0165967	0.0165949	0.0158544		0.000299624	0.000278747	0.000215649	0.000220219	0.00025356	0.000224192	0.000314526	0.000298986	0.000408807	0.000311628
NM_010385	108	71	213	116	132	133	163	402	83	239	221.75		207	220	103	169	174.75	199	399	130	383	277.75						0.0126854	0.0225947	0.0156419	0.0186837	0.0174014	0.0167747	0.0134511	0.0165967	0.0165949	0.0158544		0.000299624	0.000278747	0.000215649	0.000220219	0.00025356	0.000224192	0.000314526	0.000298986	0.000408807	0.000311628
NM_145512	140	85	188	93	75	110.25	114	188	28	108	109.5		133	510	123	287	263.25	108	445	80	479	278						0.0151867	0.0199427	0.0125405	0.0106157	0.0145714	0.011732	0.00629057	0.00559888	0.00749896	0.00778011		0.000192512	0.000646186	0.000257522	0.000373982	0.000367551	0.000121672	0.000350787	0.000183991	0.000511276	0.000291932
NM_019568	80	168	493	148	277	271.5	379	766	76	389	402.5		115	185	45	238	145.75	303	392	86	335	279						0.0300161	0.0522966	0.0199569	0.0392074	0.0353692	0.0390038	0.0256307	0.015197	0.0270101	0.0267104		0.000166458	0.000234401	9.42154e-05	0.000310131	0.000201301	0.000341357	0.000309008	0.000197791	0.000357573	0.000301432
NM_001111062	246	97	192	123	161	143.25	288	456	76	253	268.25		133	313	164	274	221	283	347	106	381	279.25						0.0173307	0.020367	0.0165858	0.0227884	0.019268	0.0296388	0.015258	0.015197	0.017567	0.0194152		0.000192512	0.000396581	0.000343363	0.000357042	0.000322374	0.000318825	0.000273535	0.000243789	0.000406672	0.000310705
NM_001111063	246	97	192	123	161	143.25	288	456	76	253	268.25		133	313	164	274	221	283	347	106	381	279.25						0.0173307	0.020367	0.0165858	0.0227884	0.019268	0.0296388	0.015258	0.015197	0.017567	0.0194152		0.000192512	0.000396581	0.000343363	0.000357042	0.000322374	0.000318825	0.000273535	0.000243789	0.000406672	0.000310705
NM_007744	246	97	192	123	161	143.25	288	456	76	253	268.25		133	313	164	274	221	283	347	106	381	279.25						0.0173307	0.020367	0.0165858	0.0227884	0.019268	0.0296388	0.015258	0.015197	0.017567	0.0194152		0.000192512	0.000396581	0.000343363	0.000357042	0.000322374	0.000318825	0.000273535	0.000243789	0.000406672	0.000310705
NM_010559	441	302	571	382	257	378	297	408	132	186	255.75		292	550	123	467	358	289	247	79	504	279.75						0.0539575	0.0605707	0.0515102	0.0363765	0.0506037	0.030565	0.0136519	0.0263947	0.0129149	0.0208816		0.000422659	0.000696868	0.000257522	0.000608535	0.000496396	0.000325585	0.000194707	0.000181691	0.00053796	0.000309986
NM_021284	169	92	185	91	45	103.25	76	78	25	57	59		216	471	132	170	247.25	311	362	52	395	280						0.0164374	0.0196245	0.0122708	0.00636943	0.0136755	0.00782134	0.00260992	0.004999	0.00395778	0.00484701		0.000312652	0.000596772	0.000276365	0.000221522	0.000351828	0.00035037	0.00028536	0.000119594	0.000421616	0.000294235
NM_001253848	313	65	212	103	101	120.25	122	253	53	109	134.25		126	531	43	441	285.25	99	602	23	397	280.25						0.0116134	0.0224886	0.0138889	0.0142958	0.0155717	0.0125553	0.0084655	0.0105979	0.00756839	0.00979677		0.00018238	0.000672794	9.0028e-05	0.000574655	0.000379964	0.000111533	0.000474548	5.28975e-05	0.000423751	0.000265682
NM_013498	226	106	256	31	40	108.25	47	78	5	30	40		1063	1261	157	256	684.25	444	389	63	229	281.25						0.0189387	0.027156	0.00418015	0.00566171	0.0139842	0.00483688	0.00260992	0.0009998	0.00208304	0.00263241		0.00153865	0.00159773	0.000328707	0.000333587	0.000949668	0.000500207	0.000306643	0.000144893	0.00024443	0.000299043
NM_025593	48	40	293	35	132	125	128	671	38	204	260.25		267	68	170	119	156	264	458	208	196	281.5						0.00714669	0.0310809	0.00471953	0.0186837	0.0154077	0.0131728	0.022452	0.00759848	0.0141647	0.014347		0.000386472	8.61582e-05	0.000355925	0.000155066	0.000245905	0.00029742	0.000361035	0.000478378	0.000209207	0.00033651
NM_001128601	184	88	232	130	120	142.5	204	418	111	220	238.25		160	289	186	241	219	164	389	268	307	282						0.0157227	0.0246102	0.0175297	0.0169851	0.0187119	0.0209941	0.0139865	0.0221956	0.0152757	0.018113		0.000231594	0.000366172	0.000389424	0.00031404	0.000325308	0.000184761	0.000306643	0.000616371	0.000327686	0.000358865
NM_011170	235	84	186	98	122	122.5	124	350	38	142	163.5		271	276	225	235	251.75	308	337	160	325	282.5						0.015008	0.0197306	0.0132147	0.0172682	0.0163054	0.0127611	0.0117112	0.00759848	0.00985974	0.0104826		0.000392262	0.000349701	0.000471077	0.000306222	0.000379815	0.00034699	0.000265652	0.000367983	0.000346899	0.000331881
NM_001159711	123	48	174	75	110	101.75	97	291	61	112	140.25		259	311	195	369	283.5	204	503	196	228	282.75						0.00857602	0.0184576	0.0101133	0.0155697	0.0131792	0.0099825	0.009737	0.0121976	0.0077767	0.00992344		0.000374892	0.000394047	0.000408267	0.000480834	0.00041451	0.000229825	0.000396508	0.000450779	0.000243363	0.000330119
NM_001110856	275	108	257	31	41	109.25	47	83	5	30	41.25		1046	1277	165	260	687	441	408	58	228	283.75						0.0192961	0.0272621	0.00418015	0.00580326	0.0141354	0.00483688	0.00277722	0.0009998	0.00208304	0.00267424		0.00151404	0.001618	0.000345456	0.000338799	0.000954075	0.000496827	0.000321621	0.000133394	0.000243363	0.000298801
NM_009606	358	3966	11717	5229	14304	8804	11460	33989	5572	18603	17406		363	2	458	4	206.75	615	3	522	1	285.25						0.708594	1.24292	0.705097	2.02463	1.17031	1.17938	1.13729	1.11418	1.2917	1.18063		0.000525428	2.53406e-06	0.000958903	5.21229e-06	0.000373019	0.000692854	2.36486e-06	0.00120054	1.06738e-06	0.000474207
NM_001253716	172	90	148	96	107	110.25	224	252	62	170	177		127	247	160	234	192	293	354	179	317	285.75						0.01608	0.0156996	0.012945	0.0151451	0.0149674	0.0230524	0.00843204	0.0123975	0.0118039	0.0139215		0.000183828	0.000312957	0.000334988	0.000304919	0.000284173	0.000330091	0.000279053	0.000411681	0.00033836	0.000339796
NM_010118	451	214	721	143	485	390.75	19	520	14	324	219.25		396	1417	109	1577	874.75	14	587	10	533	286						0.0382348	0.0764824	0.0192826	0.0686483	0.050662	0.00195534	0.0173995	0.00279944	0.0224969	0.0111628		0.000573194	0.00179538	0.000228211	0.00205495	0.00116293	1.57723e-05	0.000462724	2.29989e-05	0.000568914	0.000267602
NM_026994	314	58	142	94	135	107.25	137	470	79	160	211.5		104	257	94	317	193	175	461	114	399	287.25						0.0103627	0.0150631	0.0126753	0.0191083	0.0143023	0.014099	0.0157264	0.0157968	0.0111096	0.014183		0.000150536	0.000325627	0.000196805	0.000413074	0.000271511	0.000197154	0.0003634	0.000262188	0.000425885	0.000312157
NM_175164	795	165	113	98	59	108.75	200	43	114	17	93.5		660	456	205	475	449	592	121	264	173	287.5						0.0294801	0.0119868	0.0132147	0.00835103	0.0157582	0.0205825	0.0014388	0.0227954	0.00118039	0.0114993		0.000955324	0.000577767	0.000429203	0.000618959	0.000645313	0.000666942	9.53826e-05	0.000607172	0.000184657	0.000388538
NM_178661	502	93	150	108	125	119	187	207	42	214	162.5		149	311	47	484	247.75	288	355	31	480	288.5						0.016616	0.0159117	0.0145631	0.0176929	0.0161959	0.0192446	0.00692632	0.00839832	0.014859	0.0123571		0.000215672	0.000394047	9.84027e-05	0.000630687	0.000334702	0.000324458	0.000279842	7.12967e-05	0.000512343	0.000296985
NM_148932	1181	107	278	146	122	163.25	193	316	78	109	174		151	545	39	436	292.75	150	273	35	698	289						0.0191174	0.0294898	0.0196872	0.0172682	0.0213906	0.0198621	0.0105735	0.0155969	0.00756839	0.0134002		0.000218567	0.000690532	8.16533e-05	0.00056814	0.000389723	0.000168989	0.000215202	8.04962e-05	0.000745032	0.00030243
NM_027244	124	122	342	129	302	223.75	297	976	104	445	455.5		100	169	142	138	137.25	291	392	199	275	289.25						0.0217974	0.0362788	0.0173948	0.0427459	0.0295542	0.030565	0.0326574	0.0207958	0.0308985	0.0287292		0.000144746	0.000214128	0.000297302	0.000179824	0.000209	0.000327838	0.000309008	0.000457679	0.00029353	0.000347014
NM_026532	108	207	602	253	346	352	517	1041	186	489	558.25		84	285	163	283	203.75	165	443	120	433	290.25						0.0369841	0.0638591	0.0341154	0.0489738	0.0459831	0.0532057	0.0348324	0.0371926	0.0339536	0.0397961		0.000121587	0.000361104	0.000341269	0.00036877	0.000298182	0.000185888	0.000349211	0.000275987	0.000462176	0.000318315
NM_007836	146	373	1318	677	464	708	34	132	70	46	70.5		1465	3054	1034	1275	1707	205	334	297	325	290.25						0.0666428	0.139811	0.0912891	0.0656759	0.0908547	0.00349902	0.00441678	0.0139972	0.003194	0.00627675		0.00212053	0.00386952	0.00216486	0.00166142	0.00245408	0.000230951	0.000263288	0.000683068	0.000346899	0.000381051
NM_025947	77	113	627	233	471	361	310	1241	153	509	553.25		81	343	98	373	223.75	231	494	95	346	291.5						0.0201894	0.0665111	0.0314186	0.0666667	0.0461964	0.0319029	0.0415245	0.0305939	0.0353423	0.0348409		0.000117244	0.000434592	0.00020518	0.000486046	0.000310766	0.000260243	0.000389413	0.00021849	0.000369314	0.000309365
NM_028881	673	100	453	85	125	190.75	72	138	31	56	74.25		215	1026	99	562	475.5	132	520	45	469	291.5						0.0178667	0.0480535	0.0114617	0.0176929	0.0237687	0.00740969	0.00461755	0.00619876	0.00388835	0.00552859		0.000311204	0.00129997	0.000207274	0.000732327	0.000637695	0.00014871	0.000409909	0.000103495	0.000500602	0.000290679
NM_078479	68	50	217	47	141	113.75	120	500	42	190	213		200	117	273	107	174.25	376	356	214	221	291.75						0.00893336	0.023019	0.00633765	0.0199575	0.0145619	0.0123495	0.0167302	0.00839832	0.0131926	0.0126677		0.000289492	0.000148243	0.000571573	0.000139429	0.000287184	0.000423598	0.00028063	0.000492177	0.000235891	0.000358074
NM_021559	349	60	166	98	89	103.25	151	287	83	132	163.25		124	408	76	372	245	258	466	97	348	292.25						0.01072	0.017609	0.0132147	0.0125973	0.0135353	0.0155398	0.00960316	0.0165967	0.00916539	0.0127263		0.000179485	0.000516949	0.000159119	0.000484743	0.000335074	0.000290661	0.000367341	0.00022309	0.000371449	0.000313135
NM_001122780	570	192	552	157	181	270.5	87	183	49	75	98.5		916	1041	396	817	792.5	247	371	136	416	292.5						0.0343041	0.0585552	0.0211704	0.0256192	0.0349122	0.00895338	0.00612327	0.00979804	0.00520761	0.00752057		0.00132587	0.00131898	0.000829095	0.00106461	0.00113464	0.000278268	0.000292454	0.000312785	0.000444031	0.000331885
NM_029652	570	192	552	157	181	270.5	87	183	49	75	98.5		916	1041	396	817	792.5	247	371	136	416	292.5						0.0343041	0.0585552	0.0211704	0.0256192	0.0349122	0.00895338	0.00612327	0.00979804	0.00520761	0.00752057		0.00132587	0.00131898	0.000829095	0.00106461	0.00113464	0.000278268	0.000292454	0.000312785	0.000444031	0.000331885
NM_018798	619	138	316	243	348	261.25	576	1125	213	605	629.75		80	168	55	263	141.5	241	294	64	574	293.25						0.0246561	0.0335207	0.032767	0.0492569	0.0350502	0.0592776	0.037643	0.0425915	0.0420081	0.04538		0.000115797	0.000212861	0.000115152	0.000342708	0.00019663	0.000271509	0.000231756	0.000147193	0.000612677	0.000315784
NM_182782	570	192	552	157	181	270.5	87	183	49	75	98.5		896	1006	393	757	763	253	372	136	413	293.5						0.0343041	0.0585552	0.0211704	0.0256192	0.0349122	0.00895338	0.00612327	0.00979804	0.00520761	0.00752057		0.00129692	0.00127463	0.000822814	0.000986426	0.0010952	0.000285028	0.000293242	0.000312785	0.000440829	0.000332971
NM_181392	52	67	199	101	166	133.25	113	410	44	169	184		148	172	170	147	159.25	275	357	228	319	294.75						0.0119707	0.0211096	0.0136192	0.0234961	0.0175489	0.0116291	0.0137188	0.00879824	0.0117345	0.0114702		0.000214224	0.00021793	0.000355925	0.000191552	0.000244908	0.000309813	0.000281418	0.000524375	0.000340495	0.000364025
NM_001160235	187	89	429	105	143	191.5	88	150	25	130	98.25		142	487	137	375	285.25	205	418	113	446	295.5						0.0159014	0.0455076	0.0141586	0.0202406	0.023952	0.00905629	0.00501907	0.004999	0.00902652	0.00702522		0.000205539	0.000617045	0.000286834	0.000488652	0.000399517	0.000230951	0.000329504	0.000259888	0.000476052	0.000324099
NM_001166544	87	202	842	199	406	412.25	310	1508	117	572	626.75		155	345	135	172	201.75	330	487	83	283	295.75						0.0360908	0.0893179	0.0268339	0.0574664	0.0524272	0.0319029	0.0504584	0.0233953	0.0397167	0.0363683		0.000224356	0.000437126	0.000282646	0.000224128	0.000292064	0.000371775	0.000383895	0.000190891	0.000302069	0.000312158
NM_001166543	87	202	842	199	406	412.25	310	1508	117	572	626.75		155	345	135	172	201.75	330	487	83	283	295.75						0.0360908	0.0893179	0.0268339	0.0574664	0.0524272	0.0319029	0.0504584	0.0233953	0.0397167	0.0363683		0.000224356	0.000437126	0.000282646	0.000224128	0.000292064	0.000371775	0.000383895	0.000190891	0.000302069	0.000312158
NM_001252451	211	129	231	144	98	150.5	107	206	70	77	115		400	436	353	393	395.5	316	303	244	328	297.75						0.0230481	0.0245041	0.0194175	0.0138712	0.0202102	0.0110116	0.00689286	0.0139972	0.00534648	0.00931204		0.000578984	0.000552426	0.000739067	0.000512107	0.000595646	0.000356003	0.000238851	0.000561174	0.000350101	0.000376532
NM_207680	177	244	855	235	168	375.5	77	139	39	47	75.5		944	2517	440	825	1181.5	223	589	71	308	297.75						0.0435948	0.0906969	0.0316882	0.0237792	0.0474398	0.00792426	0.00465101	0.00779844	0.00326344	0.00590928		0.0013664	0.00318912	0.000921217	0.00107503	0.00163794	0.00025123	0.0004643	0.000163292	0.000328754	0.000301894
NM_009459	164	176	599	166	170	277.75	142	302	69	115	157		605	1105	265	467	610.5	304	438	91	359	298						0.0314454	0.0635409	0.022384	0.0240623	0.0353582	0.0146136	0.0101051	0.0137972	0.007985	0.0116252		0.000875714	0.00140007	0.000554824	0.000608535	0.000859786	0.000342484	0.000345269	0.00020929	0.00038319	0.000320058
NM_010548	159	11692	12477	3710	2526	7601.25	122	241	198	113	168.5		34043	26503	11370	8725	20160.2	163	300	500	230	298.25						2.08898	1.32354	0.50027	0.357537	1.06758	0.0125553	0.00806398	0.0395921	0.00784613	0.0170144		0.0492759	0.0335802	0.0238051	0.0113693	0.0295076	0.000183634	0.000236486	0.00114995	0.000245498	0.000453891
NM_145824	629	66	251	119	126	140.5	208	400	113	180	225.25		119	689	176	387	342.75	187	471	85	452	298.75						0.011792	0.0266256	0.0160464	0.0178344	0.0180746	0.0214058	0.0133842	0.0225955	0.0124983	0.0174709		0.000172248	0.000872985	0.000368487	0.000504289	0.000479502	0.000210673	0.000371283	0.000195491	0.000482457	0.000314976
NM_001113529	238	3188	6516	2372	1888	3491	108	269	87	88	138		11129	15233	5413	7837	9903	255	422	195	325	299.25						0.569591	0.691206	0.319849	0.267233	0.46197	0.0111145	0.00900087	0.0173965	0.00611026	0.0109055		0.0161088	0.0193007	0.0113331	0.0102122	0.0142387	0.000287281	0.000332657	0.000448479	0.000346899	0.000353829
NM_013602	42	883	3172	422	1068	1386.25	777	2773	354	1012	1229		589	404	293	230	379	393	288	383	134	299.5						0.157763	0.33648	0.056904	0.151168	0.175579	0.079963	0.0927859	0.0707858	0.070268	0.0784507		0.000852554	0.000511881	0.000613447	0.000299707	0.000569397	0.000442751	0.000227026	0.000880859	0.000143029	0.000423416
NM_010336	345	74	185	115	53	106.75	42	74	51	20	46.75		445	850	342	439	519	187	591	233	188	299.75						0.0132214	0.0196245	0.015507	0.00750177	0.0139637	0.00432232	0.00247608	0.010198	0.0013887	0.00459626		0.00064412	0.00107698	0.000716037	0.000572049	0.000752296	0.000210673	0.000465877	0.000535875	0.000200668	0.000353273
NM_172989	345	74	185	115	53	106.75	42	74	51	20	46.75		445	850	342	439	519	187	591	233	188	299.75						0.0132214	0.0196245	0.015507	0.00750177	0.0139637	0.00432232	0.00247608	0.010198	0.0013887	0.00459626		0.00064412	0.00107698	0.000716037	0.000572049	0.000752296	0.000210673	0.000465877	0.000535875	0.000200668	0.000353273
NM_026424	173	221	390	119	187	229.25	127	455	89	159	207.5		345	813	202	615	493.75	175	600	102	323	300						0.0394854	0.0413705	0.0160464	0.0264685	0.0308427	0.0130699	0.0152245	0.0177964	0.0110401	0.0142827		0.000499374	0.0010301	0.000422922	0.00080139	0.000688446	0.000197154	0.000472972	0.000234589	0.000344764	0.00031237
NM_026902	162	132	248	144	245	192.25	359	873	153	386	442.75		107	187	64	345	175.75	204	532	90	385	302.75						0.0235841	0.0263074	0.0194175	0.034678	0.0259967	0.0369456	0.029211	0.0305939	0.0268018	0.0308881		0.000154878	0.000236935	0.000133995	0.00044956	0.000243842	0.000229825	0.000419368	0.00020699	0.000410942	0.000316781
NM_001163608	488	77	318	94	126	153.75	158	447	47	213	216.25		59	366	58	290	193.25	174	382	43	612	302.75						0.0137574	0.0337329	0.0126753	0.0178344	0.0195	0.0162602	0.0149568	0.00939812	0.0147896	0.0138512		8.54002e-05	0.000463734	0.000121433	0.000377891	0.000262115	0.000196027	0.000301125	9.88954e-05	0.000653238	0.000312321
NM_001037726	268	69	386	131	85	167.75	100	189	47	87	105.75		217	571	137	481	351.5	257	512	51	392	303						0.012328	0.0409462	0.0176645	0.0120311	0.0207425	0.0102912	0.00632403	0.00939812	0.00604083	0.00801356		0.000314099	0.000723475	0.000286834	0.000626778	0.000487796	0.000289534	0.000403602	0.000117294	0.000418414	0.000307211
NM_010444	582	1006	483	289	141	479.75	58	217	59	24	89.5		5753	2944	809	923	2607.25	203	758	130	127	304.5						0.179739	0.0512358	0.0389698	0.0199575	0.0724756	0.00596892	0.00726092	0.0117976	0.00166644	0.00667348		0.00832724	0.00373014	0.00169378	0.00120274	0.00373848	0.000228698	0.000597521	0.000298986	0.000135557	0.000315191
NM_001195390	110	91	153	116	93	113.25	189	193	80	90	138		144	199	141	191	168.75	331	428	120	344	305.75						0.0162587	0.01623	0.0156419	0.0131635	0.0153235	0.0194504	0.00645787	0.0159968	0.00624913	0.0120386		0.000208434	0.000252139	0.000295208	0.000248887	0.000251167	0.000372902	0.000337386	0.000275987	0.000367179	0.000338364
NM_019443	51	103	358	121	242	206	181	693	65	226	291.25		322	115	263	225	231.25	454	188	409	172	305.75						0.0184027	0.037976	0.0163161	0.0342534	0.026737	0.0186271	0.0231881	0.0129974	0.0156923	0.0176262		0.000466082	0.000145709	0.000550637	0.000293191	0.000363905	0.000511473	0.000148198	0.000940656	0.00018359	0.000445979
NM_207105	246	141	179	81	117	129.5	154	200	119	64	134.25		581	171	320	191	315.75	320	388	342	175	306.25						0.0251921	0.018988	0.0109223	0.0165605	0.0179157	0.0158485	0.0066921	0.0237952	0.00444383	0.0126949		0.000840975	0.000216662	0.000669976	0.000248887	0.000494125	0.000360509	0.000305855	0.000786563	0.000186792	0.00040993
NM_013585	200	138	180	132	182	158	353	547	108	199	301.75		247	204	238	250	234.75	345	293	206	382	306.5						0.0246561	0.0190941	0.0177994	0.0257608	0.0218276	0.0363281	0.0183029	0.0215957	0.0138175	0.022511		0.000357523	0.000258475	0.000498295	0.000325768	0.000360015	0.000388674	0.000230968	0.000473778	0.00040774	0.00037529
NM_020001	190	90	80	158	99	106.75	156	183	132	122	148.25		279	261	642	342	381	307	157	559	203	306.5						0.01608	0.00848626	0.0213053	0.0140127	0.0149711	0.0160543	0.00612327	0.0263947	0.00847105	0.0142608		0.000403842	0.000330695	0.00134414	0.000445651	0.000631082	0.000345864	0.000123761	0.00128564	0.000216678	0.000492986
NM_183358	203	88	202	107	118	128.75	247	580	89	203	279.75		121	140	213	119	148.25	280	416	195	338	307.25						0.0157227	0.0214278	0.0144283	0.0167021	0.0170702	0.0254194	0.0194071	0.0177964	0.0140953	0.0191795		0.000175143	0.000177384	0.000445953	0.000155066	0.000238386	0.000315446	0.000327927	0.000448479	0.000360775	0.000363157
NM_028199	481	77	318	95	127	154.25	160	451	47	214	218		59	376	58	302	198.75	176	382	43	635	309						0.0137574	0.0337329	0.0128101	0.0179759	0.0195691	0.016466	0.0150907	0.00939812	0.014859	0.0139535		8.54002e-05	0.000476404	0.000121433	0.000393528	0.000269191	0.00019828	0.000301125	9.88954e-05	0.000677787	0.000319022
NM_009256	355	79	148	73	113	103.25	233	664	63	186	286.5		112	227	104	255	174.5	300	540	92	309	310.25						0.0141147	0.0156996	0.00984358	0.0159943	0.0139131	0.0239786	0.0222178	0.0125975	0.0129149	0.0179272		0.000162116	0.000287616	0.000217742	0.000332283	0.000249939	0.000337978	0.000425674	0.00021159	0.000329821	0.000326266
NM_001035122	374	68	162	141	61	108	160	191	76	76	125.75		279	265	239	138	230.25	326	405	174	336	310.25						0.0121494	0.0171847	0.0190129	0.00863411	0.0142453	0.016466	0.00639095	0.015197	0.00527704	0.0108327		0.000403842	0.000335764	0.000500388	0.000179824	0.000354954	0.000367269	0.000319256	0.000400181	0.00035864	0.000361337
NM_027307	374	68	162	141	61	108	160	191	76	76	125.75		279	265	239	138	230.25	326	405	174	336	310.25						0.0121494	0.0171847	0.0190129	0.00863411	0.0142453	0.016466	0.00639095	0.015197	0.00527704	0.0108327		0.000403842	0.000335764	0.000500388	0.000179824	0.000354954	0.000367269	0.000319256	0.000400181	0.00035864	0.000361337
NM_134023	481	71	270	78	79	124.5	123	173	37	62	98.75		650	638	358	396	510.5	423	319	195	314	312.75						0.0126854	0.0286411	0.0105178	0.0111819	0.0157565	0.0126582	0.00578866	0.00739852	0.00430496	0.00753759		0.00094085	0.000808366	0.000749536	0.000516017	0.000753692	0.000476548	0.000251463	0.000448479	0.000335158	0.000377912
NM_028047	501	120	232	129	211	173	216	471	85	229	250.25		365	245	195	306	277.75	319	380	162	397	314.5						0.0214401	0.0246102	0.0173948	0.0298655	0.0233276	0.0222291	0.0157599	0.0169966	0.0159006	0.0177215		0.000528323	0.000310423	0.000408267	0.00039874	0.000411438	0.000359383	0.000299549	0.000372583	0.000423751	0.000363816
NM_026829	184	101	233	129	130	148.25	207	403	122	224	239		189	314	294	270	266.75	199	396	347	320	315.5						0.0180454	0.0247162	0.0173948	0.0184006	0.0196393	0.0213029	0.0134846	0.0243951	0.0155534	0.018684		0.00027357	0.000397848	0.000615541	0.00035183	0.000409697	0.000224192	0.000312161	0.000798063	0.000341562	0.000418994
NM_020507	326	242	311	112	111	194	188	288	80	136	173		826	721	108	372	506.75	370	388	53	453	316						0.0432374	0.0329903	0.0151025	0.0157113	0.0267604	0.0193475	0.00963662	0.0159968	0.00944313	0.013606		0.0011956	0.00091353	0.000226117	0.000484743	0.000704998	0.000416839	0.000305855	0.000121894	0.000483524	0.000332028
NM_019735	222	76	179	101	117	118.25	195	475	77	209	239		185	233	195	265	219.5	303	386	187	390	316.5						0.0135787	0.018988	0.0136192	0.0165605	0.0156866	0.0200679	0.0158937	0.0153969	0.0145119	0.0164676		0.00026778	0.000295218	0.000408267	0.000345314	0.000329145	0.000341357	0.000304278	0.00043008	0.000416279	0.000372999
NM_145939	419	70	189	96	149	126	144	446	74	169	208.25		177	404	238	269	272	305	422	142	397	316.5						0.0125067	0.0200488	0.012945	0.0210899	0.0166476	0.0148194	0.0149234	0.014797	0.0117345	0.0140686		0.000256201	0.000511881	0.000498295	0.000350527	0.000404226	0.00034361	0.000332657	0.000326585	0.000423751	0.000356651
NM_001085518	641	152	214	332	331	257.25	135	690	314	195	333.5		455	212	731	620	504.5	214	308	609	143	318.5						0.0271574	0.0227008	0.0447681	0.0468507	0.0353692	0.0138932	0.0230877	0.0627874	0.0135398	0.028327		0.000658595	0.000268611	0.00153048	0.000807905	0.000816397	0.000241091	0.000242792	0.00140063	0.000152636	0.000509288
NM_001198561	196	2798	4237	1576	1018	2407.25	2120	3376	847	865	1802		2218	1178	602	396	1098.5	615	215	264	180	318.5						0.499911	0.449454	0.212513	0.144091	0.326492	0.218174	0.112963	0.169366	0.0600611	0.140141		0.00321047	0.00149256	0.00126039	0.000516017	0.00161986	0.000692854	0.000169482	0.000607172	0.000192129	0.000415409
NM_026322	214	100	176	102	134	128	242	307	67	209	206.25		148	277	184	253	215.5	335	383	204	357	319.75						0.0178667	0.0186698	0.013754	0.0189667	0.0173143	0.0249048	0.0102724	0.0133973	0.0145119	0.0157716		0.000214224	0.000350968	0.000385236	0.000329677	0.000320026	0.000377408	0.000301914	0.000469178	0.000381055	0.000382389
NM_001253712	214	100	176	102	134	128	242	307	67	209	206.25		148	277	184	253	215.5	335	383	204	357	319.75						0.0178667	0.0186698	0.013754	0.0189667	0.0173143	0.0249048	0.0102724	0.0133973	0.0145119	0.0157716		0.000214224	0.000350968	0.000385236	0.000329677	0.000320026	0.000377408	0.000301914	0.000469178	0.000381055	0.000382389
NM_174997	175	96	444	112	145	199.25	93	151	30	134	102		152	552	141	402	311.75	236	469	119	457	320.25						0.017152	0.0470988	0.0151025	0.0205237	0.0249692	0.00957086	0.00505253	0.0059988	0.00930426	0.00748161		0.000220014	0.000699402	0.000295208	0.000523835	0.000434615	0.000265876	0.000369706	0.000273687	0.000487793	0.000349266
NM_010499	202	841	1398	499	602	835	100	432	88	164	196		2952	1446	1174	901	1618.25	225	406	291	363	321.25						0.150259	0.148297	0.0672869	0.0852088	0.112763	0.0102912	0.0144549	0.0175965	0.0113873	0.0134325		0.0042729	0.00183213	0.00245797	0.00117407	0.00243427	0.000253483	0.000320044	0.000669269	0.00038746	0.000407564
NM_181282	226	116	151	189	171	156.75	269	559	130	214	293		101	280	77	337	198.75	215	531	116	424	321.5						0.0207254	0.0160178	0.0254854	0.0242038	0.0216081	0.0276834	0.0187044	0.0259948	0.014859	0.0218104		0.000146194	0.000354769	0.000161213	0.000439135	0.000275328	0.000242217	0.00041858	0.000266787	0.00045257	0.000345039
NM_145823	249	209	181	53	100	135.75	456	137	30	116	184.75		286	399	44	215	236	646	228	29	383	321.5						0.0373414	0.0192002	0.00714671	0.0141543	0.0194606	0.0469281	0.00458409	0.0059988	0.00805444	0.0163913		0.000413974	0.000505546	9.21217e-05	0.000280161	0.00032295	0.000727778	0.000179729	6.66969e-05	0.000408807	0.000345753
NM_001080941	466	138	256	113	157	166	78	172	55	119	106		628	595	302	625	537.5	413	405	185	297	325						0.0246561	0.027156	0.0152373	0.0222222	0.0223179	0.00802717	0.0057552	0.0109978	0.00826274	0.00826073		0.000909005	0.000753884	0.00063229	0.00081442	0.0007774	0.000465282	0.000319256	0.00042548	0.000317012	0.000381758
NM_027427	538	238	530	262	301	332.75	359	819	198	311	421.75		306	446	73	367	298	480	181	126	519	326.5						0.0425228	0.0562215	0.035329	0.0426044	0.0441694	0.0369456	0.0274041	0.0395921	0.0215942	0.031384		0.000442923	0.000565096	0.000152838	0.000478228	0.000409771	0.000540764	0.00014268	0.000289786	0.000553971	0.0003818
NM_138660	679	79	153	105	131	117	215	355	120	196	221.5		274	529	119	429	337.75	335	335	126	510	326.5						0.0141147	0.01623	0.0141586	0.0185421	0.0157613	0.0221262	0.0118785	0.0239952	0.0136092	0.0179023		0.000396604	0.00067026	0.000249147	0.000559018	0.000468757	0.000377408	0.000264076	0.000289786	0.000544365	0.000368909
NM_029607	209	108	179	167	161	153.75	246	477	121	239	270.75		148	366	116	294	231	338	369	139	462	327						0.0192961	0.018988	0.0225189	0.0227884	0.0208978	0.0253165	0.0159607	0.0241952	0.0165949	0.0205168		0.000214224	0.000463734	0.000242866	0.000383103	0.000325982	0.000380788	0.000290878	0.000319685	0.00049313	0.00037112
NM_001166545	92	264	1211	235	457	541.75	422	2548	126	851	986.75		190	541	120	329	295	318	539	67	386	327.5						0.0471681	0.128461	0.0316882	0.0646851	0.0680006	0.043429	0.0852573	0.025195	0.059089	0.0532426		0.000275018	0.000685464	0.000251241	0.000428711	0.000410108	0.000358256	0.000424886	0.000154093	0.000412009	0.000337311
NM_172142	308	169	392	167	65	198.25	44	69	31	39	45.75		1233	1866	765	1113	1244.25	367	340	242	363	328						0.0301947	0.0415827	0.0225189	0.00920028	0.0258741	0.00452815	0.00230877	0.00619876	0.00270796	0.00393591		0.00178472	0.00236428	0.00160166	0.00145032	0.00180025	0.000413459	0.000268017	0.000556574	0.00038746	0.000406377
NM_011288	127	75	250	126	187	159.5	164	625	138	280	301.75		103	257	164	182	176.5	318	455	165	383	330.25						0.0134	0.0265196	0.0169903	0.0264685	0.0208446	0.0168776	0.0209128	0.0275945	0.0194417	0.0212067		0.000149088	0.000325627	0.000343363	0.000237159	0.000263809	0.000358256	0.00035867	0.000379482	0.000408807	0.000376304
NM_010427	709	63	254	52	105	118.5	88	252	40	127	126.75		168	609	126	540	360.75	260	600	47	416	330.75						0.011256	0.0269439	0.00701187	0.014862	0.0150184	0.00905629	0.00843204	0.0079984	0.00881822	0.00857624		0.000243173	0.000771623	0.000263803	0.000703659	0.000495565	0.000292914	0.000472972	0.000108095	0.000444031	0.000329503
NM_001163246	1026	104	174	109	101	122	186	228	72	122	152		160	454	80	531	306.25	235	628	50	411	331						0.0185814	0.0184576	0.014698	0.0142958	0.0165082	0.0191417	0.00762899	0.0143971	0.00847105	0.0124097		0.000231594	0.000575233	0.000167494	0.000691932	0.000416563	0.000264749	0.000495044	0.000114995	0.000438694	0.00032837
NM_153515	291	82	177	108	90	114.25	149	193	71	100	128.25		192	680	97	525	373.5	305	475	86	473	334.75						0.0146507	0.0187759	0.0145631	0.0127389	0.0151821	0.015334	0.00645787	0.0141972	0.00694348	0.0107331		0.000277912	0.000861582	0.000203086	0.000684113	0.000506673	0.00034361	0.000374436	0.000197791	0.000504872	0.000355177
NM_175663	108	3160	4983	1596	4309	3512	3915	8410	1037	4673	4508.75		576	409	307	596	472	481	238	263	360	335.5						0.564588	0.528588	0.21521	0.609908	0.479574	0.402902	0.281403	0.207359	0.324469	0.304033		0.000833737	0.000518216	0.000642758	0.000776631	0.000692836	0.000541891	0.000187612	0.000604872	0.000384257	0.000429658
NM_153799	489	129	179	104	97	127.25	165	286	68	118	159.25		268	230	149	327	243.5	451	327	154	414	336.5						0.0230481	0.018988	0.0140237	0.0137297	0.0174474	0.0169805	0.0095697	0.0135973	0.00819331	0.0120852		0.000387919	0.000291417	0.000311958	0.000426105	0.00035435	0.000508093	0.00025777	0.000354183	0.000441896	0.000390485
NM_029391	194	119	229	159	146	163.25	190	345	66	139	185		307	203	234	289	258.25	479	302	272	293	336.5						0.0212614	0.0242919	0.0214401	0.0206653	0.0219147	0.0195534	0.0115439	0.0131974	0.00965144	0.0134865		0.00044437	0.000257208	0.00048992	0.000376588	0.000392021	0.000539637	0.000238062	0.000625571	0.000312743	0.000429003
NM_172203	544	332	256	217	118	230.75	46	227	84	72	107.25		1330	1102	654	872	989.5	171	542	306	327	336.5						0.0593175	0.027156	0.0292611	0.0167021	0.0331092	0.00473397	0.00759553	0.0167966	0.00499931	0.00853136		0.00192512	0.00139627	0.00136926	0.00113628	0.00145673	0.000192647	0.000427251	0.000703767	0.000349034	0.000418175
NM_001038846	363	280	750	331	133	373.5	70	89	42	37	59.5		1353	1686	705	639	1095.75	311	330	199	512	338						0.0500268	0.0795587	0.0446332	0.0188252	0.048261	0.00720387	0.00297798	0.00839832	0.00256909	0.00528732		0.00195841	0.00213622	0.00147604	0.000832663	0.00160083	0.00035037	0.000260134	0.000457679	0.000546499	0.000403671
NM_009832	563	98	146	124	156	131	198	349	76	210	208.25		388	398	142	428	339	458	382	102	411	338.25						0.0175094	0.0154874	0.0167206	0.0220807	0.0179495	0.0203767	0.0116777	0.015197	0.0145813	0.0154582		0.000561615	0.000504279	0.000297302	0.000557715	0.000480228	0.000515979	0.000301125	0.000234589	0.000438694	0.000372597
NM_025997	100	41	149	101	111	100.5	117	276	62	171	156.5		193	425	132	240	247.5	224	603	83	444	338.5						0.00732535	0.0158057	0.0136192	0.0157113	0.0131154	0.0120408	0.00923509	0.0123975	0.0118734	0.0113867		0.00027936	0.000538489	0.000276365	0.000312737	0.000351738	0.000252357	0.000475336	0.000190891	0.000473917	0.000348125
NM_025864	331	154	482	235	274	286.25	293	941	136	431	450.25		126	361	103	299	222.25	131	568	73	585	339.25						0.0275147	0.0511297	0.0316882	0.0387827	0.0372789	0.0301533	0.0314863	0.0271946	0.0299264	0.0296902		0.00018238	0.000457399	0.000215649	0.000389619	0.000311261	0.000147584	0.000447746	0.000167892	0.000624418	0.00034691
NM_027246	67	74	258	91	161	146	69	323	65	170	156.75		370	81	272	95	204.5	625	167	424	142	339.5						0.0132214	0.0273682	0.0122708	0.0227884	0.0189122	0.00710096	0.0108077	0.0129974	0.0118039	0.0106775		0.00053556	0.00010263	0.00056948	0.000123792	0.000332865	0.00070412	0.000131644	0.000975154	0.000151568	0.000490622
NM_133828	308	74	431	141	108	188.5	101	196	49	97	110.75		227	625	137	512	375.25	281	590	53	435	339.75						0.0132214	0.0457197	0.0190129	0.0152866	0.0233102	0.0103942	0.00655825	0.00979804	0.00673518	0.00837141		0.000328574	0.000791895	0.000286834	0.000667173	0.000518619	0.000316572	0.000465089	0.000121894	0.000464311	0.000341967
NM_025315	125	187	391	321	237	284	362	688	236	322	402		144	379	186	358	266.75	159	671	192	338	340						0.0334108	0.0414766	0.0432848	0.0335456	0.0379295	0.0372543	0.0230208	0.0471906	0.022358	0.0324559		0.000208434	0.000480205	0.000389424	0.0004665	0.000386141	0.000179128	0.00052894	0.000441579	0.000360775	0.000377606
NM_026661	365	121	150	72	108	112.75	226	368	74	192	215		229	475	172	421	324.25	378	478	181	323	340						0.0216187	0.0159117	0.00970874	0.0152866	0.0156315	0.0232582	0.0123135	0.014797	0.0133315	0.015925		0.000331469	0.00060184	0.000360112	0.000548594	0.000460504	0.000425852	0.000376801	0.00041628	0.000344764	0.000390924
NM_001164818	365	121	150	72	108	112.75	226	368	74	192	215		229	475	172	421	324.25	378	478	181	323	340						0.0216187	0.0159117	0.00970874	0.0152866	0.0156315	0.0232582	0.0123135	0.014797	0.0133315	0.015925		0.000331469	0.00060184	0.000360112	0.000548594	0.000460504	0.000425852	0.000376801	0.00041628	0.000344764	0.000390924
NM_009455	174	135	313	187	211	211.5	281	626	132	349	347		170	269	234	311	246	403	358	186	415	340.5						0.0241201	0.0332025	0.0252157	0.0298655	0.028101	0.0289184	0.0209463	0.0263947	0.0242327	0.025123		0.000246068	0.000340832	0.00048992	0.000405256	0.000370519	0.000454016	0.000282206	0.00042778	0.000442963	0.000401742
NM_009016	234	189	274	296	129	222	234	594	189	184	300.25		170	443	279	242	283.5	271	597	274	221	340.75						0.0337681	0.0290655	0.0399137	0.018259	0.0302516	0.0240815	0.0198755	0.0377924	0.012776	0.0236314		0.000246068	0.000561295	0.000584135	0.000315344	0.000426711	0.000305306	0.000470607	0.00063017	0.000235891	0.000410494
NM_009017	234	189	274	296	129	222	234	594	189	184	300.25		170	443	279	242	283.5	271	597	274	221	340.75						0.0337681	0.0290655	0.0399137	0.018259	0.0302516	0.0240815	0.0198755	0.0377924	0.012776	0.0236314		0.000246068	0.000561295	0.000584135	0.000315344	0.000426711	0.000305306	0.000470607	0.00063017	0.000235891	0.000410494
NM_009829	270	116	320	104	113	163.25	172	378	73	103	181.5		337	699	94	285	353.75	332	471	136	429	342						0.0207254	0.0339451	0.0140237	0.0159943	0.0211721	0.0177009	0.0126481	0.0145971	0.00715178	0.0130245		0.000487794	0.000885655	0.000196805	0.000371376	0.000485408	0.000374028	0.000371283	0.000312785	0.000457907	0.000379001
NM_134048	471	84	276	142	137	159.75	153	326	73	165	179.25		141	693	44	523	350.25	118	749	24	478	342.25						0.015008	0.0292776	0.0191478	0.0193914	0.0207062	0.0157456	0.0109081	0.0145971	0.0114567	0.0131769		0.000204092	0.000878053	9.21217e-05	0.000681507	0.000463943	0.000132938	0.000590426	5.51974e-05	0.000510208	0.000322192
NM_008692	316	158	310	147	151	191.5	237	479	66	227	252.25		182	516	151	390	309.75	242	520	164	447	343.25						0.0282294	0.0328843	0.019822	0.021373	0.0255772	0.0243902	0.0160276	0.0131974	0.0157617	0.0173442		0.000263438	0.000653789	0.000316145	0.000508198	0.000435392	0.000272635	0.000409909	0.000377182	0.00047712	0.000384211
NM_001048168	316	158	310	147	151	191.5	237	479	66	227	252.25		182	516	151	390	309.75	242	520	164	447	343.25						0.0282294	0.0328843	0.019822	0.021373	0.0255772	0.0243902	0.0160276	0.0131974	0.0157617	0.0173442		0.000263438	0.000653789	0.000316145	0.000508198	0.000435392	0.000272635	0.000409909	0.000377182	0.00047712	0.000384211
NM_139304	575	268	856	328	321	443.25	340	680	182	289	372.75		300	759	100	334	373.25	360	428	77	510	343.75						0.0478828	0.090803	0.0442287	0.0454352	0.0570874	0.0349902	0.0227531	0.0363927	0.0200667	0.0285507		0.000434238	0.000961677	0.000209368	0.000435226	0.000510127	0.000405573	0.000337386	0.000177092	0.000544365	0.000366104
NM_026674	239	105	160	81	73	104.75	182	173	90	97	135.5		307	295	193	233	257	397	406	196	377	344						0.0187601	0.0169725	0.0109223	0.0103326	0.0142469	0.0187301	0.00578866	0.0179964	0.00673518	0.0123126		0.00044437	0.000373774	0.000404079	0.000303616	0.00038146	0.000447257	0.000320044	0.000450779	0.000402403	0.000405121
NM_011498	392	340	889	326	323	469.5	130	430	101	178	209.75		926	1833	498	778	1008.75	228	564	167	417	344						0.0607468	0.0943036	0.043959	0.0457183	0.0611819	0.0133786	0.014388	0.020196	0.0123594	0.0150805		0.00134035	0.00232247	0.00104265	0.00101379	0.00142981	0.000256863	0.000444593	0.000384082	0.000445098	0.000382659
NM_001046637	268	178	267	220	321	246.5	611	1000	189	594	598.5		100	225	87	310	180.5	210	577	77	513	344.25						0.0318028	0.0283229	0.0296656	0.0454352	0.0338066	0.0628795	0.0334605	0.0377924	0.0412443	0.0438442		0.000144746	0.000285082	0.00018215	0.000403952	0.000253983	0.000236584	0.000454841	0.000177092	0.000547567	0.000354021
NM_015782	268	178	267	220	321	246.5	611	1000	189	594	598.5		100	225	87	310	180.5	210	577	77	513	344.25						0.0318028	0.0283229	0.0296656	0.0454352	0.0338066	0.0628795	0.0334605	0.0377924	0.0412443	0.0438442		0.000144746	0.000285082	0.00018215	0.000403952	0.000253983	0.000236584	0.000454841	0.000177092	0.000547567	0.000354021
NM_001205287	399	724	1373	307	218	655.5	50	115	40	45	62.5		3771	5229	1264	1423	2921.75	277	515	146	439	344.25						0.129355	0.145645	0.041397	0.0308563	0.0868135	0.00514562	0.00384796	0.0079984	0.00312457	0.00502914		0.00545837	0.00662531	0.00264641	0.00185427	0.00414609	0.000312066	0.000405967	0.000335784	0.000468581	0.0003806
NM_133761	583	148	432	189	222	247.75	219	472	119	209	254.75		240	556	169	615	395	293	522	98	471	346						0.0264427	0.0458258	0.0254854	0.0314225	0.0322941	0.0225378	0.0157933	0.0237952	0.0145119	0.0191596		0.000347391	0.00070447	0.000353831	0.00080139	0.00055177	0.000330091	0.000411485	0.000225389	0.000502737	0.000367426
NM_011722	171	74	213	140	163	147.5	218	593	83	290	296		101	390	111	245	211.75	355	485	138	407	346.25						0.0132214	0.0225947	0.0188781	0.0230715	0.0194414	0.0224349	0.0198421	0.0165967	0.0201361	0.0197524		0.000146194	0.000494143	0.000232398	0.000319253	0.000297997	0.00039994	0.000382319	0.000317385	0.000434424	0.000383517
NM_178593	393	296	806	339	148	397.25	73	98	43	50	66		1358	1723	721	672	1118.5	319	352	200	514	346.25						0.0528855	0.0854991	0.045712	0.0209483	0.0512612	0.00751261	0.00327913	0.00859828	0.00347174	0.00571544		0.00196565	0.0021831	0.00150954	0.000875665	0.00163349	0.000359383	0.000277477	0.000459978	0.000548634	0.000411368
NM_026579	166	57	277	49	94	119.25	61	239	24	120	111		186	827	120	375	377	250	552	62	522	346.5						0.010184	0.0293837	0.00660734	0.013305	0.01487	0.00627766	0.00799706	0.00479904	0.00833218	0.00685148		0.000269228	0.00104784	0.000251241	0.000488652	0.000514239	0.000281648	0.000435134	0.000142593	0.000557173	0.000354137
NM_011432	140	162	463	103	217	236.25	307	734	123	370	383.5		159	368	175	309	252.75	221	512	216	439	347						0.0289441	0.0491142	0.0138889	0.0307148	0.0306655	0.0315941	0.02456	0.0245951	0.0256909	0.02661		0.000230146	0.000466268	0.000366393	0.000402649	0.000366364	0.000248977	0.000403602	0.000496777	0.000468581	0.000404484
NM_026620	410	206	418	249	288	290.25	293	714	182	311	375		351	555	110	487	375.75	481	297	166	446	347.5						0.0368054	0.0443407	0.0335761	0.0407643	0.0388716	0.0301533	0.0238908	0.0363927	0.0215942	0.0280078		0.000508059	0.000703203	0.000230304	0.000634596	0.000519041	0.000541891	0.000234121	0.000381782	0.000476052	0.000408461
NM_001017426	1622	550	1299	363	314	631.5	78	268	111	61	129.5		2087	5116	441	2870	2628.5	225	499	95	580	349.75						0.0982669	0.137796	0.0489482	0.0444444	0.0823638	0.00802717	0.00896741	0.0221956	0.00423552	0.0108564		0.00302085	0.00648214	0.000923311	0.00373982	0.00354153	0.000253483	0.000393355	0.00021849	0.000619081	0.000371102
NM_020587	472	69	230	93	97	122.25	98	205	46	104	113.25		267	468	197	276	302	346	446	126	483	350.25						0.012328	0.024398	0.0125405	0.0137297	0.015749	0.0100854	0.0068594	0.00919816	0.00722122	0.00834105		0.000386472	0.000592971	0.000412454	0.000359648	0.000437886	0.000389801	0.000351576	0.000289786	0.000515545	0.000386677
NM_054055	581	37	69	184	110	100	61	320	99	133	153.25		135	166	382	471	288.5	168	451	312	471	350.5						0.00661068	0.0073194	0.0248112	0.0155697	0.0135778	0.00627766	0.0107074	0.019796	0.00923483	0.011504		0.000195407	0.000210327	0.000799784	0.000613747	0.000454816	0.000189267	0.000355517	0.000717566	0.000502737	0.000441272
NM_025409	63	77	212	60	123	118	93	354	38	150	158.75		258	361	301	446	341.5	466	397	229	323	353.75						0.0137574	0.0224886	0.00809061	0.0174098	0.0154366	0.00957086	0.011845	0.00759848	0.0104152	0.00985739		0.000373445	0.000457399	0.000630196	0.00058117	0.000510553	0.000524992	0.00031295	0.000526675	0.000344764	0.000427345
NM_020030	230	194	306	336	138	243.5	246	645	211	189	322.75		173	489	270	263	298.75	246	651	282	242	355.25						0.0346614	0.03246	0.0453074	0.0195329	0.0329904	0.0253165	0.021582	0.0421916	0.0131232	0.0255533		0.000250411	0.000619579	0.000565292	0.000342708	0.000444497	0.000277142	0.000513174	0.00064857	0.000258306	0.000424298
NM_009745	183	66	178	78	80	100.5	117	177	61	91	111.5		201	386	219	202	252	352	487	160	427	356.5						0.011792	0.0188819	0.0105178	0.0113234	0.0131288	0.0120408	0.00592251	0.0121976	0.00631857	0.00911985		0.00029094	0.000489074	0.000458515	0.000263221	0.000375437	0.00039656	0.000383895	0.000367983	0.000455772	0.000401053
NM_001024932	206	194	170	408	260	258	404	405	398	255	365.5		108	172	357	184	205.25	376	397	303	356	358						0.0346614	0.0180333	0.0550162	0.0368011	0.036128	0.0415766	0.0135515	0.0795841	0.0177059	0.0381045		0.000156326	0.00021793	0.000747442	0.000239765	0.000340366	0.000423598	0.00031295	0.000696867	0.000379988	0.000453351
NM_015740	106	122	418	161	215	229	360	687	113	308	367		207	171	235	198	202.75	364	550	183	337	358.5						0.0217974	0.0443407	0.0217098	0.0304317	0.0295699	0.0370485	0.0229874	0.0225955	0.0213859	0.0260043		0.000299624	0.000216662	0.000492014	0.000258008	0.000316577	0.000410079	0.000433557	0.00042088	0.000359708	0.000406056
NM_001101605	451	165	42	141	194	135.5	135	189	74	119	129.25		367	105	158	432	265.5	423	568	99	344	358.5						0.0294801	0.00445529	0.0190129	0.0274593	0.0201019	0.0138932	0.00632403	0.014797	0.00826274	0.0108192		0.000531218	0.000133038	0.000330801	0.000562927	0.000389496	0.000476548	0.000447746	0.000227689	0.000367179	0.000379791
NM_001110517	451	165	42	141	194	135.5	135	189	74	119	129.25		367	105	158	432	265.5	423	568	99	344	358.5						0.0294801	0.00445529	0.0190129	0.0274593	0.0201019	0.0138932	0.00632403	0.014797	0.00826274	0.0108192		0.000531218	0.000133038	0.000330801	0.000562927	0.000389496	0.000476548	0.000447746	0.000227689	0.000367179	0.000379791
NM_023127	39	63	192	78	123	114	155	414	74	174	204.25		285	306	345	350	321.5	404	374	379	279	359						0.011256	0.020367	0.0105178	0.0174098	0.0148877	0.0159514	0.0138526	0.014797	0.0120817	0.0141707		0.000412526	0.000387712	0.000722318	0.000456075	0.000494658	0.000455143	0.000294819	0.000871659	0.000297799	0.000479855
NM_011817	140	367	1051	261	247	481.5	60	191	9	64	81		2815	2972	1409	1114	2077.5	499	473	56	408	359						0.0655708	0.111488	0.0351942	0.0349611	0.0618036	0.00617475	0.00639095	0.00179964	0.00444383	0.00470229		0.0040746	0.00376562	0.00294999	0.00145162	0.00306046	0.000562169	0.000372859	0.000128794	0.000435492	0.000374829
NM_133747	496	60	126	88	143	104.25	196	480	60	254	247.5		128	328	122	339	229.25	403	428	136	470	359.25						0.01072	0.0133659	0.0118662	0.0202406	0.0140482	0.0201708	0.016061	0.0119976	0.0176364	0.0164665		0.000185275	0.000415587	0.000255428	0.000441742	0.000324508	0.000454016	0.000337386	0.000312785	0.000501669	0.000401464
NM_053173	653	135	103	104	142	121	368	342	147	208	266.25		323	126	150	249	212	742	228	176	294	360						0.0241201	0.0109261	0.0140237	0.0200991	0.0172922	0.0378718	0.0114435	0.0293941	0.0144424	0.023288		0.00046753	0.000159646	0.000314051	0.000324465	0.000316423	0.000835931	0.000179729	0.000404781	0.00031381	0.000433563
NM_009952	322	75	427	141	107	187.5	102	196	50	94	110.5		266	671	152	567	414	295	624	70	455	361						0.0134	0.0452954	0.0190129	0.0151451	0.0232134	0.0104971	0.00655825	0.009998	0.00652687	0.00839505		0.000385025	0.000850179	0.000318239	0.000738842	0.000573071	0.000332345	0.000491891	0.000160992	0.000485659	0.000367722
NM_001164472	114	92	201	100	169	140.5	160	356	54	179	187.25		142	363	211	218	233.5	169	804	110	366	362.25						0.0164374	0.0213217	0.0134844	0.0239207	0.0187911	0.016466	0.0119119	0.0107978	0.0124288	0.0129011		0.000205539	0.000459933	0.000441765	0.00028407	0.000347827	0.000190394	0.000633782	0.000252988	0.000390662	0.000366956
NM_019726	308	91	137	75	131	108.5	246	387	94	190	229.25		135	376	155	257	230.75	245	678	127	402	363						0.0162587	0.0145327	0.0101133	0.0185421	0.0148617	0.0253165	0.0129492	0.0187962	0.0131926	0.0175636		0.000195407	0.000476404	0.00032452	0.00033489	0.000332805	0.000276015	0.000534458	0.000292086	0.000429087	0.000382912
NM_026662	299	71	133	95	137	109	193	439	78	194	226		132	335	89	448	251	304	519	92	537	363						0.0126854	0.0141084	0.0128101	0.0193914	0.0147488	0.0198621	0.0146892	0.0155969	0.0134704	0.0159046		0.000191065	0.000424456	0.000186337	0.000583776	0.000346409	0.000342484	0.00040912	0.00021159	0.000573184	0.000384095
NM_013653	72	490	382	159	360	347.75	243	181	228	165	204.25		898	327	232	580	509.25	385	161	570	337	363.25						0.0875469	0.0405219	0.0214401	0.0509554	0.0501161	0.0250077	0.00605635	0.0455909	0.0114567	0.0220279		0.00129982	0.000414319	0.000485733	0.000755782	0.000738913	0.000433738	0.000126914	0.00131094	0.000359708	0.000557825
NM_144844	705	79	110	122	105	104	217	347	83	146	198.25		189	254	164	348	238.75	357	494	123	491	366.25						0.0141147	0.0116686	0.0164509	0.014862	0.0142741	0.022332	0.0116108	0.0165967	0.0101375	0.0151692		0.00027357	0.000321826	0.000343363	0.000453469	0.000348057	0.000402193	0.000389413	0.000282887	0.000524084	0.000399644
NM_001242430	365	86	206	121	103	129	163	211	74	119	141.75		206	770	101	554	407.75	339	492	101	535	366.75						0.0153654	0.0218521	0.0163161	0.0145789	0.0170281	0.0167747	0.00706016	0.014797	0.00826274	0.0117237		0.000298177	0.000975615	0.000211461	0.000721902	0.000551789	0.000381915	0.000387837	0.000232289	0.000571049	0.000393272
NM_172593	532	97	235	72	45	112.25	59	124	45	47	68.75		916	1531	391	787	906.25	425	565	129	348	366.75						0.0173307	0.0249284	0.00970874	0.00636943	0.0145843	0.00607183	0.0041491	0.0089982	0.00326344	0.00562064		0.00132587	0.00193983	0.000818627	0.00102552	0.00127746	0.000478801	0.000445382	0.000296686	0.000371449	0.00039808
NM_026435	66	95	419	155	279	237	214	732	92	297	333.75		145	323	138	368	243.5	161	826	107	384	369.5						0.0169734	0.0444468	0.0209008	0.0394904	0.0304528	0.0220233	0.0244931	0.0183963	0.0206221	0.0213837		0.000209882	0.000409251	0.000288927	0.000479531	0.000346898	0.000181381	0.000651124	0.000246088	0.000409875	0.000372117
NM_011031	518	139	106	170	148	140.75	223	276	140	106	186.25		412	144	307	318	295.25	362	326	380	411	369.75						0.0248347	0.0112443	0.0229234	0.0209483	0.0199877	0.0229495	0.00923509	0.0279944	0.00736009	0.0168848		0.000596354	0.000182453	0.000642758	0.000414377	0.000458985	0.000407826	0.000256981	0.000873959	0.000438694	0.000494365
NM_001004174	64	392	495	423	353	415.75	557	703	505	232	499.25		324	227	424	226	300.25	295	292	772	120	369.75						0.0700375	0.0525088	0.0570388	0.0499646	0.0573874	0.0573222	0.0235227	0.10098	0.0161089	0.0494834		0.000468977	0.000287616	0.000887718	0.000294494	0.000484702	0.000332345	0.00023018	0.00177552	0.000128086	0.000616532
NM_009344	386	435	408	120	259	305.5	175	217	120	163	168.75		637	859	123	975	648.5	372	378	174	560	371						0.0777202	0.0432799	0.0161812	0.0366596	0.0434602	0.0180097	0.00726092	0.0239952	0.0113179	0.0151459		0.000922033	0.00108838	0.000257522	0.0012705	0.000884608	0.000419092	0.000297972	0.000400181	0.000597734	0.000428745
NM_001253847	472	84	276	143	137	160	154	327	73	165	179.75		150	712	44	568	368.5	132	784	24	546	371.5						0.015008	0.0292776	0.0192826	0.0193914	0.0207399	0.0158485	0.0109416	0.0145971	0.0114567	0.013211		0.000217119	0.000902127	9.21217e-05	0.000740145	0.000487878	0.00014871	0.000618016	5.51974e-05	0.00058279	0.000351179
NM_180588	238	151	123	132	93	124.75	308	250	127	134	204.75		234	297	206	261	249.5	385	379	276	449	372.25						0.0269787	0.0130476	0.0177994	0.0131635	0.0177473	0.031697	0.00836512	0.0253949	0.00930426	0.0186903		0.000338706	0.000376309	0.000431297	0.000340102	0.000371603	0.000433738	0.00029876	0.00063477	0.000479254	0.000461631
NM_001159351	84	76	223	132	129	140	266	592	127	199	296		158	302	83	236	194.75	268	705	106	411	372.5						0.0135787	0.0236555	0.0177994	0.018259	0.0183231	0.0273747	0.0198086	0.0253949	0.0138175	0.0215989		0.000228699	0.000382644	0.000173775	0.000307525	0.000273161	0.000301927	0.000555742	0.000243789	0.000438694	0.000385038
NM_013866	367	94	228	107	117	136.5	205	306	56	155	180.5		79	432	29	409	237.25	196	574	34	688	373						0.0167947	0.0241858	0.0144283	0.0165605	0.0179923	0.021097	0.0102389	0.0111978	0.0107624	0.013324		0.000114349	0.000547358	6.07166e-05	0.000532957	0.000313845	0.000220812	0.000452476	7.81963e-05	0.000734359	0.000371461
NM_029436	581	60	187	103	53	100.75	87	109	54	54	76		348	1408	223	581	640	241	650	79	523	373.25						0.01072	0.0198366	0.0138889	0.00750177	0.0129868	0.00895338	0.00364719	0.0107978	0.00374948	0.00678697		0.000503716	0.00178398	0.00046689	0.000757085	0.000877918	0.000271509	0.000512386	0.000181691	0.000558241	0.000380957
NM_001136076	516	140	114	167	150	142.75	233	286	148	111	194.5		389	142	315	324	292.5	364	333	383	414	373.5						0.0250134	0.0120929	0.0225189	0.0212314	0.0202142	0.0239786	0.0095697	0.0295941	0.00770726	0.0177124		0.000563062	0.000179919	0.000659508	0.000422195	0.000456171	0.000410079	0.000262499	0.000880859	0.000441896	0.000498833
NM_171826	234	134	252	168	109	165.75	112	203	73	81	117.25		559	647	412	443	515.25	350	435	297	416	374.5						0.0239414	0.0267317	0.0226537	0.0154282	0.0221888	0.0115262	0.00679248	0.0145971	0.00562422	0.00963499		0.000809131	0.00081977	0.000862594	0.000577261	0.000767189	0.000394307	0.000342904	0.000683068	0.000444031	0.000466078
NM_001045540	816	155	118	162	377	203	286	488	78	442	323.5		238	193	173	875	369.75	337	490	56	618	375.25						0.0276934	0.0125172	0.0218447	0.0533616	0.0288542	0.029433	0.0163287	0.0155969	0.0306902	0.0230122		0.000344496	0.000244537	0.000362206	0.00114019	0.000522857	0.000379661	0.00038626	0.000128794	0.000659642	0.000388589
NM_133679	329	66	151	107	147	117.75	161	515	91	178	236.25		132	299	135	391	239.25	282	596	146	479	375.75						0.011792	0.0160178	0.0144283	0.0208068	0.0157612	0.0165689	0.0172321	0.0181964	0.0123594	0.0160892		0.000191065	0.000378843	0.000282646	0.000509501	0.000340514	0.000317699	0.000469818	0.000335784	0.000511276	0.000408644
NM_011206	434	78	240	52	107	119.25	170	293	45	153	165.25		248	286	244	225	250.75	413	472	152	469	376.5						0.013936	0.0254588	0.00701187	0.0151451	0.0153879	0.0174951	0.00980392	0.0089982	0.0106235	0.0117302		0.00035897	0.000362371	0.000510857	0.000293191	0.000381347	0.000465282	0.000372071	0.000349584	0.000500602	0.000421885
NM_001134427	90	37	124	159	92	103	132	330	109	127	174.5		57	566	106	408	284.25	212	583	104	615	378.5						0.00661068	0.0131537	0.0214401	0.0130219	0.0135566	0.0135844	0.011042	0.0217956	0.00881822	0.0138101		8.25053e-05	0.00071714	0.00022193	0.000531654	0.000388307	0.000238837	0.000459571	0.000239189	0.00065644	0.000398509
NM_177343	366	84	152	113	78	106.75	132	306	59	104	150.25		111	434	107	330	245.5	230	689	55	544	379.5						0.015008	0.0161239	0.0152373	0.0110403	0.0143524	0.0135844	0.0102389	0.0117976	0.00722122	0.0107106		0.000160668	0.000549892	0.000224023	0.000430014	0.000341149	0.000259116	0.000543129	0.000126494	0.000580656	0.000377349
NM_145360	264	461	400	272	298	357.75	1042	815	270	606	683.25		150	396	32	462	260	213	640	76	595	381						0.0823656	0.0424313	0.0366775	0.0421798	0.0509135	0.107235	0.0272703	0.0539892	0.0420775	0.0576429		0.000217119	0.000501745	6.69976e-05	0.00060202	0.00034697	0.000239964	0.000504503	0.000174792	0.000635092	0.000388588
NM_011793	70	106	386	171	172	208.75	284	586	201	168	309.75		227	537	145	469	344.5	354	428	226	521	382.25						0.0189387	0.0409462	0.0230583	0.0243454	0.0268221	0.0292271	0.0196078	0.040192	0.011665	0.025173		0.000328574	0.000680396	0.000303583	0.000611141	0.000480923	0.000398813	0.000337386	0.000519776	0.000556106	0.00045302
NM_001038231	70	106	386	171	172	208.75	284	586	201	168	309.75		227	537	145	469	344.5	354	428	226	521	382.25						0.0189387	0.0409462	0.0230583	0.0243454	0.0268221	0.0292271	0.0196078	0.040192	0.011665	0.025173		0.000328574	0.000680396	0.000303583	0.000611141	0.000480923	0.000398813	0.000337386	0.000519776	0.000556106	0.00045302
NM_007764	284	104	256	136	146	160.5	230	375	95	180	220		152	679	124	505	365	308	550	83	594	383.75						0.0185814	0.027156	0.0183387	0.0206653	0.0211854	0.0236699	0.0125477	0.0189962	0.0124983	0.016928		0.000220014	0.000860315	0.000259616	0.000658052	0.000499499	0.00034699	0.000433557	0.000190891	0.000634025	0.000401366
NM_020590	98	103	625	110	193	257.75	117	440	49	201	201.75		259	595	241	371	366.5	219	628	87	601	383.75						0.0184027	0.0662989	0.0148328	0.0273178	0.0317131	0.0120408	0.0147226	0.00979804	0.0139564	0.0126295		0.000374892	0.000753884	0.000504576	0.00048344	0.000529198	0.000246724	0.000495044	0.000200091	0.000641496	0.000395839
NM_001134474	1596	71	192	87	72	105.5	137	224	120	39	130		428	1130	223	552	583.25	408	558	381	188	383.75						0.0126854	0.020367	0.0117314	0.0101911	0.0137437	0.014099	0.00749515	0.0239952	0.00270796	0.0120743		0.000619513	0.00143175	0.00046689	0.000719296	0.000809361	0.000459649	0.000439864	0.000876259	0.000200668	0.00049411
NM_001045523	753	80	232	108	135	138.75	223	394	79	170	216.5		95	351	88	410	236	370	497	110	566	385.75						0.0142934	0.0246102	0.0145631	0.0191083	0.0181437	0.0229495	0.0131834	0.0157968	0.0118039	0.0159334		0.000137509	0.000444728	0.000184243	0.00053426	0.000325185	0.000416839	0.000391778	0.000252988	0.000604138	0.000416436
NM_001037717	438	93	94	95	130	103	135	205	69	141	137.5		295	369	315	708	421.75	356	463	161	563	385.75						0.016616	0.00997136	0.0128101	0.0184006	0.0144495	0.0138932	0.0068594	0.0137972	0.00979031	0.011085		0.000427001	0.000467535	0.000659508	0.000922575	0.000619155	0.000401067	0.000364976	0.000370283	0.000600936	0.000434315
NM_145391	432	94	157	131	94	119	135	273	64	109	145.25		320	313	278	334	311.25	464	376	242	462	386						0.0167947	0.0166543	0.0176645	0.013305	0.0161046	0.0138932	0.00913471	0.0127974	0.00756839	0.0108484		0.000463187	0.000396581	0.000582042	0.000435226	0.000469259	0.000522739	0.000296396	0.000556574	0.00049313	0.00046721
NM_133209	205	203	198	470	266	284.25	393	446	443	263	386.25		349	191	674	313	381.75	394	364	478	309	386.25						0.0362694	0.0210035	0.0633765	0.0376504	0.039575	0.0404446	0.0149234	0.0885823	0.0182614	0.0405529		0.000505164	0.000242003	0.00141114	0.000407862	0.000641541	0.000443877	0.000286936	0.00109935	0.000329821	0.000539996
NM_001165991	182	120	204	126	86	134	143	252	54	80	132.25		781	631	299	495	551.5	340	604	145	457	386.5						0.0214401	0.02164	0.0169903	0.0121727	0.0180608	0.0147165	0.00843204	0.0107978	0.00555478	0.00987529		0.00113047	0.000799497	0.000626009	0.000645021	0.000800248	0.000383041	0.000476125	0.000333484	0.000487793	0.000420111
NM_001165992	182	120	204	126	86	134	143	252	54	80	132.25		781	631	299	495	551.5	340	604	145	457	386.5						0.0214401	0.02164	0.0169903	0.0121727	0.0180608	0.0147165	0.00843204	0.0107978	0.00555478	0.00987529		0.00113047	0.000799497	0.000626009	0.000645021	0.000800248	0.000383041	0.000476125	0.000333484	0.000487793	0.000420111
NM_029702	182	120	204	126	86	134	143	252	54	80	132.25		781	631	299	495	551.5	340	604	145	457	386.5						0.0214401	0.02164	0.0169903	0.0121727	0.0180608	0.0147165	0.00843204	0.0107978	0.00555478	0.00987529		0.00113047	0.000799497	0.000626009	0.000645021	0.000800248	0.000383041	0.000476125	0.000333484	0.000487793	0.000420111
NM_008630	42	828	3202	350	845	1306.25	304	1683	307	272	641.5		657	1327	323	581	722	200	845	365	136	386.5						0.147936	0.339663	0.0471953	0.119604	0.163599	0.0312854	0.056314	0.0613877	0.0188863	0.0419683		0.000950982	0.00168135	0.000676257	0.000757085	0.00101642	0.000225318	0.000666102	0.000839461	0.000145164	0.000469011
NM_025554	191	75	354	124	171	181	170	571	66	217	256		149	312	139	256	214	348	570	135	495	387						0.0134	0.0375517	0.0167206	0.0242038	0.022969	0.0174951	0.0191059	0.0131974	0.0150674	0.0162164		0.000215672	0.000395314	0.000291021	0.000333587	0.000308898	0.000392054	0.000449323	0.000310485	0.000528354	0.000420054
NM_007987	308	421	923	406	330	520	294	560	255	227	334		810	1319	512	796	859.25	307	482	418	344	387.75						0.0752189	0.0979103	0.0547465	0.0467091	0.0686462	0.0302563	0.0187379	0.0509898	0.0157617	0.0289364		0.00117244	0.00167122	0.00107196	0.00103725	0.00123822	0.000345864	0.000379954	0.000961355	0.000367179	0.000513588
NM_172149	209	50	181	97	97	106.25	159	337	75	217	197		178	255	180	252	216.25	344	585	158	467	388.5						0.00893336	0.0192002	0.0130798	0.0137297	0.0137358	0.0163631	0.0112762	0.014997	0.0150674	0.0144259		0.000257648	0.000323093	0.000376862	0.000328374	0.000321494	0.000387548	0.000461147	0.000363383	0.000498467	0.000427636
NM_001164571	317	130	397	136	115	194.5	38	65	34	20	39.25		1509	2157	805	1118	1397.25	382	503	252	418	388.75						0.0232267	0.0421131	0.0183387	0.0162774	0.024989	0.00391067	0.00217493	0.00679864	0.0013887	0.00356823		0.00218422	0.00273299	0.00168541	0.00145684	0.00201486	0.000430358	0.000396508	0.000579573	0.000446166	0.000463151
NM_009125	1267	125	275	151	200	187.75	292	527	116	261	299		179	463	62	414	279.5	346	452	43	715	389						0.0223334	0.0291715	0.0203614	0.0283086	0.0250437	0.0300504	0.0176337	0.0231954	0.0181225	0.0222505		0.000259095	0.000586636	0.000129808	0.000539472	0.000378753	0.000389801	0.000356305	9.88954e-05	0.000763178	0.000402045
NM_133968	340	68	244	62	79	113.25	117	253	48	78	124		183	443	188	314	282	345	711	173	327	389						0.0121494	0.0258831	0.0083603	0.0111819	0.0143937	0.0120408	0.0084655	0.00959808	0.00541591	0.00888006		0.000264885	0.000561295	0.000393611	0.000409165	0.000407239	0.000388674	0.000560471	0.000397881	0.000349034	0.000424015
NM_010220	437	52	213	132	107	126	175	333	92	177	194.25		134	464	148	345	272.75	205	638	82	633	389.5						0.00929069	0.0225947	0.0177994	0.0151451	0.0162075	0.0180097	0.0111423	0.0183963	0.01229	0.0149596		0.00019396	0.000587903	0.000309864	0.00044956	0.000385322	0.000230951	0.000502927	0.000188591	0.000675653	0.00039953
NM_001252450	257	142	268	169	113	173	114	226	79	89	127		570	669	420	496	538.75	357	444	319	442	390.5						0.0253707	0.028429	0.0227886	0.0159943	0.0231457	0.011732	0.00756207	0.0157968	0.0061797	0.0103177		0.000825053	0.000847644	0.000879344	0.000646324	0.000799591	0.000402193	0.000349999	0.000733666	0.000471783	0.00048941
NM_001161111	151	165	189	143	203	175	300	390	77	308	268.75		235	306	214	343	274.5	488	392	188	500	392						0.0294801	0.0200488	0.0192826	0.0287332	0.0243862	0.0308737	0.0130496	0.0153969	0.0213859	0.0201765		0.000340153	0.000387712	0.000448046	0.000446954	0.000405716	0.000549777	0.000309008	0.00043238	0.000533691	0.000456214
NM_001161370	325	88	221	118	125	138	148	374	54	169	186.25		208	376	233	267	271	255	658	128	529	392.5						0.0157227	0.0234433	0.0159115	0.0176929	0.0181926	0.015231	0.0125142	0.0107978	0.0117345	0.0125694		0.000301072	0.000476404	0.000487826	0.00034792	0.000403306	0.000287281	0.000518692	0.000294386	0.000564645	0.000416251
NM_009018	232	151	221	223	97	173	179	467	141	145	233		187	614	370	200	342.75	442	538	309	281	392.5						0.0269787	0.0234433	0.0300701	0.0137297	0.0235555	0.0184213	0.015626	0.0281944	0.010068	0.0180774		0.000270675	0.000777958	0.00077466	0.000260615	0.000520977	0.000497954	0.000424098	0.000710667	0.000299934	0.000483163
NM_198193	232	151	221	223	97	173	179	467	141	145	233		187	614	370	200	342.75	442	538	309	281	392.5						0.0269787	0.0234433	0.0300701	0.0137297	0.0235555	0.0184213	0.015626	0.0281944	0.010068	0.0180774		0.000270675	0.000777958	0.00077466	0.000260615	0.000520977	0.000497954	0.000424098	0.000710667	0.000299934	0.000483163
NM_001145897	1191	78	444	108	111	185.25	158	285	40	126	152.25		263	1224	97	550	533.5	352	635	33	550	392.5						0.013936	0.0470988	0.0145631	0.0157113	0.0228273	0.0162602	0.00953624	0.0079984	0.00874878	0.0106359		0.000380682	0.00155085	0.000203086	0.00071669	0.000712826	0.00039656	0.000500562	7.58964e-05	0.00058706	0.00039002
NM_031248	106	157	514	102	243	254	280	794	99	345	379.5		198	217	259	309	245.75	438	398	189	546	392.75						0.0280507	0.0545242	0.013754	0.0343949	0.032681	0.0288155	0.0265676	0.019796	0.023955	0.0247835		0.000286597	0.000274946	0.000542262	0.000402649	0.000376614	0.000493447	0.000313738	0.00043468	0.00058279	0.000456164
NM_019998	396	82	129	86	141	109.5	232	361	59	237	222.25		179	399	111	576	316.25	372	525	59	615	392.75						0.0146507	0.0136841	0.0115965	0.0199575	0.0149722	0.0238757	0.0120792	0.0117976	0.016456	0.0160522		0.000259095	0.000505546	0.000232398	0.00075057	0.000436902	0.000419092	0.00041385	0.000135694	0.00065644	0.000406269
NM_007622	166	74	132	144	79	107.25	352	386	97	165	250		161	428	87	307	245.75	347	418	153	654	393						0.0132214	0.0140023	0.0194175	0.0111819	0.0144558	0.0362252	0.0129157	0.0193961	0.0114567	0.0199984		0.000233041	0.00054229	0.00018215	0.000400043	0.000339381	0.000390927	0.000329504	0.000351883	0.000698068	0.000442596
NM_001145896	1194	78	447	108	111	186	158	285	40	127	152.5		263	1224	97	550	533.5	352	635	33	555	393.75						0.013936	0.047417	0.0145631	0.0157113	0.0229068	0.0162602	0.00953624	0.0079984	0.00881822	0.0106533		0.000380682	0.00155085	0.000203086	0.00071669	0.000712826	0.00039656	0.000500562	7.58964e-05	0.000592397	0.000391354
NM_198671	1204	78	449	108	111	186.5	158	285	40	127	152.5		263	1224	97	550	533.5	352	635	33	555	393.75						0.013936	0.0476292	0.0145631	0.0157113	0.0229599	0.0162602	0.00953624	0.0079984	0.00881822	0.0106533		0.000380682	0.00155085	0.000203086	0.00071669	0.000712826	0.00039656	0.000500562	7.58964e-05	0.000592397	0.000391354
NM_029495	295	92	193	152	192	157.25	253	412	96	258	254.75		292	164	224	278	239.5	510	446	208	417	395.25						0.0164374	0.0204731	0.0204962	0.0271762	0.0211457	0.0260368	0.0137857	0.0191962	0.0179142	0.0192332		0.000422659	0.000207793	0.000468983	0.000362254	0.000365422	0.000574562	0.000351576	0.000478378	0.000445098	0.000462403
NM_175046	1688	442	1834	423	359	764.5	65	224	64	82	108.75		5878	16026	2734	6281	7729.75	167	588	183	643	395.25						0.0789709	0.194548	0.0570388	0.0508139	0.0953428	0.00668931	0.00749515	0.0127974	0.00569365	0.00816889		0.00850817	0.0203055	0.00572411	0.0081846	0.0106806	0.000188141	0.000463512	0.00042088	0.000686326	0.000439715
NM_001168321	1688	442	1834	423	359	764.5	65	224	64	82	108.75		5878	16026	2734	6281	7729.75	167	588	183	643	395.25						0.0789709	0.194548	0.0570388	0.0508139	0.0953428	0.00668931	0.00749515	0.0127974	0.00569365	0.00816889		0.00850817	0.0203055	0.00572411	0.0081846	0.0106806	0.000188141	0.000463512	0.00042088	0.000686326	0.000439715
NM_001166138	380	85	122	86	126	104.75	180	401	76	204	215.25		90	218	86	394	197	263	596	115	608	395.5						0.0151867	0.0129416	0.0115965	0.0178344	0.0143898	0.0185242	0.0134177	0.015197	0.0141647	0.0153259		0.000130271	0.000276213	0.000180056	0.000513411	0.000274988	0.000296294	0.000469818	0.000264488	0.000648968	0.000419892
NM_027193	262	111	151	76	83	105.25	117	240	44	117	129.5		501	554	203	499	439.25	361	505	118	598	395.5						0.0198321	0.0160178	0.0102481	0.0117481	0.0144615	0.0120408	0.00803052	0.00879824	0.00812387	0.00924835		0.000725178	0.000701936	0.000425016	0.000650233	0.000625591	0.0004067	0.000398084	0.000271387	0.000638294	0.000428616
NM_172939	493	239	567	168	193	291.75	83	92	65	62	75.5		1359	1626	572	1194	1187.75	472	352	306	452	395.5						0.0427014	0.0601464	0.0226537	0.0273178	0.0382048	0.00854173	0.00307836	0.0129974	0.00430496	0.00723061		0.0019671	0.00206019	0.00119758	0.00155587	0.00169519	0.000531751	0.000277477	0.000703767	0.000482457	0.000498863
NM_025928	183	96	174	91	134	123.75	276	360	63	196	223.75		191	331	187	275	246	317	596	167	510	397.5						0.017152	0.0184576	0.0122708	0.0189667	0.0167118	0.0284038	0.0120458	0.0125975	0.0136092	0.0166641		0.000276465	0.000419388	0.000391517	0.000358345	0.000361429	0.00035713	0.000469818	0.000384082	0.000544365	0.000438849
NM_009117	103	1184	114	2065	877	1060	1119	441	3871	579	1502.5		124	0	543	1	167	72	2	1509	8	397.75						0.211542	0.0120929	0.278452	0.124133	0.156555	0.115159	0.0147561	0.774045	0.0402027	0.236041		0.000179485	0	0.00113687	1.30307e-06	0.000329413	8.11146e-05	1.57657e-06	0.00347054	8.53905e-06	0.000890442
NM_175001	187	78	161	73	146	114.5	174	492	103	201	242.5		95	288	214	308	226.25	294	640	109	553	399						0.013936	0.0170786	0.00984358	0.0206653	0.0153809	0.0179068	0.0164626	0.0205959	0.0139564	0.0172304		0.000137509	0.000364905	0.000448046	0.000401346	0.000337952	0.000331218	0.000504503	0.000250688	0.000590262	0.000419168
NM_009878	147	128	203	142	126	149.75	185	254	67	134	160		357	323	237	320	309.25	513	378	294	412	399.25						0.0228694	0.0215339	0.0191478	0.0178344	0.0203464	0.0190388	0.00849896	0.0133973	0.00930426	0.0125598		0.000516744	0.000409251	0.000496201	0.000416983	0.000459795	0.000577942	0.000297972	0.000676168	0.000439761	0.000497961
NM_175045	1706	443	1844	425	360	768	67	225	68	83	110.75		5924	16038	2743	6304	7752.25	170	611	183	637	400.25						0.0791495	0.195608	0.0573085	0.0509554	0.0957555	0.00689513	0.00752861	0.0135973	0.00576309	0.00844603		0.00857476	0.0203207	0.00574295	0.00821457	0.0107132	0.000191521	0.000481643	0.00042088	0.000679922	0.000443491
NM_173742	79	498	996	407	612	628.25	859	1784	301	837	945.25		276	678	187	290	357.75	390	529	134	553	401.5						0.0889762	0.105654	0.0548813	0.0866242	0.0840339	0.0884018	0.0596935	0.060188	0.0581169	0.0666		0.000399499	0.000859048	0.000391517	0.000377891	0.000506989	0.000439371	0.000417003	0.000308186	0.000590262	0.000438705
NM_001044384	186	492	767	63	390	428	362	445	99	100	251.5		1214	1144	235	1009	900.5	659	554	177	217	401.75						0.0879042	0.081362	0.00849515	0.0552017	0.0582408	0.0372543	0.0148899	0.019796	0.00694348	0.0197209		0.00175722	0.00144948	0.000492014	0.0013148	0.00125338	0.000742424	0.00043671	0.000407081	0.000231622	0.000454459
NM_011593	186	492	767	63	390	428	362	445	99	100	251.5		1214	1144	235	1009	900.5	659	554	177	217	401.75						0.0879042	0.081362	0.00849515	0.0552017	0.0582408	0.0372543	0.0148899	0.019796	0.00694348	0.0197209		0.00175722	0.00144948	0.000492014	0.0013148	0.00125338	0.000742424	0.00043671	0.000407081	0.000231622	0.000454459
NM_025389	65	83	209	50	154	124	126	206	26	140	124.5		297	369	332	240	309.5	598	460	278	273	402.25						0.0148294	0.0221704	0.00674218	0.0217976	0.0163849	0.012967	0.00689286	0.00519896	0.00972087	0.00869491		0.000429896	0.000467535	0.0006951	0.000312737	0.000476317	0.000673702	0.000362612	0.00063937	0.000291395	0.00049177
NM_001038230	65	83	209	50	154	124	126	206	26	140	124.5		297	369	332	240	309.5	598	460	278	273	402.25						0.0148294	0.0221704	0.00674218	0.0217976	0.0163849	0.012967	0.00689286	0.00519896	0.00972087	0.00869491		0.000429896	0.000467535	0.0006951	0.000312737	0.000476317	0.000673702	0.000362612	0.00063937	0.000291395	0.00049177
NM_016898	178	190	482	175	322	292.25	224	441	102	271	259.5		265	793	230	752	510	237	704	120	549	402.5						0.0339468	0.0511297	0.0235976	0.0455768	0.0385627	0.0230524	0.0147561	0.0203959	0.0188168	0.0192553		0.000383577	0.00100476	0.000481545	0.000979911	0.000712447	0.000267002	0.000554953	0.000275987	0.000585993	0.000420984
NM_013777	304	91	196	52	137	119	240	550	67	258	278.75		223	310	120	310	240.75	319	600	136	557	403						0.0162587	0.0207913	0.00701187	0.0193914	0.0158633	0.024699	0.0184033	0.0133973	0.0179142	0.0186034		0.000322784	0.00039278	0.000251241	0.000403952	0.000342689	0.000359383	0.000472972	0.000312785	0.000594532	0.000434918
NM_019502	81	77	179	51	131	109.5	157	422	40	191	202.5		251	219	247	140	214.25	425	617	200	371	403.25						0.0137574	0.018988	0.00687702	0.0185421	0.0145411	0.0161573	0.0141203	0.0079984	0.013262	0.0128845		0.000363313	0.00027748	0.000517138	0.00018243	0.00033509	0.000478801	0.000486373	0.000459978	0.000395999	0.000455288
NM_133346	399	104	232	94	137	141.75	214	433	90	153	222.5		239	243	171	358	252.75	385	496	181	551	403.25						0.0185814	0.0246102	0.0126753	0.0193914	0.0188146	0.0220233	0.0144884	0.0179964	0.0106235	0.0162829		0.000345943	0.000307889	0.000358018	0.0004665	0.000369588	0.000433738	0.00039099	0.00041628	0.000588127	0.000457284
NM_172588	442	138	220	121	96	143.75	126	152	39	60	94.25		723	612	286	475	524	651	415	128	420	403.5						0.0246561	0.0233372	0.0163161	0.0135881	0.0194744	0.012967	0.00508599	0.00779844	0.00416609	0.00750437		0.00104651	0.000775424	0.000598791	0.000618959	0.000759922	0.000733411	0.000327139	0.000294386	0.0004483	0.000450809
NM_001205081	623	78	274	68	107	131.75	92	268	44	120	131		362	614	220	569	441.25	281	659	72	607	404.75						0.013936	0.0290655	0.00916936	0.0151451	0.016829	0.00946794	0.00896741	0.00879824	0.00833218	0.00889144		0.000523981	0.000777958	0.000460609	0.000741448	0.000625999	0.000316572	0.000519481	0.000165592	0.000647901	0.000412386
NM_172734	445	297	355	289	122	265.75	109	180	75	87	112.75		1457	1217	461	651	946.5	485	396	214	526	405.25						0.0530641	0.0376578	0.0389698	0.0172682	0.03674	0.0112175	0.00602289	0.014997	0.00604083	0.00956954		0.00210895	0.00154198	0.000965184	0.0008483	0.0013661	0.000546397	0.000312161	0.000492177	0.000561443	0.000478044
NM_025450	101	69	151	84	132	109	222	491	53	222	247		141	362	194	314	252.75	292	649	227	456	406						0.012328	0.0160178	0.0113269	0.0186837	0.0145891	0.0228466	0.0164291	0.0105979	0.0154145	0.016322		0.000204092	0.000458666	0.000406173	0.000409165	0.000369524	0.000328965	0.000511598	0.000522076	0.000486726	0.000462341
NM_001252653	539	245	491	418	329	370.75	405	890	322	411	507		175	566	156	439	334	228	551	175	674	407						0.0437735	0.0520844	0.0563646	0.0465676	0.0496975	0.0416795	0.0297798	0.0643871	0.0285377	0.041096		0.000253306	0.00071714	0.000326613	0.000572049	0.000467277	0.000256863	0.000434346	0.000402481	0.000719415	0.000453276
NM_172965	1037	101	323	126	176	181.5	278	548	110	261	299.25		107	375	75	343	225	349	474	62	751	409						0.0180454	0.0342633	0.0169903	0.0249115	0.0235526	0.0286097	0.0183363	0.0219956	0.0181225	0.021766		0.000154878	0.000475137	0.000157026	0.000446954	0.000308499	0.000393181	0.000373648	0.000142593	0.000801604	0.000427756
NM_025365	55	90	430	92	242	213.5	208	1245	80	377	477.5		222	472	73	266	258.25	332	566	145	596	409.75						0.01608	0.0456137	0.0124056	0.0342534	0.0270882	0.0214058	0.0416583	0.0159968	0.0261769	0.0263095		0.000321336	0.000598039	0.000152838	0.000346617	0.000354708	0.000374028	0.00044617	0.000333484	0.000636159	0.000447461
NM_153570	497	56	185	100	151	123	235	524	139	249	286.75		245	481	195	470	347.75	306	633	155	545	409.75						0.0100054	0.0196245	0.0134844	0.021373	0.0161218	0.0241844	0.0175333	0.0277944	0.0172893	0.0217004		0.000354628	0.000609442	0.000408267	0.000612444	0.000496195	0.000344737	0.000498985	0.000356483	0.000581723	0.000445482
NM_030112	696	123	229	161	120	158.25	263	327	112	147	212.25		234	764	130	560	422	450	440	45	704	409.75						0.0219761	0.0242919	0.0217098	0.0169851	0.0212407	0.027066	0.0109416	0.0223955	0.0102069	0.0176525		0.000338706	0.000968013	0.000272178	0.000729721	0.000577154	0.000506966	0.000346846	0.000103495	0.000751437	0.000427186
NM_181281	300	126	189	213	213	185.25	323	691	154	263	357.75		125	360	112	450	261.75	291	659	140	550	410						0.0225121	0.0200488	0.0287217	0.0301486	0.0253578	0.0332407	0.0231212	0.0307938	0.0182614	0.0263543		0.000180933	0.000456132	0.000234492	0.000586383	0.000364485	0.000327838	0.000519481	0.000321985	0.00058706	0.000439091
NM_001008425	322	71	152	56	152	107.75	161	379	66	217	205.75		225	225	269	286	251.25	449	388	281	523	410.25						0.0126854	0.0161239	0.00755124	0.0215145	0.0144688	0.0165689	0.0126815	0.0131974	0.0150674	0.0143788		0.000325679	0.000285082	0.000563199	0.000372679	0.00038666	0.00050584	0.000305855	0.00064627	0.000558241	0.000504051
NM_172699	604	118	332	151	130	182.75	169	316	81	149	178.75		199	834	144	593	442.5	153	742	69	678	410.5						0.0210827	0.035218	0.0203614	0.0184006	0.0237657	0.0173922	0.0105735	0.0161968	0.0103458	0.0136271		0.000288045	0.0010567	0.000301489	0.000772722	0.00060474	0.000172369	0.000584908	0.000158693	0.000723685	0.000409914
NM_001164220	388	73	225	146	81	131.25	100	248	77	57	120.5		345	1200	360	878	695.75	271	749	251	372	410.75						0.0130427	0.0238676	0.0196872	0.011465	0.0170156	0.0102912	0.0082982	0.0153969	0.00395778	0.00948604		0.000499374	0.00152044	0.000753723	0.0011441	0.000979408	0.000305306	0.000590426	0.000577273	0.000397066	0.000467518
NM_023233	388	73	225	146	81	131.25	100	248	77	57	120.5		345	1200	360	878	695.75	271	749	251	372	410.75						0.0130427	0.0238676	0.0196872	0.011465	0.0170156	0.0102912	0.0082982	0.0153969	0.00395778	0.00948604		0.000499374	0.00152044	0.000753723	0.0011441	0.000979408	0.000305306	0.000590426	0.000577273	0.000397066	0.000467518
NM_001037913	223	67	178	99	76	105	90	251	45	83	117.25		333	331	416	185	316.25	397	524	396	334	412.75						0.0119707	0.0188819	0.0133495	0.0107573	0.0137399	0.00926212	0.00839858	0.0089982	0.00576309	0.0081055		0.000482004	0.000419388	0.000870969	0.000241068	0.000503357	0.000447257	0.000413062	0.000910757	0.000356505	0.000531895
NM_026097	316	135	405	139	120	199.75	38	66	34	20	39.5		1612	2241	824	1156	1458.25	411	545	275	421	413						0.0241201	0.0429617	0.0187433	0.0169851	0.0257025	0.00391067	0.00220839	0.00679864	0.0013887	0.0035766		0.00233331	0.00283942	0.00172519	0.00150635	0.00210107	0.000463029	0.000429616	0.00063247	0.000449368	0.000493621
NM_146176	732	89	161	139	135	131	210	320	85	149	191		278	422	140	375	303.75	448	390	97	719	413.5						0.0159014	0.0170786	0.0187433	0.0191083	0.0177079	0.0216116	0.0107074	0.0169966	0.0103458	0.0149153		0.000402394	0.000534688	0.000293115	0.000488652	0.000429712	0.000504713	0.000307432	0.00022309	0.000767447	0.00045067
NM_007899	540	248	493	425	332	374.5	415	897	326	415	513.25		175	564	157	444	335	232	557	178	687	413.5						0.0443095	0.0522966	0.0573085	0.0469922	0.0502267	0.0427087	0.0300141	0.065187	0.0288154	0.0416813		0.000253306	0.000714606	0.000328707	0.000578564	0.000468796	0.000261369	0.000439075	0.000409381	0.000733291	0.000460779
NM_001164729	55	90	430	92	242	213.5	208	1245	80	377	477.5		220	456	76	272	256	329	584	152	590	413.75						0.01608	0.0456137	0.0124056	0.0342534	0.0270882	0.0214058	0.0416583	0.0159968	0.0261769	0.0263095		0.000318441	0.000577767	0.000159119	0.000354436	0.000352441	0.000370649	0.000460359	0.000349584	0.000629755	0.000452587
NM_001253731	615	72	159	78	185	123.5	271	556	94	280	300.25		73	358	77	473	245.25	255	589	65	747	414						0.012864	0.0168664	0.0105178	0.0261854	0.0166084	0.0278893	0.018604	0.0187962	0.0194417	0.0211828		0.000105665	0.000453597	0.000161213	0.000616353	0.000334207	0.000287281	0.0004643	0.000149493	0.000797334	0.000424602
NM_010318	49	157	1435	186	797	643.75	205	1797	98	1008	777		120	725	286	686	454.25	106	640	234	678	414.5						0.0280507	0.152222	0.0250809	0.11281	0.0795409	0.021097	0.0601285	0.0195961	0.0699903	0.042703		0.000173695	0.000918598	0.000598791	0.000893908	0.000646248	0.000119419	0.000504503	0.000538175	0.000723685	0.000471445
NM_001161371	294	85	222	114	128	137.25	145	371	54	171	185.25		226	391	247	286	287.5	303	670	135	555	415.75						0.0151867	0.0235494	0.0153722	0.0181175	0.0180564	0.0149223	0.0124138	0.0107978	0.0118734	0.0125018		0.000327126	0.00049541	0.000517138	0.000372679	0.000428088	0.000341357	0.000528152	0.000310485	0.000592397	0.000443098
NM_010927	1125	487	145	295	211	284.5	440	69	1332	59	475		653	338	267	472	432.5	413	45	1079	127	416						0.0870109	0.0153814	0.0397789	0.0298655	0.0430092	0.0452815	0.00230877	0.266347	0.00409665	0.0795084		0.000945192	0.000428257	0.000559011	0.00061505	0.000636878	0.000465282	3.54729e-05	0.00248158	0.000135557	0.000779474
NM_175044	1722	446	1840	432	357	768.75	67	228	66	82	110.75		6292	16485	2852	6423	8013	192	615	195	662	416						0.0796855	0.195184	0.0582524	0.0505308	0.0959132	0.00689513	0.00762899	0.0131974	0.00569365	0.00835378		0.00910742	0.020887	0.00597116	0.00836963	0.0110838	0.000216306	0.000484796	0.000448479	0.000706607	0.000464047
NM_001042605	260	458	558	223	379	404.5	354	418	82	319	293.25		1053	685	285	941	741	356	430	147	739	418						0.0818296	0.0591917	0.0300701	0.0536447	0.056184	0.036431	0.0139865	0.0163967	0.0221497	0.022241		0.00152418	0.000867917	0.000596697	0.00122619	0.00105375	0.000401067	0.000338963	0.000338084	0.000788795	0.000466727
NM_139149	499	1109	2452	1278	1639	1619.5	2430	4773	1278	2020	2625.25		377	337	130	423	316.75	597	294	202	580	418.25						0.198142	0.260104	0.17233	0.231989	0.215641	0.250077	0.159707	0.255549	0.140258	0.201398		0.000545693	0.00042699	0.000272178	0.0005512	0.000449015	0.000672575	0.000231756	0.000464578	0.000619081	0.000496998
NM_181403	333	172	453	150	213	247	144	266	44	170	156		448	1002	346	831	656.75	362	512	219	584	419.25						0.0307307	0.0480535	0.0202265	0.0301486	0.0322898	0.0148194	0.00890049	0.00879824	0.0118039	0.0110805		0.000648462	0.00126957	0.000724412	0.00108285	0.000931323	0.000407826	0.000403602	0.000503676	0.000623351	0.000484614
NM_152220	270	125	226	114	70	133.75	61	68	42	35	51.5		617	990	659	435	675.25	486	548	213	436	420.75						0.0223334	0.0239737	0.0153722	0.009908	0.0178968	0.00627766	0.00227531	0.00839832	0.00243022	0.00484538		0.000893083	0.00125436	0.00137973	0.000566837	0.0010235	0.000547524	0.000431981	0.000489877	0.000465378	0.00048369
NM_029510	1740	447	1850	434	358	772.25	69	229	70	83	112.75		6338	16497	2861	6446	8035.5	195	638	195	656	421						0.0798642	0.196245	0.0585221	0.0506723	0.0963259	0.00710096	0.00766245	0.0139972	0.00576309	0.00863092		0.00917401	0.0209022	0.00599	0.00839961	0.0111165	0.000219685	0.000502927	0.000448479	0.000700202	0.000467823
NM_010358	199	341	350	212	325	307	546	546	100	475	416.75		343	424	123	604	373.5	397	511	113	664	421.25						0.0609255	0.0371274	0.0285868	0.0460014	0.0431603	0.0561902	0.0182694	0.019996	0.0329815	0.0318593		0.000496479	0.000537222	0.000257522	0.000787056	0.00051957	0.000447257	0.000402814	0.000259888	0.000708741	0.000454675
NM_001007465	344	137	414	139	123	203.25	41	68	35	23	41.75		1585	2162	851	1173	1442.75	414	575	265	433	421.75						0.0244774	0.0439164	0.0187433	0.0174098	0.0261367	0.00421941	0.00227531	0.0069986	0.001597	0.00377258		0.00229423	0.00273932	0.00178172	0.0015285	0.00208594	0.000466409	0.000453264	0.000609471	0.000462176	0.00049783
NM_001110152	115	133	277	205	136	187.75	298	601	173	198	317.5		282	262	207	230	245.25	367	724	293	304	422						0.0237627	0.0293837	0.0276429	0.0192498	0.0250098	0.0306679	0.0201098	0.0345931	0.0137481	0.0247797		0.000408184	0.000331962	0.000433391	0.000299707	0.000368311	0.000413459	0.000570719	0.000673868	0.000324484	0.000495633
NM_001164570	358	140	424	143	127	208.5	41	72	35	26	43.5		1595	2207	852	1188	1460.5	414	575	265	435	422.25						0.0250134	0.0449772	0.0192826	0.0179759	0.0268123	0.00421941	0.00240915	0.0069986	0.0018053	0.00385812		0.0023087	0.00279634	0.00178381	0.00154805	0.00210923	0.000466409	0.000453264	0.000609471	0.000464311	0.000498364
NM_001146085	676	108	147	101	73	107.25	133	163	66	44	101.5		526	483	259	452	430	463	558	158	512	422.75						0.0192961	0.0155935	0.0136192	0.0103326	0.0147103	0.0136874	0.00545406	0.0131974	0.00305513	0.00884848		0.000761364	0.000611976	0.000542262	0.000588989	0.000626148	0.000521612	0.000439864	0.000363383	0.000546499	0.000467839
NM_001146086	676	108	147	101	73	107.25	133	163	66	44	101.5		526	483	259	452	430	463	558	158	512	422.75						0.0192961	0.0155935	0.0136192	0.0103326	0.0147103	0.0136874	0.00545406	0.0131974	0.00305513	0.00884848		0.000761364	0.000611976	0.000542262	0.000588989	0.000626148	0.000521612	0.000439864	0.000363383	0.000546499	0.000467839
NM_001190853	195	91	298	122	148	164.75	111	302	59	147	154.75		516	734	293	430	493.25	455	525	278	434	423						0.0162587	0.0316113	0.0164509	0.0209483	0.0213173	0.0114233	0.0101051	0.0117976	0.0102069	0.0108832		0.00074689	0.000930002	0.000613447	0.000560321	0.000712665	0.000512599	0.00041385	0.00063937	0.000463244	0.000507266
NM_022554	220	105	327	141	159	183	124	331	62	165	170.5		528	734	294	430	496.5	456	525	278	434	423.25						0.0187601	0.0346876	0.0190129	0.0225053	0.0237415	0.0127611	0.0110754	0.0123975	0.0114567	0.0119227		0.000764259	0.000930002	0.000615541	0.000560321	0.000717531	0.000513726	0.00041385	0.00063937	0.000463244	0.000507547
NM_001190857	215	105	327	141	159	183	124	331	62	165	170.5		528	734	294	430	496.5	456	525	278	434	423.25						0.0187601	0.0346876	0.0190129	0.0225053	0.0237415	0.0127611	0.0110754	0.0123975	0.0114567	0.0119227		0.000764259	0.000930002	0.000615541	0.000560321	0.000717531	0.000513726	0.00041385	0.00063937	0.000463244	0.000507547
NM_133665	488	116	431	199	120	216.5	217	318	59	132	181.5		176	840	79	411	376.5	269	850	49	527	423.75						0.0207254	0.0457197	0.0268339	0.0169851	0.027566	0.022332	0.0106404	0.0117976	0.00916539	0.0134839		0.000254753	0.00106431	0.0001654	0.000535563	0.000505006	0.000303053	0.000670043	0.000112695	0.00056251	0.000412075
NM_001164569	379	140	425	145	127	209.25	41	73	35	27	44		1600	2218	852	1202	1468	418	575	265	438	424						0.0250134	0.0450833	0.0195523	0.0179759	0.0269062	0.00421941	0.00244262	0.0069986	0.00187474	0.00388384		0.00231594	0.00281028	0.00178381	0.00156629	0.00211908	0.000470915	0.000453264	0.000609471	0.000467513	0.000500291
NM_028189	353	124	291	123	156	173.5	233	413	97	183	231.5		160	489	278	396	330.75	363	571	195	569	424.5						0.0221547	0.0308688	0.0165858	0.0220807	0.0229225	0.0239786	0.0138192	0.0193961	0.0127066	0.0174751		0.000231594	0.000619579	0.000582042	0.000516017	0.000487308	0.000408953	0.000450111	0.000448479	0.00060734	0.000478721
NM_001098271	225	99	76	172	232	144.75	198	428	178	236	260		110	173	256	543	270.5	223	470	298	713	426						0.017688	0.00806195	0.0231931	0.0328379	0.0204453	0.0203767	0.0143211	0.0355929	0.0163866	0.0216693		0.000159221	0.000219197	0.000535981	0.000707568	0.000405492	0.00025123	0.000370494	0.000685368	0.000761043	0.000517034
NM_025326	225	99	76	172	232	144.75	198	428	178	236	260		110	173	256	543	270.5	223	470	298	713	426						0.017688	0.00806195	0.0231931	0.0328379	0.0204453	0.0203767	0.0143211	0.0355929	0.0163866	0.0216693		0.000159221	0.000219197	0.000535981	0.000707568	0.000405492	0.00025123	0.000370494	0.000685368	0.000761043	0.000517034
NM_028696	179	148	106	89	67	102.5	83	142	52	60	84.25		1200	416	369	292	569.25	712	347	338	307	426						0.0264427	0.0112443	0.0120011	0.00948337	0.0147929	0.00854173	0.00475139	0.0103979	0.00416609	0.00696428		0.00173695	0.000527085	0.000772566	0.000380497	0.000854275	0.000802133	0.000273535	0.000777364	0.000327686	0.00054518
NM_001164205	268	54	195	51	121	105.25	247	400	58	174	219.75		181	328	175	292	244	506	600	216	385	426.75						0.00964803	0.0206853	0.00687702	0.0171267	0.0135842	0.0254194	0.0133842	0.0115977	0.0120817	0.0156207		0.00026199	0.000415587	0.000366393	0.000380497	0.000356117	0.000570055	0.000472972	0.000496777	0.000410942	0.000487686
NM_016923	141	59	224	90	137	127.5	118	366	65	148	174.25		335	494	227	545	400.25	282	757	258	421	429.5						0.0105414	0.0237615	0.0121359	0.0193914	0.0164575	0.0121437	0.0122465	0.0129974	0.0102764	0.011916		0.000484899	0.000625914	0.000475264	0.000710175	0.000574063	0.000317699	0.000596733	0.000593372	0.000449368	0.000489293
NM_023835	278	116	76	110	151	113.25	218	354	61	190	205.75		387	237	186	333	285.75	462	605	159	499	431.25						0.0207254	0.00806195	0.0148328	0.021373	0.0162483	0.0224349	0.011845	0.0121976	0.0131926	0.0149175		0.000560167	0.000300287	0.000389424	0.000433923	0.00042095	0.000520485	0.000476913	0.000365683	0.000532623	0.000473926
NM_030236	727	108	150	102	74	108.5	135	167	67	48	104.25		526	508	266	473	443.25	463	580	160	524	431.75						0.0192961	0.0159117	0.013754	0.0104742	0.014859	0.0138932	0.0055879	0.0133973	0.00333287	0.00905282		0.000761364	0.000643652	0.000556918	0.000616353	0.000644572	0.000521612	0.000457206	0.000367983	0.000559308	0.000476527
NM_133626	682	808	934	1305	967	1003.5	1331	1803	919	1107	1290		322	248	175	503	312	519	262	183	764	432						0.144363	0.0990771	0.175971	0.136872	0.139071	0.136976	0.0603293	0.183763	0.0768643	0.114483		0.000466082	0.000314224	0.000366393	0.000655445	0.000450536	0.000584701	0.000206531	0.00042088	0.00081548	0.000506898
NM_010128	141	568	2095	666	1244	1143.25	732	2686	391	1379	1297		478	990	236	741	611.25	305	500	247	683	433.75						0.101483	0.222234	0.0898058	0.176079	0.147401	0.0753319	0.0898749	0.0781844	0.0957506	0.0847854		0.000691886	0.00125436	0.000494107	0.000965577	0.000851483	0.00034361	0.000394143	0.000568073	0.000729022	0.000508712
NM_011284	251	95	166	104	113	119.5	214	409	69	170	215.5		237	483	131	436	321.75	329	673	172	562	434						0.0169734	0.017609	0.0140237	0.0159943	0.0161501	0.0220233	0.0136853	0.0137972	0.0118039	0.0153274		0.000343048	0.000611976	0.000274271	0.00056814	0.000449359	0.000370649	0.000530517	0.000395581	0.000599868	0.000474154
NM_007396	494	97	237	139	94	141.75	60	167	45	38	77.5		358	1159	303	808	657	231	825	93	589	434.5						0.0173307	0.0251406	0.0187433	0.013305	0.0186299	0.00617475	0.0055879	0.0089982	0.00263852	0.00584984		0.000518191	0.00146849	0.000634384	0.00105288	0.000918487	0.000260243	0.000650336	0.00021389	0.000628688	0.000438289
NM_010751	208	222	454	176	122	243.5	41	78	19	36	43.5		2436	1825	1027	1039	1581.75	554	468	291	425	434.5						0.0396641	0.0481595	0.0237325	0.0172682	0.0322061	0.00421941	0.00260992	0.00379924	0.00249965	0.00328205		0.00352601	0.00231233	0.0021502	0.00135389	0.00233561	0.000624132	0.000368918	0.000669269	0.000453637	0.000528989
NM_001167767	217	77	118	61	158	103.5	166	476	65	231	234.5		144	324	117	375	240	446	613	115	565	434.75						0.0137574	0.0125172	0.00822546	0.0223638	0.014216	0.0170835	0.0159272	0.0129974	0.0160394	0.0155119		0.000208434	0.000410518	0.00024496	0.000488652	0.000338141	0.00050246	0.000483219	0.000264488	0.000603071	0.000463309
NM_001012309	523	114	227	159	119	154.75	174	370	115	163	205.5		498	443	173	171	321.25	729	433	172	405	434.75						0.0203681	0.0240798	0.0214401	0.0168436	0.0206829	0.0179068	0.0123804	0.0229954	0.0113179	0.0161501		0.000720835	0.000561295	0.000362206	0.000222825	0.00046679	0.000821285	0.000341328	0.000395581	0.00043229	0.000497621
NM_018759	561	101	237	112	101	137.75	180	356	88	165	197.25		395	565	115	248	330.75	577	457	151	558	435.75						0.0180454	0.0251406	0.0151025	0.0142958	0.0181461	0.0185242	0.0119119	0.0175965	0.0114567	0.0148723		0.000571747	0.000715873	0.000240773	0.000323162	0.000462889	0.000650043	0.000360247	0.000347284	0.000595599	0.000488293
NM_026407	467	868	1585	365	269	771.75	58	120	42	55	68.75		4581	6082	1547	1667	3469.25	373	618	185	567	435.75						0.155083	0.168134	0.0492179	0.038075	0.102628	0.00596892	0.00401526	0.00839832	0.00381891	0.00555035		0.00663082	0.00770609	0.00323892	0.00217222	0.00493701	0.000420219	0.000487161	0.00042548	0.000605205	0.000484516
NM_001205286	467	868	1585	365	269	771.75	58	120	42	55	68.75		4581	6082	1547	1667	3469.25	373	618	185	567	435.75						0.155083	0.168134	0.0492179	0.038075	0.102628	0.00596892	0.00401526	0.00839832	0.00381891	0.00555035		0.00663082	0.00770609	0.00323892	0.00217222	0.00493701	0.000420219	0.000487161	0.00042548	0.000605205	0.000484516
NM_145545	619	164	198	180	344	221.5	151	286	119	177	183.25		491	496	315	1179	620.25	372	513	173	688	436.5						0.0293014	0.0210035	0.0242718	0.0486907	0.0308169	0.0155398	0.0095697	0.0237952	0.01229	0.0152987		0.000710703	0.000628448	0.000659508	0.00153632	0.000883745	0.000419092	0.000404391	0.000397881	0.000734359	0.000488931
NM_001083312	619	164	198	180	344	221.5	151	286	119	177	183.25		491	496	315	1179	620.25	372	513	173	688	436.5						0.0293014	0.0210035	0.0242718	0.0486907	0.0308169	0.0155398	0.0095697	0.0237952	0.01229	0.0152987		0.000710703	0.000628448	0.000659508	0.00153632	0.000883745	0.000419092	0.000404391	0.000397881	0.000734359	0.000488931
NM_172570	622	80	274	64	109	131.75	92	268	44	121	131.25		381	671	232	583	466.75	296	674	75	702	436.75						0.0142934	0.0290655	0.00862999	0.0154282	0.0168542	0.00946794	0.00896741	0.00879824	0.00840161	0.0089088		0.000551483	0.000850179	0.000485733	0.000759691	0.000661771	0.000333471	0.000531305	0.000172492	0.000749302	0.000446642
NM_026693	98	199	677	222	295	348.25	405	953	140	379	469.25		381	513	264	430	397	557	486	321	384	437						0.0355548	0.071815	0.0299353	0.0417551	0.044765	0.0416795	0.0318878	0.0279944	0.0263158	0.0319694		0.000551483	0.000649987	0.00055273	0.000560321	0.00057863	0.000627512	0.000383107	0.000738265	0.000409875	0.00053969
NM_023626	402	124	144	121	72	115.25	97	171	43	65	94		596	606	321	495	504.5	432	639	167	512	437.5						0.0221547	0.0152753	0.0163161	0.0101911	0.0159843	0.0099825	0.00572174	0.00859828	0.00451326	0.00720395		0.000862687	0.000767821	0.00067207	0.000645021	0.0007369	0.000486688	0.000503715	0.000384082	0.000546499	0.000480246
NM_001109971	49	292	884	329	751	564	588	1757	233	1208	946.5		413	259	379	319	342.5	491	476	453	334	438.5						0.0521708	0.0937732	0.0443635	0.106299	0.0741516	0.0605125	0.0587901	0.0465907	0.0838772	0.0624426		0.000597801	0.000328161	0.000793503	0.00041568	0.000533786	0.000553157	0.000375224	0.00104185	0.000356505	0.000581684
NM_001109972	49	292	884	329	751	564	588	1757	233	1208	946.5		413	259	379	319	342.5	491	476	453	334	438.5						0.0521708	0.0937732	0.0443635	0.106299	0.0741516	0.0605125	0.0587901	0.0465907	0.0838772	0.0624426		0.000597801	0.000328161	0.000793503	0.00041568	0.000533786	0.000553157	0.000375224	0.00104185	0.000356505	0.000581684
NM_001110267	94	173	171	77	92	128.25	271	220	44	102	159.25		303	351	73	191	229.5	762	523	85	388	439.5						0.0309094	0.0181394	0.010383	0.0130219	0.0181134	0.0278893	0.00736131	0.00879824	0.00708235	0.0127828		0.000438581	0.000444728	0.000152838	0.000248887	0.000321259	0.000858463	0.000412274	0.000195491	0.000414144	0.000470093
NM_025417	180	95	232	86	166	144.75	185	464	67	219	233.75		234	310	170	401	278.75	337	687	215	520	439.75						0.0169734	0.0246102	0.0115965	0.0234961	0.019169	0.0190388	0.0155257	0.0133973	0.0152062	0.015792		0.000338706	0.00039278	0.000355925	0.000522532	0.000402486	0.000379661	0.000541553	0.000494477	0.000555038	0.000492682
NM_001163515	297	168	222	71	55	129	109	119	36	65	82.25		798	1430	314	702	811	409	662	124	565	440						0.0300161	0.0235494	0.00957389	0.00778485	0.0177311	0.0112175	0.0039818	0.00719856	0.00451326	0.00672777		0.00115507	0.00181186	0.000657414	0.000914757	0.00113478	0.000460776	0.000521845	0.000285187	0.000603071	0.00046772
NM_026362	128	126	184	83	176	142.25	243	411	75	225	238.5		392	374	290	437	373.25	620	494	304	344	440.5						0.0225121	0.0195184	0.011192	0.0249115	0.0195335	0.0250077	0.0137523	0.014997	0.0156228	0.017345		0.000567405	0.00047387	0.000607166	0.000569443	0.000554471	0.000698487	0.000389413	0.000699167	0.000367179	0.000538562
NM_007533	427	69	172	76	125	110.5	142	400	65	181	197		160	426	228	346	290	420	585	226	533	441						0.012328	0.0182455	0.0102481	0.0176929	0.0146286	0.0146136	0.0133842	0.0129974	0.0125677	0.0133907		0.000231594	0.000539756	0.000477358	0.000450863	0.000424893	0.000473169	0.000461147	0.000519776	0.000568914	0.000505751
NM_152806	251	118	325	158	158	189.75	400	964	120	210	423.5		161	253	104	262	195	460	712	132	470	443.5						0.0210827	0.0344754	0.0213053	0.0223638	0.0248068	0.041165	0.0322559	0.0239952	0.0145813	0.0279993		0.000233041	0.000320559	0.000217742	0.000341405	0.000278187	0.000518232	0.00056126	0.000303586	0.000501669	0.000471187
NM_019402	283	85	128	102	133	112	217	354	116	195	220.5		152	415	59	524	287.5	291	602	128	755	444						0.0151867	0.013578	0.013754	0.0188252	0.015336	0.022332	0.011845	0.0231954	0.0135398	0.017728		0.000220014	0.000525818	0.000123527	0.00068281	0.000388042	0.000327838	0.000474548	0.000294386	0.000805873	0.000475661
NM_133763	309	99	287	121	142	162.25	152	319	63	135	167.25		702	429	246	404	445.25	717	429	253	380	444.75						0.017688	0.0304445	0.0163161	0.0200991	0.0211369	0.0156427	0.0106739	0.0125975	0.0093737	0.0120719		0.00101612	0.000543557	0.000515044	0.000526441	0.00065029	0.000807766	0.000338175	0.000581873	0.000405605	0.000533355
NM_026040	422	57	153	132	98	110	146	356	102	136	185		188	395	295	385	315.75	305	647	265	565	445.5						0.010184	0.01623	0.0177994	0.0138712	0.0145211	0.0150252	0.0119119	0.0203959	0.00944313	0.014194		0.000272123	0.000500478	0.000617634	0.000501683	0.000472979	0.00034361	0.000510021	0.000609471	0.000603071	0.000516543
NM_001110310	143	95	370	156	202	205.75	218	770	119	318	356.25		231	371	321	417	335	463	493	313	513	445.5						0.0169734	0.039249	0.0210356	0.0285916	0.0264624	0.0224349	0.0257646	0.0237952	0.0220803	0.0235187		0.000334363	0.000470069	0.00067207	0.000543381	0.000504971	0.000521612	0.000388625	0.000719866	0.000547567	0.000544418
NM_026735	197	189	403	230	221	260.75	235	550	140	289	303.5		195	718	155	683	437.75	391	720	100	571	445.5						0.0337681	0.0427495	0.031014	0.031281	0.0347032	0.0241844	0.0184033	0.0279944	0.0200667	0.0226622		0.000282255	0.000909729	0.00032452	0.000889999	0.000601626	0.000440497	0.000567566	0.000229989	0.000609475	0.000461882
NM_172635	751	115	349	175	137	194	150	292	102	109	163.25		583	1250	250	900	745.75	324	600	106	755	446.25						0.0205467	0.0370213	0.0235976	0.0193914	0.0251393	0.0154369	0.00977046	0.0203959	0.00756839	0.0132929		0.00084387	0.00158379	0.000523419	0.00117277	0.00103096	0.000365016	0.000472972	0.000243789	0.000805873	0.000471912
NM_001110311	151	96	377	159	203	208.75	225	781	120	318	361		230	371	317	415	333.25	460	505	309	513	446.75						0.017152	0.0399915	0.0214401	0.0287332	0.0268292	0.0231553	0.0261326	0.0239952	0.0220803	0.0238408		0.000332916	0.000470069	0.000663695	0.000540775	0.000501864	0.000518232	0.000398084	0.000710667	0.000547567	0.000543638
NM_026756	409	69	209	86	94	114.5	145	289	52	168	163.5		156	494	72	439	290.25	367	591	42	788	447						0.012328	0.0221704	0.0115965	0.013305	0.01485	0.0149223	0.00967008	0.0103979	0.011665	0.0116638		0.000225804	0.000625914	0.000150745	0.000572049	0.000393628	0.000413459	0.000465877	9.65955e-05	0.000841097	0.000454257
NM_008688	420	69	209	86	99	115.75	145	294	52	172	165.75		156	497	72	452	294.25	367	591	42	788	447						0.012328	0.0221704	0.0115965	0.0140127	0.0150269	0.0149223	0.00983738	0.0103979	0.0119428	0.0117751		0.000225804	0.000629715	0.000150745	0.000588989	0.000398813	0.000413459	0.000465877	9.65955e-05	0.000841097	0.000454257
NM_001039368	80	71	241	85	141	134.5	171	529	88	242	257.5		288	336	381	380	346.25	483	563	428	315	447.25						0.0126854	0.0255649	0.0114617	0.0199575	0.0174174	0.017598	0.0177006	0.0175965	0.0168032	0.0174246		0.000416869	0.000425723	0.00079769	0.000495168	0.000533862	0.000544144	0.000443805	0.000984354	0.000336225	0.000577132
NM_001110824	666	161	698	231	159	312.25	110	238	188	63	149.75		670	4347	285	1467	1692.25	171	834	149	639	448.25						0.0287654	0.0740426	0.0311489	0.0225053	0.0391156	0.0113204	0.00796359	0.0375925	0.00437439	0.0153127		0.000969799	0.00550779	0.000596697	0.00191161	0.00224647	0.000192647	0.000657431	0.000342684	0.000682057	0.000468705
NM_009338	378	114	116	77	111	104.5	284	382	95	175	234		345	240	175	445	301.25	568	375	274	577	448.5						0.0203681	0.0123051	0.010383	0.0157113	0.0146918	0.0292271	0.0127819	0.0189962	0.0121511	0.0182891		0.000499374	0.000304088	0.000366393	0.000579867	0.000437431	0.000639904	0.000295607	0.00063017	0.000615879	0.00054539
NM_001110825	654	163	699	231	160	313.25	112	241	196	64	153.25		675	4362	285	1470	1698	171	834	149	648	450.5						0.0291227	0.0741487	0.0311489	0.0226469	0.0392668	0.0115262	0.00806398	0.0391922	0.00444383	0.0158065		0.000977036	0.00552679	0.000596697	0.00191552	0.00225401	0.000192647	0.000657431	0.000342684	0.000691663	0.000471106
NM_026560	270	163	223	163	210	189.75	343	633	155	353	371		237	196	248	259	235	532	369	322	581	451						0.0291227	0.0236555	0.0219795	0.029724	0.0261204	0.035299	0.0211805	0.0309938	0.0245105	0.0279959		0.000343048	0.000248338	0.000519231	0.000337496	0.000362028	0.000599347	0.000290878	0.000740565	0.000620149	0.000562735
NM_001163514	311	169	228	75	55	131.75	111	119	38	66	83.5		807	1521	328	730	846.5	414	701	124	566	451.25						0.0301947	0.0241858	0.0101133	0.00778485	0.0180697	0.0114233	0.0039818	0.00759848	0.0045827	0.00689656		0.0011681	0.00192716	0.000686725	0.000951243	0.00118331	0.000466409	0.000552589	0.000285187	0.000604138	0.000477081
NM_021388	311	169	228	75	55	131.75	111	119	38	66	83.5		807	1521	328	730	846.5	414	701	124	566	451.25						0.0301947	0.0241858	0.0101133	0.00778485	0.0180697	0.0114233	0.0039818	0.00759848	0.0045827	0.00689656		0.0011681	0.00192716	0.000686725	0.000951243	0.00118331	0.000466409	0.000552589	0.000285187	0.000604138	0.000477081
NM_001165971	301	1062	1778	1510	1325	1418.75	2325	4522	1105	1814	2441.5		360	400	165	299	306	594	336	214	662	451.5						0.189745	0.188607	0.203614	0.187544	0.192377	0.239271	0.151308	0.220956	0.125955	0.184373		0.000521086	0.000506813	0.000345456	0.000389619	0.000440743	0.000669195	0.000264864	0.000492177	0.000706607	0.000533211
NM_026186	397	147	253	89	67	139	113	215	75	124	131.75		546	723	347	435	512.75	551	545	208	503	451.75						0.0262641	0.0268378	0.0120011	0.00948337	0.0186466	0.0116291	0.007194	0.014997	0.00860992	0.0106075		0.000790314	0.000916064	0.000726505	0.000566837	0.00074993	0.000620752	0.000429616	0.000478378	0.000536893	0.00051641
NM_024433	264	49	229	134	204	154	197	792	68	277	333.5		154	379	140	413	271.5	262	735	158	653	452						0.00875469	0.0242919	0.018069	0.0288747	0.0199976	0.0202737	0.0265007	0.0135973	0.0192334	0.0199013		0.000222909	0.000480205	0.000293115	0.000538169	0.000383599	0.000295167	0.00057939	0.000363383	0.000697	0.000483735
NM_172735	462	68	168	117	133	121.5	141	343	82	140	176.5		293	539	233	557	405.5	330	742	243	494	452.25						0.0121494	0.0178212	0.0157767	0.0188252	0.0161431	0.0145107	0.0114769	0.0163967	0.00972087	0.0130263		0.000424106	0.00068293	0.000487826	0.000725811	0.000580169	0.000371775	0.000584908	0.000558874	0.000527287	0.000510711
NM_028767	653	160	701	229	159	312.25	112	241	196	64	153.25		676	4359	285	1460	1695	171	847	145	647	452.5						0.0285867	0.0743609	0.0308792	0.0225053	0.039083	0.0115262	0.00806398	0.0391922	0.00444383	0.0158065		0.000978483	0.00552299	0.000596697	0.00190249	0.00225016	0.000192647	0.000667678	0.000333484	0.000690596	0.000471101
NM_021394	392	103	57	153	252	141.25	150	282	105	178	178.75		311	206	352	657	381.5	439	563	283	527	453						0.0184027	0.00604646	0.0206311	0.0356688	0.0201873	0.0154369	0.00943586	0.0209958	0.0123594	0.014557		0.00045016	0.000261009	0.000736974	0.000856119	0.000576065	0.000494574	0.000443805	0.000650869	0.00056251	0.00053794
NM_153419	427	68	230	108	108	128.5	125	454	61	182	205.5		183	386	301	399	317.25	282	677	252	609	455						0.0121494	0.024398	0.0145631	0.0152866	0.0165993	0.0128641	0.0151911	0.0121976	0.0126371	0.0132225		0.000264885	0.000489074	0.000630196	0.000519926	0.00047602	0.000317699	0.00053367	0.000579573	0.000650035	0.000520244
NM_011546	1098	171	399	208	93	217.75	61	73	38	16	47		1674	3055	584	1619	1733	653	709	150	308	455						0.0305521	0.0423252	0.0280475	0.0131635	0.0285221	0.00627766	0.00244262	0.00759848	0.00111096	0.00435743		0.00242305	0.00387078	0.00122271	0.00210967	0.00240655	0.000735664	0.000558895	0.000344984	0.000328754	0.000492074
NM_025564	129	91	78	162	79	102.5	187	244	119	99	162.25		358	255	447	177	309.25	574	418	570	259	455.25						0.0162587	0.00827411	0.0218447	0.0111819	0.0143898	0.0192446	0.00816436	0.0237952	0.00687405	0.0145196		0.000518191	0.000323093	0.000935873	0.000230644	0.00050195	0.000646664	0.000329504	0.00131094	0.000276452	0.000640889
NM_201357	367	84	189	76	116	116.25	207	344	69	154	193.5		299	428	212	437	344	516	590	204	511	455.25						0.015008	0.0200488	0.0102481	0.016419	0.015431	0.0213029	0.0115104	0.0137972	0.010693	0.0143259		0.000432791	0.00054229	0.000443859	0.000569443	0.000497096	0.000581321	0.000465089	0.000469178	0.000545432	0.000515255
NM_080462	276	116	164	82	102	116	221	431	52	151	213.75		242	503	156	566	366.75	383	950	112	378	455.75						0.0207254	0.0173968	0.0110572	0.0144374	0.0159042	0.0227436	0.0144215	0.0103979	0.0104847	0.0145119		0.000350286	0.000637317	0.000326613	0.000737539	0.000512939	0.000431485	0.000748872	0.000257588	0.00040347	0.000460354
NM_009848	491	313	289	110	215	231.75	355	279	69	196	224.75		758	637	362	648	601.25	548	561	134	586	457.25						0.0559228	0.0306566	0.0148328	0.0304317	0.032961	0.0365339	0.00933547	0.0137972	0.0136092	0.018319		0.00109718	0.000807099	0.00075791	0.000844391	0.000876644	0.000617372	0.000442228	0.000308186	0.000625486	0.000498318
NM_010315	52	63	237	87	113	125	237	459	59	196	237.75		296	368	195	277	284	393	604	228	610	458.75						0.011256	0.0251406	0.0117314	0.0159943	0.0160306	0.0243902	0.0153584	0.0117976	0.0136092	0.0162889		0.000428448	0.000466268	0.000408267	0.000360951	0.000415983	0.000442751	0.000476125	0.000524375	0.000651103	0.000523588
NM_001038637	52	63	237	87	113	125	237	459	59	196	237.75		296	368	195	277	284	393	604	228	610	458.75						0.011256	0.0251406	0.0117314	0.0159943	0.0160306	0.0243902	0.0153584	0.0117976	0.0136092	0.0162889		0.000428448	0.000466268	0.000408267	0.000360951	0.000415983	0.000442751	0.000476125	0.000524375	0.000651103	0.000523588
NM_194069	146	84	279	92	318	193.25	284	1022	102	482	472.5		327	257	147	385	279	417	520	176	723	459						0.015008	0.0295958	0.0124056	0.0450106	0.025505	0.0292271	0.0341966	0.0203959	0.0334676	0.0293218		0.00047332	0.000325627	0.00030777	0.000501683	0.0004021	0.000469789	0.000409909	0.000404781	0.000771717	0.000514049
NM_144527	742	102	269	66	103	135	94	189	53	102	109.5		783	661	601	526	642.75	518	483	370	467	459.5						0.018224	0.0285351	0.00889968	0.0145789	0.0175594	0.00967377	0.00632403	0.0105979	0.00708235	0.00841951		0.00113336	0.000837508	0.0012583	0.000685416	0.000978646	0.000583575	0.000380742	0.00085096	0.000498467	0.000578436
NM_001033225	278	758	2163	753	563	1059.25	233	415	182	145	243.75		890	3019	484	1386	1444.75	258	781	176	623	459.5						0.13543	0.229447	0.101537	0.0796886	0.136526	0.0239786	0.0138861	0.0363927	0.010068	0.0210814		0.00128824	0.00382517	0.00101334	0.00180606	0.0019832	0.000290661	0.000615651	0.000404781	0.000664979	0.000494018
NM_001166546	99	221	1121	215	377	483.5	408	2579	140	823	987.5		300	626	182	335	360.75	529	796	116	400	460.25						0.0394854	0.118914	0.0289914	0.0533616	0.0601881	0.0419883	0.0862946	0.0279944	0.0571448	0.0533555		0.000434238	0.000793162	0.000381049	0.000436529	0.000511245	0.000595967	0.000627476	0.000266787	0.000426953	0.000479296
NM_001025599	526	99	104	84	124	102.75	144	242	69	136	147.75		303	350	190	453	324	367	628	190	659	461						0.017688	0.0110321	0.0113269	0.0175513	0.0143996	0.0148194	0.00809744	0.0137972	0.00944313	0.0115393		0.000438581	0.000443461	0.000397798	0.000590292	0.000467533	0.000413459	0.000495044	0.00043698	0.000703405	0.000512222
NM_001001738	536	158	129	83	68	109.5	166	177	95	73	127.75		852	511	327	432	530.5	628	526	296	396	461.5						0.0282294	0.0136841	0.011192	0.00962491	0.0156826	0.0170835	0.00592251	0.0189962	0.00506874	0.0117677		0.00123324	0.000647453	0.000684632	0.000562927	0.000782062	0.0007075	0.000414638	0.000680768	0.000422683	0.000556397
NM_007548	804	480	1281	521	515	699.25	161	452	120	186	229.75		1010	2576	577	2244	1601.75	291	705	168	685	462.25						0.0857602	0.135886	0.0702535	0.0728946	0.0911986	0.0165689	0.0151241	0.0239952	0.0129149	0.0171508		0.00146194	0.00326387	0.00120805	0.00292409	0.00221449	0.000327838	0.000555742	0.000386382	0.000731156	0.00050028
NM_001122873	361	93	222	111	149	143.75	271	527	90	253	285.25		159	604	177	510	362.5	396	619	120	716	462.75						0.016616	0.0235494	0.0149676	0.0210899	0.0190557	0.0278893	0.0176337	0.0179964	0.017567	0.0202716		0.000230146	0.000765287	0.000370581	0.000664567	0.000507645	0.00044613	0.000487949	0.000275987	0.000764245	0.000493578
NM_027086	361	93	222	111	149	143.75	271	527	90	253	285.25		159	604	177	510	362.5	396	619	120	716	462.75						0.016616	0.0235494	0.0149676	0.0210899	0.0190557	0.0278893	0.0176337	0.0179964	0.017567	0.0202716		0.000230146	0.000765287	0.000370581	0.000664567	0.000507645	0.00044613	0.000487949	0.000275987	0.000764245	0.000493578
NM_025498	82	184	403	149	230	241.5	308	653	100	288	337.25		433	532	358	406	432.25	467	641	173	570	462.75						0.0328748	0.0427495	0.0200917	0.0325548	0.0320677	0.031697	0.0218497	0.019996	0.0199972	0.023385		0.000626751	0.000674061	0.000749536	0.000529047	0.000644849	0.000526118	0.000505291	0.000397881	0.000608408	0.000509425
NM_026242	106	125	366	183	209	220.75	219	799	83	267	342		133	334	196	286	237.25	351	698	231	574	463.5						0.0223334	0.0388247	0.0246764	0.0295824	0.0288542	0.0225378	0.0267349	0.0165967	0.0185391	0.0211021		0.000192512	0.000423189	0.00041036	0.000372679	0.000349685	0.000395434	0.000550224	0.000531275	0.000612677	0.000522402
NM_023377	194	85	151	97	147	120	185	313	155	140	198.25		229	338	304	489	340	430	504	468	454	464						0.0151867	0.0160178	0.0130798	0.0208068	0.0162728	0.0190388	0.0104731	0.0309938	0.00972087	0.0175567		0.000331469	0.000428257	0.000636477	0.000637202	0.000508351	0.000484434	0.000397296	0.00107635	0.000484591	0.000610668
NM_010545	196	464	559	210	363	399	360	420	77	314	292.75		1100	819	285	1018	805.5	373	480	154	849	464						0.0829016	0.0592978	0.0283172	0.05138	0.0554741	0.0370485	0.0140534	0.0153969	0.0218025	0.0220753		0.00159221	0.0010377	0.000596697	0.00132653	0.00113828	0.000420219	0.000378377	0.000354183	0.000906207	0.000514747
NM_181280	355	132	204	224	229	197.25	349	730	162	292	383.25		160	417	112	498	296.75	344	732	176	607	464.75						0.0235841	0.02164	0.030205	0.0324133	0.0269606	0.0359164	0.0244262	0.0323935	0.020275	0.0282528		0.000231594	0.000528352	0.000234492	0.00064893	0.000410842	0.000387548	0.000577025	0.000404781	0.000647901	0.000504314
NM_009744	688	110	141	144	124	129.75	718	996	147	515	594		83	161	35	205	121	427	655	111	673	466.5						0.0196534	0.014957	0.0194175	0.0175513	0.0178948	0.0738911	0.0333266	0.0293941	0.0357589	0.0430927		0.000120139	0.000203992	7.32786e-05	0.00026713	0.000166135	0.000481055	0.000516327	0.000255288	0.000718348	0.000492754
NM_018819	90	118	479	91	280	242	201	720	44	376	335.25		193	524	225	527	367.25	305	833	161	570	467.25						0.0210827	0.0508115	0.0122708	0.039632	0.0309492	0.0206854	0.0240915	0.00879824	0.0261075	0.0199207		0.00027936	0.000663925	0.000471077	0.000686719	0.00052527	0.00034361	0.000656642	0.000370283	0.000608408	0.000494736
NM_010500	289	628	1627	489	576	830	283	690	141	274	347		1684	2470	1043	1490	1671.75	389	673	176	634	468						0.112203	0.172589	0.0659385	0.0815287	0.108065	0.0291242	0.0230877	0.0281944	0.0190251	0.0248579		0.00243752	0.00312957	0.0021837	0.00194158	0.00242309	0.000438244	0.000530517	0.000404781	0.00067672	0.000512565
NM_172502	619	96	152	79	89	104	145	261	51	118	143.75		256	446	283	357	335.5	388	598	273	616	468.75						0.017152	0.0161239	0.0106526	0.0125973	0.0141315	0.0149223	0.00873319	0.010198	0.00819331	0.0105117		0.00037055	0.000565096	0.00059251	0.000465197	0.000498338	0.000437118	0.000471395	0.000627871	0.000657507	0.000548473
NM_001164791	435	140	263	177	102	170.5	127	220	76	103	131.5		519	881	285	517	550.5	498	624	166	588	469						0.0250134	0.0278986	0.0238673	0.0144374	0.0228042	0.0130699	0.00736131	0.015197	0.00715178	0.010695		0.000751232	0.00111626	0.000596697	0.000673688	0.000784468	0.000561043	0.000491891	0.000381782	0.00062762	0.000515584
NM_175935	327	78	146	65	115	101	184	316	40	104	161		167	432	171	419	297.25	239	725	89	829	470.5						0.013936	0.0154874	0.00876483	0.0162774	0.0136164	0.0189359	0.0105735	0.0079984	0.00722122	0.0111823		0.000241726	0.000547358	0.000358018	0.000545987	0.000423272	0.000269255	0.000571507	0.00020469	0.000884859	0.000482578
NM_028662	363	92	151	93	89	106.25	120	234	37	79	117.5		757	804	495	605	665.25	416	594	285	587	470.5						0.0164374	0.0160178	0.0125405	0.0125973	0.0143982	0.0123495	0.00782975	0.00739852	0.00548535	0.00826578		0.00109573	0.00101869	0.00103637	0.000788359	0.000984787	0.000468662	0.000468242	0.000655469	0.000626553	0.000554732
NM_031201	302	100	170	124	149	135.75	245	584	103	197	282.25		193	339	224	396	288	456	708	267	457	472						0.0178667	0.0180333	0.0167206	0.0210899	0.0184276	0.0252135	0.0195409	0.0205959	0.0136787	0.0197573		0.00027936	0.000429524	0.000468983	0.000516017	0.000423471	0.000513726	0.000558107	0.000614071	0.000487793	0.000543424
NM_028181	619	90	97	147	68	100.5	198	208	78	113	149.25		275	385	214	263	284.25	667	462	219	542	472.5						0.01608	0.0102896	0.019822	0.00962491	0.0139541	0.0203767	0.00695978	0.0155969	0.00784613	0.0126949		0.000398052	0.000487807	0.000448046	0.000342708	0.000419153	0.000751437	0.000364188	0.000503676	0.000578521	0.000549456
NM_029847	537	102	134	90	95	105.25	128	297	58	135	154.5		263	482	290	530	391.25	358	743	157	633	472.75						0.018224	0.0142145	0.0121359	0.0134466	0.0145053	0.0131728	0.00993776	0.0115977	0.0093737	0.0110205		0.000380682	0.000610709	0.000607166	0.000690628	0.000572296	0.00040332	0.000585697	0.000361083	0.000675653	0.000506438
NM_030557	591	86	184	111	89	117.5	147	232	74	101	138.5		287	844	319	686	534	377	662	151	703	473.25						0.0153654	0.0195184	0.0149676	0.0125973	0.0156122	0.0151281	0.00776283	0.014797	0.00701291	0.0111752		0.000415421	0.00106938	0.000667882	0.000893908	0.000761647	0.000424725	0.000521845	0.000347284	0.000750369	0.000511056
NM_018807	477	93	300	155	64	153	120	132	142	53	111.75		210	1691	159	941	750.25	190	886	154	664	473.5						0.016616	0.0318235	0.0209008	0.00905874	0.0195998	0.0123495	0.00441678	0.0283943	0.00368004	0.0122102		0.000303967	0.00214255	0.000332894	0.00122619	0.0010014	0.000214052	0.000698421	0.000354183	0.000708741	0.00049385
NM_025297	354	74	266	134	146	155	134	381	77	159	187.75		521	540	415	330	451.5	414	632	315	534	473.75						0.0132214	0.0282168	0.018069	0.0206653	0.0200431	0.0137903	0.0127484	0.0153969	0.0110401	0.0132439		0.000754127	0.000684197	0.000868875	0.000430014	0.000684303	0.000466409	0.000498197	0.000724466	0.000569982	0.000564763
NM_019814	76	148	353	166	291	239.5	341	998	161	385	471.25		279	322	315	411	331.75	520	426	453	502	475.25						0.0264427	0.0374456	0.022384	0.041189	0.0318653	0.0350931	0.0333936	0.0321936	0.0267324	0.0318532		0.000403842	0.000407984	0.000659508	0.000535563	0.000501724	0.000585828	0.00033581	0.00104185	0.000535826	0.000624829
NM_007778	533	5980	12316	4640	3645	6645.25	176	540	152	171	259.75		16738	22158	7829	12067	14698	368	794	292	448	475.5						1.06843	1.30646	0.625674	0.515924	0.879122	0.0181126	0.0180687	0.0303939	0.0118734	0.0196121		0.0242276	0.0280749	0.0163914	0.0157242	0.0211045	0.000414586	0.000625899	0.000671569	0.000478187	0.00054756
NM_027995	326	95	192	75	156	129.5	292	470	44	293	274.75		215	311	196	318	260	642	383	198	684	476.75						0.0169734	0.020367	0.0101133	0.0220807	0.0173836	0.0300504	0.0157264	0.00879824	0.0203444	0.0187299		0.000311204	0.000394047	0.00041036	0.000414377	0.000382497	0.000723272	0.000301914	0.000455379	0.000730089	0.000552663
NM_018875	147	95	378	159	205	209.25	225	788	121	319	363.25		240	399	328	425	348	500	553	318	537	477						0.0169734	0.0400976	0.0214401	0.0290163	0.0268818	0.0231553	0.0263669	0.0241952	0.0221497	0.0239668		0.000347391	0.000505546	0.000686725	0.000553806	0.000523367	0.000563296	0.000435922	0.000731366	0.000573184	0.000575942
NM_023248	231	496	1243	498	434	667.75	428	783	213	384	452		748	692	408	407	563.75	480	507	344	578	477.25						0.0886189	0.131855	0.0671521	0.0614296	0.087264	0.0440465	0.0261996	0.0425915	0.026663	0.0348751		0.0010827	0.000876786	0.000854219	0.000530351	0.000836014	0.000540764	0.000399661	0.000791163	0.000616947	0.000587134
NM_001113530	533	5980	12316	4640	3645	6645.25	176	540	152	171	259.75		16439	21953	7731	11925	14512	373	794	296	447	477.5						1.06843	1.30646	0.625674	0.515924	0.879122	0.0181126	0.0180687	0.0303939	0.0118734	0.0196121		0.0237948	0.0278152	0.0161862	0.0155391	0.0208338	0.000420219	0.000625899	0.000680768	0.00047712	0.000551001
NM_146165	261	56	200	106	182	136	189	659	116	315	319.75		202	378	349	435	341	362	611	291	650	478.5						0.0100054	0.0212157	0.0142934	0.0257608	0.0178188	0.0194504	0.0220505	0.0231954	0.021872	0.0216421		0.000292387	0.000478938	0.000730693	0.000566837	0.000517214	0.000407826	0.000481643	0.000669269	0.000693798	0.000563134
NM_015816	119	89	287	77	145	149.5	112	363	36	166	169.25		396	219	469	172	314	798	358	493	271	480						0.0159014	0.0304445	0.010383	0.0205237	0.0193131	0.0115262	0.0121462	0.00719856	0.0115262	0.0105993		0.000573194	0.00027748	0.000981934	0.000224128	0.000514184	0.00089902	0.000282206	0.00113385	0.00028926	0.000651083
NM_027218	157	106	104	235	148	148.25	339	347	127	193	251.5		473	103	771	168	378.75	916	164	557	283	480						0.0189387	0.0110321	0.0316882	0.0209483	0.0206519	0.0348873	0.0116108	0.0253949	0.0134009	0.0213235		0.000684649	0.000130504	0.00161422	0.000218916	0.000662073	0.00103196	0.000129279	0.00128104	0.000302069	0.000686086
NM_026095	107	206	754	246	501	426.75	539	1577	210	683	752.25		636	406	307	239	397	875	309	397	339	480						0.0368054	0.079983	0.0331715	0.070913	0.0552182	0.0554698	0.0527672	0.0419916	0.047424	0.0494131		0.000920585	0.000514415	0.000642758	0.000311434	0.000597298	0.000985768	0.00024358	0.000913057	0.000361842	0.000626062
NM_027481	624	110	174	135	165	146	253	467	116	211	261.75		472	352	332	243	349.75	670	506	294	456	481.5						0.0196534	0.0184576	0.0182039	0.0233546	0.0199174	0.0260368	0.015626	0.0231954	0.0146507	0.0198772		0.000683201	0.000445995	0.0006951	0.000316647	0.000535236	0.000754816	0.000398873	0.000676168	0.000486726	0.000579146
NM_010027	99	75	168	53	121	104.25	91	255	45	192	145.75		211	446	257	386	325	281	788	203	656	482						0.0134	0.0178212	0.00714671	0.0171267	0.0138736	0.00936503	0.00853242	0.0089982	0.0133315	0.0100568		0.000305414	0.000565096	0.000538075	0.000502986	0.000477893	0.000316572	0.000621169	0.000466878	0.000700202	0.000526206
NM_011309	75	73	176	136	123	127	257	443	85	171	239		393	146	533	169	310.25	667	546	457	260	482.5						0.0130427	0.0186698	0.0183387	0.0174098	0.0168652	0.0264485	0.014823	0.0169966	0.0118734	0.0175354		0.000568852	0.000184987	0.00111593	0.000220219	0.000522497	0.000751437	0.000430404	0.00105105	0.000277519	0.000627603
NM_016753	203	194	228	190	215	206.75	420	495	156	368	359.75		230	403	116	623	343	450	628	173	679	482.5						0.0346614	0.0241858	0.0256203	0.0304317	0.0287248	0.0432232	0.0165629	0.0311938	0.025552	0.029133		0.000332916	0.000510614	0.000242866	0.000811814	0.000474553	0.000506966	0.000495044	0.000397881	0.000724752	0.000531161
NM_019803	146	170	488	179	218	263.75	297	584	107	294	320.5		224	611	271	556	415.5	369	698	153	711	482.75						0.0303734	0.0517662	0.024137	0.0308563	0.0342832	0.030565	0.0195409	0.0213957	0.0204138	0.0229789		0.000324231	0.000774157	0.000567386	0.000724508	0.000597571	0.000415712	0.000550224	0.000351883	0.000758908	0.000519182
NM_130889	253	308	571	513	454	461.5	742	1186	472	631	757.75		197	526	92	372	296.75	549	405	189	797	485						0.0550295	0.0605707	0.0691748	0.0642604	0.0622588	0.076361	0.0396841	0.0943811	0.0438134	0.0635599		0.00028515	0.000666459	0.000192618	0.000484743	0.000407242	0.000618499	0.000319256	0.00043468	0.000850703	0.000555784
NM_019979	75	345	336	352	335	342	623	669	349	373	503.5		309	429	299	382	354.75	595	570	324	453	485.5						0.0616402	0.0356423	0.0474649	0.0474168	0.0480411	0.0641144	0.0223851	0.069786	0.0258992	0.0455462		0.000447265	0.000543557	0.000626009	0.000497774	0.000528651	0.000670322	0.000449323	0.000745165	0.000483524	0.000587084
NM_181593	659	133	240	82	61	129	52	120	18	36	56.5		1448	1650	611	903	1153	421	647	250	625	485.75						0.0237627	0.0254588	0.0110572	0.00863411	0.0172282	0.00535145	0.00401526	0.00359928	0.00249965	0.00386641		0.00209592	0.0020906	0.00127924	0.00117667	0.00166061	0.000474295	0.000510021	0.000574973	0.000667114	0.000556601
NM_011936	483	72	151	109	116	112	218	576	86	210	272.5		230	390	196	456	318	478	600	149	722	487.25						0.012864	0.0160178	0.014698	0.016419	0.0149997	0.0224349	0.0192732	0.0171966	0.0145813	0.0183715		0.000332916	0.000494143	0.00041036	0.000594201	0.000457905	0.000538511	0.000472972	0.000342684	0.00077065	0.000531204
NM_153141	566	74	123	109	112	104.5	157	311	66	119	163.25		65	492	62	535	288.5	271	835	86	758	487.5						0.0132214	0.0130476	0.014698	0.0158528	0.0142049	0.0161573	0.0104062	0.0131974	0.00826274	0.0120059		9.4085e-05	0.00062338	0.000129808	0.000697144	0.000386104	0.000305306	0.000658219	0.000197791	0.000809075	0.000492598
NM_144545	242	274	606	503	380	440.75	550	1390	305	583	707		370	505	130	503	377	631	676	179	467	488.25						0.0489548	0.0642834	0.0678263	0.0537863	0.0587127	0.0566018	0.0465101	0.0609878	0.0404805	0.051145		0.00053556	0.000639851	0.000272178	0.000655445	0.000525759	0.000710879	0.000532881	0.000411681	0.000498467	0.000538477
NM_001256055	242	274	606	503	380	440.75	550	1390	305	583	707		370	505	130	503	377	631	676	179	467	488.25						0.0489548	0.0642834	0.0678263	0.0537863	0.0587127	0.0566018	0.0465101	0.0609878	0.0404805	0.051145		0.00053556	0.000639851	0.000272178	0.000655445	0.000525759	0.000710879	0.000532881	0.000411681	0.000498467	0.000538477
NM_001085390	365	483	738	160	198	394.75	270	332	32	83	179.25		449	948	175	477	512.25	284	992	55	628	489.75						0.0862962	0.0782858	0.021575	0.0280255	0.0535456	0.0277864	0.0111089	0.00639872	0.00576309	0.0127643		0.00064991	0.00120115	0.000366393	0.000621566	0.000709754	0.000319952	0.00078198	0.000126494	0.000670316	0.000474685
NM_019489	282	73	200	106	147	131.5	136	458	61	174	207.25		288	487	234	312	330.25	308	757	220	676	490.25						0.0130427	0.0212157	0.0142934	0.0208068	0.0173396	0.0139961	0.0153249	0.0121976	0.0120817	0.0134001		0.000416869	0.000617045	0.00048992	0.000406559	0.000482598	0.00034699	0.000596733	0.000505976	0.00072155	0.000542812
NM_030245	316	56	229	77	78	110	71	187	29	97	96		416	707	336	510	492.25	424	615	263	660	490.5						0.0100054	0.0242919	0.010383	0.0110403	0.0139301	0.00730678	0.00625711	0.00579884	0.00673518	0.00652448		0.000602144	0.000895792	0.000703475	0.000664567	0.000716494	0.000477675	0.000484796	0.000604872	0.000704472	0.000567954
NM_009713	487	85	131	87	103	101.5	211	322	59	100	173		347	378	375	559	414.75	604	454	245	660	490.75						0.0151867	0.0138963	0.0117314	0.0145789	0.0138483	0.0217145	0.0107743	0.0117976	0.00694348	0.0128075		0.000502269	0.000478938	0.000785128	0.000728418	0.000623688	0.000680461	0.000357882	0.000563474	0.000704472	0.000576572
NM_181279	401	134	204	224	231	198.25	349	738	162	296	386.25		163	434	112	526	308.75	362	778	178	648	491.5						0.0239414	0.02164	0.030205	0.0326964	0.0271207	0.0359164	0.0246938	0.0323935	0.0205527	0.0283891		0.000235936	0.000549892	0.000234492	0.000685416	0.000426434	0.000407826	0.000613287	0.000409381	0.000691663	0.000530539
NM_026446	197	71	191	126	207	148.75	231	577	105	247	290		207	358	238	444	311.75	366	671	241	688	491.5						0.0126854	0.020261	0.0169903	0.0292994	0.019809	0.0237728	0.0193067	0.0209958	0.0171504	0.0203064		0.000299624	0.000453597	0.000498295	0.000578564	0.00045752	0.000412333	0.00052894	0.000554274	0.000734359	0.000557476
NM_021531	589	74	125	109	112	105	164	326	67	124	170.25		65	492	62	541	290	271	829	85	783	492						0.0132214	0.0132598	0.014698	0.0158528	0.014258	0.0168776	0.0109081	0.0133973	0.00860992	0.0124482		9.4085e-05	0.00062338	0.000129808	0.000704962	0.000388059	0.000305306	0.000653489	0.000195491	0.00083576	0.000497512
NM_028076	300	112	136	78	101	106.75	195	335	72	152	188.5		385	486	247	407	381.25	445	663	202	661	492.75						0.0200107	0.0144266	0.0105178	0.0142958	0.0148127	0.0200679	0.0112093	0.0143971	0.0105541	0.0140571		0.000557272	0.000615778	0.000517138	0.000530351	0.000555135	0.000501333	0.000522634	0.000464578	0.000705539	0.000548521
NM_001190310	190	107	106	237	152	150.5	344	355	128	199	256.5		478	110	780	173	385.25	924	177	566	304	492.75						0.0191174	0.0112443	0.0319579	0.0215145	0.0209585	0.0354019	0.0118785	0.0255949	0.0138175	0.0216732		0.000691886	0.000139374	0.00163307	0.000225432	0.00067244	0.00104097	0.000139527	0.00130174	0.000324484	0.00070168
NM_011420	269	123	238	135	171	166.75	239	505	107	249	275		225	348	185	401	289.75	406	692	258	616	493						0.0219761	0.0252466	0.0182039	0.0242038	0.0224076	0.0245961	0.0168975	0.0213957	0.0172893	0.0200446		0.000325679	0.000440927	0.00038733	0.000522532	0.000419117	0.000457396	0.000545494	0.000593372	0.000657507	0.000563442
NM_026355	283	93	162	134	102	122.75	180	286	78	136	170		256	667	171	604	424.5	411	869	202	490	493						0.016616	0.0171847	0.018069	0.0144374	0.0165768	0.0185242	0.0095697	0.0155969	0.00944313	0.0132835		0.00037055	0.00084511	0.000358018	0.000787056	0.000590184	0.000463029	0.000685021	0.000464578	0.000523017	0.000533911
NM_018860	6	38	256	88	140	130.5	153	674	124	334	321.25		277	316	235	167	248.75	411	794	276	493	493.5						0.00678935	0.027156	0.0118662	0.019816	0.0164069	0.0157456	0.0225524	0.024795	0.0231912	0.0215711		0.000400947	0.000400382	0.000492014	0.000217613	0.000377739	0.000463029	0.000625899	0.00063477	0.000526219	0.000562479
NM_028127	603	131	223	157	106	154.25	63	168	35	118	96		1485	2033	1071	1461	1512.5	233	695	166	882	494						0.0234054	0.0236555	0.0211704	0.0150035	0.0208087	0.00648348	0.00562136	0.0069986	0.00819331	0.00682419		0.00214948	0.00257588	0.00224233	0.00190379	0.00221787	0.000262496	0.000547859	0.000381782	0.000941431	0.000533392
NM_001159393	285	1358	4225	883	1282	1937	177	645	133	331	321.5		3498	4859	2068	3007	3358	266	785	244	681	494						0.24263	0.448181	0.119067	0.181458	0.247834	0.0182155	0.021582	0.0265947	0.0229829	0.0223438		0.00506322	0.00615651	0.00432972	0.00391834	0.00486695	0.000299673	0.000618805	0.000561174	0.000726887	0.000551635
NM_026141	473	279	508	382	194	340.75	380	476	184	222	315.5		491	813	202	528	508.5	438	685	120	739	495.5						0.0498481	0.0538878	0.0515102	0.0274593	0.0456764	0.0391067	0.0159272	0.0367926	0.0154145	0.0268103		0.000710703	0.0010301	0.000422922	0.000688022	0.000712936	0.000493447	0.000539976	0.000275987	0.000788795	0.000524551
NM_001033275	353	81	160	122	59	105.5	110	112	91	45	89.5		239	527	81	461	327	445	661	111	766	495.75						0.014472	0.0169725	0.0164509	0.00835103	0.0140616	0.0113204	0.00374757	0.0181964	0.00312457	0.00909722		0.000345943	0.000667726	0.000169588	0.000600716	0.000445993	0.000501333	0.000521057	0.000255288	0.000817614	0.000523823
NM_001164077	233	493	938	423	345	549.75	198	565	160	229	288		652	1884	433	918	971.75	176	985	148	678	496.75						0.0880829	0.0995014	0.0570388	0.0488323	0.0733639	0.0203767	0.0189052	0.0319936	0.0159006	0.021794		0.000943744	0.00238709	0.000906561	0.00119622	0.0013584	0.00019828	0.000776462	0.000340384	0.000723685	0.000509703
NM_001164076	233	493	938	423	345	549.75	198	565	160	229	288		652	1884	433	918	971.75	176	985	148	678	496.75						0.0880829	0.0995014	0.0570388	0.0488323	0.0733639	0.0203767	0.0189052	0.0319936	0.0159006	0.021794		0.000943744	0.00238709	0.000906561	0.00119622	0.0013584	0.00019828	0.000776462	0.000340384	0.000723685	0.000509703
NM_001164074	233	493	938	423	345	549.75	198	565	160	229	288		652	1884	433	918	971.75	176	985	148	678	496.75						0.0880829	0.0995014	0.0570388	0.0488323	0.0733639	0.0203767	0.0189052	0.0319936	0.0159006	0.021794		0.000943744	0.00238709	0.000906561	0.00119622	0.0013584	0.00019828	0.000776462	0.000340384	0.000723685	0.000509703
NM_173048	699	72	131	96	127	106.5	188	416	73	189	216.5		224	459	169	386	309.5	301	767	139	784	497.75						0.012864	0.0138963	0.012945	0.0179759	0.0144203	0.0193475	0.0139196	0.0145971	0.0131232	0.0152468		0.000324231	0.000581568	0.000353831	0.000502986	0.000440654	0.000339104	0.000604615	0.000319685	0.000836827	0.000525058
NM_001039710	223	264	511	144	247	291.5	154	582	106	223	266.25		735	1087	353	839	753.5	363	925	226	477	497.75						0.0471681	0.054206	0.0194175	0.0349611	0.0389382	0.0158485	0.019474	0.0211958	0.015484	0.0180006		0.00106388	0.00137726	0.000739067	0.00109328	0.00106837	0.000408953	0.000729165	0.000519776	0.000509141	0.000541759
NM_011293	98	49	191	50	133	105.75	115	286	27	180	152		287	336	342	309	318.5	541	709	344	400	498.5						0.00875469	0.020261	0.00674218	0.0188252	0.0136458	0.0118349	0.0095697	0.00539892	0.0124983	0.00982545		0.000415421	0.000425723	0.000716037	0.000402649	0.000489958	0.000609486	0.000558895	0.000791163	0.000426953	0.000596624
NM_026159	590	114	187	87	123	127.75	221	523	87	229	265		261	551	237	561	402.5	420	675	246	660	500.25						0.0203681	0.0198366	0.0117314	0.0174098	0.0173365	0.0227436	0.0174998	0.0173965	0.0159006	0.0183851		0.000377787	0.000698135	0.000496201	0.000731024	0.000575787	0.000473169	0.000532093	0.000565773	0.000704472	0.000568877
NM_009085	327	114	336	146	171	191.75	183	412	90	150	208.75		513	579	515	447	513.5	511	622	331	538	500.5						0.0203681	0.0356423	0.0196872	0.0242038	0.0249753	0.018833	0.0137857	0.0179964	0.0104152	0.0152576		0.000742547	0.000733612	0.00107824	0.000582473	0.000784219	0.000575688	0.000490314	0.000761264	0.000574251	0.000600379
NM_001039392	25	421	748	576	627	593	879	1616	523	1266	1071		395	243	382	131	287.75	680	543	488	296	501.75						0.0752189	0.0793466	0.0776699	0.0887473	0.0802457	0.09046	0.0540721	0.104579	0.0879045	0.0842539		0.000571747	0.000307889	0.000799784	0.000170702	0.000462531	0.000766082	0.000428039	0.00112235	0.000315945	0.000658104
NM_001190327	25	421	748	576	627	593	879	1616	523	1266	1071		395	243	382	131	287.75	680	543	488	296	501.75						0.0752189	0.0793466	0.0776699	0.0887473	0.0802457	0.09046	0.0540721	0.104579	0.0879045	0.0842539		0.000571747	0.000307889	0.000799784	0.000170702	0.000462531	0.000766082	0.000428039	0.00112235	0.000315945	0.000658104
NM_025284	25	421	748	576	627	593	879	1616	523	1266	1071		395	243	382	131	287.75	680	543	488	296	501.75						0.0752189	0.0793466	0.0776699	0.0887473	0.0802457	0.09046	0.0540721	0.104579	0.0879045	0.0842539		0.000571747	0.000307889	0.000799784	0.000170702	0.000462531	0.000766082	0.000428039	0.00112235	0.000315945	0.000658104
NM_017373	443	420	767	272	183	410.5	150	182	92	36	115		2629	3785	845	1087	2086.5	767	579	352	309	501.75						0.0750402	0.081362	0.0366775	0.0259023	0.0547455	0.0154369	0.00608981	0.0183963	0.00249965	0.0106057		0.00380537	0.00479572	0.00176916	0.00141644	0.00294667	0.000864096	0.000456418	0.000809562	0.000329821	0.000614974
NM_011794	289	66	126	80	138	102.5	205	451	80	201	234.25		228	336	263	356	295.75	443	688	197	680	502						0.011792	0.0133659	0.0107875	0.0195329	0.0138696	0.021097	0.0150907	0.0159968	0.0139564	0.0165352		0.000330021	0.000425723	0.000550637	0.000463894	0.000442569	0.00049908	0.000542341	0.000453079	0.00072582	0.00055508
NM_145609	326	80	197	152	119	137	206	403	107	172	222		255	334	252	260	275.25	603	592	214	610	504.75						0.0142934	0.0208974	0.0204962	0.0168436	0.0181327	0.0212	0.0134846	0.0213957	0.0119428	0.0170058		0.000369103	0.000423189	0.000527606	0.000338799	0.000414674	0.000679335	0.000466665	0.000492177	0.000651103	0.00057232
NM_025605	142	86	240	93	183	150.5	101	333	50	185	167.25		219	492	420	377	377	602	673	263	481	504.75						0.0153654	0.0254588	0.0125405	0.0259023	0.0198167	0.0103942	0.0111423	0.009998	0.0128454	0.011095		0.000316994	0.00062338	0.000879344	0.000491258	0.000577744	0.000678208	0.000530517	0.000604872	0.000513411	0.000581752
NM_019965	357	236	446	174	186	260.5	321	469	183	192	291.25		262	611	173	337	345.75	355	788	95	788	506.5						0.0421654	0.0473109	0.0234628	0.026327	0.0348165	0.0330349	0.015693	0.0365927	0.0133315	0.024663		0.000379235	0.000774157	0.000362206	0.000439135	0.000488683	0.00039994	0.000621169	0.00021849	0.000841097	0.000520174
NM_153138	474	99	346	172	310	231.75	386	926	137	505	488.5		237	561	175	674	411.75	441	658	134	794	506.75						0.017688	0.0367031	0.0231931	0.0438783	0.0303656	0.0397242	0.0309844	0.0273945	0.0350646	0.0332919		0.000343048	0.000710805	0.000366393	0.000878271	0.000574629	0.000496827	0.000518692	0.000308186	0.000847501	0.000542801
NM_001082536	910	138	220	110	139	151.75	214	385	93	194	221.5		311	401	172	621	376.25	427	690	120	791	507						0.0246561	0.0233372	0.0148328	0.0196745	0.0206251	0.0220233	0.0128823	0.0185963	0.0134704	0.016743		0.00045016	0.00050808	0.000360112	0.000809208	0.00053189	0.000481055	0.000543917	0.000275987	0.000844299	0.000536315
NM_001159525	188	96	147	87	105	108.75	186	418	85	191	220		278	341	253	463	333.75	470	714	298	547	507.25						0.017152	0.0155935	0.0117314	0.014862	0.0148347	0.0191417	0.0139865	0.0169966	0.013262	0.0158467		0.000402394	0.000432058	0.0005297	0.000603323	0.000491869	0.000529498	0.000562836	0.000685368	0.000583858	0.00059039
NM_144918	397	61	150	96	128	108.75	130	412	82	200	206		157	394	183	452	296.5	275	852	174	732	508.25						0.0108987	0.0159117	0.012945	0.0181175	0.0144682	0.0133786	0.0137857	0.0163967	0.013887	0.014362		0.000227251	0.000499211	0.000383143	0.000588989	0.000424648	0.000309813	0.00067162	0.000400181	0.000781323	0.000540734
NM_016877	556	155	323	148	158	196	170	296	65	182	178.25		409	1019	245	811	621	335	819	116	763	508.25						0.0276934	0.0342633	0.0199569	0.0223638	0.0260693	0.0174951	0.0099043	0.0129974	0.0126371	0.0132585		0.000592011	0.00129111	0.00051295	0.00105679	0.000863215	0.000377408	0.000645606	0.000266787	0.000814412	0.000526054
NM_013535	107	75	493	65	159	198	176	657	47	227	276.75		605	144	411	167	331.75	1057	247	477	258	509.75						0.0134	0.0522966	0.00876483	0.0225053	0.0242417	0.0181126	0.0219835	0.00939812	0.0157617	0.016314		0.000875714	0.000182453	0.000860501	0.000217613	0.00053407	0.00119081	0.000194707	0.00109705	0.000275384	0.000689487
NM_026441	256	126	345	111	165	186.75	295	761	89	258	350.75		315	408	342	539	401	630	639	219	552	510						0.0225121	0.036597	0.0149676	0.0233546	0.0243578	0.0303592	0.0254634	0.0177964	0.0179142	0.0228833		0.00045595	0.000516949	0.000716037	0.000702356	0.000597823	0.000709753	0.000503715	0.000503676	0.000589195	0.000576585
NM_001146176	132	52	185	102	119	114.5	150	477	79	228	233.5		192	481	192	513	344.5	377	796	136	732	510.25						0.00929069	0.0196245	0.013754	0.0168436	0.0148782	0.0154369	0.0159607	0.0157968	0.0158311	0.0157564		0.000277912	0.000609442	0.000401986	0.000668476	0.000489454	0.000424725	0.000627476	0.000312785	0.000781323	0.000536577
NM_001164411	553	156	327	149	164	199	171	297	65	185	179.5		409	1022	245	853	632.25	336	822	118	766	510.5						0.0278721	0.0346876	0.0200917	0.023213	0.0264661	0.017598	0.00993776	0.0129974	0.0128454	0.0133447		0.000592011	0.00129491	0.00051295	0.00111152	0.000877847	0.000378535	0.000647971	0.000271387	0.000817614	0.000528877
NM_001136471	570	92	266	130	83	142.75	135	360	88	127	177.5		583	493	468	415	489.75	673	418	368	600	514.75						0.0164374	0.0282168	0.0175297	0.0117481	0.018483	0.0138932	0.0120458	0.0175965	0.00881822	0.0130884		0.00084387	0.000624647	0.00097984	0.000540775	0.000747283	0.000758196	0.000329504	0.00084636	0.000640429	0.000643622
NM_023202	94	123	761	152	341	344.25	254	1226	91	475	511.5		180	399	266	265	277.5	345	941	266	514	516.5						0.0219761	0.0807256	0.0204962	0.0482661	0.042866	0.0261398	0.0410226	0.0181964	0.0329815	0.029585		0.000260543	0.000505546	0.000556918	0.000345314	0.00041708	0.000388674	0.000741777	0.000611771	0.000548634	0.000572714
NM_028769	593	296	502	228	348	343.5	444	873	231	379	481.75		340	666	229	607	460.5	497	680	186	703	516.5						0.0528855	0.0532513	0.0307443	0.0492569	0.0465345	0.0456931	0.029211	0.0461908	0.0263158	0.0368527		0.000492137	0.000843843	0.000479452	0.000790965	0.000651599	0.000559916	0.000536035	0.00042778	0.000750369	0.000568525
NM_001164709	593	296	502	228	348	343.5	444	873	231	379	481.75		340	666	229	607	460.5	497	680	186	703	516.5						0.0528855	0.0532513	0.0307443	0.0492569	0.0465345	0.0456931	0.029211	0.0461908	0.0263158	0.0368527		0.000492137	0.000843843	0.000479452	0.000790965	0.000651599	0.000559916	0.000536035	0.00042778	0.000750369	0.000568525
NM_023211	39	326	1180	343	514	590.75	598	1834	221	818	867.75		192	490	312	418	353	408	914	307	444	518.25						0.0582455	0.125172	0.0462513	0.072753	0.0756056	0.0615416	0.0613665	0.0441912	0.0567977	0.0559742		0.000277912	0.000620846	0.000653227	0.000544684	0.000524167	0.000459649	0.000720493	0.000706067	0.000473917	0.000590032
NM_008425	409	607	550	409	237	450.75	163	981	59	331	383.5		1194	770	308	838	777.5	198	1049	63	766	519						0.108451	0.0583431	0.055151	0.0335456	0.0638727	0.0167747	0.0328247	0.0117976	0.0229829	0.021095		0.00172827	0.000975615	0.000644852	0.00109197	0.00111018	0.000223065	0.000826912	0.000144893	0.000817614	0.000503121
NM_001042611	1067	62	30	127	198	104.25	70	146	343	148	176.75		331	135	351	1170	496.75	236	347	847	649	519.75						0.0110774	0.00318235	0.0171251	0.0280255	0.0148526	0.00720387	0.00488523	0.0685863	0.0102764	0.0227379		0.00047911	0.000171049	0.00073488	0.00152459	0.000727408	0.000265876	0.000273535	0.00194801	0.000692731	0.000795038
NM_025523	57	50	267	52	149	129.5	158	581	45	293	269.25		230	395	242	363	307.5	397	866	319	500	520.5						0.00893336	0.0283229	0.00701187	0.0210899	0.0163395	0.0162602	0.0194405	0.0089982	0.0203444	0.0162608		0.000332916	0.000500478	0.000506669	0.000473015	0.00045327	0.000447257	0.000682656	0.000733666	0.000533691	0.000599317
NM_016666	311	172	305	243	253	243.25	517	865	200	347	482.25		232	429	232	318	302.75	496	617	328	644	521.25						0.0307307	0.0323539	0.032767	0.0358103	0.0329155	0.0532057	0.0289433	0.039992	0.0240939	0.0365587		0.000335811	0.000543557	0.000485733	0.000414377	0.000444869	0.000558789	0.000486373	0.000754365	0.000687394	0.00062173
NM_001025606	303	222	336	260	306	281	296	701	116	279	348		726	610	498	629	615.75	521	716	262	587	521.5						0.0396641	0.0356423	0.0350593	0.0433121	0.0384195	0.0304621	0.0234558	0.0231954	0.0193723	0.0241214		0.00105086	0.00077289	0.00104265	0.000819633	0.000921507	0.000586954	0.000564413	0.000602572	0.000626553	0.000595123
NM_007714	462	53	214	91	78	109	63	114	45	42	66		1104	1612	625	970	1077.75	528	838	205	515	521.5						0.00946936	0.0227008	0.0122708	0.0110403	0.0138703	0.00648348	0.0038145	0.0089982	0.00291626	0.00555311		0.001598	0.00204246	0.00130855	0.00126398	0.00155324	0.00059484	0.000660584	0.000471478	0.000549702	0.000569151
NM_008654	638	1197	904	605	236	735.5	63	106	116	37	80.5		12432	10155	5940	5358	8471.25	409	722	446	510	521.75						0.213865	0.0958948	0.0815804	0.0334041	0.106186	0.00648348	0.00354681	0.0231954	0.00256909	0.00894869		0.0179948	0.0128667	0.0124364	0.00698186	0.01257	0.000460776	0.000569143	0.00102575	0.000544365	0.000650009
NM_053158	317	72	147	105	105	107.25	223	490	94	141	237		160	555	161	502	344.5	303	1051	144	590	522						0.012864	0.0155935	0.0141586	0.014862	0.0143695	0.0229495	0.0163956	0.0187962	0.00979031	0.0169829		0.000231594	0.000703203	0.000337082	0.000654142	0.000481505	0.000341357	0.000828489	0.000331184	0.000629755	0.000532696
NM_025380	155	73	287	122	245	181.75	115	614	100	329	289.5		149	574	389	560	418	214	1010	264	601	522.25						0.0130427	0.0304445	0.0164509	0.034678	0.023654	0.0118349	0.0205447	0.019996	0.022844	0.0188049		0.000215672	0.000727276	0.00081444	0.000729721	0.000621777	0.000241091	0.000796169	0.000607172	0.000641496	0.000571482
NM_001037757	456	71	211	79	114	118.75	114	372	102	159	186.75		255	404	385	382	356.5	511	624	305	652	523						0.0126854	0.0223825	0.0106526	0.0161359	0.0154641	0.011732	0.0124473	0.0203959	0.0110401	0.0139038		0.000369103	0.000511881	0.000806065	0.000497774	0.000546206	0.000575688	0.000491891	0.000701467	0.000695933	0.000616245
NM_026833	456	71	211	79	114	118.75	114	372	102	159	186.75		255	404	385	382	356.5	511	624	305	652	523						0.0126854	0.0223825	0.0106526	0.0161359	0.0154641	0.011732	0.0124473	0.0203959	0.0110401	0.0139038		0.000369103	0.000511881	0.000806065	0.000497774	0.000546206	0.000575688	0.000491891	0.000701467	0.000695933	0.000616245
NM_026391	434	87	198	103	72	115	159	184	89	78	127.5		306	723	190	512	432.75	304	769	306	716	523.75						0.015544	0.0210035	0.0138889	0.0101911	0.0151569	0.0163631	0.00615673	0.0177964	0.00541591	0.011433		0.000442923	0.000916064	0.000397798	0.000667173	0.00060599	0.000342484	0.000606192	0.000703767	0.000764245	0.000604172
NM_007506	117	99	290	73	392	213.5	251	1212	82	576	530.25		216	312	435	427	347.5	663	570	388	476	524.25						0.017688	0.0307627	0.00984358	0.0554848	0.0284448	0.025831	0.0405541	0.0163967	0.0399944	0.0306941		0.000312652	0.000395314	0.000910749	0.000556412	0.000543782	0.00074693	0.000449323	0.000892358	0.000508074	0.000649171
NM_001161419	117	99	290	73	392	213.5	251	1212	82	576	530.25		216	312	435	427	347.5	663	570	388	476	524.25						0.017688	0.0307627	0.00984358	0.0554848	0.0284448	0.025831	0.0405541	0.0163967	0.0399944	0.0306941		0.000312652	0.000395314	0.000910749	0.000556412	0.000543782	0.00074693	0.000449323	0.000892358	0.000508074	0.000649171
NM_015807	181	51	207	71	126	113.75	149	366	47	159	180.25		261	328	360	204	288.25	497	817	308	477	524.75						0.00911202	0.0219582	0.00957389	0.0178344	0.0146196	0.015334	0.0122465	0.00939812	0.0110401	0.0120047		0.000377787	0.000415587	0.000753723	0.000265827	0.000453231	0.000559916	0.00064403	0.000708367	0.000509141	0.000605363
NM_153592	321	200	320	269	237	256.5	409	772	179	289	412.25		341	366	268	613	397	405	764	268	662	524.75						0.0357334	0.0339451	0.0362729	0.0335456	0.0348743	0.0420912	0.0258315	0.0357928	0.0200667	0.0309455		0.000493584	0.000463734	0.000561105	0.000798783	0.000579302	0.00045627	0.000602251	0.000616371	0.000706607	0.000595374
NM_153287	564	1352	1750	736	498	1084	89	156	47	47	84.75		10341	9367	3992	5575	7318.75	508	666	262	665	525.25						0.241558	0.185637	0.0992449	0.0704883	0.149232	0.00915921	0.00521984	0.00939812	0.00326344	0.00676015		0.0149682	0.0118683	0.00835795	0.00726463	0.0106148	0.000572309	0.000524999	0.000602572	0.000709809	0.000602422
NM_028784	713	44	35	106	235	105	159	148	93	352	188		205	152	195	1064	404	326	267	234	1275	525.5						0.00786135	0.00371274	0.0142934	0.0332626	0.0147825	0.0163631	0.00495215	0.0185963	0.024441	0.0160881		0.000296729	0.000192589	0.000408267	0.00138647	0.000571014	0.000367269	0.000210472	0.000538175	0.00136091	0.000619207
NM_001166391	713	44	35	106	235	105	159	148	93	352	188		205	152	195	1064	404	326	267	234	1275	525.5						0.00786135	0.00371274	0.0142934	0.0332626	0.0147825	0.0163631	0.00495215	0.0185963	0.024441	0.0160881		0.000296729	0.000192589	0.000408267	0.00138647	0.000571014	0.000367269	0.000210472	0.000538175	0.00136091	0.000619207
NM_001081193	899	123	271	116	93	150.75	145	232	68	79	131		785	1156	421	870	808	501	707	170	724	525.5						0.0219761	0.0287472	0.0156419	0.0131635	0.0198822	0.0149223	0.00776283	0.0135973	0.00548535	0.0104419		0.00113626	0.00146469	0.000881437	0.00113367	0.00115401	0.000564422	0.000557318	0.000390982	0.000772784	0.000571377
NM_173386	488	99	210	83	86	119.5	102	164	41	98	101.25		884	1190	299	769	785.5	451	832	110	710	525.75						0.017688	0.0222764	0.011192	0.0121727	0.0158323	0.0104971	0.00548752	0.00819836	0.00680461	0.00774689		0.00127956	0.00150777	0.000626009	0.00100206	0.00110385	0.000508093	0.000655854	0.000252988	0.000757841	0.000543694
NM_009821	368	96	349	112	150	176.75	105	238	34	112	122.25		272	1070	109	727	544.5	281	844	94	885	526						0.017152	0.0370213	0.0151025	0.0212314	0.0226268	0.0108058	0.00796359	0.00679864	0.0077767	0.00833618		0.000393709	0.00135572	0.000228211	0.000947334	0.000731244	0.000316572	0.000665313	0.00021619	0.000944633	0.000535677
NM_001081108	80	62	201	50	138	112.75	127	432	42	221	205.5		271	269	546	146	308	668	561	398	479	526.5						0.0110774	0.0213217	0.00674218	0.0195329	0.0146685	0.0130699	0.0144549	0.00839832	0.0153451	0.0128171		0.000392262	0.000340832	0.00114315	0.000190249	0.000516622	0.000752563	0.000442228	0.000915357	0.000511276	0.000655356
NM_008670	1384	225	173	218	268	221	740	662	244	345	497.75		289	340	241	596	366.5	611	752	235	511	527.25						0.0402001	0.0183515	0.0293959	0.0379335	0.0314703	0.0761552	0.0221508	0.0487902	0.023955	0.0427628		0.000418316	0.000430791	0.000504576	0.000776631	0.000532579	0.000688348	0.000592791	0.000540475	0.000545432	0.000591761
NM_153049	945	147	236	114	151	162	224	400	96	198	229.5		328	413	182	647	392.5	438	722	125	828	528.25						0.0262641	0.0250345	0.0153722	0.021373	0.0220109	0.0230524	0.0133842	0.0191962	0.0137481	0.0173452		0.000474767	0.000523284	0.000381049	0.000843088	0.000555547	0.000493447	0.000569143	0.000287487	0.000883792	0.000558467
NM_009378	558	64	259	48	55	106.5	115	265	19	63	115.5		471	777	154	329	432.75	672	779	97	565	528.25						0.0114347	0.0274743	0.00647249	0.00778485	0.0132916	0.0118349	0.00886703	0.00379924	0.00437439	0.0072189		0.000681754	0.000984484	0.000322426	0.000428711	0.000604344	0.00075707	0.000614075	0.00022309	0.000603071	0.000549326
NM_001167914	272	177	508	218	228	282.75	230	488	94	215	256.75		445	1172	252	744	653.25	365	923	144	681	528.25						0.0316241	0.0538878	0.0293959	0.0322718	0.0367949	0.0236699	0.0163287	0.0187962	0.0149285	0.0184308		0.00064412	0.00148496	0.000527606	0.000969486	0.000906543	0.000411206	0.000727588	0.000331184	0.000726887	0.000549216
NM_007752	1042	60	30	127	198	103.75	70	148	343	148	177.25		345	137	353	1203	509.5	231	357	873	655	529						0.01072	0.00318235	0.0171251	0.0280255	0.0147632	0.00720387	0.00495215	0.0685863	0.0102764	0.0227547		0.000499374	0.000173583	0.000739067	0.0015676	0.000744905	0.000260243	0.000281418	0.00200781	0.000699135	0.00081215
NM_017466	341	1140	1184	830	466	905	197	327	414	107	261.25		5320	4511	2998	3148	3994.25	337	582	765	433	529.25						0.203681	0.125597	0.11192	0.065959	0.126789	0.0202737	0.0109416	0.0827834	0.00742952	0.0303571		0.00770049	0.00571558	0.00627684	0.00410207	0.00594875	0.000379661	0.000458782	0.00175942	0.000462176	0.000765009
NM_145505	745	100	131	94	149	118.5	245	455	81	179	240		284	569	124	659	409	438	834	80	767	529.75						0.0178667	0.0138963	0.0126753	0.0210899	0.016382	0.0252135	0.0152245	0.0161968	0.0124288	0.0172659		0.000411079	0.000720941	0.000259616	0.000858725	0.00056259	0.000493447	0.000657431	0.000183991	0.000818682	0.000538388
NM_026519	164	188	311	234	239	243	439	883	209	284	453.75		261	512	194	517	371	427	815	207	671	530						0.0335894	0.0329903	0.0315534	0.0338287	0.0329905	0.0451786	0.0295456	0.0417916	0.0197195	0.0340588		0.000377787	0.00064872	0.000406173	0.000673688	0.000526592	0.000481055	0.000642453	0.000476078	0.000716213	0.00057895
NM_009281	618	114	234	148	135	157.75	179	366	101	177	205.75		406	590	335	513	461	567	603	353	598	530.25						0.0203681	0.0248223	0.0199569	0.0191083	0.0210639	0.0184213	0.0122465	0.020196	0.01229	0.0157884		0.000587669	0.000747549	0.000701381	0.000668476	0.000676269	0.000638778	0.000475336	0.000811862	0.000638294	0.000641068
NM_001253820	248	86	138	131	73	107	165	203	104	90	140.5		137	670	167	555	382.25	358	934	99	736	531.75						0.0153654	0.0146388	0.0176645	0.0103326	0.0145003	0.0169805	0.00679248	0.0207958	0.00624913	0.0127045		0.000198302	0.000848911	0.000349644	0.000723205	0.000530016	0.00040332	0.000736259	0.000227689	0.000785593	0.000538215
NM_025802	411	122	199	118	167	151.5	302	547	100	213	290.5		224	510	198	517	362.25	459	723	169	777	532						0.0217974	0.0211096	0.0159115	0.0236377	0.020614	0.0310796	0.0183029	0.019996	0.0147896	0.021042		0.000324231	0.000646186	0.000414548	0.000673688	0.000514663	0.000517106	0.000569931	0.000388682	0.000829356	0.000576268
NM_001081229	750	56	215	89	75	108.75	95	148	54	78	93.75		786	1891	318	1130	1031.25	485	798	136	712	532.75						0.0100054	0.0228068	0.0120011	0.0106157	0.0138572	0.00977668	0.00495215	0.0107978	0.00541591	0.00773565		0.0011377	0.00239596	0.000665789	0.00147247	0.00141798	0.000546397	0.000629052	0.000312785	0.000759976	0.000562053
NM_023598	1169	269	374	233	231	276.75	139	251	102	194	171.5		1378	1448	372	1478	1169	507	702	147	775	532.75						0.0480615	0.0396733	0.0314186	0.0326964	0.0379624	0.0143048	0.00839858	0.0203959	0.0134704	0.0141424		0.0019946	0.00183466	0.000778847	0.00192594	0.00163351	0.000571182	0.000553377	0.000338084	0.000827221	0.000572466
NM_001111022	382	101	358	116	154	182.25	105	242	34	118	124.75		279	1108	116	750	563.25	292	856	94	890	533						0.0180454	0.037976	0.0156419	0.0217976	0.0233652	0.0108058	0.00809744	0.00679864	0.00819331	0.0084738		0.000403842	0.00140387	0.000242866	0.000977304	0.000756971	0.000328965	0.000674773	0.00021619	0.00094997	0.000542474
NM_025773	132	49	195	58	103	101.25	107	295	68	154	156		187	870	178	463	424.5	364	1149	133	487	533.25						0.00875469	0.0206853	0.00782093	0.0145789	0.0129599	0.0110116	0.00987084	0.0135973	0.010693	0.0112932		0.000270675	0.00110232	0.000372674	0.000603323	0.000587247	0.000410079	0.000905741	0.000305886	0.000519815	0.00053538
NM_001163769	220	289	764	291	387	432.75	537	1269	291	474	642.75		490	343	425	259	379.25	917	495	420	302	533.5						0.0516348	0.0810438	0.0392395	0.0547771	0.0566738	0.055264	0.0424614	0.0581884	0.0329121	0.0472064		0.000709256	0.000434592	0.000889812	0.000337496	0.000592789	0.00103308	0.000390202	0.000965955	0.000322349	0.000677898
NM_031168	192	912	253	591	266	505.5	57	150	1131	68	351.5		2073	314	886	1017	1072.5	89	134	1838	78	534.75						0.162944	0.0268378	0.0796926	0.0376504	0.0767813	0.00586601	0.00501907	0.226155	0.00472157	0.0604404		0.00300059	0.000397848	0.001855	0.00132522	0.00164466	0.000100267	0.00010563	0.0042272	8.32558e-05	0.00112909
NM_031251	348	87	143	88	87	101.25	202	299	60	161	180.5		371	495	338	487	422.75	461	714	274	692	535.25						0.015544	0.0151692	0.0118662	0.0123142	0.0137234	0.0207883	0.0100047	0.0119976	0.011179	0.0134924		0.000537008	0.000627181	0.000707662	0.000634596	0.000626612	0.000519359	0.000562836	0.00063017	0.000738628	0.000612748
NM_001252083	535	215	658	244	226	335.75	215	359	120	149	210.75		476	1189	279	776	680	369	889	148	737	535.75						0.0384134	0.0697995	0.0329018	0.0319887	0.0432759	0.0221262	0.0120123	0.0239952	0.0103458	0.0171199		0.000688991	0.0015065	0.000584135	0.00101118	0.000947703	0.000415712	0.000700786	0.000340384	0.00078666	0.000560886
NM_019467	128	118	253	215	253	209.75	326	684	119	458	396.75		152	259	275	324	252.5	340	905	222	679	536.5						0.0210827	0.0268378	0.0289914	0.0358103	0.0281806	0.0335494	0.022887	0.0237952	0.0318011	0.0280082		0.000220014	0.000328161	0.000575761	0.000422195	0.000386533	0.000383041	0.000713399	0.000510576	0.000724752	0.000582942
NM_173440	1142	99	226	109	108	135.5	113	190	83	94	120		804	2201	297	1569	1217.75	421	785	108	832	536.5						0.017688	0.0239737	0.014698	0.0152866	0.0179116	0.0116291	0.00635749	0.0165967	0.00652687	0.0102775		0.00116376	0.00278874	0.000621822	0.00204452	0.00165471	0.000474295	0.000618805	0.000248388	0.000888062	0.000557387
NM_019816	507	65	146	77	133	105.25	150	434	66	156	201.5		276	389	271	345	320.25	405	787	311	644	536.75						0.0116134	0.0154874	0.010383	0.0188252	0.0140772	0.0154369	0.0145218	0.0131974	0.0108318	0.013497		0.000399499	0.000492875	0.000567386	0.00044956	0.00047733	0.00045627	0.000620381	0.000715266	0.000687394	0.000619828
NM_001015876	702	91	168	86	110	113.75	180	398	95	170	210.75		344	365	382	322	353.25	580	607	347	613	536.75						0.0162587	0.0178212	0.0115965	0.0155697	0.0153115	0.0185242	0.0133173	0.0189962	0.0118039	0.0156604		0.000497927	0.000462467	0.000799784	0.000419589	0.000544942	0.000653423	0.00047849	0.000798063	0.000654305	0.00064607
NM_172507	88	75	198	186	122	145.25	148	364	121	145	194.5		213	496	216	720	411.25	416	859	246	627	537						0.0134	0.0210035	0.0250809	0.0172682	0.0191882	0.015231	0.0121796	0.0241952	0.010068	0.0154185		0.000308309	0.000628448	0.000452234	0.000938212	0.000581801	0.000468662	0.000677138	0.000565773	0.000669248	0.000595205
NM_026000	203	105	185	69	109	117	182	320	71	178	187.75		348	289	286	222	286.25	572	807	254	517	537.5						0.0187601	0.0196245	0.00930421	0.0154282	0.0157792	0.0187301	0.0107074	0.0141972	0.0123594	0.0139985		0.000503716	0.000366172	0.000598791	0.000289282	0.00043949	0.00064441	0.000636147	0.000584173	0.000551836	0.000604142
NM_008558	141	55	188	102	125	117.5	152	495	79	240	241.5		196	522	192	526	359	388	864	141	757	537.5						0.00982669	0.0199427	0.013754	0.0176929	0.0153041	0.0156427	0.0165629	0.0157968	0.0166644	0.0161667		0.000283702	0.000661391	0.000401986	0.000685416	0.000508124	0.000437118	0.000681079	0.000324285	0.000808008	0.000562622
NM_027342	136	91	316	144	280	207.75	251	880	138	366	408.75		182	281	247	408	279.5	478	853	379	441	537.75						0.0162587	0.0335207	0.0194175	0.039632	0.0272072	0.025831	0.0294452	0.0275945	0.0254131	0.027071		0.000263438	0.000356036	0.000517138	0.000531654	0.000417066	0.000538511	0.000672408	0.000871659	0.000470715	0.000638323
NM_019961	353	91	134	91	91	101.75	175	346	84	117	180.5		319	674	238	589	455	367	989	175	620	537.75						0.0162587	0.0142145	0.0122708	0.0128804	0.0139061	0.0180097	0.0115773	0.0167966	0.00812387	0.0136269		0.00046174	0.00085398	0.000498295	0.00076751	0.000645381	0.000413459	0.000779615	0.000402481	0.000661777	0.000564333
NM_001025427	88	276	1234	255	477	560.5	454	2630	145	871	1025		296	727	205	410	409.5	575	880	125	574	538.5						0.0493121	0.130901	0.0343851	0.0675159	0.0705284	0.0467222	0.0880011	0.0289942	0.0604777	0.0560488		0.000428448	0.000921132	0.000429203	0.00053426	0.000578261	0.00064779	0.000693692	0.000287487	0.000612677	0.000560411
NM_016660	88	276	1234	255	477	560.5	454	2630	145	871	1025		296	727	205	410	409.5	575	880	125	574	538.5						0.0493121	0.130901	0.0343851	0.0675159	0.0705284	0.0467222	0.0880011	0.0289942	0.0604777	0.0560488		0.000428448	0.000921132	0.000429203	0.00053426	0.000578261	0.00064779	0.000693692	0.000287487	0.000612677	0.000560411
NM_001166476	88	276	1234	255	477	560.5	454	2630	145	871	1025		296	727	205	410	409.5	575	880	125	574	538.5						0.0493121	0.130901	0.0343851	0.0675159	0.0705284	0.0467222	0.0880011	0.0289942	0.0604777	0.0560488		0.000428448	0.000921132	0.000429203	0.00053426	0.000578261	0.00064779	0.000693692	0.000287487	0.000612677	0.000560411
NM_001166535	88	276	1234	255	477	560.5	454	2630	145	871	1025		296	727	205	410	409.5	575	880	125	574	538.5						0.0493121	0.130901	0.0343851	0.0675159	0.0705284	0.0467222	0.0880011	0.0289942	0.0604777	0.0560488		0.000428448	0.000921132	0.000429203	0.00053426	0.000578261	0.00064779	0.000693692	0.000287487	0.000612677	0.000560411
NM_001166536	88	276	1234	255	477	560.5	454	2630	145	871	1025		296	727	205	410	409.5	575	880	125	574	538.5						0.0493121	0.130901	0.0343851	0.0675159	0.0705284	0.0467222	0.0880011	0.0289942	0.0604777	0.0560488		0.000428448	0.000921132	0.000429203	0.00053426	0.000578261	0.00064779	0.000693692	0.000287487	0.000612677	0.000560411
NM_001039356	88	276	1234	255	477	560.5	454	2630	145	871	1025		296	727	205	410	409.5	575	880	125	574	538.5						0.0493121	0.130901	0.0343851	0.0675159	0.0705284	0.0467222	0.0880011	0.0289942	0.0604777	0.0560488		0.000428448	0.000921132	0.000429203	0.00053426	0.000578261	0.00064779	0.000693692	0.000287487	0.000612677	0.000560411
NM_016896	923	211	328	123	107	192.25	152	262	32	91	134.25		1184	1358	440	694	919	510	744	141	763	539.5						0.0376988	0.0347937	0.0165858	0.0151451	0.0260558	0.0156427	0.00876665	0.00639872	0.00631857	0.00928166		0.00171379	0.00172063	0.000921217	0.000904332	0.00131499	0.000574562	0.000586485	0.000324285	0.000814412	0.000574936
NM_001012273	102	116	106	108	173	125.75	310	350	105	305	267.5		347	250	319	375	322.75	656	508	470	526	540						0.0207254	0.0112443	0.0145631	0.0244869	0.0177549	0.0319029	0.0117112	0.0209958	0.0211776	0.0214469		0.000502269	0.000316758	0.000667882	0.000488652	0.00049389	0.000739044	0.000400449	0.00108095	0.000561443	0.000695471
NM_008418	509	309	532	386	166	348.25	161	147	162	61	132.75		1104	1634	378	1180	1074	690	617	174	679	540						0.0552081	0.0564336	0.0520496	0.0234961	0.0467969	0.0165689	0.00491869	0.0323935	0.00423552	0.0145292		0.001598	0.00207033	0.000791409	0.00153763	0.00149934	0.000777348	0.000486373	0.000400181	0.000724752	0.000597164
NM_177633	470	87	339	109	87	155.5	115	227	47	91	120		308	1229	204	626	591.75	524	785	90	762	540.25						0.015544	0.0359605	0.014698	0.0123142	0.0196292	0.0118349	0.00759553	0.00939812	0.00631857	0.00878679		0.000445818	0.00155718	0.00042711	0.000815723	0.000811458	0.000590334	0.000618805	0.00020699	0.000813345	0.000557368
NM_010723	146	119	229	191	172	177.75	218	324	204	157	225.75		266	336	537	356	373.75	492	527	627	516	540.5						0.0212614	0.0242919	0.0257551	0.0243454	0.0239135	0.0224349	0.0108412	0.0407918	0.0109013	0.0212423		0.000385025	0.000425723	0.0011243	0.000463894	0.000599736	0.000554283	0.000415427	0.00144203	0.000550769	0.000740628
NM_001161770	146	119	229	191	172	177.75	218	324	204	157	225.75		266	336	537	356	373.75	492	527	627	516	540.5						0.0212614	0.0242919	0.0257551	0.0243454	0.0239135	0.0224349	0.0108412	0.0407918	0.0109013	0.0212423		0.000385025	0.000425723	0.0011243	0.000463894	0.000599736	0.000554283	0.000415427	0.00144203	0.000550769	0.000740628
NM_001161769	146	119	229	191	172	177.75	218	324	204	157	225.75		266	336	537	356	373.75	492	527	627	516	540.5						0.0212614	0.0242919	0.0257551	0.0243454	0.0239135	0.0224349	0.0108412	0.0407918	0.0109013	0.0212423		0.000385025	0.000425723	0.0011243	0.000463894	0.000599736	0.000554283	0.000415427	0.00144203	0.000550769	0.000740628
NM_001164414	623	160	344	161	170	208.75	194	319	68	200	195.25		434	1085	253	817	647.25	359	849	134	824	541.5						0.0285867	0.0364909	0.0217098	0.0240623	0.0277124	0.019965	0.0106739	0.0135973	0.013887	0.0145308		0.000628198	0.00137473	0.0005297	0.00106461	0.000899309	0.000404446	0.000669255	0.000308186	0.000879522	0.000565352
NM_026178	219	204	304	98	55	165.25	100	58	36	42	59		1189	1753	717	728	1096.75	707	582	270	610	542.25						0.0364481	0.0322478	0.0132147	0.00778485	0.0224239	0.0102912	0.00194071	0.00719856	0.00291626	0.00558669		0.00172103	0.00222111	0.00150117	0.000948637	0.00159799	0.0007965	0.000458782	0.000620971	0.000651103	0.000631839
NM_012051	494	712	2620	643	552	1131.75	184	525	105	224	259.5		1639	4933	747	1778	2274.25	362	691	229	887	542.25						0.127211	0.277925	0.0867044	0.0781316	0.142493	0.0189359	0.0175668	0.0209958	0.0155534	0.018263		0.00237239	0.00625027	0.00156398	0.00231686	0.00312587	0.000407826	0.000544706	0.000526675	0.000946768	0.000606494
NM_001083318	494	712	2620	643	552	1131.75	184	525	105	224	259.5		1639	4933	747	1778	2274.25	362	691	229	887	542.25						0.127211	0.277925	0.0867044	0.0781316	0.142493	0.0189359	0.0175668	0.0209958	0.0155534	0.018263		0.00237239	0.00625027	0.00156398	0.00231686	0.00312587	0.000407826	0.000544706	0.000526675	0.000946768	0.000606494
NM_025606	232	63	144	81	115	100.75	169	467	57	192	221.25		182	319	284	373	289.5	402	769	246	753	542.5						0.011256	0.0152753	0.0109223	0.0162774	0.0134328	0.0173922	0.015626	0.0113977	0.0133315	0.0144369		0.000263438	0.000404183	0.000594604	0.000486046	0.000437068	0.00045289	0.000606192	0.000565773	0.000803738	0.000607148
NM_001042484	118	133	375	127	187	205.5	151	416	53	251	217.75		370	673	207	522	443	430	955	239	546	542.5						0.0237627	0.0397794	0.0171251	0.0264685	0.0267839	0.0155398	0.0139196	0.0105979	0.0174281	0.0143713		0.00053556	0.000852713	0.000433391	0.000680204	0.000625467	0.000484434	0.000752813	0.000549674	0.00058279	0.000592428
NM_020585	118	133	375	127	187	205.5	151	416	53	251	217.75		370	673	207	522	443	430	955	239	546	542.5						0.0237627	0.0397794	0.0171251	0.0264685	0.0267839	0.0155398	0.0139196	0.0105979	0.0174281	0.0143713		0.00053556	0.000852713	0.000433391	0.000680204	0.000625467	0.000484434	0.000752813	0.000549674	0.00058279	0.000592428
NM_025845	523	161	393	218	205	244.25	283	411	104	210	252		877	929	207	661	668.5	752	553	191	676	543						0.0287654	0.0416888	0.0293959	0.0290163	0.0322166	0.0291242	0.0137523	0.0207958	0.0145813	0.0195634		0.00126942	0.00117707	0.000433391	0.000861331	0.000935304	0.000847197	0.000435922	0.000439279	0.00072155	0.000610987
NM_001036293	268	73	188	70	94	106.25	151	250	41	142	146		457	967	304	592	580	408	854	155	756	543.25						0.0130427	0.0199427	0.00943905	0.013305	0.0139324	0.0155398	0.00836512	0.00819836	0.00985974	0.0104907		0.00066149	0.00122522	0.000636477	0.000771419	0.000823651	0.000459649	0.000673196	0.000356483	0.000806941	0.000574067
NM_025334	151	177	298	181	165	205.25	335	606	97	193	307.75		318	528	262	483	397.75	539	954	211	470	543.5						0.0316241	0.0316113	0.0244067	0.0233546	0.0277492	0.0344757	0.0202771	0.0193961	0.0134009	0.0218874		0.000460293	0.000668993	0.000548543	0.000629384	0.000576803	0.000607233	0.000752025	0.000485277	0.000501669	0.000586551
NM_001033305	109	132	246	128	267	193.25	330	743	137	390	400		221	407	409	600	409.25	511	755	487	421	543.5						0.0235841	0.0260953	0.01726	0.0377919	0.0261828	0.0339611	0.0248611	0.0273945	0.0270796	0.0283241		0.000319889	0.000515682	0.000856313	0.000781844	0.000618432	0.000575688	0.000595156	0.00112005	0.000449368	0.000685065
NM_001164412	620	161	348	162	176	211.75	195	320	68	203	196.5		434	1088	253	859	658.5	360	852	136	827	543.75						0.0287654	0.0369152	0.0218447	0.0249115	0.0281092	0.0200679	0.0107074	0.0135973	0.0140953	0.014617		0.000628198	0.00137853	0.0005297	0.00111934	0.000913942	0.000405573	0.00067162	0.000312785	0.000882725	0.000568176
NM_175557	565	215	659	248	235	339.25	219	369	122	160	217.5		476	1175	280	773	676	388	901	141	746	544						0.0384134	0.0699056	0.0334412	0.0332626	0.0437557	0.0225378	0.0123469	0.0243951	0.0111096	0.0175974		0.000688991	0.00148876	0.000586229	0.00100728	0.000942815	0.000437118	0.000710246	0.000324285	0.000796267	0.000566979
NM_026277	384	42	204	73	138	114.25	166	549	52	221	247		225	417	321	435	349.5	484	785	226	682	544.25						0.00750402	0.02164	0.00984358	0.0195329	0.0146301	0.0170835	0.0183698	0.0103979	0.0153451	0.0152991		0.000325679	0.000528352	0.00067207	0.000566837	0.000523234	0.00054527	0.000618805	0.000519776	0.000727954	0.000602951
NM_008520	1234	106	262	111	155	158.5	186	450	87	157	220		466	487	183	500	409	671	555	179	779	546						0.0189387	0.0277925	0.0149676	0.0219391	0.0209095	0.0191417	0.0150572	0.0173965	0.0109013	0.0156242		0.000674517	0.000617045	0.000383143	0.000651536	0.00058156	0.000755943	0.000437499	0.000411681	0.00083149	0.000609153
NM_007544	176	83	143	109	88	105.75	96	270	39	130	133.75		302	601	360	482	436.25	542	693	188	762	546.25						0.0148294	0.0151692	0.014698	0.0124558	0.0142881	0.00987959	0.00903433	0.00779844	0.00902652	0.00893472		0.000437133	0.000761486	0.000753723	0.000628081	0.000645106	0.000610613	0.000546282	0.00043238	0.000813345	0.000600655
NM_026042	180	209	661	152	258	320	255	770	96	254	343.75		512	697	241	468	479.5	483	936	254	514	546.75						0.0373414	0.0701177	0.0204962	0.036518	0.0411184	0.0262427	0.0257646	0.0191962	0.0176364	0.02221		0.0007411	0.000883121	0.000504576	0.000609838	0.000684659	0.000544144	0.000737836	0.000584173	0.000548634	0.000603697
NM_009424	511	257	678	265	136	334	71	58	58	20	51.75		1138	2841	535	1419	1483.25	410	829	177	772	547						0.0459175	0.0719211	0.0357335	0.0192498	0.0432055	0.00730678	0.00194071	0.0115977	0.0013887	0.00555847		0.00164721	0.00359964	0.00112012	0.00184906	0.00205401	0.000461903	0.000653489	0.000407081	0.000824019	0.000586623
NM_028207	166	73	322	138	214	186.75	190	776	88	353	351.75		84	680	155	496	353.75	222	1020	97	850	547.25						0.0130427	0.0341572	0.0186084	0.0302902	0.0240246	0.0195534	0.0259653	0.0175965	0.0245105	0.0219064		0.000121587	0.000861582	0.00032452	0.000646324	0.000488503	0.000250103	0.000804052	0.00022309	0.000907274	0.00054613
NM_001111025	233	108	220	96	102	131.5	134	308	73	132	161.75		446	505	430	460	460.25	727	714	404	344	547.25						0.0192961	0.0233372	0.012945	0.0144374	0.0175039	0.0137903	0.0103058	0.0145971	0.00916539	0.0119646		0.000645568	0.000639851	0.00090028	0.000599413	0.000696278	0.000819032	0.000562836	0.000929156	0.000367179	0.000669551
NM_001164327	257	165	98	141	293	174.25	244	354	89	253	235		457	356	459	1036	577	551	519	321	798	547.25						0.0294801	0.0103957	0.0190129	0.041472	0.0250902	0.0251106	0.011845	0.0177964	0.017567	0.0180798		0.00066149	0.000451063	0.000960997	0.00134998	0.000855883	0.000620752	0.00040912	0.000738265	0.000851771	0.000654977
NM_172457	198	146	332	162	181	205.25	150	394	80	212	209		225	632	289	469	403.75	424	669	234	865	548						0.0260854	0.035218	0.0218447	0.0256192	0.0271918	0.0154369	0.0131834	0.0159968	0.0147202	0.0148343		0.000325679	0.000800764	0.000605072	0.000611141	0.000585664	0.000477675	0.000527363	0.000538175	0.000923285	0.000616625
NM_010941	343	116	119	86	161	120.5	397	330	60	264	262.75		316	342	165	641	366	724	529	132	809	548.5						0.0207254	0.0126233	0.0115965	0.0227884	0.0169334	0.0408562	0.011042	0.0119976	0.0183308	0.0205566		0.000457398	0.000433325	0.000345456	0.000835269	0.000517862	0.000815652	0.000417003	0.000303586	0.000863512	0.000599938
NM_008437	400	116	214	452	71	213.25	199	366	283	94	235.5		263	535	1275	262	583.75	391	522	998	284	548.75						0.0207254	0.0227008	0.0609493	0.0100495	0.0286062	0.0204796	0.0122465	0.0565887	0.00652687	0.0239604		0.000380682	0.000677862	0.00266944	0.000341405	0.00101735	0.000440497	0.000411485	0.00229529	0.000303136	0.000862603
NM_001159589	679	105	324	156	94	169.75	109	252	51	64	119		662	1646	242	996	886.5	442	1065	138	553	549.5						0.0187601	0.0343694	0.0210356	0.013305	0.0218675	0.0112175	0.00843204	0.010198	0.00444383	0.00857282		0.000958219	0.00208553	0.000506669	0.00129786	0.00121207	0.000497954	0.000839525	0.000317385	0.000590262	0.000561281
NM_001172146	301	58	219	112	199	147	198	715	118	338	342.25		222	412	405	477	379	415	740	339	708	550.5						0.0103627	0.0232311	0.0151025	0.028167	0.0192158	0.0203767	0.0239242	0.0235953	0.023469	0.0228413		0.000321336	0.000522017	0.000847938	0.000621566	0.000578214	0.000467536	0.000583332	0.000779663	0.000755706	0.000646559
NM_009372	253	505	994	438	372	577.25	204	613	163	251	307.75		904	2032	556	1010	1125.5	280	1008	223	692	550.75						0.0902269	0.105442	0.0590615	0.0526539	0.076846	0.0209941	0.0205113	0.0325935	0.0174281	0.0228818		0.0013085	0.00257461	0.00116408	0.0013161	0.00159083	0.000315446	0.000794592	0.000512876	0.000738628	0.000590386
NM_024464	235	108	226	96	104	133.5	136	306	73	131	161.5		445	503	431	461	460	736	714	405	351	551.5						0.0192961	0.0239737	0.012945	0.0147205	0.0177338	0.0139961	0.0102389	0.0145971	0.00909596	0.011982		0.00064412	0.000637317	0.000902374	0.000600716	0.000696132	0.000829172	0.000562836	0.000931456	0.000374651	0.000674529
NM_001001493	87	101	269	112	238	180	168	667	107	295	309.25		339	771	202	601	478.25	429	732	238	808	551.75						0.0180454	0.0285351	0.0151025	0.0336872	0.0238425	0.0172893	0.0223181	0.0213957	0.0204833	0.0203716		0.000490689	0.000976882	0.000422922	0.000783147	0.00066841	0.000483308	0.000577025	0.000547374	0.000862444	0.000617538
NM_026438	270	152	248	200	189	197.25	337	690	128	233	347		173	540	224	557	373.5	381	975	186	669	552.75						0.0271574	0.0263074	0.0269687	0.0267516	0.0267963	0.0346815	0.0230877	0.0255949	0.0161783	0.0248856		0.000250411	0.000684197	0.000468983	0.000725811	0.000532351	0.000429231	0.000768579	0.00042778	0.000714078	0.000584917
NM_138656	382	90	167	55	97	102.25	255	260	41	137	173.25		497	392	218	360	366.75	1088	464	190	471	553.25						0.01608	0.0177151	0.0074164	0.0137297	0.0137353	0.0262427	0.00869973	0.00819836	0.00951257	0.0131633		0.000719388	0.000496677	0.000456421	0.000469106	0.000535398	0.00122573	0.000365765	0.00043698	0.000502737	0.000632803
NM_178890	1005	157	373	140	89	189.75	38	165	89	32	81		2450	4358	1285	2350	2610.75	343	771	502	597	553.25						0.0280507	0.0395672	0.0188781	0.0125973	0.0247733	0.00391067	0.00552098	0.0177964	0.00222191	0.0073625		0.00354628	0.00552173	0.00269037	0.00306222	0.00370515	0.000386421	0.000607769	0.00115455	0.000637227	0.000696491
NM_145426	330	180	267	265	289	250.25	436	915	269	381	500.25		273	420	223	616	383	528	686	235	766	553.75						0.0321601	0.0283229	0.0357335	0.0409059	0.0342806	0.0448698	0.0306163	0.0537892	0.0264547	0.0389325		0.000395157	0.000532153	0.00046689	0.000802693	0.000549223	0.00059484	0.000540764	0.000540475	0.000817614	0.000623423
NM_180599	330	180	267	265	289	250.25	436	915	269	381	500.25		273	420	223	616	383	528	686	235	766	553.75						0.0321601	0.0283229	0.0357335	0.0409059	0.0342806	0.0448698	0.0306163	0.0537892	0.0264547	0.0389325		0.000395157	0.000532153	0.00046689	0.000802693	0.000549223	0.00059484	0.000540764	0.000540475	0.000817614	0.000623423
NM_001206385	484	77	149	72	192	122.5	273	523	75	274	286.25		281	368	274	488	352.75	654	746	165	652	554.25						0.0137574	0.0158057	0.00970874	0.0271762	0.016612	0.0280951	0.0174998	0.014997	0.0190251	0.0199043		0.000406736	0.000466268	0.000573667	0.000635899	0.000520643	0.000736791	0.000588061	0.000379482	0.000695933	0.000600067
NM_144888	484	77	149	72	192	122.5	273	523	75	274	286.25		281	368	274	488	352.75	654	746	165	652	554.25						0.0137574	0.0158057	0.00970874	0.0271762	0.016612	0.0280951	0.0174998	0.014997	0.0190251	0.0199043		0.000406736	0.000466268	0.000573667	0.000635899	0.000520643	0.000736791	0.000588061	0.000379482	0.000695933	0.000600067
NM_009280	399	115	326	142	168	187.75	201	530	70	218	254.75		249	493	270	315	331.75	363	954	148	756	555.25						0.0205467	0.0345815	0.0191478	0.0237792	0.0245138	0.0206854	0.0177341	0.0139972	0.0151368	0.0168884		0.000360418	0.000624647	0.000565292	0.000410468	0.000490206	0.000408953	0.000752025	0.000340384	0.000806941	0.000577076
NM_026553	274	70	149	44	139	100.5	181	455	63	204	225.75		248	390	391	397	356.5	617	758	295	551	555.25						0.0125067	0.0158057	0.00593312	0.0196745	0.01348	0.0186271	0.0152245	0.0125975	0.0141647	0.0151535		0.00035897	0.000494143	0.000818627	0.00051732	0.000547265	0.000695107	0.000597521	0.000678468	0.000588127	0.000639806
NM_025301	157	93	183	121	196	148.25	231	582	88	292	298.25		350	332	307	411	350	493	672	353	704	555.5						0.016616	0.0194123	0.0163161	0.0277424	0.0200217	0.0237728	0.019474	0.0175965	0.020275	0.0202796		0.000506611	0.000420655	0.000642758	0.000535563	0.000526397	0.00055541	0.000529728	0.000811862	0.000751437	0.000662109
NM_020256	652	75	161	134	111	120.25	205	454	99	181	234.75		288	612	114	590	401	662	735	168	661	556.5						0.0134	0.0170786	0.018069	0.0157113	0.0160647	0.021097	0.0151911	0.019796	0.0125677	0.017163		0.000416869	0.000775424	0.000238679	0.000768813	0.000549946	0.000745804	0.00057939	0.000386382	0.000705539	0.000604279
NM_001079513	652	75	161	134	111	120.25	205	454	99	181	234.75		288	612	114	590	401	662	735	168	661	556.5						0.0134	0.0170786	0.018069	0.0157113	0.0160647	0.021097	0.0151911	0.019796	0.0125677	0.017163		0.000416869	0.000775424	0.000238679	0.000768813	0.000549946	0.000745804	0.00057939	0.000386382	0.000705539	0.000604279
NM_009720	49	404	1323	423	506	664	708	2066	198	790	940.5		739	329	366	188	405.5	959	395	562	310	556.5						0.0721815	0.140342	0.0570388	0.0716207	0.0852956	0.072862	0.0691294	0.0395921	0.0548535	0.0591092		0.00106967	0.000416854	0.000766285	0.000244978	0.000624447	0.0010804	0.000311373	0.00129254	0.000330888	0.000753801
NM_001113461	589	86	188	54	89	104.25	137	211	29	163	135		494	993	170	854	627.75	445	733	69	982	557.25						0.0153654	0.0199427	0.00728155	0.0125973	0.0137967	0.014099	0.00706016	0.00579884	0.0113179	0.00956897		0.000715046	0.00125816	0.000355925	0.00111282	0.000860489	0.000501333	0.000577814	0.000158693	0.00104817	0.000571502
NM_028303	121	100	218	103	161	145.5	126	443	67	204	210		287	605	278	516	421.5	378	812	246	794	557.5						0.0178667	0.0231251	0.0138889	0.0227884	0.0194173	0.012967	0.014823	0.0133973	0.0141647	0.013838		0.000415421	0.000766554	0.000582042	0.000672385	0.000609101	0.000425852	0.000640088	0.000565773	0.000847501	0.000619804
NM_054057	255	166	362	117	175	205	244	515	90	211	265		544	826	380	578	582	495	635	287	814	557.75						0.0296587	0.0384003	0.0157767	0.02477	0.0271514	0.0251106	0.0172321	0.0179964	0.0146507	0.0187475		0.000787419	0.00104657	0.000795597	0.000753176	0.00084569	0.000557663	0.000500562	0.000660069	0.000868849	0.000646786
NM_001083110	559	65	182	75	126	112	179	436	68	159	210.5		231	384	325	432	343	761	459	251	761	558						0.0116134	0.0193062	0.0101133	0.0178344	0.0147168	0.0184213	0.0145888	0.0135973	0.0110401	0.0144119		0.000334363	0.00048654	0.000680444	0.000562927	0.000516069	0.000857336	0.000361823	0.000577273	0.000812277	0.000652177
NM_001037713	254	152	100	158	306	179	211	486	113	279	272.25		404	339	398	719	465	454	732	315	731	558						0.0271574	0.0106078	0.0213053	0.0433121	0.0255957	0.0217145	0.0162618	0.0225955	0.0193723	0.019986		0.000584774	0.000429524	0.000833283	0.000936909	0.000696122	0.000511473	0.000577025	0.000724466	0.000780256	0.000648305
NM_010046	479	95	300	51	39	121.25	135	179	35	41	97.5		714	1072	259	340	596.25	866	577	352	437	558						0.0169734	0.0318235	0.00687702	0.00552017	0.0152985	0.0138932	0.00598943	0.0069986	0.00284683	0.00743201		0.00103349	0.00135826	0.000542262	0.000443045	0.000844263	0.000975628	0.000454841	0.000809562	0.000466446	0.000676619
NM_001163419	352	59	182	111	90	110.5	147	376	74	147	186		320	546	113	649	407	454	781	163	836	558.5						0.0105414	0.0193062	0.0149676	0.0127389	0.0143885	0.0151281	0.0125811	0.014797	0.0102069	0.0131783		0.000463187	0.0006918	0.000236585	0.000845694	0.000559317	0.000511473	0.000615651	0.000374882	0.000892331	0.000598584
NM_144559	230	111	79	121	162	118.25	173	180	121	158	158		615	192	588	567	490.5	736	364	649	488	559.25						0.0198321	0.00838018	0.0163161	0.0229299	0.0168646	0.0178038	0.00602289	0.0241952	0.0109707	0.0147481		0.000890188	0.00024327	0.00123108	0.000738842	0.000775845	0.000829172	0.000286936	0.00149263	0.000520882	0.000782405
NM_138585	919	152	320	215	357	261	544	829	221	493	521.75		196	635	92	733	414	441	728	103	966	559.5						0.0271574	0.0339451	0.0289914	0.0505308	0.0351562	0.0559844	0.0277387	0.0441912	0.0342314	0.0405364		0.000283702	0.000804565	0.000192618	0.000955152	0.000559009	0.000496827	0.000573872	0.000236889	0.00103109	0.00058467
NM_001081356	82	203	607	204	251	316.25	222	805	109	328	366		307	773	91	574	436.25	351	1164	71	654	560						0.0362694	0.0643895	0.0275081	0.0355272	0.0409236	0.0228466	0.0269357	0.0217956	0.0227746	0.0235881		0.00044437	0.000979416	0.000190524	0.000747964	0.000590569	0.000395434	0.000917565	0.000163292	0.000698068	0.00054359
NM_134103	341	75	131	128	99	108.25	128	254	73	110	141.25		466	611	347	615	509.75	671	654	300	616	560.25						0.0134	0.0138963	0.01726	0.0140127	0.0146423	0.0131728	0.00849896	0.0145971	0.00763783	0.0109767		0.000674517	0.000774157	0.000726505	0.00080139	0.000744142	0.000755943	0.000515539	0.000689968	0.000657507	0.000654739
NM_145209	492	347	72	157	290	216.5	252	317	92	127	197		1127	295	633	1223	819.5	863	600	340	438	560.25						0.0619975	0.00763764	0.0211704	0.0410474	0.0329632	0.0259339	0.010607	0.0183963	0.00881822	0.0159389		0.00163129	0.000373774	0.0013253	0.00159366	0.001231	0.000972249	0.000472972	0.000781963	0.000467513	0.000673674
NM_145384	274	85	101	145	92	105.75	227	344	93	158	205.5		279	370	334	475	364.5	452	775	265	750	560.5						0.0151867	0.0107139	0.0195523	0.0130219	0.0146187	0.0233611	0.0115104	0.0185963	0.0109707	0.0161096		0.000403842	0.000468802	0.000699288	0.000618959	0.000547723	0.000509219	0.000610922	0.000609471	0.000800536	0.000632537
NM_145585	331	100	156	123	129	127	252	557	117	241	291.75		246	382	192	409	307.25	404	877	227	736	561						0.0178667	0.0165482	0.0165858	0.018259	0.0173149	0.0259339	0.0186375	0.0233953	0.0167338	0.0211751		0.000356075	0.000484006	0.000401986	0.000532957	0.000443756	0.000455143	0.000691327	0.000522076	0.000785593	0.000613535
NM_016981	801	102	103	119	102	106.5	259	286	110	130	196.25		409	999	158	790	589	565	697	96	886	561						0.018224	0.0109261	0.0160464	0.0144374	0.0149085	0.0266543	0.0095697	0.0219956	0.00902652	0.0168115		0.000592011	0.00126577	0.000330801	0.00102943	0.000804501	0.000636524	0.000549435	0.00022079	0.0009457	0.000588112
NM_001111023	432	118	391	124	186	204.75	126	276	37	131	142.5		290	1177	114	756	584.25	278	952	99	917	561.5						0.0210827	0.0414766	0.0167206	0.026327	0.0264017	0.012967	0.00923509	0.00739852	0.00909596	0.00967413		0.000419764	0.0014913	0.000238679	0.000985123	0.000783716	0.000313193	0.000750448	0.000227689	0.000978789	0.00056753
NM_009642	142	103	112	82	110	101.75	168	281	114	116	169.75		189	310	337	394	307.5	427	873	448	499	561.75						0.0184027	0.0118808	0.0110572	0.0155697	0.0142276	0.0172893	0.0094024	0.0227954	0.00805444	0.0143854		0.00027357	0.00039278	0.000705569	0.000513411	0.000471332	0.000481055	0.000688174	0.00103035	0.000532623	0.000683051
NM_007388	308	62	138	81	189	117.5	82	236	81	114	128.25		393	455	332	1083	565.75	270	857	439	682	562						0.0110774	0.0146388	0.0109223	0.0267516	0.0158475	0.00843882	0.00789667	0.0161968	0.00791557	0.010112		0.000568852	0.0005765	0.0006951	0.00141123	0.00081292	0.00030418	0.000675561	0.00100965	0.000727954	0.000679337
NM_001102404	308	62	138	81	189	117.5	82	236	81	114	128.25		393	455	332	1083	565.75	270	857	439	682	562						0.0110774	0.0146388	0.0109223	0.0267516	0.0158475	0.00843882	0.00789667	0.0161968	0.00791557	0.010112		0.000568852	0.0005765	0.0006951	0.00141123	0.00081292	0.00030418	0.000675561	0.00100965	0.000727954	0.000679337
NM_001102405	308	62	138	81	189	117.5	82	236	81	114	128.25		393	455	332	1083	565.75	270	857	439	682	562						0.0110774	0.0146388	0.0109223	0.0267516	0.0158475	0.00843882	0.00789667	0.0161968	0.00791557	0.010112		0.000568852	0.0005765	0.0006951	0.00141123	0.00081292	0.00030418	0.000675561	0.00100965	0.000727954	0.000679337
NM_153414	668	77	173	80	195	131.25	286	587	96	302	317.75		114	459	116	606	323.75	381	864	85	919	562.25						0.0137574	0.0183515	0.0107875	0.0276008	0.0176243	0.029433	0.0196413	0.0191962	0.0209693	0.0223099		0.000165011	0.000581568	0.000242866	0.000789662	0.000444777	0.000429231	0.000681079	0.000195491	0.000980924	0.000571681
NM_001166623	372	82	165	114	142	125.75	181	576	89	230	269		243	373	238	434	322	512	653	193	894	563						0.0146507	0.0175029	0.0153722	0.0200991	0.0169062	0.0186271	0.0192732	0.0177964	0.01597	0.0179167		0.000351733	0.000472603	0.000498295	0.000565533	0.000472041	0.000576815	0.000514751	0.000443879	0.000954239	0.000622421
NM_011252	372	82	165	114	142	125.75	181	576	89	230	269		243	373	238	434	322	512	653	193	894	563						0.0146507	0.0175029	0.0153722	0.0200991	0.0169062	0.0186271	0.0192732	0.0177964	0.01597	0.0179167		0.000351733	0.000472603	0.000498295	0.000565533	0.000472041	0.000576815	0.000514751	0.000443879	0.000954239	0.000622421
NM_194336	592	110	84	125	109	107	103	306	94	107	152.5		577	490	269	795	532.75	368	983	209	692	563						0.0196534	0.00891058	0.0168554	0.0154282	0.0152119	0.0106	0.0102389	0.0187962	0.00742952	0.0117662		0.000835185	0.000620846	0.000563199	0.00103594	0.000763793	0.000414586	0.000774885	0.000480677	0.000738628	0.000602194
NM_026456	93	179	675	216	364	358.5	293	909	137	474	453.25		341	650	313	637	485.25	313	1000	295	648	564						0.0319814	0.0716028	0.0291262	0.0515216	0.046058	0.0301533	0.0304156	0.0273945	0.0329121	0.0302189		0.000493584	0.000823571	0.00065532	0.000830057	0.000700633	0.000352623	0.000788286	0.000678468	0.000691663	0.00062776
NM_172276	926	94	151	93	90	107	170	240	80	117	151.75		419	694	296	541	487.5	561	682	215	800	564.5						0.0167947	0.0160178	0.0125405	0.0127389	0.014523	0.0174951	0.00803052	0.0159968	0.00812387	0.0124116		0.000606486	0.00087932	0.000619728	0.000704962	0.000702624	0.000632018	0.000537611	0.000494477	0.000853905	0.000629503
NM_011579	396	259	64	205	521	262.25	324	477	110	311	305.5		473	249	253	1645	655	484	824	207	745	565						0.0462748	0.00678901	0.0276429	0.0737438	0.0386126	0.0333436	0.0159607	0.0219956	0.0215942	0.0232235		0.000684649	0.000315491	0.0005297	0.00214355	0.000918349	0.00054527	0.000649548	0.000476078	0.000795199	0.000616524
NM_023215	205	115	240	121	134	152.5	145	449	74	188	214		454	552	334	450	447.5	545	627	221	870	565.75						0.0205467	0.0254588	0.0163161	0.0189667	0.0203221	0.0149223	0.0150238	0.014797	0.0130537	0.0144492		0.000657147	0.000699402	0.000699288	0.000586383	0.000660555	0.000613992	0.000494255	0.000508276	0.000928622	0.000636287
NM_001042501	226	221	1018	440	267	486.5	89	151	61	80	95.25		4359	3591	3024	1281	3063.75	760	785	264	457	566.5						0.0394854	0.107988	0.0593312	0.0377919	0.0611491	0.00915921	0.00505253	0.0121976	0.00555478	0.00799102		0.00630948	0.00454991	0.00633127	0.00166924	0.00471498	0.00085621	0.000618805	0.000607172	0.000487793	0.000642495
NM_028298	522	168	414	167	112	215.25	125	228	78	91	130.5		690	2343	277	1433	1185.75	473	888	200	708	567.25						0.0300161	0.0439164	0.0225189	0.0158528	0.028076	0.0128641	0.00762899	0.0155969	0.00631857	0.0106021		0.000998748	0.00296866	0.000579948	0.0018673	0.00160366	0.000532878	0.000699998	0.000459978	0.000755706	0.00061214
NM_181070	187	353	723	393	404	468.25	516	1128	235	473	588		426	734	235	569	491	664	688	197	721	567.5						0.0630695	0.0766946	0.0529935	0.0571833	0.0624852	0.0531028	0.0377434	0.0469906	0.0328427	0.0426699		0.000616618	0.000930002	0.000492014	0.000741448	0.00069502	0.000748057	0.000542341	0.000453079	0.000769582	0.000628265
NM_019812	718	116	343	163	105	181.75	110	270	52	69	125.25		704	1692	273	1017	921.5	469	1081	147	574	567.75						0.0207254	0.0363849	0.0219795	0.014862	0.0234879	0.0113204	0.00903433	0.0103979	0.004791	0.0088859		0.00101901	0.00214382	0.000571573	0.00132522	0.00126491	0.000528372	0.000852137	0.000338084	0.000612677	0.000582817
NM_001164075	286	512	1040	444	388	596	209	625	166	257	314.25		951	2122	579	1034	1171.5	302	1010	239	720	567.75						0.0914776	0.110321	0.0598706	0.0549186	0.079147	0.0215087	0.0209128	0.0331934	0.0178447	0.0233649		0.00137654	0.00268864	0.00121224	0.00134738	0.0016562	0.000340231	0.000796169	0.000549674	0.000768515	0.000613647
NM_001177706	373	104	180	113	145	135.5	303	406	96	184	247.25		419	291	408	411	382.25	697	647	332	597	568.25						0.0185814	0.0190941	0.0152373	0.0205237	0.0183591	0.0311825	0.013585	0.0191962	0.012776	0.0191849		0.000606486	0.000368706	0.000854219	0.000535563	0.000591244	0.000785234	0.000510021	0.000763564	0.000637227	0.000674012
NM_001177709	373	104	180	113	145	135.5	303	406	96	184	247.25		419	291	408	411	382.25	697	647	332	597	568.25						0.0185814	0.0190941	0.0152373	0.0205237	0.0183591	0.0311825	0.013585	0.0191962	0.012776	0.0191849		0.000606486	0.000368706	0.000854219	0.000535563	0.000591244	0.000785234	0.000510021	0.000763564	0.000637227	0.000674012
NM_001111021	446	123	400	128	190	210.25	126	280	37	137	145		297	1215	121	779	603	289	964	99	922	568.5						0.0219761	0.0424313	0.01726	0.0268931	0.0271401	0.012967	0.00936894	0.00739852	0.00951257	0.00981175		0.000429896	0.00153944	0.000253335	0.00101509	0.000809442	0.000325585	0.000759908	0.000227689	0.000984126	0.000574327
NM_001177707	375	104	181	113	145	135.75	303	408	96	185	248		419	294	408	412	383.25	701	647	332	597	569.25						0.0185814	0.0192002	0.0152373	0.0205237	0.0183856	0.0311825	0.0136519	0.0191962	0.0128454	0.019219		0.000606486	0.000372507	0.000854219	0.000536866	0.00059252	0.000789741	0.000510021	0.000763564	0.000637227	0.000675138
NM_001177708	375	104	181	113	145	135.75	303	408	96	185	248		419	294	408	412	383.25	701	647	332	597	569.25						0.0185814	0.0192002	0.0152373	0.0205237	0.0183856	0.0311825	0.0136519	0.0191962	0.0128454	0.019219		0.000606486	0.000372507	0.000854219	0.000536866	0.00059252	0.000789741	0.000510021	0.000763564	0.000637227	0.000675138
NM_007596	275	89	150	120	138	124.25	168	352	107	164	197.75		182	585	266	516	387.25	380	1016	253	628	569.25						0.0159014	0.0159117	0.0161812	0.0195329	0.0168818	0.0172893	0.0117781	0.0213957	0.0113873	0.0154626		0.000263438	0.000741214	0.000556918	0.000672385	0.000558489	0.000428105	0.000800899	0.000581873	0.000670316	0.000620298
NM_175655	84	7681	14482	4234	8219	8654	9106	20378	2512	9395	10347.8		774	600	433	886	673.25	376	999	330	583	572						1.37234	1.53623	0.570928	1.16334	1.16071	0.937121	0.681858	0.5023	0.65234	0.693404		0.00112033	0.000760219	0.000906561	0.00115452	0.000985409	0.000423598	0.000787498	0.000758964	0.000622284	0.000648086
NM_138607	320	172	326	268	250	254	404	687	221	346	414.5		409	516	242	346	378.25	732	605	290	670	574.25						0.0307307	0.0345815	0.0361381	0.0353857	0.034209	0.0415766	0.0229874	0.0441912	0.0240244	0.0331949		0.000592011	0.000653789	0.000506669	0.000450863	0.000550833	0.000824665	0.000476913	0.000666969	0.000715146	0.000670923
NM_001253865	444	58	187	84	79	102	174	379	58	114	181.25		230	643	134	585	398	418	950	86	845	574.75						0.0103627	0.0198366	0.0113269	0.0111819	0.013177	0.0179068	0.0126815	0.0115977	0.00791557	0.0125254		0.000332916	0.000814702	0.000280552	0.000762297	0.000547617	0.000470915	0.000748872	0.000197791	0.000901938	0.000579879
NM_019746	107	57	156	91	96	100	97	321	66	135	154.75		351	327	330	286	323.5	633	726	328	615	575.5						0.010184	0.0165482	0.0122708	0.0135881	0.0131478	0.0099825	0.0107408	0.0131974	0.0093737	0.0108236		0.000508059	0.000414319	0.000690913	0.000372679	0.000496492	0.000713133	0.000572296	0.000754365	0.00065644	0.000674058
NM_025381	100	471	1123	401	531	631.5	566	1420	197	738	730.25		431	570	404	396	450.25	390	1018	301	595	576						0.0841522	0.119126	0.0540723	0.0751592	0.0831274	0.0582484	0.0475139	0.0393921	0.0512429	0.0490993		0.000623856	0.000722208	0.000845845	0.000516017	0.000676981	0.000439371	0.000802475	0.000692268	0.000635092	0.000642301
NM_009911	340	350	1488	467	202	626.75	178	1211	61	160	402.5		694	2694	859	480	1181.75	233	1591	129	355	577						0.0625335	0.157844	0.062972	0.0285916	0.0779854	0.0183184	0.0405206	0.0121976	0.0111096	0.0205365		0.00100454	0.00341338	0.00179847	0.000625475	0.00171047	0.000262496	0.00125416	0.000296686	0.00037892	0.000548066
NM_001145952	594	78	153	109	134	118.5	166	404	112	201	220.75		357	485	146	733	430.25	479	794	91	949	578.25						0.013936	0.01623	0.014698	0.0189667	0.0159577	0.0170835	0.013518	0.0223955	0.0139564	0.0167384		0.000516744	0.000614511	0.000305677	0.000955152	0.000598021	0.000539637	0.000625899	0.00020929	0.00101295	0.000596943
NM_178665	594	78	153	109	134	118.5	166	404	112	201	220.75		357	485	146	733	430.25	479	794	91	949	578.25						0.013936	0.01623	0.014698	0.0189667	0.0159577	0.0170835	0.013518	0.0223955	0.0139564	0.0167384		0.000516744	0.000614511	0.000305677	0.000955152	0.000598021	0.000539637	0.000625899	0.00020929	0.00101295	0.000596943
NM_001164413	691	169	369	170	185	223.25	202	337	71	209	204.75		457	1169	259	910	698.75	366	926	136	885	578.25						0.0301947	0.0391429	0.0229234	0.0261854	0.0296116	0.0207883	0.0112762	0.0141972	0.0145119	0.0151934		0.00066149	0.00148116	0.000542262	0.0011858	0.000967677	0.000412333	0.000729953	0.000312785	0.000944633	0.000599926
NM_001161369	368	112	327	138	171	187	198	527	70	220	253.75		267	508	284	334	348.25	411	966	155	782	578.5						0.0200107	0.0346876	0.0186084	0.0242038	0.0243776	0.0203767	0.0176337	0.0139972	0.0152757	0.0168208		0.000386472	0.000643652	0.000594604	0.000435226	0.000514989	0.000463029	0.000761484	0.000356483	0.000834692	0.000603922
NM_029211	308	159	190	126	152	156.75	299	466	148	179	273		274	607	307	689	469.25	408	903	280	726	579.25						0.0284081	0.0201549	0.0169903	0.0215145	0.0217669	0.0307708	0.0155926	0.0295941	0.0124288	0.0220966		0.000396604	0.000769088	0.000642758	0.000897817	0.000676567	0.000459649	0.000711822	0.00064397	0.000774919	0.00064759
NM_177662	293	122	260	162	125	167.25	236	399	90	149	218.5		346	512	371	583	453	604	793	249	672	579.5						0.0217974	0.0275804	0.0218447	0.0176929	0.0222288	0.0242873	0.0133507	0.0179964	0.0103458	0.0164951		0.000500821	0.00064872	0.000776754	0.000759691	0.000671497	0.000680461	0.000625111	0.000572673	0.00071728	0.000648881
NM_001253700	149	76	194	76	145	122.75	100	354	113	140	176.75		407	729	246	662	511	566	924	319	509	579.5						0.0135787	0.0205792	0.0102481	0.0205237	0.0162324	0.0102912	0.011845	0.0225955	0.00972087	0.0136132		0.000589117	0.000923666	0.000515044	0.000862634	0.000722615	0.000637651	0.000728376	0.000733666	0.000543297	0.000660748
NM_021519	129	265	677	275	387	401	504	943	228	474	537.25		471	429	372	310	395.5	755	654	372	543	581						0.0473468	0.071815	0.037082	0.0547771	0.0527552	0.0518679	0.0315532	0.0455909	0.0329121	0.040481		0.000681754	0.000543557	0.000778847	0.000403952	0.000602028	0.000850577	0.000515539	0.00085556	0.000579588	0.000700316
NM_001164107	403	140	198	144	184	166.5	426	597	168	267	364.5		291	425	365	628	427.25	546	664	325	792	581.75						0.0250134	0.0210035	0.0194175	0.0260439	0.0228696	0.0438407	0.0199759	0.0335933	0.0185391	0.0289872		0.000421211	0.000538489	0.000764191	0.00081833	0.000635555	0.000615119	0.000523422	0.000747465	0.000845366	0.000682843
NM_001164108	403	140	198	144	184	166.5	426	597	168	267	364.5		291	425	365	628	427.25	546	664	325	792	581.75						0.0250134	0.0210035	0.0194175	0.0260439	0.0228696	0.0438407	0.0199759	0.0335933	0.0185391	0.0289872		0.000421211	0.000538489	0.000764191	0.00081833	0.000635555	0.000615119	0.000523422	0.000747465	0.000845366	0.000682843
NM_009298	336	55	198	76	100	107.25	136	195	48	106	121.25		626	303	525	257	427.75	1005	432	367	525	582.25						0.00982669	0.0210035	0.0102481	0.0141543	0.0138081	0.0139961	0.00652479	0.00959808	0.00736009	0.00936976		0.00090611	0.000383911	0.00109918	0.00033489	0.000681023	0.00113222	0.00034054	0.00084406	0.000560375	0.0007193
NM_026689	333	134	305	95	154	172	106	212	39	91	112		1000	1164	651	842	914.25	560	913	237	633	585.75						0.0239414	0.0323539	0.0128101	0.0217976	0.0227258	0.0109087	0.00709362	0.00779844	0.00631857	0.00802984		0.00144746	0.00147483	0.00136298	0.00109719	0.00134561	0.000630891	0.000719705	0.000545074	0.000675653	0.000642831
NM_008378	299	43	177	95	124	109.75	148	440	95	194	219.25		208	507	182	499	349	472	904	165	803	586						0.00768269	0.0187759	0.0128101	0.0175513	0.014205	0.015231	0.0147226	0.0189962	0.0134704	0.0156051		0.000301072	0.000642385	0.000381049	0.000650233	0.000493685	0.000531751	0.000712611	0.000379482	0.000857107	0.000620238
NM_001102407	155	119	298	218	209	211	265	530	130	330	313.75		579	722	324	446	517.75	568	842	404	531	586.25						0.0212614	0.0316113	0.0293959	0.0295824	0.0279628	0.0272718	0.0177341	0.0259948	0.0229135	0.0234785		0.00083808	0.000914797	0.000678351	0.00058117	0.0007531	0.000639904	0.000663737	0.000929156	0.00056678	0.000699894
NM_001109750	527	101	214	107	122	136	183	370	90	116	189.75		388	520	340	579	456.75	708	663	278	702	587.75						0.0180454	0.0227008	0.0144283	0.0172682	0.0181107	0.018833	0.0123804	0.0179964	0.00805444	0.014316		0.000561615	0.000658857	0.00071185	0.000754479	0.0006717	0.000797627	0.000522634	0.00063937	0.000749302	0.000677233
NM_010048	530	103	212	109	121	136.25	185	374	92	116	191.75		394	534	344	557	457.25	699	675	283	701	589.5						0.0184027	0.0224886	0.014698	0.0171267	0.018179	0.0190388	0.0125142	0.0183963	0.00805444	0.0145009		0.0005703	0.000676595	0.000720224	0.000725811	0.000673233	0.000787488	0.000532093	0.000650869	0.000748235	0.000679671
NM_008695	1384	285	171	189	182	206.75	599	312	101	191	300.75		827	460	237	640	541	959	551	206	642	589.5						0.0509201	0.0181394	0.0254854	0.0257608	0.0300764	0.0616445	0.0104397	0.020196	0.013262	0.0263856		0.00119705	0.000582835	0.000496201	0.000833966	0.000777513	0.0010804	0.000434346	0.000473778	0.000685259	0.000668446
NM_198296	670	74	123	128	107	108	221	354	84	152	202.75		294	507	215	658	418.5	510	799	158	894	590.25						0.0132214	0.0130476	0.01726	0.0151451	0.0146685	0.0227436	0.011845	0.0167966	0.0105541	0.0154848		0.000425553	0.000642385	0.00045014	0.000857422	0.000593875	0.000574562	0.000629841	0.000363383	0.000954239	0.000630506
NM_008391	330	287	447	275	469	369.5	630	1404	176	670	720		212	517	98	622	362.25	511	849	72	930	590.5						0.0512775	0.047417	0.037082	0.0663836	0.05054	0.0648348	0.0469785	0.035193	0.0465213	0.0483819		0.000306862	0.000655056	0.00020518	0.000810511	0.000494402	0.000575688	0.000669255	0.000165592	0.000992665	0.0006008
NM_001164717	1077	74	239	61	62	109	68	111	26	54	64.75		630	1289	361	752	758	566	756	129	915	591.5						0.0132214	0.0253527	0.00822546	0.00877565	0.0138938	0.00699804	0.00371411	0.00519896	0.00374948	0.00491515		0.0009119	0.0016332	0.000755817	0.000979911	0.00107021	0.000637651	0.000595944	0.000296686	0.000976654	0.000626734
NM_029634	429	91	137	93	96	104.25	168	240	68	116	148		632	484	447	543	526.5	771	599	393	605	592						0.0162587	0.0145327	0.0125405	0.0135881	0.01423	0.0172893	0.00803052	0.0135973	0.00805444	0.0117429		0.000914795	0.000613244	0.000935873	0.000707568	0.00079287	0.000868602	0.000472183	0.000903858	0.000645766	0.000722602
NM_027213	176	90	187	110	122	127.25	183	341	77	161	190.5		511	484	498	453	486.5	677	780	445	486	597						0.01608	0.0198366	0.0148328	0.0172682	0.0170044	0.018833	0.01141	0.0153969	0.011179	0.0142047		0.000739652	0.000613244	0.00104265	0.000590292	0.00074646	0.000762703	0.000614863	0.00102345	0.000518747	0.000729941
NM_009974	331	206	422	257	224	277.25	326	559	147	288	330		409	729	233	879	562.5	608	846	206	729	597.25						0.0368054	0.044765	0.0346548	0.0317056	0.0369827	0.0335494	0.0187044	0.0293941	0.0199972	0.0254113		0.000592011	0.000923666	0.000487826	0.0011454	0.000787226	0.000684968	0.00066689	0.000473778	0.000778121	0.000650939
NM_010479	622	328	1922	756	371	844.25	144	983	164	236	381.75		1366	3218	2169	1155	1977	391	939	417	642	597.25						0.0586028	0.203882	0.101942	0.0525124	0.104235	0.0148194	0.0328917	0.0327934	0.0163866	0.0242228		0.00197723	0.00407731	0.00454118	0.00150505	0.00302519	0.000440497	0.000740201	0.000959055	0.000685259	0.000706253
NM_024177	361	95	182	75	117	117.25	158	336	65	146	176.25		227	673	260	471	407.75	477	936	268	709	597.5						0.0169734	0.0193062	0.0101133	0.0165605	0.0157384	0.0162602	0.0112427	0.0129974	0.0101375	0.0126594		0.000328574	0.000852713	0.000544356	0.000613747	0.000584847	0.000537384	0.000737836	0.000616371	0.000756774	0.000662091
NM_175397	426	151	125	176	274	181.5	432	515	111	354	353		502	318	309	329	364.5	676	583	301	832	598						0.0269787	0.0132598	0.0237325	0.0387827	0.0256884	0.0444582	0.0172321	0.0221956	0.0245799	0.0271164		0.000726625	0.000402916	0.000646946	0.000428711	0.0005513	0.000761576	0.000459571	0.000692268	0.000888062	0.000700369
NM_030194	426	151	125	176	274	181.5	432	515	111	354	353		502	318	309	329	364.5	676	583	301	832	598						0.0269787	0.0132598	0.0237325	0.0387827	0.0256884	0.0444582	0.0172321	0.0221956	0.0245799	0.0271164		0.000726625	0.000402916	0.000646946	0.000428711	0.0005513	0.000761576	0.000459571	0.000692268	0.000888062	0.000700369
NM_009856	177	6884	18415	4609	3476	8346	177	662	82	179	275		26527	57789	19407	20593	31079	540	1156	291	405	598						1.22994	1.95343	0.621494	0.492003	1.07422	0.0182155	0.0221508	0.0163967	0.0124288	0.017298		0.0383968	0.0732205	0.040632	0.0268342	0.0447709	0.00060836	0.000911259	0.000669269	0.00043229	0.000655294
NM_001114328	734	93	118	158	78	111.75	235	266	91	139	182.75		366	580	252	411	402.25	825	656	239	674	598.5						0.016616	0.0125172	0.0213053	0.0110403	0.0153697	0.0241844	0.00890049	0.0181964	0.00965144	0.0152332		0.000529771	0.000734879	0.000527606	0.000535563	0.000581955	0.000929438	0.000517116	0.000549674	0.000719415	0.000678911
NM_013469	484	362	891	379	597	557.25	951	2277	366	906	1125		300	561	198	753	453	585	641	208	962	599						0.0646775	0.0945158	0.0511057	0.0845011	0.0737	0.0978697	0.0761895	0.0731854	0.0629079	0.0775381		0.000434238	0.000710805	0.000414548	0.000981214	0.000635201	0.000659056	0.000505291	0.000478378	0.00102682	0.000667387
NM_018864	258	123	216	226	222	196.75	436	713	190	314	413.25		276	422	263	562	380.75	535	920	173	769	599.25						0.0219761	0.0229129	0.0304746	0.0314225	0.0266965	0.0448698	0.0238573	0.0379924	0.0218025	0.0321305		0.000399499	0.000534688	0.000550637	0.000732327	0.000554288	0.000602727	0.000725223	0.000397881	0.000820817	0.000636662
NM_199035	507	152	327	230	345	263.5	395	909	177	452	483.25		332	700	238	844	528.5	460	725	219	993	599.25						0.0271574	0.0346876	0.031014	0.0488323	0.0354228	0.0406504	0.0304156	0.0353929	0.0313845	0.0344609		0.000480557	0.000886922	0.000498295	0.00109979	0.000741392	0.000518232	0.000571507	0.000503676	0.00105991	0.000663331
NM_007455	772	62	119	97	166	111	260	490	103	253	276.5		217	349	247	448	315.25	793	568	236	804	600.25						0.0110774	0.0126233	0.0130798	0.0234961	0.0150692	0.0267572	0.0163956	0.0205959	0.017567	0.0203289		0.000314099	0.000442194	0.000517138	0.000583776	0.000464302	0.000893387	0.000447746	0.000542775	0.000858175	0.000685521
NM_013706	55	1090	2277	807	1758	1483	1801	3880	520	2199	2100		732	313	678	422	536.25	1006	552	517	326	600.25						0.194747	0.24154	0.108819	0.248832	0.198485	0.185345	0.129827	0.103979	0.152687	0.14296		0.00105954	0.000396581	0.00141951	0.000549897	0.000856383	0.00113335	0.000435134	0.00118904	0.000347966	0.000776374
NM_025387	95	174	373	162	289	249.5	408	1136	209	405	539.5		346	378	295	483	375.5	482	766	359	800	601.75						0.0310881	0.0395672	0.0218447	0.0409059	0.0333515	0.0419883	0.0380111	0.0417916	0.0281211	0.037478		0.000500821	0.000478938	0.000617634	0.000629384	0.000556694	0.000543017	0.000603827	0.000825661	0.000853905	0.000706603
NM_025348	65	134	277	86	283	195	384	857	82	362	421.25		369	210	534	244	339.25	893	686	465	364	602						0.0239414	0.0293837	0.0115965	0.0400566	0.0262446	0.0395184	0.0286756	0.0163967	0.0251354	0.0274315		0.000534113	0.000266077	0.00111802	0.00031795	0.000559041	0.00100605	0.000540764	0.00106945	0.000388527	0.000751197
NM_013753	840	76	172	79	82	102.25	311	236	47	146	185		295	570	292	579	434	740	488	151	1030	602.25						0.0135787	0.0182455	0.0106526	0.0116065	0.0135208	0.0320058	0.00789667	0.00939812	0.0101375	0.0148595		0.000427001	0.000722208	0.000611353	0.000754479	0.00062876	0.000833678	0.000384684	0.000347284	0.0010994	0.000666262
NM_026238	457	92	160	104	157	128.25	223	568	106	216	278.25		303	509	348	681	460.25	451	752	321	885	602.25						0.0164374	0.0169725	0.0140237	0.0222222	0.017414	0.0229495	0.0190056	0.0211958	0.0149979	0.0195372		0.000438581	0.000644919	0.000728599	0.000887392	0.000674873	0.000508093	0.000592791	0.000738265	0.000944633	0.000695946
NM_139229	621	95	181	126	202	151	343	649	122	272	346.5		378	450	175	677	420	515	788	282	825	602.5						0.0169734	0.0192002	0.0169903	0.0285916	0.0204389	0.035299	0.0217159	0.0243951	0.0188863	0.0250741		0.00054714	0.000570164	0.000366393	0.00088218	0.000591469	0.000580195	0.000621169	0.00064857	0.00088059	0.000682631
NM_010949	585	86	280	116	172	163.5	225	536	85	237	270.75		146	572	140	572	357.5	380	978	120	934	603						0.0153654	0.0297019	0.0156419	0.0243454	0.0212636	0.0231553	0.0179348	0.0169966	0.016456	0.0186357		0.000211329	0.000724742	0.000293115	0.000745357	0.000493636	0.000428105	0.000770944	0.000275987	0.000996934	0.000617993
NM_023514	371	87	161	108	89	111.25	171	366	95	171	200.75		424	448	503	431	451.5	617	729	383	684	603.25						0.015544	0.0170786	0.0145631	0.0125973	0.0149458	0.017598	0.0122465	0.0189962	0.0118734	0.0151785		0.000613723	0.00056763	0.00105312	0.000561624	0.000699024	0.000695107	0.000574661	0.000880859	0.000730089	0.000720179
NM_001037810	376	126	70	293	80	142.25	206	184	180	117	171.75		608	197	979	315	524.75	755	496	706	456	603.25						0.0225121	0.00742548	0.0395092	0.0113234	0.0201925	0.0212	0.00615673	0.0359928	0.00812387	0.0178683		0.000880056	0.000249605	0.00204971	0.000410468	0.000897459	0.000850577	0.00039099	0.00162372	0.000486726	0.000838004
NM_007465	593	112	161	83	58	103.5	69	135	56	77	84.25		1271	1044	375	910	900	695	735	277	706	603.25						0.0200107	0.0170786	0.011192	0.00820948	0.0141227	0.00710096	0.00451717	0.0111978	0.00534648	0.00704059		0.00183972	0.00132278	0.000785128	0.0011858	0.00128336	0.000782981	0.00057939	0.00063707	0.000753571	0.000688253
NM_008997	199	245	493	283	365	346.5	519	1028	223	442	553		338	392	249	509	372	568	719	261	866	603.5						0.0437735	0.0522966	0.0381607	0.0516631	0.0464735	0.0534115	0.0343974	0.0445911	0.0306902	0.0407725		0.000489242	0.000496677	0.000521325	0.000663264	0.000542627	0.000639904	0.000566778	0.000600272	0.000924353	0.000682827
NM_001177710	342	96	159	89	127	117.75	283	388	88	166	231.25		420	356	437	410	405.75	680	770	315	651	604						0.017152	0.0168664	0.0120011	0.0179759	0.0159989	0.0291242	0.0129827	0.0175965	0.0115262	0.0178074		0.000607934	0.000451063	0.000914936	0.00053426	0.000627048	0.000766082	0.00060698	0.000724466	0.000694865	0.000698099
NM_021565	489	114	295	100	180	172.25	284	661	82	256	320.75		210	646	136	572	391	668	642	95	1012	604.25						0.0203681	0.0312931	0.0134844	0.0254777	0.0226558	0.0292271	0.0221174	0.0163967	0.0177753	0.0213791		0.000303967	0.000818503	0.00028474	0.000745357	0.000538142	0.000752563	0.00050608	0.00021849	0.00108019	0.000639331
NM_028836	293	156	343	302	177	244.5	289	656	185	187	329.25		484	894	536	713	656.75	690	603	441	683	604.25						0.0278721	0.0363849	0.0407228	0.0250531	0.0325082	0.0297417	0.0219501	0.0369926	0.0129843	0.0254172		0.000700571	0.00113273	0.00112221	0.000929091	0.00097115	0.000777348	0.000475336	0.00101425	0.000729022	0.00074899
NM_001136075	634	87	279	122	173	165.25	222	539	87	243	272.75		145	587	140	571	360.75	383	991	124	920	604.5						0.015544	0.0295958	0.0164509	0.0244869	0.0215194	0.0228466	0.0180352	0.0173965	0.0168727	0.0187877		0.000209882	0.000743748	0.000293115	0.000744054	0.0004977	0.000431485	0.000781191	0.000285187	0.000981991	0.000619963
NM_029626	352	105	98	115	99	104.25	228	375	103	155	215.25		232	566	271	675	436	467	917	238	797	604.75						0.0187601	0.0103957	0.015507	0.0140127	0.0146689	0.023464	0.0125477	0.0205959	0.0107624	0.0168425		0.000335811	0.00071714	0.000567386	0.000879574	0.000624978	0.000526118	0.000722858	0.000547374	0.000850703	0.000661764
NM_001165930	352	105	98	115	99	104.25	228	375	103	155	215.25		232	566	271	675	436	467	917	238	797	604.75						0.0187601	0.0103957	0.015507	0.0140127	0.0146689	0.023464	0.0125477	0.0205959	0.0107624	0.0168425		0.000335811	0.00071714	0.000567386	0.000879574	0.000624978	0.000526118	0.000722858	0.000547374	0.000850703	0.000661764
NM_008018	1105	76	247	66	63	113	73	112	26	56	66.75		649	1348	373	769	784.75	580	771	130	938	604.75						0.0135787	0.0262013	0.00889968	0.0089172	0.0143992	0.00751261	0.00374757	0.00519896	0.00388835	0.00508687		0.000939402	0.00170796	0.000780941	0.00100206	0.00110759	0.000653423	0.000607769	0.000298986	0.0010012	0.000640345
NM_027360	39	136	651	224	339	337.5	299	1112	132	448	497.75		214	825	279	750	517	375	1132	220	696	605.75						0.0242987	0.069057	0.030205	0.047983	0.0428859	0.0307708	0.0372081	0.0263947	0.0311068	0.0313701		0.000309757	0.0010453	0.000584135	0.000977304	0.000729124	0.000422472	0.00089234	0.000505976	0.000742898	0.000640921
NM_001113464	611	91	191	52	88	105.5	140	225	29	169	140.75		512	1029	214	920	668.75	537	796	79	1015	606.75						0.0162587	0.020261	0.00701187	0.0124558	0.0139968	0.0144077	0.00752861	0.00579884	0.0117345	0.00986742		0.0007411	0.00130378	0.000448046	0.00119883	0.000922937	0.00060498	0.000627476	0.000181691	0.00108339	0.000624385
NM_001113460	611	91	191	52	88	105.5	140	225	29	169	140.75		512	1029	214	920	668.75	537	796	79	1015	606.75						0.0162587	0.020261	0.00701187	0.0124558	0.0139968	0.0144077	0.00752861	0.00579884	0.0117345	0.00986742		0.0007411	0.00130378	0.000448046	0.00119883	0.000922937	0.00060498	0.000627476	0.000181691	0.00108339	0.000624385
NM_025826	413	109	182	143	154	147	228	469	145	195	259.25		289	478	154	499	355	485	960	209	774	607						0.0194747	0.0193062	0.0192826	0.0217976	0.0199653	0.023464	0.015693	0.0289942	0.0135398	0.0204227		0.000418316	0.000605641	0.000322426	0.000650233	0.000499154	0.000546397	0.000756755	0.000480677	0.000826153	0.000652496
NM_001039175	183	570	751	545	674	635	843	1288	353	755	809.75		308	610	399	678	498.75	515	954	287	672	607						0.10184	0.0796648	0.0734898	0.0953999	0.0875987	0.0867552	0.0430971	0.0705859	0.0524233	0.0632154		0.000445818	0.00077289	0.000835376	0.000883483	0.000734392	0.000580195	0.000752025	0.000660069	0.00071728	0.000677392
NM_008453	325	83	489	185	131	222	111	222	108	112	138.25		456	1741	201	755	788.25	338	987	229	874	607						0.0148294	0.0518723	0.0249461	0.0185421	0.0275475	0.0114233	0.00742823	0.0215957	0.0077767	0.012056		0.000660042	0.0022059	0.000420829	0.00098382	0.00106765	0.000380788	0.000778038	0.000526675	0.000932892	0.000654598
NM_183142	431	85	114	115	101	103.75	149	324	112	150	183.75		293	558	198	596	411.25	471	880	333	746	607.5						0.0151867	0.0120929	0.015507	0.0142958	0.0142706	0.015334	0.0108412	0.0223955	0.0104152	0.0147465		0.000424106	0.000707004	0.000414548	0.000776631	0.000580572	0.000530625	0.000693692	0.000765864	0.000796267	0.000696612
NM_016686	499	165	516	183	155	254.75	151	232	72	111	141.5		440	1927	201	953	880.25	322	1012	189	907	607.5						0.0294801	0.0547364	0.0246764	0.0219391	0.032708	0.0155398	0.00776283	0.0143971	0.00770726	0.0113517		0.000636883	0.00244157	0.000420829	0.00124183	0.00118528	0.000362763	0.000797746	0.00043468	0.000968115	0.000640826
NM_178923	1190	92	170	133	146	135.25	264	390	101	154	227.25		232	591	176	684	420.75	560	572	134	1168	608.5						0.0164374	0.0180333	0.0179342	0.0206653	0.0182675	0.0271689	0.0130496	0.020196	0.010693	0.0177768		0.000335811	0.000748816	0.000368487	0.000891302	0.000586104	0.000630891	0.0004509	0.000308186	0.0012467	0.00065917
NM_001042411	541	92	165	98	99	113.5	183	305	90	98	169		535	497	471	534	509.25	701	785	384	564	608.5						0.0164374	0.0175029	0.0132147	0.0140127	0.0152919	0.018833	0.0102054	0.0179964	0.00680461	0.0134599		0.000774392	0.000629715	0.000986121	0.000695841	0.000771517	0.000789741	0.000618805	0.000883159	0.000602003	0.000723427
NM_001163155	1668	32	397	53	78	140	54	832	43	110	259.75		266	1348	398	708	680	258	1482	168	526	608.5						0.00571735	0.0421131	0.00714671	0.0110403	0.0165044	0.00555727	0.0278391	0.00859828	0.00763783	0.0124081		0.000385025	0.00170796	0.000833283	0.000922575	0.00096221	0.000290661	0.00116824	0.000386382	0.000561443	0.000601681
NM_007736	1668	32	397	53	78	140	54	832	43	110	259.75		266	1348	398	708	680	258	1482	168	526	608.5						0.00571735	0.0421131	0.00714671	0.0110403	0.0165044	0.00555727	0.0278391	0.00859828	0.00763783	0.0124081		0.000385025	0.00170796	0.000833283	0.000922575	0.00096221	0.000290661	0.00116824	0.000386382	0.000561443	0.000601681
NM_001017429	44	55	243	36	101	108.75	61	366	26	116	142.25		356	659	309	589	478.25	819	603	400	614	609						0.00982669	0.025777	0.00485437	0.0142958	0.0136885	0.00627766	0.0122465	0.00519896	0.00805444	0.0079444		0.000515296	0.000834974	0.000646946	0.00076751	0.000691181	0.000922679	0.000475336	0.000919957	0.000655372	0.000743336
NM_025922	179	121	258	115	166	165	364	540	84	239	306.75		349	723	311	674	514.25	694	815	256	671	609						0.0216187	0.0273682	0.015507	0.0234961	0.0219975	0.0374601	0.0180687	0.0167966	0.0165949	0.0222301		0.000505164	0.000916064	0.000651133	0.000878271	0.000737658	0.000781855	0.000642453	0.000588772	0.000716213	0.000682323
NM_172618	593	159	275	202	149	196.25	132	358	75	155	180		856	1256	676	1019	951.75	584	673	231	952	610						0.0284081	0.0291715	0.0272384	0.0210899	0.026477	0.0135844	0.0119789	0.014997	0.0107624	0.0128307		0.00123903	0.00159139	0.00141532	0.00132783	0.00139339	0.00065793	0.000530517	0.000531275	0.00101615	0.000683967
NM_012058	67	67	208	49	121	111.25	27	136	11	105	69.75		177	654	255	488	393.5	314	1066	140	921	610.25						0.0119707	0.0220643	0.00660734	0.0171267	0.0144422	0.00277864	0.00455063	0.00219956	0.00729065	0.00420487		0.000256201	0.000828639	0.000533887	0.000635899	0.000563657	0.00035375	0.000840313	0.000321985	0.000983059	0.000624777
NM_178371	530	227	301	196	191	228.75	211	317	94	176	199.5		970	888	649	890	849.25	564	731	308	839	610.5						0.0405574	0.0319296	0.0264293	0.0270347	0.0314878	0.0217145	0.010607	0.0187962	0.0122205	0.0158346		0.00140404	0.00112512	0.0013588	0.00115973	0.00126192	0.000635398	0.000576237	0.000708367	0.000895533	0.000703884
NM_025456	262	112	224	195	132	165.75	269	365	126	165	231.25		342	588	370	458	439.5	603	866	228	751	612						0.0200107	0.0237615	0.0262945	0.0186837	0.0221876	0.0276834	0.0122131	0.025195	0.0114567	0.0191371		0.000495032	0.000745015	0.00077466	0.000596807	0.000652878	0.000679335	0.000682656	0.000524375	0.000801604	0.000671992
NM_206534	93	84	220	84	127	128.75	154	443	62	181	210		313	393	359	398	365.75	543	906	371	629	612.25						0.015008	0.0233372	0.0113269	0.0179759	0.016912	0.0158485	0.014823	0.0123975	0.0125677	0.0139092		0.000453055	0.000497944	0.000751629	0.000518623	0.000555313	0.000611739	0.000714187	0.00085326	0.000671383	0.000712642
NM_172766	1277	66	132	74	147	104.75	178	287	63	188	179		398	584	214	590	446.5	573	729	223	925	612.5						0.011792	0.0140023	0.00997843	0.0208068	0.0141449	0.0183184	0.00960316	0.0125975	0.0130537	0.0133932		0.000576089	0.000739947	0.000448046	0.000768813	0.000633224	0.000645537	0.000574661	0.000512876	0.000987328	0.0006801
NM_027060	593	159	275	202	149	196.25	132	358	75	155	180		856	1254	682	1024	954	590	673	231	956	612.5						0.0284081	0.0291715	0.0272384	0.0210899	0.026477	0.0135844	0.0119789	0.014997	0.0107624	0.0128307		0.00123903	0.00158886	0.00142789	0.00133435	0.00139753	0.000664689	0.000530517	0.000531275	0.00102042	0.000686724
NM_001037941	242	321	867	392	290	467.5	352	555	229	283	354.75		1303	893	602	468	816.5	781	529	600	541	612.75						0.0573522	0.0919699	0.0528587	0.0410474	0.060807	0.0362252	0.0185706	0.0457908	0.01965	0.0300592		0.00188604	0.00113146	0.00126039	0.000609838	0.00122193	0.000879868	0.000417003	0.00137994	0.000577453	0.000813565
NM_016852	242	225	694	225	377	380.25	407	970	198	535	527.5		282	782	147	679	472.5	389	956	160	951	614						0.0402001	0.0736183	0.0303398	0.0533616	0.04938	0.0418854	0.0324567	0.0395921	0.0371476	0.0377704		0.000408184	0.000990819	0.00030777	0.000884786	0.00064789	0.000438244	0.000753601	0.000367983	0.00101508	0.000643727
NM_175335	320	199	394	357	258	302	377	764	251	280	418		256	703	120	588	416.75	591	884	113	870	614.5						0.0355548	0.0417948	0.0481392	0.036518	0.0405017	0.038798	0.0255638	0.05019	0.0194417	0.0334984		0.00037055	0.000890724	0.000251241	0.000766207	0.00056968	0.000665816	0.000696845	0.000259888	0.000928622	0.000637793
NM_029248	303	103	205	92	86	121.5	98	197	58	93	111.5		1135	1120	472	909	909	720	758	230	752	615						0.0184027	0.021746	0.0124056	0.0121727	0.0161818	0.0100854	0.00659172	0.0115977	0.00645744	0.00868306		0.00164287	0.00141908	0.000988215	0.00118449	0.00130866	0.000811146	0.000597521	0.000528975	0.000802671	0.000685078
NM_172482	716	140	262	140	110	163	67	144	62	51	81		2389	2000	1037	1675	1775.25	759	845	404	452	615						0.0250134	0.0277925	0.0188781	0.0155697	0.0218134	0.00689513	0.00481831	0.0123975	0.00354117	0.00691303		0.00345798	0.00253406	0.00217114	0.00218265	0.00258646	0.000855083	0.000666102	0.000929156	0.000482457	0.000733199
NM_009763	292	99	89	155	87	107.5	177	253	174	110	178.5		375	300	714	345	433.5	651	494	911	405	615.25						0.017688	0.00944097	0.0209008	0.0123142	0.015086	0.0182155	0.0084655	0.034793	0.00763783	0.017278		0.000542798	0.00038011	0.00149488	0.00044956	0.000716838	0.000733411	0.000389413	0.0020952	0.00043229	0.000912579
NM_023587	235	786	1155	637	389	741.75	462	787	150	349	437		1461	1394	579	663	1024.25	732	756	218	755	615.25						0.140432	0.12252	0.0858954	0.0550602	0.100977	0.0475455	0.0263334	0.029994	0.0242327	0.0320264		0.00211474	0.00176624	0.00121224	0.000863937	0.00148929	0.000824665	0.000595944	0.000501376	0.000805873	0.000681965
NM_008866	211	137	275	148	219	194.75	257	802	102	334	373.75		368	663	230	673	483.5	499	954	181	830	616						0.0244774	0.0291715	0.0199569	0.0309979	0.0261509	0.0264485	0.0268353	0.0203959	0.0231912	0.0242177		0.000532666	0.000840042	0.000481545	0.000876968	0.000682805	0.000562169	0.000752025	0.00041628	0.000885927	0.0006541
NM_133939	77	62	200	54	85	100.25	94	284	38	100	129		716	497	538	279	507.5	935	567	559	405	616.5						0.0110774	0.0212157	0.00728155	0.0120311	0.0129014	0.00967377	0.00950278	0.00759848	0.00694348	0.00842963		0.00103638	0.000629715	0.0011264	0.000363557	0.000789013	0.00105336	0.000446958	0.00128564	0.00043229	0.000804563
NM_020006	330	128	514	74	97	203.25	127	270	50	74	130.25		873	2537	667	1391	1367	621	859	334	653	616.75						0.0228694	0.0545242	0.00997843	0.0137297	0.0252754	0.0130699	0.00903433	0.009998	0.00513818	0.0093101		0.00126363	0.00321446	0.00139648	0.00181257	0.00192179	0.000699613	0.000677138	0.000768164	0.000697	0.000710479
NM_001163346	330	128	514	74	97	203.25	127	270	50	74	130.25		873	2537	667	1391	1367	621	859	334	653	616.75						0.0228694	0.0545242	0.00997843	0.0137297	0.0252754	0.0130699	0.00903433	0.009998	0.00513818	0.0093101		0.00126363	0.00321446	0.00139648	0.00181257	0.00192179	0.000699613	0.000677138	0.000768164	0.000697	0.000710479
NM_001037987	461	118	483	193	84	219.5	210	765	134	108	304.25		350	1028	271	269	479.5	403	1422	222	423	617.5						0.0210827	0.0512358	0.0260248	0.0118896	0.0275582	0.0216116	0.0255973	0.0267946	0.00749896	0.0203756		0.000506611	0.00130251	0.000567386	0.000350527	0.000681758	0.000454016	0.00112094	0.000510576	0.000451502	0.000634259
NM_010103	451	116	481	192	85	218.5	207	756	130	106	299.75		326	1048	279	276	482.25	399	1419	229	423	617.5						0.0207254	0.0510237	0.02589	0.0120311	0.0274175	0.0213029	0.0252961	0.0259948	0.00736009	0.0199885		0.000471872	0.00132785	0.000584135	0.000359648	0.000685876	0.00044951	0.00111858	0.000526675	0.000451502	0.000636566
NM_009185	1243	384	207	159	115	216.25	152	202	81	75	127.5		2581	1595	663	1794	1658.25	651	761	238	824	618.5						0.0686082	0.0219582	0.0214401	0.0162774	0.032071	0.0156427	0.00675902	0.0161968	0.00520761	0.0109515		0.0037359	0.00202092	0.00138811	0.00233771	0.00237066	0.000733411	0.000599886	0.000547374	0.000879522	0.000690048
NM_019440	376	248	208	309	418	295.75	291	473	153	336	313.25		561	547	328	1784	805	417	898	216	944	618.75						0.0443095	0.0220643	0.0416667	0.0591649	0.0418013	0.0299475	0.0158268	0.0305939	0.0233301	0.0249246		0.000812026	0.000693067	0.000686725	0.00232468	0.00112912	0.000469789	0.000707881	0.000496777	0.00100761	0.000670514
NM_027261	271	103	206	92	86	121.75	98	197	58	93	111.5		1145	1133	470	905	913.25	737	758	226	759	620						0.0184027	0.0218521	0.0124056	0.0121727	0.0162083	0.0100854	0.00659172	0.0115977	0.00645744	0.00868306		0.00165734	0.00143555	0.000984027	0.00117928	0.00131405	0.000830298	0.000597521	0.000519776	0.000810143	0.000689434
NM_194341	1119	90	193	92	111	121.5	226	493	68	181	242		320	616	91	824	462.75	719	617	204	942	620.5						0.01608	0.0204731	0.0124056	0.0157113	0.0161675	0.0232582	0.016496	0.0135973	0.0125677	0.0164798		0.000463187	0.000780492	0.000190524	0.00107373	0.000626984	0.000810019	0.000486373	0.000469178	0.00100547	0.000692761
NM_021476	333	187	167	185	193	183	442	522	143	293	350		390	631	198	810	507.25	534	1069	216	673	623						0.0334108	0.0177151	0.0249461	0.0273178	0.0258474	0.0454873	0.0174664	0.0285943	0.0203444	0.0279731		0.00056451	0.000799497	0.000414548	0.00105549	0.000708511	0.0006016	0.000842678	0.000496777	0.000718348	0.000664851
NM_001005523	170	77	313	113	86	147.25	113	174	74	88	112.25		1068	1144	313	567	773	692	810	203	791	624						0.0137574	0.0332025	0.0152373	0.0121727	0.0185925	0.0116291	0.00582212	0.014797	0.00611026	0.00958963		0.00154589	0.00144948	0.00065532	0.000738842	0.00109738	0.000779601	0.000638512	0.000466878	0.000844299	0.000682323
NM_010913	299	334	618	396	315	415.75	653	940	258	372	555.75		359	690	141	608	449.5	454	967	158	918	624.25						0.0596748	0.0655564	0.0533981	0.044586	0.0558038	0.0672018	0.0314529	0.0515897	0.0258297	0.0440185		0.000519638	0.000874252	0.000295208	0.000792268	0.000620342	0.000511473	0.000762273	0.000363383	0.000979856	0.000654246
NM_173755	1269	65	169	100	123	114.25	131	371	87	136	181.25		314	703	274	609	475	556	793	292	856	624.25						0.0116134	0.0179272	0.0134844	0.0174098	0.0151087	0.0134815	0.0124138	0.0173965	0.00944313	0.0131838		0.000454503	0.000890724	0.000573667	0.000793571	0.000678116	0.000626385	0.000625111	0.000671569	0.000913679	0.000709186
NM_027318	134	34	191	35	173	108.25	104	522	62	177	216.25		321	456	401	433	402.75	688	868	335	607	624.5						0.00607468	0.020261	0.00471953	0.0244869	0.0138855	0.0107029	0.0174664	0.0123975	0.01229	0.0132142		0.000464635	0.000577767	0.000839564	0.00056423	0.000611549	0.000775095	0.000684232	0.000770464	0.000647901	0.000719423
NM_133349	152	158	296	183	74	177.75	88	161	45	88	95.5		520	1468	432	713	783.25	361	1084	206	848	624.75						0.0282294	0.0313992	0.0246764	0.0104742	0.0236948	0.00905629	0.00538714	0.0089982	0.00611026	0.00738797		0.00075268	0.00186	0.000904468	0.000929091	0.00111156	0.0004067	0.000854502	0.000473778	0.00090514	0.00066003
NM_001159908	152	158	296	183	74	177.75	88	161	45	88	95.5		520	1468	432	713	783.25	361	1084	206	848	624.75						0.0282294	0.0313992	0.0246764	0.0104742	0.0236948	0.00905629	0.00538714	0.0089982	0.00611026	0.00738797		0.00075268	0.00186	0.000904468	0.000929091	0.00111156	0.0004067	0.000854502	0.000473778	0.00090514	0.00066003
NM_001110832	328	340	642	402	327	427.75	656	957	260	379	563		367	690	141	611	452.25	447	967	160	931	626.25						0.0607468	0.0681023	0.0542071	0.0462845	0.0573352	0.0675105	0.0320217	0.0519896	0.0263158	0.0444594		0.000531218	0.000874252	0.000295208	0.000796177	0.000624214	0.000503587	0.000762273	0.000367983	0.000993732	0.000656894
NM_008681	375	263	392	209	236	275	162	524	161	118	241.25		926	729	414	779	712	421	1213	394	477	626.25						0.0469895	0.0415827	0.0281823	0.0334041	0.0375396	0.0166718	0.0175333	0.0321936	0.00819331	0.018648		0.00134035	0.000923666	0.000866782	0.00101509	0.00103647	0.000474295	0.000956191	0.000906158	0.000509141	0.000711446
NM_011404	493	55	103	163	112	108.25	154	331	152	129	191.5		243	656	352	743	498.5	378	909	285	935	626.75						0.00982669	0.0109261	0.0219795	0.0158528	0.0146463	0.0158485	0.0110754	0.0303939	0.00895709	0.0165687		0.000351733	0.000831173	0.000736974	0.000968183	0.000722016	0.000425852	0.000716552	0.000655469	0.000998002	0.000698969
NM_175645	934	102	566	198	164	257.5	182	495	61	184	230.5		245	1112	177	504	509.5	406	1052	79	972	627.25						0.018224	0.0600403	0.026699	0.023213	0.0320441	0.0187301	0.0165629	0.0121976	0.012776	0.0150666		0.000354628	0.00140894	0.000370581	0.000656749	0.000697724	0.000457396	0.000829277	0.000181691	0.00103749	0.000626465
NM_001195083	304	91	175	88	76	107.5	139	130	54	60	95.75		488	653	323	644	527	658	805	214	835	628						0.0162587	0.0185637	0.0118662	0.0107573	0.0143615	0.0143048	0.00434986	0.0107978	0.00416609	0.00840465		0.000706361	0.000827372	0.000676257	0.000839179	0.000762292	0.000741297	0.00063457	0.000492177	0.000891264	0.000689827
NM_021511	346	158	409	224	209	250	171	511	99	249	257.5		558	839	429	754	645	464	767	280	1002	628.25						0.0282294	0.043386	0.030205	0.0295824	0.0328507	0.017598	0.0170983	0.019796	0.0172893	0.0179454		0.000807683	0.00106304	0.000898187	0.000982517	0.000937857	0.000522739	0.000604615	0.00064397	0.00106952	0.00071021
NM_001253863	517	58	201	87	86	108	179	399	59	115	188		354	652	223	602	457.75	617	929	123	846	628.75						0.0103627	0.0213217	0.0117314	0.0121727	0.0138971	0.0184213	0.0133507	0.0117976	0.007985	0.0128887		0.000512401	0.000826105	0.00046689	0.00078445	0.000647461	0.000695107	0.000732318	0.000282887	0.000903005	0.000653329
NM_007898	211	209	224	175	287	223.75	444	582	124	365	378.75		447	510	318	641	479	690	712	284	830	629						0.0373414	0.0237615	0.0235976	0.0406228	0.0313308	0.0456931	0.019474	0.024795	0.0253437	0.0288265		0.000647015	0.000646186	0.000665789	0.000835269	0.000698565	0.000777348	0.00056126	0.000653169	0.000885927	0.000719426
NM_178708	380	127	185	91	237	160	345	677	163	299	371		245	429	278	567	379.75	521	850	333	816	630						0.0226907	0.0196245	0.0122708	0.0335456	0.0220329	0.0355048	0.0226527	0.0325935	0.020761	0.027878		0.000354628	0.000543557	0.000582042	0.000738842	0.000554767	0.000586954	0.000670043	0.000765864	0.000870983	0.000723461
NM_001134383	942	69	120	115	105	102.25	243	400	72	166	220.25		191	479	141	746	389.25	499	749	102	1171	630.25						0.012328	0.0127294	0.015507	0.014862	0.0138566	0.0250077	0.0133842	0.0143971	0.0115262	0.0160788		0.000276465	0.000606908	0.000295208	0.000972092	0.000537668	0.000562169	0.000590426	0.000234589	0.0012499	0.000659272
NM_001038643	673	360	451	260	214	321.25	264	342	212	91	227.25		1175	862	435	794	816.5	730	654	679	458	630.25						0.0643202	0.0478413	0.0350593	0.0302902	0.0443777	0.0271689	0.0114435	0.0423915	0.00631857	0.0218306		0.00170077	0.00109218	0.000910749	0.00103464	0.00118458	0.000822412	0.000515539	0.00156163	0.000488861	0.00084711
NM_019925	363	2805	6188	1319	1167	2869.75	464	865	211	221	440.25		4252	6677	1520	2360	3702.25	503	1339	228	452	630.5						0.501161	0.656412	0.177859	0.16518	0.375153	0.0477514	0.0289433	0.0421916	0.0153451	0.0335578		0.0061546	0.00845997	0.00318239	0.00307525	0.00521805	0.000566676	0.00105552	0.000524375	0.000482457	0.000657256
NM_145133	165	287	442	283	197	302.25	293	434	145	227	274.75		323	767	208	903	550.25	280	1139	208	896	630.75						0.0512775	0.0468866	0.0381607	0.0278839	0.0410522	0.0301533	0.0145218	0.0289942	0.0157617	0.0223578		0.00046753	0.000971814	0.000435484	0.00117667	0.000762876	0.000315446	0.000897858	0.000478378	0.000956374	0.000662014
NM_001134384	1080	74	127	116	109	106.5	251	421	79	176	231.75		191	479	141	751	390.5	501	749	104	1170	631						0.0132214	0.0134719	0.0156419	0.0154282	0.0144408	0.025831	0.0140869	0.0157968	0.0122205	0.0169838		0.000276465	0.000606908	0.000295208	0.000978607	0.000539297	0.000564422	0.000590426	0.000239189	0.00124884	0.000660719
NM_001038845	423	73	176	136	140	131.25	198	372	57	200	206.75		679	429	735	543	596.5	986	546	330	666	632						0.0130427	0.0186698	0.0183387	0.019816	0.0174668	0.0203767	0.0124473	0.0113977	0.013887	0.0145272		0.000982826	0.000543557	0.00153885	0.000707568	0.000943201	0.00111082	0.000430404	0.000758964	0.000710876	0.000752766
NM_001038839	412	73	176	136	140	131.25	199	372	56	201	207		679	429	735	550	598.25	986	546	330	672	633.5						0.0130427	0.0186698	0.0183387	0.019816	0.0174668	0.0204796	0.0124473	0.0111978	0.0139564	0.0145203		0.000982826	0.000543557	0.00153885	0.00071669	0.000945481	0.00111082	0.000430404	0.000758964	0.00071728	0.000754367
NM_024287	189	265	395	306	278	311	581	577	283	346	446.75		378	706	323	666	518.25	620	986	235	695	634						0.0473468	0.0419009	0.0412621	0.0393489	0.0424647	0.0597921	0.0193067	0.0565887	0.0240244	0.039928		0.00054714	0.000894525	0.000676257	0.000867846	0.000746442	0.000698487	0.00077725	0.000540475	0.00074183	0.00068951
NM_001135115	398	190	111	138	423	215.5	178	411	82	312	245.75		612	316	414	1770	778	506	911	194	926	634.25						0.0339468	0.0117747	0.0186084	0.0598726	0.0310506	0.0183184	0.0137523	0.0163967	0.0216637	0.0175328		0.000885846	0.000400382	0.000866782	0.00230644	0.00111486	0.000570055	0.000718129	0.000446179	0.000988395	0.00068069
NM_021604	2015	127	309	153	114	175.75	164	328	118	85	173.75		1904	1138	621	1134	1199.25	814	714	325	685	634.5						0.0226907	0.0327782	0.0206311	0.0161359	0.023059	0.0168776	0.010975	0.0235953	0.00590196	0.0143375		0.00275597	0.00144188	0.00130017	0.00147768	0.00174393	0.000917046	0.000562836	0.000747465	0.000731156	0.000739626
NM_001177303	443	81	344	66	72	140.75	32	79	17	24	38		1093	4304	605	1605	1901.75	519	762	191	1066	634.5						0.014472	0.0364909	0.00889968	0.0101911	0.0175134	0.0032932	0.00264338	0.00339932	0.00166644	0.00275058		0.00158207	0.00545331	0.00126667	0.00209143	0.00259837	0.000584701	0.000600674	0.000439279	0.00113783	0.000690621
NM_001177302	443	81	344	66	72	140.75	32	79	17	24	38		1093	4304	605	1605	1901.75	519	762	191	1066	634.5						0.014472	0.0364909	0.00889968	0.0101911	0.0175134	0.0032932	0.00264338	0.00339932	0.00166644	0.00275058		0.00158207	0.00545331	0.00126667	0.00209143	0.00259837	0.000584701	0.000600674	0.000439279	0.00113783	0.000690621
NM_009024	443	81	344	66	72	140.75	32	79	17	24	38		1093	4304	605	1605	1901.75	519	762	191	1066	634.5						0.014472	0.0364909	0.00889968	0.0101911	0.0175134	0.0032932	0.00264338	0.00339932	0.00166644	0.00275058		0.00158207	0.00545331	0.00126667	0.00209143	0.00259837	0.000584701	0.000600674	0.000439279	0.00113783	0.000690621
NM_009537	395	216	567	284	201	317	396	756	252	274	419.5		382	1125	326	816	662.25	451	893	253	943	635						0.0385921	0.0601464	0.0382956	0.0284501	0.041371	0.0407533	0.0252961	0.0503899	0.0190251	0.0338661		0.00055293	0.00142541	0.000682538	0.00106331	0.000931047	0.000508093	0.000703939	0.000581873	0.00100654	0.000700111
NM_021472	129	220	684	412	285	400.25	423	956	231	386	499		381	979	521	636	629.25	399	833	240	1069	635.25						0.0393068	0.0725575	0.0555556	0.0403397	0.0519399	0.043532	0.0319882	0.0461908	0.0268018	0.0371282		0.000551483	0.00124042	0.0010908	0.000828754	0.000927866	0.00044951	0.000656642	0.000551974	0.00114103	0.000699789
NM_201239	129	220	684	412	285	400.25	423	956	231	386	499		381	979	521	636	629.25	399	833	240	1069	635.25						0.0393068	0.0725575	0.0555556	0.0403397	0.0519399	0.043532	0.0319882	0.0461908	0.0268018	0.0371282		0.000551483	0.00124042	0.0010908	0.000828754	0.000927866	0.00044951	0.000656642	0.000551974	0.00114103	0.000699789
NM_009272	283	60	203	143	210	154	192	591	75	334	298		145	566	146	557	353.5	267	1055	205	1017	636						0.01072	0.0215339	0.0192826	0.029724	0.0203151	0.0197592	0.0197751	0.014997	0.0231912	0.0194306		0.000209882	0.00071714	0.000305677	0.000725811	0.000489627	0.0003008	0.000831642	0.000471478	0.00108553	0.000672362
NM_001033389	556	126	301	171	185	195.75	317	623	133	281	338.5		272	451	169	469	340.25	530	888	163	966	636.75						0.0225121	0.0319296	0.0230583	0.0261854	0.0259213	0.0326232	0.0208459	0.0265947	0.0195112	0.0248937		0.000393709	0.000571431	0.000353831	0.000611141	0.000482528	0.000597094	0.000699998	0.000374882	0.00103109	0.000675766
NM_181848	565	171	273	149	97	172.5	134	149	109	79	117.75		1267	1049	610	586	878	697	643	479	729	637						0.0305521	0.0289594	0.0200917	0.0137297	0.0233332	0.0137903	0.00498561	0.0217956	0.00548535	0.0115142		0.00183393	0.00132912	0.00127714	0.0007636	0.00130095	0.000785234	0.000506868	0.00110165	0.000778121	0.000792968
NM_025388	148	109	259	84	220	168	264	610	84	322	320		234	391	365	542	383	543	1034	310	662	637.25						0.0194747	0.0274743	0.0113269	0.0311394	0.0223538	0.0271689	0.0204109	0.0167966	0.022358	0.0216836		0.000338706	0.00049541	0.000764191	0.000706265	0.000576143	0.000611739	0.000815088	0.000712967	0.000706607	0.0007116
NM_001045513	1247	148	333	145	137	190.75	199	317	99	128	185.75		626	1294	225	983	782	627	853	178	896	638.5						0.0264427	0.0353241	0.0195523	0.0193914	0.0251776	0.0204796	0.010607	0.019796	0.00888765	0.0149426		0.00090611	0.00163954	0.000471077	0.00128092	0.00107441	0.000706373	0.000672408	0.000409381	0.000956374	0.000686134
NM_024184	183	145	146	92	138	130.25	326	386	105	226	260.75		332	551	189	619	422.75	673	864	213	809	639.75						0.0259067	0.0154874	0.0124056	0.0195329	0.0183332	0.0335494	0.0129157	0.0209958	0.0156923	0.0207883		0.000480557	0.000698135	0.000395705	0.000806602	0.00059525	0.000758196	0.000681079	0.000489877	0.000863512	0.000698166
NM_026904	166	85	151	98	118	113	153	417	70	199	209.75		200	671	297	609	444.25	546	990	184	840	640						0.0151867	0.0160178	0.0132147	0.0167021	0.0152803	0.0157456	0.013953	0.0139972	0.0138175	0.0143783		0.000289492	0.000850179	0.000621822	0.000793571	0.000638766	0.000615119	0.000780403	0.00042318	0.000896601	0.000678826
NM_027977	396	198	335	292	239	266	400	678	212	285	393.75		497	558	525	710	572.5	613	793	346	808	640						0.0353761	0.0355362	0.0393743	0.0338287	0.0360288	0.041165	0.0226862	0.0423915	0.0197889	0.0315079		0.000719388	0.000707004	0.00109918	0.000925181	0.000862688	0.000690601	0.000625111	0.000795763	0.000862444	0.00074348
NM_001253864	493	58	201	87	88	108.5	181	405	60	119	191.25		367	663	223	595	462	624	959	120	859	640.5						0.0103627	0.0213217	0.0117314	0.0124558	0.0139679	0.0186271	0.0135515	0.0119976	0.00826274	0.0131097		0.000531218	0.000840042	0.00046689	0.000775328	0.00065337	0.000702993	0.000755966	0.000275987	0.000916881	0.000662957
NM_027496	458	166	592	179	112	262.25	34	90	38	19	45.25		2655	4146	1607	1977	2596.25	474	926	548	619	641.75						0.0296587	0.0627983	0.024137	0.0158528	0.0331117	0.00349902	0.00301144	0.00759848	0.00131926	0.00385705		0.00384301	0.00525311	0.00336454	0.00257617	0.00375921	0.000534004	0.000729953	0.00126034	0.000660709	0.000796252
NM_001176528	440	82	352	65	74	143.25	31	78	17	24	37.5		1100	4373	623	1585	1920.25	521	786	196	1066	642.25						0.0146507	0.0373396	0.00876483	0.0104742	0.0178073	0.00319029	0.00260992	0.00339932	0.00166644	0.00271649		0.00159221	0.00554073	0.00130436	0.00206537	0.00262567	0.000586954	0.000619593	0.000450779	0.00113783	0.000698789
NM_026106	157	123	293	161	131	177	266	336	112	163	219.25		290	1178	232	1003	675.75	456	982	210	923	642.75						0.0219761	0.0310809	0.0217098	0.0185421	0.0233272	0.0273747	0.0112427	0.0223955	0.0113179	0.0180827		0.000419764	0.00149256	0.000485733	0.00130698	0.00092626	0.000513726	0.000774097	0.000482977	0.000985193	0.000688998
NM_001025582	161	68	161	162	157	137	137	357	139	198	207.75		335	635	331	769	517.5	493	943	387	749	643						0.0121494	0.0170786	0.0218447	0.0222222	0.0183237	0.014099	0.0119454	0.0277944	0.0137481	0.0168967		0.000484899	0.000804565	0.000693006	0.00100206	0.000746133	0.00055541	0.000743354	0.000890058	0.000799469	0.000747073
NM_148929	557	236	331	202	206	243.75	218	328	101	188	208.75		1038	960	671	925	898.5	601	752	343	876	643						0.0421654	0.0351119	0.0272384	0.0291578	0.0334184	0.0224349	0.010975	0.020196	0.0130537	0.0166649		0.00150246	0.00121635	0.00140486	0.00120534	0.00133225	0.000677082	0.000592791	0.000788863	0.000935026	0.000748441
NM_001242389	584	128	349	182	114	193.25	107	315	134	104	165		497	753	536	469	563.75	544	793	567	671	643.75						0.0228694	0.0370213	0.0245415	0.0161359	0.025142	0.0110116	0.0105401	0.0267946	0.00722122	0.0138919		0.000719388	0.000954075	0.00112221	0.000611141	0.000851704	0.000612866	0.000625111	0.00130404	0.000716213	0.000814557
NM_053177	561	132	268	174	141	178.75	221	400	136	125	220.5		433	682	499	663	569.25	568	802	421	789	645						0.0235841	0.028429	0.0234628	0.0199575	0.0238583	0.0227436	0.0133842	0.0271946	0.00867935	0.0180004		0.000626751	0.000864116	0.00104474	0.000863937	0.000849887	0.000639904	0.000632205	0.000968255	0.000842164	0.000770632
NM_138312	398	71	199	122	95	121.75	176	427	88	176	216.75		379	642	130	730	470.25	570	894	186	932	645.5						0.0126854	0.0211096	0.0164509	0.0134466	0.0159231	0.0181126	0.0142876	0.0175965	0.0122205	0.0155543		0.000548588	0.000813435	0.000272178	0.000951243	0.000646361	0.000642157	0.000704728	0.00042778	0.0009948	0.000692366
NM_019955	467	156	230	166	221	193.25	468	661	181	316	406.5		353	455	464	680	488	608	717	410	849	646						0.0278721	0.024398	0.022384	0.031281	0.0264838	0.048163	0.0221174	0.0361928	0.0219414	0.0321036		0.000510954	0.0005765	0.000971465	0.000886089	0.000736252	0.000684968	0.000565201	0.000942956	0.000906207	0.000774833
NM_001159318	666	100	164	161	118	135.75	179	347	129	128	195.75		540	690	415	698	585.75	800	739	337	710	646.5						0.0178667	0.0173968	0.0217098	0.0167021	0.0184189	0.0184213	0.0116108	0.0257948	0.00888765	0.0161787		0.000781629	0.000874252	0.000868875	0.000909545	0.000858575	0.000901273	0.000582543	0.000775064	0.000757841	0.00075418
NM_001159317	621	100	164	161	118	135.75	179	347	129	128	195.75		540	690	415	698	585.75	800	739	337	710	646.5						0.0178667	0.0173968	0.0217098	0.0167021	0.0184189	0.0184213	0.0116108	0.0257948	0.00888765	0.0161787		0.000781629	0.000874252	0.000868875	0.000909545	0.000858575	0.000901273	0.000582543	0.000775064	0.000757841	0.00075418
NM_009404	290	910	2890	907	713	1355	119	351	246	145	215.25		7173	11033	4758	4527	6872.75	402	605	970	620	649.25						0.162587	0.306566	0.122303	0.10092	0.173094	0.0122466	0.0117446	0.0491902	0.010068	0.0208124		0.0103826	0.0139792	0.00996171	0.00589901	0.0100556	0.00045289	0.000476913	0.0022309	0.000661777	0.000955619
NM_146114	686	106	115	86	105	103	139	265	69	129	150.5		656	752	253	901	640.5	559	1080	164	795	649.5						0.0189387	0.012199	0.0115965	0.014862	0.0143991	0.0143048	0.00886703	0.0137972	0.00895709	0.0114815		0.000949534	0.000952808	0.0005297	0.00117407	0.000901528	0.000629765	0.000851349	0.000377182	0.000848568	0.000676716
NM_008442	697	89	219	163	134	151.25	254	518	110	146	257		171	609	117	649	386.5	506	904	106	1083	649.75						0.0159014	0.0232311	0.0219795	0.0189667	0.0200197	0.0261398	0.0173325	0.0219956	0.0101375	0.0189013		0.000247516	0.000771623	0.00024496	0.000845694	0.000527448	0.000570055	0.000712611	0.000243789	0.00115597	0.000670607
NM_001253753	608	49	200	81	78	102	136	230	47	122	133.75		298	1166	166	732	590.5	475	1200	104	825	651						0.00875469	0.0212157	0.0109223	0.0110403	0.0129833	0.0139961	0.00769591	0.00939812	0.00847105	0.00989029		0.000431343	0.00147736	0.00034755	0.000953849	0.000802525	0.000535131	0.000945943	0.000239189	0.00088059	0.000650213
NM_001253752	608	49	200	81	78	102	136	230	47	122	133.75		298	1166	166	732	590.5	475	1200	104	825	651						0.00875469	0.0212157	0.0109223	0.0110403	0.0129833	0.0139961	0.00769591	0.00939812	0.00847105	0.00989029		0.000431343	0.00147736	0.00034755	0.000953849	0.000802525	0.000535131	0.000945943	0.000239189	0.00088059	0.000650213
NM_144842	608	49	200	81	78	102	136	230	47	122	133.75		298	1166	166	732	590.5	475	1200	104	825	651						0.00875469	0.0212157	0.0109223	0.0110403	0.0129833	0.0139961	0.00769591	0.00939812	0.00847105	0.00989029		0.000431343	0.00147736	0.00034755	0.000953849	0.000802525	0.000535131	0.000945943	0.000239189	0.00088059	0.000650213
NM_172380	373	167	444	97	97	201.25	131	262	66	110	142.25		778	1827	538	810	988.25	463	1144	380	618	651.25						0.0298374	0.0470988	0.0130798	0.0137297	0.0259364	0.0134815	0.00876665	0.0131974	0.00763783	0.0107708		0.00112612	0.00231487	0.0011264	0.00105549	0.00140572	0.000521612	0.000901799	0.000873959	0.000659642	0.000739253
NM_138596	116	143	350	127	175	198.75	177	449	69	189	221		221	587	322	424	388.5	486	1046	265	810	651.75						0.0255494	0.0371274	0.0171251	0.02477	0.026143	0.0182155	0.0150238	0.0137972	0.0131232	0.0150399		0.000319889	0.000743748	0.000674163	0.000552503	0.000572576	0.000547524	0.000824547	0.000609471	0.000864579	0.00071153
NM_001171053	495	128	241	115	131	153.75	254	395	76	170	223.75		436	552	318	478	446	724	795	433	655	651.75						0.0228694	0.0255649	0.015507	0.0185421	0.0206208	0.0261398	0.0132169	0.015197	0.0118039	0.0165894		0.000631093	0.000699402	0.000665789	0.000622869	0.000654788	0.000815652	0.000626687	0.000995853	0.000699135	0.000784332
NM_172952	750	67	213	220	185	171.25	158	570	189	183	275		272	712	364	865	553.25	433	1053	305	819	652.5						0.0119707	0.0225947	0.0296656	0.0261854	0.0226041	0.0162602	0.0190725	0.0377924	0.0127066	0.0214579		0.000393709	0.000902127	0.000762098	0.00112716	0.000796273	0.000487814	0.000830065	0.000701467	0.000874186	0.000723383
NM_001004157	801	80	138	78	170	116.5	187	474	68	211	235		483	416	278	973	537.5	652	776	318	867	653.25						0.0142934	0.0146388	0.0105178	0.0240623	0.0158781	0.0192446	0.0158603	0.0135973	0.0146507	0.0158382		0.000699124	0.000527085	0.000582042	0.00126789	0.000769035	0.000734538	0.00061171	0.000731366	0.00092542	0.000750758
NM_001145164	396	273	65	220	545	275.75	346	504	118	343	327.75		531	306	266	2013	779	567	935	229	882	653.25						0.0487761	0.00689509	0.0296656	0.0771408	0.0406194	0.0356077	0.0168641	0.0235953	0.0238161	0.0249708		0.000768602	0.000387712	0.000556918	0.00262308	0.00108408	0.000638778	0.000737047	0.000526675	0.000941431	0.000710983
NM_025597	85	57	213	75	109	113.5	99	431	65	163	189.5		430	402	438	204	368.5	757	733	425	703	654.5						0.010184	0.0225947	0.0101133	0.0154282	0.01458	0.0101883	0.0144215	0.0129974	0.0113179	0.0122313		0.000622408	0.000509347	0.00091703	0.000265827	0.000578653	0.00085283	0.000577814	0.000977454	0.000750369	0.000789617
NM_175666	107	990	2001	628	1641	1315	1476	5344	420	3071	2577.75		1112	243	542	683	645	967	754	511	387	654.75						0.17688	0.212263	0.0846818	0.232272	0.176524	0.151899	0.178813	0.0839832	0.213234	0.156982		0.00160958	0.000307889	0.00113477	0.000889999	0.000985559	0.00108941	0.000594368	0.00117524	0.000413077	0.000818026
NM_025683	209	103	249	118	161	157.75	177	543	91	238	262.25		148	747	143	671	427.25	430	1068	135	988	655.25						0.0184027	0.0264135	0.0159115	0.0227884	0.020879	0.0182155	0.018169	0.0181964	0.0165255	0.0177766		0.000214224	0.000946473	0.000299396	0.000874362	0.000583614	0.000484434	0.00084189	0.000310485	0.00105457	0.000672846
NM_021525	354	106	240	109	108	140.75	61	182	104	70	104.25		616	985	686	775	765.5	317	893	787	626	655.75						0.0189387	0.0254588	0.014698	0.0152866	0.0185955	0.00627766	0.00608981	0.0207958	0.00486044	0.00950594		0.000891636	0.00124803	0.00143626	0.00100988	0.00114645	0.00035713	0.000703939	0.00181002	0.000668181	0.000884816
NM_001122960	174	74	146	86	109	103.75	120	354	71	135	170		275	387	290	329	320.25	614	955	388	676	658.25						0.0132214	0.0154874	0.0115965	0.0154282	0.0139334	0.0123495	0.011845	0.0141972	0.0093737	0.0119413		0.000398052	0.000490341	0.000607166	0.000428711	0.000481067	0.000691727	0.000752813	0.000892358	0.00072155	0.000764612
NM_178798	496	145	221	163	135	166	148	413	80	140	195.25		349	1102	438	821	677.5	394	1042	273	927	659						0.0259067	0.0234433	0.0219795	0.0191083	0.0226095	0.015231	0.0138192	0.0159968	0.00972087	0.013692		0.000505164	0.00139627	0.00091703	0.00106982	0.000972071	0.000443877	0.000821394	0.000627871	0.000989463	0.000720651
NM_133708	401	85	127	97	177	121.5	219	393	97	210	229.75		319	515	284	760	469.5	534	860	200	1046	660						0.0151867	0.0134719	0.0130798	0.0250531	0.0166979	0.0225378	0.01315	0.0193961	0.0145813	0.0174163		0.00046174	0.000652522	0.000594604	0.000990335	0.0006748	0.0006016	0.000677926	0.000459978	0.00111648	0.000713996
NM_025595	109	60	150	91	117	104.5	194	499	75	249	254.25		337	287	514	281	354.75	729	894	450	569	660.5						0.01072	0.0159117	0.0122708	0.0165605	0.0138658	0.019965	0.0166968	0.014997	0.0172893	0.017237		0.000487794	0.000363638	0.00107615	0.000366163	0.000573436	0.000821285	0.000704728	0.00103495	0.00060734	0.000792076
NM_172398	297	107	267	133	264	192.75	337	825	84	399	411.25		468	389	453	477	446.75	746	841	344	711	660.5						0.0191174	0.0283229	0.0179342	0.0373673	0.0256854	0.0346815	0.0276049	0.0167966	0.0277045	0.0266969		0.000677412	0.000492875	0.000948435	0.000621566	0.000685072	0.000840437	0.000662949	0.000791163	0.000758908	0.000763364
NM_025875	154	117	300	220	210	211.75	264	533	130	328	313.75		597	749	398	469	553.25	692	929	467	554	660.5						0.0209041	0.0318235	0.0296656	0.029724	0.0280293	0.0271689	0.0178344	0.0259948	0.0227746	0.0234432		0.000864134	0.000949007	0.000833283	0.000611141	0.000814391	0.000779601	0.000732318	0.00107405	0.000591329	0.000794325
NM_018859	282	46	140	101	153	110	148	471	78	224	230.25		153	551	291	617	403	393	1175	166	910	661						0.00821869	0.014851	0.0136192	0.0216561	0.0145862	0.015231	0.0157599	0.0155969	0.0155534	0.0155353		0.000221462	0.000698135	0.000609259	0.000803996	0.000583213	0.000442751	0.000926236	0.000381782	0.000971317	0.000680522
NM_027968	727	85	160	130	99	118.5	122	221	90	92	131.25		600	940	237	901	669.5	774	888	236	748	661.5						0.0151867	0.0169725	0.0175297	0.0140127	0.0159254	0.0125553	0.00739477	0.0179964	0.006388	0.0110836		0.000868476	0.00119101	0.000496201	0.00117407	0.000932439	0.000871982	0.000699998	0.000542775	0.000798401	0.000728289
NM_001168297	727	85	160	130	99	118.5	122	221	90	92	131.25		600	940	237	901	669.5	774	888	236	748	661.5						0.0151867	0.0169725	0.0175297	0.0140127	0.0159254	0.0125553	0.00739477	0.0179964	0.006388	0.0110836		0.000868476	0.00119101	0.000496201	0.00117407	0.000932439	0.000871982	0.000699998	0.000542775	0.000798401	0.000728289
NM_001004140	645	92	100	115	118	106.25	361	328	153	190	258		535	262	307	537	410.25	981	624	337	706	662						0.0164374	0.0106078	0.015507	0.0167021	0.0148136	0.0371514	0.010975	0.0305939	0.0131926	0.0229782		0.000774392	0.000331962	0.000642758	0.00069975	0.000612216	0.00110519	0.000491891	0.000775064	0.000753571	0.000781428
NM_029872	286	265	515	215	233	307	460	545	191	181	344.25		344	604	195	555	424.5	640	938	267	804	662.25						0.0473468	0.0546303	0.0289914	0.0329795	0.040987	0.0473397	0.018236	0.0381924	0.0125677	0.0290839		0.000497927	0.000765287	0.000408267	0.000723205	0.000598671	0.000721019	0.000739412	0.000614071	0.000858175	0.000733169
NM_010395	360	1035	2203	770	778	1196.5	1500	2003	718	505	1181.5		797	499	608	484	597	943	696	435	576	662.5						0.18492	0.23369	0.10383	0.11012	0.15814	0.154369	0.0670213	0.143571	0.0350646	0.100006		0.00115363	0.000632249	0.00127295	0.000630687	0.000922379	0.00106238	0.000548647	0.00100045	0.000614812	0.000806572
NM_134125	528	131	353	196	118	199.5	121	318	147	105	172.75		523	778	544	489	583.5	564	824	584	680	663						0.0234054	0.0374456	0.0264293	0.0167021	0.0259956	0.0124524	0.0106404	0.0293941	0.00729065	0.0149444		0.000757022	0.000985751	0.00113896	0.000637202	0.000879734	0.000635398	0.000649548	0.00134314	0.00072582	0.000838476
NM_018825	602	126	364	116	125	182.75	168	343	53	93	164.25		1013	1914	410	1189	1131.5	575	937	317	827	664						0.0225121	0.0386125	0.0156419	0.0176929	0.0236148	0.0172893	0.0114769	0.0105979	0.00645744	0.0114554		0.00146628	0.0024251	0.000858407	0.00154935	0.00157478	0.00064779	0.000738624	0.000729066	0.000882725	0.000749551
NM_030749	446	120	225	185	128	164.5	216	392	150	173	232.75		457	536	739	476	552	559	847	487	766	664.75						0.0214401	0.0238676	0.0249461	0.0181175	0.0220928	0.0222291	0.0131165	0.029994	0.0120122	0.019338		0.00066149	0.000679129	0.00154723	0.000620263	0.000877027	0.000629765	0.000667678	0.00112005	0.000817614	0.000808776
NM_001252478	446	207	310	228	210	238.75	178	454	128	175	233.75		631	869	563	948	752.75	509	809	446	895	664.75						0.0369841	0.0328843	0.0307443	0.029724	0.0325842	0.0183184	0.0151911	0.0255949	0.0121511	0.0178139		0.000913348	0.00110105	0.00117874	0.00123531	0.00110711	0.000573435	0.000637723	0.00102575	0.000955307	0.000798054
NM_001110205	490	120	250	182	147	174.75	335	489	118	197	284.75		525	576	275	773	537.25	812	799	132	917	665						0.0214401	0.0265196	0.0245415	0.0208068	0.023327	0.0344757	0.0163622	0.0235953	0.0136787	0.0220279		0.000759917	0.00072981	0.000575761	0.00100728	0.000768191	0.000914792	0.000629841	0.000303586	0.000978789	0.000706752
NM_001110204	490	120	250	182	147	174.75	335	489	118	197	284.75		525	576	275	773	537.25	812	799	132	917	665						0.0214401	0.0265196	0.0245415	0.0208068	0.023327	0.0344757	0.0163622	0.0235953	0.0136787	0.0220279		0.000759917	0.00072981	0.000575761	0.00100728	0.000768191	0.000914792	0.000629841	0.000303586	0.000978789	0.000706752
NM_007394	490	120	250	182	147	174.75	335	489	118	197	284.75		525	576	275	773	537.25	812	799	132	917	665						0.0214401	0.0265196	0.0245415	0.0208068	0.023327	0.0344757	0.0163622	0.0235953	0.0136787	0.0220279		0.000759917	0.00072981	0.000575761	0.00100728	0.000768191	0.000914792	0.000629841	0.000303586	0.000978789	0.000706752
NM_010752	698	86	162	64	127	109.75	273	385	68	210	234		428	326	382	363	374.75	1031	658	351	621	665.25						0.0153654	0.0171847	0.00862999	0.0179759	0.014789	0.0280951	0.0128823	0.0135973	0.0145813	0.017289		0.000619513	0.000413052	0.000799784	0.000473015	0.000576341	0.00116152	0.000518692	0.000807262	0.000662844	0.000787579
NM_025366	99	65	245	81	129	130	139	759	62	224	296		393	638	507	708	561.5	709	908	506	538	665.25						0.0116134	0.0259892	0.0109223	0.018259	0.016696	0.0143048	0.0253965	0.0123975	0.0155534	0.0169131		0.000568852	0.000808366	0.00106149	0.000922575	0.000840322	0.000798754	0.000715764	0.00116375	0.000574251	0.000813129
NM_001163709	102	90	391	129	123	183.25	102	190	72	100	116		356	671	781	543	587.75	544	709	861	548	665.5						0.01608	0.0414766	0.0173948	0.0174098	0.0230903	0.0104971	0.00635749	0.0143971	0.00694348	0.00954879		0.000515296	0.000850179	0.00163516	0.000707568	0.000927051	0.000612866	0.000558895	0.00198021	0.000584925	0.000934223
NM_026721	342	68	230	78	92	117	117	322	50	86	143.75		160	555	288	668	417.75	459	1043	295	866	665.75						0.0121494	0.024398	0.0105178	0.0130219	0.0150218	0.0120408	0.0107743	0.009998	0.00597139	0.00969611		0.000231594	0.000703203	0.000602978	0.000870452	0.000602057	0.000517106	0.000822182	0.000678468	0.000924353	0.000735527
NM_026312	179	72	191	107	127	124.25	141	365	74	220	200		315	869	268	647	524.75	318	1117	315	913	665.75						0.012864	0.020261	0.0144283	0.0179759	0.0163823	0.0145107	0.0122131	0.014797	0.0152757	0.0141991		0.00045595	0.00110105	0.000561105	0.000843088	0.000740298	0.000358256	0.000880516	0.000724466	0.000974519	0.000734439
NM_133705	301	83	150	76	158	116.75	274	558	94	217	285.75		243	288	449	522	375.5	839	766	422	637	666						0.0148294	0.0159117	0.0102481	0.0223638	0.0158382	0.028198	0.0186709	0.0187962	0.0150674	0.0201831		0.000351733	0.000364905	0.00094006	0.000680204	0.000584226	0.00094521	0.000603827	0.000970554	0.000679922	0.000799879
NM_023166	157	53	157	69	140	104.75	174	347	72	170	190.75		222	440	288	466	354	447	934	292	994	666.75						0.00946936	0.0166543	0.00930421	0.019816	0.013811	0.0179068	0.0116108	0.0143971	0.0118039	0.0139296		0.000321336	0.000557494	0.000602978	0.000607232	0.00052226	0.000503587	0.000736259	0.000671569	0.00106098	0.000743098
NM_013888	179	106	243	87	76	128	142	246	19	83	122.5		785	729	386	452	588	771	1035	211	652	667.25						0.0189387	0.025777	0.0117314	0.0107573	0.0168011	0.0146136	0.00823128	0.00379924	0.00576309	0.00810179		0.00113626	0.000923666	0.000808159	0.000588989	0.000864268	0.000868602	0.000815876	0.000485277	0.000695933	0.000716422
NM_134255	280	340	521	228	360	362.25	458	780	145	440	455.75		751	697	401	578	606.75	836	763	299	771	667.25						0.0607468	0.0552668	0.0307443	0.0509554	0.0494283	0.0471339	0.0260992	0.0289942	0.0305513	0.0331946		0.00108704	0.000883121	0.000839564	0.000753176	0.000890726	0.000941831	0.000601462	0.000687668	0.000822951	0.000763478
NM_019388	290	432	762	196	245	408.75	427	456	82	212	294.25		1826	1677	521	917	1235.25	884	947	265	575	667.75						0.0771842	0.0808317	0.0264293	0.034678	0.0547808	0.0439436	0.015258	0.0163967	0.0147202	0.0225796		0.00264306	0.00212481	0.0010908	0.00119492	0.0017634	0.000995907	0.000746507	0.000609471	0.000613744	0.000741407
NM_001110212	1266	237	414	283	280	303.5	511	573	221	372	419.25		501	827	263	721	578	821	662	212	978	668.25						0.0423441	0.0439164	0.0381607	0.039632	0.0410133	0.0525882	0.0191729	0.0441912	0.0258297	0.0354455		0.000725178	0.00104784	0.000550637	0.000939515	0.000815791	0.000924932	0.000521845	0.000487577	0.0010439	0.000744563
NM_001033299	1022	233	385	150	155	230.75	275	362	133	157	231.75		650	1301	241	796	747	674	931	160	921	671.5						0.0416294	0.0408401	0.0202265	0.0219391	0.0311588	0.0283009	0.0121127	0.0265947	0.0109013	0.0194774		0.00094085	0.00164841	0.000504576	0.00103725	0.00103277	0.000759323	0.000733894	0.000367983	0.000983059	0.000711065
NM_001159683	1022	233	385	150	155	230.75	275	362	133	157	231.75		650	1301	241	796	747	674	931	160	921	671.5						0.0416294	0.0408401	0.0202265	0.0219391	0.0311588	0.0283009	0.0121127	0.0265947	0.0109013	0.0194774		0.00094085	0.00164841	0.000504576	0.00103725	0.00103277	0.000759323	0.000733894	0.000367983	0.000983059	0.000711065
NM_001163502	1070	121	235	110	112	144.5	122	319	75	130	161.5		458	1016	209	779	615.5	490	903	121	1173	671.75						0.0216187	0.0249284	0.0148328	0.0158528	0.0193082	0.0125553	0.0106739	0.014997	0.00902652	0.0118132		0.000662937	0.0012873	0.000437578	0.00101509	0.000850728	0.00055203	0.000711822	0.000278287	0.00125204	0.000698544
NM_001163501	1070	121	235	110	112	144.5	122	319	75	130	161.5		458	1016	209	779	615.5	490	903	121	1173	671.75						0.0216187	0.0249284	0.0148328	0.0158528	0.0193082	0.0125553	0.0106739	0.014997	0.00902652	0.0118132		0.000662937	0.0012873	0.000437578	0.00101509	0.000850728	0.00055203	0.000711822	0.000278287	0.00125204	0.000698544
NM_001164204	297	67	244	68	157	134	278	497	66	233	268.5		251	691	216	697	463.75	670	997	284	737	672						0.0119707	0.0258831	0.00916936	0.0222222	0.0173113	0.0286097	0.0166299	0.0131974	0.0161783	0.0186538		0.000363313	0.000875519	0.000452234	0.000908242	0.000649827	0.000754816	0.000785921	0.000653169	0.00078666	0.000745142
NM_024168	297	67	244	68	157	134	278	497	66	233	268.5		251	691	216	697	463.75	670	997	284	737	672						0.0119707	0.0258831	0.00916936	0.0222222	0.0173113	0.0286097	0.0166299	0.0131974	0.0161783	0.0186538		0.000363313	0.000875519	0.000452234	0.000908242	0.000649827	0.000754816	0.000785921	0.000653169	0.00078666	0.000745142
NM_001243161	473	96	135	130	111	118	170	370	124	165	207.25		304	626	209	717	464	494	1009	351	834	672						0.017152	0.0143206	0.0175297	0.0157113	0.0161784	0.0174951	0.0123804	0.024795	0.0114567	0.0165318		0.000440028	0.000793162	0.000437578	0.000934303	0.000651268	0.000556536	0.000795381	0.000807262	0.000890196	0.000762344
NM_080837	147	190	447	252	280	292.25	392	889	186	315	445.5		406	618	525	459	502	617	940	496	635	672						0.0339468	0.047417	0.0339806	0.039632	0.0387441	0.0403417	0.0297464	0.0371926	0.021872	0.0322881		0.000587669	0.000783026	0.00109918	0.00059811	0.000766996	0.000695107	0.000740989	0.00114075	0.000677787	0.000813657
NM_022985	204	169	308	205	197	219.75	315	524	149	355	335.75		288	719	220	755	495.5	577	1050	299	767	673.25						0.0301947	0.0326721	0.0276429	0.0278839	0.0295984	0.0324174	0.0175333	0.029794	0.0246494	0.0260985		0.000416869	0.000910996	0.000460609	0.00098382	0.000693073	0.000650043	0.0008277	0.000687668	0.000818682	0.000746023
NM_021288	288	118	175	150	162	151.25	296	581	111	247	308.75		314	379	323	335	337.75	808	883	312	693	674						0.0210827	0.0185637	0.0202265	0.0229299	0.0207007	0.0304621	0.0194405	0.0221956	0.0171504	0.0223121		0.000454503	0.000480205	0.000676257	0.000436529	0.000511874	0.000910286	0.000696057	0.000717566	0.000739695	0.000765901
NM_001198794	207	83	166	111	82	110.5	142	132	40	99	103.25		635	691	581	597	626	935	605	368	790	674.5						0.0148294	0.017609	0.0149676	0.0116065	0.0147531	0.0146136	0.00441678	0.0079984	0.00687405	0.0084757		0.000919138	0.000875519	0.00121643	0.000777934	0.000947254	0.00105336	0.000476913	0.00084636	0.000843232	0.000804967
NM_001171054	494	124	242	118	129	153.25	255	399	77	170	225.25		433	569	322	514	459.5	753	823	433	691	675						0.0221547	0.0256709	0.0159115	0.018259	0.0204991	0.0262427	0.0133507	0.0153969	0.0118039	0.0166986		0.000626751	0.000720941	0.000674163	0.000669779	0.000672909	0.000848324	0.000648759	0.000995853	0.000737561	0.000807624
NM_008390	310	1630	5046	1044	1464	2296	224	843	154	390	402.75		4348	7468	2586	4856	4814.5	315	1105	290	990	675						0.291227	0.535271	0.140777	0.207219	0.293623	0.0230524	0.0282072	0.0307938	0.0270796	0.0272832		0.00629356	0.0094622	0.00541424	0.00632772	0.00687443	0.000354876	0.000871056	0.000666969	0.00105671	0.000737402
NM_001159396	310	1630	5046	1044	1464	2296	224	843	154	390	402.75		4348	7468	2586	4856	4814.5	315	1105	290	990	675						0.291227	0.535271	0.140777	0.207219	0.293623	0.0230524	0.0282072	0.0307938	0.0270796	0.0272832		0.00629356	0.0094622	0.00541424	0.00632772	0.00687443	0.000354876	0.000871056	0.000666969	0.00105671	0.000737402
NM_201373	715	105	101	105	125	109	199	294	83	136	178		392	502	289	1070	563.25	877	648	164	1012	675.25						0.0187601	0.0107139	0.0141586	0.0176929	0.0153313	0.0204796	0.00983738	0.0165967	0.00944313	0.0140892		0.000567405	0.00063605	0.000605072	0.00139429	0.000800704	0.000988021	0.000510809	0.000377182	0.00108019	0.000739051
NM_001242390	583	129	350	185	114	194.5	106	311	134	105	164		468	780	543	468	564.75	552	866	579	704	675.25						0.0230481	0.0371274	0.0249461	0.0161359	0.0253144	0.0109087	0.0104062	0.0267946	0.00729065	0.0138501		0.000677412	0.000988285	0.00113687	0.000609838	0.0008531	0.000621879	0.000682656	0.00133164	0.000751437	0.000846902
NM_009460	82	238	619	254	222	333.25	234	691	89	354	342		1017	1050	690	596	838.25	715	1050	469	472	676.5						0.0425228	0.0656625	0.0342503	0.0314225	0.0434645	0.0240815	0.0231212	0.0177964	0.0245799	0.0223948		0.00147207	0.00133038	0.00144464	0.000776631	0.00125593	0.000805513	0.0008277	0.00107865	0.000503804	0.000803917
NM_022995	255	60	280	51	45	109	93	76	14	18	50.25		457	2193	441	732	955.75	641	1098	207	763	677.25						0.01072	0.0297019	0.00687702	0.00636943	0.0134171	0.00957086	0.002543	0.00279944	0.00124983	0.00404078		0.00066149	0.0027786	0.000923311	0.000953849	0.00132931	0.000722145	0.000865538	0.000476078	0.000814412	0.000719543
NM_001122766	300	90	135	111	190	131.5	283	363	114	272	258		345	333	296	488	365.5	686	827	325	872	677.5						0.01608	0.0143206	0.0149676	0.0268931	0.0180653	0.0291242	0.0121462	0.0227954	0.0188863	0.020738		0.000499374	0.000421922	0.000619728	0.000635899	0.000544231	0.000772842	0.000651913	0.000747465	0.000930757	0.000775744
NM_144798	441	213	312	229	212	241.5	182	458	128	181	237.25		652	884	578	961	768.75	514	842	451	907	678.5						0.0380561	0.0330964	0.0308792	0.0300071	0.0330097	0.0187301	0.0153249	0.0255949	0.0125677	0.0180544		0.000943744	0.00112006	0.00121014	0.00125225	0.00113155	0.000579068	0.000663737	0.00103725	0.000968115	0.000812043
NM_030004	300	135	153	132	198	154.5	355	527	114	285	320.25		325	383	263	574	386.25	870	696	212	938	679						0.0241201	0.01623	0.0177994	0.0280255	0.0215437	0.0365339	0.0176337	0.0227954	0.0197889	0.024188		0.000470425	0.000485273	0.000550637	0.000747964	0.000563575	0.000980135	0.000548647	0.000487577	0.0010012	0.000754391
NM_153789	426	47	226	89	81	110.75	83	144	38	97	90.5		359	966	419	796	635	511	958	185	1062	679						0.00839736	0.0239737	0.0120011	0.011465	0.0139593	0.00854173	0.00481831	0.00759848	0.00673518	0.00692342		0.000519638	0.00122395	0.00087725	0.00103725	0.000914522	0.000575688	0.000755178	0.00042548	0.00113356	0.000722476
NM_029271	168	107	156	121	155	134.75	192	454	111	263	255		242	555	355	561	428.25	430	1298	323	668	679.75						0.0191174	0.0165482	0.0163161	0.0219391	0.0184802	0.0197592	0.0151911	0.0221956	0.0182614	0.0188518		0.000350286	0.000703203	0.000743255	0.000731024	0.000631942	0.000484434	0.0010232	0.000742865	0.000713011	0.000740876
NM_017476	622	84	250	84	102	130	158	333	58	122	167.75		884	651	346	562	610.75	1144	758	212	605	679.75						0.015008	0.0265196	0.0113269	0.0144374	0.016823	0.0162602	0.0111423	0.0115977	0.00847105	0.0118678		0.00127956	0.000824838	0.000724412	0.000732327	0.000890283	0.00128882	0.000597521	0.000487577	0.000645766	0.000754921
NM_001160379	409	123	59	126	139	111.75	133	236	82	126	144.25		770	333	312	1186	650.25	939	626	218	936	679.75						0.0219761	0.00625862	0.0169903	0.0196745	0.0162249	0.0136874	0.00789667	0.0163967	0.00874878	0.0116824		0.00111454	0.000421922	0.000653227	0.00154544	0.000933784	0.00105787	0.000493467	0.000501376	0.000999069	0.000762946
NM_010766	499	36	3	392	219	162.5	89	75	568	422	288.5		158	3	1081	382	406	155	39	1399	1130	680.75						0.00643202	0.000318235	0.0528587	0.0309979	0.0226517	0.00915921	0.00250954	0.113577	0.0293015	0.0386369		0.000228699	3.8011e-06	0.00226326	0.000497774	0.000748384	0.000174622	3.07432e-05	0.00321755	0.00120614	0.00115726
NM_009259	376	126	70	293	80	142.25	206	184	180	117	171.75		687	208	1158	369	605.5	860	527	840	498	681.25						0.0225121	0.00742548	0.0395092	0.0113234	0.0201925	0.0212	0.00615673	0.0359928	0.00812387	0.0178683		0.000994406	0.000263543	0.00242448	0.000480834	0.00104081	0.000968869	0.000415427	0.00193191	0.000531556	0.00096194
NM_001166368	121	134	333	174	191	208	242	555	97	218	278		715	514	399	206	458.5	1265	406	495	560	681.5						0.0239414	0.0353241	0.0234628	0.0270347	0.0274407	0.0249048	0.0185706	0.0193961	0.0151368	0.0195021		0.00103493	0.000651254	0.000835376	0.000268433	0.0006975	0.00142514	0.000320044	0.00113845	0.000597734	0.000870341
NM_008020	121	134	333	174	191	208	242	555	97	218	278		715	514	399	206	458.5	1265	406	495	560	681.5						0.0239414	0.0353241	0.0234628	0.0270347	0.0274407	0.0249048	0.0185706	0.0193961	0.0151368	0.0195021		0.00103493	0.000651254	0.000835376	0.000268433	0.0006975	0.00142514	0.000320044	0.00113845	0.000597734	0.000870341
NM_001159888	170	321	819	429	517	521.5	666	1584	249	737	809		327	824	312	888	587.75	404	1154	238	930	681.5						0.0573522	0.0868781	0.0578479	0.0731776	0.068814	0.0685397	0.0530014	0.04979	0.0511734	0.0556261		0.00047332	0.00104403	0.000653227	0.00115713	0.000831927	0.000455143	0.000909682	0.000547374	0.000992665	0.000726216
NM_001256480_dup4	479	70	137	95	98	100	383	501	89	232	301.25		148	524	60	502	308.5	465	1435	94	735	682.25						0.0125067	0.0145327	0.0128101	0.0138712	0.0134302	0.0394155	0.0167637	0.0177964	0.0161089	0.0225211		0.000214224	0.000663925	0.000125621	0.000654142	0.000414478	0.000523865	0.00113119	0.00021619	0.000784526	0.000663943
NM_001101804_dup4	479	70	137	95	98	100	383	501	89	232	301.25		148	524	60	502	308.5	465	1435	94	735	682.25						0.0125067	0.0145327	0.0128101	0.0138712	0.0134302	0.0394155	0.0167637	0.0177964	0.0161089	0.0225211		0.000214224	0.000663925	0.000125621	0.000654142	0.000414478	0.000523865	0.00113119	0.00021619	0.000784526	0.000663943
NM_001099349_dup5	479	70	137	95	98	100	383	501	89	232	301.25		148	524	60	502	308.5	465	1435	94	735	682.25						0.0125067	0.0145327	0.0128101	0.0138712	0.0134302	0.0394155	0.0167637	0.0177964	0.0161089	0.0225211		0.000214224	0.000663925	0.000125621	0.000654142	0.000414478	0.000523865	0.00113119	0.00021619	0.000784526	0.000663943
NM_001100415_dup4	479	70	137	95	98	100	383	501	89	232	301.25		148	524	60	502	308.5	465	1435	94	735	682.25						0.0125067	0.0145327	0.0128101	0.0138712	0.0134302	0.0394155	0.0167637	0.0177964	0.0161089	0.0225211		0.000214224	0.000663925	0.000125621	0.000654142	0.000414478	0.000523865	0.00113119	0.00021619	0.000784526	0.000663943
NM_001177543_dup4	479	70	137	95	98	100	383	501	89	232	301.25		148	524	60	502	308.5	465	1435	94	735	682.25						0.0125067	0.0145327	0.0128101	0.0138712	0.0134302	0.0394155	0.0167637	0.0177964	0.0161089	0.0225211		0.000214224	0.000663925	0.000125621	0.000654142	0.000414478	0.000523865	0.00113119	0.00021619	0.000784526	0.000663943
NM_001100416_dup4	479	70	137	95	98	100	383	501	89	232	301.25		148	524	60	502	308.5	465	1435	94	735	682.25						0.0125067	0.0145327	0.0128101	0.0138712	0.0134302	0.0394155	0.0167637	0.0177964	0.0161089	0.0225211		0.000214224	0.000663925	0.000125621	0.000654142	0.000414478	0.000523865	0.00113119	0.00021619	0.000784526	0.000663943
NM_026932	287	134	342	242	236	238.5	348	846	187	401	445.5		342	510	435	420	426.75	658	1040	358	677	683.25						0.0239414	0.0362788	0.0326321	0.0334041	0.0315641	0.0358135	0.0283076	0.0373925	0.0278434	0.0323392		0.000495032	0.000646186	0.000910749	0.00054729	0.000649814	0.000741297	0.000819818	0.000823361	0.000722617	0.000776773
NM_148928	495	76	192	90	107	116.25	156	389	70	143	189.5		469	786	532	578	591.25	739	962	336	697	683.5						0.0135787	0.020367	0.0121359	0.0151451	0.0153067	0.0160543	0.0130161	0.0139972	0.00992918	0.0132492		0.000678859	0.000995887	0.00111384	0.000753176	0.000885439	0.000832551	0.000758331	0.000772764	0.000743965	0.000776903
NM_011673	375	298	490	289	139	304	203	209	180	73	166.25		996	1225	676	958	963.75	589	865	611	670	683.75						0.0532428	0.0519784	0.0389698	0.0196745	0.0409664	0.0208912	0.00699324	0.0359928	0.00506874	0.0172365		0.00144167	0.00155211	0.00141532	0.00124834	0.00141436	0.000663563	0.000681867	0.00140523	0.000715146	0.000866452
NM_030087	449	97	236	67	317	179.25	243	883	101	454	420.25		327	348	409	265	337.25	803	848	442	643	684						0.0173307	0.0250345	0.00903452	0.0448691	0.0240672	0.0250077	0.0295456	0.020196	0.0315234	0.0265682		0.00047332	0.000440927	0.000856313	0.000345314	0.000528969	0.000904653	0.000668467	0.00101655	0.000686326	0.000819
NM_028287	547	105	100	102	110	104.25	142	205	82	96	131.25		889	814	327	1549	894.75	744	1077	259	659	684.75						0.0187601	0.0106078	0.013754	0.0155697	0.0146729	0.0146136	0.0068594	0.0163967	0.00666574	0.0111339		0.00128679	0.00103136	0.000684632	0.00201846	0.00125531	0.000838184	0.000848984	0.000595672	0.000703405	0.000746561
NM_001159887	177	336	826	451	528	535.25	690	1629	255	745	829.75		311	829	315	897	588	395	1154	241	953	685.75						0.0600322	0.0876207	0.0608145	0.0747346	0.0708005	0.0710096	0.0545071	0.0509898	0.0517289	0.0570589		0.00045016	0.00105037	0.000659508	0.00116886	0.000832223	0.000445004	0.000909682	0.000554274	0.00101721	0.000731544
NM_172627	358	117	299	138	147	175.25	204	441	94	163	225.5		650	1013	280	868	702.75	850	779	230	885	686						0.0209041	0.0317174	0.0186084	0.0208068	0.0230092	0.0209941	0.0147561	0.0187962	0.0113179	0.0164661		0.00094085	0.0012835	0.000586229	0.00113107	0.000985412	0.000957603	0.000614075	0.000528975	0.000944633	0.000761321
NM_011576	287	63	189	94	86	108	152	410	83	128	193.25		497	523	529	395	486	732	1004	307	702	686.25						0.011256	0.0200488	0.0126753	0.0121727	0.0140382	0.0156427	0.0137188	0.0165967	0.00888765	0.0137115		0.000719388	0.000662658	0.00110755	0.000514714	0.000751078	0.000824665	0.000791439	0.000706067	0.000749302	0.000767868
NM_028264	238	103	308	133	152	174	159	436	73	194	215.5		325	905	263	726	554.75	580	1177	177	811	686.25						0.0184027	0.0326721	0.0179342	0.0215145	0.0226309	0.0163631	0.0145888	0.0145971	0.0134704	0.0147548		0.000470425	0.00114666	0.000550637	0.000946031	0.000778439	0.000653423	0.000927813	0.000407081	0.000865647	0.000713491
NM_025567	306	196	399	192	306	273.25	471	1204	198	435	577		360	522	316	743	485.25	748	836	334	830	687						0.0350188	0.0423252	0.02589	0.0433121	0.0366365	0.0484718	0.0402864	0.0395921	0.0302041	0.0396386		0.000521086	0.000661391	0.000661601	0.000968183	0.000703065	0.000842691	0.000659007	0.000768164	0.000885927	0.000788947
NM_152822	740	69	140	145	145	124.75	233	478	112	196	254.75		371	443	197	596	401.75	766	884	221	881	688						0.012328	0.014851	0.0195523	0.0205237	0.0168138	0.0239786	0.0159941	0.0223955	0.0136092	0.0189944		0.000537008	0.000561295	0.000412454	0.000776631	0.000571847	0.000862969	0.000696845	0.000508276	0.000940363	0.000752113
NM_008234	802	87	155	116	62	105	149	365	78	154	186.5		469	780	201	676	531.5	553	1057	103	1039	688						0.015544	0.0164421	0.0156419	0.00877565	0.0141009	0.015334	0.0122131	0.0155969	0.010693	0.0134592		0.000678859	0.000988285	0.000420829	0.000880877	0.000742212	0.000623005	0.000833218	0.000236889	0.00110901	0.000700531
NM_172773	476	53	215	127	129	131	128	415	76	167	196.5		393	901	442	655	597.75	711	892	259	891	688.25						0.00946936	0.0228068	0.0171251	0.018259	0.0169151	0.0131728	0.0138861	0.015197	0.0115956	0.0134629		0.000568852	0.0011416	0.000925404	0.000853512	0.000872341	0.000801007	0.000703151	0.000595672	0.000951037	0.000762717
NM_146112	1272	237	416	283	283	304.75	515	574	221	373	420.75		520	852	270	738	595	829	681	214	1030	688.5						0.0423441	0.0441286	0.0381607	0.0400566	0.0411725	0.0529999	0.0192063	0.0441912	0.0258992	0.0355741		0.00075268	0.00107951	0.000565292	0.000961668	0.000839788	0.000933945	0.000536823	0.000492177	0.0010994	0.000765587
NM_001159889	170	321	819	429	517	521.5	666	1584	249	737	809		327	825	312	891	588.75	430	1154	240	934	689.5						0.0573522	0.0868781	0.0578479	0.0731776	0.068814	0.0685397	0.0530014	0.04979	0.0511734	0.0556261		0.00047332	0.0010453	0.000653227	0.00116104	0.000833221	0.000484434	0.000909682	0.000551974	0.000996934	0.000735756
NM_009357	177	93	144	127	91	113.75	105	123	31	85	86		205	614	354	556	432.25	548	1012	281	922	690.75						0.016616	0.0152753	0.0171251	0.0128804	0.0154742	0.0108058	0.00411564	0.00619876	0.00590196	0.00675554		0.000296729	0.000777958	0.000741161	0.000724508	0.000635089	0.000617372	0.000797746	0.00064627	0.000984126	0.000761378
NM_018888	276	90	134	102	122	112	166	350	70	167	188.25		370	560	292	555	444.25	505	1099	247	914	691.25						0.01608	0.0142145	0.013754	0.0172682	0.0153292	0.0170835	0.0117112	0.0139972	0.0115956	0.0135969		0.00053556	0.000709538	0.000611353	0.000723205	0.000644914	0.000568929	0.000866326	0.000568073	0.000975587	0.000744729
NM_001173459	372	61	77	242	61	110.25	147	179	221	89	159		215	255	1083	380	483.25	585	692	969	521	691.75						0.0108987	0.00816803	0.0326321	0.00863411	0.0150832	0.0151281	0.00598943	0.0441912	0.0061797	0.0178721		0.000311204	0.000323093	0.00226745	0.000495168	0.000849229	0.000659056	0.000545494	0.0022286	0.000556106	0.000997313
NM_025774	167	67	253	86	112	129.5	128	340	58	138	166		865	384	708	194	537.75	1210	488	576	493	691.75						0.0119707	0.0268378	0.0115965	0.0158528	0.0165645	0.0131728	0.0113766	0.0115977	0.009582	0.0114323		0.00125205	0.00048654	0.00148232	0.000252796	0.000868428	0.00136318	0.000384684	0.00132474	0.000526219	0.000899704
NM_024187	220	291	822	300	448	465.25	564	1333	311	547	688.75		744	418	563	389	528.5	1105	609	628	427	692.25						0.0519921	0.0871964	0.0404531	0.0634112	0.0607632	0.0580426	0.0446028	0.0621876	0.0379808	0.0507035		0.00107691	0.000529619	0.00117874	0.000506895	0.000823041	0.00124488	0.000480066	0.00144433	0.000455772	0.000906264
NM_007929	153	111	420	126	238	223.75	245	874	76	309	376		195	870	310	802	544.25	489	1117	239	924	692.25						0.0198321	0.0445529	0.0169903	0.0336872	0.0287656	0.0252135	0.0292445	0.015197	0.0214554	0.0227776		0.000282255	0.00110232	0.000649039	0.00104506	0.000769669	0.000550903	0.000880516	0.000549674	0.000986261	0.000741838
NM_001195130	831	95	182	90	86	113.25	144	149	55	74	105.5		569	717	372	700	589.5	769	847	260	899	693.75						0.0169734	0.0193062	0.0121359	0.0121727	0.0151471	0.0148194	0.00498561	0.0109978	0.00513818	0.00898524		0.000823605	0.000908462	0.000778847	0.000912151	0.000855766	0.000866349	0.000667678	0.000597972	0.000959576	0.000772894
NM_018774	831	95	182	90	86	113.25	144	149	55	74	105.5		569	717	372	700	589.5	769	847	260	899	693.75						0.0169734	0.0193062	0.0121359	0.0121727	0.0151471	0.0148194	0.00498561	0.0109978	0.00513818	0.00898524		0.000823605	0.000908462	0.000778847	0.000912151	0.000855766	0.000866349	0.000667678	0.000597972	0.000959576	0.000772894
NM_001242391	527	132	354	199	118	200.75	120	314	147	106	171.75		494	805	551	488	584.5	572	897	596	713	694.5						0.0235841	0.0375517	0.0268339	0.0167021	0.0261679	0.0123495	0.0105066	0.0293941	0.00736009	0.0149026		0.000715046	0.00101996	0.00115362	0.000635899	0.00088113	0.00064441	0.000707093	0.00137074	0.000761043	0.00087082
NM_177363	269	181	59	141	166	136.75	260	220	267	130	219.25		590	277	385	848	525	399	998	626	756	694.75						0.0323388	0.00625862	0.0190129	0.0234961	0.0202766	0.0267572	0.00736131	0.0533893	0.00902652	0.0241336		0.000854002	0.000350968	0.000806065	0.00110501	0.00077901	0.00044951	0.000786709	0.00143973	0.000806941	0.000870723
NM_011932	261	441	1259	301	312	578.25	187	282	28	166	165.75		2954	4439	1378	2055	2706.5	808	907	224	841	695						0.0787922	0.133553	0.0405879	0.0441614	0.0742735	0.0192446	0.00943586	0.00559888	0.0115262	0.0114514		0.0042758	0.00562436	0.00288508	0.00267781	0.00386576	0.000910286	0.000714975	0.000515176	0.000897668	0.000759526
NM_020008	225	41	417	29	410	224.25	77	599	13	434	280.75		233	1114	112	1113	643	230	1479	101	972	695.5						0.00732535	0.0442346	0.00391046	0.0580326	0.0283758	0.00792426	0.0200428	0.00259948	0.0301347	0.0151753		0.000337258	0.00141147	0.000234492	0.00145032	0.000858386	0.000259116	0.00116588	0.000232289	0.00103749	0.000673694
NM_009277	443	115	91	112	151	117.25	171	230	90	174	166.25		818	310	489	1182	699.75	796	734	382	870	695.5						0.0205467	0.00965312	0.0151025	0.021373	0.0166688	0.017598	0.00769591	0.0179964	0.0120817	0.013843		0.00118402	0.00039278	0.00102381	0.00154023	0.00103521	0.000896767	0.000578602	0.000878559	0.000928622	0.000820637
NM_001082552	443	115	91	112	151	117.25	171	230	90	174	166.25		818	310	489	1182	699.75	796	734	382	870	695.5						0.0205467	0.00965312	0.0151025	0.021373	0.0166688	0.017598	0.00769591	0.0179964	0.0120817	0.013843		0.00118402	0.00039278	0.00102381	0.00154023	0.00103521	0.000896767	0.000578602	0.000878559	0.000928622	0.000820637
NM_019946	136	94	99	68	157	104.5	151	252	36	237	169		429	327	352	555	415.75	797	704	393	889	695.75						0.0167947	0.0105018	0.00916936	0.0222222	0.014672	0.0155398	0.00843204	0.00719856	0.016456	0.0119066		0.000620961	0.000414319	0.000736974	0.000723205	0.000623865	0.000897894	0.000554953	0.000903858	0.000948902	0.000826402
NM_133753	442	953	2448	409	876	1171.5	188	338	57	146	182.25		5066	10342	1783	6839	6007.5	563	1093	178	949	695.75						0.17027	0.25968	0.055151	0.123992	0.152273	0.0193475	0.0113096	0.0113977	0.0101375	0.0130481		0.00733284	0.0131036	0.00373302	0.00891171	0.0082703	0.000634271	0.000861597	0.000409381	0.00101295	0.000729548
NM_212446	252	101	133	103	136	118.25	230	364	77	211	220.5		332	604	239	629	451	702	768	308	1012	697.5						0.0180454	0.0141084	0.0138889	0.0192498	0.0163231	0.0236699	0.0121796	0.0153969	0.0146507	0.0164743		0.000480557	0.000765287	0.000500388	0.000819633	0.000641466	0.000790867	0.000605404	0.000708367	0.00108019	0.000796207
NM_178377	183	182	289	188	198	214.25	389	707	133	343	393		287	669	198	693	461.75	475	1348	186	781	697.5						0.0325174	0.0306566	0.0253506	0.0280255	0.0291375	0.0400329	0.0236566	0.0265947	0.0238161	0.0285251		0.000415421	0.000847644	0.000414548	0.000903029	0.000645161	0.000535131	0.00106261	0.00042778	0.000833625	0.000714786
NM_144538	364	76	184	74	190	131	421	467	55	315	314.5		255	387	176	429	311.75	1018	572	175	1026	697.75						0.0135787	0.0195184	0.00997843	0.0268931	0.0174922	0.0433261	0.015626	0.0109978	0.021872	0.0229555		0.000369103	0.000490341	0.000368487	0.000559018	0.000446737	0.00114687	0.0004509	0.000402481	0.00109513	0.000773846
NM_010888	97	62	282	58	145	136.75	120	616	58	229	255.75		545	618	422	288	468.25	803	976	451	565	698.75						0.0110774	0.0299141	0.00782093	0.0205237	0.017334	0.0123495	0.0206117	0.0115977	0.0159006	0.0151148		0.000788866	0.000783026	0.000883531	0.000375285	0.000707677	0.000904653	0.000769367	0.00103725	0.000603071	0.000828586
NM_001037754	463	67	260	58	132	129.25	219	547	41	196	250.75		360	674	213	509	439	703	964	183	949	699.75						0.0119707	0.0275804	0.00782093	0.0186837	0.0165139	0.0225378	0.0183029	0.00819836	0.0136092	0.0156621		0.000521086	0.00085398	0.000445953	0.000663264	0.000621071	0.000791994	0.000759908	0.00042088	0.00101295	0.000746432
NM_029887	292	162	341	155	245	225.75	264	607	139	267	319.25		377	588	329	502	449	638	934	425	805	700.5						0.0289441	0.0361727	0.0209008	0.034678	0.0301739	0.0271689	0.0203105	0.0277944	0.0185391	0.0234532		0.000545693	0.000745015	0.000688819	0.000654142	0.000658417	0.000718766	0.000736259	0.000977454	0.000859242	0.00082293
NM_001110201	289	162	340	155	245	225.5	264	608	139	267	319.5		377	588	330	502	449.25	639	934	425	805	700.75						0.0289441	0.0360666	0.0209008	0.034678	0.0301474	0.0271689	0.020344	0.0277944	0.0185391	0.0234616		0.000545693	0.000745015	0.000690913	0.000654142	0.000658941	0.000719892	0.000736259	0.000977454	0.000859242	0.000823212
NM_146253	404	91	138	90	99	104.5	160	277	80	143	165		303	1236	186	1135	715	460	1337	171	838	701.5						0.0162587	0.0146388	0.0121359	0.0140127	0.0142615	0.016466	0.00926855	0.0159968	0.00992918	0.0129151		0.000438581	0.00156605	0.000389424	0.00147899	0.000968261	0.000518232	0.00105394	0.000393282	0.000894466	0.00071498
NM_009101	199	74	151	109	133	116.75	160	327	121	144	188		359	472	280	506	404.25	744	792	473	799	702						0.0132214	0.0160178	0.014698	0.0188252	0.0156906	0.016466	0.0109416	0.0241952	0.00999861	0.0154003		0.000519638	0.000598039	0.000586229	0.000659355	0.000590815	0.000838184	0.000624323	0.00108785	0.000852838	0.000850798
NM_203320	81	9312	17451	7818	4848	9857.25	1527	3535	5799	755	2904		1627	1590	1115	828	1290	341	426	1930	111	702						1.66375	1.85117	1.05421	0.6862	1.31383	0.157147	0.118283	1.15957	0.0524233	0.371855		0.00235502	0.00201458	0.00233445	0.00107894	0.00194575	0.000384168	0.00033581	0.00443879	0.000118479	0.00131931
NM_016849	400	151	291	77	136	163.75	225	414	87	199	231.25		678	965	379	635	664.25	512	1156	244	897	702.25						0.0269787	0.0308688	0.010383	0.0192498	0.0218701	0.0231553	0.0138526	0.0173965	0.0138175	0.0170555		0.000981378	0.00122269	0.000793503	0.000827451	0.000956255	0.000576815	0.000911259	0.000561174	0.000957441	0.000751672
NM_146224	955	68	197	95	63	105.75	104	224	40	99	116.75		587	1466	195	965	803.25	567	1215	70	960	703						0.0121494	0.0208974	0.0128101	0.0089172	0.0136935	0.0107029	0.00749515	0.0079984	0.00687405	0.00826762		0.000849659	0.00185747	0.000408267	0.00125746	0.00109322	0.000638778	0.000957768	0.000160992	0.00102469	0.000695556
NM_025375	262	40	186	54	122	100.5	176	487	54	199	229		468	406	353	403	407.5	993	866	395	562	704						0.00714669	0.0197306	0.00728155	0.0172682	0.0128568	0.0181126	0.0162953	0.0107978	0.0138175	0.0147558		0.000677412	0.000514415	0.000739067	0.000525138	0.000614008	0.00111871	0.000682656	0.000908457	0.000599868	0.000827422
NM_007478	162	215	502	319	355	347.75	616	1405	187	523	682.75		260	457	153	587	364.25	458	1109	117	1133	704.25						0.0384134	0.0532513	0.0430151	0.0502477	0.0462319	0.0633941	0.047012	0.0373925	0.0363144	0.0460282		0.00037634	0.000579034	0.000320332	0.000764904	0.000510152	0.000515979	0.000874209	0.000269087	0.00120934	0.000717155
NM_017381	311	60	140	117	118	108.75	159	475	81	236	237.75		448	431	238	410	381.75	802	953	316	748	704.75						0.01072	0.014851	0.0157767	0.0167021	0.0145124	0.0163631	0.0158937	0.0161968	0.0163866	0.01621		0.000648462	0.000546091	0.000498295	0.00053426	0.000556777	0.000903527	0.000751237	0.000726766	0.000798401	0.000794983
NM_029635	179	58	153	69	131	102.75	70	292	33	185	145		505	679	519	532	558.75	573	985	255	1006	704.75						0.0103627	0.01623	0.00930421	0.0185421	0.0136097	0.00720387	0.00977046	0.00659868	0.0128454	0.00910461		0.000730968	0.000860315	0.00108662	0.000693235	0.000842784	0.000645537	0.000776462	0.000586472	0.00107379	0.000770564
NM_019782	729	114	199	104	123	135	209	335	93	111	187		645	585	494	579	575.75	769	942	424	689	706						0.0203681	0.0211096	0.0140237	0.0174098	0.0182278	0.0215087	0.0112093	0.0185963	0.00770726	0.0147554		0.000933612	0.000741214	0.00103428	0.000754479	0.000865895	0.000866349	0.000742565	0.000975154	0.000735426	0.000829874
NM_001166477	77	271	1257	258	480	566.5	449	2628	153	893	1030.75		633	871	410	481	598.75	1036	877	238	674	706.25						0.0484188	0.13334	0.0347896	0.0679406	0.0711223	0.0462077	0.0879341	0.0305939	0.0620053	0.0566852		0.000916243	0.00110358	0.000858407	0.000626778	0.000876253	0.00116715	0.000691327	0.000547374	0.000719415	0.000781316
NM_001166542	77	271	1257	258	480	566.5	449	2628	153	893	1030.75		633	871	410	481	598.75	1036	877	238	674	706.25						0.0484188	0.13334	0.0347896	0.0679406	0.0711223	0.0462077	0.0879341	0.0305939	0.0620053	0.0566852		0.000916243	0.00110358	0.000858407	0.000626778	0.000876253	0.00116715	0.000691327	0.000547374	0.000719415	0.000781316
NM_001166541	77	271	1257	258	480	566.5	449	2628	153	893	1030.75		633	871	410	481	598.75	1036	877	238	674	706.25						0.0484188	0.13334	0.0347896	0.0679406	0.0711223	0.0462077	0.0879341	0.0305939	0.0620053	0.0566852		0.000916243	0.00110358	0.000858407	0.000626778	0.000876253	0.00116715	0.000691327	0.000547374	0.000719415	0.000781316
NM_001166540	77	271	1257	258	480	566.5	449	2628	153	893	1030.75		633	871	410	481	598.75	1036	877	238	674	706.25						0.0484188	0.13334	0.0347896	0.0679406	0.0711223	0.0462077	0.0879341	0.0305939	0.0620053	0.0566852		0.000916243	0.00110358	0.000858407	0.000626778	0.000876253	0.00116715	0.000691327	0.000547374	0.000719415	0.000781316
NM_001166537	77	271	1257	258	480	566.5	449	2628	153	893	1030.75		633	871	410	481	598.75	1036	877	238	674	706.25						0.0484188	0.13334	0.0347896	0.0679406	0.0711223	0.0462077	0.0879341	0.0305939	0.0620053	0.0566852		0.000916243	0.00110358	0.000858407	0.000626778	0.000876253	0.00116715	0.000691327	0.000547374	0.000719415	0.000781316
NM_001166539	77	271	1257	258	480	566.5	449	2628	153	893	1030.75		633	871	410	481	598.75	1036	877	238	674	706.25						0.0484188	0.13334	0.0347896	0.0679406	0.0711223	0.0462077	0.0879341	0.0305939	0.0620053	0.0566852		0.000916243	0.00110358	0.000858407	0.000626778	0.000876253	0.00116715	0.000691327	0.000547374	0.000719415	0.000781316
NM_011343	81	327	1142	377	910	689	684	2545	302	1528	1264.75		584	515	571	568	559.5	703	820	712	592	706.75						0.0584242	0.121141	0.050836	0.128804	0.0898014	0.0703921	0.0851569	0.0603879	0.106096	0.0805083		0.000845317	0.000652522	0.00119549	0.000740145	0.000858368	0.000791994	0.000646395	0.00163752	0.00063189	0.00092695
NM_148926	186	211	638	208	197	313.5	162	274	39	142	154.25		990	1189	763	655	899.25	930	601	500	798	707.25						0.0376988	0.0676779	0.0280475	0.0278839	0.040327	0.0166718	0.00916817	0.00779844	0.00985974	0.0108745		0.00143299	0.0015065	0.00159747	0.000853512	0.00134762	0.00104773	0.00047376	0.00114995	0.000851771	0.000880802
NM_007383	393	107	215	86	172	145	279	469	75	245	267		252	693	209	961	528.75	508	1028	234	1065	708.75						0.0191174	0.0228068	0.0115965	0.0243454	0.0194665	0.0287126	0.015693	0.014997	0.0170115	0.0191035		0.00036476	0.000878053	0.000437578	0.00125225	0.000733161	0.000572309	0.000810358	0.000538175	0.00113676	0.000764401
NM_001126047	815	528	727	404	252	477.75	179	197	252	92	180		2714	1748	1240	1651	1838.25	673	545	785	832	708.75						0.0943363	0.0771189	0.0544768	0.0356688	0.0654002	0.0184213	0.00659172	0.0503899	0.006388	0.0204477		0.00392841	0.00221477	0.00259616	0.00215137	0.00272268	0.000758196	0.000429616	0.00180542	0.000888062	0.000970322
NM_011851	557	58	383	92	50	145.75	154	274	32	53	128.25		441	1927	251	334	738.25	768	1341	201	530	710						0.0103627	0.040628	0.0124056	0.00707714	0.0176184	0.0158485	0.00916817	0.00639872	0.00368004	0.00877386		0.00063833	0.00244157	0.000525512	0.000435226	0.00101016	0.000865222	0.00105709	0.000462278	0.000565712	0.000737576
NM_172297	525	94	277	137	93	150.25	148	390	89	141	192		693	875	601	689	714.5	849	708	458	828	710.75						0.0167947	0.0293837	0.0184736	0.0131635	0.0194539	0.015231	0.0130496	0.0177964	0.00979031	0.0139668		0.00100309	0.00110865	0.0012583	0.000897817	0.00106696	0.000956476	0.000558107	0.00105335	0.000883792	0.000862931
NM_001177658	276	119	331	172	197	204.75	222	880	117	293	378		337	567	404	678	496.5	721	915	490	720	711.5						0.0212614	0.0351119	0.0231931	0.0278839	0.0268626	0.0228466	0.0294452	0.0233953	0.0203444	0.0240079		0.000487794	0.000718407	0.000845845	0.000883483	0.000733882	0.000812273	0.000721282	0.00112695	0.000768515	0.000857254
NM_001165955	929	96	148	91	108	110.75	132	260	56	114	140.5		306	1256	104	1027	673.25	676	1013	80	1078	711.75						0.017152	0.0156996	0.0122708	0.0152866	0.0151023	0.0135844	0.00869973	0.0111978	0.00791557	0.0103494		0.000442923	0.00159139	0.000217742	0.00133826	0.000897578	0.000761576	0.000798534	0.000183991	0.00115064	0.000723685
NM_008538	290	1263	3554	790	869	1619	864	1783	443	795	971.25		1548	2811	801	1989	1787.25	829	609	533	877	712						0.225657	0.377002	0.106526	0.123001	0.208046	0.0889163	0.05966	0.0885823	0.0552007	0.0730898		0.00224067	0.00356163	0.00167703	0.00259181	0.00251779	0.000933945	0.000480066	0.00122584	0.000936094	0.000893987
NM_019466	179	674	1116	486	668	736	238	740	64	285	331.75		3390	1798	1656	1367	2052.75	878	978	320	672	712						0.120422	0.118383	0.065534	0.0945506	0.0997224	0.0244932	0.0247608	0.0127974	0.0197889	0.0204601		0.00490689	0.00227812	0.00346713	0.0017813	0.00310836	0.000989148	0.000770944	0.000735965	0.00071728	0.000803334
NM_030116	246	77	155	88	99	104.75	161	230	66	132	147.25		557	639	618	533	586.75	800	818	469	762	712.25						0.0137574	0.0164421	0.0118662	0.0140127	0.0140196	0.0165689	0.00769591	0.0131974	0.00916539	0.0116569		0.000806236	0.000809633	0.00129389	0.000694538	0.000901075	0.000901273	0.000644818	0.00107865	0.000813345	0.000859521
NM_153566	261	73	204	59	69	101.25	70	126	34	56	71.5		358	1165	494	1111	782	387	1114	357	997	713.75						0.0130427	0.02164	0.00795577	0.00976645	0.0131012	0.00720387	0.00421602	0.00679864	0.00388835	0.00552672		0.000518191	0.00147609	0.00103428	0.00144771	0.00111907	0.000435991	0.000878151	0.000821061	0.00106418	0.000799846
NM_008037	307	1032	1886	631	485	1008.5	411	735	285	251	420.5		2425	2592	688	1063	1692	788	955	424	689	714						0.184384	0.200064	0.0850863	0.0686483	0.134546	0.042297	0.0245935	0.0569886	0.0174281	0.0353268		0.00351009	0.00328415	0.00144045	0.00138517	0.00240496	0.000887754	0.000752813	0.000975154	0.000735426	0.000837787
NM_054082	572	139	264	134	144	170.25	277	442	82	184	246.25		451	606	356	563	494	805	886	434	736	715.25						0.0248347	0.0280047	0.018069	0.0203822	0.0228227	0.0285067	0.0147895	0.0163967	0.012776	0.0181172		0.000652805	0.000767821	0.000745348	0.00073363	0.000724901	0.000906906	0.000698421	0.000998153	0.000785593	0.000847268
NM_008031	595	94	157	119	74	111	176	217	90	100	145.75		484	796	143	668	522.75	680	961	142	1079	715.5						0.0167947	0.0166543	0.0160464	0.0104742	0.0149924	0.0181126	0.00726092	0.0179964	0.00694348	0.0125783		0.000700571	0.00100856	0.000299396	0.000870452	0.000719744	0.000766082	0.000757543	0.000326585	0.0011517	0.000750479
NM_008364	551	128	198	200	143	167.25	217	405	167	157	236.5		604	750	457	752	640.75	896	846	388	733	715.75						0.0228694	0.0210035	0.0269687	0.0202406	0.0227706	0.022332	0.0135515	0.0333933	0.0109013	0.0200445		0.000874266	0.000950274	0.00095681	0.000979911	0.000940315	0.00100943	0.00066689	0.000892358	0.000782391	0.000837766
NM_025878	235	72	351	142	242	201.75	222	744	108	334	352		180	658	282	557	419.25	363	1206	258	1037	716						0.012864	0.0372335	0.0191478	0.0342534	0.0258747	0.0228466	0.0248946	0.0215957	0.0231912	0.023132		0.000260543	0.000833707	0.000590416	0.000725811	0.000602619	0.000408953	0.000950673	0.000593372	0.00110687	0.000764968
NM_026381	113	724	1168	794	833	879.75	1258	1853	517	905	1133.25		246	938	378	540	525.5	392	1306	265	901	716						0.129355	0.123899	0.107066	0.117905	0.119556	0.129464	0.0620023	0.103379	0.0628385	0.089421		0.000356075	0.00118848	0.000791409	0.000703659	0.000759905	0.000441624	0.0010295	0.000609471	0.000961711	0.000760577
NM_001081181	272	87	149	89	84	102.25	110	285	57	100	138		321	1042	379	649	597.75	516	1251	230	870	716.75						0.015544	0.0158057	0.0120011	0.0118896	0.0138101	0.0113204	0.00953624	0.0113977	0.00694348	0.00979945		0.000464635	0.00132025	0.000793503	0.000845694	0.00085602	0.000581321	0.000986146	0.000528975	0.000928622	0.000756266
NM_175334	1001	51	226	57	87	105.25	120	277	40	78	128.75		377	1861	219	1358	953.75	436	1184	124	1127	717.75						0.00911202	0.0239737	0.00768608	0.0123142	0.0132715	0.0123495	0.00926855	0.0079984	0.00541591	0.00875809		0.000545693	0.00235795	0.000458515	0.00176957	0.00128293	0.000491194	0.000933331	0.000285187	0.00120294	0.000728163
NM_029934	454	195	274	190	214	218.25	452	613	139	230	358.5		589	602	291	522	501	922	891	352	707	718						0.0348401	0.0290655	0.0256203	0.0302902	0.029954	0.0465164	0.0205113	0.0277944	0.01597	0.027698		0.000852554	0.000762753	0.000609259	0.000680204	0.000726193	0.00103872	0.000702363	0.000809562	0.000754639	0.00082632
NM_022321	312	136	173	225	152	171.5	380	478	182	259	324.75		344	401	452	501	424.5	805	763	397	908	718.25						0.0242987	0.0183515	0.0303398	0.0215145	0.0236261	0.0391067	0.0159941	0.0363927	0.0179836	0.0273693		0.000497927	0.00050808	0.000946341	0.000652839	0.000651297	0.000906906	0.000601462	0.000913057	0.000969183	0.000847652
NM_001164441	467	173	626	189	113	275.25	35	93	42	19	47.25		2756	4501	1706	2172	2783.75	522	1087	580	684	718.25						0.0309094	0.066405	0.0254854	0.0159943	0.0346985	0.00360193	0.00311182	0.00839832	0.00131926	0.00410784		0.0039892	0.00570291	0.00357181	0.00283027	0.00402355	0.000588081	0.000856867	0.00133394	0.000730089	0.000877244
NM_001190800	448	123	210	131	203	166.75	324	689	140	269	355.5		257	453	257	566	383.25	653	960	249	1012	718.5						0.0219761	0.0222764	0.0176645	0.0287332	0.0226625	0.0333436	0.0230543	0.0279944	0.018678	0.0257676		0.000371997	0.000573966	0.000538075	0.000737539	0.000555394	0.000735664	0.000756755	0.000572673	0.00108019	0.000786321
NM_009229	501	73	117	136	88	103.5	167	359	137	121	196		503	747	331	682	565.75	526	1076	358	914	718.5						0.0130427	0.0124112	0.0183387	0.0124558	0.0140621	0.0171864	0.0120123	0.0273945	0.00840161	0.0162487		0.000728073	0.000946473	0.000693006	0.000888695	0.000814062	0.000592587	0.000848196	0.000823361	0.000975587	0.000809933
NM_001122765	333	96	151	114	213	143.5	298	436	117	299	287.5		346	376	296	527	386.25	690	893	332	962	719.25						0.017152	0.0160178	0.0153722	0.0301486	0.0196727	0.0306679	0.0145888	0.0233953	0.020761	0.0223532		0.000500821	0.000476404	0.000619728	0.000686719	0.000570918	0.000777348	0.000703939	0.000763564	0.00102682	0.000817918
NM_028464	366	118	136	161	189	151	205	407	128	167	226.75		572	424	585	651	558	757	798	442	880	719.25						0.0210827	0.0144266	0.0217098	0.0267516	0.0209927	0.021097	0.0136184	0.0255949	0.0115956	0.0179765		0.000827948	0.000537222	0.0012248	0.0008483	0.000859567	0.00085283	0.000629052	0.00101655	0.000939296	0.000859433
NM_172647	281	165	448	393	126	283	147	681	310	118	314		613	1312	1134	893	988	380	1130	941	432	720.75						0.0294801	0.0475231	0.0529935	0.0178344	0.0369578	0.0151281	0.0227866	0.0619876	0.00819331	0.0270239		0.000887293	0.00166235	0.00237423	0.00116364	0.00152188	0.000428105	0.000890763	0.0021642	0.000461109	0.000986044
NM_145529	698	138	202	194	187	180.25	272	459	131	223	271.25		707	605	211	867	597.5	744	662	212	1266	721						0.0246561	0.0214278	0.0261597	0.0264685	0.024678	0.0279922	0.0153584	0.0261948	0.015484	0.0212573		0.00102335	0.000766554	0.000441765	0.00112976	0.00084036	0.000838184	0.000521845	0.000487577	0.00135131	0.000799728
NM_026768	177	66	183	85	126	115	133	463	66	158	205		450	621	426	376	468.25	497	1130	396	862	721.25						0.011792	0.0194123	0.0114617	0.0178344	0.0151251	0.0136874	0.0154922	0.0131974	0.0109707	0.0133369		0.000651357	0.000786827	0.000891906	0.000489955	0.000705011	0.000559916	0.000890763	0.000910757	0.000920083	0.00082038
NM_019783	720	119	209	112	123	140.75	216	359	102	117	198.5		659	592	519	598	592	814	933	442	697	721.5						0.0212614	0.0221704	0.0151025	0.0174098	0.018986	0.0222291	0.0120123	0.0203959	0.00812387	0.0156903		0.000953877	0.000750083	0.00108662	0.000779237	0.000892454	0.000917046	0.000735471	0.00101655	0.000743965	0.000853258
NM_001242558	1058	90	186	112	80	117	190	235	76	71	143		479	939	215	766	599.75	652	800	191	1245	722						0.01608	0.0197306	0.0151025	0.0113234	0.0155591	0.0195534	0.00786321	0.015197	0.00492987	0.0118859		0.000693334	0.00118974	0.00045014	0.000998154	0.000832843	0.000734538	0.000630629	0.000439279	0.00132889	0.000783334
NM_010478	623	331	1919	759	376	846.25	147	1010	165	234	389		1347	3562	2312	1362	2145.75	434	1227	480	750	722.75						0.0591388	0.203564	0.102346	0.0532201	0.104567	0.0151281	0.0337951	0.0329934	0.0162477	0.0245411		0.00194973	0.00451317	0.00484058	0.00177478	0.00326956	0.000488941	0.000967227	0.00110395	0.000800536	0.000840163
NM_026027	103	82	231	119	220	163	122	496	73	305	249		357	480	435	247	379.75	691	1165	395	642	723.25						0.0146507	0.0245041	0.0160464	0.0311394	0.0215851	0.0125553	0.0165964	0.0145971	0.0211776	0.0162316		0.000516744	0.000608175	0.000910749	0.000321859	0.000589382	0.000778475	0.000918353	0.000908457	0.000685259	0.000822636
NM_025485	340	106	174	100	169	137.25	252	570	100	205	281.75		426	402	365	484	419.25	569	1218	370	737	723.5						0.0189387	0.0184576	0.0134844	0.0239207	0.0187004	0.0259339	0.0190725	0.019996	0.0142341	0.0198091		0.000616618	0.000509347	0.000764191	0.000630687	0.000630211	0.000641031	0.000960132	0.00085096	0.00078666	0.000809696
NM_001042591	395	365	471	193	114	285.75	203	138	23	51	103.75		2782	2659	633	1330	1851	930	1135	95	734	723.5						0.0652135	0.0499629	0.0260248	0.0161359	0.0393343	0.0208912	0.00461755	0.00459908	0.00354117	0.00841226		0.00402684	0.00336904	0.0013253	0.00173309	0.00261356	0.00104773	0.000894705	0.00021849	0.000783458	0.000736096
NM_018858	168	230	735	257	443	416.25	560	1441	160	681	710.5		205	754	309	897	541.25	501	1064	328	1002	723.75						0.0410934	0.0779675	0.0346548	0.0627035	0.0541048	0.057631	0.0482166	0.0319936	0.0472851	0.0462816		0.000296729	0.000955342	0.000646946	0.00116886	0.000766968	0.000564422	0.000838736	0.000754365	0.00106952	0.00080676
NM_181397	535	73	155	98	135	115.25	151	318	114	173	189		313	683	396	796	547	572	969	464	890	723.75						0.0130427	0.0164421	0.0132147	0.0191083	0.0154519	0.0155398	0.0106404	0.0227954	0.0120122	0.015247		0.000453055	0.000865383	0.000829095	0.00103725	0.000796195	0.00064441	0.000763849	0.00106715	0.00094997	0.000856345
NM_178050	393	130	296	166	111	175.75	214	333	81	153	195.25		938	1922	635	1057	1138	705	997	395	800	724.25						0.0232267	0.0313992	0.022384	0.0157113	0.0231803	0.0220233	0.0111423	0.0161968	0.0106235	0.0149965		0.00135772	0.00243524	0.00132948	0.00137735	0.00162495	0.000794247	0.000785921	0.000908457	0.000853905	0.000835633
NM_011636	309	781	2448	846	543	1154.5	118	406	91	138	188.25		3493	7508	3333	3697	4507.75	361	1313	537	686	724.25						0.139539	0.25968	0.114078	0.0768577	0.147539	0.0121437	0.013585	0.0181964	0.009582	0.0133767		0.00505598	0.00951288	0.00697822	0.00481746	0.00659113	0.0004067	0.00103502	0.00123504	0.000732224	0.000852246
NM_145965	753	71	230	233	198	183	166	612	201	203	295.5		331	800	446	983	640	481	1154	346	918	724.75						0.0126854	0.024398	0.0314186	0.0280255	0.0241319	0.0170835	0.0204778	0.040192	0.0140953	0.0229621		0.00047911	0.00101363	0.000933779	0.00128092	0.000926859	0.000541891	0.000909682	0.000795763	0.000979856	0.000806798
NM_033601	429	455	1487	278	377	649.25	139	260	100	119	154.5		1008	4621	439	2006	2018.5	458	1277	236	931	725.5						0.0812936	0.157738	0.0374865	0.0533616	0.08247	0.0143048	0.00869973	0.019996	0.00826274	0.0128158		0.00145904	0.00585496	0.000919123	0.00261396	0.00271177	0.000515979	0.00100664	0.000542775	0.000993732	0.000764782
NM_011027	576	90	220	151	173	158.5	253	462	61	254	257.5		769	480	809	660	679.5	1091	635	361	816	725.75						0.01608	0.0233372	0.0203614	0.0244869	0.0210664	0.0260368	0.0154587	0.0121976	0.0176364	0.0178324		0.0011131	0.000608175	0.00169378	0.000860028	0.00106877	0.00122911	0.000500562	0.000830261	0.000870983	0.000857729
NM_001014390	580	140	251	92	51	133.5	38	58	33	16	36.25		1421	2523	681	1205	1457.5	747	1123	376	659	726.25						0.0250134	0.0266256	0.0124056	0.00721868	0.0178158	0.00391067	0.00194071	0.00659868	0.00111096	0.00339025		0.00205684	0.00319672	0.00142579	0.0015702	0.00206239	0.000841564	0.000885245	0.000864759	0.000703405	0.000823743
NM_178751	231	703	2042	502	483	932.5	182	234	155	82	163.25		1786	2025	1620	1247	1669.5	970	620	816	500	726.5						0.125603	0.216612	0.0676915	0.0683652	0.119568	0.0187301	0.00782975	0.0309938	0.00569365	0.0158118		0.00258516	0.00256574	0.00339175	0.00162493	0.0025419	0.00109279	0.000488737	0.00187671	0.000533691	0.000997984
NM_007746	448	493	1655	651	309	777	79	131	163	74	111.75		2988	6334	2444	2786	3638	514	677	930	788	727.25						0.0880829	0.17556	0.0877832	0.0437367	0.0987906	0.00813008	0.00438332	0.0325935	0.00513818	0.0125613		0.00432501	0.00802538	0.00511694	0.00363036	0.00527442	0.000579068	0.00053367	0.0021389	0.000841097	0.00102318
NM_172132	1067	81	188	105	144	129.5	280	517	105	214	279		466	543	217	749	493.75	811	911	271	918	727.75						0.014472	0.0199427	0.0141586	0.0203822	0.0172389	0.0288155	0.0172991	0.0209958	0.014859	0.0204923		0.000674517	0.000687998	0.000454328	0.000976001	0.000698211	0.000913666	0.000718129	0.000623271	0.000979856	0.00080873
NM_133859	387	52	245	178	55	132.5	112	582	119	98	227.75		169	748	685	249	462.75	383	1380	499	652	728.5						0.00929069	0.0259892	0.0240022	0.00778485	0.0167667	0.0115262	0.019474	0.0237952	0.00680461	0.0154		0.000244621	0.00094774	0.00143417	0.000324465	0.000737748	0.000431485	0.00108783	0.00114765	0.000695933	0.000840725
NM_177461	851	108	149	85	85	106.75	244	305	51	87	171.75		438	720	196	550	476	768	933	150	1063	728.5						0.0192961	0.0158057	0.0114617	0.0120311	0.0146486	0.0251106	0.0102054	0.010198	0.00604083	0.0128887		0.000633988	0.000912263	0.00041036	0.00071669	0.000668325	0.000865222	0.000735471	0.000344984	0.00113463	0.000770076
NM_145760	395	104	186	114	150	138.5	305	432	96	190	255.75		522	433	485	483	480.75	855	896	367	800	729.5						0.0185814	0.0197306	0.0153722	0.0212314	0.0187289	0.0313883	0.0144549	0.0191962	0.0131926	0.019558		0.000755575	0.000548625	0.00101543	0.000629384	0.000737254	0.000963236	0.000706304	0.00084406	0.000853905	0.000841876
NM_194068	186	96	337	101	405	234.75	314	1277	116	592	574.75		413	362	196	651	405.5	652	907	263	1099	730.25						0.017152	0.0357484	0.0136192	0.0573248	0.0309611	0.0323145	0.042729	0.0231954	0.0411054	0.0348361		0.000597801	0.000458666	0.00041036	0.0008483	0.000578782	0.000734538	0.000714975	0.000604872	0.00117305	0.000806859
NM_145991	512	193	373	252	196	253.5	339	668	197	261	366.25		615	1093	169	923	700	740	934	205	1044	730.75						0.0344828	0.0395672	0.0339806	0.0277424	0.0339432	0.0348873	0.0223516	0.0393921	0.0181225	0.0286884		0.000890188	0.00138487	0.000353831	0.00120274	0.000957905	0.000833678	0.000736259	0.000471478	0.00111435	0.00078894
NM_023057	783	150	293	187	114	186	156	266	97	129	162		1130	1014	588	791	880.75	878	863	407	775	730.75						0.0268001	0.0310809	0.0252157	0.0161359	0.0248082	0.0160543	0.00890049	0.0193961	0.00895709	0.013327		0.00163563	0.00128477	0.00123108	0.00103073	0.00129555	0.000989148	0.000680291	0.000936056	0.000827221	0.000858179
NM_178647	148	82	121	86	112	100.25	171	213	88	141	153.25		577	887	371	788	655.75	796	991	350	787	731						0.0146507	0.0128355	0.0115965	0.0158528	0.0137339	0.017598	0.00712708	0.0175965	0.00979031	0.013028		0.000835185	0.00112386	0.000776754	0.00102682	0.000940654	0.000896767	0.000781191	0.000804962	0.000840029	0.000830738
NM_172501	328	348	515	337	257	364.25	355	819	210	281	416.25		701	786	437	903	706.75	645	891	360	1029	731.25						0.0621762	0.0546303	0.0454423	0.0363765	0.0496563	0.0365339	0.0274041	0.0419916	0.0195112	0.0313602		0.00101467	0.000995887	0.000914936	0.00117667	0.00102554	0.000726652	0.000702363	0.000827961	0.00109834	0.000838828
NM_001252316	482	130	293	177	241	210.25	399	1086	180	461	531.5		411	537	430	637	503.75	774	864	494	799	732.75						0.0232267	0.0310809	0.0238673	0.0341118	0.0280717	0.0410621	0.0363381	0.0359928	0.0320094	0.0363506		0.000594906	0.000680396	0.00090028	0.000830057	0.00075141	0.000871982	0.000681079	0.00113615	0.000852838	0.000885511
NM_025985	151	73	241	101	116	132.75	156	480	93	152	220.25		223	974	101	710	502	440	1648	146	699	733.25						0.0130427	0.0255649	0.0136192	0.016419	0.0171614	0.0160543	0.016061	0.0185963	0.0105541	0.0153164		0.000322784	0.00123409	0.000211461	0.000925181	0.000673379	0.0004957	0.0012991	0.000335784	0.0007461	0.00071917
NM_175094	482	88	201	68	135	123	178	375	73	153	194.75		522	560	467	582	532.75	868	832	377	856	733.25						0.0157227	0.0213217	0.00916936	0.0191083	0.0163305	0.0183184	0.0125477	0.0145971	0.0106235	0.0140217		0.000755575	0.000709538	0.000977746	0.000758388	0.000800312	0.000977882	0.000655854	0.000867059	0.000913679	0.000853618
NM_144541	364	138	218	228	242	206.5	355	777	163	306	400.25		335	591	251	654	457.75	660	1080	298	896	733.5						0.0246561	0.0231251	0.0307443	0.0342534	0.0281947	0.0365339	0.0259988	0.0325935	0.021247	0.0290933		0.000484899	0.000748816	0.000525512	0.000852209	0.000652859	0.000743551	0.000851349	0.000685368	0.000956374	0.00080916
NM_016791	684	114	429	83	142	192	243	566	44	176	257.25		363	1534	104	963	741	446	1299	49	1141	733.75						0.0203681	0.0455076	0.011192	0.0200991	0.0242917	0.0250077	0.0189386	0.00879824	0.0122205	0.0162413		0.000525428	0.00194363	0.000217742	0.00125486	0.000985414	0.00050246	0.00102398	0.000112695	0.00121788	0.000714255
NM_145605	565	136	221	111	156	156	252	473	96	159	245		638	652	471	756	629.25	1052	775	362	749	734.5						0.0242987	0.0234433	0.0149676	0.0220807	0.0211976	0.0259339	0.0158268	0.0191962	0.0110401	0.0179993		0.00092348	0.000826105	0.000986121	0.000985123	0.000930207	0.00118517	0.000610922	0.000832561	0.000799469	0.000857032
NM_013760	203	120	350	183	179	208	136	440	77	221	218.5		333	1300	242	934	702.25	458	1298	125	1057	734.5						0.0214401	0.0371274	0.0246764	0.0253362	0.027145	0.0139961	0.0147226	0.0153969	0.0153451	0.0148652		0.000482004	0.00164714	0.000506669	0.00121707	0.000963221	0.000515979	0.0010232	0.000287487	0.00112822	0.000738721
NM_001172097	285	105	272	128	90	148.75	126	242	66	82	129		485	995	395	772	661.75	705	1162	264	809	735						0.0187601	0.0288533	0.01726	0.0127389	0.019403	0.012967	0.00809744	0.0131974	0.00569365	0.00998885		0.000702018	0.0012607	0.000827002	0.00100597	0.000948922	0.000794247	0.000915988	0.000607172	0.000863512	0.00079523
NM_001171052	567	138	269	140	144	172.75	287	436	83	188	248.5		450	600	347	558	488.75	832	914	442	753	735.25						0.0246561	0.0285351	0.0188781	0.0203822	0.0231128	0.0295359	0.0145888	0.0165967	0.0130537	0.0184438		0.000651357	0.000760219	0.000726505	0.000727114	0.000716299	0.000937324	0.000720493	0.00101655	0.000803738	0.000869527
NM_001141948	295	76	102	103	122	100.75	199	298	77	153	181.75		570	291	504	575	485	971	730	507	734	735.5						0.0135787	0.01082	0.0138889	0.0172682	0.013889	0.0204796	0.00997122	0.0153969	0.0106235	0.0141178		0.000825053	0.000368706	0.00105521	0.000749267	0.000749559	0.00109392	0.000575449	0.00116605	0.000783458	0.000904718
NM_001141949	295	76	102	103	122	100.75	199	298	77	153	181.75		570	291	504	575	485	971	730	507	734	735.5						0.0135787	0.01082	0.0138889	0.0172682	0.013889	0.0204796	0.00997122	0.0153969	0.0106235	0.0141178		0.000825053	0.000368706	0.00105521	0.000749267	0.000749559	0.00109392	0.000575449	0.00116605	0.000783458	0.000904718
NM_019401	295	76	102	103	122	100.75	199	298	77	153	181.75		570	291	504	575	485	971	730	507	734	735.5						0.0135787	0.01082	0.0138889	0.0172682	0.013889	0.0204796	0.00997122	0.0153969	0.0106235	0.0141178		0.000825053	0.000368706	0.00105521	0.000749267	0.000749559	0.00109392	0.000575449	0.00116605	0.000783458	0.000904718
NM_001164109	698	114	431	81	143	192.25	242	565	44	174	256.25		363	1538	104	968	743.25	447	1299	49	1148	735.75						0.0203681	0.0457197	0.0109223	0.0202406	0.0243127	0.0249048	0.0189052	0.00879824	0.0120817	0.0161725		0.000525428	0.0019487	0.000217742	0.00126137	0.00098831	0.000503587	0.00102398	0.000112695	0.00122535	0.000716405
NM_001164251	265	234	420	236	164	263.5	254	394	116	184	237		502	717	510	329	514.5	781	978	386	804	737.25						0.0418081	0.0445529	0.0318231	0.023213	0.0353493	0.0261398	0.0131834	0.0231954	0.012776	0.0188236		0.000726625	0.000908462	0.00106777	0.000428711	0.000782893	0.000879868	0.000770944	0.000887758	0.000858175	0.000849186
NM_023750	540	101	209	139	140	147.25	124	309	63	139	158.75		446	853	295	906	625	562	1158	218	1014	738						0.0180454	0.0221704	0.0187433	0.019816	0.0196937	0.0127611	0.0103393	0.0125975	0.00965144	0.0113373		0.000645568	0.00108078	0.000617634	0.00118058	0.000881141	0.000633145	0.000912835	0.000501376	0.00108233	0.00078242
NM_001177576	304	48	96	92	164	100	139	394	48	173	188.5		209	829	186	1299	630.75	427	1310	95	1121	738.25						0.00857602	0.0101835	0.0124056	0.023213	0.0135945	0.0143048	0.0131834	0.00959808	0.0120122	0.0122746		0.000302519	0.00105037	0.000389424	0.00169269	0.000858751	0.000481055	0.00103265	0.00021849	0.00119653	0.000732184
NM_026646	304	48	96	92	164	100	139	394	48	173	188.5		209	829	186	1299	630.75	427	1310	95	1121	738.25						0.00857602	0.0101835	0.0124056	0.023213	0.0135945	0.0143048	0.0131834	0.00959808	0.0120122	0.0122746		0.000302519	0.00105037	0.000389424	0.00169269	0.000858751	0.000481055	0.00103265	0.00021849	0.00119653	0.000732184
NM_177699	1178	99	220	93	171	145.75	332	540	72	277	305.25		380	627	175	777	489.75	793	803	90	1268	738.5						0.017688	0.0233372	0.0125405	0.0242038	0.0194424	0.0341669	0.0180687	0.0143971	0.0192334	0.0214665		0.000550035	0.000794429	0.000366393	0.00101249	0.000680836	0.000893387	0.000632994	0.00020699	0.00135344	0.000771703
NM_011489	767	212	495	171	271	287.25	236	450	130	185	250.25		463	1037	335	901	684	479	1084	291	1103	739.25						0.0378774	0.0525088	0.0230583	0.0383581	0.0379506	0.0242873	0.0150572	0.0259948	0.0128454	0.0195462		0.000670174	0.00131391	0.000701381	0.00117407	0.000964884	0.000539637	0.000854502	0.000669269	0.00117732	0.000810183
NM_001113563	767	212	495	171	271	287.25	236	450	130	185	250.25		463	1037	335	901	684	479	1084	291	1103	739.25						0.0378774	0.0525088	0.0230583	0.0383581	0.0379506	0.0242873	0.0150572	0.0259948	0.0128454	0.0195462		0.000670174	0.00131391	0.000701381	0.00117407	0.000964884	0.000539637	0.000854502	0.000669269	0.00117732	0.000810183
NM_001165956	932	95	160	92	112	114.75	148	271	62	125	151.5		326	1335	106	1083	712.5	727	999	81	1152	739.75						0.0169734	0.0169725	0.0124056	0.0158528	0.0155511	0.015231	0.00906779	0.0123975	0.00867935	0.0113439		0.000471872	0.00169149	0.00022193	0.00141123	0.000949129	0.000819032	0.000787498	0.000186291	0.00122962	0.000755611
NM_019809	318	206	554	240	308	327	209	525	102	285	280.25		790	1389	430	725	833.5	724	963	367	906	740						0.0368054	0.0587674	0.0323625	0.0435952	0.0428826	0.0215087	0.0175668	0.0203959	0.0197889	0.0198151		0.00114349	0.00175991	0.00090028	0.000944728	0.0011871	0.000815652	0.000759119	0.00084406	0.000967048	0.00084647
NM_018734	601	414	256	403	433	376.5	218	268	203	169	214.5		2598	753	1205	1849	1601.25	750	650	637	926	740.75						0.0739682	0.027156	0.054342	0.061288	0.0541886	0.0224349	0.00896741	0.0405919	0.0117345	0.0209322		0.0037605	0.000954075	0.00252288	0.00240938	0.00241171	0.000844944	0.000512386	0.00146503	0.000988395	0.000952689
NM_001177868	1272	84	122	78	133	104.25	291	364	102	211	242		447	745	162	834	547	653	925	54	1333	741.25						0.015008	0.0129416	0.0105178	0.0188252	0.0143231	0.0299475	0.0121796	0.0203959	0.0146507	0.0192934		0.000647015	0.000943939	0.000339175	0.00108676	0.000754223	0.000735664	0.000729165	0.000124194	0.00142282	0.000752961
NM_026830	1272	84	122	78	133	104.25	291	364	102	211	242		447	745	162	834	547	653	925	54	1333	741.25						0.015008	0.0129416	0.0105178	0.0188252	0.0143231	0.0299475	0.0121796	0.0203959	0.0146507	0.0192934		0.000647015	0.000943939	0.000339175	0.00108676	0.000754223	0.000735664	0.000729165	0.000124194	0.00142282	0.000752961
NM_001039188	1272	84	122	78	133	104.25	291	364	102	211	242		447	745	162	834	547	653	925	54	1333	741.25						0.015008	0.0129416	0.0105178	0.0188252	0.0143231	0.0299475	0.0121796	0.0203959	0.0146507	0.0192934		0.000647015	0.000943939	0.000339175	0.00108676	0.000754223	0.000735664	0.000729165	0.000124194	0.00142282	0.000752961
NM_027179	274	415	745	363	687	552.5	918	1652	279	935	946		409	844	302	1048	650.75	546	1096	296	1029	741.75						0.0741469	0.0790283	0.0489482	0.0972399	0.0748408	0.0944736	0.0552767	0.0557888	0.0649215	0.0676152		0.000592011	0.00106938	0.00063229	0.00136562	0.000914824	0.000615119	0.000863962	0.000680768	0.00109834	0.000814546
NM_020611	311	83	160	121	95	114.75	137	204	87	126	138.5		514	693	573	764	636	884	773	593	720	742.5						0.0148294	0.0169725	0.0163161	0.0134466	0.0153911	0.014099	0.00682594	0.0173965	0.00874878	0.0117676		0.000743995	0.000878053	0.00119968	0.000995547	0.000954318	0.000995907	0.000609345	0.00136384	0.000768515	0.000934401
NM_015783	142	741	526	595	1299	790.25	477	1008	273	622	595		1959	508	992	1502	1240.25	810	395	793	974	743						0.132392	0.0557972	0.0802319	0.183864	0.113071	0.0490892	0.0337282	0.0545891	0.0431884	0.0451487		0.00283558	0.000643652	0.00207693	0.00195721	0.00187834	0.000912539	0.000311373	0.00182381	0.00103963	0.00102184
NM_028758	584	70	179	91	128	117	229	452	88	222	247.75		358	449	352	590	437.25	732	907	303	1032	743.5						0.0125067	0.018988	0.0122708	0.0181175	0.0154707	0.0235669	0.0151241	0.0175965	0.0154145	0.0179255		0.000518191	0.000568897	0.000736974	0.000768813	0.000648219	0.000824665	0.000714975	0.000696867	0.00110154	0.000834511
NM_001083114	274	128	308	193	172	200.25	236	587	119	228	292.5		381	842	270	807	575	576	919	226	1253	743.5						0.0228694	0.0326721	0.0260248	0.0243454	0.0264779	0.0242873	0.0196413	0.0237952	0.0158311	0.0208888		0.000551483	0.00106684	0.000565292	0.00105158	0.000808799	0.000648917	0.000724435	0.000519776	0.00133743	0.000807639
NM_023908	691	370	466	265	226	331.75	261	355	216	95	231.75		1359	1076	535	991	990.25	873	797	788	521	744.75						0.0661068	0.0494325	0.0357335	0.0319887	0.0458154	0.0268601	0.0118785	0.0431914	0.00659631	0.0221316		0.0019671	0.00136333	0.00112012	0.00129134	0.00143547	0.000983515	0.000628264	0.00181232	0.000556106	0.00099505
NM_007483	177	868	4037	919	1044	1717	408	699	131	398	409		2601	4705	1604	2579	2872.25	712	1095	231	944	745.5						0.155083	0.428238	0.123921	0.147771	0.213753	0.0419883	0.0233889	0.0261948	0.0276351	0.0298017		0.00376485	0.00596139	0.00335826	0.00336062	0.00411128	0.000802133	0.000863173	0.000531275	0.00100761	0.000801047
NM_008478	1240	313	275	524	134	311.5	546	419	316	145	356.5		909	579	1001	369	714.5	1339	465	726	454	746						0.0559228	0.0291715	0.070658	0.0189667	0.0436798	0.0561902	0.0140199	0.0631874	0.010068	0.0358664		0.00131574	0.000733612	0.00209577	0.000480834	0.00115649	0.00150851	0.000366553	0.00166972	0.000484591	0.00100734
NM_145943	429	502	1286	498	368	663.5	301	708	300	210	379.75		2164	1748	1296	801	1502.25	767	720	813	685	746.25						0.0896909	0.136417	0.0671521	0.0520878	0.0863369	0.0309766	0.02369	0.059988	0.0145813	0.032309		0.00313231	0.00221477	0.0027134	0.00104376	0.00227606	0.000864096	0.000567566	0.00186981	0.000731156	0.00100816
NM_023764	255	174	483	183	201	260.25	237	517	114	185	263.25		444	756	417	626	560.75	643	1008	381	960	748						0.0310881	0.0512358	0.0246764	0.0284501	0.0338626	0.0243902	0.0172991	0.0227954	0.0128454	0.0193325		0.000642673	0.000957876	0.000873063	0.000815723	0.000822334	0.000724398	0.000794592	0.000876259	0.00102469	0.000854984
NM_023585	126	133	363	220	191	226.75	385	872	194	326	444.25		376	752	178	537	460.75	479	1306	172	1037	748.5						0.0237627	0.0385064	0.0296656	0.0270347	0.0297424	0.0396213	0.0291775	0.0387922	0.0226357	0.0325567		0.000544245	0.000952808	0.000372674	0.00069975	0.000642369	0.000539637	0.0010295	0.000395581	0.00110687	0.000767899
NM_153421	962	96	156	91	114	114.25	137	266	58	121	145.5		326	1335	106	1082	712.25	702	1052	80	1160	748.5						0.017152	0.0165482	0.0122708	0.0161359	0.0155267	0.014099	0.00890049	0.0115977	0.00840161	0.0107497		0.000471872	0.00169149	0.00022193	0.00140992	0.000948804	0.000790867	0.000829277	0.000183991	0.00123816	0.000760575
NM_175021	668	209	583	164	168	281	236	499	145	141	255.25		459	1170	184	1043	714	571	1012	189	1222	748.5						0.0373414	0.0618436	0.0221143	0.0237792	0.0362697	0.0242873	0.0166968	0.0289942	0.00979031	0.0199422		0.000664385	0.00148243	0.000385236	0.0013591	0.000972788	0.000643284	0.000797746	0.00043468	0.00130434	0.000795012
NM_177083	270	119	107	66	234	131.5	493	455	51	388	346.75		218	371	176	844	402.25	778	777	105	1337	749.25						0.0212614	0.0113504	0.00889968	0.033121	0.0186581	0.0507358	0.0152245	0.010198	0.0269407	0.0257748		0.000315546	0.000470069	0.000368487	0.00109979	0.000563474	0.000876488	0.000612498	0.000241489	0.00142709	0.000789391
NM_175103	67	42	224	64	127	114.25	42	243	14	128	106.75		608	298	1039	206	537.75	1083	615	984	315	749.25						0.00750402	0.0237615	0.00862999	0.0179759	0.0144679	0.00432232	0.0081309	0.00279944	0.00888765	0.00603508		0.000880056	0.000377576	0.00217533	0.000268433	0.000925348	0.0012201	0.000484796	0.00226309	0.000336225	0.00107605
NM_028779	779	99	225	120	182	156.5	201	601	84	254	285		457	820	330	940	636.75	498	1081	297	1123	749.75						0.017688	0.0238676	0.0161812	0.0257608	0.0208744	0.0206854	0.0201098	0.0167966	0.0176364	0.0188071		0.00066149	0.00103897	0.000690913	0.00122489	0.000904064	0.000561043	0.000852137	0.000683068	0.00119867	0.000823729
NM_019542	324	72	134	116	126	112	148	490	97	203	234.5		289	347	435	601	418	761	983	441	815	750						0.012864	0.0142145	0.0156419	0.0178344	0.0151387	0.015231	0.0163956	0.0193961	0.0140953	0.0162795		0.000418316	0.00043966	0.000910749	0.000783147	0.000637968	0.000857336	0.000774885	0.00101425	0.000869916	0.000879098
NM_028230	485	130	293	177	241	210.25	399	1089	183	461	533		411	551	439	667	517	774	898	494	834	750						0.0232267	0.0310809	0.0238673	0.0341118	0.0280717	0.0410621	0.0364385	0.0365927	0.0320094	0.0365257		0.000594906	0.000698135	0.000919123	0.000869149	0.000770328	0.000871982	0.000707881	0.00113615	0.000890196	0.000901551
NM_001163689	467	147	239	145	201	183	366	678	130	250	356		349	733	327	689	524.5	744	956	269	1031	750						0.0262641	0.0253527	0.0195523	0.0284501	0.0249048	0.0376659	0.0226862	0.0259948	0.0173587	0.0259264		0.000505164	0.000928735	0.000684632	0.000897817	0.000754087	0.000838184	0.000753601	0.000618671	0.00110047	0.000827732
NM_026861	326	105	146	141	116	127	183	267	111	110	167.75		528	711	539	740	629.5	769	1015	482	734	750						0.0187601	0.0154874	0.0190129	0.016419	0.0174198	0.018833	0.00893395	0.0221956	0.00763783	0.0144001		0.000764259	0.00090086	0.00112849	0.000964274	0.000939471	0.000866349	0.00080011	0.00110855	0.000783458	0.000889616
NM_031406	895	106	138	125	157	131.5	287	410	87	177	240.25		593	398	396	679	516.5	979	850	337	835	750.25						0.0189387	0.0146388	0.0168554	0.0222222	0.0181638	0.0295359	0.0137188	0.0173965	0.01229	0.0182353		0.000858344	0.000504279	0.000829095	0.000884786	0.000769126	0.00110293	0.000670043	0.000775064	0.000891264	0.000859826
NM_144897	263	127	227	117	205	169	312	646	96	296	337.5		432	514	412	523	470.25	778	1133	348	746	751.25						0.0226907	0.0240798	0.0157767	0.0290163	0.0228909	0.0321087	0.0216155	0.0191962	0.0205527	0.0233683		0.000625303	0.000651254	0.000862594	0.000681507	0.000705165	0.000876488	0.000893128	0.000800362	0.000796267	0.000841561
NM_001099628	1441	99	167	106	108	120	212	344	91	143	197.5		764	1451	260	1323	949.5	830	975	162	1038	751.25						0.017688	0.0177151	0.0142934	0.0152866	0.0162458	0.0218174	0.0115104	0.0181964	0.00992918	0.0153633		0.00110586	0.00183846	0.000544356	0.00172396	0.00130316	0.000935071	0.000768579	0.000372583	0.00110794	0.000796044
NM_133850	181	101	226	141	143	152.75	208	284	95	126	178.25		257	525	340	564	421.5	598	1072	342	994	751.5						0.0180454	0.0239737	0.0190129	0.0202406	0.0203182	0.0214058	0.00950278	0.0189962	0.00874878	0.0146634		0.000371997	0.000665192	0.00071185	0.000734933	0.000620993	0.000673702	0.000845043	0.000786563	0.00106098	0.000841571
NM_001145779	686	94	226	165	142	156.75	263	533	112	152	265		217	717	129	780	460.75	579	1036	117	1277	752.25						0.0167947	0.0239737	0.0222492	0.0200991	0.0207792	0.027066	0.0178344	0.0223955	0.0105541	0.0194625		0.000314099	0.000908462	0.000270084	0.0010164	0.00062726	0.000652297	0.000816664	0.000269087	0.00136305	0.000775274
NM_001033175	289	99	200	149	93	135.25	195	187	61	120	140.75		329	627	332	550	459.5	690	958	359	1005	753						0.017688	0.0212157	0.0200917	0.0131635	0.0180397	0.0200679	0.00625711	0.0121976	0.00833218	0.0117137		0.000476215	0.000794429	0.0006951	0.00071669	0.000670608	0.000777348	0.000755178	0.000825661	0.00107272	0.000857727
NM_027817	198	325	873	145	274	404.25	171	323	20	147	165.25		1674	2600	783	1456	1628.25	1032	1036	194	750	753						0.0580668	0.0926063	0.0195523	0.0387827	0.0522521	0.017598	0.0108077	0.0039992	0.0102069	0.010653		0.00242305	0.00329428	0.00163935	0.00189727	0.00231349	0.00116264	0.000816664	0.000446179	0.000800536	0.000806506
NM_026036	164	210	201	174	196	195.25	370	492	112	258	308		507	656	434	842	609.75	650	939	400	1024	753.25						0.0375201	0.0213217	0.0234628	0.0277424	0.0275118	0.0380776	0.0164626	0.0223955	0.0179142	0.0237125		0.000733863	0.000831173	0.000908655	0.00109719	0.000892719	0.000732285	0.000740201	0.000919957	0.001093	0.00087136
NM_001162942	265	119	467	222	356	291	147	1099	172	402	455		181	924	176	1293	643.5	210	1402	112	1289	753.25						0.0212614	0.0495386	0.0299353	0.0503892	0.0377811	0.0151281	0.0367731	0.0343931	0.0279128	0.0285518		0.00026199	0.00117074	0.000368487	0.00168487	0.000871522	0.000236584	0.00110518	0.000257588	0.00137585	0.000743801
NM_027927	442	203	461	278	232	293.5	255	522	213	254	311		587	1239	478	1005	827.25	515	1258	519	722	753.5						0.0362694	0.0489021	0.0374865	0.0328379	0.038874	0.0262427	0.0174664	0.0425915	0.0176364	0.0259842		0.000849659	0.00156985	0.00100078	0.00130959	0.00118247	0.000580195	0.000991664	0.00119364	0.00077065	0.000884038
NM_001205188	348	484	1107	709	520	705	557	1328	331	577	698.25		584	1456	234	1300	893.5	423	1194	228	1169	753.5						0.0864749	0.117429	0.0956041	0.0736023	0.0932775	0.0573222	0.0444355	0.0661868	0.0400639	0.0520021		0.000845317	0.0018448	0.00048992	0.00169399	0.00121851	0.000476548	0.000941214	0.000524375	0.00124777	0.000797477
NM_001163687	341	88	181	80	84	108.25	100	242	89	101	133		483	958	483	881	701.25	593	1153	384	885	753.75						0.0157227	0.0192002	0.0107875	0.0118896	0.0144	0.0102912	0.00809744	0.0177964	0.00701291	0.0107995		0.000699124	0.00121382	0.00101125	0.00114801	0.00101805	0.000668069	0.000908894	0.000883159	0.000944633	0.000851189
NM_025589	87	471	1439	601	823	833.5	988	2848	562	1335	1433.25		384	572	524	523	500.75	802	1000	517	698	754.25						0.0841522	0.152647	0.081041	0.11649	0.108582	0.101677	0.0952955	0.112378	0.0926955	0.100511		0.000555825	0.000724742	0.00109709	0.000681507	0.00076479	0.000903527	0.000788286	0.00118904	0.000745032	0.000906472
NM_001167669	198	168	395	191	212	241.5	309	752	122	306	372.25		423	463	441	378	426.25	697	1000	438	883	754.5						0.0300161	0.0419009	0.0257551	0.0300071	0.0319198	0.0317999	0.0251623	0.0243951	0.021247	0.0256511		0.000612276	0.000586636	0.000923311	0.000492561	0.000653696	0.000785234	0.000788286	0.00100735	0.000942498	0.000880843
NM_175180	896	104	143	68	103	104.5	262	293	89	162	201.5		296	955	82	1083	604	769	1158	77	1015	754.75						0.0185814	0.0151692	0.00916936	0.0145789	0.0143747	0.0269631	0.00980392	0.0177964	0.0112484	0.016453		0.000428448	0.00121002	0.000171681	0.00141123	0.000805343	0.000866349	0.000912835	0.000177092	0.00108339	0.000759917
NM_026703	153	150	385	163	254	238	377	825	110	427	434.75		266	516	250	478	377.5	697	1071	317	937	755.5						0.0268001	0.0408401	0.0219795	0.0359519	0.0313929	0.038798	0.0276049	0.0219956	0.0296487	0.0295118		0.000385025	0.000653789	0.000523419	0.000622869	0.000546275	0.000785234	0.000844254	0.000729066	0.00100014	0.000839673
NM_178058	354	97	142	134	118	122.75	333	437	104	166	260		438	517	530	678	540.75	1042	817	404	759	755.5						0.0173307	0.0150631	0.018069	0.0167021	0.0167912	0.0342698	0.0146222	0.0207958	0.0115262	0.0203035		0.000633988	0.000655056	0.00110965	0.000883483	0.000820544	0.00117391	0.00064403	0.000929156	0.000810143	0.000889309
NM_172338	753	114	180	195	179	167	298	446	139	186	267.25		368	708	343	788	551.75	685	944	292	1106	756.75						0.0203681	0.0190941	0.0262945	0.0253362	0.0227732	0.0306679	0.0149234	0.0277944	0.0129149	0.0215751		0.000532666	0.000897059	0.000718131	0.00102682	0.000793669	0.000771715	0.000744142	0.000671569	0.00118052	0.000841988
NM_001162500	365	140	179	228	154	175.25	387	509	187	271	338.5		353	408	458	546	441.25	830	848	402	949	757.25						0.0250134	0.018988	0.0307443	0.0217976	0.0241358	0.0398271	0.0170314	0.0373925	0.0188168	0.028267		0.000510954	0.000516949	0.000958903	0.000711478	0.000674571	0.000935071	0.000668467	0.000924557	0.00101295	0.00088526
NM_001025561	422	79	181	67	96	105.75	115	308	57	114	148.5		461	911	322	723	604.25	563	1035	283	1150	757.75						0.0141147	0.0192002	0.00903452	0.0135881	0.0139844	0.0118349	0.0103058	0.0113977	0.00791557	0.0103635		0.000667279	0.00115427	0.000674163	0.000942121	0.000859458	0.000634271	0.000815876	0.000650869	0.00122749	0.000832126
NM_001190989	319	142	268	165	135	177.5	165	309	98	151	180.75		535	990	342	793	665	698	1104	320	910	758						0.0253707	0.028429	0.0222492	0.0191083	0.0237893	0.0169805	0.0103393	0.0195961	0.0104847	0.0143501		0.000774392	0.00125436	0.000716037	0.00103334	0.000944532	0.000786361	0.000870268	0.000735965	0.000971317	0.000840978
NM_001039967	510	168	149	92	76	121.25	101	178	40	84	100.75		2019	1695	612	1454	1445	695	1319	266	752	758						0.0300161	0.0158057	0.0124056	0.0107573	0.0172462	0.0103942	0.00595597	0.0079984	0.00583252	0.00754526		0.00292242	0.00214762	0.00128133	0.00189467	0.00206151	0.000782981	0.00103975	0.000611771	0.000802671	0.000809293
NM_001039965	510	168	149	92	76	121.25	101	178	40	84	100.75		2019	1695	612	1454	1445	695	1319	266	752	758						0.0300161	0.0158057	0.0124056	0.0107573	0.0172462	0.0103942	0.00595597	0.0079984	0.00583252	0.00754526		0.00292242	0.00214762	0.00128133	0.00189467	0.00206151	0.000782981	0.00103975	0.000611771	0.000802671	0.000809293
NM_181274	510	168	149	92	76	121.25	101	178	40	84	100.75		2019	1695	612	1454	1445	695	1319	266	752	758						0.0300161	0.0158057	0.0124056	0.0107573	0.0172462	0.0103942	0.00595597	0.0079984	0.00583252	0.00754526		0.00292242	0.00214762	0.00128133	0.00189467	0.00206151	0.000782981	0.00103975	0.000611771	0.000802671	0.000809293
NM_023731	407	284	655	372	651	490.5	609	1151	319	720	699.75		370	671	400	504	486.25	681	1004	372	978	758.75						0.0507415	0.0694813	0.0501618	0.0921444	0.0656322	0.0626737	0.038513	0.0637872	0.0499931	0.0537417		0.00053556	0.000850179	0.00083747	0.000656749	0.000719989	0.000767209	0.000791439	0.00085556	0.0010439	0.000864527
NM_008914	506	136	146	179	145	151.5	257	504	180	211	288		238	1085	214	1130	666.75	414	1305	146	1176	760.25						0.0242987	0.0154874	0.024137	0.0205237	0.0211117	0.0264485	0.0168641	0.0359928	0.0146507	0.023489		0.000344496	0.00137473	0.000448046	0.00147247	0.000909936	0.000466409	0.00102871	0.000335784	0.00125524	0.000771537
NM_025459	337	238	302	333	125	249.5	336	358	171	170	258.75		2001	740	1141	550	1108	1081	790	549	621	760.25						0.0425228	0.0320356	0.0449029	0.0176929	0.0342885	0.0345786	0.0119789	0.0341932	0.0118039	0.0231386		0.00289637	0.000937604	0.00238888	0.00071669	0.00173489	0.00121785	0.000622746	0.00126264	0.000662844	0.000941519
NM_001190817	533	352	405	444	182	345.75	332	508	233	171	311		808	1170	565	996	884.75	599	1054	291	1098	760.5						0.0628908	0.0429617	0.0598706	0.0257608	0.047871	0.0341669	0.0169979	0.0465907	0.0118734	0.0274072		0.00116955	0.00148243	0.00118293	0.00129786	0.00128319	0.000674828	0.000830854	0.000669269	0.00117199	0.000836734
NM_001165954	974	99	166	93	119	119.25	151	284	62	131	157		326	1351	106	1087	717.5	727	1066	81	1170	761						0.017688	0.017609	0.0125405	0.0168436	0.0161703	0.0155398	0.00950278	0.0123975	0.00909596	0.011634		0.000471872	0.00171176	0.00022193	0.00141644	0.0009555	0.000819032	0.000840313	0.000186291	0.00124884	0.000773618
NM_029561	319	142	268	165	135	177.5	165	309	98	151	180.75		542	990	346	793	667.75	706	1105	324	910	761.25						0.0253707	0.028429	0.0222492	0.0191083	0.0237893	0.0169805	0.0103393	0.0195961	0.0104847	0.0143501		0.000784524	0.00125436	0.000724412	0.00103334	0.000949158	0.000795374	0.000871056	0.000745165	0.000971317	0.000845728
NM_009287	666	114	142	137	71	116	280	322	131	107	210		467	422	294	669	463	1079	664	226	1077	761.5						0.0203681	0.0150631	0.0184736	0.0100495	0.0159886	0.0288155	0.0107743	0.0261948	0.00742952	0.0183035		0.000675964	0.000534688	0.000615541	0.000871756	0.000674487	0.00121559	0.000523422	0.000519776	0.00114957	0.00085209
NM_013755	314	121	225	125	183	163.5	203	480	79	322	271		338	687	333	704	515.5	693	933	289	1131	761.5						0.0216187	0.0238676	0.0168554	0.0259023	0.022061	0.0208912	0.016061	0.0157968	0.022358	0.0187768		0.000489242	0.000870451	0.000697194	0.000917363	0.000743562	0.000780728	0.000735471	0.000664669	0.00120721	0.000847019
NM_001164177	132	186	395	221	251	263.25	316	784	184	250	383.5		574	759	712	576	655.25	768	971	602	707	762						0.0332321	0.0419009	0.0298004	0.0355272	0.0351152	0.0325203	0.026233	0.0367926	0.0173587	0.0282262		0.000830842	0.000961677	0.0014907	0.00075057	0.00100845	0.000865222	0.000765426	0.00138454	0.000754639	0.000942456
NM_009949	639	66	118	92	141	104.25	245	333	72	172	205.5		335	556	252	773	479	808	877	330	1034	762.25						0.011792	0.0125172	0.0124056	0.0199575	0.0141681	0.0252135	0.0111423	0.0143971	0.0119428	0.0156739		0.000484899	0.00070447	0.000527606	0.00100728	0.000681063	0.000910286	0.000691327	0.000758964	0.00110367	0.000866063
NM_010887	156	143	460	184	356	285.75	320	1076	122	442	490		433	611	389	598	507.75	521	1318	282	928	762.25						0.0255494	0.048796	0.0248112	0.0503892	0.0373865	0.032932	0.0360035	0.0243951	0.0306902	0.0310052		0.000626751	0.000774157	0.00081444	0.000779237	0.000748646	0.000586954	0.00103896	0.00064857	0.00099053	0.000816254
NM_001164248	265	212	403	217	164	249	266	408	110	176	240		580	684	553	356	543.25	908	922	395	825	762.5						0.0378774	0.0427495	0.0292611	0.023213	0.0332753	0.0273747	0.0136519	0.0219956	0.0122205	0.0188107		0.000839527	0.00086665	0.0011578	0.000463894	0.000831968	0.00102295	0.0007268	0.000908457	0.00088059	0.000884698
NM_001039194	354	97	142	134	118	122.75	333	437	104	166	260		445	517	533	690	546.25	1061	825	403	762	762.75						0.0173307	0.0150631	0.018069	0.0167021	0.0167912	0.0342698	0.0146222	0.0207958	0.0115262	0.0203035		0.00064412	0.000655056	0.00111593	0.00089912	0.000828556	0.00119531	0.000650336	0.000926857	0.000813345	0.000896463
NM_025996	290	164	376	234	249	255.75	359	788	164	269	395		265	746	307	600	479.5	569	1060	284	1139	763						0.0293014	0.0398854	0.0315534	0.0352442	0.0339961	0.0369456	0.0263669	0.0327934	0.018678	0.028696		0.000383577	0.000945206	0.000642758	0.000781844	0.000688346	0.000641031	0.000835583	0.000653169	0.00121575	0.000836383
NM_001142706	694	123	36	156	136	112.75	160	162	453	105	220		737	175	869	864	661.25	457	460	1636	499	763						0.0219761	0.00381882	0.0210356	0.0192498	0.0165201	0.016466	0.0054206	0.0905819	0.00729065	0.0299398		0.00106678	0.000221731	0.0018194	0.00112585	0.00105844	0.000514852	0.000362612	0.00376262	0.000532623	0.00129318
NM_001164255	262	211	403	217	164	248.75	266	407	110	175	239.5		579	678	552	350	539.75	915	922	393	825	763.75						0.0376988	0.0427495	0.0292611	0.023213	0.0332306	0.0273747	0.0136184	0.0219956	0.0121511	0.018785		0.00083808	0.000859048	0.00115571	0.000456075	0.000827228	0.00103083	0.0007268	0.000903858	0.00088059	0.00088552
NM_027879	560	134	294	165	153	186.5	281	545	120	224	292.5		348	1050	195	995	647	565	1228	150	1113	764						0.0239414	0.031187	0.0222492	0.0216561	0.0247584	0.0289184	0.018236	0.0239952	0.0155534	0.0216757		0.000503716	0.00133038	0.000408267	0.00129656	0.000884731	0.000636524	0.000968015	0.000344984	0.001188	0.00078438
NM_001174170	396	254	249	365	322	297.5	63	414	394	64	233.75		1575	1111	1270	2255	1552.75	153	1421	1255	229	764.5						0.0453815	0.0264135	0.0492179	0.0455768	0.0416474	0.00648348	0.0138526	0.0787842	0.00444383	0.025891		0.00227975	0.00140767	0.00265897	0.00293843	0.0023212	0.000172369	0.00112015	0.00288636	0.00024443	0.00110583
NM_011111	396	254	249	365	322	297.5	63	414	394	64	233.75		1575	1111	1270	2255	1552.75	153	1421	1255	229	764.5						0.0453815	0.0264135	0.0492179	0.0455768	0.0416474	0.00648348	0.0138526	0.0787842	0.00444383	0.025891		0.00227975	0.00140767	0.00265897	0.00293843	0.0023212	0.000172369	0.00112015	0.00288636	0.00024443	0.00110583
NM_175400	373	100	144	131	113	122	218	320	101	147	196.5		394	461	487	420	440.5	803	867	445	945	765						0.0178667	0.0152753	0.0176645	0.0159943	0.0167002	0.0224349	0.0107074	0.020196	0.0102069	0.0158863		0.0005703	0.000584102	0.00101962	0.00054729	0.000680328	0.000904653	0.000683444	0.00102345	0.00100868	0.000905056
NM_001077267	268	303	801	583	400	521.75	677	1390	426	588	770.25		603	1106	268	802	694.75	834	983	271	972	765						0.0541361	0.0849687	0.0786138	0.0566171	0.0685839	0.0696717	0.0465101	0.085183	0.0408277	0.0605481		0.000872819	0.00140134	0.000561105	0.00104506	0.000970081	0.000939578	0.000774885	0.000623271	0.00103749	0.000843807
NM_147155	486	111	255	145	125	159	84	123	85	91	95.75		1128	2227	922	1598	1468.75	518	1011	432	1100	765.25						0.0198321	0.02705	0.0195523	0.0176929	0.0210318	0.00864464	0.00411564	0.0169966	0.00631857	0.00901886		0.00163274	0.00282168	0.00193037	0.00208231	0.00211677	0.000583575	0.000796957	0.000993553	0.00117412	0.000887051
NM_001163539	279	108	192	105	176	145.25	121	411	72	216	205		745	872	528	1016	790.25	553	1396	350	763	765.5						0.0192961	0.020367	0.0141586	0.0249115	0.0196833	0.0124524	0.0137523	0.0143971	0.0149979	0.0138999		0.00107836	0.00110485	0.00110546	0.00132392	0.00115315	0.000623005	0.00110045	0.000804962	0.000814412	0.000835707
NM_001165948	1381	156	238	140	154	172	250	305	67	132	188.5		819	1309	358	1404	972.5	804	868	194	1197	765.75						0.0278721	0.0252466	0.0188781	0.0217976	0.0234486	0.0257281	0.0102054	0.0133973	0.00916539	0.0146241		0.00118547	0.00165854	0.000749536	0.00182951	0.00135577	0.00090578	0.000684232	0.000446179	0.00127766	0.000828462
NM_008372	440	261	183	222	150	204	407	263	120	243	258.25		1548	921	563	830	965.5	1228	764	316	758	766.5						0.0466321	0.0194123	0.0299353	0.0212314	0.0293028	0.0418854	0.00880011	0.0239952	0.0168727	0.0228883		0.00224067	0.00116694	0.00117874	0.00108155	0.00141697	0.00138345	0.000602251	0.000726766	0.000809075	0.000880387
NM_201226	562	59	156	76	136	106.75	150	352	71	147	180		279	518	224	605	406.5	857	930	266	1014	766.75						0.0105414	0.0165482	0.0102481	0.0192498	0.0141469	0.0154369	0.0117781	0.0141972	0.0102069	0.0129048		0.000403842	0.000656323	0.000468983	0.000788359	0.000579377	0.000965489	0.000733106	0.000611771	0.00108233	0.000848173
NM_001115009	1287	91	206	99	127	130.75	240	515	76	194	256.25		357	706	125	913	525.25	845	932	223	1067	766.75						0.0162587	0.0218521	0.0133495	0.0179759	0.0173591	0.024699	0.0172321	0.015197	0.0134704	0.0176496		0.000516744	0.000894525	0.000261709	0.00118971	0.000715671	0.00095197	0.000734683	0.000512876	0.0011389	0.000834606
NM_001243748	321	272	543	244	283	335.5	408	840	166	281	423.75		881	1317	445	1063	926.5	708	1157	346	859	767.5						0.0485975	0.0576005	0.0329018	0.0400566	0.0447891	0.0419883	0.0281068	0.0331934	0.0195112	0.0306999		0.00127521	0.00166868	0.000931685	0.00138517	0.00131519	0.000797627	0.000912047	0.000795763	0.000916881	0.000855579
NM_008250	457	170	260	161	209	200	239	510	149	208	276.5		673	526	551	639	597.25	910	881	523	757	767.75						0.0303734	0.0275804	0.0217098	0.0295824	0.0273115	0.0245961	0.0170648	0.029794	0.0144424	0.0214743		0.000974141	0.000666459	0.00115362	0.000832663	0.00090672	0.0010252	0.00069448	0.00120284	0.000808008	0.000932633
NM_028153	649	218	272	296	206	248	453	735	242	251	420.25		591	437	753	653	608.5	948	647	712	764	767.75						0.0389494	0.0288533	0.0399137	0.0291578	0.0342186	0.0466193	0.0245935	0.0483903	0.0174281	0.0342578		0.000855449	0.000553693	0.00157654	0.000850906	0.000959147	0.00106801	0.000510021	0.00163752	0.00081548	0.00100776
NM_025295	510	88	203	82	107	120	199	355	57	131	185.5		512	905	469	654	635	877	1026	350	821	768.5						0.0157227	0.0215339	0.0110572	0.0151451	0.0158647	0.0204796	0.0118785	0.0113977	0.00909596	0.0132129		0.0007411	0.00114666	0.000981934	0.000852209	0.000930477	0.000988021	0.000808782	0.000804962	0.00087632	0.000869521
NM_007869	533	352	405	444	182	345.75	332	508	233	171	311		821	1171	565	996	888.25	599	1071	291	1113	768.5						0.0628908	0.0429617	0.0598706	0.0257608	0.047871	0.0341669	0.0169979	0.0465907	0.0118734	0.0274072		0.00118837	0.00148369	0.00118293	0.00129786	0.00128821	0.000674828	0.000844254	0.000669269	0.001188	0.000844087
NM_025811	706	77	127	118	85	101.75	170	311	80	96	164.25		435	608	386	780	552.25	713	1028	350	986	769.25						0.0137574	0.0134719	0.0159115	0.0120311	0.013793	0.0174951	0.0104062	0.0159968	0.00666574	0.012641		0.000629645	0.000770356	0.000808159	0.0010164	0.000806139	0.00080326	0.000810358	0.000804962	0.00105244	0.000867755
NM_026365	164	73	221	69	162	131.25	200	499	69	237	251.25		273	513	288	570	411	683	986	403	1006	769.5						0.0130427	0.0234433	0.00930421	0.0229299	0.01718	0.0205825	0.0166968	0.0137972	0.016456	0.0168831		0.000395157	0.000649987	0.000602978	0.000742751	0.000597719	0.000769462	0.00077725	0.000926857	0.00107379	0.000886839
NM_172683	1390	158	240	141	158	174.25	250	305	68	132	188.75		819	1317	358	1404	974.5	806	881	194	1197	769.5						0.0282294	0.0254588	0.0190129	0.0223638	0.0237662	0.0257281	0.0102054	0.0135973	0.00916539	0.0146741		0.00118547	0.00166868	0.000749536	0.00182951	0.0013583	0.000908033	0.00069448	0.000446179	0.00127766	0.000831587
NM_178601	272	152	373	158	253	234	297	927	141	367	433		378	687	405	720	547.5	566	1074	361	1078	769.75						0.0271574	0.0395672	0.0213053	0.0358103	0.0309601	0.030565	0.0310179	0.0281944	0.0254826	0.0288149		0.00054714	0.000870451	0.000847938	0.000938212	0.000800935	0.000637651	0.000846619	0.000830261	0.00115064	0.000866292
NM_026660	437	171	282	152	175	195	297	517	109	195	279.5		610	667	640	675	648	863	941	421	854	769.75						0.0305521	0.0299141	0.0204962	0.02477	0.0264331	0.030565	0.0172991	0.0217956	0.0135398	0.0207999		0.000882951	0.00084511	0.00133995	0.000879574	0.000986897	0.000972249	0.000741777	0.000968255	0.000911544	0.000898456
NM_009458	133	338	1034	272	323	491.75	288	849	153	325	403.75		491	1348	354	886	769.75	660	1372	337	714	770.75						0.0603895	0.109685	0.0366775	0.0457183	0.0631176	0.0296388	0.028408	0.0305939	0.0225663	0.0278017		0.000710703	0.00170796	0.000741161	0.00115452	0.00107859	0.000743551	0.00108153	0.000775064	0.000762111	0.000840563
NM_030153	706	105	162	139	142	137	320	515	134	193	290.5		458	645	241	717	515.25	889	968	258	969	771						0.0187601	0.0171847	0.0187433	0.0200991	0.0186968	0.032932	0.0172321	0.0267946	0.0134009	0.0225899		0.000662937	0.000817236	0.000504576	0.000934303	0.000729763	0.00100154	0.000763061	0.000593372	0.00103429	0.000848066
NM_198109	1023	56	252	94	64	116.5	81	144	43	42	77.5		389	1588	218	909	776	633	1127	187	1137	771						0.0100054	0.0267317	0.0126753	0.00905874	0.0146178	0.00833591	0.00481831	0.00859828	0.00291626	0.00616719		0.000563062	0.00201205	0.000456421	0.00118449	0.00105401	0.000713133	0.000888398	0.00043008	0.00121361	0.000811306
NM_001177867	1045	92	94	112	110	102	258	281	80	182	200.25		515	498	83	710	451.5	830	957	144	1155	771.5						0.0164374	0.00997136	0.0151025	0.0155697	0.0142702	0.0265514	0.0094024	0.0159968	0.0126371	0.0161469		0.000745442	0.000630982	0.000173775	0.000925181	0.000618845	0.000935071	0.00075439	0.000331184	0.00123283	0.000813368
NM_001160378	428	123	62	126	140	112.75	133	238	83	127	145.25		770	387	312	1324	698.25	940	818	218	1112	772						0.0219761	0.00657685	0.0169903	0.019816	0.0163398	0.0136874	0.00796359	0.0165967	0.00881822	0.0117665		0.00111454	0.000490341	0.000653227	0.00172527	0.000995845	0.001059	0.000644818	0.000501376	0.00118693	0.00084803
NM_152817	828	61	150	134	173	129.5	211	474	90	191	241.5		230	681	393	935	559.75	531	1173	303	1085	773						0.0108987	0.0159117	0.018069	0.0244869	0.0173416	0.0217145	0.0158603	0.0179964	0.013262	0.0172083		0.000332916	0.000862849	0.000822814	0.00121837	0.000809238	0.00059822	0.00092466	0.000696867	0.00115811	0.000844464
NM_001164111	794	118	425	90	147	195	265	581	45	184	268.75		373	1619	106	980	769.5	470	1376	49	1197	773						0.0210827	0.0450833	0.0121359	0.0208068	0.0247772	0.0272718	0.0194405	0.0089982	0.012776	0.0171216		0.000539903	0.00205132	0.00022193	0.00127701	0.00102254	0.000529498	0.00108468	0.000112695	0.00127766	0.000751133
NM_007828	429	88	204	103	122	129.25	218	386	96	163	215.75		453	614	477	688	558	929	863	423	879	773.5						0.0157227	0.02164	0.0138889	0.0172682	0.0171299	0.0224349	0.0129157	0.0191962	0.0113179	0.0164662		0.0006557	0.000777958	0.000998683	0.000896514	0.000832214	0.0010466	0.000680291	0.000972854	0.000938228	0.000909494
NM_001190474	429	88	204	103	122	129.25	218	386	96	163	215.75		453	614	477	688	558	929	863	423	879	773.5						0.0157227	0.02164	0.0138889	0.0172682	0.0171299	0.0224349	0.0129157	0.0191962	0.0113179	0.0164662		0.0006557	0.000777958	0.000998683	0.000896514	0.000832214	0.0010466	0.000680291	0.000972854	0.000938228	0.000909494
NM_001190473	429	88	204	103	122	129.25	218	386	96	163	215.75		453	614	477	688	558	929	863	423	879	773.5						0.0157227	0.02164	0.0138889	0.0172682	0.0171299	0.0224349	0.0129157	0.0191962	0.0113179	0.0164662		0.0006557	0.000777958	0.000998683	0.000896514	0.000832214	0.0010466	0.000680291	0.000972854	0.000938228	0.000909494
NM_198831	192	95	170	89	140	123.5	196	408	86	191	220.25		365	567	455	308	423.75	761	953	454	927	773.75						0.0169734	0.0180333	0.0120011	0.019816	0.0167059	0.0201708	0.0136519	0.0171966	0.013262	0.0160703		0.000528323	0.000718407	0.000952622	0.000401346	0.000650175	0.000857336	0.000751237	0.00104415	0.000989463	0.000910547
NM_011221	305	84	238	167	81	142.5	180	305	102	103	172.5		250	1352	70	510	545.5	300	1565	90	1140	773.75						0.015008	0.0252466	0.0225189	0.011465	0.0185596	0.0185242	0.0102054	0.0203959	0.00715178	0.0140693		0.000361865	0.00171303	0.000146557	0.000664567	0.000721504	0.000337978	0.00123367	0.00020699	0.00121682	0.000748863
NM_023403	205	232	322	257	191	250.5	513	693	194	313	428.25		407	615	366	383	442.75	561	1232	352	953	774.5						0.0414508	0.0341572	0.0346548	0.0270347	0.0343244	0.0527941	0.0231881	0.0387922	0.0217331	0.0341269		0.000589117	0.000779225	0.000766285	0.000499077	0.000658426	0.000632018	0.000971168	0.000809562	0.00101721	0.000857491
NM_198429	808	118	427	88	148	195.25	264	580	45	182	267.75		373	1623	106	985	771.75	471	1376	49	1204	775						0.0210827	0.0452954	0.0118662	0.0209483	0.0247982	0.0271689	0.0194071	0.0089982	0.0126371	0.0170528		0.000539903	0.00205639	0.00022193	0.00128353	0.00102544	0.000530625	0.00108468	0.000112695	0.00128513	0.000753282
NM_011672	288	217	387	237	332	293.25	512	849	187	464	503		553	560	334	682	532.25	898	853	385	976	778						0.0387708	0.0410523	0.0319579	0.0469922	0.0396933	0.0526912	0.028408	0.0373925	0.0322177	0.0376773		0.000800446	0.000709538	0.000699288	0.000888695	0.000774492	0.00101168	0.000672408	0.000885458	0.00104176	0.000902828
NM_020520	282	145	185	103	123	139	229	307	84	138	189.5		628	764	544	667	650.75	772	1059	372	912	778.75						0.0259067	0.0196245	0.0138889	0.0174098	0.0192075	0.0235669	0.0102724	0.0167966	0.009582	0.0150545		0.000909005	0.000968013	0.00113896	0.000869149	0.000971282	0.000869729	0.000834795	0.00085556	0.000973452	0.000883384
NM_007516	287	303	820	585	421	532.25	690	1421	442	610	790.75		644	1101	284	807	709	879	986	277	974	779						0.0541361	0.0869842	0.0788835	0.0595895	0.0698983	0.0710096	0.0475473	0.0883823	0.0423552	0.0623236		0.000932165	0.001395	0.000594604	0.00105158	0.000993338	0.000990274	0.00077725	0.00063707	0.00103963	0.000861056
NM_031391	359	206	453	377	284	330	413	813	271	320	454.25		406	810	213	696	531.25	814	1011	220	1075	780						0.0368054	0.0480535	0.050836	0.0401982	0.0439733	0.0425028	0.0272034	0.0541892	0.0222191	0.0365286		0.000587669	0.0010263	0.000445953	0.000906938	0.000741714	0.000917046	0.000796957	0.000505976	0.00114744	0.000841854
NM_001081549	232	654	994	470	605	680.75	228	651	63	275	304.25		3416	1851	1666	1389	2080.5	961	1054	335	770	780						0.116848	0.105442	0.0633765	0.0856334	0.092825	0.023464	0.0217828	0.0125975	0.0190946	0.0192347		0.00494453	0.00234528	0.00348806	0.00180997	0.00314696	0.00108265	0.000830854	0.000770464	0.000821884	0.000876464
NM_020558	122	120	187	200	163	167.5	292	653	180	275	350		251	440	248	520	364.75	657	1276	373	815	780.25						0.0214401	0.0198366	0.0269687	0.0230715	0.0228292	0.0300504	0.0218497	0.0359928	0.0190946	0.0267469		0.000363313	0.000557494	0.000519231	0.000677598	0.000529409	0.000740171	0.00100585	0.00085786	0.000869916	0.00086845
NM_011937	270	80	182	68	112	110.5	296	470	70	203	259.75		182	590	105	652	382.25	678	1256	149	1039	780.5						0.0142934	0.0193062	0.00916936	0.0158528	0.0146554	0.0304621	0.0157264	0.0139972	0.0140953	0.0185702		0.000263438	0.000747549	0.000219836	0.000849603	0.000520106	0.000763829	0.000990087	0.000342684	0.00110901	0.000801402
NM_001195298	655	155	135	133	184	151.75	490	437	177	277	345.25		546	259	370	574	437.25	1610	403	400	709	780.5						0.0276934	0.0143206	0.0179342	0.0260439	0.021498	0.0504271	0.0146222	0.0353929	0.0192334	0.0299189		0.000790314	0.000328161	0.00077466	0.000747964	0.000660275	0.00181381	0.000317679	0.000919957	0.000756774	0.000952056
NM_172574	183	260	272	261	301	273.5	487	607	149	451	423.5		424	669	395	776	566	774	865	316	1169	781						0.0464535	0.0288533	0.0351942	0.0426044	0.0382763	0.0501183	0.0203105	0.029794	0.0313151	0.0328845		0.000613723	0.000847644	0.000827002	0.00101118	0.000824888	0.000871982	0.000681867	0.000726766	0.00124777	0.000882096
NM_030684	466	84	72	80	165	100.25	171	273	63	179	171.5		613	275	427	955	567.5	904	945	327	949	781.25						0.015008	0.00763764	0.0107875	0.0233546	0.0141969	0.017598	0.00913471	0.0125975	0.0124288	0.0129398		0.000887293	0.000348434	0.000893999	0.00124443	0.00084354	0.00101844	0.00074493	0.000752065	0.00101295	0.000882095
NM_172253	311	144	275	163	129	177.75	174	357	91	140	190.5		319	1559	230	1033	785.25	582	1429	199	917	781.75						0.0257281	0.0291715	0.0219795	0.018259	0.0237845	0.0179068	0.0119454	0.0181964	0.00972087	0.0144423		0.00046174	0.0019753	0.000481545	0.00134607	0.00106617	0.000655676	0.00112646	0.000457679	0.000978789	0.000804651
NM_001252436	815	88	178	121	80	116.75	211	330	114	84	184.75		706	768	322	759	638.75	926	820	252	1131	782.25						0.0157227	0.0188819	0.0163161	0.0113234	0.015561	0.0217145	0.011042	0.0227954	0.00583252	0.0153461		0.00102191	0.000973081	0.000674163	0.000989032	0.000914546	0.00104322	0.000646395	0.000579573	0.00120721	0.0008691
NM_207231	160	878	1115	308	321	655.5	139	263	51	120	143.25		3433	2289	1567	1274	2140.75	816	899	631	785	782.75						0.15687	0.118277	0.0415318	0.0454352	0.0905285	0.0143048	0.00880011	0.010198	0.00833218	0.0104088		0.00496913	0.00290024	0.00328079	0.00166011	0.00320257	0.000919299	0.000708669	0.00145123	0.000837895	0.000979274
NM_001162941	298	124	494	228	392	309.5	152	1211	174	443	495		188	952	180	1305	656.25	213	1476	116	1328	783.25						0.0221547	0.0524027	0.0307443	0.0554848	0.0401966	0.0156427	0.0405206	0.034793	0.0307596	0.030429		0.000272123	0.00120621	0.000376862	0.00170051	0.000888927	0.000239964	0.00116351	0.000266787	0.00141748	0.000771936
[truncated: 6,140 more rows]
[truncated: 2 more columns]

## Sheet: mRNA-Lysate (1B)
			flaA- normalized mRNA		dotflaA-normalized mRNA			flaA/dotflaA Ratio			flaA/dotflaA Ratio		Lysate cytokine/protein (pg/mL)										Lysate Cytokine/Protein normalized to total protein									Average of replicates					flaA/dotflaA Ratio			flaA/dotflaA Ratio			mRNA	lysate
[truncated: 21 more rows]

[truncated: 2 more sheets: mRNA-supernatants (1C), Total_Protein_Conc (1B-C)]
