# Supplementary material for: Global analysis of gene expression reveals mRNA superinduction is required for the inducible immune response to a bacterial pathogen
Source: eLife journal article supplement (doi:10.7554/elife.22707), 2017-04-06
Supplement: supp [file elife-22707-supp-v1.zip › elife_poa_e22707_Figure_3_Source_Data.xlsx]

## Sheet: 7 effector Induction (A)
		Raw Read Counts Ribosome Reads							Raw Read Counts mRNA Reads							Normalized Read Counts Ribosome Reads							Normalized Read Counts mRNA Reads								Average Normalized Ribosome Reads			Average Normalized mRNA Reads
		flaA_ribo	flaA_ribo		7flaA_ribo	7flaA_ribo			flaA_mRNA	flaA_mRNA		7flaA_mRNA	7flaA-mRNA		normalized read = read / sum mitochondrial reads (see row 7056)	flaA_ribo	flaA_ribo		7flaA_ribo	7flaA_ribo			flaA_mRNA	flaA_mRNA		7flaA_mRNA	7flaA-mRNA
Gene	Length	RVKB007A	RVKB016C	flaA_ribo_avg	RVKB007C	RVKB017C	7flaA_ribo_avg		RVKB010B	RVKB018B	flaA_mRNA_avg	RVKB010D	RVKB018D	7flaA_mRNA_avg		RVKB007A	RVKB016C	flaA_ribo_avg	RVKB007C	RVKB017C	7flaA_ribo_avg		RVKB010B	RVKB018B	flaA_mRNA_avg	RVKB010D	RVKB018D	7flaA_mRNA_avg			flaA_ribo_avg	7flaA_ribo_avg		flaA_mRNA_avg	7flaA_mRNA_avg
NM_015743	608	112	100	106	6	4	5		165	476	320.5	5	12	8.5		0.0151025	0.0141543	0.0146284	0.000996347	0.000377537	0.000686942		0.000345456	0.000620263	0.000482859	1.28624e-05	1.73108e-05	1.50866e-05			0.0146284	0.000686942		0.000482859	1.50866e-05
NM_181444	337	173	40	106.5	16	5	10.5		153	64	108.5	30	10	20		0.0233279	0.00566171	0.0144948	0.00265692	0.000471921	0.00156442		0.000320332	8.33966e-05	0.000201864	7.71742e-05	1.44257e-05	4.57999e-05			0.0144948	0.00156442		0.000201864	4.57999e-05
NM_007913	514	102	158	130	9	62	35.5		32	218	125	7	36	21.5		0.013754	0.0223638	0.0180589	0.00149452	0.00585182	0.00367317		6.69976e-05	0.00028407	0.000175534	1.80073e-05	5.19325e-05	3.49699e-05			0.0180589	0.00367317		0.000175534	3.49699e-05
NM_001190461	76	145	162	153.5	46	24	35		86	143	114.5	27	19	23		0.0195523	0.0229299	0.0212411	0.00763866	0.00226522	0.00495194		0.000180056	0.000186339	0.000183198	6.94568e-05	2.74088e-05	4.84328e-05			0.0212411	0.00495194		0.000183198	4.84328e-05
NM_001145034	104	174	115	144.5	5	10	7.5		1094	355	724.5	40	12	26		0.0234628	0.0162774	0.0198701	0.000830289	0.000943841	0.000887065		0.00229048	0.000462591	0.00137654	0.000102899	1.73108e-05	6.01049e-05			0.0198701	0.000887065		0.00137654	6.01049e-05
NM_001101502	575	100	129	114.5	57	89	73		44	330	187	38	44	41		0.0134844	0.018259	0.0158717	0.00946529	0.00840019	0.00893274		9.21217e-05	0.000430014	0.000261068	9.7754e-05	6.34731e-05	8.06135e-05			0.0158717	0.00893274		0.000261068	8.06135e-05
NM_029083	210	156	57	106.5	25	7	16		253	166	209.5	96	7	51.5		0.0210356	0.00806794	0.0145518	0.00415144	0.000660689	0.00240607		0.0005297	0.00021631	0.000373005	0.000246957	1.0098e-05	0.000128528			0.0145518	0.00240607		0.000373005	0.000128528
NM_011345	600	1622	1844	1733	34	54	44		6279	6792	6535.5	49	57	53		0.218716	0.261005	0.239861	0.00564596	0.00509674	0.00537135		0.0131462	0.00885047	0.0109983	0.000126051	8.22265e-05	0.000104139			0.239861	0.00537135		0.0109983	0.000104139
NM_009627	165	94	191	142.5	28	6	17		358	579	468.5	100	17	58.5		0.0126753	0.0270347	0.019855	0.00464962	0.000566305	0.00260796		0.000749536	0.000754479	0.000752007	0.000257247	2.45237e-05	0.000140885			0.019855	0.00260796		0.000752007	0.000140885
NM_175092	192	176	95	135.5	17	12	14.5		457	495	476	56	66	61		0.0237325	0.0134466	0.0185895	0.00282298	0.00113261	0.0019778		0.00095681	0.000645021	0.000800915	0.000144058	9.52097e-05	0.000119634			0.0185895	0.0019778		0.000800915	0.000119634
NM_018798	619	243	348	295.5	306	337	321.5		55	263	159	65	63	64		0.032767	0.0492569	0.0410119	0.0508137	0.0318075	0.0413106		0.000115152	0.000342708	0.00022893	0.000167211	9.08819e-05	0.000129046			0.0410119	0.0413106		0.00022893	0.000129046
NM_009895	238	260	316	288	50	133	91.5		208	428	318	46	82	64		0.0350593	0.0447275	0.0398934	0.00830289	0.0125531	0.010428		0.000435484	0.000557715	0.0004966	0.000118334	0.000118291	0.000118312			0.0398934	0.010428		0.0004966	0.000118312
NM_007564	319	124	310	217	136	263	199.5		16	284	150	33	112	72.5		0.0167206	0.0438783	0.0302994	0.0225839	0.024823	0.0237034		3.34988e-05	0.000370073	0.000201786	8.48916e-05	0.000161568	0.00012323			0.0302994	0.0237034		0.000201786	0.00012323
NM_013558	622	225	100	162.5	74	72	73		304	82	193	128	20	74		0.0303398	0.0141543	0.022247	0.0122883	0.00679566	0.00954197		0.000636477	0.000106852	0.000371665	0.000329277	2.88514e-05	0.000179064			0.022247	0.00954197		0.000371665	0.000179064
NM_008019	89	153	392	272.5	192	604	398		61	171	116	44	121	82.5		0.0206311	0.0554848	0.0380579	0.0318831	0.057008	0.0444456		0.000127714	0.000222825	0.00017527	0.000113189	0.000174551	0.00014387			0.0380579	0.0444456		0.00017527	0.00014387
NM_026131	169	113	97	105	52	35	43.5		279	190	234.5	141	30	85.5		0.0152373	0.0137297	0.0144835	0.008635	0.00330345	0.00596923		0.000584135	0.000247584	0.00041586	0.000362719	4.32771e-05	0.000202998			0.0144835	0.00596923		0.00041586	0.000202998
NM_009137	73	54	162	108	35	137	86		95	297	196	72	107	89.5		0.00728155	0.0229299	0.0151057	0.00581202	0.0129306	0.00937133		0.000198899	0.000387013	0.000292956	0.000185218	0.000154355	0.000169787			0.0151057	0.00937133		0.000292956	0.000169787
NM_133358	540	153	135	144	95	78	86.5		143	264	203.5	91	88	89.5		0.0206311	0.0191083	0.0198697	0.0157755	0.00736196	0.0115687		0.000299396	0.000344011	0.000321703	0.000234095	0.000126946	0.000180521			0.0198697	0.0115687		0.000321703	0.000180521
NM_013674	431	129	155	142	1	23	12		748	2298	1523	26	153	89.5		0.0173948	0.0219391	0.019667	0.000166058	0.00217084	0.00116845		0.00156607	0.00299446	0.00228026	6.68843e-05	0.000220713	0.000143799			0.019667	0.00116845		0.00228026	0.000143799
NM_022816	420	123	141	132	178	238	208		141	131	136	138	46	92		0.0165858	0.0199575	0.0182716	0.0295583	0.0224634	0.0260109		0.000295208	0.000170702	0.000232955	0.000355001	6.63582e-05	0.00021068			0.0182716	0.0260109		0.000232955	0.00021068
NM_013651	466	201	359	280	188	527	357.5		78	227	152.5	88	101	94.5		0.0271036	0.0508139	0.0389587	0.0312189	0.0497404	0.0404797		0.000163307	0.000295797	0.000229552	0.000226378	0.0001457	0.000186039			0.0389587	0.0404797		0.000229552	0.000186039
NM_019568	80	148	277	212.5	88	269	178.5		45	238	141.5	88	103	95.5		0.0199569	0.0392074	0.0295821	0.0146131	0.0253893	0.0200012		9.42154e-05	0.000310131	0.000202173	0.000226378	0.000148585	0.000187481			0.0295821	0.0200012		0.000202173	0.000187481
NM_001114087	203	175	151	163	65	47	56		297	193	245	146	45	95.5		0.0235976	0.021373	0.0224853	0.0107938	0.00443605	0.00761491		0.000621822	0.000251493	0.000436657	0.000375581	6.49157e-05	0.000220248			0.0224853	0.00761491		0.000436657	0.000220248
NM_025440	116	88	135	111.5	105	161	133		131	119	125	110	82	96		0.0118662	0.0191083	0.0154873	0.0174361	0.0151958	0.016316		0.000274271	0.000155066	0.000214669	0.000282972	0.000118291	0.000200631			0.0154873	0.016316		0.000214669	0.000200631
NM_183146	954	119	105	112	185	131	158		86	224	155	31	163	97		0.0160464	0.014862	0.0154542	0.0307207	0.0123643	0.0215425		0.000180056	0.000291888	0.000235972	7.97467e-05	0.000235139	0.000157443			0.0154542	0.0215425		0.000235972	0.000157443
NM_031252	177	135	95	115	11	3	7		2130	1903	2016.5	158	38	98		0.0182039	0.0134466	0.0158252	0.00182664	0.000283152	0.00105489		0.00445953	0.00247975	0.00346964	0.000406451	5.48177e-05	0.000230634			0.0158252	0.00105489		0.00346964	0.000230634
NM_001163239	168	95	126	110.5	51	113	82		87	260	173.5	32	167	99.5		0.0128101	0.0178344	0.0153223	0.00846895	0.0106654	0.00956718		0.00018215	0.000338799	0.000260474	8.23191e-05	0.000240909	0.000161614			0.0153223	0.00956718		0.000260474	0.000161614
NM_001085390	365	160	198	179	17	101	59		175	477	326	51	150	100.5		0.021575	0.0280255	0.0248002	0.00282298	0.0095328	0.00617789		0.000366393	0.000621566	0.000493979	0.000131196	0.000216386	0.000173791			0.0248002	0.00617789		0.000493979	0.000173791
NM_013659	804	188	88	138	43	47	45		356	400	378	127	78	102.5		0.0253506	0.0124558	0.0189032	0.00714048	0.00443605	0.00578827		0.000745348	0.000521229	0.000633289	0.000326704	0.000112521	0.000219612			0.0189032	0.00578827		0.000633289	0.000219612
NM_175102	67	49	195	122	43	347	195		124	91	107.5	130	78	104		0.00660734	0.0276008	0.0171041	0.00714048	0.0327513	0.0199459		0.000259616	0.00011858	0.000189098	0.000334421	0.000112521	0.000223471			0.0171041	0.0199459		0.000189098	0.000223471
NM_001037746	299	105	113	109	126	113	119.5		167	200	183.5	124	87	105.5		0.0141586	0.0159943	0.0150765	0.0209233	0.0106654	0.0157943		0.000349644	0.000260615	0.000305129	0.000318987	0.000125504	0.000222245			0.0150765	0.0157943		0.000305129	0.000222245
NM_010444	582	289	141	215	87	8	47.5		809	923	866	182	29	105.5		0.0389698	0.0199575	0.0294637	0.014447	0.000755073	0.00760105		0.00169378	0.00120274	0.00144826	0.00046819	4.18345e-05	0.000255012			0.0294637	0.00760105		0.00144826	0.000255012
NM_001258458	126	908	1914	1411	904	3570	2237		180	21	100.5	209	5	107		0.122438	0.270913	0.196675	0.150116	0.336951	0.243534		0.000376862	2.73645e-05	0.000202113	0.000537647	7.21285e-06	0.00027243			0.196675	0.243534		0.000202113	0.00027243
NM_001146211	181	90	124	107	100	177	138.5		105	203	154	98	119	108.5		0.0121359	0.0175513	0.0148436	0.0166058	0.016706	0.0166559		0.000219836	0.000264524	0.00024218	0.000252102	0.000171666	0.000211884			0.0148436	0.0166559		0.00024218	0.000211884
NM_025300	185	99	108	103.5	71	195	133		60	207	133.5	68	152	110		0.0133495	0.0152866	0.0143181	0.0117901	0.0184049	0.0150975		0.000125621	0.000269736	0.000197678	0.000174928	0.000219271	0.000197099			0.0143181	0.0150975		0.000197678	0.000197099
NM_133706	157	105	154	129.5	60	153	106.5		146	203	174.5	141	82	111.5		0.0141586	0.0217976	0.0179781	0.00996347	0.0144408	0.0122021		0.000305677	0.000264524	0.0002851	0.000362719	0.000118291	0.000240505			0.0179781	0.0122021		0.0002851	0.000240505
NM_025983	33	207	563	385	188	781	484.5		113	126	119.5	99	125	112		0.0279126	0.0796886	0.0538006	0.0312189	0.073714	0.0524664		0.000236585	0.000164187	0.000200386	0.000254675	0.000180321	0.000217498			0.0538006	0.0524664		0.000200386	0.000217498
NM_001046637	268	220	321	270.5	224	231	227.5		87	310	198.5	63	162	112.5		0.0296656	0.0454352	0.0375504	0.0371969	0.0218027	0.0294998		0.00018215	0.000403952	0.000293051	0.000162066	0.000233696	0.000197881			0.0375504	0.0294998		0.000293051	0.000197881
NM_015782	268	220	321	270.5	224	231	227.5		87	310	198.5	63	162	112.5		0.0296656	0.0454352	0.0375504	0.0371969	0.0218027	0.0294998		0.00018215	0.000403952	0.000293051	0.000162066	0.000233696	0.000197881			0.0375504	0.0294998		0.000293051	0.000197881
NM_175658	110	1130	2436	1783	1183	2909	2046		273	35	154	218	8	113		0.152373	0.344798	0.248586	0.196446	0.274563	0.235505		0.000571573	4.56075e-05	0.00030859	0.000560799	1.15406e-05	0.00028617			0.248586	0.235505		0.00030859	0.00028617
NM_021463	299	117	123	120	158	114	136		131	253	192	132	98	115		0.0157767	0.0174098	0.0165932	0.0262371	0.0107598	0.0184985		0.000274271	0.000329677	0.000301974	0.000339566	0.000141372	0.000240469			0.0165932	0.0184985		0.000301974	0.000240469
NM_001013769	466	138	157	147.5	64	125	94.5		79	326	202.5	87	144	115.5		0.0186084	0.0222222	0.0204153	0.0106277	0.011798	0.0112129		0.0001654	0.000424802	0.000295101	0.000223805	0.00020773	0.000215768			0.0204153	0.0112129		0.000295101	0.000215768
NM_001166544	87	199	406	302.5	138	513	325.5		135	172	153.5	99	133	116		0.0268339	0.0574664	0.0421501	0.022916	0.0484191	0.0356675		0.000282646	0.000224128	0.000253387	0.000254675	0.000191862	0.000223268			0.0421501	0.0356675		0.000253387	0.000223268
NM_001166543	87	199	406	302.5	138	513	325.5		135	172	153.5	99	133	116		0.0268339	0.0574664	0.0421501	0.022916	0.0484191	0.0356675		0.000282646	0.000224128	0.000253387	0.000254675	0.000191862	0.000223268			0.0421501	0.0356675		0.000253387	0.000223268
NM_001163554	564	179	244	211.5	283	286	284.5		17	237	127	103	134	118.5		0.024137	0.0345364	0.0293367	0.0469944	0.0269939	0.0369941		3.55925e-05	0.000308828	0.00017221	0.000264965	0.000193304	0.000229135			0.0293367	0.0369941		0.00017221	0.000229135
NM_133665	488	199	120	159.5	126	79	102.5		79	411	245	84	153	118.5		0.0268339	0.0169851	0.0219095	0.0209233	0.00745635	0.0141898		0.0001654	0.000535563	0.000350482	0.000216088	0.000220713	0.000218401			0.0219095	0.0141898		0.000350482	0.000218401
NM_025426	214	93	133	113	97	178	137.5		87	194	140.5	75	163	119		0.0125405	0.0188252	0.0156828	0.0161076	0.0168004	0.016454		0.00018215	0.000252796	0.000217473	0.000192935	0.000235139	0.000214037			0.0156828	0.016454		0.000217473	0.000214037
NM_001104556	214	93	133	113	97	178	137.5		87	194	140.5	75	163	119		0.0125405	0.0188252	0.0156828	0.0161076	0.0168004	0.016454		0.00018215	0.000252796	0.000217473	0.000192935	0.000235139	0.000214037			0.0156828	0.016454		0.000217473	0.000214037
NM_001104530	214	93	133	113	97	178	137.5		87	194	140.5	75	163	119		0.0125405	0.0188252	0.0156828	0.0161076	0.0168004	0.016454		0.00018215	0.000252796	0.000217473	0.000192935	0.000235139	0.000214037			0.0156828	0.016454		0.000217473	0.000214037
NM_001104557	214	93	133	113	97	178	137.5		87	194	140.5	75	163	119		0.0125405	0.0188252	0.0156828	0.0161076	0.0168004	0.016454		0.00018215	0.000252796	0.000217473	0.000192935	0.000235139	0.000214037			0.0156828	0.016454		0.000217473	0.000214037
NM_001163555	466	163	230	196.5	267	266	266.5		21	216	118.5	93	146	119.5		0.0219795	0.0325548	0.0272672	0.0443374	0.0251062	0.0347218		4.39672e-05	0.000281464	0.000162715	0.00023924	0.000210615	0.000224928			0.0272672	0.0347218		0.000162715	0.000224928
NM_011138	460	167	233	200	270	264	267		19	218	118.5	98	142	120		0.0225189	0.0329795	0.0277492	0.0448356	0.0249174	0.0348765		3.97798e-05	0.00028407	0.000161925	0.000252102	0.000204845	0.000228474			0.0277492	0.0348765		0.000161925	0.000228474
NM_001163556	444	172	233	202.5	271	267	269		21	217	119	98	144	121		0.0231931	0.0329795	0.0280863	0.0450017	0.0252006	0.0351011		4.39672e-05	0.000282767	0.000163367	0.000252102	0.00020773	0.000229916			0.0280863	0.0351011		0.000163367	0.000229916
NM_001185182	108	116	132	124	105	259	182		103	169	136	143	100	121.5		0.0156419	0.0186837	0.0171628	0.0174361	0.0244455	0.0209408		0.000215649	0.000220219	0.000217934	0.000367864	0.000144257	0.00025606			0.0171628	0.0209408		0.000217934	0.00025606
NM_010385	108	116	132	124	105	259	182		103	169	136	143	100	121.5		0.0156419	0.0186837	0.0171628	0.0174361	0.0244455	0.0209408		0.000215649	0.000220219	0.000217934	0.000367864	0.000144257	0.00025606			0.0171628	0.0209408		0.000217934	0.00025606
NM_016859	417	108	109	108.5	80	67	73.5		168	220	194	176	67	121.5		0.0145631	0.0154282	0.0149956	0.0132846	0.00632374	0.00980418		0.000351737	0.000286676	0.000319207	0.000452755	9.66522e-05	0.000274704			0.0149956	0.00980418		0.000319207	0.000274704
NM_175652	84	290	400	345	124	295	209.5		235	746	490.5	108	136	122		0.0391046	0.0566171	0.0478609	0.0205912	0.0278433	0.0242172		0.000492014	0.000972092	0.000732053	0.000277827	0.00019619	0.000237008			0.0478609	0.0242172		0.000732053	0.000237008
NM_001083937	371	84	124	104	110	163	136.5		260	186	223	162	83	122.5		0.0113269	0.0175513	0.0144391	0.0182664	0.0153846	0.0168255		0.000544356	0.000242371	0.000393364	0.000416741	0.000119733	0.000268237			0.0144391	0.0168255		0.000393364	0.000268237
NM_024236	222	125	221	173	106	224	165		145	242	193.5	99	147	123		0.0168554	0.031281	0.0240682	0.0176021	0.021142	0.0193721		0.000303583	0.000315344	0.000309463	0.000254675	0.000212058	0.000233366			0.0240682	0.0193721		0.000309463	0.000233366
NM_001099674	78	126	291	208.5	142	530	336		102	220	161	112	137	124.5		0.0169903	0.041189	0.0290896	0.0235802	0.0500236	0.0368019		0.000213555	0.000286676	0.000250115	0.000288117	0.000197632	0.000242875			0.0290896	0.0368019		0.000250115	0.000242875
NM_010118	451	143	485	314	18	222	120		109	1577	843	24	225	124.5		0.0192826	0.0686483	0.0439654	0.00298904	0.0209533	0.0119712		0.000228211	0.00205495	0.00114158	6.17394e-05	0.000324578	0.000193159			0.0439654	0.0119712		0.00114158	0.000193159
NM_001080964	593	139	123	131	109	275	192		26	235	130.5	24	228	126		0.0187433	0.0174098	0.0180765	0.0181003	0.0259556	0.022028		5.44356e-05	0.000306222	0.000180329	6.17394e-05	0.000328906	0.000195323			0.0180765	0.022028		0.000180329	0.000195323
NM_030220	594	139	123	131	109	275	192		26	237	131.5	24	228	126		0.0187433	0.0174098	0.0180765	0.0181003	0.0259556	0.022028		5.44356e-05	0.000308828	0.000181632	6.17394e-05	0.000328906	0.000195323			0.0180765	0.022028		0.000181632	0.000195323
NM_078484	374	83	124	103.5	111	165	138		259	200	229.5	168	86	127		0.011192	0.0175513	0.0143717	0.0184324	0.0155734	0.0170029		0.000542262	0.000260615	0.000401438	0.000432175	0.000124061	0.000278118			0.0143717	0.0170029		0.000401438	0.000278118
NM_145824	629	119	126	122.5	98	144	121		176	387	281.5	110	144	127		0.0160464	0.0178344	0.0169404	0.0162737	0.0135913	0.0149325		0.000368487	0.000504289	0.000436388	0.000282972	0.00020773	0.000245351			0.0169404	0.0149325		0.000436388	0.000245351
NM_009754	91	151	98	124.5	73	45	59		352	526	439	137	119	128		0.0203614	0.0138712	0.0171163	0.0121222	0.00424729	0.00818475		0.000736974	0.000685416	0.000711195	0.000352429	0.000171666	0.000262047			0.0171163	0.00818475		0.000711195	0.000262047
NM_001146212	182	90	124	107	100	178	139		95	200	147.5	107	150	128.5		0.0121359	0.0175513	0.0148436	0.0166058	0.0168004	0.0167031		0.000198899	0.000260615	0.000229757	0.000275255	0.000216386	0.00024582			0.0148436	0.0167031		0.000229757	0.00024582
NM_019870	216	91	119	105	87	115	101		119	222	170.5	179	78	128.5		0.0122708	0.0168436	0.0145572	0.014447	0.0108542	0.0126506		0.000249147	0.000289282	0.000269215	0.000460473	0.000112521	0.000286497			0.0145572	0.0126506		0.000269215	0.000286497
NM_134133	41	70	131	100.5	43	74	58.5		177	230	203.5	126	131	128.5		0.00943905	0.0185421	0.0139906	0.00714048	0.00698443	0.00706246		0.000370581	0.000299707	0.000335144	0.000324132	0.000188977	0.000256554			0.0139906	0.00706246		0.000335144	0.000256554
NM_148932	1181	146	122	134	95	184	139.5		39	436	237.5	61	198	129.5		0.0196872	0.0172682	0.0184777	0.0157755	0.0173667	0.0165711		8.16533e-05	0.00056814	0.000324896	0.000156921	0.000285629	0.000221275			0.0184777	0.0165711		0.000324896	0.000221275
NM_030082	107	493	1505	999	481	2752	1616.5		150	89	119.5	147	114	130.5		0.0664779	0.213022	0.13975	0.0798738	0.259745	0.169809		0.000314051	0.000115973	0.000215012	0.000378154	0.000164453	0.000271303			0.13975	0.169809		0.000215012	0.000271303
NM_010183	447	101	116	108.5	115	253	184		50	629	339.5	52	213	132.5		0.0136192	0.016419	0.0150191	0.0190966	0.0238792	0.0214879		0.000104684	0.000819633	0.000462158	0.000133769	0.000307268	0.000220518			0.0150191	0.0214879		0.000462158	0.000220518
NM_001163006	57	163	284	223.5	131	516	323.5		70	257	163.5	81	186	133.5		0.0219795	0.0401982	0.0310888	0.0217536	0.0487022	0.0352279		0.000146557	0.00033489	0.000240723	0.00020837	0.000268318	0.000238344			0.0310888	0.0352279		0.000240723	0.000238344
NM_029100	538	226	147	186.5	197	249	223		70	339	204.5	74	193	133.5		0.0304746	0.0208068	0.0256407	0.0327134	0.0235017	0.0281075		0.000146557	0.000441742	0.000294149	0.000190363	0.000278416	0.00023439			0.0256407	0.0281075		0.000294149	0.00023439
NM_009969	122	740	1585	1162.5	16	13	14.5		5555	19572	12563.5	166	103	134.5		0.0997843	0.224345	0.162065	0.00265692	0.00122699	0.00194196		0.0116304	0.0255037	0.0185671	0.000427031	0.000148585	0.000287808			0.162065	0.00194196		0.0185671	0.000287808
NM_145484	532	132	69	100.5	123	108	115.5		41	219	130	22	248	135		0.0177994	0.00976645	0.0137829	0.0204251	0.0101935	0.0153093		8.58407e-05	0.000285373	0.000185607	5.65944e-05	0.000357757	0.000207176			0.0137829	0.0153093		0.000185607	0.000207176
NM_020507	326	112	111	111.5	73	178	125.5		108	372	240	124	149	136.5		0.0151025	0.0157113	0.0154069	0.0121222	0.0168004	0.0144613		0.000226117	0.000484743	0.00035543	0.000318987	0.000214943	0.000266965			0.0154069	0.0144613		0.00035543	0.000266965
NM_001163608	488	94	126	110	62	255	158.5		58	290	174	59	219	139		0.0126753	0.0178344	0.0152548	0.0102956	0.024068	0.0171818		0.000121433	0.000377891	0.000249662	0.000151776	0.000315923	0.000233849			0.0152548	0.0171818		0.000249662	0.000233849
NM_194069	146	92	318	205	92	221	156.5		147	385	266	129	149	139		0.0124056	0.0450106	0.0287081	0.0152773	0.0208589	0.0180681		0.00030777	0.000501683	0.000404727	0.000331849	0.000214943	0.000273396			0.0287081	0.0180681		0.000404727	0.000273396
NM_028199	481	95	127	111	62	256	159		58	302	180	60	220	140		0.0128101	0.0179759	0.015393	0.0102956	0.0241623	0.017229		0.000121433	0.000393528	0.000257481	0.000154348	0.000317366	0.000235857			0.015393	0.017229		0.000257481	0.000235857
NM_010276	276	587	354	470.5	14	27	20.5		3380	1189	2284.5	220	62	141		0.0791532	0.0501062	0.0646297	0.00232481	0.00254837	0.00243659		0.00707662	0.00154935	0.00431299	0.000565944	8.94394e-05	0.000327692			0.0646297	0.00243659		0.00431299	0.000327692
NM_025352	63	105	273	189	120	335	227.5		199	91	145	271	24	147.5		0.0141586	0.0386412	0.0263999	0.0199269	0.0316187	0.0257728		0.000416641	0.00011858	0.00026761	0.00069714	3.46217e-05	0.000365881			0.0263999	0.0257728		0.00026761	0.000365881
NM_001199902	111	189	128	158.5	223	269	246		121	124	122.5	216	82	149		0.0254854	0.0181175	0.0218015	0.0370309	0.0253893	0.0312101		0.000253335	0.000161581	0.000207458	0.000555654	0.000118291	0.000336972			0.0218015	0.0312101		0.000207458	0.000336972
NM_025987	112	152	201	176.5	128	256	192		94	159	126.5	176	125	150.5		0.0204962	0.0284501	0.0244732	0.0212554	0.0241623	0.0227089		0.000196805	0.000207189	0.000201997	0.000452755	0.000180321	0.000316538			0.0244732	0.0227089		0.000201997	0.000316538
NM_001081212	1302	195	125	160	63	34	48.5		566	1329	947.5	188	113	150.5		0.0262945	0.0176929	0.0219937	0.0104616	0.00320906	0.00683535		0.00118502	0.00173178	0.0014584	0.000483625	0.00016301	0.000323318			0.0219937	0.00683535		0.0014584	0.000323318
NM_011498	392	326	323	324.5	127	110	118.5		498	778	638	201	103	152		0.043959	0.0457183	0.0448387	0.0210893	0.0103823	0.0157358		0.00104265	0.00101379	0.00102822	0.000517067	0.000148585	0.000332826			0.0448387	0.0157358		0.00102822	0.000332826
NM_026902	162	144	245	194.5	163	274	218.5		64	345	204.5	112	193	152.5		0.0194175	0.034678	0.0270477	0.0270674	0.0258613	0.0264643		0.000133995	0.00044956	0.000291778	0.000288117	0.000278416	0.000283267			0.0270477	0.0264643		0.000291778	0.000283267
NM_001164472	114	100	169	134.5	97	145	121		211	218	214.5	115	190	152.5		0.0134844	0.0239207	0.0187025	0.0161076	0.0136857	0.0148967		0.000441765	0.00028407	0.000362918	0.000295834	0.000274088	0.000284961			0.0187025	0.0148967		0.000362918	0.000284961
NM_172728	338	197	255	226	151	776	463.5		46	190	118	41	266	153.5		0.0265642	0.0360934	0.0313288	0.0250747	0.0732421	0.0491584		9.63091e-05	0.000247584	0.000171946	0.000105471	0.000383724	0.000244598			0.0313288	0.0491584		0.000171946	0.000244598
NM_009911	340	467	202	334.5	85	99	92		859	480	669.5	194	116	155		0.062972	0.0285916	0.0457818	0.0141149	0.00934403	0.0117295		0.00179847	0.000625475	0.00121197	0.00049906	0.000167338	0.000333199			0.0457818	0.0117295		0.00121197	0.000333199
NM_025554	191	124	171	147.5	94	236	165		139	256	197.5	168	144	156		0.0167206	0.0242038	0.0204622	0.0156094	0.0222747	0.018942		0.000291021	0.000333587	0.000312304	0.000432175	0.00020773	0.000319953			0.0204622	0.018942		0.000312304	0.000319953
NM_001177965	206	91	126	108.5	91	134	112.5		147	251	199	208	104	156		0.0122708	0.0178344	0.0150526	0.0151113	0.0126475	0.0138794		0.00030777	0.000327071	0.000317421	0.000535074	0.000150027	0.000342551			0.0150526	0.0138794		0.000317421	0.000342551
NM_024239	405	76	146	111	135	264	199.5		80	233	156.5	119	194	156.5		0.0102481	0.0206653	0.0154567	0.0224178	0.0249174	0.0236676		0.000167494	0.000303616	0.000235555	0.000306124	0.000279859	0.000292991			0.0154567	0.0236676		0.000235555	0.000292991
NM_019726	308	75	131	103	129	191	160		155	257	206	137	176	156.5		0.0101133	0.0185421	0.0143277	0.0214215	0.0180274	0.0197244		0.00032452	0.00033489	0.000329705	0.000352429	0.000253892	0.000303161			0.0143277	0.0197244		0.000329705	0.000303161
NM_001035122	374	141	61	101	103	80	91.5		239	138	188.5	205	110	157.5		0.0190129	0.00863411	0.0138235	0.017104	0.00755073	0.0123273		0.000500388	0.000179824	0.000340106	0.000527357	0.000158683	0.00034302			0.0138235	0.0123273		0.000340106	0.00034302
NM_027307	374	141	61	101	103	80	91.5		239	138	188.5	205	110	157.5		0.0190129	0.00863411	0.0138235	0.017104	0.00755073	0.0123273		0.000500388	0.000179824	0.000340106	0.000527357	0.000158683	0.00034302			0.0138235	0.0123273		0.000340106	0.00034302
NM_021528	400	108	103	105.5	121	100	110.5		133	329	231	174	143	158.5		0.0145631	0.0145789	0.014571	0.020093	0.00943841	0.0147657		0.000278459	0.000428711	0.000353585	0.00044761	0.000206288	0.000326949			0.014571	0.0147657		0.000353585	0.000326949
NM_181282	226	189	171	180	201	175	188		77	337	207	111	211	161		0.0254854	0.0242038	0.0248446	0.0333776	0.0165172	0.0249474		0.000161213	0.000439135	0.000300174	0.000285545	0.000304382	0.000294963			0.0248446	0.0249474		0.000300174	0.000294963
NM_027244	124	129	302	215.5	155	363	259		142	138	140	242	82	162		0.0173948	0.0427459	0.0300704	0.025739	0.0342614	0.0300002		0.000297302	0.000179824	0.000238563	0.000622538	0.000118291	0.000370415			0.0300704	0.0300002		0.000238563	0.000370415
NM_181392	52	101	166	133.5	42	194	118		170	147	158.5	204	120	162		0.0136192	0.0234961	0.0185577	0.00697443	0.0183105	0.0126425		0.000355925	0.000191552	0.000273738	0.000524784	0.000173108	0.000348946			0.0185577	0.0126425		0.000273738	0.000348946
NM_001159351	84	132	129	130.5	177	213	195		83	236	159.5	92	234	163		0.0177994	0.018259	0.0180292	0.0293922	0.0201038	0.024748		0.000173775	0.000307525	0.00024065	0.000236668	0.000337562	0.000287115			0.0180292	0.024748		0.00024065	0.000287115
NM_001111062	246	123	161	142	100	186	143		164	274	219	137	191	164		0.0165858	0.0227884	0.0196871	0.0166058	0.0175555	0.0170806		0.000343363	0.000357042	0.000350202	0.000352429	0.000275531	0.00031398			0.0196871	0.0170806		0.000350202	0.00031398
NM_001111063	246	123	161	142	100	186	143		164	274	219	137	191	164		0.0165858	0.0227884	0.0196871	0.0166058	0.0175555	0.0170806		0.000343363	0.000357042	0.000350202	0.000352429	0.000275531	0.00031398			0.0196871	0.0170806		0.000350202	0.00031398
NM_007744	246	123	161	142	100	186	143		164	274	219	137	191	164		0.0165858	0.0227884	0.0196871	0.0166058	0.0175555	0.0170806		0.000343363	0.000357042	0.000350202	0.000352429	0.000275531	0.00031398			0.0196871	0.0170806		0.000350202	0.00031398
NM_010738	115	207	14	110.5	187	45	116		432	42	237	260	68	164		0.0279126	0.0019816	0.0149471	0.0310528	0.00424729	0.01765		0.000904468	5.4729e-05	0.000479598	0.000668843	9.80948e-05	0.000383469			0.0149471	0.01765		0.000479598	0.000383469
NM_001008543	173	126	128	127	37	82	59.5		477	444	460.5	180	149	164.5		0.0169903	0.0181175	0.0175539	0.00614414	0.0077395	0.00694182		0.000998683	0.000578564	0.000788624	0.000463045	0.000214943	0.000338994			0.0175539	0.00694182		0.000788624	0.000338994
NM_001017426	1622	363	314	338.5	131	85	108		441	2870	1655.5	109	221	165		0.0489482	0.0444444	0.0466963	0.0217536	0.00802265	0.0148881		0.000923311	0.00373982	0.00233156	0.0002804	0.000318808	0.000299604			0.0466963	0.0148881		0.00233156	0.000299604
NM_025864	331	235	274	254.5	191	356	273.5		103	299	201	97	234	165.5		0.0316882	0.0387827	0.0352355	0.031717	0.0336008	0.0326589		0.000215649	0.000389619	0.000302634	0.00024953	0.000337562	0.000293546			0.0352355	0.0326589		0.000302634	0.000293546
NM_007621	225	51	178	114.5	63	160	111.5		202	562	382	188	143	165.5		0.00687702	0.0251946	0.0160358	0.0104616	0.0151015	0.0127816		0.000422922	0.000732327	0.000577625	0.000483625	0.000206288	0.000344956			0.0160358	0.0127816		0.000577625	0.000344956
NM_011890	301	117	110	113.5	79	245	162		105	322	213.5	144	190	167		0.0157767	0.0155697	0.0156732	0.0131186	0.0231241	0.0181213		0.000219836	0.000419589	0.000319713	0.000370436	0.000274088	0.000322262			0.0156732	0.0181213		0.000319713	0.000322262
NM_153799	489	104	97	100.5	104	142	123		149	327	238	169	166	167.5		0.0140237	0.0137297	0.0138767	0.01727	0.0134025	0.0153363		0.000311958	0.000426105	0.000369031	0.000434748	0.000239467	0.000337107			0.0138767	0.0153363		0.000369031	0.000337107
NM_001177751	88	139	170	154.5	26	112	69		600	591	595.5	95	240	167.5		0.0187433	0.0240623	0.0214028	0.0043175	0.010571	0.00744426		0.00125621	0.000770116	0.00101316	0.000244385	0.000346217	0.000295301			0.0214028	0.00744426		0.00101316	0.000295301
NM_011288	127	126	187	156.5	142	224	183		164	182	173	226	112	169		0.0169903	0.0264685	0.0217294	0.0235802	0.021142	0.0223611		0.000343363	0.000237159	0.000290261	0.000581379	0.000161568	0.000371473			0.0217294	0.0223611		0.000290261	0.000371473
NM_001166545	92	235	457	346	169	731	450		120	329	224.5	72	266	169		0.0316882	0.0646851	0.0481867	0.0280638	0.0689948	0.0485293		0.000251241	0.000428711	0.000339976	0.000185218	0.000383724	0.000284471			0.0481867	0.0485293		0.000339976	0.000284471
NM_026532	108	253	346	299.5	269	644	456.5		163	283	223	158	182	170		0.0341154	0.0489738	0.0415446	0.0446695	0.0607834	0.0527265		0.000341269	0.00036877	0.000355019	0.000406451	0.000262548	0.000334499			0.0415446	0.0527265		0.000355019	0.000334499
NM_001160236	182	104	146	125	59	138	98.5		122	341	231.5	105	235	170		0.0140237	0.0206653	0.0173445	0.00979741	0.013025	0.0114112		0.000255428	0.000444348	0.000349888	0.00027011	0.000339004	0.000304557			0.0173445	0.0114112		0.000349888	0.000304557
NM_178661	502	108	125	116.5	78	152	115		47	484	265.5	60	283	171.5		0.0145631	0.0176929	0.016128	0.0129525	0.0143464	0.0136494		9.84027e-05	0.000630687	0.000364545	0.000154348	0.000408247	0.000281298			0.016128	0.0136494		0.000364545	0.000281298
NM_207681	121	199	141	170	75	56	65.5		415	727	571	146	197	171.5		0.0268339	0.0199575	0.0233957	0.0124543	0.00528551	0.00886992		0.000868875	0.000947334	0.000908104	0.000375581	0.000284186	0.000329884			0.0233957	0.00886992		0.000908104	0.000329884
NM_180588	238	132	93	112.5	189	186	187.5		206	261	233.5	209	136	172.5		0.0177994	0.0131635	0.0154814	0.0313849	0.0175555	0.0244702		0.000431297	0.000340102	0.0003857	0.000537647	0.00019619	0.000366918			0.0154814	0.0244702		0.0003857	0.000366918
NM_025365	55	92	242	167	119	419	269		73	266	169.5	119	232	175.5		0.0124056	0.0342534	0.0233295	0.0197609	0.039547	0.0296539		0.000152838	0.000346617	0.000249728	0.000306124	0.000334676	0.0003204			0.0233295	0.0296539		0.000249728	0.0003204
NM_145220	643	82	126	104	68	62	65		259	638	448.5	151	200	175.5		0.0110572	0.0178344	0.0144458	0.0112919	0.00585182	0.00857187		0.000542262	0.00083136	0.000686811	0.000388443	0.000288514	0.000338479			0.0144458	0.00857187		0.000686811	0.000338479
NM_001163241	212	99	157	128	54	165	109.5		187	363	275	112	240	176		0.0133495	0.0222222	0.0177859	0.00896712	0.0155734	0.0122703		0.000391517	0.000473015	0.000432266	0.000288117	0.000346217	0.000317167			0.0177859	0.0122703		0.000432266	0.000317167
NM_001163242	212	99	157	128	54	165	109.5		187	363	275	112	240	176		0.0133495	0.0222222	0.0177859	0.00896712	0.0155734	0.0122703		0.000391517	0.000473015	0.000432266	0.000288117	0.000346217	0.000317167			0.0177859	0.0122703		0.000432266	0.000317167
NM_020282	212	99	157	128	54	165	109.5		187	363	275	112	240	176		0.0133495	0.0222222	0.0177859	0.00896712	0.0155734	0.0122703		0.000391517	0.000473015	0.000432266	0.000288117	0.000346217	0.000317167			0.0177859	0.0122703		0.000432266	0.000317167
NM_001163502	1070	110	112	111	111	76	93.5		209	779	494	131	221	176		0.0148328	0.0158528	0.0153428	0.0184324	0.00717319	0.0128028		0.000437578	0.00101509	0.000726336	0.000336994	0.000318808	0.000327901			0.0153428	0.0128028		0.000726336	0.000327901
NM_001163501	1070	110	112	111	111	76	93.5		209	779	494	131	221	176		0.0148328	0.0158528	0.0153428	0.0184324	0.00717319	0.0128028		0.000437578	0.00101509	0.000726336	0.000336994	0.000318808	0.000327901			0.0153428	0.0128028		0.000726336	0.000327901
NM_001164729	55	92	242	167	119	419	269		76	272	174	117	236	176.5		0.0124056	0.0342534	0.0233295	0.0197609	0.039547	0.0296539		0.000159119	0.000354436	0.000256778	0.000300979	0.000340447	0.000320713			0.0233295	0.0296539		0.000256778	0.000320713
NM_028047	501	129	211	170	108	230	169		195	306	250.5	234	120	177		0.0173948	0.0298655	0.0236302	0.0179342	0.0217084	0.0198213		0.000408267	0.00039874	0.000403503	0.000601959	0.000173108	0.000387534			0.0236302	0.0198213		0.000403503	0.000387534
NM_010847	209	136	141	138.5	38	88	63		497	450	473.5	196	160	178		0.0183387	0.0199575	0.0191481	0.0063102	0.0083058	0.007308		0.00104056	0.000586383	0.00081347	0.000504205	0.000230811	0.000367508			0.0191481	0.007308		0.00081347	0.000367508
NM_001195390	110	116	93	104.5	103	139	121		141	191	166	166	192	179		0.0156419	0.0131635	0.0144027	0.017104	0.0131194	0.0151117		0.000295208	0.000248887	0.000272048	0.000427031	0.000276974	0.000352002			0.0144027	0.0151117		0.000272048	0.000352002
NM_001253714	191	93	115	104	87	169	128		137	216	176.5	178	180	179		0.0125405	0.0162774	0.0144089	0.014447	0.0159509	0.015199		0.000286834	0.000281464	0.000284149	0.0004579	0.000259663	0.000358781			0.0144089	0.015199		0.000284149	0.000358781
NM_133747	496	88	143	115.5	93	123	108		122	339	230.5	185	173	179		0.0118662	0.0202406	0.0160534	0.0154434	0.0116092	0.0135263		0.000255428	0.000441742	0.000348585	0.000475908	0.000249565	0.000362736			0.0160534	0.0135263		0.000348585	0.000362736
NM_011794	289	80	138	109	89	92	90.5		263	356	309.5	199	159	179		0.0107875	0.0195329	0.0151602	0.0147791	0.00868334	0.0117312		0.000550637	0.000463894	0.000507265	0.000511922	0.000229369	0.000370645			0.0151602	0.0117312		0.000507265	0.000370645
NM_019443	51	121	242	181.5	112	267	189.5		263	225	244	220	139	179.5		0.0163161	0.0342534	0.0252847	0.0185985	0.0252006	0.0218995		0.000550637	0.000293191	0.000421914	0.000565944	0.000200517	0.000383231			0.0252847	0.0218995		0.000421914	0.000383231
NM_001045523	753	108	135	121.5	121	242	181.5		88	410	249	140	219	179.5		0.0145631	0.0191083	0.0168357	0.020093	0.022841	0.021467		0.000184243	0.00053426	0.000359252	0.000360146	0.000315923	0.000338035			0.0168357	0.021467		0.000359252	0.000338035
NM_010559	441	382	257	319.5	170	179	174.5		123	467	295	73	286	179.5		0.0515102	0.0363765	0.0439434	0.0282298	0.0168948	0.0225623		0.000257522	0.000608535	0.000433028	0.000187791	0.000412575	0.000300183			0.0439434	0.0225623		0.000433028	0.000300183
NM_178600	142	80	160	120	79	217	148		125	158	141.5	183	179	181		0.0107875	0.0226469	0.0167172	0.0131186	0.0204814	0.0168		0.000261709	0.000205885	0.000233797	0.000470763	0.00025822	0.000364491			0.0167172	0.0168		0.000233797	0.000364491
NM_010022	463	124	115	119.5	150	77	113.5		103	377	240	133	229	181		0.0167206	0.0162774	0.016499	0.0249087	0.00726758	0.0160881		0.000215649	0.000491258	0.000353453	0.000342139	0.000330349	0.000336244			0.016499	0.0160881		0.000353453	0.000336244
NM_001160235	187	105	143	124	61	142	101.5		137	375	256	117	245	181		0.0141586	0.0202406	0.0171996	0.0101295	0.0134025	0.011766		0.000286834	0.000488652	0.000387743	0.000300979	0.00035343	0.000327205			0.0171996	0.011766		0.000387743	0.000327205
NM_183358	203	107	118	112.5	126	239	182.5		213	119	166	272	92	182		0.0144283	0.0167021	0.0155652	0.0209233	0.0225578	0.0217405		0.000445953	0.000155066	0.000300509	0.000699713	0.000132716	0.000416215			0.0155652	0.0217405		0.000300509	0.000416215
NM_144844	705	122	105	113.5	92	145	118.5		164	348	256	102	263	182.5		0.0164509	0.014862	0.0156565	0.0152773	0.0136857	0.0144815		0.000343363	0.000453469	0.000398416	0.000262392	0.000379396	0.000320894			0.0156565	0.0144815		0.000398416	0.000320894
NM_020590	98	110	193	151.5	57	227	142		241	371	306	156	212	184		0.0148328	0.0273178	0.0210753	0.00946529	0.0214252	0.0154452		0.000504576	0.00048344	0.000494008	0.000401306	0.000305825	0.000353565			0.0210753	0.0154452		0.000494008	0.000353565
NM_028881	673	85	125	105	56	183	119.5		99	562	330.5	56	312	184		0.0114617	0.0176929	0.0145773	0.00929924	0.0172723	0.0132858		0.000207274	0.000732327	0.0004698	0.000144058	0.000450082	0.00029707			0.0145773	0.0132858		0.0004698	0.00029707
NM_177699	1178	93	171	132	72	81	76.5		175	777	476	146	222	184		0.0125405	0.0242038	0.0183721	0.0119562	0.00764512	0.00980064		0.000366393	0.00101249	0.00068944	0.000375581	0.000320251	0.000347916			0.0183721	0.00980064		0.00068944	0.000347916
NM_152806	251	158	158	158	198	243	220.5		104	262	183	196	175	185.5		0.0213053	0.0223638	0.0218345	0.0328794	0.0229353	0.0279074		0.000217742	0.000341405	0.000279574	0.000504205	0.00025245	0.000378327			0.0218345	0.0279074		0.000279574	0.000378327
NM_029466	161	238	164	201	23	55	39		255	964	609.5	55	316	185.5		0.0320928	0.023213	0.0276529	0.00381933	0.00519113	0.00450523		0.000533887	0.00125616	0.000895025	0.000141486	0.000455852	0.000298669			0.0276529	0.00450523		0.000895025	0.000298669
NM_199449	817	157	69	113	91	32	61.5		415	675	545	190	182	186		0.0211704	0.00976645	0.0154684	0.0151113	0.00302029	0.00906578		0.000868875	0.000879574	0.000874225	0.00048877	0.000262548	0.000375659			0.0154684	0.00906578		0.000874225	0.000375659
NM_010171	275	129	140	134.5	6	74	40		416	783	599.5	88	285	186.5		0.0173948	0.019816	0.0186054	0.000996347	0.00698443	0.00399039		0.000870969	0.00102031	0.000945637	0.000226378	0.000411133	0.000318755			0.0186054	0.00399039		0.000945637	0.000318755
NM_015740	106	161	215	188	132	314	223		235	198	216.5	251	123	187		0.0217098	0.0304317	0.0260708	0.0219196	0.0296366	0.0257781		0.000492014	0.000258008	0.000375011	0.000645691	0.000177436	0.000411563			0.0260708	0.0257781		0.000375011	0.000411563
NM_027995	326	75	156	115.5	56	146	101		196	318	257	205	171	188		0.0101133	0.0220807	0.016097	0.00929924	0.0137801	0.0115397		0.00041036	0.000414377	0.000412369	0.000527357	0.00024668	0.000387018			0.016097	0.0115397		0.000412369	0.000387018
NM_001081287	557	136	147	141.5	63	104	83.5		174	677	425.5	85	291	188		0.0183387	0.0208068	0.0195728	0.0104616	0.00981595	0.0101388		0.000364299	0.00088218	0.00062324	0.00021866	0.000419788	0.000319224			0.0195728	0.0101388		0.00062324	0.000319224
NM_207680	177	235	168	201.5	83	61	72		440	825	632.5	151	226	188.5		0.0316882	0.0237792	0.0277337	0.0137828	0.00575743	0.00977011		0.000921217	0.00107503	0.000998126	0.000388443	0.000326021	0.000357232			0.0277337	0.00977011		0.000998126	0.000357232
NM_001166138	380	86	126	106	111	192	151.5		86	394	240	139	239	189		0.0115965	0.0178344	0.0147155	0.0184324	0.0181218	0.0182771		0.000180056	0.000513411	0.000346733	0.000357574	0.000344774	0.000351174			0.0147155	0.0182771		0.000346733	0.000351174
NM_026662	299	95	137	116	67	129	98		89	448	268.5	72	306	189		0.0128101	0.0193914	0.0161008	0.0111259	0.0121756	0.0116507		0.000186337	0.000583776	0.000385057	0.000185218	0.000441427	0.000313322			0.0161008	0.0116507		0.000385057	0.000313322
NM_033563	282	161	102	131.5	205	80	142.5		230	318	274	203	176	189.5		0.0217098	0.0144374	0.0180736	0.0340418	0.00755073	0.0207963		0.000481545	0.000414377	0.000447961	0.000522212	0.000253892	0.000388052			0.0180736	0.0207963		0.000447961	0.000388052
NM_175326	831	136	111	123.5	112	75	93.5		190	399	294.5	170	209	189.5		0.0183387	0.0157113	0.017025	0.0185985	0.00707881	0.0128386		0.000397798	0.000519926	0.000458862	0.00043732	0.000301497	0.000369409			0.017025	0.0128386		0.000458862	0.000369409
NM_001190321	156	145	88	116.5	158	63	110.5		388	232	310	293	86	189.5		0.0195523	0.0124558	0.016004	0.0262371	0.0059462	0.0160917		0.000812346	0.000302313	0.000557329	0.000753735	0.000124061	0.000438898			0.016004	0.0160917		0.000557329	0.000438898
NM_026446	197	126	207	166.5	101	185	143		238	444	341	233	148	190.5		0.0169903	0.0292994	0.0231448	0.0167718	0.0174611	0.0171165		0.000498295	0.000578564	0.000538429	0.000599386	0.0002135	0.000406443			0.0231448	0.0171165		0.000538429	0.000406443
NM_024433	264	134	204	169	142	235	188.5		140	413	276.5	166	216	191		0.018069	0.0288747	0.0234719	0.0235802	0.0221803	0.0228802		0.000293115	0.000538169	0.000415642	0.000427031	0.000311595	0.000369313			0.0234719	0.0228802		0.000415642	0.000369313
NM_019998	396	86	141	113.5	71	122	96.5		111	576	343.5	78	305	191.5		0.0115965	0.0199575	0.015777	0.0117901	0.0115149	0.0116525		0.000232398	0.00075057	0.000491484	0.000200653	0.000439984	0.000320318			0.015777	0.0116525		0.000491484	0.000320318
NM_001253716	172	96	107	101.5	91	169	130		160	234	197	198	186	192		0.012945	0.0151451	0.014045	0.0151113	0.0159509	0.0155311		0.000334988	0.000304919	0.000319954	0.00050935	0.000268318	0.000388834			0.014045	0.0155311		0.000319954	0.000388834
NM_144538	364	74	190	132	58	73	65.5		176	429	302.5	180	204	192		0.00997843	0.0268931	0.0184358	0.00963135	0.00689004	0.0082607		0.000368487	0.000559018	0.000463752	0.000463045	0.000294284	0.000378665			0.0184358	0.0082607		0.000463752	0.000378665
NM_018860	6	88	140	114	108	235	171.5		235	167	201	273	113	193		0.0118662	0.019816	0.0158411	0.0179342	0.0221803	0.0200573		0.000492014	0.000217613	0.000354813	0.000702285	0.00016301	0.000432648			0.0158411	0.0200573		0.000354813	0.000432648
NM_007622	166	144	79	111.5	133	159	146		87	307	197	145	244	194.5		0.0194175	0.0111819	0.0152997	0.0220857	0.0150071	0.0185464		0.00018215	0.000400043	0.000291097	0.000373009	0.000351987	0.000362498			0.0152997	0.0185464		0.000291097	0.000362498
NM_008204	285	201	243	222	145	303	224		154	355	254.5	140	250	195		0.0271036	0.0343949	0.0307492	0.0240784	0.0285984	0.0263384		0.000322426	0.000462591	0.000392508	0.000360146	0.000360643	0.000360394			0.0307492	0.0263384		0.000392508	0.000360394
NM_138660	679	105	131	118	162	166	164		119	429	274	208	182	195		0.0141586	0.0185421	0.0163503	0.0269014	0.0156678	0.0212846		0.000249147	0.000559018	0.000404083	0.000535074	0.000262548	0.000398811			0.0163503	0.0212846		0.000404083	0.000398811
NM_016896	923	123	107	115	40	48	44		440	694	567	214	176	195		0.0165858	0.0151451	0.0158654	0.00664231	0.00453044	0.00558638		0.000921217	0.000904332	0.000912775	0.000550509	0.000253892	0.000402201			0.0158654	0.00558638		0.000912775	0.000402201
NM_001001186	439	95	116	105.5	53	113	83		130	389	259.5	109	283	196		0.0128101	0.016419	0.0146146	0.00880106	0.0106654	0.00973324		0.000272178	0.000506895	0.000389536	0.0002804	0.000408247	0.000344324			0.0146146	0.00973324		0.000389536	0.000344324
NM_207652	1058	144	186	165	36	133	84.5		632	652	642	107	286	196.5		0.0194175	0.026327	0.0228722	0.00597808	0.0125531	0.00926559		0.0013232	0.000849603	0.0010864	0.000275255	0.000412575	0.000343915			0.0228722	0.00926559		0.0010864	0.000343915
NM_001165991	182	126	86	106	105	113	109		299	495	397	232	162	197		0.0169903	0.0121727	0.0145815	0.0174361	0.0106654	0.0140507		0.000626009	0.000645021	0.000635515	0.000596814	0.000233696	0.000415255			0.0145815	0.0140507		0.000635515	0.000415255
NM_001165992	182	126	86	106	105	113	109		299	495	397	232	162	197		0.0169903	0.0121727	0.0145815	0.0174361	0.0106654	0.0140507		0.000626009	0.000645021	0.000635515	0.000596814	0.000233696	0.000415255			0.0145815	0.0140507		0.000635515	0.000415255
NM_029702	182	126	86	106	105	113	109		299	495	397	232	162	197		0.0169903	0.0121727	0.0145815	0.0174361	0.0106654	0.0140507		0.000626009	0.000645021	0.000635515	0.000596814	0.000233696	0.000415255			0.0145815	0.0140507		0.000635515	0.000415255
NM_019735	222	101	117	109	89	177	133		195	265	230	212	186	199		0.0136192	0.0165605	0.0150899	0.0147791	0.016706	0.0157426		0.000408267	0.000345314	0.00037679	0.000545364	0.000268318	0.000406841			0.0150899	0.0157426		0.00037679	0.000406841
NM_174997	175	112	145	128.5	60	147	103.5		141	402	271.5	138	260	199		0.0151025	0.0205237	0.0178131	0.00996347	0.0138745	0.011919		0.000295208	0.000523835	0.000409522	0.000355001	0.000375068	0.000365035			0.0178131	0.011919		0.000409522	0.000365035
NM_145384	274	145	92	118.5	101	104	102.5		334	475	404.5	243	157	200		0.0195523	0.0130219	0.0162871	0.0167718	0.00981595	0.0132939		0.000699288	0.000618959	0.000659123	0.000625111	0.000226484	0.000425797			0.0162871	0.0132939		0.000659123	0.000425797
NM_009855	287	177	84	130.5	167	103	135		263	410	336.5	189	214	201.5		0.0238673	0.0118896	0.0178785	0.0277317	0.00972157	0.0187266		0.000550637	0.00053426	0.000542448	0.000486197	0.00030871	0.000397454			0.0178785	0.0187266		0.000542448	0.000397454
NM_001167767	217	61	158	109.5	56	124	90		117	375	246	123	282	202.5		0.00822546	0.0223638	0.0152946	0.00929924	0.0117036	0.0105014		0.00024496	0.000488652	0.000366806	0.000316414	0.000406805	0.00036161			0.0152946	0.0105014		0.000366806	0.00036161
NM_008057	553	93	110	101.5	63	227	145		129	428	278.5	81	325	203		0.0125405	0.0155697	0.0140551	0.0104616	0.0214252	0.0159434		0.000270084	0.000557715	0.0004139	0.00020837	0.000468835	0.000338603			0.0140551	0.0159434		0.0004139	0.000338603
NM_001190179	289	80	121	100.5	129	143	136		188	390	289	129	277	203		0.0107875	0.0171267	0.0139571	0.0214215	0.0134969	0.0174592		0.000393611	0.000508198	0.000450905	0.000331849	0.000399592	0.000365721			0.0139571	0.0174592		0.000450905	0.000365721
NM_027091	306	80	125	102.5	132	147	139.5		203	392	297.5	129	277	203		0.0107875	0.0176929	0.0142402	0.0219196	0.0138745	0.017897		0.000425016	0.000510804	0.00046791	0.000331849	0.000399592	0.000365721			0.0142402	0.017897		0.00046791	0.000365721
NM_009125	1267	151	200	175.5	198	316	257		62	414	238	108	299	203.5		0.0203614	0.0283086	0.024335	0.0328794	0.0298254	0.0313524		0.000129808	0.000539472	0.00033464	0.000277827	0.000431329	0.000354578			0.024335	0.0313524		0.00033464	0.000354578
NM_025450	101	84	132	108	112	170	141		194	314	254	170	237	203.5		0.0113269	0.0186837	0.0150053	0.0185985	0.0160453	0.0173219		0.000406173	0.000409165	0.000407669	0.00043732	0.000341889	0.000389605			0.0150053	0.0173219		0.000407669	0.000389605
NM_146176	732	139	135	137	143	223	183		140	375	257.5	155	252	203.5		0.0187433	0.0191083	0.0189258	0.0237463	0.0210477	0.022397		0.000293115	0.000488652	0.000390883	0.000398733	0.000363528	0.000381131			0.0189258	0.022397		0.000390883	0.000381131
NM_001082536	910	110	139	124.5	135	213	174		172	621	396.5	176	236	206		0.0148328	0.0196745	0.0172536	0.0224178	0.0201038	0.0212608		0.000360112	0.000809208	0.00058466	0.000452755	0.000340447	0.000396601			0.0172536	0.0212608		0.00058466	0.000396601
NM_139304	575	328	321	324.5	322	466	394		100	334	217	106	307	206.5		0.0442287	0.0454352	0.044832	0.0534706	0.043983	0.0487268		0.000209368	0.000435226	0.000322297	0.000272682	0.000442869	0.000357776			0.044832	0.0487268		0.000322297	0.000357776
NM_181281	300	213	213	213	228	214	221		112	450	281	128	285	206.5		0.0287217	0.0301486	0.0294352	0.0378612	0.0201982	0.0290297		0.000234492	0.000586383	0.000410437	0.000329277	0.000411133	0.000370205			0.0294352	0.0290297		0.000410437	0.000370205
NM_025947	77	233	471	352	115	608	361.5		98	373	235.5	65	349	207		0.0314186	0.0666667	0.0490426	0.0190966	0.0573856	0.0382411		0.00020518	0.000486046	0.000345613	0.000167211	0.000503457	0.000335334			0.0490426	0.0382411		0.000345613	0.000335334
NM_027246	67	91	161	126	80	237	158.5		272	95	183.5	354	61	207.5		0.0122708	0.0227884	0.0175296	0.0132846	0.022369	0.0178268		0.00056948	0.000123792	0.000346636	0.000910655	8.79968e-05	0.000499326			0.0175296	0.0178268		0.000346636	0.000499326
NM_031248	106	102	243	172.5	97	392	244.5		259	309	284	317	99	208		0.013754	0.0343949	0.0240745	0.0161076	0.0369986	0.0265531		0.000542262	0.000402649	0.000472456	0.000815474	0.000142814	0.000479144			0.0240745	0.0265531		0.000472456	0.000479144
NM_172699	604	151	130	140.5	96	181	138.5		144	593	368.5	88	329	208.5		0.0203614	0.0184006	0.019381	0.0159415	0.0170835	0.0165125		0.000301489	0.000772722	0.000537106	0.000226378	0.000474606	0.000350492			0.019381	0.0165125		0.000537106	0.000350492
NM_001161370	325	118	125	121.5	105	206	155.5		233	267	250	182	236	209		0.0159115	0.0176929	0.0168022	0.0174361	0.0194431	0.0184396		0.000487826	0.00034792	0.000417873	0.00046819	0.000340447	0.000404318			0.0168022	0.0184396		0.000417873	0.000404318
NM_153141	566	109	112	110.5	111	104	107.5		62	535	298.5	136	282	209		0.014698	0.0158528	0.0152754	0.0184324	0.00981595	0.0141242		0.000129808	0.000697144	0.000413476	0.000349856	0.000406805	0.000378331			0.0152754	0.0141242		0.000413476	0.000378331
NM_153049	945	114	151	132.5	146	217	181.5		182	647	414.5	178	241	209.5		0.0153722	0.021373	0.0183726	0.0242444	0.0204814	0.0223629		0.000381049	0.000843088	0.000612068	0.0004579	0.00034766	0.00040278			0.0183726	0.0223629		0.000612068	0.00040278
NM_021531	589	109	112	110.5	114	108	111		62	541	301.5	136	284	210		0.014698	0.0158528	0.0152754	0.0189306	0.0101935	0.014562		0.000129808	0.000704962	0.000417385	0.000349856	0.00040969	0.000379773			0.0152754	0.014562		0.000417385	0.000379773
NM_001163246	1026	109	101	105	150	126	138		80	531	305.5	77	343	210		0.014698	0.0142958	0.0144969	0.0249087	0.0118924	0.0184005		0.000167494	0.000691932	0.000429713	0.00019808	0.000494802	0.000346441			0.0144969	0.0184005		0.000429713	0.000346441
NM_053173	653	104	142	123	198	253	225.5		150	249	199.5	263	158	210.5		0.0140237	0.0200991	0.0170614	0.0328794	0.0238792	0.0283793		0.000314051	0.000324465	0.000319258	0.00067656	0.000227926	0.000452243			0.0170614	0.0283793		0.000319258	0.000452243
NM_025928	183	91	134	112.5	126	257	191.5		187	275	231	171	250	210.5		0.0122708	0.0189667	0.0156188	0.0209233	0.0242567	0.02259		0.000391517	0.000358345	0.000374931	0.000439893	0.000360643	0.000400268			0.0156188	0.02259		0.000374931	0.000400268
NM_001040684	323	115	153	134	99	118	108.5		246	519	382.5	208	213	210.5		0.015507	0.0216561	0.0185815	0.0164397	0.0111373	0.0137885		0.000515044	0.000676295	0.000595669	0.000535074	0.000307268	0.000421171			0.0185815	0.0137885		0.000595669	0.000421171
NM_008378	299	95	124	109.5	79	104	91.5		182	499	340.5	215	207	211		0.0128101	0.0175513	0.0151807	0.0131186	0.00981595	0.0114673		0.000381049	0.000650233	0.000515641	0.000553082	0.000298612	0.000425847			0.0151807	0.0114673		0.000515641	0.000425847
NM_009459	164	166	170	168	98	210	154		265	467	366	142	280	211		0.022384	0.0240623	0.0232232	0.0162737	0.0198207	0.0180472		0.000554824	0.000608535	0.000581679	0.000365291	0.00040392	0.000384605			0.0232232	0.0180472		0.000581679	0.000384605
NM_009477	292	130	184	157	149	115	132		336	336	336	297	126	211.5		0.0175297	0.0260439	0.0217868	0.0247426	0.0108542	0.0177984		0.000703475	0.000437832	0.000570654	0.000764024	0.000181764	0.000472894			0.0217868	0.0177984		0.000570654	0.000472894
NM_001159402	292	130	184	157	149	115	132		336	336	336	297	126	211.5		0.0175297	0.0260439	0.0217868	0.0247426	0.0108542	0.0177984		0.000703475	0.000437832	0.000570654	0.000764024	0.000181764	0.000472894			0.0217868	0.0177984		0.000570654	0.000472894
NM_001159401	292	130	184	157	149	115	132		336	336	336	297	126	211.5		0.0175297	0.0260439	0.0217868	0.0247426	0.0108542	0.0177984		0.000703475	0.000437832	0.000570654	0.000764024	0.000181764	0.000472894			0.0217868	0.0177984		0.000570654	0.000472894
NM_013602	42	422	1068	745	395	1324	859.5		293	230	261.5	306	118	212		0.056904	0.151168	0.104036	0.0655928	0.124965	0.0952787		0.000613447	0.000299707	0.000456577	0.000787177	0.000170223	0.0004787			0.104036	0.0952787		0.000456577	0.0004787
NM_194068	186	101	405	253	104	274	189		196	651	423.5	210	214	212		0.0136192	0.0573248	0.035472	0.01727	0.0258613	0.0215656		0.00041036	0.0008483	0.00062933	0.000540219	0.00030871	0.000424465			0.035472	0.0215656		0.00062933	0.000424465
NM_025415	60	188	249	218.5	92	254	173		528	368	448	243	181	212		0.0253506	0.0352442	0.0302974	0.0152773	0.0239736	0.0196254		0.00110546	0.000479531	0.000792496	0.000625111	0.000261105	0.000443108			0.0302974	0.0196254		0.000792496	0.000443108
NM_001012309	523	159	119	139	179	278	228.5		173	171	172	187	238	212.5		0.0214401	0.0168436	0.0191419	0.0297243	0.0262388	0.0279816		0.000362206	0.000222825	0.000292516	0.000481052	0.000343332	0.000412192			0.0191419	0.0279816		0.000292516	0.000412192
NM_026994	314	94	135	114.5	162	193	177.5		94	317	205.5	204	221	212.5		0.0126753	0.0191083	0.0158918	0.0269014	0.0182161	0.0225588		0.000196805	0.000413074	0.00030494	0.000524784	0.000318808	0.000421796			0.0158918	0.0225588		0.00030494	0.000421796
NM_145939	419	96	149	122.5	94	159	126.5		238	269	253.5	237	188	212.5		0.012945	0.0210899	0.0170174	0.0156094	0.0150071	0.0153083		0.000498295	0.000350527	0.000424411	0.000609676	0.000271203	0.00044044			0.0170174	0.0153083		0.000424411	0.00044044
NM_009832	563	124	156	140	108	212	160		142	428	285	147	278	212.5		0.0167206	0.0220807	0.0194006	0.0179342	0.0200094	0.0189718		0.000297302	0.000557715	0.000427508	0.000378154	0.000401035	0.000389594			0.0194006	0.0189718		0.000427508	0.000389594
NM_172965	1037	126	176	151	156	432	294		75	343	209	116	312	214		0.0169903	0.0249115	0.0209509	0.025905	0.0407739	0.0333395		0.000157026	0.000446954	0.00030199	0.000298407	0.000450082	0.000374244			0.0209509	0.0333395		0.00030199	0.000374244
NM_019965	357	174	186	180	200	251	225.5		173	337	255	177	251	214		0.0234628	0.026327	0.0248949	0.0332116	0.0236904	0.028451		0.000362206	0.000439135	0.000400671	0.000455328	0.000362085	0.000408706			0.0248949	0.028451		0.000400671	0.000408706
NM_008692	316	147	151	149	129	310	219.5		151	390	270.5	197	231	214		0.019822	0.021373	0.0205975	0.0214215	0.0292591	0.0253403		0.000316145	0.000508198	0.000412172	0.000506777	0.000333234	0.000420005			0.0205975	0.0253403		0.000412172	0.000420005
NM_001048168	316	147	151	149	129	310	219.5		151	390	270.5	197	231	214		0.019822	0.021373	0.0205975	0.0214215	0.0292591	0.0253403		0.000316145	0.000508198	0.000412172	0.000506777	0.000333234	0.000420005			0.0205975	0.0253403		0.000412172	0.000420005
NM_001134383	942	115	105	110	85	97	91		141	746	443.5	120	311	215.5		0.015507	0.014862	0.0151845	0.0141149	0.00915526	0.0116351		0.000295208	0.000972092	0.00063365	0.000308697	0.000448639	0.000378668			0.0151845	0.0116351		0.00063365	0.000378668
NM_026322	214	102	134	118	98	194	146		184	253	218.5	222	212	217		0.013754	0.0189667	0.0163604	0.0162737	0.0183105	0.0172921		0.000385236	0.000329677	0.000357457	0.000571089	0.000305825	0.000438457			0.0163604	0.0172921		0.000357457	0.000438457
NM_001253712	214	102	134	118	98	194	146		184	253	218.5	222	212	217		0.013754	0.0189667	0.0163604	0.0162737	0.0183105	0.0172921		0.000385236	0.000329677	0.000357457	0.000571089	0.000305825	0.000438457			0.0163604	0.0172921		0.000357457	0.000438457
NM_010315	52	87	113	100	76	199	137.5		195	277	236	200	234	217		0.0117314	0.0159943	0.0138629	0.0126204	0.0187824	0.0157014		0.000408267	0.000360951	0.000384609	0.000514495	0.000337562	0.000426028			0.0138629	0.0157014		0.000384609	0.000426028
NM_001038637	52	87	113	100	76	199	137.5		195	277	236	200	234	217		0.0117314	0.0159943	0.0138629	0.0126204	0.0187824	0.0157014		0.000408267	0.000360951	0.000384609	0.000514495	0.000337562	0.000426028			0.0138629	0.0157014		0.000384609	0.000426028
NM_001134384	1080	116	109	112.5	89	106	97.5		141	751	446	123	312	217.5		0.0156419	0.0154282	0.015535	0.0147791	0.0100047	0.0123919		0.000295208	0.000978607	0.000636908	0.000316414	0.000450082	0.000383248			0.015535	0.0123919		0.000636908	0.000383248
NM_009272	283	143	210	176.5	123	182	152.5		146	557	351.5	211	226	218.5		0.0192826	0.029724	0.0245033	0.0204251	0.0171779	0.0188015		0.000305677	0.000725811	0.000515744	0.000542792	0.000326021	0.000434406			0.0245033	0.0188015		0.000515744	0.000434406
NM_019484	199	185	71	128	239	124	181.5		199	92	145.5	374	64	219		0.0249461	0.0100495	0.0174978	0.0396878	0.0117036	0.0256957		0.000416641	0.000119883	0.000268262	0.000962105	9.23245e-05	0.000527215			0.0174978	0.0256957		0.000268262	0.000527215
NM_016791	684	83	142	112.5	62	175	118.5		104	963	533.5	74	364	219		0.011192	0.0200991	0.0156455	0.0102956	0.0165172	0.0134064		0.000217742	0.00125486	0.000736301	0.000190363	0.000525096	0.000357729			0.0156455	0.0134064		0.000736301	0.000357729
NM_001164109	698	81	143	112	62	175	118.5		104	968	536	74	364	219		0.0109223	0.0202406	0.0155815	0.0102956	0.0165172	0.0134064		0.000217742	0.00126137	0.000739558	0.000190363	0.000525096	0.000357729			0.0155815	0.0134064		0.000739558	0.000357729
NM_010760	127	271	233	252	270	322	296		154	225	189.5	207	233	220		0.0365426	0.0329795	0.034761	0.0448356	0.0303917	0.0376136		0.000322426	0.000293191	0.000307809	0.000532502	0.000336119	0.00043431			0.034761	0.0376136		0.000307809	0.00043431
NM_008153	352	30	213	121.5	17	289	153		23	563	293	27	413	220		0.00404531	0.0301486	0.017097	0.00282298	0.027277	0.01505		4.81545e-05	0.00073363	0.000390892	6.94568e-05	0.000595782	0.000332619			0.017097	0.01505		0.000390892	0.000332619
NM_001008542	276	154	166	160	48	109	78.5		557	630	593.5	238	202	220		0.0207659	0.0234961	0.022131	0.00797077	0.0102879	0.00912932		0.00116618	0.000820936	0.000993556	0.000612249	0.000291399	0.000451824			0.022131	0.00912932		0.000993556	0.000451824
NM_011076	1257	154	113	133.5	123	162	142.5		333	145	239	235	206	220.5		0.0207659	0.0159943	0.0183801	0.0204251	0.0152902	0.0178577		0.000697194	0.000188946	0.00044307	0.000604531	0.00029717	0.00045085			0.0183801	0.0178577		0.00044307	0.00045085
NM_025997	100	101	111	106	64	172	118		132	240	186	194	250	222		0.0136192	0.0157113	0.0146652	0.0106277	0.0162341	0.0134309		0.000276365	0.000312737	0.000294551	0.00049906	0.000360643	0.000429851			0.0146652	0.0134309		0.000294551	0.000429851
NM_023202	94	152	341	246.5	137	649	393		266	265	265.5	282	164	223		0.0204962	0.0482661	0.0343812	0.0227499	0.0612553	0.0420026		0.000556918	0.000345314	0.000451116	0.000725437	0.000236582	0.000481009			0.0343812	0.0420026		0.000451116	0.000481009
NM_146165	261	106	182	144	125	123	124		349	435	392	281	166	223.5		0.0142934	0.0257608	0.0200271	0.0207572	0.0116092	0.0161832		0.000730693	0.000566837	0.000648765	0.000722865	0.000239467	0.000481166			0.0200271	0.0161832		0.000648765	0.000481166
NM_007570	139	146	189	167.5	67	89	78		602	525	563.5	293	155	224		0.0196872	0.0267516	0.0232194	0.0111259	0.00840019	0.00976303		0.00126039	0.000684113	0.000972253	0.000753735	0.000223598	0.000488667			0.0232194	0.00976303		0.000972253	0.000488667
NM_007533	427	76	125	100.5	82	203	142.5		228	346	287	203	246	224.5		0.0102481	0.0176929	0.0139705	0.0136167	0.01916	0.0163884		0.000477358	0.000450863	0.000464111	0.000522212	0.000354872	0.000438542			0.0139705	0.0163884		0.000464111	0.000438542
NM_028207	166	138	214	176	109	216	162.5		155	496	325.5	164	286	225		0.0186084	0.0302902	0.0244493	0.0181003	0.020387	0.0192436		0.00032452	0.000646324	0.000485422	0.000421886	0.000412575	0.00041723			0.0244493	0.0192436		0.000485422	0.00041723
NM_021565	489	100	180	140	107	198	152.5		136	572	354	175	276	225.5		0.0134844	0.0254777	0.019481	0.0177682	0.0186881	0.0182281		0.00028474	0.000745357	0.000515049	0.000450183	0.000398149	0.000424166			0.019481	0.0182281		0.000515049	0.000424166
NM_011722	171	140	163	151.5	114	258	186		111	245	178	192	260	226		0.0188781	0.0230715	0.0209748	0.0189306	0.0243511	0.0216408		0.000232398	0.000319253	0.000275825	0.000493915	0.000375068	0.000434492			0.0209748	0.0216408		0.000275825	0.000434492
NM_133943	350	115	161	138	102	121	111.5		274	526	400	237	215	226		0.015507	0.0227884	0.0191477	0.0169379	0.0114205	0.0141792		0.000573667	0.000685416	0.000629542	0.000609676	0.000310153	0.000459914			0.0191477	0.0141792		0.000629542	0.000459914
NM_178923	1190	133	146	139.5	147	161	154		176	684	430	122	330	226		0.0179342	0.0206653	0.0192997	0.0244105	0.0151958	0.0198032		0.000368487	0.000891302	0.000629894	0.000313842	0.000476048	0.000394945			0.0192997	0.0198032		0.000629894	0.000394945
NM_019402	283	102	133	117.5	161	193	177		59	524	291.5	137	317	227		0.013754	0.0188252	0.0162896	0.0267353	0.0182161	0.0224757		0.000123527	0.00068281	0.000403168	0.000352429	0.000457295	0.000404862			0.0162896	0.0224757		0.000403168	0.000404862
NM_133346	399	94	137	115.5	142	186	164		171	358	264.5	307	148	227.5		0.0126753	0.0193914	0.0160333	0.0235802	0.0175555	0.0205678		0.000358018	0.0004665	0.000412259	0.000789749	0.0002135	0.000501625			0.0160333	0.0205678		0.000412259	0.000501625
NM_173742	79	407	612	509.5	370	803	586.5		187	290	238.5	190	266	228		0.0548813	0.0866242	0.0707528	0.0614414	0.0757905	0.0686159		0.000391517	0.000377891	0.000384704	0.00048877	0.000383724	0.000436247			0.0707528	0.0686159		0.000384704	0.000436247
NM_009142	376	210	114	162	173	292	232.5		246	241	243.5	205	251	228		0.0283172	0.0161359	0.0222265	0.028728	0.0275602	0.0281441		0.000515044	0.00031404	0.000414542	0.000527357	0.000362085	0.000444721			0.0222265	0.0281441		0.000414542	0.000444721
NM_198296	670	128	107	117.5	129	91	110		215	658	436.5	180	277	228.5		0.01726	0.0151451	0.0162025	0.0214215	0.00858896	0.0150052		0.00045014	0.000857422	0.000653781	0.000463045	0.000399592	0.000431319			0.0162025	0.0150052		0.000653781	0.000431319
NM_001252653	539	418	329	373.5	406	424	415		156	439	297.5	161	297	229		0.0563646	0.0465676	0.0514661	0.0674195	0.0400189	0.0537192		0.000326613	0.000572049	0.000449331	0.000414168	0.000428443	0.000421306			0.0514661	0.0537192		0.000449331	0.000421306
NM_172457	198	162	181	171.5	139	177	158		289	469	379	255	203	229		0.0218447	0.0256192	0.023732	0.023082	0.016706	0.019894		0.000605072	0.000611141	0.000608107	0.000655981	0.000292842	0.000474411			0.023732	0.019894		0.000608107	0.000474411
NM_001161371	294	114	128	121	107	204	155.5		247	286	266.5	196	263	229.5		0.0153722	0.0181175	0.0167448	0.0177682	0.0192544	0.0185113		0.000517138	0.000372679	0.000444908	0.000504205	0.000379396	0.0004418			0.0167448	0.0185113		0.000444908	0.0004418
NM_145996	513	169	170	169.5	68	338	203		624	666	645	126	333	229.5		0.0227886	0.0240623	0.0234254	0.0112919	0.0319018	0.0215969		0.00130645	0.000867846	0.00108715	0.000324132	0.000480376	0.000402254			0.0234254	0.0215969		0.00108715	0.000402254
NM_178798	496	163	135	149	100	70	85		438	821	629.5	278	182	230		0.0219795	0.0191083	0.0205439	0.0166058	0.00660689	0.0116063		0.00091703	0.00106982	0.000993426	0.000715147	0.000262548	0.000488848			0.0205439	0.0116063		0.000993426	0.000488848
NM_029607	209	167	161	164	157	296	226.5		116	294	205	160	301	230.5		0.0225189	0.0227884	0.0226536	0.0260711	0.0279377	0.0270044		0.000242866	0.000383103	0.000312985	0.000411596	0.000434214	0.000422905			0.0226536	0.0270044		0.000312985	0.000422905
NM_001164111	794	90	147	118.5	66	181	123.5		106	980	543	87	374	230.5		0.0121359	0.0208068	0.0164714	0.0109598	0.0170835	0.0140217		0.00022193	0.00127701	0.00074947	0.000223805	0.000539521	0.000381663			0.0164714	0.0140217		0.00074947	0.000381663
NM_198429	808	88	148	118	66	181	123.5		106	985	545.5	87	374	230.5		0.0118662	0.0209483	0.0164073	0.0109598	0.0170835	0.0140217		0.00022193	0.00128353	0.000752728	0.000223805	0.000539521	0.000381663			0.0164073	0.0140217		0.000752728	0.000381663
NM_008425	409	409	237	323	120	223	171.5		308	838	573	133	328	230.5		0.055151	0.0335456	0.0443483	0.0199269	0.0210477	0.0204873		0.000644852	0.00109197	0.000868413	0.000342139	0.000473163	0.000407651			0.0443483	0.0204873		0.000868413	0.000407651
NM_010499	202	499	602	550.5	135	145	140		1174	901	1037.5	371	90	230.5		0.0672869	0.0852088	0.0762479	0.0224178	0.0136857	0.0180518		0.00245797	0.00117407	0.00181602	0.000954387	0.000129831	0.000542109			0.0762479	0.0180518		0.00181602	0.000542109
NM_153570	497	100	151	125.5	102	165	133.5		195	470	332.5	203	259	231		0.0134844	0.021373	0.0174287	0.0169379	0.0155734	0.0162556		0.000408267	0.000612444	0.000510355	0.000522212	0.000373626	0.000447919			0.0174287	0.0162556		0.000510355	0.000447919
NM_172588	442	121	96	108.5	63	94	78.5		286	475	380.5	202	260	231		0.0163161	0.0135881	0.0149521	0.0104616	0.00887211	0.00966688		0.000598791	0.000618959	0.000608875	0.00051964	0.000375068	0.000447354			0.0149521	0.00966688		0.000608875	0.000447354
NM_001033294	668	79	128	103.5	80	88	84		177	657	417	223	240	231.5		0.0106526	0.0181175	0.0143851	0.0132846	0.0083058	0.0107952		0.000370581	0.000856119	0.00061335	0.000573661	0.000346217	0.000459939			0.0143851	0.0107952		0.00061335	0.000459939
NM_001037717	438	95	130	112.5	67	133	100		315	708	511.5	185	279	232		0.0128101	0.0184006	0.0156054	0.0111259	0.0125531	0.0118395		0.000659508	0.000922575	0.000791042	0.000475908	0.000402477	0.000439192			0.0156054	0.0118395		0.000791042	0.000439192
NM_152822	740	145	145	145	109	87	98		197	596	396.5	217	250	233.5		0.0195523	0.0205237	0.020038	0.0181003	0.00821142	0.0131559		0.000412454	0.000776631	0.000594543	0.000558227	0.000360643	0.000459435			0.020038	0.0131559		0.000594543	0.000459435
NM_001001806	465	100	137	118.5	94	137	115.5		250	1086	668	147	321	234		0.0134844	0.0193914	0.0164379	0.0156094	0.0129306	0.01427		0.000523419	0.00141514	0.000969278	0.000378154	0.000463065	0.000420609			0.0164379	0.01427		0.000969278	0.000420609
NM_007899	540	425	332	378.5	415	428	421.5		157	444	300.5	166	303	234.5		0.0573085	0.0469922	0.0521504	0.068914	0.0403964	0.0546552		0.000328707	0.000578564	0.000453636	0.000427031	0.000437099	0.000432065			0.0521504	0.0546552		0.000453636	0.000432065
NM_001164112	906	94	148	121	66	185	125.5		106	996	551	87	382	234.5		0.0126753	0.0209483	0.0168118	0.0109598	0.0174611	0.0142104		0.00022193	0.00129786	0.000759895	0.000223805	0.000551062	0.000387434			0.0168118	0.0142104		0.000759895	0.000387434
NM_001164110	920	92	149	120.5	66	185	125.5		106	1001	553.5	87	382	234.5		0.0124056	0.0210899	0.0167477	0.0109598	0.0174611	0.0142104		0.00022193	0.00130438	0.000763153	0.000223805	0.000551062	0.000387434			0.0167477	0.0142104		0.000763153	0.000387434
NM_008730	413	147	95	121	81	156	118.5		356	351	353.5	264	206	235		0.019822	0.0134466	0.0166343	0.0134507	0.0147239	0.0140873		0.000745348	0.000457378	0.000601363	0.000679133	0.00029717	0.000488151			0.0166343	0.0140873		0.000601363	0.000488151
NM_001166546	99	215	377	296	152	714	433		182	335	258.5	170	301	235.5		0.0289914	0.0533616	0.0411765	0.0252408	0.0673903	0.0463155		0.000381049	0.000436529	0.000408789	0.00043732	0.000434214	0.000435767			0.0411765	0.0463155		0.000408789	0.000435767
NM_026435	66	155	279	217	158	340	249		138	368	253	121	352	236.5		0.0209008	0.0394904	0.0301956	0.0262371	0.0320906	0.0291639		0.000288927	0.000479531	0.000384229	0.000311269	0.000507785	0.000409527			0.0301956	0.0291639		0.000384229	0.000409527
NM_001161111	151	143	203	173	143	202	172.5		214	343	278.5	185	291	238		0.0192826	0.0287332	0.0240079	0.0237463	0.0190656	0.0214059		0.000448046	0.000446954	0.0004475	0.000475908	0.000419788	0.000447848			0.0240079	0.0214059		0.0004475	0.000447848
NM_001178013	262	112	171	141.5	76	106	91		235	824	529.5	227	249	238		0.0151025	0.0242038	0.0196532	0.0126204	0.0100047	0.0113126		0.000492014	0.00107373	0.000782873	0.000583951	0.0003592	0.000471576			0.0196532	0.0113126		0.000782873	0.000471576
NM_001122780	570	157	181	169	80	147	113.5		396	817	606.5	202	275	238.5		0.0211704	0.0256192	0.0233948	0.0132846	0.0138745	0.0135795		0.000829095	0.00106461	0.000946853	0.00051964	0.000396707	0.000458173			0.0233948	0.0135795		0.000946853	0.000458173
NM_029652	570	157	181	169	80	147	113.5		396	817	606.5	202	275	238.5		0.0211704	0.0256192	0.0233948	0.0132846	0.0138745	0.0135795		0.000829095	0.00106461	0.000946853	0.00051964	0.000396707	0.000458173			0.0233948	0.0135795		0.000946853	0.000458173
NM_001002898	372	167	48	107.5	164	46	105		377	120	248.5	395	85	240		0.0225189	0.00679406	0.0146565	0.0272335	0.00434167	0.0157876		0.000789316	0.000156369	0.000472842	0.00101613	0.000122618	0.000569373			0.0146565	0.0157876		0.000472842	0.000569373
NM_182782	570	157	181	169	80	147	113.5		393	757	575	209	271	240		0.0211704	0.0256192	0.0233948	0.0132846	0.0138745	0.0135795		0.000822814	0.000986426	0.00090462	0.000537647	0.000390937	0.000464292			0.0233948	0.0135795		0.00090462	0.000464292
NM_011432	140	103	217	160	154	496	325		175	309	242	244	238	241		0.0138889	0.0307148	0.0223018	0.0255729	0.0468145	0.0361937		0.000366393	0.000402649	0.000384521	0.000627683	0.000343332	0.000485508			0.0223018	0.0361937		0.000384521	0.000485508
NM_175645	934	198	164	181	96	205	150.5		177	504	340.5	182	300	241		0.026699	0.023213	0.024956	0.0159415	0.0193487	0.0176451		0.000370581	0.000656749	0.000513665	0.00046819	0.000432771	0.000450481			0.024956	0.0176451		0.000513665	0.000450481
NM_001177868	1272	78	133	105.5	80	147	113.5		162	834	498	132	353	242.5		0.0105178	0.0188252	0.0146715	0.0132846	0.0138745	0.0135795		0.000339175	0.00108676	0.000712969	0.000339566	0.000509227	0.000424397			0.0146715	0.0135795		0.000712969	0.000424397
NM_026830	1272	78	133	105.5	80	147	113.5		162	834	498	132	353	242.5		0.0105178	0.0188252	0.0146715	0.0132846	0.0138745	0.0135795		0.000339175	0.00108676	0.000712969	0.000339566	0.000509227	0.000424397			0.0146715	0.0135795		0.000712969	0.000424397
NM_001039188	1272	78	133	105.5	80	147	113.5		162	834	498	132	353	242.5		0.0105178	0.0188252	0.0146715	0.0132846	0.0138745	0.0135795		0.000339175	0.00108676	0.000712969	0.000339566	0.000509227	0.000424397			0.0146715	0.0135795		0.000712969	0.000424397
NM_181280	355	224	229	226.5	238	240	239		112	498	305	158	328	243		0.030205	0.0324133	0.0313091	0.0395218	0.0226522	0.031087		0.000234492	0.00064893	0.000441711	0.000406451	0.000473163	0.000439807			0.0313091	0.031087		0.000441711	0.000439807
NM_001033393	477	221	311	266	127	349	238		211	730	470.5	162	326	244		0.0298004	0.0440198	0.0369101	0.0210893	0.0329401	0.0270147		0.000441765	0.000951243	0.000696504	0.000416741	0.000470278	0.000443509			0.0369101	0.0270147		0.000696504	0.000443509
NM_009720	49	423	506	464.5	297	978	637.5		366	188	277	373	116	244.5		0.0570388	0.0716207	0.0643298	0.0493192	0.0923077	0.0708134		0.000766285	0.000244978	0.000505631	0.000959532	0.000167338	0.000563435			0.0643298	0.0708134		0.000505631	0.000563435
NM_028779	779	120	182	151	86	97	91.5		330	940	635	246	243	244.5		0.0161812	0.0257608	0.020971	0.014281	0.00915526	0.0117181		0.000690913	0.00122489	0.0009579	0.000632828	0.000350545	0.000491686			0.020971	0.0117181		0.0009579	0.000491686
NM_001253848	313	103	101	102	77	180	128.5		43	441	242	25	465	245		0.0138889	0.0142958	0.0140924	0.0127864	0.0169891	0.0148878		9.0028e-05	0.000574655	0.000332342	6.43118e-05	0.000670795	0.000367554			0.0140924	0.0148878		0.000332342	0.000367554
NM_054055	581	184	110	147	128	99	113.5		382	471	426.5	297	193	245		0.0248112	0.0155697	0.0201905	0.0212554	0.00934403	0.0152997		0.000799784	0.000613747	0.000706766	0.000764024	0.000278416	0.00052122			0.0201905	0.0152997		0.000706766	0.00052122
NM_001044384	186	63	390	226.5	99	184	141.5		235	1009	622	245	247	246		0.00849515	0.0552017	0.0318484	0.0164397	0.0173667	0.0169032		0.000492014	0.0013148	0.000903407	0.000630256	0.000356315	0.000493285			0.0318484	0.0169032		0.000903407	0.000493285
NM_011593	186	63	390	226.5	99	184	141.5		235	1009	622	245	247	246		0.00849515	0.0552017	0.0318484	0.0164397	0.0173667	0.0169032		0.000492014	0.0013148	0.000903407	0.000630256	0.000356315	0.000493285			0.0318484	0.0169032		0.000903407	0.000493285
NM_001252067	621	84	116	100	113	126	119.5		158	361	259.5	179	314	246.5		0.0113269	0.016419	0.0138729	0.0187645	0.0118924	0.0153285		0.000330801	0.000470409	0.000400605	0.000460473	0.000452967	0.00045672			0.0138729	0.0153285		0.000400605	0.00045672
NM_139149	499	1278	1639	1458.5	1574	2453	2013.5		130	423	276.5	189	305	247		0.17233	0.231989	0.202159	0.261375	0.231524	0.24645		0.000272178	0.0005512	0.000411689	0.000486197	0.000439984	0.000463091			0.202159	0.24645		0.000411689	0.000463091
NM_009606	358	5229	14304	9766.5	4812	13493	9152.5		458	4	231	491	4	247.5		0.705097	2.02463	1.36486	0.79907	1.27353	1.0363		0.000958903	5.21229e-06	0.000482058	0.00126308	5.77028e-06	0.000634427			1.36486	1.0363		0.000482058	0.000634427
NM_028189	353	123	156	139.5	156	273	214.5		278	396	337	231	265	248		0.0165858	0.0220807	0.0193332	0.025905	0.0257669	0.0258359		0.000582042	0.000516017	0.000549029	0.000594241	0.000382281	0.000488261			0.0193332	0.0258359		0.000549029	0.000488261
NM_013866	367	107	117	112	91	229	160		29	409	219	27	470	248.5		0.0144283	0.0165605	0.0154944	0.0151113	0.021614	0.0183626		6.07166e-05	0.000532957	0.000296837	6.94568e-05	0.000678008	0.000373732			0.0154944	0.0183626		0.000296837	0.000373732
NM_133679	329	107	147	127	172	212	192		135	391	263	247	252	249.5		0.0144283	0.0208068	0.0176175	0.0285619	0.0200094	0.0242857		0.000282646	0.000509501	0.000396074	0.000635401	0.000363528	0.000499464			0.0176175	0.0242857		0.000396074	0.000499464
NM_013535	107	65	159	112	70	268	169		411	167	289	419	81	250		0.00876483	0.0225053	0.0156351	0.011624	0.025295	0.0184595		0.000860501	0.000217613	0.000539057	0.00107787	0.000116848	0.000597357			0.0156351	0.0184595		0.000539057	0.000597357
NM_001190320	160	146	86	116	142	60	101		539	279	409	374	126	250		0.0196872	0.0121727	0.0159299	0.0235802	0.00566305	0.0146216		0.00112849	0.000363557	0.000746024	0.000962105	0.000181764	0.000571934			0.0159299	0.0146216		0.000746024	0.000571934
NM_001172146	301	112	199	155.5	126	144	135		405	477	441	321	180	250.5		0.0151025	0.028167	0.0216348	0.0209233	0.0135913	0.0172573		0.000847938	0.000621566	0.000734752	0.000825764	0.000259663	0.000542713			0.0216348	0.0172573		0.000734752	0.000542713
NM_001159745	247	133	144	138.5	275	283	279		80	312	196	128	375	251.5		0.0179342	0.0203822	0.0191582	0.0456659	0.0267107	0.0361883		0.000167494	0.000406559	0.000287026	0.000329277	0.000540964	0.00043512			0.0191582	0.0361883		0.000287026	0.00043512
NM_001024932	206	408	260	334	518	183	350.5		357	184	270.5	390	114	252		0.0550162	0.0368011	0.0459087	0.0860179	0.0172723	0.0516451		0.000747442	0.000239765	0.000493604	0.00100326	0.000164453	0.000583859			0.0459087	0.0516451		0.000493604	0.000583859
NM_010249	329	164	133	148.5	91	152	121.5		292	474	383	210	294	252		0.0221143	0.0188252	0.0204698	0.0151113	0.0143464	0.0147288		0.000611353	0.000617656	0.000614505	0.000540219	0.000424116	0.000482168			0.0204698	0.0147288		0.000614505	0.000482168
NM_001198561	196	1576	1018	1297	1437	2063	1750		602	396	499	390	114	252		0.212513	0.144091	0.178302	0.238625	0.194714	0.21667		0.00126039	0.000516017	0.000888205	0.00100326	0.000164453	0.000583859			0.178302	0.21667		0.000888205	0.000583859
NM_001111016	2352	139	148	143.5	83	201	142		206	804	505	70	434	252		0.0187433	0.0209483	0.0198458	0.0137828	0.0189712	0.016377		0.000431297	0.00104767	0.000739484	0.000180073	0.000626076	0.000403074			0.0198458	0.016377		0.000739484	0.000403074
NM_001025427	88	255	477	366	179	751	465		205	410	307.5	158	349	253.5		0.0343851	0.0675159	0.0509505	0.0297243	0.0708825	0.0503034		0.000429203	0.00053426	0.000481732	0.000406451	0.000503457	0.000454954			0.0509505	0.0503034		0.000481732	0.000454954
NM_016660	88	255	477	366	179	751	465		205	410	307.5	158	349	253.5		0.0343851	0.0675159	0.0509505	0.0297243	0.0708825	0.0503034		0.000429203	0.00053426	0.000481732	0.000406451	0.000503457	0.000454954			0.0509505	0.0503034		0.000481732	0.000454954
NM_001166476	88	255	477	366	179	751	465		205	410	307.5	158	349	253.5		0.0343851	0.0675159	0.0509505	0.0297243	0.0708825	0.0503034		0.000429203	0.00053426	0.000481732	0.000406451	0.000503457	0.000454954			0.0509505	0.0503034		0.000481732	0.000454954
NM_001166535	88	255	477	366	179	751	465		205	410	307.5	158	349	253.5		0.0343851	0.0675159	0.0509505	0.0297243	0.0708825	0.0503034		0.000429203	0.00053426	0.000481732	0.000406451	0.000503457	0.000454954			0.0509505	0.0503034		0.000481732	0.000454954
NM_001166536	88	255	477	366	179	751	465		205	410	307.5	158	349	253.5		0.0343851	0.0675159	0.0509505	0.0297243	0.0708825	0.0503034		0.000429203	0.00053426	0.000481732	0.000406451	0.000503457	0.000454954			0.0509505	0.0503034		0.000481732	0.000454954
NM_001039356	88	255	477	366	179	751	465		205	410	307.5	158	349	253.5		0.0343851	0.0675159	0.0509505	0.0297243	0.0708825	0.0503034		0.000429203	0.00053426	0.000481732	0.000406451	0.000503457	0.000454954			0.0509505	0.0503034		0.000481732	0.000454954
NM_001145896	1194	108	111	109.5	51	183	117		97	550	323.5	48	459	253.5		0.0145631	0.0157113	0.0151372	0.00846895	0.0172723	0.0128706		0.000203086	0.00071669	0.000459888	0.000123479	0.00066214	0.000392809			0.0151372	0.0128706		0.000459888	0.000392809
NM_001145897	1191	108	111	109.5	51	182	116.5		97	550	323.5	48	459	253.5		0.0145631	0.0157113	0.0151372	0.00846895	0.0171779	0.0128234		0.000203086	0.00071669	0.000459888	0.000123479	0.00066214	0.000392809			0.0151372	0.0128234		0.000459888	0.000392809
NM_198671	1204	108	111	109.5	51	184	117.5		97	550	323.5	48	459	253.5		0.0145631	0.0157113	0.0151372	0.00846895	0.0173667	0.0129178		0.000203086	0.00071669	0.000459888	0.000123479	0.00066214	0.000392809			0.0151372	0.0129178		0.000459888	0.000392809
NM_207669	363	155	137	146	98	159	128.5		292	489	390.5	212	296	254		0.0209008	0.0193914	0.0201461	0.0162737	0.0150071	0.0156404		0.000611353	0.000637202	0.000624278	0.000545364	0.000427001	0.000486183			0.0201461	0.0156404		0.000624278	0.000486183
NM_009878	147	142	126	134	115	162	138.5		237	320	278.5	298	211	254.5		0.0191478	0.0178344	0.0184911	0.0190966	0.0152902	0.0171934		0.000496201	0.000416983	0.000456592	0.000766597	0.000304382	0.00053549			0.0184911	0.0171934		0.000456592	0.00053549
NM_153419	427	108	108	108	119	160	139.5		301	399	350	326	185	255.5		0.0145631	0.0152866	0.0149249	0.0197609	0.0151015	0.0174312		0.000630196	0.000519926	0.000575061	0.000838626	0.000266876	0.000552751			0.0149249	0.0174312		0.000575061	0.000552751
NM_007455	772	97	166	131.5	117	157	137		247	448	347.5	304	208	256		0.0130798	0.0234961	0.018288	0.0194288	0.0148183	0.0171235		0.000517138	0.000583776	0.000550457	0.000782032	0.000300055	0.000541043			0.018288	0.0171235		0.000550457	0.000541043
NM_181279	401	224	231	227.5	238	246	242		112	526	319	168	346	257		0.030205	0.0326964	0.0314507	0.0395218	0.0232185	0.0313701		0.000234492	0.000685416	0.000459954	0.000432175	0.000499129	0.000465652			0.0314507	0.0313701		0.000459954	0.000465652
NM_011170	235	98	122	110	54	359	206.5		225	235	230	211	304	257.5		0.0132147	0.0172682	0.0152414	0.00896712	0.0338839	0.0214255		0.000471077	0.000306222	0.000388649	0.000542792	0.000438541	0.000490667			0.0152414	0.0214255		0.000388649	0.000490667
NM_026242	106	183	209	196	142	472	307		196	286	241	282	234	258		0.0246764	0.0295824	0.0271294	0.0235802	0.0445493	0.0340648		0.00041036	0.000372679	0.00039152	0.000725437	0.000337562	0.000531499			0.0271294	0.0340648		0.00039152	0.000531499
NM_145585	331	123	129	126	191	154	172.5		192	409	300.5	245	272	258.5		0.0165858	0.018259	0.0174224	0.031717	0.0145352	0.0231261		0.000401986	0.000532957	0.000467471	0.000630256	0.000392379	0.000511318			0.0174224	0.0231261		0.000467471	0.000511318
NM_001040106	940	94	106	100	104	154	129		52	542	297	79	439	259		0.0126753	0.0150035	0.0138394	0.01727	0.0145352	0.0159026		0.000108871	0.000706265	0.000407568	0.000203225	0.000633288	0.000418257			0.0138394	0.0159026		0.000407568	0.000418257
NM_175272	2413	139	153	146	83	206	144.5		207	807	507	73	446	259.5		0.0187433	0.0216561	0.0201997	0.0137828	0.0194431	0.016613		0.000433391	0.00105158	0.000742485	0.000187791	0.000643386	0.000415588			0.0201997	0.016613		0.000742485	0.000415588
NM_175001	187	73	146	109.5	129	302	215.5		214	308	261	234	286	260		0.00984358	0.0206653	0.0152544	0.0214215	0.028504	0.0249627		0.000448046	0.000401346	0.000424696	0.000601959	0.000412575	0.000507267			0.0152544	0.0249627		0.000424696	0.000507267
NM_010941	343	86	161	123.5	79	142	110.5		165	641	403	145	375	260		0.0115965	0.0227884	0.0171925	0.0131186	0.0134025	0.0132606		0.000345456	0.000835269	0.000590363	0.000373009	0.000540964	0.000456986			0.0171925	0.0132606		0.000590363	0.000456986
NM_001242430	365	121	103	112	156	175	165.5		101	554	327.5	80	441	260.5		0.0163161	0.0145789	0.0154475	0.025905	0.0165172	0.0212111		0.000211461	0.000721902	0.000466682	0.000205798	0.000636174	0.000420986			0.0154475	0.0212111		0.000466682	0.000420986
NM_018759	561	112	101	106.5	162	173	167.5		115	248	181.5	185	337	261		0.0151025	0.0142958	0.0146992	0.0269014	0.0163285	0.0216149		0.000240773	0.000323162	0.000281967	0.000475908	0.000486146	0.000481027			0.0146992	0.0216149		0.000281967	0.000481027
NM_011221	305	167	81	124	151	171	161		70	510	290	84	438	261		0.0225189	0.011465	0.0169919	0.0250747	0.0161397	0.0206072		0.000146557	0.000664567	0.000405562	0.000216088	0.000631846	0.000423967			0.0169919	0.0206072		0.000405562	0.000423967
NM_001172206	570	195	193	194	74	367	220.5		677	791	734	150	373	261.5		0.0262945	0.0273178	0.0268061	0.0122883	0.034639	0.0234636		0.00141742	0.00103073	0.00122407	0.000385871	0.000538079	0.000461975			0.0268061	0.0234636		0.00122407	0.000461975
NM_001172205	571	195	194	194.5	74	367	220.5		677	791	734	150	373	261.5		0.0262945	0.0274593	0.0268769	0.0122883	0.034639	0.0234636		0.00141742	0.00103073	0.00122407	0.000385871	0.000538079	0.000461975			0.0268769	0.0234636		0.00122407	0.000461975
NM_009280	399	142	168	155	149	315	232		270	315	292.5	229	296	262.5		0.0191478	0.0237792	0.0214635	0.0247426	0.029731	0.0272368		0.000565292	0.000410468	0.00048788	0.000589096	0.000427001	0.000508049			0.0214635	0.0272368		0.00048788	0.000508049
NM_031201	302	124	149	136.5	95	186	140.5		224	396	310	302	225	263.5		0.0167206	0.0210899	0.0189052	0.0157755	0.0175555	0.0166655		0.000468983	0.000516017	0.0004925	0.000776887	0.000324578	0.000550733			0.0189052	0.0166655		0.0004925	0.000550733
NM_028769	593	228	348	288	278	404	341		229	607	418	184	343	263.5		0.0307443	0.0492569	0.0400006	0.0461641	0.0381312	0.0421476		0.000479452	0.000790965	0.000635208	0.000473335	0.000494802	0.000484068			0.0400006	0.0421476		0.000635208	0.000484068
NM_001164709	593	228	348	288	278	404	341		229	607	418	184	343	263.5		0.0307443	0.0492569	0.0400006	0.0461641	0.0381312	0.0421476		0.000479452	0.000790965	0.000635208	0.000473335	0.000494802	0.000484068			0.0400006	0.0421476		0.000635208	0.000484068
NM_009848	491	110	215	162.5	59	261	160		362	648	505	133	394	263.5		0.0148328	0.0304317	0.0226322	0.00979741	0.0246343	0.0172158		0.00075791	0.000844391	0.000801151	0.000342139	0.000568373	0.000455256			0.0226322	0.0172158		0.000801151	0.000455256
NM_027427	538	262	301	281.5	311	512	411.5		73	367	220	162	367	264.5		0.035329	0.0426044	0.0389667	0.051644	0.0483247	0.0499843		0.000152838	0.000478228	0.000315533	0.000416741	0.000529423	0.000473082			0.0389667	0.0499843		0.000315533	0.000473082
NM_018819	90	91	280	185.5	112	370	241		225	527	376	170	360	265		0.0122708	0.039632	0.0259514	0.0185985	0.0349221	0.0267603		0.000471077	0.000686719	0.000578898	0.00043732	0.000519325	0.000478323			0.0259514	0.0267603		0.000578898	0.000478323
NM_001134427	90	159	92	125.5	191	163	177		106	408	257	185	346	265.5		0.0214401	0.0130219	0.017231	0.031717	0.0153846	0.0235508		0.00022193	0.000531654	0.000376792	0.000475908	0.000499129	0.000487518			0.017231	0.0235508		0.000376792	0.000487518
NM_009821	368	112	150	131	44	209	126.5		109	727	418	121	411	266		0.0151025	0.0212314	0.018167	0.00730654	0.0197263	0.0135164		0.000228211	0.000947334	0.000587772	0.000311269	0.000592896	0.000452083			0.018167	0.0135164		0.000587772	0.000452083
NM_009649	776	132	85	108.5	89	137	113		263	738	500.5	153	379	266		0.0177994	0.0120311	0.0149152	0.0147791	0.0129306	0.0138549		0.000550637	0.000961668	0.000756152	0.000393588	0.000546734	0.000470161			0.0149152	0.0138549		0.000756152	0.000470161
NM_001178012	269	107	161	134	74	104	89		261	1085	673	244	288	266		0.0144283	0.0227884	0.0186083	0.0122883	0.00981595	0.0110521		0.000546449	0.00141383	0.000980141	0.000627683	0.00041546	0.000521572			0.0186083	0.0110521		0.000980141	0.000521572
NM_178825	210	115	109	112	121	734	427.5		109	116	112.5	237	296	266.5		0.015507	0.0154282	0.0154676	0.020093	0.069278	0.0446855		0.000228211	0.000151156	0.000189684	0.000609676	0.000427001	0.000518338			0.0154676	0.0446855		0.000189684	0.000518338
NM_025389	65	50	154	102	37	212	124.5		332	240	286	308	225	266.5		0.00674218	0.0217976	0.0142699	0.00614414	0.0200094	0.0130768		0.0006951	0.000312737	0.000503919	0.000792322	0.000324578	0.00055845			0.0142699	0.0130768		0.000503919	0.00055845
NM_001038230	65	50	154	102	37	212	124.5		332	240	286	308	225	266.5		0.00674218	0.0217976	0.0142699	0.00614414	0.0200094	0.0130768		0.0006951	0.000312737	0.000503919	0.000792322	0.000324578	0.00055845			0.0142699	0.0130768		0.000503919	0.00055845
NM_025381	100	401	531	466	314	956	635		404	396	400	316	217	266.5		0.0540723	0.0751592	0.0646158	0.0521421	0.0902312	0.0711867		0.000845845	0.000516017	0.000680931	0.000812901	0.000313038	0.00056297			0.0646158	0.0711867		0.000680931	0.00056297
NM_001167914	272	218	228	223	127	198	162.5		252	744	498	93	440	266.5		0.0293959	0.0322718	0.0308338	0.0210893	0.0186881	0.0198887		0.000527606	0.000969486	0.000748546	0.00023924	0.000634731	0.000436986			0.0308338	0.0198887		0.000748546	0.000436986
NM_028181	619	147	68	107.5	110	107	108.5		214	263	238.5	285	249	267		0.019822	0.00962491	0.0147235	0.0182664	0.0100991	0.0141827		0.000448046	0.000342708	0.000395377	0.000733155	0.0003592	0.000546177			0.0147235	0.0141827		0.000395377	0.000546177
NM_173048	699	96	127	111.5	123	145	134		169	386	277.5	198	338	268		0.012945	0.0179759	0.0154605	0.0204251	0.0136857	0.0170554		0.000353831	0.000502986	0.000428409	0.00050935	0.000487589	0.000498469			0.0154605	0.0170554		0.000428409	0.000498469
NM_144918	397	96	128	112	89	151	120		183	452	317.5	212	324	268		0.012945	0.0181175	0.0155312	0.0147791	0.014252	0.0145156		0.000383143	0.000588989	0.000486066	0.000545364	0.000467393	0.000506379			0.0155312	0.0145156		0.000486066	0.000506379
NM_001005867	869	90	134	112	125	179	152		28	931	479.5	93	443	268		0.0121359	0.0189667	0.0155513	0.0207572	0.0168948	0.018826		5.86229e-05	0.00121316	0.000635892	0.00023924	0.000639059	0.000439149			0.0155513	0.018826		0.000635892	0.000439149
NM_009016	234	296	129	212.5	335	161	248		279	242	260.5	323	215	269		0.0399137	0.018259	0.0290864	0.0556294	0.0151958	0.0354126		0.000584135	0.000315344	0.000449739	0.000830909	0.000310153	0.000570531			0.0290864	0.0354126		0.000449739	0.000570531
NM_009017	234	296	129	212.5	335	161	248		279	242	260.5	323	215	269		0.0399137	0.018259	0.0290864	0.0556294	0.0151958	0.0354126		0.000584135	0.000315344	0.000449739	0.000830909	0.000310153	0.000570531			0.0290864	0.0354126		0.000449739	0.000570531
NM_001038846	363	331	133	232	123	121	122		705	639	672	356	182	269		0.0446332	0.0188252	0.0317292	0.0204251	0.0114205	0.0159228		0.00147604	0.000832663	0.00115435	0.0009158	0.000262548	0.000589174			0.0317292	0.0159228		0.00115435	0.000589174
NM_153587	844	145	75	110	90	101	95.5		375	511	443	165	377	271		0.0195523	0.0106157	0.015084	0.0149452	0.0095328	0.012239		0.000785128	0.00066587	0.000725499	0.000424458	0.000543849	0.000484154			0.015084	0.012239		0.000725499	0.000484154
NM_025826	413	143	154	148.5	174	164	169		154	499	326.5	228	315	271.5		0.0192826	0.0217976	0.0205401	0.0288941	0.015479	0.0221865		0.000322426	0.000650233	0.00048633	0.000586524	0.00045441	0.000520467			0.0205401	0.0221865		0.00048633	0.000520467
NM_001205287	399	307	218	262.5	55	51	53		1264	1423	1343.5	255	288	271.5		0.041397	0.0308563	0.0361267	0.00913318	0.00481359	0.00697338		0.00264641	0.00185427	0.00225034	0.000655981	0.00041546	0.00053572			0.0361267	0.00697338		0.00225034	0.00053572
NM_009018	232	223	97	160	255	132	193.5		370	200	285	332	212	272		0.0300701	0.0137297	0.0218999	0.0423447	0.0124587	0.0274017		0.00077466	0.000260615	0.000517637	0.000854061	0.000305825	0.000579943			0.0218999	0.0274017		0.000517637	0.000579943
NM_198193	232	223	97	160	255	132	193.5		370	200	285	332	212	272		0.0300701	0.0137297	0.0218999	0.0423447	0.0124587	0.0274017		0.00077466	0.000260615	0.000517637	0.000854061	0.000305825	0.000579943			0.0218999	0.0274017		0.000517637	0.000579943
NM_001008425	322	56	152	104	95	204	149.5		269	286	277.5	324	221	272.5		0.00755124	0.0215145	0.0145329	0.0157755	0.0192544	0.0175149		0.000563199	0.000372679	0.000467939	0.000833481	0.000318808	0.000576145			0.0145329	0.0175149		0.000467939	0.000576145
NM_145505	745	94	149	121.5	80	151	115.5		124	659	391.5	175	371	273		0.0126753	0.0210899	0.0168826	0.0132846	0.014252	0.0137683		0.000259616	0.000858725	0.00055917	0.000450183	0.000535194	0.000492688			0.0168826	0.0137683		0.00055917	0.000492688
NM_001035533	874	134	90	112	83	139	111		265	748	506.5	148	398	273		0.018069	0.0127389	0.0154039	0.0137828	0.0131194	0.0134511		0.000554824	0.000974698	0.000764761	0.000380726	0.000574143	0.000477435			0.0154039	0.0134511		0.000764761	0.000477435
NM_001035532	861	134	91	112.5	83	139	111		272	754	513	148	399	273.5		0.018069	0.0128804	0.0154747	0.0137828	0.0131194	0.0134511		0.00056948	0.000982517	0.000775998	0.000380726	0.000575586	0.000478156			0.0154747	0.0134511		0.000775998	0.000478156
NM_172758	444	140	86	113	127	118	122.5		396	312	354	366	182	274		0.0188781	0.0121727	0.0155254	0.0210893	0.0111373	0.0161133		0.000829095	0.000406559	0.000617827	0.000941525	0.000262548	0.000602036			0.0155254	0.0161133		0.000617827	0.000602036
NM_026772	195	183	214	198.5	109	158	133.5		368	508	438	371	177	274		0.0246764	0.0302902	0.0274833	0.0181003	0.0149127	0.0165065		0.000770472	0.000661961	0.000716217	0.000954387	0.000255335	0.000604861			0.0274833	0.0165065		0.000716217	0.000604861
NM_145391	432	131	94	112.5	93	305	199		278	334	306	240	311	275.5		0.0176645	0.013305	0.0154848	0.0154434	0.0287872	0.0221153		0.000582042	0.000435226	0.000508634	0.000617394	0.000448639	0.000533016			0.0154848	0.0221153		0.000508634	0.000533016
NM_001111023	432	124	186	155	55	240	147.5		114	756	435	126	425	275.5		0.0167206	0.026327	0.0215238	0.00913318	0.0226522	0.0158927		0.000238679	0.000985123	0.000611901	0.000324132	0.000613092	0.000468612			0.0215238	0.0158927		0.000611901	0.000468612
NM_020030	230	336	138	237	354	165	259.5		270	263	266.5	326	226	276		0.0453074	0.0195329	0.0324202	0.0587845	0.0155734	0.0371789		0.000565292	0.000342708	0.000454	0.000838626	0.000326021	0.000582324			0.0324202	0.0371789		0.000454	0.000582324
NM_025315	125	321	237	279	371	452	411.5		186	358	272	196	357	276.5		0.0432848	0.0335456	0.0384152	0.0616074	0.0426616	0.0521345		0.000389424	0.0004665	0.000427962	0.000504205	0.000514998	0.000509601			0.0384152	0.0521345		0.000427962	0.000509601
NM_026620	410	249	288	268.5	300	387	343.5		110	487	298.5	164	389	276.5		0.0335761	0.0407643	0.0371702	0.0498173	0.0365267	0.043172		0.000230304	0.000634596	0.00043245	0.000421886	0.00056116	0.000491523			0.0371702	0.043172		0.00043245	0.000491523
NM_001037987	461	193	84	138.5	178	110	144		271	269	270	371	183	277		0.0260248	0.0118896	0.0189572	0.0295583	0.0103823	0.0199703		0.000567386	0.000350527	0.000458956	0.000954387	0.00026399	0.000609189			0.0189572	0.0199703		0.000458956	0.000609189
NM_027342	136	144	280	212	175	283	229		247	408	327.5	280	274	277		0.0194175	0.039632	0.0295247	0.0290601	0.0267107	0.0278854		0.000517138	0.000531654	0.000524396	0.000720292	0.000395264	0.000557778			0.0295247	0.0278854		0.000524396	0.000557778
NM_178593	393	339	148	243.5	126	128	127		721	672	696.5	364	190	277		0.045712	0.0209483	0.0333302	0.0209233	0.0120812	0.0165022		0.00150954	0.000875665	0.0011926	0.00093638	0.000274088	0.000605234			0.0333302	0.0165022		0.0011926	0.000605234
NM_025802	411	118	167	142.5	98	169	133.5		198	517	357.5	235	320	277.5		0.0159115	0.0236377	0.0197746	0.0162737	0.0159509	0.0161123		0.000414548	0.000673688	0.000544118	0.000604531	0.000461623	0.000533077			0.0197746	0.0161123		0.000544118	0.000533077
NM_133349	152	183	74	128.5	44	38	41		432	713	572.5	209	348	278.5		0.0246764	0.0104742	0.0175753	0.00730654	0.0035866	0.00544657		0.000904468	0.000929091	0.000916779	0.000537647	0.000502015	0.000519831			0.0175753	0.00544657		0.000916779	0.000519831
NM_001159908	152	183	74	128.5	44	38	41		432	713	572.5	209	348	278.5		0.0246764	0.0104742	0.0175753	0.00730654	0.0035866	0.00544657		0.000904468	0.000929091	0.000916779	0.000537647	0.000502015	0.000519831			0.0175753	0.00544657		0.000916779	0.000519831
NM_029391	194	159	146	152.5	135	175	155		234	289	261.5	263	295	279		0.0214401	0.0206653	0.0210527	0.0224178	0.0165172	0.0194675		0.00048992	0.000376588	0.000433254	0.00067656	0.000425558	0.000551059			0.0210527	0.0194675		0.000433254	0.000551059
NM_010103	451	192	85	138.5	178	110	144		279	276	277.5	374	184	279		0.02589	0.0120311	0.0189606	0.0295583	0.0103823	0.0199703		0.000584135	0.000359648	0.000471892	0.000962105	0.000265433	0.000613769			0.0189606	0.0199703		0.000471892	0.000613769
NM_009829	270	104	113	108.5	138	281	209.5		94	285	189.5	149	410	279.5		0.0140237	0.0159943	0.015009	0.022916	0.0265219	0.024719		0.000196805	0.000371376	0.000284091	0.000383298	0.000591454	0.000487376			0.015009	0.024719		0.000284091	0.000487376
NM_001030307	490	137	210	173.5	99	79	89		292	1095	693.5	215	344	279.5		0.0184736	0.029724	0.0240988	0.0164397	0.00745635	0.011948		0.000611353	0.00142686	0.00101911	0.000553082	0.000496244	0.000524663			0.0240988	0.011948		0.00101911	0.000524663
NM_026424	173	119	187	153	90	167	128.5		202	615	408.5	180	381	280.5		0.0160464	0.0264685	0.0212574	0.0149452	0.0157622	0.0153537		0.000422922	0.00080139	0.000612156	0.000463045	0.000549619	0.000506332			0.0212574	0.0153537		0.000612156	0.000506332
NM_001145952	594	109	134	121.5	100	200	150		146	733	439.5	99	462	280.5		0.014698	0.0189667	0.0168323	0.0166058	0.0188768	0.0177413		0.000305677	0.000955152	0.000630414	0.000254675	0.000666468	0.000460571			0.0168323	0.0177413		0.000630414	0.000460571
NM_178665	594	109	134	121.5	100	200	150		146	733	439.5	99	462	280.5		0.014698	0.0189667	0.0168323	0.0166058	0.0188768	0.0177413		0.000305677	0.000955152	0.000630414	0.000254675	0.000666468	0.000460571			0.0168323	0.0177413		0.000630414	0.000460571
NM_011284	251	104	113	108.5	135	147	141		131	436	283.5	192	370	281		0.0140237	0.0159943	0.015009	0.0224178	0.0138745	0.0181461		0.000274271	0.00056814	0.000421206	0.000493915	0.000533751	0.000513833			0.015009	0.0181461		0.000421206	0.000513833
NM_008997	199	283	365	324	303	479	391		249	509	379	268	295	281.5		0.0381607	0.0516631	0.0449119	0.0503155	0.04521	0.0477628		0.000521325	0.000663264	0.000592295	0.000689423	0.000425558	0.000557491			0.0449119	0.0477628		0.000592295	0.000557491
NM_028601	901	90	137	113.5	126	181	153.5		39	937	488	94	469	281.5		0.0121359	0.0193914	0.0157636	0.0209233	0.0170835	0.0190034		8.16533e-05	0.00122098	0.000651316	0.000241812	0.000676566	0.000459189			0.0157636	0.0190034		0.000651316	0.000459189
NM_026554	137	99	133	116	93	159	126		335	465	400	315	249	282		0.0133495	0.0188252	0.0160874	0.0154434	0.0150071	0.0152252		0.000701381	0.000605929	0.000653655	0.000810329	0.0003592	0.000584765			0.0160874	0.0152252		0.000653655	0.000584765
NM_001159422	115	86	116	101	113	115	114		210	368	289	427	138	282.5		0.0115965	0.016419	0.0140078	0.0187645	0.0108542	0.0148094		0.000439672	0.000479531	0.000459601	0.00109845	0.000199075	0.00064876			0.0140078	0.0148094		0.000459601	0.00064876
NM_178708	380	91	237	164	129	178	153.5		278	567	422.5	312	253	282.5		0.0122708	0.0335456	0.0229082	0.0214215	0.0168004	0.0191109		0.000582042	0.000738842	0.000660442	0.000802612	0.00036497	0.000583791			0.0229082	0.0191109		0.000660442	0.000583791
NM_001161369	368	138	171	154.5	151	313	232		284	334	309	243	323	283		0.0186084	0.0242038	0.0214061	0.0250747	0.0295422	0.0273085		0.000594604	0.000435226	0.000514915	0.000625111	0.00046595	0.000545531			0.0214061	0.0273085		0.000514915	0.000545531
NM_172911	1354	212	189	200.5	84	85	84.5		660	2462	1561	164	402	283		0.0285868	0.0267516	0.0276692	0.0139489	0.00802265	0.0109858		0.00138183	0.00320816	0.002295	0.000421886	0.000579913	0.000500899			0.0276692	0.0109858		0.002295	0.000500899
NM_198645	125	91	122	106.5	115	126	120.5		212	369	290.5	429	138	283.5		0.0122708	0.0172682	0.0147695	0.0190966	0.0118924	0.0154945		0.000443859	0.000480834	0.000462346	0.00110359	0.000199075	0.000651333			0.0147695	0.0154945		0.000462346	0.000651333
NM_001165971	301	1510	1325	1417.5	1599	1663	1631		165	299	232	289	280	284.5		0.203614	0.187544	0.195579	0.265526	0.156961	0.211244		0.000345456	0.000389619	0.000367538	0.000743445	0.00040392	0.000573682			0.195579	0.211244		0.000367538	0.000573682
NM_025417	180	86	166	126	93	246	169.5		170	401	285.5	277	293	285		0.0115965	0.0234961	0.0175463	0.0154434	0.0232185	0.0193309		0.000355925	0.000522532	0.000439228	0.000712575	0.000422673	0.000567624			0.0175463	0.0193309		0.000439228	0.000567624
NM_019814	76	166	291	228.5	188	281	234.5		315	411	363	385	185	285		0.022384	0.041189	0.0317865	0.0312189	0.0265219	0.0288704		0.000659508	0.000535563	0.000597535	0.000990402	0.000266876	0.000628639			0.0317865	0.0288704		0.000597535	0.000628639
NM_178027	317	94	109	101.5	73	189	131		211	538	374.5	256	314	285		0.0126753	0.0154282	0.0140517	0.0121222	0.0178386	0.0149804		0.000441765	0.000701053	0.000571409	0.000658553	0.000452967	0.00055576			0.0140517	0.0149804		0.000571409	0.00055576
NM_001111022	382	116	154	135	44	217	130.5		116	750	433	135	435	285		0.0156419	0.0217976	0.0187197	0.00730654	0.0204814	0.013894		0.000242866	0.000977304	0.000610085	0.000347284	0.000627518	0.000487401			0.0187197	0.013894		0.000610085	0.000487401
NM_019979	75	352	335	343.5	403	263	333		299	382	340.5	306	267	286.5		0.0474649	0.0474168	0.0474409	0.0669213	0.024823	0.0458722		0.000626009	0.000497774	0.000561891	0.000787177	0.000385166	0.000586172			0.0474409	0.0458722		0.000561891	0.000586172
NM_028127	603	157	106	131.5	37	72	54.5		1071	1461	1266	307	267	287		0.0211704	0.0150035	0.018087	0.00614414	0.00679566	0.0064699		0.00224233	0.00190379	0.00207306	0.000789749	0.000385166	0.000587458			0.018087	0.0064699		0.00207306	0.000587458
NM_010215	611	117	91	104	255	312	283.5		75	194	134.5	362	213	287.5		0.0157767	0.0128804	0.0143285	0.0423447	0.0294479	0.0358963		0.000157026	0.000252796	0.000204911	0.000931235	0.000307268	0.000619251			0.0143285	0.0358963		0.000204911	0.000619251
NM_009344	386	120	259	189.5	128	130	129		123	975	549	210	365	287.5		0.0161812	0.0366596	0.0264204	0.0212554	0.0122699	0.0167627		0.000257522	0.0012705	0.000764009	0.000540219	0.000526538	0.000533379			0.0264204	0.0167627		0.000764009	0.000533379
NM_001037726	268	131	85	108	114	254	184		137	481	309	164	412	288		0.0176645	0.0120311	0.0148478	0.0189306	0.0239736	0.0214521		0.000286834	0.000626778	0.000456806	0.000421886	0.000594339	0.000508112			0.0148478	0.0214521		0.000456806	0.000508112
NM_001171024	619	117	91	104	255	314	284.5		75	195	135	362	215	288.5		0.0157767	0.0128804	0.0143285	0.0423447	0.0296366	0.0359907		0.000157026	0.000254099	0.000205562	0.000931235	0.000310153	0.000620694			0.0143285	0.0359907		0.000205562	0.000620694
NM_009455	174	187	211	199	171	498	334.5		234	311	272.5	186	391	288.5		0.0252157	0.0298655	0.0275406	0.0283959	0.0470033	0.0376996		0.00048992	0.000405256	0.000447588	0.00047848	0.000564045	0.000521263			0.0275406	0.0376996		0.000447588	0.000521263
NM_134048	471	142	137	139.5	93	266	179.5		44	523	283.5	42	535	288.5		0.0191478	0.0193914	0.0192696	0.0154434	0.0251062	0.0202748		9.21217e-05	0.000681507	0.000386814	0.000108044	0.000771775	0.00043991			0.0192696	0.0202748		0.000386814	0.00043991
NM_025498	82	149	230	189.5	117	371	244		358	406	382	311	266	288.5		0.0200917	0.0325548	0.0263233	0.0194288	0.0350165	0.0272226		0.000749536	0.000529047	0.000639292	0.000800039	0.000383724	0.000591881			0.0263233	0.0272226		0.000639292	0.000591881
NM_001042605	260	223	379	301	141	485	313		285	941	613	216	361	288.5		0.0300701	0.0536447	0.0418574	0.0234141	0.0457763	0.0345952		0.000596697	0.00122619	0.000911444	0.000555654	0.000520768	0.000538211			0.0418574	0.0345952		0.000911444	0.000538211
NM_009357	177	127	91	109	76	104	90		354	556	455	284	294	289		0.0171251	0.0128804	0.0150028	0.0126204	0.00981595	0.0112182		0.000741161	0.000724508	0.000732835	0.000730582	0.000424116	0.000577349			0.0150028	0.0112182		0.000732835	0.000577349
NM_145360	264	272	298	285	242	381	311.5		32	462	247	18	561	289.5		0.0366775	0.0421798	0.0394286	0.040186	0.0359604	0.0380732		6.69976e-05	0.00060202	0.000334509	4.63045e-05	0.000809282	0.000427793			0.0394286	0.0380732		0.000334509	0.000427793
NM_145610	451	100	167	133.5	54	83	68.5		393	606	499.5	415	166	290.5		0.0134844	0.0236377	0.018561	0.00896712	0.00783388	0.0084005		0.000822814	0.000789662	0.000806238	0.00106758	0.000239467	0.000653522			0.018561	0.0084005		0.000806238	0.000653522
NM_026277	384	73	138	105.5	113	124	118.5		321	435	378	349	233	291		0.00984358	0.0195329	0.0146882	0.0187645	0.0117036	0.0152341		0.00067207	0.000566837	0.000619453	0.000897793	0.000336119	0.000616956			0.0146882	0.0152341		0.000619453	0.000616956
NM_025387	95	162	289	225.5	164	214	189		295	483	389	290	292	291		0.0218447	0.0409059	0.0313753	0.0272335	0.0201982	0.0237158		0.000617634	0.000629384	0.000623509	0.000746017	0.000421231	0.000583624			0.0313753	0.0237158		0.000623509	0.000583624
NM_010922	187	102	121	111.5	109	119	114		301	478	389.5	372	210	291		0.013754	0.0171267	0.0154404	0.0181003	0.0112317	0.014666		0.000630196	0.000622869	0.000626532	0.00095696	0.00030294	0.00062995			0.0154404	0.014666		0.000626532	0.00062995
NM_194066	231	112	457	284.5	111	309	210		238	971	604.5	295	287	291		0.0151025	0.0646851	0.0398938	0.0184324	0.0291647	0.0237986		0.000498295	0.00126528	0.000881789	0.00075888	0.000414018	0.000586449			0.0398938	0.0237986		0.000881789	0.000586449
NM_009744	688	144	124	134	231	631	431		35	205	120	135	448	291.5		0.0194175	0.0175513	0.0184844	0.0383593	0.0595564	0.0489579		7.32786e-05	0.00026713	0.000170204	0.000347284	0.000646272	0.000496778			0.0184844	0.0489579		0.000170204	0.000496778
NM_008630	42	350	845	597.5	409	757	583		323	581	452	328	255	291.5		0.0471953	0.119604	0.0833995	0.0679176	0.0714488	0.0696832		0.000676257	0.000757085	0.000716671	0.000843771	0.000367855	0.000605813			0.0833995	0.0696832		0.000716671	0.000605813
NM_008520	1234	111	155	133	113	221	167		183	500	341.5	211	373	292		0.0149676	0.0219391	0.0184534	0.0187645	0.0208589	0.0198117		0.000383143	0.000651536	0.000517339	0.000542792	0.000538079	0.000540435			0.0184534	0.0198117		0.000517339	0.000540435
NM_007478	162	319	355	337	247	527	387		153	587	370	236	350	293		0.0430151	0.0502477	0.0466314	0.0410163	0.0497404	0.0453784		0.000320332	0.000764904	0.000542618	0.000607104	0.0005049	0.000556002			0.0466314	0.0453784		0.000542618	0.000556002
NM_023166	157	69	140	104.5	53	134	93.5		288	466	377	236	350	293		0.00930421	0.019816	0.0145601	0.00880106	0.0126475	0.0107243		0.000602978	0.000607232	0.000605105	0.000607104	0.0005049	0.000556002			0.0145601	0.0107243		0.000605105	0.000556002
NM_173755	1269	100	123	111.5	111	110	110.5		274	609	441.5	313	274	293.5		0.0134844	0.0174098	0.0154471	0.0184324	0.0103823	0.0144073		0.000573667	0.000793571	0.000683619	0.000805184	0.000395264	0.000600224			0.0154471	0.0144073		0.000683619	0.000600224
NM_145554	289	181	238	209.5	154	191	172.5		154	641	397.5	162	426	294		0.0244067	0.0336872	0.0290469	0.0255729	0.0180274	0.0218001		0.000322426	0.000835269	0.000578848	0.000416741	0.000614535	0.000515638			0.0290469	0.0218001		0.000578848	0.000515638
NM_001111021	446	128	190	159	55	248	151.5		121	779	450	140	449	294.5		0.01726	0.0268931	0.0220766	0.00913318	0.0234073	0.0162702		0.000253335	0.00101509	0.000634214	0.000360146	0.000647714	0.00050393			0.0220766	0.0162702		0.000634214	0.00050393
NM_007898	211	175	287	231	142	254	198		318	641	479.5	306	285	295.5		0.0235976	0.0406228	0.0321102	0.0235802	0.0239736	0.0237769		0.000665789	0.000835269	0.000750529	0.000787177	0.000411133	0.000599155			0.0321102	0.0237769		0.000750529	0.000599155
NM_010220	437	132	107	119.5	131	255	193		148	345	246.5	119	474	296.5		0.0177994	0.0151451	0.0164722	0.0217536	0.024068	0.0229108		0.000309864	0.00044956	0.000379712	0.000306124	0.000683778	0.000494951			0.0164722	0.0229108		0.000379712	0.000494951
NM_145609	326	152	119	135.5	186	237	211.5		252	260	256	312	282	297		0.0204962	0.0168436	0.0186699	0.0308867	0.022369	0.0266279		0.000527606	0.000338799	0.000433203	0.000802612	0.000406805	0.000604708			0.0186699	0.0266279		0.000433203	0.000604708
NM_029872	286	215	233	224	331	350	340.5		195	555	375	295	300	297.5		0.0289914	0.0329795	0.0309854	0.0549651	0.0330345	0.0439998		0.000408267	0.000723205	0.000565736	0.00075888	0.000432771	0.000595825			0.0309854	0.0439998		0.000565736	0.000595825
NM_010545	196	210	363	286.5	136	476	306		285	1018	651.5	220	375	297.5		0.0283172	0.05138	0.0398486	0.0225839	0.0449269	0.0337554		0.000596697	0.00132653	0.000961613	0.000565944	0.000540964	0.000553454			0.0398486	0.0337554		0.000961613	0.000553454
NM_025523	57	52	149	100.5	47	314	180.5		242	363	302.5	336	260	298		0.00701187	0.0210899	0.0140509	0.00780472	0.0296366	0.0187207		0.000506669	0.000473015	0.000489842	0.000864351	0.000375068	0.00061971			0.0140509	0.0187207		0.000489842	0.00061971
NM_001122766	300	111	190	150.5	142	237	189.5		296	488	392	336	260	298		0.0149676	0.0268931	0.0209304	0.0235802	0.022369	0.0229746		0.000619728	0.000635899	0.000627814	0.000864351	0.000375068	0.00061971			0.0209304	0.0229746		0.000627814	0.00061971
NM_010358	199	212	325	268.5	178	443	310.5		123	604	363.5	147	450	298.5		0.0285868	0.0460014	0.0372941	0.0295583	0.0418122	0.0356852		0.000257522	0.000787056	0.000522289	0.000378154	0.000649157	0.000513655			0.0372941	0.0356852		0.000522289	0.000513655
NM_001252451	211	144	98	121	125	162	143.5		353	393	373	312	286	299		0.0194175	0.0138712	0.0166443	0.0207572	0.0152902	0.0180237		0.000739067	0.000512107	0.000625587	0.000802612	0.000412575	0.000607593			0.0166443	0.0180237		0.000625587	0.000607593
NM_010913	299	396	315	355.5	426	651	538.5		141	608	374.5	182	416	299		0.0533981	0.044586	0.048992	0.0707406	0.0614441	0.0660923		0.000295208	0.000792268	0.000543738	0.00046819	0.000600109	0.00053415			0.048992	0.0660923		0.000543738	0.00053415
NM_001253847	472	143	137	140	93	266	179.5		44	568	306	39	561	300		0.0192826	0.0193914	0.019337	0.0154434	0.0251062	0.0202748		9.21217e-05	0.000740145	0.000416133	0.000100326	0.000809282	0.000454804			0.019337	0.0202748		0.000416133	0.000454804
NM_001164107	403	144	184	164	176	125	150.5		365	628	496.5	338	262	300		0.0194175	0.0260439	0.0227307	0.0292262	0.011798	0.0205121		0.000764191	0.00081833	0.00079126	0.000869496	0.000377953	0.000623725			0.0227307	0.0205121		0.00079126	0.000623725
NM_001164108	403	144	184	164	176	125	150.5		365	628	496.5	338	262	300		0.0194175	0.0260439	0.0227307	0.0292262	0.011798	0.0205121		0.000764191	0.00081833	0.00079126	0.000869496	0.000377953	0.000623725			0.0227307	0.0205121		0.00079126	0.000623725
NM_024442	505	101	100	100.5	86	94	90		295	396	345.5	362	239	300.5		0.0136192	0.0141543	0.0138867	0.014281	0.00887211	0.0115765		0.000617634	0.000516017	0.000566825	0.000931235	0.000344774	0.000638005			0.0138867	0.0115765		0.000566825	0.000638005
NM_010128	141	666	1244	955	536	1314	925		236	741	488.5	201	400	300.5		0.0898058	0.176079	0.132943	0.089007	0.124021	0.106514		0.000494107	0.000965577	0.000729842	0.000517067	0.000577028	0.000547048			0.132943	0.106514		0.000729842	0.000547048
NM_026159	590	87	123	105	115	187	151		237	561	399	297	305	301		0.0117314	0.0174098	0.0145706	0.0190966	0.0176498	0.0183732		0.000496201	0.000731024	0.000613612	0.000764024	0.000439984	0.000602004			0.0145706	0.0183732		0.000613612	0.000602004
NM_133828	308	141	108	124.5	120	290	205		137	512	324.5	164	439	301.5		0.0190129	0.0152866	0.0171498	0.0199269	0.0273714	0.0236492		0.000286834	0.000667173	0.000477003	0.000421886	0.000633288	0.000527587			0.0171498	0.0236492		0.000477003	0.000527587
NM_023127	39	78	123	100.5	71	154	112.5		345	350	347.5	335	268	301.5		0.0105178	0.0174098	0.0139638	0.0117901	0.0145352	0.0131626		0.000722318	0.000456075	0.000589197	0.000861778	0.000386609	0.000624194			0.0139638	0.0131626		0.000589197	0.000624194
NM_023211	39	343	514	428.5	240	823	531.5		312	418	365	279	324	301.5		0.0462513	0.072753	0.0595022	0.0398539	0.0776782	0.058766		0.000653227	0.000544684	0.000598955	0.00071772	0.000467393	0.000592556			0.0595022	0.058766		0.000598955	0.000592556
NM_001110832	328	402	327	364.5	428	671	549.5		141	611	376	183	420	301.5		0.0542071	0.0462845	0.0502458	0.0710727	0.0633318	0.0672022		0.000295208	0.000796177	0.000545693	0.000470763	0.00060588	0.000538321			0.0502458	0.0672022		0.000545693	0.000538321
NM_025348	65	86	283	184.5	94	269	181.5		534	244	389	508	96	302		0.0115965	0.0400566	0.0258266	0.0156094	0.0253893	0.0204994		0.00111802	0.00031795	0.000717986	0.00130682	0.000138487	0.000722652			0.0258266	0.0204994		0.000717986	0.000722652
NM_001110152	115	205	136	170.5	236	295	265.5		207	230	218.5	369	236	302.5		0.0276429	0.0192498	0.0234464	0.0391896	0.0278433	0.0335165		0.000433391	0.000299707	0.000366549	0.000949243	0.000340447	0.000644845			0.0234464	0.0335165		0.000366549	0.000644845
NM_026560	270	163	210	186.5	241	412	326.5		248	259	253.5	411	194	302.5		0.0219795	0.029724	0.0258517	0.0400199	0.0388863	0.0394531		0.000519231	0.000337496	0.000428364	0.00105729	0.000279859	0.000668573			0.0258517	0.0394531		0.000428364	0.000668573
NM_007477	162	178	223	200.5	147	246	196.5		582	344	463	439	168	303.5		0.0240022	0.031564	0.0277831	0.0244105	0.0232185	0.0238145		0.00121852	0.000448257	0.000833388	0.00112932	0.000242352	0.000685834			0.0277831	0.0238145		0.000833388	0.000685834
NM_011031	518	170	148	159	157	79	118		307	318	312.5	432	176	304		0.0229234	0.0209483	0.0219359	0.0260711	0.00745635	0.0167637		0.000642758	0.000414377	0.000528568	0.00111131	0.000253892	0.0006826			0.0219359	0.0167637		0.000528568	0.0006826
NM_023215	205	121	134	127.5	121	254	187.5		334	450	392	365	243	304		0.0163161	0.0189667	0.0176414	0.020093	0.0239736	0.0220333		0.000699288	0.000586383	0.000642835	0.000938953	0.000350545	0.000644749			0.0176414	0.0220333		0.000642835	0.000644749
NM_018864	258	226	222	224	178	212	195		263	562	412.5	289	319	304		0.0304746	0.0314225	0.0309486	0.0295583	0.0200094	0.0247839		0.000550637	0.000732327	0.000641482	0.000743445	0.00046018	0.000601812			0.0309486	0.0247839		0.000641482	0.000601812
NM_001177869	1735	101	172	136.5	103	188	145.5		209	1055	632	174	435	304.5		0.0136192	0.0243454	0.0189823	0.017104	0.0177442	0.0174241		0.000437578	0.00137474	0.00090616	0.00044761	0.000627518	0.000537564			0.0189823	0.0174241		0.00090616	0.000537564
NM_001042591	395	193	114	153.5	30	51	40.5		633	1330	981.5	203	407	305		0.0260248	0.0161359	0.0210803	0.00498173	0.00481359	0.00489766		0.0013253	0.00173309	0.00152919	0.000522212	0.000587126	0.000554669			0.0210803	0.00489766		0.00152919	0.000554669
NM_026519	164	234	239	236.5	205	233	219		194	517	355.5	246	365	305.5		0.0315534	0.0338287	0.0326911	0.0340418	0.0219915	0.0280167		0.000406173	0.000673688	0.000539931	0.000632828	0.000526538	0.000579683			0.0326911	0.0280167		0.000539931	0.000579683
NM_001001493	87	112	238	175	100	274	187		202	601	401.5	178	434	306		0.0151025	0.0336872	0.0243948	0.0166058	0.0258613	0.0212335		0.000422922	0.000783147	0.000603034	0.0004579	0.000626076	0.000541988			0.0243948	0.0212335		0.000603034	0.000541988
NM_001033389	556	171	185	178	204	345	274.5		169	469	319	254	362	308		0.0230583	0.0261854	0.0246218	0.0338758	0.0325625	0.0332192		0.000353831	0.000611141	0.000482486	0.000653408	0.000522211	0.000587809			0.0246218	0.0332192		0.000482486	0.000587809
NM_020001	190	158	99	128.5	165	71	118		642	342	492	481	135	308		0.0213053	0.0140127	0.017659	0.0273995	0.00670127	0.0170504		0.00134414	0.000445651	0.000894895	0.00123736	0.000194747	0.000716053			0.017659	0.0170504		0.000894895	0.000716053
NM_153592	321	269	237	253	271	281	276		268	613	440.5	219	400	309.5		0.0362729	0.0335456	0.0349093	0.0450017	0.0265219	0.0357618		0.000561105	0.000798783	0.000679944	0.000563372	0.000577028	0.0005702			0.0349093	0.0357618		0.000679944	0.0005702
NM_145371	286	103	165	134	113	118	115.5		416	681	548.5	391	228	309.5		0.0138889	0.0233546	0.0186217	0.0187645	0.0111373	0.0149509		0.000870969	0.000887392	0.000879181	0.00100584	0.000328906	0.000667372			0.0186217	0.0149509		0.000879181	0.000667372
NM_011942	212	111	221	166	131	187	159		210	1073	641.5	163	456	309.5		0.0149676	0.031281	0.0231243	0.0217536	0.0176498	0.0197017		0.000439672	0.0013982	0.000918934	0.000419313	0.000657812	0.000538563			0.0231243	0.0197017		0.000918934	0.000538563
NM_011793	70	171	172	171.5	171	136	153.5		145	469	307	246	375	310.5		0.0230583	0.0243454	0.0237018	0.0283959	0.0128362	0.0206161		0.000303583	0.000611141	0.000457362	0.000632828	0.000540964	0.000586896			0.0237018	0.0206161		0.000457362	0.000586896
NM_001038231	70	171	172	171.5	171	136	153.5		145	469	307	246	375	310.5		0.0230583	0.0243454	0.0237018	0.0283959	0.0128362	0.0206161		0.000303583	0.000611141	0.000457362	0.000632828	0.000540964	0.000586896			0.0237018	0.0206161		0.000457362	0.000586896
NM_001122765	333	114	213	163.5	149	259	204		296	527	411.5	345	276	310.5		0.0153722	0.0301486	0.0227604	0.0247426	0.0244455	0.0245941		0.000619728	0.000686719	0.000653224	0.000887503	0.000398149	0.000642826			0.0227604	0.0245941		0.000653224	0.000642826
NM_001039392	25	576	627	601.5	548	1172	860		382	131	256.5	418	204	311		0.0776699	0.0887473	0.0832086	0.0909997	0.110618	0.100809		0.000799784	0.000170702	0.000485243	0.00107529	0.000294284	0.000684789			0.0832086	0.100809		0.000485243	0.000684789
NM_001190327	25	576	627	601.5	548	1172	860		382	131	256.5	418	204	311		0.0776699	0.0887473	0.0832086	0.0909997	0.110618	0.100809		0.000799784	0.000170702	0.000485243	0.00107529	0.000294284	0.000684789			0.0832086	0.100809		0.000485243	0.000684789
NM_025284	25	576	627	601.5	548	1172	860		382	131	256.5	418	204	311		0.0776699	0.0887473	0.0832086	0.0909997	0.110618	0.100809		0.000799784	0.000170702	0.000485243	0.00107529	0.000294284	0.000684789			0.0832086	0.100809		0.000485243	0.000684789
NM_026829	184	129	130	129.5	165	294	229.5		294	270	282	325	297	311		0.0173948	0.0184006	0.0178977	0.0273995	0.0277489	0.0275742		0.000615541	0.00035183	0.000483685	0.000836054	0.000428443	0.000632249			0.0178977	0.0275742		0.000483685	0.000632249
NM_010828	250	417	481	449	216	1392	804		81	574	327.5	76	546	311		0.0562298	0.0680821	0.0621559	0.0358685	0.131383	0.0836256		0.000169588	0.000747964	0.000458776	0.000195508	0.000787644	0.000491576			0.0621559	0.0836256		0.000458776	0.000491576
NM_001004140	645	115	118	116.5	134	173	153.5		307	537	422	366	256	311		0.015507	0.0167021	0.0161045	0.0222517	0.0163285	0.0192901		0.000642758	0.00069975	0.000671254	0.000941525	0.000369298	0.000655412			0.0161045	0.0192901		0.000671254	0.000655412
NM_010548	159	3710	2526	3118	169	123	146		11370	8725	10047.5	350	272	311		0.50027	0.357537	0.428903	0.0280638	0.0116092	0.0198365		0.0238051	0.0113693	0.0175872	0.000900366	0.000392379	0.000646372			0.428903	0.0198365		0.0175872	0.000646372
NM_030112	696	161	120	140.5	170	229	199.5		130	560	345	72	551	311.5		0.0217098	0.0169851	0.0193475	0.0282298	0.021614	0.0249219		0.000272178	0.000729721	0.000500949	0.000185218	0.000794856	0.000490037			0.0193475	0.0249219		0.000500949	0.000490037
NM_019803	146	179	218	198.5	124	302	213		271	556	413.5	223	400	311.5		0.024137	0.0308563	0.0274967	0.0205912	0.028504	0.0245476		0.000567386	0.000724508	0.000645947	0.000573661	0.000577028	0.000575345			0.0274967	0.0245476		0.000645947	0.000575345
NM_194067	196	106	416	261	113	282	197.5		230	805	517.5	355	268	311.5		0.0142934	0.0588818	0.0365876	0.0187645	0.0266163	0.0226904		0.000481545	0.00104897	0.000765259	0.000913228	0.000386609	0.000649918			0.0365876	0.0226904		0.000765259	0.000649918
NM_001204906	615	103	126	114.5	128	71	99.5		307	785	546	297	326	311.5		0.0138889	0.0178344	0.0158616	0.0212554	0.00670127	0.0139783		0.000642758	0.00102291	0.000832835	0.000764024	0.000470278	0.000617151			0.0158616	0.0139783		0.000832835	0.000617151
NM_001204907	612	103	126	114.5	128	71	99.5		307	786	546.5	297	326	311.5		0.0138889	0.0178344	0.0158616	0.0212554	0.00670127	0.0139783		0.000642758	0.00102421	0.000833487	0.000764024	0.000470278	0.000617151			0.0158616	0.0139783		0.000833487	0.000617151
NM_028758	584	91	128	109.5	103	172	137.5		352	590	471	343	281	312		0.0122708	0.0181175	0.0151941	0.017104	0.0162341	0.016669		0.000736974	0.000768813	0.000752893	0.000882358	0.000405362	0.00064386			0.0151941	0.016669		0.000752893	0.00064386
NM_007646	285	90	112	101	206	83	144.5		181	484	332.5	396	229	312.5		0.0121359	0.0158528	0.0139944	0.0342079	0.00783388	0.0210209		0.000378955	0.000630687	0.000504821	0.0010187	0.000330349	0.000674524			0.0139944	0.0210209		0.000504821	0.000674524
NM_020256	652	134	111	122.5	163	139	151		114	590	352	150	475	312.5		0.018069	0.0157113	0.0168901	0.0270674	0.0131194	0.0200934		0.000238679	0.000768813	0.000503746	0.000385871	0.000685221	0.000535546			0.0168901	0.0200934		0.000503746	0.000535546
NM_001079513	652	134	111	122.5	163	139	151		114	590	352	150	475	312.5		0.018069	0.0157113	0.0168901	0.0270674	0.0131194	0.0200934		0.000238679	0.000768813	0.000503746	0.000385871	0.000685221	0.000535546			0.0168901	0.0200934		0.000503746	0.000535546
NM_001168591	413	103	141	122	120	103	111.5		332	645	488.5	353	272	312.5		0.0138889	0.0199575	0.0169232	0.0199269	0.00972157	0.0148243		0.0006951	0.000840482	0.000767791	0.000908083	0.000392379	0.000650231			0.0169232	0.0148243		0.000767791	0.000650231
NM_175557	565	248	235	241.5	163	376	269.5		280	773	526.5	263	362	312.5		0.0334412	0.0332626	0.0333519	0.0270674	0.0354884	0.0312779		0.000586229	0.00100728	0.000796752	0.00067656	0.000522211	0.000599385			0.0333519	0.0312779		0.000796752	0.000599385
NM_172635	751	175	137	156	124	175	149.5		250	900	575	143	482	312.5		0.0235976	0.0193914	0.0214945	0.0205912	0.0165172	0.0185542		0.000523419	0.00117277	0.000848092	0.000367864	0.000695319	0.000531591			0.0214945	0.0185542		0.000848092	0.000531591
NM_001136076	516	167	150	158.5	162	83	122.5		315	324	319.5	454	172	313		0.0225189	0.0212314	0.0218752	0.0269014	0.00783388	0.0173676		0.000659508	0.000422195	0.000540852	0.0011679	0.000248122	0.000708012			0.0218752	0.0173676		0.000540852	0.000708012
NM_001083110	559	75	126	100.5	93	187	140		325	432	378.5	315	311	313		0.0101133	0.0178344	0.0139738	0.0154434	0.0176498	0.0165466		0.000680444	0.000562927	0.000621686	0.000810329	0.000448639	0.000629484			0.0139738	0.0165466		0.000621686	0.000629484
NM_013469	484	379	597	488	430	798	614		198	753	475.5	212	416	314		0.0511057	0.0845011	0.0678034	0.0714048	0.0753185	0.0733617		0.000414548	0.000981214	0.000697881	0.000545364	0.000600109	0.000572737			0.0678034	0.0733617		0.000697881	0.000572737
NM_009366	124	200	275	237.5	36	148	92		1478	1119	1298.5	267	362	314.5		0.0269687	0.0389243	0.0329465	0.00597808	0.0139689	0.00997347		0.00309445	0.00145814	0.0022763	0.00068685	0.000522211	0.00060453			0.0329465	0.00997347		0.0022763	0.00060453
NM_001252083	535	244	226	235	171	366	268.5		279	776	527.5	267	363	315		0.0329018	0.0319887	0.0324453	0.0283959	0.0345446	0.0314702		0.000584135	0.00101118	0.00079766	0.00068685	0.000523653	0.000605252			0.0324453	0.0314702		0.00079766	0.000605252
NM_001253731	615	78	185	131.5	126	371	248.5		77	473	275	65	566	315.5		0.0105178	0.0261854	0.0183516	0.0209233	0.0350165	0.0279699		0.000161213	0.000616353	0.000388783	0.000167211	0.000816495	0.000491853			0.0183516	0.0279699		0.000388783	0.000491853
NM_011309	75	136	123	129.5	89	196	142.5		533	169	351	535	96	315.5		0.0183387	0.0174098	0.0178742	0.0147791	0.0184993	0.0166392		0.00111593	0.000220219	0.000668074	0.00137627	0.000138487	0.00075738			0.0178742	0.0166392		0.000668074	0.00075738
NM_022321	312	225	152	188.5	211	192	201.5		452	501	476.5	360	271	315.5		0.0303398	0.0215145	0.0259272	0.0350382	0.0181218	0.02658		0.000946341	0.000652839	0.00079959	0.00092609	0.000390937	0.000658513			0.0259272	0.02658		0.00079959	0.000658513
NM_145426	330	265	289	277	274	292	283		223	616	419.5	293	339	316		0.0357335	0.0409059	0.0383197	0.0454998	0.0275602	0.03653		0.00046689	0.000802693	0.000634791	0.000753735	0.000489031	0.000621383			0.0383197	0.03653		0.000634791	0.000621383
NM_180599	330	265	289	277	274	292	283		223	616	419.5	293	339	316		0.0357335	0.0409059	0.0383197	0.0454998	0.0275602	0.03653		0.00046689	0.000802693	0.000634791	0.000753735	0.000489031	0.000621383			0.0383197	0.03653		0.000634791	0.000621383
NM_139229	621	126	202	164	153	199	176		175	677	426	252	382	317		0.0169903	0.0285916	0.022791	0.0254068	0.0187824	0.0220946		0.000366393	0.00088218	0.000624287	0.000648263	0.000551062	0.000599663			0.022791	0.0220946		0.000624287	0.000599663
NM_133753	442	409	876	642.5	73	113	93		1783	6839	4311	243	392	317.5		0.055151	0.123992	0.0895713	0.0121222	0.0106654	0.0113938		0.00373302	0.00891171	0.00632237	0.000625111	0.000565488	0.000595299			0.0895713	0.0113938		0.00632237	0.000595299
NM_130862	503	58	143	100.5	75	232	153.5		247	577	412	187	449	318		0.00782093	0.0202406	0.0140308	0.0124543	0.0218971	0.0171757		0.000517138	0.000751873	0.000634505	0.000481052	0.000647714	0.000564383			0.0140308	0.0171757		0.000634505	0.000564383
NM_133763	309	121	142	131.5	119	191	155		246	404	325	283	354	318.5		0.0163161	0.0200991	0.0182076	0.0197609	0.0180274	0.0188941		0.000515044	0.000526441	0.000520743	0.00072801	0.00051067	0.00061934			0.0182076	0.0188941		0.000520743	0.00061934
NM_026040	422	132	98	115	145	141	143		295	385	340	330	307	318.5		0.0177994	0.0138712	0.0158353	0.0240784	0.0133082	0.0186933		0.000617634	0.000501683	0.000559659	0.000848916	0.000442869	0.000645893			0.0158353	0.0186933		0.000559659	0.000645893
NM_008695	1384	189	182	185.5	185	210	197.5		237	640	438.5	289	349	319		0.0254854	0.0257608	0.0256231	0.0307207	0.0198207	0.0252707		0.000496201	0.000833966	0.000665084	0.000743445	0.000503457	0.000623451			0.0256231	0.0252707		0.000665084	0.000623451
NM_144545	242	503	380	441.5	517	542	529.5		130	503	316.5	210	429	319.5		0.0678263	0.0537863	0.0608063	0.0858519	0.0511562	0.068504		0.000272178	0.000655445	0.000463812	0.000540219	0.000618863	0.000579541			0.0608063	0.068504		0.000463812	0.000579541
NM_001256055	242	503	380	441.5	517	542	529.5		130	503	316.5	210	429	319.5		0.0678263	0.0537863	0.0608063	0.0858519	0.0511562	0.068504		0.000272178	0.000655445	0.000463812	0.000540219	0.000618863	0.000579541			0.0608063	0.068504		0.000463812	0.000579541
NM_025301	157	121	196	158.5	122	213	167.5		307	411	359	402	238	320		0.0163161	0.0277424	0.0220292	0.0202591	0.0201038	0.0201814		0.000642758	0.000535563	0.000589161	0.00103413	0.000343332	0.000688733			0.0220292	0.0201814		0.000589161	0.000688733
NM_130889	253	513	454	483.5	644	789	716.5		92	372	232	178	464	321		0.0691748	0.0642604	0.0667176	0.106941	0.0744691	0.0907052		0.000192618	0.000484743	0.000338681	0.0004579	0.000669353	0.000563626			0.0667176	0.0907052		0.000338681	0.000563626
NM_025595	109	91	117	104	104	178	141		514	281	397.5	512	130	321		0.0122708	0.0165605	0.0144156	0.01727	0.0168004	0.0170352		0.00107615	0.000366163	0.000721156	0.00131711	0.000187534	0.00075232			0.0144156	0.0170352		0.000721156	0.00075232
NM_016666	311	243	253	248	328	361	344.5		232	318	275	349	297	323		0.032767	0.0358103	0.0342887	0.054467	0.0340727	0.0442698		0.000485733	0.000414377	0.000450055	0.000897793	0.000428443	0.000663118			0.0342887	0.0442698		0.000450055	0.000663118
NM_001159589	679	156	94	125	112	147	129.5		242	996	619	125	521	323		0.0210356	0.013305	0.0171703	0.0185985	0.0138745	0.0162365		0.000506669	0.00129786	0.000902265	0.000321559	0.000751579	0.000536569			0.0171703	0.0162365		0.000902265	0.000536569
NM_008212	295	80	181	130.5	83	132	107.5		271	620	445.5	300	347	323.5		0.0107875	0.0256192	0.0182034	0.0137828	0.0124587	0.0131208		0.000567386	0.000807905	0.000687645	0.000771742	0.000500572	0.000636157			0.0182034	0.0131208		0.000687645	0.000636157
NM_009085	327	146	171	158.5	111	180	145.5		515	447	481	404	243	323.5		0.0196872	0.0242038	0.0219455	0.0184324	0.0169891	0.0177108		0.00107824	0.000582473	0.000830358	0.00103928	0.000350545	0.000694912			0.0219455	0.0177108		0.000830358	0.000694912
NM_172132	1067	105	144	124.5	147	108	127.5		217	749	483	362	285	323.5		0.0141586	0.0203822	0.0172704	0.0244105	0.0101935	0.017302		0.000454328	0.000976001	0.000715164	0.000931235	0.000411133	0.000671184			0.0172704	0.017302		0.000715164	0.000671184
NM_026362	128	83	176	129.5	84	186	135		290	437	363.5	278	370	324		0.011192	0.0249115	0.0180518	0.0139489	0.0175555	0.0157522		0.000607166	0.000569443	0.000588304	0.000715147	0.000533751	0.000624449			0.0180518	0.0157522		0.000588304	0.000624449
NM_001164077	233	423	345	384	213	389	301		433	918	675.5	196	453	324.5		0.0570388	0.0488323	0.0529356	0.0353703	0.0367154	0.0360429		0.000906561	0.00119622	0.00105139	0.000504205	0.000653484	0.000578845			0.0529356	0.0360429		0.00105139	0.000578845
NM_001164076	233	423	345	384	213	389	301		433	918	675.5	196	453	324.5		0.0570388	0.0488323	0.0529356	0.0353703	0.0367154	0.0360429		0.000906561	0.00119622	0.00105139	0.000504205	0.000653484	0.000578845			0.0529356	0.0360429		0.00105139	0.000578845
NM_001164074	233	423	345	384	213	389	301		433	918	675.5	196	453	324.5		0.0570388	0.0488323	0.0529356	0.0353703	0.0367154	0.0360429		0.000906561	0.00119622	0.00105139	0.000504205	0.000653484	0.000578845			0.0529356	0.0360429		0.00105139	0.000578845
NM_017381	311	117	118	117.5	136	141	138.5		238	410	324	349	301	325		0.0157767	0.0167021	0.0162394	0.0225839	0.0133082	0.017946		0.000498295	0.00053426	0.000516277	0.000897793	0.000434214	0.000666003			0.0162394	0.017946		0.000516277	0.000666003
NM_008442	697	163	134	148.5	147	202	174.5		117	649	383	97	554	325.5		0.0219795	0.0189667	0.0204731	0.0244105	0.0190656	0.021738		0.00024496	0.000845694	0.000545327	0.00024953	0.000799184	0.000524357			0.0204731	0.021738		0.000545327	0.000524357
NM_001164791	435	177	102	139.5	86	165	125.5		285	517	401	223	428	325.5		0.0238673	0.0144374	0.0191523	0.014281	0.0155734	0.0149272		0.000596697	0.000673688	0.000635193	0.000573661	0.00061742	0.000595541			0.0191523	0.0149272		0.000635193	0.000595541
NM_029640	941	114	118	116	105	157	131		341	700	520.5	347	304	325.5		0.0153722	0.0167021	0.0160371	0.0174361	0.0148183	0.0161272		0.000713943	0.000912151	0.000813047	0.000892648	0.000438541	0.000665595			0.0160371	0.0161272		0.000813047	0.000665595
NM_138585	919	215	357	286	261	580	420.5		92	733	412.5	153	500	326.5		0.0289914	0.0505308	0.0397611	0.0433411	0.0547428	0.0490419		0.000192618	0.000955152	0.000573885	0.000393588	0.000721285	0.000557437			0.0397611	0.0490419		0.000573885	0.000557437
NM_030087	449	67	317	192	105	439	272		409	265	337	458	196	327		0.00903452	0.0448691	0.0269518	0.0174361	0.0414346	0.0294354		0.000856313	0.000345314	0.000600814	0.00117819	0.000282744	0.000730468			0.0269518	0.0294354		0.000600814	0.000730468
NM_030715	675	113	121	117	117	103	110		362	630	496	383	274	328.5		0.0152373	0.0171267	0.016182	0.0194288	0.00972157	0.0145752		0.00075791	0.000820936	0.000789423	0.000985257	0.000395264	0.000690261			0.016182	0.0145752		0.000789423	0.000690261
NM_001136075	634	122	173	147.5	129	326	227.5		140	571	355.5	182	476	329		0.0164509	0.0244869	0.0204689	0.0214215	0.0307692	0.0260953		0.000293115	0.000744054	0.000518584	0.00046819	0.000686664	0.000577427			0.0204689	0.0260953		0.000518584	0.000577427
NM_030004	300	132	198	165	145	206	175.5		263	574	418.5	314	344	329		0.0177994	0.0280255	0.0229124	0.0240784	0.0194431	0.0217608		0.000550637	0.000747964	0.0006493	0.000807757	0.000496244	0.000652			0.0229124	0.0217608		0.0006493	0.000652
NM_001039368	80	85	141	113	105	236	170.5		381	380	380.5	360	299	329.5		0.0114617	0.0199575	0.0157096	0.0174361	0.0222747	0.0198554		0.00079769	0.000495168	0.000646429	0.00092609	0.000431329	0.000678709			0.0157096	0.0198554		0.000646429	0.000678709
NM_001128601	184	130	120	125	158	315	236.5		186	241	213.5	283	377	330		0.0175297	0.0169851	0.0172574	0.0262371	0.029731	0.0279841		0.000389424	0.00031404	0.000351732	0.00072801	0.000543849	0.000635929			0.0172574	0.0279841		0.000351732	0.000635929
NM_016849	400	77	136	106.5	125	160	142.5		379	635	507	345	315	330		0.010383	0.0192498	0.0148164	0.0207572	0.0151015	0.0179293		0.000793503	0.000827451	0.000810477	0.000887503	0.00045441	0.000670956			0.0148164	0.0179293		0.000810477	0.000670956
NM_029934	454	190	214	202	195	289	242		291	522	406.5	317	344	330.5		0.0256203	0.0302902	0.0279552	0.0323813	0.027277	0.0298291		0.000609259	0.000680204	0.000644732	0.000815474	0.000496244	0.000655859			0.0279552	0.0298291		0.000644732	0.000655859
NM_001037755	516	62	152	107	79	242	160.5		262	580	421	201	460	330.5		0.0083603	0.0215145	0.0149374	0.0131186	0.022841	0.0179798		0.000548543	0.000755782	0.000652162	0.000517067	0.000663582	0.000590325			0.0149374	0.0179798		0.000652162	0.000590325
NM_172398	297	133	264	198.5	115	358	236.5		453	477	465	317	345	331		0.0179342	0.0373673	0.0276507	0.0190966	0.0337895	0.0264431		0.000948435	0.000621566	0.000785	0.000815474	0.000497687	0.00065658			0.0276507	0.0264431		0.000785	0.00065658
NM_001206385	484	72	192	132	88	226	157		274	488	381	296	367	331.5		0.00970874	0.0271762	0.0184425	0.0146131	0.0213308	0.017972		0.000573667	0.000635899	0.000604783	0.000761452	0.000529423	0.000645438			0.0184425	0.017972		0.000604783	0.000645438
NM_144888	484	72	192	132	88	226	157		274	488	381	296	367	331.5		0.00970874	0.0271762	0.0184425	0.0146131	0.0213308	0.017972		0.000573667	0.000635899	0.000604783	0.000761452	0.000529423	0.000645438			0.0184425	0.017972		0.000604783	0.000645438
NM_013581	961	82	172	127	107	163	135		299	940	619.5	277	386	331.5		0.0110572	0.0243454	0.0177013	0.0177682	0.0153846	0.0165764		0.000626009	0.00122489	0.000925449	0.000712575	0.000556832	0.000634704			0.0177013	0.0165764		0.000925449	0.000634704
NM_028727	652	146	167	156.5	127	117	122		405	894	649.5	355	308	331.5		0.0196872	0.0236377	0.0216624	0.0210893	0.0110429	0.0160661		0.000847938	0.00116495	0.00100644	0.000913228	0.000444312	0.00067877			0.0216624	0.0160661		0.00100644	0.00067877
NM_027481	624	135	165	150	176	280	228		332	243	287.5	433	231	332		0.0182039	0.0233546	0.0207792	0.0292262	0.0264276	0.0278269		0.0006951	0.000316647	0.000505873	0.00111388	0.000333234	0.000723557			0.0207792	0.0278269		0.000505873	0.000723557
NM_175563	349	77	139	108	133	167	150		94	587	340.5	217	447	332		0.010383	0.0196745	0.0150287	0.0220857	0.0157622	0.0189239		0.000196805	0.000764904	0.000480855	0.000558227	0.000644829	0.000601528			0.0150287	0.0189239		0.000480855	0.000601528
NM_010949	585	116	172	144	127	328	227.5		140	572	356	185	479	332		0.0156419	0.0243454	0.0199936	0.0210893	0.030958	0.0260237		0.000293115	0.000745357	0.000519236	0.000475908	0.000690991	0.000583449			0.0199936	0.0260237		0.000519236	0.000583449
NM_133761	583	189	222	205.5	188	464	326		169	615	392	197	468	332.5		0.0254854	0.0314225	0.028454	0.0312189	0.0437942	0.0375066		0.000353831	0.00080139	0.00057761	0.000506777	0.000675123	0.00059095			0.028454	0.0375066		0.00057761	0.00059095
NM_027318	134	35	173	104	30	214	122		401	433	417	433	232	332.5		0.00471953	0.0244869	0.0146032	0.00498173	0.0201982	0.01259		0.000839564	0.00056423	0.000701897	0.00111388	0.000334676	0.000724279			0.0146032	0.01259		0.000701897	0.000724279
NM_001162500	365	228	154	191	219	201	210		458	546	502	374	291	332.5		0.0307443	0.0217976	0.026271	0.0363667	0.0189712	0.0276689		0.000958903	0.000711478	0.00083519	0.000962105	0.000419788	0.000690946			0.026271	0.0276689		0.00083519	0.000690946
NM_019812	718	163	105	134	113	150	131.5		273	1017	645	126	540	333		0.0219795	0.014862	0.0184207	0.0187645	0.0141576	0.0164611		0.000571573	0.00132522	0.000948399	0.000324132	0.000778988	0.00055156			0.0184207	0.0164611		0.000948399	0.00055156
NM_009185	1243	159	115	137	81	37	59		663	1794	1228.5	239	427	333		0.0214401	0.0162774	0.0188588	0.0134507	0.00349221	0.00847145		0.00138811	0.00233771	0.00186291	0.000614821	0.000615978	0.000615399			0.0188588	0.00847145		0.00186291	0.000615399
NM_009801	241	118	94	106	54	65	59.5		742	629	685.5	353	315	334		0.0159115	0.013305	0.0146083	0.00896712	0.00613497	0.00755104		0.00155351	0.000819633	0.00118657	0.000908083	0.00045441	0.000681246			0.0146083	0.00755104		0.00118657	0.000681246
NM_001110162	963	94	122	108	105	127	116		247	621	434	333	336	334.5		0.0126753	0.0172682	0.0149718	0.0174361	0.0119868	0.0147114		0.000517138	0.000809208	0.000663173	0.000856634	0.000484704	0.000670669			0.0149718	0.0147114		0.000663173	0.000670669
NM_175384	963	94	122	108	105	127	116		247	621	434	333	336	334.5		0.0126753	0.0172682	0.0149718	0.0174361	0.0119868	0.0147114		0.000517138	0.000809208	0.000663173	0.000856634	0.000484704	0.000670669			0.0149718	0.0147114		0.000663173	0.000670669
NM_145529	698	194	187	190.5	197	185	191		211	867	539	253	416	334.5		0.0261597	0.0264685	0.0263141	0.0327134	0.0174611	0.0250872		0.000441765	0.00112976	0.000785765	0.000650836	0.000600109	0.000625473			0.0263141	0.0250872		0.000785765	0.000625473
NM_011420	269	135	171	153	123	362	242.5		185	401	293	240	430	335		0.0182039	0.0242038	0.0212039	0.0204251	0.0341671	0.0272961		0.00038733	0.000522532	0.000454931	0.000617394	0.000620305	0.000618849			0.0212039	0.0272961		0.000454931	0.000618849
NM_008564	885	130	136	133	156	169	162.5		375	622	498.5	272	398	335		0.0175297	0.0192498	0.0183897	0.025905	0.0159509	0.020928		0.000785128	0.000810511	0.00079782	0.000699713	0.000574143	0.000636928			0.0183897	0.020928		0.00079782	0.000636928
NM_018825	602	116	125	120.5	86	72	79		410	1189	799.5	440	230	335		0.0156419	0.0176929	0.0166674	0.014281	0.00679566	0.0105383		0.000858407	0.00154935	0.00120388	0.00113189	0.000331791	0.00073184			0.0166674	0.0105383		0.00120388	0.00073184
NM_019489	282	106	147	126.5	82	185	133.5		234	312	273	381	290	335.5		0.0142934	0.0208068	0.0175501	0.0136167	0.0174611	0.0155389		0.00048992	0.000406559	0.000448239	0.000980112	0.000418345	0.000699229			0.0175501	0.0155389		0.000448239	0.000699229
NM_018859	282	101	153	127	69	190	129.5		291	617	454	231	440	335.5		0.0136192	0.0216561	0.0176376	0.011458	0.017933	0.0146955		0.000609259	0.000803996	0.000706628	0.000594241	0.000634731	0.000614486			0.0176376	0.0146955		0.000706628	0.000614486
NM_023042	629	107	131	119	128	74	101		319	805	562	335	338	336.5		0.0144283	0.0185421	0.0164852	0.0212554	0.00698443	0.0141199		0.000667882	0.00104897	0.000858428	0.000861778	0.000487589	0.000674684			0.0164852	0.0141199		0.000858428	0.000674684
NM_011404	493	163	112	137.5	169	123	146		352	743	547.5	334	340	337		0.0219795	0.0158528	0.0189161	0.0280638	0.0116092	0.0198365		0.000736974	0.000968183	0.000852578	0.000859206	0.000490474	0.00067484			0.0189161	0.0198365		0.000852578	0.00067484
NM_171826	234	168	109	138.5	125	171	148		412	443	427.5	321	354	337.5		0.0226537	0.0154282	0.0190409	0.0207572	0.0161397	0.0184485		0.000862594	0.000577261	0.000719928	0.000825764	0.00051067	0.000668217			0.0190409	0.0184485		0.000719928	0.000668217
NM_181315	298	67	134	100.5	91	145	118		263	483	373	297	379	338		0.00903452	0.0189667	0.0140006	0.0151113	0.0136857	0.0143985		0.000550637	0.000629384	0.00059001	0.000764024	0.000546734	0.000655379			0.0140006	0.0143985		0.00059001	0.000655379
NM_025403	45	76	208	142	87	328	207.5		277	847	562	203	474	338.5		0.0102481	0.0294409	0.0198445	0.014447	0.030958	0.0227025		0.000579948	0.0011037	0.000841825	0.000522212	0.000683778	0.000602995			0.0198445	0.0227025		0.000841825	0.000602995
NM_023794	491	129	219	174	99	199	149		227	1329	778	224	454	339		0.0173948	0.0309979	0.0241963	0.0164397	0.0187824	0.0176111		0.000475264	0.00173178	0.00110352	0.000576234	0.000654927	0.00061558			0.0241963	0.0176111		0.00110352	0.00061558
NM_019955	467	166	221	193.5	197	142	169.5		464	680	572	392	287	339.5		0.022384	0.031281	0.0268325	0.0327134	0.0134025	0.023058		0.000971465	0.000886089	0.000928777	0.00100841	0.000414018	0.000711214			0.0268325	0.023058		0.000928777	0.000711214
NM_001252471	228	163	185	174	107	87	97		431	821	626	398	281	339.5		0.0219795	0.0261854	0.0240825	0.0177682	0.00821142	0.0129898		0.000902374	0.00106982	0.000986098	0.00102384	0.000405362	0.000714603			0.0240825	0.0129898		0.000986098	0.000714603
NM_015816	119	77	145	111	70	209	139.5		469	172	320.5	555	126	340.5		0.010383	0.0205237	0.0154533	0.011624	0.0197263	0.0156752		0.000981934	0.000224128	0.000603031	0.00142772	0.000181764	0.000804743			0.0154533	0.0156752		0.000603031	0.000804743
NM_019467	128	215	253	234	174	447	310.5		275	324	299.5	369	314	341.5		0.0289914	0.0358103	0.0324009	0.0288941	0.0421897	0.0355419		0.000575761	0.000422195	0.000498978	0.000949243	0.000452967	0.000701105			0.0324009	0.0355419		0.000498978	0.000701105
NM_134255	280	228	360	294	172	295	233.5		401	578	489.5	367	318	342.5		0.0307443	0.0509554	0.0408499	0.0285619	0.0278433	0.0282026		0.000839564	0.000753176	0.00079637	0.000944098	0.000458737	0.000701418			0.0408499	0.0282026		0.00079637	0.000701418
NM_007396	494	139	94	116.5	85	94	89.5		303	808	555.5	195	490	342.5		0.0187433	0.013305	0.0160241	0.0141149	0.00887211	0.0114935		0.000634384	0.00105288	0.000843633	0.000501632	0.00070686	0.000604246			0.0160241	0.0114935		0.000843633	0.000604246
NM_019816	507	77	133	105	161	174	167.5		271	345	308	445	241	343		0.010383	0.0188252	0.0146041	0.0267353	0.0164228	0.0215791		0.000567386	0.00044956	0.000508473	0.00114475	0.00034766	0.000746205			0.0146041	0.0215791		0.000508473	0.000746205
NM_001252587	477	110	134	122	100	157	128.5		180	838	509	244	442	343		0.0148328	0.0189667	0.0168998	0.0166058	0.0148183	0.015712		0.000376862	0.00109197	0.000734418	0.000627683	0.000637616	0.00063265			0.0168998	0.015712		0.000734418	0.00063265
NM_001190800	448	131	203	167	155	185	170		257	566	411.5	323	364	343.5		0.0176645	0.0287332	0.0231989	0.025739	0.0174611	0.0216		0.000538075	0.000737539	0.000637807	0.000830909	0.000525096	0.000678002			0.0231989	0.0216		0.000637807	0.000678002
NM_010191	397	129	120	124.5	94	80	87		559	684	621.5	396	291	343.5		0.0173948	0.0169851	0.01719	0.0156094	0.00755073	0.0115801		0.00117036	0.000891302	0.00103083	0.0010187	0.000419788	0.000719244			0.01719	0.0115801		0.00103083	0.000719244
NM_201226	562	76	136	106	97	158	127.5		224	605	414.5	391	297	344		0.0102481	0.0192498	0.014749	0.0161076	0.0149127	0.0155102		0.000468983	0.000788359	0.000628671	0.00100584	0.000428443	0.00071714			0.014749	0.0155102		0.000628671	0.00071714
NM_001080941	466	113	157	135	59	133	96		302	625	463.5	227	461	344		0.0152373	0.0222222	0.0187298	0.00979741	0.0125531	0.0111753		0.00063229	0.00081442	0.000723355	0.000583951	0.000665025	0.000624488			0.0187298	0.0111753		0.000723355	0.000624488
NM_021288	288	150	162	156	146	166	156		323	335	329	465	224	344.5		0.0202265	0.0229299	0.0215782	0.0242444	0.0156678	0.0199561		0.000676257	0.000436529	0.000556393	0.0011962	0.000323136	0.000759668			0.0215782	0.0199561		0.000556393	0.000759668
NM_026042	180	152	258	205	92	343	217.5		241	468	354.5	324	366	345		0.0204962	0.036518	0.0285071	0.0152773	0.0323738	0.0238255		0.000504576	0.000609838	0.000557207	0.000833481	0.000527981	0.000680731			0.0285071	0.0238255		0.000557207	0.000680731
NM_009952	322	141	107	124	118	287	202.5		152	567	359.5	165	525	345		0.0190129	0.0151451	0.017079	0.0195948	0.0270882	0.0233415		0.000318239	0.000738842	0.00052854	0.000424458	0.00075735	0.000590904			0.017079	0.0233415		0.00052854	0.000590904
NM_001098271	225	172	232	202	237	212	224.5		256	543	399.5	383	307	345		0.0231931	0.0328379	0.0280155	0.0393557	0.0200094	0.0296826		0.000535981	0.000707568	0.000621775	0.000985257	0.000442869	0.000714063			0.0280155	0.0296826		0.000621775	0.000714063
NM_025326	225	172	232	202	237	212	224.5		256	543	399.5	383	307	345		0.0231931	0.0328379	0.0280155	0.0393557	0.0200094	0.0296826		0.000535981	0.000707568	0.000621775	0.000985257	0.000442869	0.000714063			0.0280155	0.0296826		0.000621775	0.000714063
NM_172142	308	167	65	116	57	64	60.5		765	1113	939	323	368	345.5		0.0225189	0.00920028	0.0158596	0.00946529	0.00604059	0.00775294		0.00160166	0.00145032	0.00152599	0.000830909	0.000530866	0.000680887			0.0158596	0.00775294		0.00152599	0.000680887
NM_177688	110	1465	3307	2386	1472	3951	2711.5		373	201	287	647	45	346		0.197546	0.468082	0.332814	0.244437	0.372912	0.308674		0.000780941	0.000261918	0.000521429	0.00166439	6.49157e-05	0.000864653			0.332814	0.308674		0.000521429	0.000864653
NM_025878	235	142	242	192	136	349	242.5		282	557	419.5	336	356	346		0.0191478	0.0342534	0.0267006	0.0225839	0.0329401	0.027762		0.000590416	0.000725811	0.000658114	0.000864351	0.000513555	0.000688953			0.0267006	0.027762		0.000658114	0.000688953
NM_011936	483	109	116	112.5	97	247	172		196	456	326	247	446	346.5		0.014698	0.016419	0.0155585	0.0161076	0.0233129	0.0197102		0.00041036	0.000594201	0.000502281	0.000635401	0.000643386	0.000639394			0.0155585	0.0197102		0.000502281	0.000639394
NM_172766	1277	74	147	110.5	85	171	128		214	590	402	266	427	346.5		0.00997843	0.0208068	0.0153926	0.0141149	0.0161397	0.0151273		0.000448046	0.000768813	0.00060843	0.000684278	0.000615978	0.000650128			0.0153926	0.0151273		0.00060843	0.000650128
NM_007548	804	521	515	518	191	324	257.5		577	2244	1410.5	185	508	346.5		0.0702535	0.0728946	0.071574	0.031717	0.0305805	0.0311488		0.00120805	0.00292409	0.00206607	0.000475908	0.000732826	0.000604367			0.071574	0.0311488		0.00206607	0.000604367
NM_054057	255	117	175	146	129	186	157.5		380	578	479	326	370	348		0.0157767	0.02477	0.0202733	0.0214215	0.0175555	0.0194885		0.000795597	0.000753176	0.000774386	0.000838626	0.000533751	0.000686189			0.0202733	0.0194885		0.000774386	0.000686189
NM_007506	117	73	392	232.5	122	366	244		435	427	431	339	360	349.5		0.00984358	0.0554848	0.0326642	0.0202591	0.0345446	0.0274018		0.000910749	0.000556412	0.00073358	0.000872068	0.000519325	0.000695697			0.0326642	0.0274018		0.00073358	0.000695697
NM_001161419	117	73	392	232.5	122	366	244		435	427	431	339	360	349.5		0.00984358	0.0554848	0.0326642	0.0202591	0.0345446	0.0274018		0.000910749	0.000556412	0.00073358	0.000872068	0.000519325	0.000695697			0.0326642	0.0274018		0.00073358	0.000695697
NM_178377	183	188	198	193	208	319	263.5		198	693	445.5	156	544	350		0.0253506	0.0280255	0.026688	0.03454	0.0301085	0.0323243		0.000414548	0.000903029	0.000658788	0.000401306	0.000784758	0.000593032			0.026688	0.0323243		0.000658788	0.000593032
NM_001167964	603	102	105	103.5	97	78	87.5		287	1054	670.5	230	470	350		0.013754	0.014862	0.014308	0.0161076	0.00736196	0.0117348		0.000600885	0.00137344	0.000987162	0.000591669	0.000678008	0.000634838			0.014308	0.0117348		0.000987162	0.000634838
NM_133626	682	1305	967	1136	1552	1569	1560.5		175	503	339	278	423	350.5		0.175971	0.136872	0.156421	0.257722	0.148089	0.202905		0.000366393	0.000655445	0.000510919	0.000715147	0.000610207	0.000662677			0.156421	0.202905		0.000510919	0.000662677
NM_026407	467	365	269	317	63	56	59.5		1547	1667	1607	350	351	350.5		0.0492179	0.038075	0.0436465	0.0104616	0.00528551	0.00787358		0.00323892	0.00217222	0.00270557	0.000900366	0.000506342	0.000703354			0.0436465	0.00787358		0.00270557	0.000703354
NM_001205286	467	365	269	317	63	56	59.5		1547	1667	1607	350	351	350.5		0.0492179	0.038075	0.0436465	0.0104616	0.00528551	0.00787358		0.00323892	0.00217222	0.00270557	0.000900366	0.000506342	0.000703354			0.0436465	0.00787358		0.00270557	0.000703354
NM_030700	597	71	136	103.5	87	189	138		206	626	416	261	441	351		0.00957389	0.0192498	0.0144119	0.014447	0.0178386	0.0161428		0.000431297	0.000815723	0.00062351	0.000671415	0.000636174	0.000653795			0.0144119	0.0161428		0.00062351	0.000653795
NM_001199246	597	71	136	103.5	87	189	138		206	626	416	261	441	351		0.00957389	0.0192498	0.0144119	0.014447	0.0178386	0.0161428		0.000431297	0.000815723	0.00062351	0.000671415	0.000636174	0.000653795			0.0144119	0.0161428		0.00062351	0.000653795
NM_030210	653	108	142	125	102	138	120		353	759	556	375	328	351.5		0.0145631	0.0200991	0.0173311	0.0169379	0.013025	0.0149815		0.000739067	0.000989032	0.00086405	0.000964677	0.000473163	0.00071892			0.0173311	0.0149815		0.00086405	0.00071892
NM_016852	242	225	377	301	180	601	390.5		147	679	413	201	503	352		0.0303398	0.0533616	0.0418507	0.0298904	0.0567249	0.0433076		0.00030777	0.000884786	0.000596278	0.000517067	0.000725613	0.00062134			0.0418507	0.0433076		0.000596278	0.00062134
NM_133705	301	76	158	117	107	127	117		449	522	485.5	482	222	352		0.0102481	0.0223638	0.0163059	0.0177682	0.0119868	0.0148775		0.00094006	0.000680204	0.000810132	0.00123993	0.000320251	0.000780091			0.0163059	0.0148775		0.000810132	0.000780091
NM_025297	354	134	146	140	76	169	122.5		415	330	372.5	472	233	352.5		0.018069	0.0206653	0.0193671	0.0126204	0.0159509	0.0142857		0.000868875	0.000430014	0.000649445	0.00121421	0.000336119	0.000775163			0.0193671	0.0142857		0.000649445	0.000775163
NM_008670	1384	218	268	243	350	312	331		241	596	418.5	235	470	352.5		0.0293959	0.0379335	0.0336647	0.0581202	0.0294479	0.043784		0.000504576	0.000776631	0.000640603	0.000604531	0.000678008	0.00064127			0.0336647	0.043784		0.000640603	0.00064127
NM_026365	164	69	162	115.5	88	265	176.5		288	570	429	408	297	352.5		0.00930421	0.0229299	0.0161171	0.0146131	0.0250118	0.0198124		0.000602978	0.000742751	0.000672865	0.00104957	0.000428443	0.000739006			0.0161171	0.0198124		0.000672865	0.000739006
NM_001190853	195	122	148	135	117	192	154.5		293	430	361.5	346	363	354.5		0.0164509	0.0209483	0.0186996	0.0194288	0.0181218	0.0187753		0.000613447	0.000560321	0.000586884	0.000890076	0.000523653	0.000706864			0.0186996	0.0187753		0.000586884	0.000706864
NM_022554	220	141	159	150	136	216	176		294	430	362	347	363	355		0.0190129	0.0225053	0.0207591	0.0225839	0.020387	0.0214854		0.000615541	0.000560321	0.000587931	0.000892648	0.000523653	0.000708151			0.0207591	0.0214854		0.000587931	0.000708151
NM_001190857	215	141	159	150	136	216	176		294	430	362	347	363	355		0.0190129	0.0225053	0.0207591	0.0225839	0.020387	0.0214854		0.000615541	0.000560321	0.000587931	0.000892648	0.000523653	0.000708151			0.0207591	0.0214854		0.000587931	0.000708151
NM_212446	252	103	136	119.5	110	179	144.5		239	629	434	270	440	355		0.0138889	0.0192498	0.0165694	0.0182664	0.0168948	0.0175806		0.000500388	0.000819633	0.00066001	0.000694568	0.000634731	0.000664649			0.0165694	0.0175806		0.00066001	0.000664649
NM_001253905	2234	234	339	286.5	271	420	345.5		224	1134	679	210	500	355		0.0315534	0.047983	0.0397682	0.0450017	0.0396413	0.0423215		0.000468983	0.00147768	0.000973334	0.000540219	0.000721285	0.000630752			0.0397682	0.0423215		0.000973334	0.000630752
NM_001127233	362	315	539	427	418	739	578.5		97	804	450.5	253	458	355.5		0.0424757	0.0762916	0.0593837	0.0694122	0.0697499	0.069581		0.000203086	0.00104767	0.000625378	0.000650836	0.000660697	0.000655766			0.0593837	0.069581		0.000625378	0.000655766
NM_053197	302	127	195	161	92	124	108		352	1417	884.5	330	382	356		0.0171251	0.0276008	0.022363	0.0152773	0.0117036	0.0134905		0.000736974	0.00184645	0.00129171	0.000848916	0.000551062	0.000699989			0.022363	0.0134905		0.00129171	0.000699989
NM_183142	431	115	101	108	113	126	119.5		198	596	397	320	394	357		0.015507	0.0142958	0.0149014	0.0187645	0.0118924	0.0153285		0.000414548	0.000776631	0.000595589	0.000823191	0.000568373	0.000695782			0.0149014	0.0153285		0.000595589	0.000695782
NM_025605	142	93	183	138	41	223	132		420	377	398.5	324	392	358		0.0125405	0.0259023	0.0192214	0.00680837	0.0210477	0.013928		0.000879344	0.000491258	0.000685301	0.000833481	0.000565488	0.000699484			0.0192214	0.013928		0.000685301	0.000699484
NM_001159748	226	145	189	167	127	179	153		307	953	630	225	494	359.5		0.0195523	0.0267516	0.023152	0.0210893	0.0168948	0.0189921		0.000642758	0.00124183	0.000942293	0.000578806	0.00071263	0.000645718			0.023152	0.0189921		0.000942293	0.000645718
NM_001166623	372	114	142	128	116	206	161		238	434	336	411	309	360		0.0153722	0.0200991	0.0177356	0.0192627	0.0194431	0.0193529		0.000498295	0.000565533	0.000531914	0.00105729	0.000445754	0.00075152			0.0177356	0.0193529		0.000531914	0.00075152
NM_011252	372	114	142	128	116	206	161		238	434	336	411	309	360		0.0153722	0.0200991	0.0177356	0.0192627	0.0194431	0.0193529		0.000498295	0.000565533	0.000531914	0.00105729	0.000445754	0.00075152			0.0177356	0.0193529		0.000531914	0.00075152
NM_176968	448	94	112	103	93	120	106.5		219	623	421	315	407	361		0.0126753	0.0158528	0.014264	0.0154434	0.0113261	0.0133847		0.000458515	0.000811814	0.000635165	0.000810329	0.000587126	0.000698728			0.014264	0.0133847		0.000635165	0.000698728
NM_133209	205	470	266	368	579	175	377		674	313	493.5	574	149	361.5		0.0633765	0.0376504	0.0505134	0.0961475	0.0165172	0.0563323		0.00141114	0.000407862	0.000909499	0.0014766	0.000214943	0.000845771			0.0505134	0.0563323		0.000909499	0.000845771
NM_011986	710	102	138	120	109	102	105.5		348	1026	687	427	296	361.5		0.013754	0.0195329	0.0166435	0.0181003	0.00962718	0.0138637		0.000728599	0.00133695	0.00103278	0.00109845	0.000427001	0.000762723			0.0166435	0.0138637		0.00103278	0.000762723
NM_021519	129	275	387	331	335	597	466		372	310	341	505	221	363		0.037082	0.0547771	0.0459295	0.0556294	0.0563473	0.0559883		0.000778847	0.000403952	0.0005914	0.0012991	0.000318808	0.000808953			0.0459295	0.0559883		0.0005914	0.000808953
NM_026693	98	222	295	258.5	222	474	348		264	430	347	248	478	363		0.0299353	0.0417551	0.0358452	0.0368648	0.0447381	0.0408015		0.00055273	0.000560321	0.000556526	0.000637973	0.000689549	0.000663761			0.0358452	0.0408015		0.000556526	0.000663761
NM_001013365	244	414	327	370.5	162	243	202.5		1166	1210	1188	438	288	363		0.0558252	0.0462845	0.0510549	0.0269014	0.0229353	0.0249184		0.00244123	0.00157672	0.00200897	0.00112674	0.00041546	0.000771102			0.0510549	0.0249184		0.00200897	0.000771102
NM_026689	333	95	154	124.5	62	97	79.5		651	842	746.5	372	355	363.5		0.0128101	0.0217976	0.0173039	0.0102956	0.00915526	0.00972542		0.00136298	0.00109719	0.00123008	0.00095696	0.000512113	0.000734536			0.0173039	0.00972542		0.00123008	0.000734536
NM_030153	706	139	142	140.5	180	136	158		241	717	479	342	386	364		0.0187433	0.0200991	0.0194212	0.0298904	0.0128362	0.0213633		0.000504576	0.000934303	0.000719439	0.000879786	0.000556832	0.000718309			0.0194212	0.0213633		0.000719439	0.000718309
NM_010318	49	186	797	491.5	134	1421	777.5		286	686	486	164	564	364		0.0250809	0.11281	0.0689453	0.0222517	0.13412	0.0781858		0.000598791	0.000893908	0.000746349	0.000421886	0.00081361	0.000617748			0.0689453	0.0781858		0.000746349	0.000617748
NM_009086	1116	113	181	147	110	89	99.5		591	1583	1087	441	287	364		0.0152373	0.0256192	0.0204283	0.0182664	0.00840019	0.0133333		0.00123736	0.00206276	0.00165006	0.00113446	0.000414018	0.000774239			0.0204283	0.0133333		0.00165006	0.000774239
NM_001012273	102	108	173	140.5	143	239	191		319	375	347	425	304	364.5		0.0145631	0.0244869	0.019525	0.0237463	0.0225578	0.023152		0.000667882	0.000488652	0.000578267	0.0010933	0.000438541	0.000765921			0.019525	0.023152		0.000578267	0.000765921
NM_001253904	2313	252	360	306	286	440	363		231	1173	702	216	513	364.5		0.0339806	0.0509554	0.042468	0.0474925	0.041529	0.0445108		0.000483639	0.0015285	0.00100607	0.000555654	0.000740039	0.000647846			0.042468	0.0445108		0.00100607	0.000647846
NM_026819	294	96	170	133	102	181	141.5		355	684	519.5	394	336	365		0.012945	0.0240623	0.0185036	0.0169379	0.0170835	0.0170107		0.000743255	0.000891302	0.000817278	0.00101355	0.000484704	0.000749129			0.0185036	0.0170107		0.000817278	0.000749129
NM_001164255	262	217	164	190.5	166	210	188		552	350	451	441	290	365.5		0.0292611	0.023213	0.026237	0.0275656	0.0198207	0.0236931		0.00115571	0.000456075	0.000805892	0.00113446	0.000418345	0.000776403			0.026237	0.0236931		0.000805892	0.000776403
NM_001164248	265	217	164	190.5	166	211	188.5		553	356	454.5	441	290	365.5		0.0292611	0.023213	0.026237	0.0275656	0.0199151	0.0237403		0.0011578	0.000463894	0.000810848	0.00113446	0.000418345	0.000776403			0.026237	0.0237403		0.000810848	0.000776403
NM_153588	1061	174	166	170	117	246	181.5		152	1059	605.5	130	601	365.5		0.0234628	0.0234961	0.0234794	0.0194288	0.0232185	0.0213236		0.000318239	0.00137995	0.000849096	0.000334421	0.000866985	0.000600703			0.0234794	0.0213236		0.000849096	0.000600703
NM_028784	713	106	235	170.5	110	184	147		195	1064	629.5	293	440	366.5		0.0142934	0.0332626	0.023778	0.0182664	0.0173667	0.0178165		0.000408267	0.00138647	0.000897368	0.000753735	0.000634731	0.000694233			0.023778	0.0178165		0.000897368	0.000694233
NM_001166391	713	106	235	170.5	110	184	147		195	1064	629.5	293	440	366.5		0.0142934	0.0332626	0.023778	0.0182664	0.0173667	0.0178165		0.000408267	0.00138647	0.000897368	0.000753735	0.000634731	0.000694233			0.023778	0.0178165		0.000897368	0.000694233
NM_027238	598	105	112	108.5	94	117	105.5		322	892	607	229	505	367		0.0141586	0.0158528	0.0150057	0.0156094	0.0110429	0.0133262		0.000674163	0.00116234	0.000918252	0.000589096	0.000728498	0.000658797			0.0150057	0.0133262		0.000918252	0.000658797
NM_001159599	695	156	179	167.5	136	122	129		427	997	712	390	344	367		0.0210356	0.0253362	0.0231859	0.0225839	0.0115149	0.0170494		0.000893999	0.00129916	0.00109658	0.00100326	0.000496244	0.000749754			0.0231859	0.0170494		0.00109658	0.000749754
NM_020520	282	103	123	113	71	88	79.5		544	667	605.5	420	315	367.5		0.0138889	0.0174098	0.0156493	0.0117901	0.0083058	0.010048		0.00113896	0.000869149	0.00100405	0.00108044	0.00045441	0.000767424			0.0156493	0.010048		0.00100405	0.000767424
NM_025305	223	75	128	101.5	121	152	136.5		312	454	383	432	304	368		0.0101133	0.0181175	0.0141154	0.020093	0.0143464	0.0172197		0.000653227	0.000591595	0.000622411	0.00111131	0.000438541	0.000774925			0.0141154	0.0172197		0.000622411	0.000774925
NM_053161	129	68	137	102.5	84	225	154.5		453	339	396	466	270	368		0.00916936	0.0193914	0.0142804	0.0139489	0.0212364	0.0175926		0.000948435	0.000441742	0.000695088	0.00119877	0.000389494	0.000794133			0.0142804	0.0175926		0.000695088	0.000794133
NM_001171053	495	115	131	123	129	226	177.5		318	478	398	315	421	368		0.015507	0.0185421	0.0170246	0.0214215	0.0213308	0.0213761		0.000665789	0.000622869	0.000644329	0.000810329	0.000607322	0.000708826			0.0170246	0.0213761		0.000644329	0.000708826
NM_001081259	541	127	139	133	79	170	124.5		322	1019	670.5	233	503	368		0.0171251	0.0196745	0.0183998	0.0131186	0.0160453	0.0145819		0.000674163	0.00132783	0.001001	0.000599386	0.000725613	0.0006625			0.0183998	0.0145819		0.001001	0.0006625
NM_001177706	373	113	145	129	135	234	184.5		408	411	409.5	485	255	370		0.0152373	0.0205237	0.0178805	0.0224178	0.0220859	0.0222518		0.000854219	0.000535563	0.000694891	0.00124765	0.000367855	0.000807752			0.0178805	0.0222518		0.000694891	0.000807752
NM_001177709	373	113	145	129	135	234	184.5		408	411	409.5	485	255	370		0.0152373	0.0205237	0.0178805	0.0224178	0.0220859	0.0222518		0.000854219	0.000535563	0.000694891	0.00124765	0.000367855	0.000807752			0.0178805	0.0222518		0.000694891	0.000807752
NM_001164251	265	236	164	200	188	234	211		510	329	419.5	452	288	370		0.0318231	0.023213	0.0275181	0.0312189	0.0220859	0.0266524		0.00106777	0.000428711	0.000748243	0.00116276	0.00041546	0.000789109			0.0275181	0.0266524		0.000748243	0.000789109
NM_172735	462	117	133	125	86	197	141.5		233	557	395	289	452	370.5		0.0157767	0.0188252	0.0173009	0.014281	0.0185937	0.0164373		0.000487826	0.000725811	0.000606819	0.000743445	0.000652042	0.000697743			0.0173009	0.0164373		0.000606819	0.000697743
NM_001177710	342	89	127	108	136	220	178		437	410	423.5	444	297	370.5		0.0120011	0.0179759	0.0149885	0.0225839	0.0207645	0.0216742		0.000914936	0.00053426	0.000724598	0.00114218	0.000428443	0.000785311			0.0149885	0.0216742		0.000724598	0.000785311
NM_009229	501	136	88	112	144	56	100		331	682	506.5	489	252	370.5		0.0183387	0.0124558	0.0153972	0.0239123	0.00528551	0.0145989		0.000693006	0.000888695	0.000790851	0.00125794	0.000363528	0.000810734			0.0153972	0.0145989		0.000790851	0.000810734
NM_001033175	289	149	93	121	107	158	132.5		332	550	441	406	336	371		0.0200917	0.0131635	0.0166276	0.0177682	0.0149127	0.0163404		0.0006951	0.00071669	0.000705895	0.00104442	0.000484704	0.000764564			0.0166276	0.0163404		0.000705895	0.000764564
NM_001146176	132	102	119	110.5	118	520	319		192	513	352.5	172	571	371.5		0.013754	0.0168436	0.0152988	0.0195948	0.0490798	0.0343373		0.000401986	0.000668476	0.000535231	0.000442465	0.000823708	0.000633087			0.0152988	0.0343373		0.000535231	0.000633087
NM_016923	141	90	137	113.5	66	221	143.5		227	545	386	219	524	371.5		0.0121359	0.0193914	0.0157636	0.0109598	0.0208589	0.0159094		0.000475264	0.000710175	0.000592719	0.000563372	0.000755907	0.000659639			0.0157636	0.0159094		0.000592719	0.000659639
NM_024287	189	306	278	292	438	398	418		323	666	494.5	296	447	371.5		0.0412621	0.0393489	0.0403055	0.0727333	0.0375649	0.0551491		0.000676257	0.000867846	0.000772052	0.000761452	0.000644829	0.000703141			0.0403055	0.0551491		0.000772052	0.000703141
NM_029092	395	99	115	107	111	101	106		244	793	518.5	231	512	371.5		0.0133495	0.0162774	0.0148135	0.0184324	0.0095328	0.0139826		0.000510857	0.00103334	0.000772097	0.000594241	0.000738596	0.000666419			0.0148135	0.0139826		0.000772097	0.000666419
NM_026448	567	136	81	108.5	70	135	102.5		275	959	617	249	495	372		0.0183387	0.011465	0.0149018	0.011624	0.0127419	0.012183		0.000575761	0.00124965	0.000912704	0.000640546	0.000714072	0.000677309			0.0149018	0.012183		0.000912704	0.000677309
NM_011424	2449	256	360	308	288	458	373		237	1165	701	231	513	372		0.03452	0.0509554	0.0427377	0.0478246	0.0432279	0.0455263		0.000496201	0.00151808	0.00100714	0.000594241	0.000740039	0.00066714			0.0427377	0.0455263		0.00100714	0.00066714
NM_026467	65	153	396	274.5	151	629	390		195	57	126	128	619	373.5		0.0206311	0.056051	0.038341	0.0250747	0.0593676	0.0422212		0.000408267	7.42751e-05	0.000241271	0.000329277	0.000892951	0.000611114			0.038341	0.0422212		0.000241271	0.000611114
NM_001177707	375	113	145	129	136	236	186		408	412	410	491	257	374		0.0152373	0.0205237	0.0178805	0.0225839	0.0222747	0.0224293		0.000854219	0.000536866	0.000695543	0.00126308	0.000370741	0.000816912			0.0178805	0.0224293		0.000695543	0.000816912
NM_001177708	375	113	145	129	136	236	186		408	412	410	491	257	374		0.0152373	0.0205237	0.0178805	0.0225839	0.0222747	0.0224293		0.000854219	0.000536866	0.000695543	0.00126308	0.000370741	0.000816912			0.0178805	0.0224293		0.000695543	0.000816912
NM_001167768	253	72	170	121	66	144	105		160	886	523	169	579	374		0.00970874	0.0240623	0.0168855	0.0109598	0.0135913	0.0122756		0.000334988	0.00115452	0.000744755	0.000434748	0.000835248	0.000634998			0.0168855	0.0122756		0.000744755	0.000634998
NM_016753	203	190	215	202.5	212	379	295.5		116	623	369.5	183	566	374.5		0.0256203	0.0304317	0.028026	0.0352043	0.0357716	0.0354879		0.000242866	0.000811814	0.00052734	0.000470763	0.000816495	0.000643629			0.028026	0.0354879		0.00052734	0.000643629
NM_001167669	198	191	212	201.5	153	357	255		441	378	409.5	500	249	374.5		0.0257551	0.0300071	0.0278811	0.0254068	0.0336951	0.029551		0.000923311	0.000492561	0.000707936	0.00128624	0.0003592	0.000822718			0.0278811	0.029551		0.000707936	0.000822718
NM_001166477	77	258	480	369	169	748	458.5		410	481	445.5	327	422	374.5		0.0347896	0.0679406	0.0513651	0.0280638	0.0705993	0.0493316		0.000858407	0.000626778	0.000742592	0.000841199	0.000608765	0.000724982			0.0513651	0.0493316		0.000742592	0.000724982
NM_001166542	77	258	480	369	169	748	458.5		410	481	445.5	327	422	374.5		0.0347896	0.0679406	0.0513651	0.0280638	0.0705993	0.0493316		0.000858407	0.000626778	0.000742592	0.000841199	0.000608765	0.000724982			0.0513651	0.0493316		0.000742592	0.000724982
NM_001166541	77	258	480	369	169	748	458.5		410	481	445.5	327	422	374.5		0.0347896	0.0679406	0.0513651	0.0280638	0.0705993	0.0493316		0.000858407	0.000626778	0.000742592	0.000841199	0.000608765	0.000724982			0.0513651	0.0493316		0.000742592	0.000724982
NM_001166540	77	258	480	369	169	748	458.5		410	481	445.5	327	422	374.5		0.0347896	0.0679406	0.0513651	0.0280638	0.0705993	0.0493316		0.000858407	0.000626778	0.000742592	0.000841199	0.000608765	0.000724982			0.0513651	0.0493316		0.000742592	0.000724982
NM_001166537	77	258	480	369	169	748	458.5		410	481	445.5	327	422	374.5		0.0347896	0.0679406	0.0513651	0.0280638	0.0705993	0.0493316		0.000858407	0.000626778	0.000742592	0.000841199	0.000608765	0.000724982			0.0513651	0.0493316		0.000742592	0.000724982
NM_001166539	77	258	480	369	169	748	458.5		410	481	445.5	327	422	374.5		0.0347896	0.0679406	0.0513651	0.0280638	0.0705993	0.0493316		0.000858407	0.000626778	0.000742592	0.000841199	0.000608765	0.000724982			0.0513651	0.0493316		0.000742592	0.000724982
NM_001252450	257	169	113	141	130	186	158		420	496	458	369	380	374.5		0.0227886	0.0159943	0.0193915	0.0215875	0.0175555	0.0195715		0.000879344	0.000646324	0.000762834	0.000949243	0.000548177	0.00074871			0.0193915	0.0195715		0.000762834	0.00074871
NM_007750	50	80	303	191.5	98	459	278.5		343	731	537	319	430	374.5		0.0107875	0.0428875	0.0268375	0.0162737	0.0433223	0.029798		0.000718131	0.000952546	0.000835338	0.000820619	0.000620305	0.000720462			0.0268375	0.029798		0.000835338	0.000720462
NM_001145779	686	165	142	153.5	152	212	182		129	780	454.5	103	647	375		0.0222492	0.0200991	0.0211741	0.0252408	0.0200094	0.0226251		0.000270084	0.0010164	0.00064324	0.000264965	0.000933343	0.000599154			0.0211741	0.0226251		0.00064324	0.000599154
NM_133859	387	178	55	116.5	156	83	119.5		685	249	467	570	180	375		0.0240022	0.00778485	0.0158935	0.025905	0.00783388	0.0168694		0.00143417	0.000324465	0.000879316	0.00146631	0.000259663	0.000862986			0.0158935	0.0168694		0.000879316	0.000862986
NM_199035	507	230	345	287.5	242	503	372.5		238	844	541	170	581	375.5		0.031014	0.0488323	0.0399231	0.040186	0.0474752	0.0438306		0.000498295	0.00109979	0.000799044	0.00043732	0.000838133	0.000637727			0.0399231	0.0438306		0.000799044	0.000637727
NM_198169	511	262	200	231	88	214	151		497	609	553	211	540	375.5		0.035329	0.0283086	0.0318188	0.0146131	0.0201982	0.0174056		0.00104056	0.000793571	0.000917064	0.000542792	0.000778988	0.00066089			0.0318188	0.0174056		0.000917064	0.00066089
NM_173026	1031	258	195	226.5	207	192	199.5		334	1299	816.5	244	507	375.5		0.0347896	0.0276008	0.0311952	0.034374	0.0181218	0.0262479		0.000699288	0.00169269	0.00119599	0.000627683	0.000731383	0.000679533			0.0311952	0.0262479		0.00119599	0.000679533
NM_008176	77	2455	1525	1990	799	257	528		1620	1518	1569	604	147	375.5		0.331041	0.215853	0.273447	0.13268	0.0242567	0.0784684		0.00339175	0.00197806	0.00268491	0.00155377	0.000212058	0.000882916			0.273447	0.0784684		0.00268491	0.000882916
NM_019406	319	403	379	391	396	553	474.5		370	538	454	366	387	376.5		0.054342	0.0536447	0.0539933	0.0657589	0.0521944	0.0589767		0.00077466	0.000701053	0.000737856	0.000941525	0.000558275	0.0007499			0.0539933	0.0589767		0.000737856	0.0007499
NM_053158	317	105	105	105	126	236	181		161	502	331.5	208	546	377		0.0141586	0.014862	0.0145103	0.0209233	0.0222747	0.021599		0.000337082	0.000654142	0.000495612	0.000535074	0.000787644	0.000661359			0.0145103	0.021599		0.000495612	0.000661359
NM_138607	320	268	250	259	249	303	276		242	346	294	404	351	377.5		0.0361381	0.0353857	0.0357619	0.0413484	0.0285984	0.0349734		0.000506669	0.000450863	0.000478766	0.00103928	0.000506342	0.000772811			0.0357619	0.0349734		0.000478766	0.000772811
NM_012039	760	95	115	105	97	102	99.5		337	734	535.5	378	377	377.5		0.0128101	0.0162774	0.0145438	0.0161076	0.00962718	0.0128674		0.000705569	0.000956455	0.000831012	0.000972395	0.000543849	0.000758122			0.0145438	0.0128674		0.000831012	0.000758122
NM_008037	307	631	485	558	366	170	268		688	1063	875.5	557	198	377.5		0.0850863	0.0686483	0.0768673	0.0607772	0.0160453	0.0384112		0.00144045	0.00138517	0.00141281	0.00143287	0.000285629	0.000859248			0.0768673	0.0384112		0.00141281	0.000859248
NM_009287	666	137	71	104	154	164	159		294	669	481.5	380	376	378		0.0184736	0.0100495	0.0142616	0.0255729	0.015479	0.0205259		0.000615541	0.000871756	0.000743648	0.00097754	0.000542407	0.000759973			0.0142616	0.0205259		0.000743648	0.000759973
NM_153804	1322	187	145	166	143	111	127		580	1197	888.5	425	331	378		0.0252157	0.0205237	0.0228697	0.0237463	0.0104766	0.0171115		0.00121433	0.00155978	0.00138705	0.0010933	0.000477491	0.000785396			0.0228697	0.0171115		0.00138705	0.000785396
NM_175255	1071	206	257	231.5	192	282	237		84	1235	659.5	108	650	379		0.0277778	0.0363765	0.0320771	0.0318831	0.0266163	0.0292497		0.000175869	0.00160929	0.000892582	0.000277827	0.000937671	0.000607749			0.0320771	0.0292497		0.000892582	0.000607749
NM_026790	241	128	483	305.5	131	320	225.5		270	1105	687.5	421	338	379.5		0.01726	0.0683652	0.0428126	0.0217536	0.0302029	0.0259782		0.000565292	0.0014399	0.00100259	0.00108301	0.000487589	0.0007853			0.0428126	0.0259782		0.00100259	0.0007853
NM_026144	314	117	175	146	123	139	131		412	867	639.5	422	339	380.5		0.0157767	0.02477	0.0202733	0.0204251	0.0131194	0.0167723		0.000862594	0.00112976	0.000996179	0.00108558	0.000489031	0.000787308			0.0202733	0.0167723		0.000996179	0.000787308
NM_194341	1119	92	111	101.5	131	218	174.5		91	824	457.5	163	599	381		0.0124056	0.0157113	0.0140584	0.0217536	0.0205757	0.0211647		0.000190524	0.00107373	0.000632128	0.000419313	0.0008641	0.000641706			0.0140584	0.0211647		0.000632128	0.000641706
NM_029211	308	126	152	139	208	245	226.5		307	689	498	295	468	381.5		0.0169903	0.0215145	0.0192524	0.03454	0.0231241	0.0288321		0.000642758	0.000897817	0.000770288	0.00075888	0.000675123	0.000717001			0.0192524	0.0288321		0.000770288	0.000717001
NM_001017966	380	190	206	198	219	218	218.5		387	725	556	460	303	381.5		0.0256203	0.0291578	0.0273891	0.0363667	0.0205757	0.0284712		0.000810252	0.000944728	0.00087749	0.00118334	0.000437099	0.000810218			0.0273891	0.0284712		0.00087749	0.000810218
NM_010888	97	58	145	101.5	53	227	140		422	288	355	542	222	382		0.00782093	0.0205237	0.0141723	0.00880106	0.0214252	0.0151131		0.000883531	0.000375285	0.000629408	0.00139428	0.000320251	0.000857266			0.0141723	0.0151131		0.000629408	0.000857266
NM_144897	263	117	205	161	119	241	180		412	523	467.5	382	383	382.5		0.0157767	0.0290163	0.0223965	0.0197609	0.0227466	0.0212537		0.000862594	0.000681507	0.000772051	0.000982685	0.000552505	0.000767595			0.0223965	0.0212537		0.000772051	0.000767595
NM_008681	375	209	236	222.5	183	138	160.5		414	779	596.5	578	189	383.5		0.0281823	0.0334041	0.0307932	0.0303886	0.013025	0.0217068		0.000866782	0.00101509	0.000940938	0.00148689	0.000272646	0.000879768			0.0307932	0.0217068		0.000940938	0.000879768
NM_172501	328	337	257	297	248	278	263		437	903	670	390	378	384		0.0454423	0.0363765	0.0409094	0.0411823	0.0262388	0.0337106		0.000914936	0.00117667	0.00104581	0.00100326	0.000545292	0.000774278			0.0409094	0.0337106		0.00104581	0.000774278
NM_001013370	473	100	192	146	56	152	104		490	1787	1138.5	220	548	384		0.0134844	0.0271762	0.0203303	0.00929924	0.0143464	0.0118228		0.0010259	0.00232859	0.00167725	0.000565944	0.000790529	0.000678236			0.0203303	0.0118228		0.00167725	0.000678236
NM_001076789	172	179	80	129.5	118	95	106.5		249	499	374	331	438	384.5		0.024137	0.0113234	0.0177302	0.0195948	0.00896649	0.0142807		0.000521325	0.000650233	0.000585779	0.000851489	0.000631846	0.000741667			0.0177302	0.0142807		0.000585779	0.000741667
NM_001110216	172	179	80	129.5	118	95	106.5		249	499	374	331	438	384.5		0.024137	0.0113234	0.0177302	0.0195948	0.00896649	0.0142807		0.000521325	0.000650233	0.000585779	0.000851489	0.000631846	0.000741667			0.0177302	0.0142807		0.000585779	0.000741667
NM_007626	172	179	80	129.5	118	95	106.5		249	499	374	331	438	384.5		0.024137	0.0113234	0.0177302	0.0195948	0.00896649	0.0142807		0.000521325	0.000650233	0.000585779	0.000851489	0.000631846	0.000741667			0.0177302	0.0142807		0.000585779	0.000741667
NM_001110212	1266	283	280	281.5	367	372	369.5		263	721	492	248	522	385		0.0381607	0.039632	0.0388964	0.0609432	0.0351109	0.0480271		0.000550637	0.000939515	0.000745076	0.000637973	0.000753022	0.000695498			0.0388964	0.0480271		0.000745076	0.000695498
NM_178220	391	133	157	145	108	118	113		530	1010	770	456	314	385		0.0179342	0.0222222	0.0200782	0.0179342	0.0111373	0.0145358		0.00110965	0.0013161	0.00121288	0.00117305	0.000452967	0.000813007			0.0200782	0.0145358		0.00121288	0.000813007
NM_181854	783	108	208	158	134	240	187		204	788	496	265	506	385.5		0.0145631	0.0294409	0.022002	0.0222517	0.0226522	0.022452		0.00042711	0.00102682	0.000726965	0.000681705	0.000729941	0.000705823			0.022002	0.022452		0.000726965	0.000705823
NM_172150	407	110	125	117.5	81	132	106.5		334	666	500	288	483	385.5		0.0148328	0.0176929	0.0162628	0.0134507	0.0124587	0.0129547		0.000699288	0.000867846	0.000783567	0.000740872	0.000696762	0.000718817			0.0162628	0.0129547		0.000783567	0.000718817
NM_009471	462	93	110	101.5	167	134	150.5		536	480	508	498	273	385.5		0.0125405	0.0155697	0.0140551	0.0277317	0.0126475	0.0201896		0.00112221	0.000625475	0.000873842	0.00128109	0.000393822	0.000837457			0.0140551	0.0201896		0.000873842	0.000837457
NM_138745	916	168	210	189	164	183	173.5		416	886	651	410	362	386		0.0226537	0.029724	0.0261889	0.0272335	0.0172723	0.0222529		0.000870969	0.00115452	0.00101275	0.00105471	0.000522211	0.000788462			0.0261889	0.0222529		0.00101275	0.000788462
NM_026441	256	111	165	138	107	362	234.5		342	539	440.5	402	371	386.5		0.0149676	0.0233546	0.0191611	0.0177682	0.0341671	0.0259676		0.000716037	0.000702356	0.000709197	0.00103413	0.000535194	0.000784664			0.0191611	0.0259676		0.000709197	0.000784664
NM_181406	559	97	125	111	106	105	105.5		215	679	447	251	522	386.5		0.0130798	0.0176929	0.0153863	0.0176021	0.00991034	0.0137562		0.00045014	0.000884786	0.000667463	0.000645691	0.000753022	0.000699356			0.0153863	0.0137562		0.000667463	0.000699356
NM_206534	93	84	127	105.5	70	199	134.5		359	398	378.5	387	387	387		0.0113269	0.0179759	0.0146514	0.011624	0.0187824	0.0152032		0.000751629	0.000518623	0.000635126	0.000995547	0.000558275	0.000776911			0.0146514	0.0152032		0.000635126	0.000776911
NM_001171054	494	118	129	123.5	130	229	179.5		322	514	418	333	442	387.5		0.0159115	0.018259	0.0170853	0.0215875	0.021614	0.0216007		0.000674163	0.000669779	0.000671971	0.000856634	0.000637616	0.000747125			0.0170853	0.0216007		0.000671971	0.000747125
NM_001163689	467	145	201	173	118	192	155		327	689	508	319	458	388.5		0.0195523	0.0284501	0.0240012	0.0195948	0.0181218	0.0188583		0.000684632	0.000897817	0.000791224	0.000820619	0.000660697	0.000740658			0.0240012	0.0188583		0.000791224	0.000740658
NM_172401	307	115	217	166	116	174	145		162	942	552	179	599	389		0.015507	0.0307148	0.0231109	0.0192627	0.0164228	0.0178428		0.000339175	0.00122749	0.000783335	0.000460473	0.0008641	0.000662286			0.0231109	0.0178428		0.000783335	0.000662286
NM_001162908	532	100	190	145	56	146	101		521	1771	1146	228	550	389		0.0134844	0.0268931	0.0201887	0.00929924	0.0137801	0.0115397		0.0010908	0.00230774	0.00169927	0.000586524	0.000793414	0.000689969			0.0201887	0.0115397		0.00169927	0.000689969
NM_009372	253	438	372	405	226	416	321		556	1010	783	244	535	389.5		0.0590615	0.0526539	0.0558577	0.0375291	0.0392638	0.0383964		0.00116408	0.0013161	0.00124009	0.000627683	0.000771775	0.000699729			0.0558577	0.0383964		0.00124009	0.000699729
NM_133850	181	141	143	142	112	205	158.5		340	564	452	341	439	390		0.0190129	0.0202406	0.0196268	0.0185985	0.0193487	0.0189736		0.00071185	0.000734933	0.000723391	0.000877213	0.000633288	0.000755251			0.0196268	0.0189736		0.000723391	0.000755251
NM_177231	399	134	157	145.5	108	116	112		534	1000	767	464	316	390		0.018069	0.0222222	0.0201456	0.0179342	0.0109486	0.0144414		0.00111802	0.00130307	0.00121055	0.00119363	0.000455852	0.00082474			0.0201456	0.0144414		0.00121055	0.00082474
NM_008872	540	332	350	341	176	143	159.5		949	1313	1131	554	227	390.5		0.0447681	0.04954	0.047154	0.0292262	0.0134969	0.0213616		0.0019869	0.00171093	0.00184892	0.00142515	0.000327464	0.000876307			0.047154	0.0213616		0.00184892	0.000876307
NM_001243161	473	130	111	120.5	125	141	133		209	717	463	328	454	391		0.0175297	0.0157113	0.0166205	0.0207572	0.0133082	0.0170327		0.000437578	0.000934303	0.000685941	0.000843771	0.000654927	0.000749349			0.0166205	0.0170327		0.000685941	0.000749349
NM_001243053	334	145	216	180.5	141	128	134.5		399	650	524.5	509	273	391		0.0195523	0.0305732	0.0250628	0.0234141	0.0120812	0.0177477		0.000835376	0.000846997	0.000841187	0.00130939	0.000393822	0.000851605			0.0250628	0.0177477		0.000841187	0.000851605
NM_001243052	334	145	216	180.5	141	128	134.5		399	650	524.5	509	273	391		0.0195523	0.0305732	0.0250628	0.0234141	0.0120812	0.0177477		0.000835376	0.000846997	0.000841187	0.00130939	0.000393822	0.000851605			0.0250628	0.0177477		0.000841187	0.000851605
NM_146094	428	127	182	154.5	103	309	206		341	667	504	339	445	392		0.0171251	0.0257608	0.021443	0.017104	0.0291647	0.0231343		0.000713943	0.000869149	0.000791546	0.000872068	0.000641944	0.000757006			0.021443	0.0231343		0.000791546	0.000757006
NM_146112	1272	283	283	283	368	372	370		270	738	504	262	523	392.5		0.0381607	0.0400566	0.0391087	0.0611093	0.0351109	0.0481101		0.000565292	0.000961668	0.00076348	0.000673988	0.000754464	0.000714226			0.0391087	0.0481101		0.00076348	0.000714226
NM_053177	561	174	141	157.5	154	184	169		499	663	581	436	350	393		0.0234628	0.0199575	0.0217102	0.0255729	0.0173667	0.0214698		0.00104474	0.000863937	0.000954341	0.0011216	0.0005049	0.000813249			0.0217102	0.0214698		0.000954341	0.000813249
NM_181070	187	393	404	398.5	432	666	549		235	569	402	124	663	393.5		0.0529935	0.0571833	0.0550884	0.071737	0.0628598	0.0672984		0.000492014	0.000741448	0.000616731	0.000318987	0.000956424	0.000637705			0.0550884	0.0672984		0.000616731	0.000637705
NM_025922	179	115	166	140.5	115	228	171.5		311	674	492.5	345	442	393.5		0.015507	0.0234961	0.0195016	0.0190966	0.0215196	0.0203081		0.000651133	0.000878271	0.000764702	0.000887503	0.000637616	0.00076256			0.0195016	0.0203081		0.000764702	0.00076256
NM_001039710	223	144	247	195.5	118	240	179		353	839	596	288	500	394		0.0194175	0.0349611	0.0271893	0.0195948	0.0226522	0.0211235		0.000739067	0.00109328	0.000916173	0.000740872	0.000721285	0.000731079			0.0271893	0.0211235		0.000916173	0.000731079
NM_153126	1005	168	200	184	99	111	105		615	1211	913	395	394	394.5		0.0226537	0.0283086	0.0254811	0.0164397	0.0104766	0.0134582		0.00128761	0.00157802	0.00143282	0.00101613	0.000568373	0.00079225			0.0254811	0.0134582		0.00143282	0.00079225
NM_175317	1108	154	192	173	118	124	121		503	1257	880	350	440	395		0.0207659	0.0271762	0.0239711	0.0195948	0.0117036	0.0156492		0.00105312	0.00163796	0.00134554	0.000900366	0.000634731	0.000767548			0.0239711	0.0156492		0.00134554	0.000767548
NM_001159672	1108	154	192	173	118	124	121		503	1257	880	350	440	395		0.0207659	0.0271762	0.0239711	0.0195948	0.0117036	0.0156492		0.00105312	0.00163796	0.00134554	0.000900366	0.000634731	0.000767548			0.0239711	0.0156492		0.00134554	0.000767548
NM_024184	183	92	138	115	105	177	141		189	619	404	257	534	395.5		0.0124056	0.0195329	0.0159693	0.0174361	0.016706	0.017071		0.000395705	0.000806602	0.000601153	0.000661126	0.000770333	0.000715729			0.0159693	0.017071		0.000601153	0.000715729
NM_001168578	98	87	133	110	143	220	181.5		426	515	470.5	389	402	395.5		0.0117314	0.0188252	0.0152783	0.0237463	0.0207645	0.0222554		0.000891906	0.000671082	0.000781494	0.00100069	0.000579913	0.000790303			0.0152783	0.0222554		0.000781494	0.000790303
NM_025703	98	87	133	110	143	220	181.5		426	515	470.5	389	402	395.5		0.0117314	0.0188252	0.0152783	0.0237463	0.0207645	0.0222554		0.000891906	0.000671082	0.000781494	0.00100069	0.000579913	0.000790303			0.0152783	0.0222554		0.000781494	0.000790303
NM_023773	839	203	105	154	202	154	178		127	548	337.5	243	549	396		0.0273732	0.014862	0.0211176	0.0335437	0.0145352	0.0240394		0.000265897	0.000714084	0.00048999	0.000625111	0.000791971	0.000708541			0.0211176	0.0240394		0.00048999	0.000708541
NM_025996	290	234	249	241.5	244	295	269.5		307	600	453.5	405	389	397		0.0315534	0.0352442	0.0333988	0.0405181	0.0278433	0.0341807		0.000642758	0.000781844	0.000712301	0.00104185	0.00056116	0.000801506			0.0333988	0.0341807		0.000712301	0.000801506
NM_001167963	720	124	128	126	119	87	103		300	1212	756	264	530	397		0.0167206	0.0181175	0.017419	0.0197609	0.00821142	0.0139861		0.000628103	0.00157932	0.00110371	0.000679133	0.000764562	0.000721848			0.017419	0.0139861		0.00110371	0.000721848
NM_001114328	734	158	78	118	127	144	135.5		252	411	331.5	325	470	397.5		0.0213053	0.0110403	0.0161728	0.0210893	0.0135913	0.0173403		0.000527606	0.000535563	0.000531584	0.000836054	0.000678008	0.000757031			0.0161728	0.0173403		0.000531584	0.000757031
NM_001110311	151	159	203	181	136	348	242		317	415	366	451	345	398		0.0214401	0.0287332	0.0250867	0.0225839	0.0328457	0.0277148		0.000663695	0.000540775	0.000602235	0.00116019	0.000497687	0.000828936			0.0250867	0.0277148		0.000602235	0.000828936
NM_028811	528	97	179	138	132	180	156		391	684	537.5	441	355	398		0.0130798	0.0253362	0.019208	0.0219196	0.0169891	0.0194544		0.000818627	0.000891302	0.000854964	0.00113446	0.000512113	0.000823287			0.019208	0.0194544		0.000854964	0.000823287
NM_019869	650	105	257	181	150	316	233		315	643	479	465	332	398.5		0.0141586	0.0363765	0.0252675	0.0249087	0.0298254	0.027367		0.000659508	0.000837876	0.000748692	0.0011962	0.000478933	0.000837567			0.0252675	0.027367		0.000748692	0.000837567
NM_028264	238	133	152	142.5	85	230	157.5		263	726	494.5	205	592	398.5		0.0179342	0.0215145	0.0197244	0.0141149	0.0217084	0.0179116		0.000550637	0.000946031	0.000748334	0.000527357	0.000854002	0.000690679			0.0197244	0.0179116		0.000748334	0.000690679
NM_138596	116	127	175	151	128	323	225.5		322	424	373	425	373	399		0.0171251	0.02477	0.0209476	0.0212554	0.0304861	0.0258707		0.000674163	0.000552503	0.000613333	0.0010933	0.000538079	0.00081569			0.0209476	0.0258707		0.000613333	0.00081569
NM_007929	153	126	238	182	104	246	175		310	802	556	218	580	399		0.0169903	0.0336872	0.0253387	0.01727	0.0232185	0.0202443		0.000649039	0.00104506	0.000847052	0.000560799	0.000836691	0.000698745			0.0253387	0.0202443		0.000847052	0.000698745
NM_001110310	143	156	202	179	135	344	239.5		321	417	369	452	347	399.5		0.0210356	0.0285916	0.0248136	0.0224178	0.0324681	0.027443		0.00067207	0.000543381	0.000607725	0.00116276	0.000500572	0.000831665			0.0248136	0.027443		0.000607725	0.000831665
NM_001163684	257	103	120	111.5	126	169	147.5		405	506	455.5	488	311	399.5		0.0138889	0.0169851	0.015437	0.0209233	0.0159509	0.0184371		0.000847938	0.000659355	0.000753647	0.00125537	0.000448639	0.000852003			0.015437	0.0184371		0.000753647	0.000852003
NM_001081356	82	204	251	227.5	161	425	293		91	574	332.5	78	722	400		0.0275081	0.0355272	0.0315177	0.0267353	0.0401133	0.0334243		0.000190524	0.000747964	0.000469244	0.000200653	0.00104154	0.000621094			0.0315177	0.0334243		0.000469244	0.000621094
NM_001190989	319	165	135	150	94	201	147.5		342	793	567.5	365	435	400		0.0222492	0.0191083	0.0206787	0.0156094	0.0189712	0.0172903		0.000716037	0.00103334	0.000874687	0.000938953	0.000627518	0.000783235			0.0206787	0.0172903		0.000874687	0.000783235
NM_144541	364	228	242	235	240	267	253.5		251	654	452.5	352	449	400.5		0.0307443	0.0342534	0.0324988	0.0398539	0.0252006	0.0325272		0.000525512	0.000852209	0.000688861	0.00090551	0.000647714	0.000776612			0.0324988	0.0325272		0.000688861	0.000776612
NM_029561	319	165	135	150	94	201	147.5		346	793	569.5	365	436	400.5		0.0222492	0.0191083	0.0206787	0.0156094	0.0189712	0.0172903		0.000724412	0.00103334	0.000878874	0.000938953	0.000628961	0.000783957			0.0206787	0.0172903		0.000878874	0.000783957
NM_153414	668	80	195	137.5	128	402	265		116	606	361	95	707	401		0.0107875	0.0276008	0.0191942	0.0212554	0.0379424	0.0295989		0.000242866	0.000789662	0.000516264	0.000244385	0.0010199	0.000632141			0.0191942	0.0295989		0.000516264	0.000632141
NM_007836	146	677	464	570.5	168	69	118.5		1034	1275	1154.5	664	139	401.5		0.0912891	0.0656759	0.0784825	0.0278977	0.00651251	0.0172051		0.00216486	0.00166142	0.00191314	0.00170812	0.000200517	0.00095432			0.0784825	0.0172051		0.00191314	0.00095432
NM_008558	141	102	125	113.5	119	537	328		192	526	359	193	611	402		0.013754	0.0176929	0.0157234	0.0197609	0.0506843	0.0352226		0.000401986	0.000685416	0.000543701	0.000496487	0.000881411	0.000688949			0.0157234	0.0352226		0.000543701	0.000688949
NM_026149	563	131	137	134	113	147	130		438	746	592	345	459	402		0.0176645	0.0193914	0.0185279	0.0187645	0.0138745	0.0163195		0.00091703	0.000972092	0.000944561	0.000887503	0.00066214	0.000774822			0.0185279	0.0163195		0.000944561	0.000774822
NM_026872	1113	185	292	238.5	169	305	237		259	933	596	243	561	402		0.0249461	0.0413305	0.0331383	0.0280638	0.0287872	0.0284255		0.000542262	0.00121577	0.000879014	0.000625111	0.000809282	0.000717197			0.0331383	0.0284255		0.000879014	0.000717197
NM_178058	354	134	118	126	102	134	118		530	678	604	497	307	402		0.018069	0.0167021	0.0173855	0.0169379	0.0126475	0.0147927		0.00110965	0.000883483	0.000996566	0.00127852	0.000442869	0.000860694			0.0173855	0.0147927		0.000996566	0.000860694
NM_054082	572	134	144	139	131	256	193.5		356	563	459.5	341	464	402.5		0.018069	0.0203822	0.0192256	0.0217536	0.0241623	0.022958		0.000745348	0.00073363	0.000739489	0.000877213	0.000669353	0.000773283			0.0192256	0.022958		0.000739489	0.000773283
NM_012011	453	283	2	142.5	282	1	141.5		713	0	356.5	806	0	403		0.0381607	0.000283086	0.0192219	0.0468283	9.43841e-05	0.0234613		0.00149279	0	0.000746395	0.00207341	0	0.00103671			0.0192219	0.0234613		0.000746395	0.00103671
NM_026238	457	104	157	130.5	149	200	174.5		348	681	514.5	331	475	403		0.0140237	0.0222222	0.018123	0.0247426	0.0188768	0.0218097		0.000728599	0.000887392	0.000807996	0.000851489	0.000685221	0.000768355			0.018123	0.0218097		0.000807996	0.000768355
NM_001113554	562	130	139	134.5	117	150	133.5		440	729	584.5	352	454	403		0.0175297	0.0196745	0.0186021	0.0194288	0.0141576	0.0167932		0.000921217	0.00094994	0.000935578	0.00090551	0.000654927	0.000780219			0.0186021	0.0167932		0.000935578	0.000780219
NM_001164075	286	444	388	416	228	428	328		579	1034	806.5	249	557	403		0.0598706	0.0549186	0.0573946	0.0378612	0.0403964	0.0391288		0.00121224	0.00134738	0.00127981	0.000640546	0.000803512	0.000722029			0.0573946	0.0391288		0.00127981	0.000722029
NM_026095	107	246	501	373.5	303	701	502		307	239	273	554	253	403.5		0.0331715	0.070913	0.0520422	0.0503155	0.0661633	0.0582394		0.000642758	0.000311434	0.000477096	0.00142515	0.00036497	0.00089506			0.0520422	0.0582394		0.000477096	0.00089506
NM_026768	177	85	126	105.5	95	243	169		426	376	401	387	422	404.5		0.0114617	0.0178344	0.014648	0.0157755	0.0229353	0.0193554		0.000891906	0.000489955	0.00069093	0.000995547	0.000608765	0.000802156			0.014648	0.0193554		0.00069093	0.000802156
NM_001252549	168	181	209	195	260	228	244		510	722	616	441	368	404.5		0.0244067	0.0295824	0.0269946	0.043175	0.0215196	0.0323473		0.00106777	0.000940818	0.0010043	0.00113446	0.000530866	0.000832663			0.0269946	0.0323473		0.0010043	0.000832663
NM_001252548	168	181	209	195	260	228	244		510	722	616	441	368	404.5		0.0244067	0.0295824	0.0269946	0.043175	0.0215196	0.0323473		0.00106777	0.000940818	0.0010043	0.00113446	0.000530866	0.000832663			0.0269946	0.0323473		0.0010043	0.000832663
NM_144832	168	181	209	195	260	228	244		510	722	616	441	368	404.5		0.0244067	0.0295824	0.0269946	0.043175	0.0215196	0.0323473		0.00106777	0.000940818	0.0010043	0.00113446	0.000530866	0.000832663			0.0269946	0.0323473		0.0010043	0.000832663
NM_001033299	1022	150	155	152.5	179	198	188.5		241	796	518.5	342	468	405		0.0202265	0.0219391	0.0210828	0.0297243	0.0186881	0.0242062		0.000504576	0.00103725	0.000770911	0.000879786	0.000675123	0.000777454			0.0210828	0.0242062		0.000770911	0.000777454
NM_001159683	1022	150	155	152.5	179	198	188.5		241	796	518.5	342	468	405		0.0202265	0.0219391	0.0210828	0.0297243	0.0186881	0.0242062		0.000504576	0.00103725	0.000770911	0.000879786	0.000675123	0.000777454			0.0210828	0.0242062		0.000770911	0.000777454
NM_009128	339	60	718	389	54	408	231		61	2260	1160.5	45	766	405.5		0.00809061	0.101628	0.0548592	0.00896712	0.0385087	0.0237379		0.000127714	0.00294494	0.00153633	0.000115761	0.00110501	0.000610385			0.0548592	0.0237379		0.00153633	0.000610385
NM_001171052	567	140	144	142	145	257	201		347	558	452.5	348	465	406.5		0.0188781	0.0203822	0.0196301	0.0240784	0.0242567	0.0241676		0.000726505	0.000727114	0.00072681	0.000895221	0.000670795	0.000783008			0.0196301	0.0241676		0.00072681	0.000783008
NM_011650	209	157	219	188	193	259	226		235	802	518.5	382	434	408		0.0211704	0.0309979	0.0260842	0.0320492	0.0244455	0.0282473		0.000492014	0.00104506	0.000768539	0.000982685	0.000626076	0.00080438			0.0260842	0.0282473		0.000768539	0.00080438
NM_001038839	412	136	140	138	86	159	122.5		735	550	642.5	408	408	408		0.0183387	0.019816	0.0190774	0.014281	0.0150071	0.014644		0.00153885	0.00071669	0.00112777	0.00104957	0.000588569	0.000819069			0.0190774	0.014644		0.00112777	0.000819069
NM_153138	474	172	310	241	147	474	310.5		175	674	424.5	135	682	408.5		0.0231931	0.0438783	0.0335357	0.0244105	0.0447381	0.0345743		0.000366393	0.000878271	0.000622332	0.000347284	0.000983833	0.000665558			0.0335357	0.0345743		0.000622332	0.000665558
NM_007634	758	104	125	114.5	142	90	116		417	923	670	584	233	408.5		0.0140237	0.0176929	0.0158583	0.0235802	0.00849457	0.0160374		0.000873063	0.00120274	0.0010379	0.00150232	0.000336119	0.000919222			0.0158583	0.0160374		0.0010379	0.000919222
NM_011829	495	146	147	146.5	135	101	118		293	1220	756.5	425	392	408.5		0.0196872	0.0208068	0.020247	0.0224178	0.0095328	0.0159753		0.000613447	0.00158975	0.0011016	0.0010933	0.000565488	0.000829394			0.020247	0.0159753		0.0011016	0.000829394
NM_025840	400	69	141	105	96	96	96		528	1036	782	435	382	408.5		0.00930421	0.0199575	0.0146309	0.0159415	0.00906088	0.0125012		0.00110546	0.00134998	0.00122772	0.00111903	0.000551062	0.000835044			0.0146309	0.0125012		0.00122772	0.000835044
NM_001039194	354	134	118	126	102	134	118		533	690	611.5	497	322	409.5		0.018069	0.0167021	0.0173855	0.0169379	0.0126475	0.0147927		0.00111593	0.00089912	0.00100752	0.00127852	0.000464508	0.000871513			0.0173855	0.0147927		0.00100752	0.000871513
NM_001038845	423	136	140	138	85	159	122		735	543	639	408	411	409.5		0.0183387	0.019816	0.0190774	0.0141149	0.0150071	0.014561		0.00153885	0.000707568	0.00112321	0.00104957	0.000592896	0.000821233			0.0190774	0.014561		0.00112321	0.000821233
NM_134038	504	200	141	170.5	104	110	107		465	1097	781	373	447	410		0.0269687	0.0199575	0.0234631	0.01727	0.0103823	0.0138261		0.000973559	0.00142947	0.00120151	0.000959532	0.000644829	0.000802181			0.0234631	0.0138261		0.00120151	0.000802181
NM_001040683	730	390	650	520	376	865	620.5		192	1113	652.5	176	645	410.5		0.052589	0.0920028	0.0722959	0.0624377	0.0816423	0.07204		0.000401986	0.00145032	0.000926153	0.000452755	0.000930458	0.000691607			0.0722959	0.07204		0.000926153	0.000691607
NM_008655	141	3201	3111	3156	284	620	452		3676	3094	3385	453	368	410.5		0.431634	0.44034	0.435987	0.0471604	0.0585182	0.0528393		0.00769635	0.00403171	0.00586403	0.00116533	0.000530866	0.000848098			0.435987	0.0528393		0.00586403	0.000848098
NM_001081193	899	116	93	104.5	124	158	141		421	870	645.5	296	526	411		0.0156419	0.0131635	0.0144027	0.0205912	0.0149127	0.0177519		0.000881437	0.00113367	0.00100756	0.000761452	0.000758792	0.000760122			0.0144027	0.0177519		0.00100756	0.000760122
NM_001252316	482	177	241	209	210	256	233		430	637	533.5	530	293	411.5		0.0238673	0.0341118	0.0289896	0.0348721	0.0241623	0.0295172		0.00090028	0.000830057	0.000865169	0.00136341	0.000422673	0.000893042			0.0289896	0.0295172		0.000865169	0.000893042
NM_001033225	278	753	563	658	283	400	341.5		484	1386	935	286	537	411.5		0.101537	0.0796886	0.0906129	0.0469944	0.0377537	0.042374		0.00101334	0.00180606	0.0014097	0.000735727	0.00077466	0.000755194			0.0906129	0.042374		0.0014097	0.000755194
NM_001029842	588	203	143	173	106	110	108		468	1105	786.5	374	450	412		0.0273732	0.0202406	0.0238069	0.0176021	0.0103823	0.0139922		0.00097984	0.0014399	0.00120987	0.000962105	0.000649157	0.000805631			0.0238069	0.0139922		0.00120987	0.000805631
NM_028230	485	177	241	209	210	257	233.5		439	667	553	530	295	412.5		0.0238673	0.0341118	0.0289896	0.0348721	0.0242567	0.0295644		0.000919123	0.000869149	0.000894136	0.00136341	0.000425558	0.000894484			0.0289896	0.0295644		0.000894136	0.000894484
NM_133949	397	88	130	109	101	131	116		391	1197	794	308	517	412.5		0.0118662	0.0184006	0.0151334	0.0167718	0.0123643	0.0145681		0.000818627	0.00155978	0.0011892	0.000792322	0.000745809	0.000769065			0.0151334	0.0145681		0.0011892	0.000769065
NM_001010833	1689	106	156	131	150	180	165		256	994	625	315	511	413		0.0142934	0.0220807	0.018187	0.0249087	0.0169891	0.0209489		0.000535981	0.00129525	0.000915617	0.000810329	0.000737154	0.000773741			0.018187	0.0209489		0.000915617	0.000773741
NM_001015099	697	127	129	128	119	87	103		294	1245	769.5	262	564	413		0.0171251	0.018259	0.0176921	0.0197609	0.00821142	0.0139861		0.000615541	0.00162233	0.00111893	0.000673988	0.00081361	0.000743799			0.0176921	0.0139861		0.00111893	0.000743799
NM_026456	93	216	364	290	148	595	371.5		313	637	475	263	564	413.5		0.0291262	0.0515216	0.0403239	0.0245766	0.0561586	0.0403676		0.00065532	0.000830057	0.000742689	0.00067656	0.00081361	0.000745085			0.0403239	0.0403676		0.000742689	0.000745085
NM_033609	770	392	666	529	387	907	647		192	1128	660	176	651	413.5		0.0528587	0.0942675	0.0735631	0.0642644	0.0856064	0.0749354		0.000401986	0.00146987	0.000935926	0.000452755	0.000939113	0.000695934			0.0735631	0.0749354		0.000935926	0.000695934
NM_023243	304	175	137	156	113	103	108		343	1003	673	213	615	414		0.0235976	0.0193914	0.0214945	0.0187645	0.00972157	0.014243		0.000718131	0.00130698	0.00101256	0.000547937	0.000887181	0.000717559			0.0214945	0.014243		0.00101256	0.000717559
NM_001243748	321	244	283	263.5	215	288	251.5		445	1063	754	424	404	414		0.0329018	0.0400566	0.0364792	0.0357024	0.0271826	0.0314425		0.000931685	0.00138517	0.00115843	0.00109073	0.000582799	0.000836764			0.0364792	0.0314425		0.00115843	0.000836764
NM_001190786	475	169	213	191	201	197	199		287	746	516.5	378	451	414.5		0.0227886	0.0301486	0.0264686	0.0333776	0.0185937	0.0259856		0.000600885	0.000972092	0.000786488	0.000972395	0.000650599	0.000811497			0.0264686	0.0259856		0.000786488	0.000811497
NM_153153	2151	87	119	103	157	147	152		322	712	517	411	418	414.5		0.0117314	0.0168436	0.0142875	0.0260711	0.0138745	0.0199728		0.000674163	0.000927788	0.000800976	0.00105729	0.000602994	0.00083014			0.0142875	0.0199728		0.000800976	0.00083014
NM_173751	613	174	176	175	161	139	150		451	716	583.5	470	359	414.5		0.0234628	0.0249115	0.0241872	0.0267353	0.0131194	0.0199273		0.000944248	0.000933	0.000938624	0.00120906	0.000517883	0.000863473			0.0241872	0.0199273		0.000938624	0.000863473
NM_175116	325	116	109	112.5	60	98	79		484	1215	849.5	330	500	415		0.0156419	0.0154282	0.015535	0.00996347	0.00924965	0.00960656		0.00101334	0.00158323	0.00129829	0.000848916	0.000721285	0.000785101			0.015535	0.00960656		0.00129829	0.000785101
NM_008866	211	148	219	183.5	148	347	247.5		230	673	451.5	302	531	416.5		0.0199569	0.0309979	0.0254774	0.0245766	0.0327513	0.0286639		0.000481545	0.000876968	0.000679257	0.000776887	0.000766005	0.000771446			0.0254774	0.0286639		0.000679257	0.000771446
NM_178601	272	158	253	205.5	184	330	257		405	720	562.5	426	407	416.5		0.0213053	0.0358103	0.0285578	0.0305546	0.0311468	0.0308507		0.000847938	0.000938212	0.000893075	0.00109587	0.000587126	0.0008415			0.0285578	0.0308507		0.000893075	0.0008415
NM_018875	147	159	205	182	136	349	242.5		328	425	376.5	465	369	417		0.0214401	0.0290163	0.0252282	0.0225839	0.0329401	0.027762		0.000686725	0.000553806	0.000620266	0.0011962	0.000532309	0.000864254			0.0252282	0.027762		0.000620266	0.000864254
NM_026169	447	101	143	122	176	278	227		311	610	460.5	416	419	417.5		0.0136192	0.0202406	0.0169299	0.0292262	0.0262388	0.0277325		0.000651133	0.000794874	0.000723004	0.00107015	0.000604437	0.000837293			0.0169299	0.0277325		0.000723004	0.000837293
NM_027218	157	235	148	191.5	197	118	157.5		771	168	469.5	657	179	418		0.0316882	0.0209483	0.0263183	0.0327134	0.0111373	0.0219254		0.00161422	0.000218916	0.00091657	0.00169011	0.00025822	0.000974167			0.0263183	0.0219254		0.00091657	0.000974167
NM_001081128	1234	143	163	153	110	130	120		357	1227	792	368	468	418		0.0192826	0.0230715	0.0211771	0.0182664	0.0122699	0.0152681		0.000747442	0.00159887	0.00117316	0.00094667	0.000675123	0.000810897			0.0211771	0.0152681		0.00117316	0.000810897
NM_001146180	726	127	213	170	131	171	151		361	1451	906	289	547	418		0.0171251	0.0301486	0.0236369	0.0217536	0.0161397	0.0189466		0.000755817	0.00189076	0.00132329	0.000743445	0.000789086	0.000766265			0.0236369	0.0189466		0.00132329	0.000766265
NM_029231	1104	158	225	191.5	157	189	173		281	1245	763	379	458	418.5		0.0213053	0.0318471	0.0265762	0.0260711	0.0178386	0.0219548		0.000588323	0.00162233	0.00110532	0.000974967	0.000660697	0.000817832			0.0265762	0.0219548		0.00110532	0.000817832
NM_033601	429	278	377	327.5	161	184	172.5		439	2006	1222.5	390	447	418.5		0.0374865	0.0533616	0.0454241	0.0267353	0.0173667	0.022051		0.000919123	0.00261396	0.00176654	0.00100326	0.000644829	0.000824047			0.0454241	0.022051		0.00176654	0.000824047
NM_021293	315	137	69	103	137	113	125		442	408	425	520	318	419		0.0184736	0.00976645	0.01412	0.0227499	0.0106654	0.0167077		0.000925404	0.000531654	0.000728529	0.00133769	0.000458737	0.000898212			0.01412	0.0167077		0.000728529	0.000898212
NM_145589	593	117	126	121.5	97	127	112		203	1162	682.5	185	654	419.5		0.0157767	0.0178344	0.0168055	0.0161076	0.0119868	0.0140472		0.000425016	0.00151417	0.000969593	0.000475908	0.000943441	0.000709674			0.0168055	0.0140472		0.000969593	0.000709674
NM_029887	292	155	245	200	140	390	265		329	502	415.5	470	370	420		0.0209008	0.034678	0.0277894	0.0232481	0.0368098	0.030029		0.000688819	0.000654142	0.000671481	0.00120906	0.000533751	0.000871407			0.0277894	0.030029		0.000671481	0.000871407
NM_001110201	289	155	245	200	140	392	266		330	502	416	470	370	420		0.0209008	0.034678	0.0277894	0.0232481	0.0369986	0.0301233		0.000690913	0.000654142	0.000672528	0.00120906	0.000533751	0.000871407			0.0277894	0.0301233		0.000672528	0.000871407
NM_177662	293	162	125	143.5	116	256	186		371	583	477	397	443	420		0.0218447	0.0176929	0.0197688	0.0192627	0.0241623	0.0217125		0.000776754	0.000759691	0.000768222	0.00102127	0.000639059	0.000830165			0.0197688	0.0217125		0.000768222	0.000830165
NM_024172	338	84	164	124	107	165	136		437	1044	740.5	446	394	420		0.0113269	0.023213	0.0172699	0.0177682	0.0155734	0.0166708		0.000914936	0.00136041	0.00113767	0.00114732	0.000568373	0.000857848			0.0172699	0.0166708		0.00113767	0.000857848
NM_172284	460	170	213	191.5	202	197	199.5		296	755	525.5	389	452	420.5		0.0229234	0.0301486	0.026536	0.0335437	0.0185937	0.0260687		0.000619728	0.00098382	0.000801774	0.00100069	0.000652042	0.000826367			0.026536	0.0260687		0.000801774	0.000826367
NM_023585	126	220	191	205.5	262	305	283.5		178	537	357.5	199	643	421		0.0296656	0.0270347	0.0283501	0.0435071	0.0287872	0.0361472		0.000372674	0.00069975	0.000536212	0.000511922	0.000927573	0.000719747			0.0283501	0.0361472		0.000536212	0.000719747
NM_026438	270	200	189	194.5	237	322	279.5		224	557	390.5	344	498	421		0.0269687	0.0267516	0.0268602	0.0393557	0.0303917	0.0348737		0.000468983	0.000725811	0.000597397	0.000884931	0.0007184	0.000801665			0.0268602	0.0348737		0.000597397	0.000801665
NM_008453	325	185	131	158	186	183	184.5		201	755	478	326	516	421		0.0249461	0.0185421	0.0217441	0.0308867	0.0172723	0.0240795		0.000420829	0.00098382	0.000702324	0.000838626	0.000744366	0.000791496			0.0217441	0.0240795		0.000702324	0.000791496
NM_001081499	1095	158	154	156	154	155	154.5		132	1049	590.5	194	649	421.5		0.0213053	0.0217976	0.0215514	0.0255729	0.0146295	0.0201012		0.000276365	0.00136692	0.000821644	0.00049906	0.000936228	0.000717644			0.0215514	0.0201012		0.000821644	0.000717644
NM_026165	399	110	99	104.5	94	115	104.5		297	1016	656.5	225	620	422.5		0.0148328	0.0140127	0.0144228	0.0156094	0.0108542	0.0132318		0.000621822	0.00132392	0.000972872	0.000578806	0.000894394	0.0007366			0.0144228	0.0132318		0.000972872	0.0007366
NM_025459	337	333	125	229	218	166	192		1141	550	845.5	560	285	422.5		0.0449029	0.0176929	0.0312979	0.0362006	0.0156678	0.0259342		0.00238888	0.00071669	0.00155279	0.00144058	0.000411133	0.000925859			0.0312979	0.0259342		0.00155279	0.000925859
NM_001122873	361	111	149	130	102	394	248		177	510	343.5	172	674	423		0.0149676	0.0210899	0.0180288	0.0169379	0.0371874	0.0270626		0.000370581	0.000664567	0.000517574	0.000442465	0.000972293	0.000707379			0.0180288	0.0270626		0.000517574	0.000707379
NM_027086	361	111	149	130	102	394	248		177	510	343.5	172	674	423		0.0149676	0.0210899	0.0180288	0.0169379	0.0371874	0.0270626		0.000370581	0.000664567	0.000517574	0.000442465	0.000972293	0.000707379			0.0180288	0.0270626		0.000517574	0.000707379
NM_028820	1004	191	171	181	160	199	179.5		461	1144	802.5	425	421	423		0.0257551	0.0242038	0.0249795	0.0265692	0.0187824	0.0226758		0.000965184	0.00149071	0.00122795	0.0010933	0.000607322	0.000850312			0.0249795	0.0226758		0.00122795	0.000850312
NM_025577	150	68	142	105	78	163	120.5		509	266	387.5	728	119	423.5		0.00916936	0.0200991	0.0146342	0.0129525	0.0153846	0.0141686		0.00106568	0.000346617	0.000706149	0.00187276	0.000171666	0.00102221			0.0146342	0.0141686		0.000706149	0.00102221
NM_025456	262	195	132	163.5	170	264	217		370	458	414	353	494	423.5		0.0262945	0.0186837	0.0224891	0.0282298	0.0249174	0.0265736		0.00077466	0.000596807	0.000685734	0.000908083	0.00071263	0.000810356			0.0224891	0.0265736		0.000685734	0.000810356
NM_011640	371	411	611	511	513	818	665.5		117	982	549.5	298	549	423.5		0.0554207	0.0864827	0.0709517	0.0851876	0.0772062	0.0811969		0.00024496	0.00127962	0.000762289	0.000766597	0.000791971	0.000779284			0.0709517	0.0811969		0.000762289	0.000779284
NM_019455	180	177	157	167	138	183	160.5		297	600	448.5	340	508	424		0.0238673	0.0222222	0.0230448	0.022916	0.0172723	0.0200941		0.000621822	0.000781844	0.000701833	0.000874641	0.000732826	0.000803733			0.0230448	0.0200941		0.000701833	0.000803733
NM_028447	424	172	241	206.5	178	337	257.5		357	725	541	389	459	424		0.0231931	0.0341118	0.0286525	0.0295583	0.0318075	0.0306829		0.000747442	0.000944728	0.000846085	0.00100069	0.00066214	0.000831416			0.0286525	0.0306829		0.000846085	0.000831416
NM_019993	499	169	254	211.5	147	215	181		304	1292	798	348	501	424.5		0.0227886	0.0359519	0.0293702	0.0244105	0.0202926	0.0223515		0.000636477	0.00168357	0.00116002	0.000895221	0.000722728	0.000808974			0.0293702	0.0223515		0.00116002	0.000808974
NM_001013366	729	136	146	141	89	123	106		549	1082	815.5	411	438	424.5		0.0183387	0.0206653	0.019502	0.0147791	0.0116092	0.0131942		0.00114943	0.00140992	0.00127968	0.00105729	0.000631846	0.000844566			0.019502	0.0131942		0.00127968	0.000844566
NM_009183	340	181	185	183	371	376	373.5		119	538	328.5	169	681	425		0.0244067	0.0261854	0.0252961	0.0616074	0.0354884	0.0485479		0.000249147	0.000701053	0.0004751	0.000434748	0.000982391	0.000708569			0.0252961	0.0485479		0.0004751	0.000708569
NM_025567	306	192	306	249	229	313	271		316	743	529.5	334	519	426.5		0.02589	0.0433121	0.034601	0.0380272	0.0295422	0.0337847		0.000661601	0.000968183	0.000814892	0.000859206	0.000748694	0.00080395			0.034601	0.0337847		0.000814892	0.00080395
NM_023041	280	139	165	152	121	298	209.5		359	758	558.5	353	500	426.5		0.0187433	0.0233546	0.0210489	0.020093	0.0281265	0.0241097		0.000751629	0.000987729	0.000869679	0.000908083	0.000721285	0.000814684			0.0210489	0.0241097		0.000869679	0.000814684
NM_001244891	467	264	232	248	268	263	265.5		250	900	575	309	544	426.5		0.0355987	0.0328379	0.0342183	0.0445035	0.024823	0.0346633		0.000523419	0.00117277	0.000848092	0.000794894	0.000784758	0.000789826			0.0342183	0.0346633		0.000848092	0.000789826
NM_001244903	467	264	232	248	268	263	265.5		250	900	575	309	544	426.5		0.0355987	0.0328379	0.0342183	0.0445035	0.024823	0.0346633		0.000523419	0.00117277	0.000848092	0.000794894	0.000784758	0.000789826			0.0342183	0.0346633		0.000848092	0.000789826
NM_198683	467	264	232	248	268	263	265.5		250	892	571	309	545	427		0.0355987	0.0328379	0.0342183	0.0445035	0.024823	0.0346633		0.000523419	0.00116234	0.00084288	0.000794894	0.000786201	0.000790548			0.0342183	0.0346633		0.00084288	0.000790548
NM_144491	419	71	131	101	83	152	117.5		417	1162	789.5	359	495	427		0.00957389	0.0185421	0.014058	0.0137828	0.0143464	0.0140646		0.000873063	0.00151417	0.00119362	0.000923518	0.000714072	0.000818795			0.014058	0.0140646		0.00119362	0.000818795
NM_023750	540	139	140	139.5	116	138	127		295	906	600.5	264	591	427.5		0.0187433	0.019816	0.0192796	0.0192627	0.013025	0.0161439		0.000617634	0.00118058	0.000899109	0.000679133	0.000852559	0.000765846			0.0192796	0.0161439		0.000899109	0.000765846
NM_001164360	329	270	131	200.5	241	136	188.5		374	613	493.5	447	409	428		0.0364078	0.0185421	0.0274749	0.0400199	0.0128362	0.0264281		0.000783035	0.000798783	0.000790909	0.0011499	0.000590011	0.000869953			0.0274749	0.0264281		0.000790909	0.000869953
NM_145502	329	270	131	200.5	241	136	188.5		374	613	493.5	447	409	428		0.0364078	0.0185421	0.0274749	0.0400199	0.0128362	0.0264281		0.000783035	0.000798783	0.000790909	0.0011499	0.000590011	0.000869953			0.0274749	0.0264281		0.000790909	0.000869953
NM_001164359	329	270	131	200.5	241	136	188.5		374	613	493.5	447	409	428		0.0364078	0.0185421	0.0274749	0.0400199	0.0128362	0.0264281		0.000783035	0.000798783	0.000790909	0.0011499	0.000590011	0.000869953			0.0274749	0.0264281		0.000790909	0.000869953
NM_172773	476	127	129	128	87	177	132		442	655	548.5	362	494	428		0.0171251	0.018259	0.0176921	0.014447	0.016706	0.0155765		0.000925404	0.000853512	0.000889458	0.000931235	0.00071263	0.000821933			0.0176921	0.0155765		0.000889458	0.000821933
NM_013760	203	183	179	181	118	197	157.5		242	934	588	95	762	428.5		0.0246764	0.0253362	0.0250063	0.0195948	0.0185937	0.0190942		0.000506669	0.00121707	0.00086187	0.000244385	0.00109924	0.000671812			0.0250063	0.0190942		0.00086187	0.000671812
NM_144549	353	253	302	277.5	246	202	224		248	2181	1214.5	197	660	428.5		0.0341154	0.0427459	0.0384307	0.0408502	0.0190656	0.0299579		0.000519231	0.002842	0.00168062	0.000506777	0.000952097	0.000729437			0.0384307	0.0299579		0.00168062	0.000729437
NM_023764	255	183	201	192	166	248	207		417	626	521.5	390	468	429		0.0246764	0.0284501	0.0265632	0.0275656	0.0234073	0.0254864		0.000873063	0.000815723	0.000844393	0.00100326	0.000675123	0.000839194			0.0265632	0.0254864		0.000844393	0.000839194
NM_172977	798	136	87	111.5	125	136	130.5		270	990	630	309	549	429		0.0183387	0.0123142	0.0153265	0.0207572	0.0128362	0.0167967		0.000565292	0.00129004	0.000927667	0.000794894	0.000791971	0.000793433			0.0153265	0.0167967		0.000927667	0.000793433
NM_026027	103	119	220	169.5	128	359	243.5		435	247	341	513	346	429.5		0.0160464	0.0311394	0.0235929	0.0212554	0.0338839	0.0275697		0.000910749	0.000321859	0.000616304	0.00131968	0.000499129	0.000909404			0.0235929	0.0275697		0.000616304	0.000909404
NM_001190310	190	237	152	194.5	196	123	159.5		780	173	476.5	663	196	429.5		0.0319579	0.0215145	0.0267362	0.0325473	0.0116092	0.0220783		0.00163307	0.000225432	0.000929249	0.00170555	0.000282744	0.000994147			0.0267362	0.0220783		0.000929249	0.000994147
NM_001004143	506	282	299	290.5	290	293	291.5		379	738	558.5	494	365	429.5		0.0380259	0.0423213	0.0401736	0.0481568	0.0276546	0.0379057		0.000793503	0.000961668	0.000877585	0.0012708	0.000526538	0.00089867			0.0401736	0.0379057		0.000877585	0.00089867
NM_001115009	1287	99	127	113	143	232	187.5		125	913	519	187	674	430.5		0.0133495	0.0179759	0.0156627	0.0237463	0.0218971	0.0228217		0.000261709	0.00118971	0.000725707	0.000481052	0.000972293	0.000726672			0.0156627	0.0228217		0.000725707	0.000726672
NM_025380	155	122	245	183.5	125	369	247		389	560	474.5	427	436	431.5		0.0164509	0.034678	0.0255645	0.0207572	0.0348277	0.0277925		0.00081444	0.000729721	0.00077208	0.00109845	0.000628961	0.000863703			0.0255645	0.0277925		0.00077208	0.000863703
NM_025379	61	201	764	482.5	231	1137	684		251	846	548.5	262	601	431.5		0.0271036	0.108139	0.0676211	0.0383593	0.107315	0.0728371		0.000525512	0.0011024	0.000813956	0.000673988	0.000866985	0.000770486			0.0676211	0.0728371		0.000813956	0.000770486
NM_001164571	317	136	115	125.5	60	72	66		805	1118	961.5	429	437	433		0.0183387	0.0162774	0.0173081	0.00996347	0.00679566	0.00837956		0.00168541	0.00145684	0.00157112	0.00110359	0.000630403	0.000866997			0.0173081	0.00837956		0.00157112	0.000866997
NM_144800	740	133	226	179.5	130	186	158		413	1541	977	289	577	433		0.0179342	0.0319887	0.0249614	0.0215875	0.0175555	0.0195715		0.000864688	0.00200803	0.00143636	0.000743445	0.000832363	0.000787904			0.0249614	0.0195715		0.00143636	0.000787904
NM_029626	352	115	99	107	117	151	134		271	675	473	251	617	434		0.015507	0.0140127	0.0147599	0.0194288	0.014252	0.0168404		0.000567386	0.000879574	0.00072348	0.000645691	0.000890066	0.000767878			0.0147599	0.0168404		0.00072348	0.000767878
NM_001165930	352	115	99	107	117	151	134		271	675	473	251	617	434		0.015507	0.0140127	0.0147599	0.0194288	0.014252	0.0168404		0.000567386	0.000879574	0.00072348	0.000645691	0.000890066	0.000767878			0.0147599	0.0168404		0.00072348	0.000767878
NM_030557	591	111	89	100	98	132	115		319	686	502.5	210	658	434		0.0149676	0.0125973	0.0137825	0.0162737	0.0124587	0.0143662		0.000667882	0.000893908	0.000780895	0.000540219	0.000949211	0.000744715			0.0137825	0.0143662		0.000780895	0.000744715
NM_016686	499	183	155	169	147	136	141.5		201	953	577	227	641	434		0.0246764	0.0219391	0.0233078	0.0244105	0.0128362	0.0186234		0.000420829	0.00124183	0.000831328	0.000583951	0.000924688	0.00075432			0.0233078	0.0186234		0.000831328	0.00075432
NM_001109971	49	329	751	540	244	959	601.5		379	319	349	578	291	434.5		0.0443635	0.106299	0.0753311	0.0405181	0.0905144	0.0655162		0.000793503	0.00041568	0.000604592	0.00148689	0.000419788	0.000953339			0.0753311	0.0655162		0.000604592	0.000953339
NM_001109972	49	329	751	540	244	959	601.5		379	319	349	578	291	434.5		0.0443635	0.106299	0.0753311	0.0405181	0.0905144	0.0655162		0.000793503	0.00041568	0.000604592	0.00148689	0.000419788	0.000953339			0.0753311	0.0655162		0.000604592	0.000953339
NM_026381	113	794	833	813.5	703	1348	1025.5		378	540	459	361	508	434.5		0.107066	0.117905	0.112485	0.116739	0.12723	0.121984		0.000791409	0.000703659	0.000747534	0.000928663	0.000732826	0.000830744			0.112485	0.121984		0.000747534	0.000830744
NM_172338	753	195	179	187	177	174	175.5		343	788	565.5	297	573	435		0.0262945	0.0253362	0.0258153	0.0293922	0.0164228	0.0229075		0.000718131	0.00102682	0.000872476	0.000764024	0.000826593	0.000795309			0.0258153	0.0229075		0.000872476	0.000795309
NM_018888	276	102	122	112	124	143	133.5		292	555	423.5	464	407	435.5		0.013754	0.0172682	0.0155111	0.0205912	0.0134969	0.017044		0.000611353	0.000723205	0.000667279	0.00119363	0.000587126	0.000890377			0.0155111	0.017044		0.000667279	0.000890377
NM_025334	151	181	165	173	197	229	213		262	483	372.5	337	535	436		0.0244067	0.0233546	0.0238806	0.0327134	0.021614	0.0271637		0.000548543	0.000629384	0.000588963	0.000866923	0.000771775	0.000819349			0.0238806	0.0271637		0.000588963	0.000819349
NM_013585	200	132	182	157	169	785	477		238	250	244	304	569	436.5		0.0177994	0.0257608	0.0217801	0.0280638	0.0740916	0.0510777		0.000498295	0.000325768	0.000412031	0.000782032	0.000820823	0.000801427			0.0217801	0.0510777		0.000412031	0.000801427
NM_001253812	547	97	180	138.5	132	183	157.5		431	741	586	501	372	436.5		0.0130798	0.0254777	0.0192788	0.0219196	0.0172723	0.019596		0.000902374	0.000965577	0.000933975	0.00128881	0.000536636	0.000912723			0.0192788	0.019596		0.000933975	0.000912723
NM_007482	304	85	400	242.5	71	129	100		462	2427	1444.5	458	415	436.5		0.0114617	0.0566171	0.0340394	0.0117901	0.0121756	0.0119828		0.000967278	0.00316256	0.00206492	0.00117819	0.000598667	0.00088843			0.0340394	0.0119828		0.00206492	0.00088843
NM_019925	363	1319	1167	1243	367	441	404		1520	2360	1940	432	441	436.5		0.177859	0.16518	0.17152	0.0609432	0.0416234	0.0512833		0.00318239	0.00307525	0.00312882	0.00111131	0.000636174	0.000873741			0.17152	0.0512833		0.00312882	0.000873741
NM_026703	153	163	254	208.5	157	441	299		250	478	364	463	411	437		0.0219795	0.0359519	0.0289657	0.0260711	0.0416234	0.0338472		0.000523419	0.000622869	0.000573144	0.00119105	0.000592896	0.000891976			0.0289657	0.0338472		0.000573144	0.000891976
NM_010887	156	184	356	270	132	613	372.5		389	598	493.5	360	514	437		0.0248112	0.0503892	0.0376002	0.0219196	0.0578575	0.0398886		0.00081444	0.000779237	0.000796839	0.00092609	0.000741481	0.000833786			0.0376002	0.0398886		0.000796839	0.000833786
NM_026355	283	134	102	118	135	171	153		171	604	387.5	343	532	437.5		0.018069	0.0144374	0.0162532	0.0224178	0.0161397	0.0192787		0.000358018	0.000787056	0.000572537	0.000882358	0.000767448	0.000824903			0.0162532	0.0192787		0.000572537	0.000824903
NM_027360	39	224	339	281.5	132	340	236		279	750	514.5	326	549	437.5		0.030205	0.047983	0.039094	0.0219196	0.0320906	0.0270051		0.000584135	0.000977304	0.00078072	0.000838626	0.000791971	0.000815299			0.039094	0.0270051		0.00078072	0.000815299
NM_025589	87	601	823	712	721	1291	1006		524	523	523.5	455	420	437.5		0.081041	0.11649	0.0987654	0.119728	0.12185	0.120789		0.00109709	0.000681507	0.000889296	0.00117048	0.00060588	0.000888177			0.0987654	0.120789		0.000889296	0.000888177
NM_029271	168	121	155	138	130	226	178		355	561	458	425	451	438		0.0163161	0.0219391	0.0191276	0.0215875	0.0213308	0.0214592		0.000743255	0.000731024	0.000737139	0.0010933	0.000650599	0.00087195			0.0191276	0.0214592		0.000737139	0.00087195
NM_007383	393	86	172	129	128	286	207		209	961	585	252	625	438.5		0.0115965	0.0243454	0.017971	0.0212554	0.0269939	0.0241246		0.000437578	0.00125225	0.000844915	0.000648263	0.000901607	0.000774935			0.017971	0.0241246		0.000844915	0.000774935
NM_010476	315	137	106	121.5	91	72	81.5		485	802	643.5	458	419	438.5		0.0184736	0.0150035	0.0167386	0.0151113	0.00679566	0.0109535		0.00101543	0.00104506	0.00103025	0.00117819	0.000604437	0.000891315			0.0167386	0.0109535		0.00103025	0.000891315
NM_001113488	315	317	610	463.5	239	524	381.5		431	1271	851	324	553	438.5		0.0427454	0.0863411	0.0645433	0.0396878	0.0494573	0.0445726		0.000902374	0.00165621	0.00127929	0.000833481	0.000797742	0.000815611			0.0645433	0.0445726		0.00127929	0.000815611
NM_017380	315	317	610	463.5	239	524	381.5		431	1271	851	324	553	438.5		0.0427454	0.0863411	0.0645433	0.0396878	0.0494573	0.0445726		0.000902374	0.00165621	0.00127929	0.000833481	0.000797742	0.000815611			0.0645433	0.0445726		0.00127929	0.000815611
NM_001163419	352	111	90	100.5	126	206	166		113	649	381	165	713	439		0.0149676	0.0127389	0.0138532	0.0209233	0.0194431	0.0201832		0.000236585	0.000845694	0.00054114	0.000424458	0.00102855	0.000726505			0.0138532	0.0201832		0.00054114	0.000726505
NM_011672	288	237	332	284.5	225	455	340		334	682	508	403	475	439		0.0319579	0.0469922	0.0394751	0.037363	0.0429448	0.0401539		0.000699288	0.000888695	0.000793991	0.00103671	0.000685221	0.000860964			0.0394751	0.0401539		0.000793991	0.000860964
NM_175021	668	164	168	166	220	308	264		184	1043	613.5	192	687	439.5		0.0221143	0.0237792	0.0229468	0.0365327	0.0290703	0.0328015		0.000385236	0.0013591	0.00087217	0.000493915	0.000991046	0.00074248			0.0229468	0.0328015		0.00087217	0.00074248
NM_026982	94	54	224	139	30	363	196.5		515	439	477	595	285	440		0.00728155	0.0317056	0.0194936	0.00498173	0.0342614	0.0196216		0.00107824	0.000572049	0.000825146	0.00153062	0.000411133	0.000970877			0.0194936	0.0196216		0.000825146	0.000970877
NM_011454	358	177	261	219	162	339	250.5		335	638	486.5	324	556	440		0.0238673	0.0369427	0.030405	0.0269014	0.0319962	0.0294488		0.000701381	0.00083136	0.000766371	0.000833481	0.000802069	0.000817775			0.030405	0.0294488		0.000766371	0.000817775
NM_133167	346	247	399	323	186	410	298		126	939	532.5	132	748	440		0.0333064	0.0564756	0.044891	0.0308867	0.0386975	0.0347921		0.000263803	0.00122359	0.000743694	0.000339566	0.00107904	0.000709305			0.044891	0.0347921		0.000743694	0.000709305
NM_001110253	1418	87	123	105	165	117	141		311	823	567	420	461	440.5		0.0117314	0.0174098	0.0145706	0.0273995	0.0110429	0.0192212		0.000651133	0.00107243	0.000861781	0.00108044	0.000665025	0.000872732			0.0145706	0.0192212		0.000861781	0.000872732
NM_148925	1418	87	123	105	165	117	141		311	823	567	420	461	440.5		0.0117314	0.0174098	0.0145706	0.0273995	0.0110429	0.0192212		0.000651133	0.00107243	0.000861781	0.00108044	0.000665025	0.000872732			0.0145706	0.0192212		0.000861781	0.000872732
NM_001159888	170	429	517	473	365	758	561.5		312	888	600	255	626	440.5		0.0578479	0.0731776	0.0655128	0.0606111	0.0715432	0.0660771		0.000653227	0.00115713	0.000905178	0.000655981	0.000903049	0.000779515			0.0655128	0.0660771		0.000905178	0.000779515
NM_001159889	170	429	517	473	365	758	561.5		312	891	601.5	255	626	440.5		0.0578479	0.0731776	0.0655128	0.0606111	0.0715432	0.0660771		0.000653227	0.00116104	0.000907132	0.000655981	0.000903049	0.000779515			0.0655128	0.0660771		0.000907132	0.000779515
NM_029291	730	150	263	206.5	178	257	217.5		444	847	645.5	442	440	441		0.0202265	0.0372258	0.0287261	0.0295583	0.0242567	0.0269075		0.000929592	0.0011037	0.00101665	0.00113703	0.000634731	0.000885882			0.0287261	0.0269075		0.00101665	0.000885882
NM_133708	401	97	177	137	109	206	157.5		284	760	522	351	532	441.5		0.0130798	0.0250531	0.0190665	0.0181003	0.0194431	0.0187717		0.000594604	0.000990335	0.000792469	0.000902938	0.000767448	0.000835193			0.0190665	0.0187717		0.000792469	0.000835193
NM_001170911	118	213	315	264	230	401	315.5		371	693	532	365	520	442.5		0.0287217	0.044586	0.0366538	0.0381933	0.037848	0.0380207		0.000776754	0.000903029	0.000839891	0.000938953	0.000750137	0.000844545			0.0366538	0.0380207		0.000839891	0.000844545
NM_025385	118	213	315	264	230	401	315.5		371	693	532	365	520	442.5		0.0287217	0.044586	0.0366538	0.0381933	0.037848	0.0380207		0.000776754	0.000903029	0.000839891	0.000938953	0.000750137	0.000844545			0.0366538	0.0380207		0.000839891	0.000844545
NM_029705	336	270	254	262	171	247	209		484	1202	843	180	705	442.5		0.0364078	0.0359519	0.0361798	0.0283959	0.0233129	0.0258544		0.00101334	0.00156629	0.00128982	0.000463045	0.00101701	0.000740029			0.0361798	0.0258544		0.00128982	0.000740029
NM_001034851	461	378	160	269	250	215	232.5		1168	591	879.5	570	316	443		0.0509709	0.0226469	0.0368089	0.0415144	0.0202926	0.0309035		0.00244541	0.000770116	0.00160776	0.00146631	0.000455852	0.000961081			0.0368089	0.0309035		0.00160776	0.000961081
NM_023248	231	498	434	466	442	643	542.5		408	407	407.5	519	369	444		0.0671521	0.0614296	0.0642908	0.0733975	0.060689	0.0670433		0.000854219	0.000530351	0.000692285	0.00133511	0.000532309	0.000933711			0.0642908	0.0670433		0.000692285	0.000933711
NM_001081309	1339	154	185	169.5	209	197	203		273	1054	663.5	348	540	444		0.0207659	0.0261854	0.0234757	0.0347061	0.0185937	0.0266499		0.000571573	0.00137344	0.000972506	0.000895221	0.000778988	0.000837104			0.0234757	0.0266499		0.000972506	0.000837104
NM_194348	1895	125	144	134.5	99	104	101.5		763	1335	1049	422	466	444		0.0168554	0.0203822	0.0186188	0.0164397	0.00981595	0.0131278		0.00159747	0.0017396	0.00166854	0.00108558	0.000672238	0.000878911			0.0186188	0.0131278		0.00166854	0.000878911
NM_025985	151	101	116	108.5	118	186	152		101	710	405.5	199	690	444.5		0.0136192	0.016419	0.0150191	0.0195948	0.0175555	0.0185751		0.000211461	0.000925181	0.000568321	0.000511922	0.000995374	0.000753648			0.0150191	0.0185751		0.000568321	0.000753648
NM_001164204	297	68	157	112.5	79	264	171.5		216	697	456.5	407	482	444.5		0.00916936	0.0222222	0.0156958	0.0131186	0.0249174	0.019018		0.000452234	0.000908242	0.000680238	0.001047	0.000695319	0.000871158			0.0156958	0.019018		0.000680238	0.000871158
NM_024168	297	68	157	112.5	79	264	171.5		216	697	456.5	407	482	444.5		0.00916936	0.0222222	0.0156958	0.0131186	0.0249174	0.019018		0.000452234	0.000908242	0.000680238	0.001047	0.000695319	0.000871158			0.0156958	0.019018		0.000680238	0.000871158
NM_145760	395	114	150	132	142	244	193		485	483	484	557	332	444.5		0.0153722	0.0212314	0.0183018	0.0235802	0.0230297	0.023305		0.00101543	0.000629384	0.000822408	0.00143287	0.000478933	0.0009559			0.0183018	0.023305		0.000822408	0.0009559
NM_001039175	183	545	674	609.5	477	818	647.5		399	678	538.5	320	569	444.5		0.0734898	0.0953999	0.0844448	0.0792096	0.0772062	0.0782079		0.000835376	0.000883483	0.00085943	0.000823191	0.000820823	0.000822007			0.0844448	0.0782079		0.00085943	0.000822007
NM_001159887	177	451	528	489.5	374	772	573		315	897	606	255	634	444.5		0.0608145	0.0747346	0.0677745	0.0621056	0.0728646	0.0674851		0.000659508	0.00116886	0.000914182	0.000655981	0.00091459	0.000785285			0.0677745	0.0674851		0.000914182	0.000785285
NM_007916	459	227	322	274.5	281	282	281.5		282	948	615	359	530	444.5		0.0306095	0.0455768	0.0380931	0.0466622	0.0266163	0.0366393		0.000590416	0.00123531	0.000912865	0.000923518	0.000764562	0.00084404			0.0380931	0.0366393		0.000912865	0.00084404
NM_017368	494	274	244	259	273	278	275.5		270	908	589	328	562	445		0.0369471	0.0345364	0.0357418	0.0453338	0.0262388	0.0357863		0.000565292	0.00118319	0.000874241	0.000843771	0.000810725	0.000827248			0.0357418	0.0357863		0.000874241	0.000827248
NM_009737	374	165	252	208.5	158	144	151		443	715	579	592	299	445.5		0.0222492	0.0356688	0.028959	0.0262371	0.0135913	0.0199142		0.000927498	0.000931697	0.000929597	0.0015229	0.000431329	0.000977116			0.028959	0.0199142		0.000929597	0.000977116
NM_001164256	226	219	166	192.5	165	227	196		656	419	537.5	534	359	446.5		0.0295307	0.0234961	0.0265134	0.0273995	0.0214252	0.0244124		0.00137345	0.000545987	0.000959719	0.0013737	0.000517883	0.000945792			0.0265134	0.0244124		0.000959719	0.000945792
NM_001164254	229	219	166	192.5	165	228	196.5		657	425	541	534	359	446.5		0.0295307	0.0234961	0.0265134	0.0273995	0.0215196	0.0244596		0.00137554	0.000553806	0.000964675	0.0013737	0.000517883	0.000945792			0.0265134	0.0244596		0.000964675	0.000945792
NM_031406	895	125	157	141	110	224	167		396	679	537.5	473	421	447		0.0168554	0.0222222	0.0195388	0.0182664	0.021142	0.0197042		0.000829095	0.000884786	0.000856941	0.00121678	0.000607322	0.000912051			0.0195388	0.0197042		0.000856941	0.000912051
NM_183017	620	91	132	111.5	91	156	123.5		326	820	573	372	523	447.5		0.0122708	0.0186837	0.0154772	0.0151113	0.0147239	0.0149176		0.000682538	0.00106852	0.000875529	0.00095696	0.000754464	0.000855712			0.0154772	0.0149176		0.000875529	0.000855712
NM_021383	280	112	182	147	123	259	191		301	995	648	342	553	447.5		0.0151025	0.0257608	0.0204316	0.0204251	0.0244455	0.0224353		0.000630196	0.00129656	0.000963377	0.000879786	0.000797742	0.000838764			0.0204316	0.0224353		0.000963377	0.000838764
NM_023377	194	97	147	122	170	187	178.5		304	489	396.5	483	414	448.5		0.0130798	0.0208068	0.0169433	0.0282298	0.0176498	0.0229398		0.000636477	0.000637202	0.00063684	0.0012425	0.000597224	0.000919864			0.0169433	0.0229398		0.00063684	0.000919864
NM_019499	186	198	197	197.5	244	235	239.5		295	716	505.5	496	401	448.5		0.026699	0.0278839	0.0272915	0.0405181	0.0221803	0.0313492		0.000617634	0.000933	0.000775317	0.00127595	0.000578471	0.000927209			0.0272915	0.0313492		0.000775317	0.000927209
NM_008515	609	282	238	260	166	323	244.5		629	674	651.5	482	415	448.5		0.0380259	0.0336872	0.0358565	0.0275656	0.0304861	0.0290258		0.00131692	0.000878271	0.0010976	0.00123993	0.000598667	0.000919299			0.0358565	0.0290258		0.0010976	0.000919299
NM_020569	170	275	418	346.5	307	413	360		574	444	509	669	230	449.5		0.037082	0.0591649	0.0481234	0.0509797	0.0389807	0.0449802		0.00120177	0.000578564	0.000890167	0.00172098	0.000331791	0.00102639			0.0481234	0.0449802		0.000890167	0.00102639
NM_023587	235	637	389	513	287	465	376		579	663	621	419	480	449.5		0.0858954	0.0550602	0.0704778	0.0476586	0.0438886	0.0457736		0.00121224	0.000863937	0.00103809	0.00107787	0.000692434	0.00088515			0.0704778	0.0457736		0.00103809	0.00088515
NM_028303	121	103	161	132	97	225	161		278	516	397	368	533	450.5		0.0138889	0.0227884	0.0183386	0.0161076	0.0212364	0.018672		0.000582042	0.000672385	0.000627214	0.00094667	0.00076889	0.00085778			0.0183386	0.018672		0.000627214	0.00085778
NM_025394	36	91	213	152	81	354	217.5		768	479	623.5	650	251	450.5		0.0122708	0.0301486	0.0212097	0.0134507	0.033412	0.0234313		0.00160794	0.000624172	0.00111606	0.00167211	0.000362085	0.0010171			0.0212097	0.0234313		0.00111606	0.0010171
NM_173442	409	128	104	116	59	82	70.5		471	1556	1013.5	238	663	450.5		0.01726	0.0147205	0.0159902	0.00979741	0.0077395	0.00876845		0.000986121	0.00202758	0.00150685	0.000612249	0.000956424	0.000784336			0.0159902	0.00876845		0.00150685	0.000784336
NM_010265	409	128	104	116	59	82	70.5		471	1556	1013.5	238	663	450.5		0.01726	0.0147205	0.0159902	0.00979741	0.0077395	0.00876845		0.000986121	0.00202758	0.00150685	0.000612249	0.000956424	0.000784336			0.0159902	0.00876845		0.00150685	0.000784336
NM_001136484	409	128	104	116	59	82	70.5		471	1556	1013.5	238	663	450.5		0.01726	0.0147205	0.0159902	0.00979741	0.0077395	0.00876845		0.000986121	0.00202758	0.00150685	0.000612249	0.000956424	0.000784336			0.0159902	0.00876845		0.00150685	0.000784336
NM_175335	320	357	258	307.5	338	651	494.5		120	588	354	169	733	451		0.0481392	0.036518	0.0423286	0.0561275	0.0614441	0.0587858		0.000251241	0.000766207	0.000508724	0.000434748	0.0010574	0.000746076			0.0423286	0.0587858		0.000508724	0.000746076
NM_016877	556	148	158	153	82	288	185		245	811	528	146	757	451.5		0.0199569	0.0223638	0.0211603	0.0136167	0.0271826	0.0203997		0.00051295	0.00105679	0.000784871	0.000375581	0.00109203	0.000733803			0.0211603	0.0203997		0.000784871	0.000733803
NM_145600	297	192	229	210.5	103	238	170.5		518	738	628	525	379	452		0.02589	0.0324133	0.0291516	0.017104	0.0224634	0.0197837		0.00108452	0.000961668	0.0010231	0.00135055	0.000546734	0.000948641			0.0291516	0.0197837		0.0010231	0.000948641
NM_010273	428	230	284	257	248	250	249		298	1052	675	367	537	452		0.031014	0.0401982	0.0356061	0.0411823	0.023596	0.0323892		0.000623915	0.00137083	0.000997374	0.000944098	0.00077466	0.000859379			0.0356061	0.0323892		0.000997374	0.000859379
NM_026141	473	382	194	288	398	353	375.5		202	528	365	217	688	452.5		0.0515102	0.0274593	0.0394848	0.066091	0.0333176	0.0497043		0.000422922	0.000688022	0.000555472	0.000558227	0.000992489	0.000775358			0.0394848	0.0497043		0.000555472	0.000775358
NM_020558	122	200	163	181.5	188	179	183.5		248	520	384	323	583	453		0.0269687	0.0230715	0.0250201	0.0312189	0.0168948	0.0240568		0.000519231	0.000677598	0.000598415	0.000830909	0.000841019	0.000835964			0.0250201	0.0240568		0.000598415	0.000835964
NM_145445	332	133	183	158	128	172	150		412	661	536.5	656	250	453		0.0179342	0.0259023	0.0219183	0.0212554	0.0162341	0.0187447		0.000862594	0.000861331	0.000861963	0.00168754	0.000360643	0.00102409			0.0219183	0.0187447		0.000861963	0.00102409
NM_009012	1293	165	136	150.5	218	180	199		349	834	591.5	429	477	453		0.0222492	0.0192498	0.0207495	0.0362006	0.0169891	0.0265949		0.000730693	0.00108676	0.000908728	0.00110359	0.000688106	0.000895849			0.0207495	0.0265949		0.000908728	0.000895849
NM_001110205	490	182	147	164.5	185	404	294.5		275	773	524	229	678	453.5		0.0245415	0.0208068	0.0226742	0.0307207	0.0381312	0.0344259		0.000575761	0.00100728	0.000791518	0.000589096	0.000978063	0.00078358			0.0226742	0.0344259		0.000791518	0.00078358
NM_001110204	490	182	147	164.5	185	404	294.5		275	773	524	229	678	453.5		0.0245415	0.0208068	0.0226742	0.0307207	0.0381312	0.0344259		0.000575761	0.00100728	0.000791518	0.000589096	0.000978063	0.00078358			0.0226742	0.0344259		0.000791518	0.00078358
NM_007394	490	182	147	164.5	185	404	294.5		275	773	524	229	678	453.5		0.0245415	0.0208068	0.0226742	0.0307207	0.0381312	0.0344259		0.000575761	0.00100728	0.000791518	0.000589096	0.000978063	0.00078358			0.0226742	0.0344259		0.000791518	0.00078358
NM_010048	530	109	121	115	99	180	139.5		344	557	450.5	507	401	454		0.014698	0.0171267	0.0159123	0.0164397	0.0169891	0.0167144		0.000720224	0.000725811	0.000723018	0.00130424	0.000578471	0.000941357			0.0159123	0.0167144		0.000723018	0.000941357
NM_010248	647	134	136	135	104	240	172		286	879	582.5	271	638	454.5		0.018069	0.0192498	0.0186594	0.01727	0.0226522	0.0199611		0.000598791	0.0011454	0.000872096	0.00069714	0.00092036	0.00080875			0.0186594	0.0199611		0.000872096	0.00080875
NM_180662	1120	120	146	133	119	178	148.5		455	897	676	528	381	454.5		0.0161812	0.0206653	0.0184232	0.0197609	0.0168004	0.0182806		0.000952622	0.00116886	0.00106074	0.00135827	0.000549619	0.000953943			0.0184232	0.0182806		0.00106074	0.000953943
NM_175663	108	1596	4309	2952.5	1750	6493	4121.5		307	596	451.5	377	533	455		0.21521	0.609908	0.412559	0.290601	0.612836	0.451719		0.000642758	0.000776631	0.000709695	0.000969822	0.00076889	0.000869356			0.412559	0.451719		0.000709695	0.000869356
NM_172574	183	261	301	281	214	275	244.5		395	776	585.5	379	531	455		0.0351942	0.0426044	0.0388993	0.0355364	0.0259556	0.030746		0.000827002	0.00101118	0.000919093	0.000974967	0.000766005	0.000870486			0.0388993	0.030746		0.000919093	0.000870486
NM_021549	503	120	157	138.5	120	170	145		499	740	619.5	512	399	455.5		0.0161812	0.0222222	0.0192017	0.0199269	0.0160453	0.0179861		0.00104474	0.000964274	0.00100451	0.00131711	0.000575586	0.000946346			0.0192017	0.0179861		0.00100451	0.000946346
NM_153585	725	89	114	101.5	130	123	126.5		401	911	656	420	491	455.5		0.0120011	0.0161359	0.0140685	0.0215875	0.0116092	0.0165984		0.000839564	0.0011871	0.00101333	0.00108044	0.000708302	0.00089437			0.0140685	0.0165984		0.00101333	0.00089437
NM_001162477	646	134	135	134.5	104	236	170		272	877	574.5	271	641	456		0.018069	0.0191083	0.0185887	0.01727	0.0222747	0.0197723		0.00056948	0.00114279	0.000856137	0.00069714	0.000924688	0.000810914			0.0185887	0.0197723		0.000856137	0.000810914
NM_026295	941	105	114	109.5	132	121	126.5		510	970	740	441	471	456		0.0141586	0.0161359	0.0151472	0.0219196	0.0114205	0.0166701		0.00106777	0.00126398	0.00116588	0.00113446	0.000679451	0.000906956			0.0151472	0.0166701		0.00116588	0.000906956
NM_198831	192	89	140	114.5	111	214	162.5		455	308	381.5	582	331	456.5		0.0120011	0.019816	0.0159085	0.0184324	0.0201982	0.0193153		0.000952622	0.000401346	0.000676984	0.00149718	0.000477491	0.000987335			0.0159085	0.0193153		0.000676984	0.000987335
NM_175400	373	131	113	122	132	192	162		487	420	453.5	518	396	457		0.0176645	0.0159943	0.0168294	0.0219196	0.0181218	0.0200207		0.00101962	0.00054729	0.000783455	0.00133254	0.000571258	0.000951899			0.0168294	0.0200207		0.000783455	0.000951899
NM_011956	256	122	187	154.5	102	269	185.5		357	651	504	433	481	457		0.0164509	0.0264685	0.0214597	0.0169379	0.0253893	0.0211636		0.000747442	0.0008483	0.000797871	0.00111388	0.000693876	0.000903879			0.0214597	0.0211636		0.000797871	0.000903879
NM_011358	202	248	435	341.5	360	958	659		244	960	602	322	592	457		0.0334412	0.0615711	0.0475062	0.0597808	0.09042	0.0751004		0.000510857	0.00125095	0.000880903	0.000828336	0.000854002	0.000841169			0.0475062	0.0751004		0.000880903	0.000841169
NM_001042501	226	440	267	353.5	107	99	103		3024	1281	2152.5	590	324	457		0.0593312	0.0377919	0.0485616	0.0177682	0.00934403	0.0135561		0.00633127	0.00166924	0.00400025	0.00151776	0.000467393	0.000992576			0.0485616	0.0135561		0.00400025	0.000992576
NM_019781	357	82	143	112.5	102	233	167.5		280	415	347.5	571	344	457.5		0.0110572	0.0202406	0.0156489	0.0169379	0.0219915	0.0194647		0.000586229	0.000540775	0.000563502	0.00146888	0.000496244	0.000982563			0.0156489	0.0194647		0.000563502	0.000982563
NM_001163333	619	526	549	537.5	436	679	557.5		565	928	746.5	381	534	457.5		0.0709277	0.077707	0.0743174	0.0724012	0.0640868	0.068244		0.00118293	0.00120925	0.00119609	0.000980112	0.000770333	0.000875222			0.0743174	0.068244		0.00119609	0.000875222
NM_001163332	619	526	549	537.5	436	679	557.5		565	928	746.5	381	534	457.5		0.0709277	0.077707	0.0743174	0.0724012	0.0640868	0.068244		0.00118293	0.00120925	0.00119609	0.000980112	0.000770333	0.000875222			0.0743174	0.068244		0.00119609	0.000875222
NM_030249	619	526	549	537.5	436	679	557.5		565	928	746.5	381	534	457.5		0.0709277	0.077707	0.0743174	0.0724012	0.0640868	0.068244		0.00118293	0.00120925	0.00119609	0.000980112	0.000770333	0.000875222			0.0743174	0.068244		0.00119609	0.000875222
NM_023403	205	257	191	224	271	322	296.5		366	383	374.5	562	355	458.5		0.0346548	0.0270347	0.0308447	0.0450017	0.0303917	0.0376967		0.000766285	0.000499077	0.000632681	0.00144573	0.000512113	0.000978921			0.0308447	0.0376967		0.000632681	0.000978921
NM_025388	148	84	220	152	99	300	199.5		365	542	453.5	368	549	458.5		0.0113269	0.0311394	0.0212331	0.0164397	0.0283152	0.0223775		0.000764191	0.000706265	0.000735228	0.00094667	0.000791971	0.000869321			0.0212331	0.0223775		0.000735228	0.000869321
NM_001045513	1247	145	137	141	140	178	159		225	983	604	187	730	458.5		0.0195523	0.0193914	0.0194718	0.0232481	0.0168004	0.0200242		0.000471077	0.00128092	0.000875999	0.000481052	0.00105308	0.000767064			0.0194718	0.0200242		0.000875999	0.000767064
NM_211357	397	142	153	147.5	142	189	165.5		523	1025	774	404	513	458.5		0.0191478	0.0216561	0.0204019	0.0235802	0.0178386	0.0207094		0.00109499	0.00133565	0.00121532	0.00103928	0.000740039	0.000889659			0.0204019	0.0207094		0.00121532	0.000889659
NM_007456	404	212	299	255.5	307	331	319		280	1155	717.5	269	649	459		0.0285868	0.0423213	0.0354541	0.0509797	0.0312412	0.0411104		0.000586229	0.00150505	0.00104564	0.000691995	0.000936228	0.000814112			0.0354541	0.0411104		0.00104564	0.000814112
NM_001122667	1072	176	174	175	117	255	186		274	1405	839.5	219	699	459		0.0237325	0.0246285	0.0241805	0.0194288	0.024068	0.0217484		0.000573667	0.00183082	0.00120224	0.000563372	0.00100836	0.000785864			0.0241805	0.0217484		0.00120224	0.000785864
NM_172627	358	138	147	142.5	122	247	184.5		280	868	574	286	633	459.5		0.0186084	0.0208068	0.0197076	0.0202591	0.0233129	0.021786		0.000586229	0.00113107	0.000858648	0.000735727	0.000913147	0.000824437			0.0197076	0.021786		0.000858648	0.000824437
NM_011489	767	171	271	221	251	247	249		335	901	618	356	563	459.5		0.0230583	0.0383581	0.0307082	0.0416805	0.0233129	0.0324967		0.000701381	0.00117407	0.000937725	0.0009158	0.000812167	0.000863984			0.0307082	0.0324967		0.000937725	0.000863984
NM_001113563	767	171	271	221	251	247	249		335	901	618	356	563	459.5		0.0230583	0.0383581	0.0307082	0.0416805	0.0233129	0.0324967		0.000701381	0.00117407	0.000937725	0.0009158	0.000812167	0.000863984			0.0307082	0.0324967		0.000937725	0.000863984
NM_024464	235	96	104	100	57	182	119.5		431	461	446	444	477	460.5		0.012945	0.0147205	0.0138327	0.00946529	0.0171779	0.0133216		0.000902374	0.000600716	0.000751545	0.00114218	0.000688106	0.000915142			0.0138327	0.0133216		0.000751545	0.000915142
NM_019640	252	223	267	245	321	429	375		158	805	481.5	264	657	460.5		0.0300701	0.0377919	0.033931	0.0533045	0.0404908	0.0468977		0.000330801	0.00104897	0.000689887	0.000679133	0.000947769	0.000813451			0.033931	0.0468977		0.000689887	0.000813451
NM_001111058	384	147	69	108	154	116	135		524	569	546.5	545	376	460.5		0.019822	0.00976645	0.0147942	0.0255729	0.0109486	0.0182607		0.00109709	0.000741448	0.000919267	0.001402	0.000542407	0.000972202			0.0147942	0.0182607		0.000919267	0.000972202
NM_001029895	490	149	150	149.5	141	223	182		406	727	566.5	415	506	460.5		0.0200917	0.0212314	0.0206616	0.0234141	0.0210477	0.0222309		0.000850032	0.000947334	0.000898683	0.00106758	0.000729941	0.000898758			0.0206616	0.0222309		0.000898683	0.000898758
NM_001146043	722	89	111	100	107	122	114.5		328	573	450.5	527	395	461		0.0120011	0.0157113	0.0138562	0.0177682	0.0115149	0.0146415		0.000686725	0.000746661	0.000716693	0.00135569	0.000569815	0.000962754			0.0138562	0.0146415		0.000716693	0.000962754
NM_026904	166	98	118	108	75	249	162		297	609	453	282	640	461		0.0132147	0.0167021	0.0149584	0.0124543	0.0235017	0.017978		0.000621822	0.000793571	0.000707696	0.000725437	0.000923245	0.000824341			0.0149584	0.017978		0.000707696	0.000824341
NM_198110	558	164	199	181.5	158	183	170.5		356	1195	775.5	462	461	461.5		0.0221143	0.028167	0.0251407	0.0262371	0.0172723	0.0217547		0.000745348	0.00155717	0.00115126	0.00118848	0.000665025	0.000926754			0.0251407	0.0217547		0.00115126	0.000926754
NM_001168600	558	164	199	181.5	158	183	170.5		356	1195	775.5	462	461	461.5		0.0221143	0.028167	0.0251407	0.0262371	0.0172723	0.0217547		0.000745348	0.00155717	0.00115126	0.00118848	0.000665025	0.000926754			0.0251407	0.0217547		0.00115126	0.000926754
NM_026097	316	139	120	129.5	66	73	69.5		824	1156	990	446	477	461.5		0.0187433	0.0169851	0.0178642	0.0109598	0.00689004	0.00892493		0.00172519	0.00150635	0.00161577	0.00114732	0.000688106	0.000917715			0.0178642	0.00892493		0.00161577	0.000917715
NM_026780	223	219	245	232	211	389	300		537	513	525	522	402	462		0.0295307	0.034678	0.0321044	0.0350382	0.0367154	0.0358768		0.0011243	0.000668476	0.00089639	0.00134283	0.000579913	0.000961372			0.0321044	0.0358768		0.00089639	0.000961372
NM_022432	370	123	229	176	152	270	211		472	775	623.5	539	385	462		0.0165858	0.0324133	0.0244995	0.0252408	0.0254837	0.0253623		0.000988215	0.00100988	0.000999048	0.00138656	0.00055539	0.000970976			0.0244995	0.0253623		0.000999048	0.000970976
NM_007764	284	136	146	141	170	347	258.5		124	505	314.5	142	783	462.5		0.0183387	0.0206653	0.019502	0.0282298	0.0327513	0.0304906		0.000259616	0.000658052	0.000458834	0.000365291	0.00112953	0.000747412			0.019502	0.0304906		0.000458834	0.000747412
NM_011946	600	186	104	145	104	145	124.5		333	942	637.5	244	681	462.5		0.0250809	0.0147205	0.0199007	0.01727	0.0136857	0.0154779		0.000697194	0.00122749	0.000962344	0.000627683	0.000982391	0.000805037			0.0199007	0.0154779		0.000962344	0.000805037
NM_010479	622	756	371	563.5	246	289	267.5		2169	1155	1662	658	267	462.5		0.101942	0.0525124	0.0772271	0.0408502	0.027277	0.0340636		0.00454118	0.00150505	0.00302312	0.00169269	0.000385166	0.00103893			0.0772271	0.0340636		0.00302312	0.00103893
NM_183138	1649	83	118	100.5	85	120	102.5		175	1501	838	187	740	463.5		0.011192	0.0167021	0.013947	0.0141149	0.0113261	0.0127205		0.000366393	0.00195591	0.00116115	0.000481052	0.0010675	0.000774277			0.013947	0.0127205		0.00116115	0.000774277
NM_152817	828	134	173	153.5	150	147	148.5		393	935	664	381	547	464		0.018069	0.0244869	0.021278	0.0249087	0.0138745	0.0193916		0.000822814	0.00121837	0.00102059	0.000980112	0.000789086	0.000884599			0.021278	0.0193916		0.00102059	0.000884599
NM_010629	753	128	162	145	88	133	110.5		272	1139	705.5	271	657	464		0.01726	0.0229299	0.020095	0.0146131	0.0125531	0.0135831		0.00056948	0.0014842	0.00102684	0.00069714	0.000947769	0.000822455			0.020095	0.0135831		0.00102684	0.000822455
NM_001033305	109	128	267	197.5	142	248	195		409	600	504.5	464	465	464.5		0.01726	0.0377919	0.027526	0.0235802	0.0234073	0.0234937		0.000856313	0.000781844	0.000819078	0.00119363	0.000670795	0.000932211			0.027526	0.0234937		0.000819078	0.000932211
NM_001109750	527	107	122	114.5	99	179	139		340	579	459.5	517	413	465		0.0144283	0.0172682	0.0158482	0.0164397	0.0168948	0.0166672		0.00071185	0.000754479	0.000733164	0.00132997	0.000595782	0.000962875			0.0158482	0.0166672		0.000733164	0.000962875
NM_001164411	553	149	164	156.5	88	289	188.5		245	853	549	146	784	465		0.0200917	0.023213	0.0216524	0.0146131	0.027277	0.0209451		0.00051295	0.00111152	0.000812236	0.000375581	0.00113098	0.000753278			0.0216524	0.0209451		0.000812236	0.000753278
NM_025564	129	162	79	120.5	179	179	179		447	177	312	592	339	465.5		0.0218447	0.0111819	0.0165133	0.0297243	0.0168948	0.0233096		0.000935873	0.000230644	0.000583258	0.0015229	0.000489031	0.00100597			0.0165133	0.0233096		0.000583258	0.00100597
NM_027652	379	116	113	114.5	131	123	127		466	700	583	545	389	467		0.0156419	0.0159943	0.0158181	0.0217536	0.0116092	0.0166814		0.000975653	0.000912151	0.000943902	0.001402	0.00056116	0.000981579			0.0158181	0.0166814		0.000943902	0.000981579
NM_025811	706	118	85	101.5	97	172	134.5		386	780	583	365	570	467.5		0.0159115	0.0120311	0.0139713	0.0161076	0.0162341	0.0161708		0.000808159	0.0010164	0.000912278	0.000938953	0.000822265	0.000880609			0.0139713	0.0161708		0.000912278	0.000880609
NM_007382	402	164	255	209.5	185	224	204.5		450	1004	727	531	404	467.5		0.0221143	0.0360934	0.0291039	0.0307207	0.021142	0.0259314		0.000942154	0.00130828	0.00112522	0.00136598	0.000582799	0.000974391			0.0291039	0.0259314		0.00112522	0.000974391
NM_001164533	347	117	139	128	101	134	117.5		591	910	750.5	555	380	467.5		0.0157767	0.0196745	0.0177256	0.0167718	0.0126475	0.0147097		0.00123736	0.0011858	0.00121158	0.00142772	0.000548177	0.00098795			0.0177256	0.0147097		0.00121158	0.00098795
NM_009281	618	148	135	141.5	159	328	243.5		335	513	424	399	537	468		0.0199569	0.0191083	0.0195326	0.0264032	0.030958	0.0286806		0.000701381	0.000668476	0.000684929	0.00102642	0.00077466	0.000900539			0.0195326	0.0286806		0.000684929	0.000900539
NM_001165956	932	92	112	102	97	184	140.5		106	1083	594.5	183	753	468		0.0124056	0.0158528	0.0141292	0.0161076	0.0173667	0.0167371		0.00022193	0.00141123	0.000816579	0.000470763	0.00108626	0.000778509			0.0141292	0.0167371		0.000816579	0.000778509
NM_027879	560	165	153	159	202	284	243		195	995	595	209	727	468		0.0222492	0.0216561	0.0219526	0.0335437	0.0268051	0.0301744		0.000408267	0.00129656	0.000852412	0.000537647	0.00104875	0.000793198			0.0219526	0.0301744		0.000852412	0.000793198
NM_172507	88	186	122	154	217	222	219.5		216	720	468	417	520	468.5		0.0250809	0.0172682	0.0211746	0.0360345	0.0209533	0.0284939		0.000452234	0.000938212	0.000695223	0.00107272	0.000750137	0.000911429			0.0211746	0.0284939		0.000695223	0.000911429
NM_013799	497	150	155	152.5	140	232	186		392	737	564.5	417	520	468.5		0.0202265	0.0219391	0.0210828	0.0232481	0.0218971	0.0225726		0.000820721	0.000960364	0.000890543	0.00107272	0.000750137	0.000911429			0.0210828	0.0225726		0.000890543	0.000911429
NM_153421	962	91	114	102.5	100	184	142		106	1082	594	181	756	468.5		0.0122708	0.0161359	0.0142033	0.0166058	0.0173667	0.0169862		0.00022193	0.00140992	0.000815927	0.000465618	0.00109058	0.0007781			0.0142033	0.0169862		0.000815927	0.0007781
NM_153530	851	77	126	101.5	62	98	80		463	1059	761	466	471	468.5		0.010383	0.0178344	0.0141087	0.0102956	0.00924965	0.00977261		0.000969372	0.00137995	0.00117466	0.00119877	0.000679451	0.000939112			0.0141087	0.00977261		0.00117466	0.000939112
NM_001164414	623	161	170	165.5	88	333	210.5		253	817	535	150	788	469		0.0217098	0.0240623	0.022886	0.0146131	0.0314299	0.0230215		0.0005297	0.00106461	0.000797155	0.000385871	0.00113675	0.000761308			0.022886	0.0230215		0.000797155	0.000761308
NM_001042709	684	182	198	190	169	192	180.5		414	759	586.5	628	310	469		0.0245415	0.0280255	0.0262835	0.0280638	0.0181218	0.0230928		0.000866782	0.000989032	0.000927907	0.00161551	0.000447197	0.00103135			0.0262835	0.0230928		0.000927907	0.00103135
NM_181403	333	150	213	181.5	96	413	254.5		346	831	588.5	272	666	469		0.0202265	0.0301486	0.0251876	0.0159415	0.0389807	0.0274611		0.000724412	0.00108285	0.000903632	0.000699713	0.000960752	0.000830232			0.0251876	0.0274611		0.000903632	0.000830232
NM_021501	488	136	164	150	153	156	154.5		480	643	561.5	543	396	469.5		0.0183387	0.023213	0.0207759	0.0254068	0.0147239	0.0200654		0.00100496	0.000837876	0.00092142	0.00139685	0.000571258	0.000984055			0.0207759	0.0200654		0.00092142	0.000984055
NM_001042484	118	127	187	157	99	275	187		207	522	364.5	236	704	470		0.0171251	0.0264685	0.0217968	0.0164397	0.0259556	0.0211977		0.000433391	0.000680204	0.000556797	0.000607104	0.00101557	0.000811337			0.0217968	0.0211977		0.000556797	0.000811337
NM_020585	118	127	187	157	99	275	187		207	522	364.5	236	704	470		0.0171251	0.0264685	0.0217968	0.0164397	0.0259556	0.0211977		0.000433391	0.000680204	0.000556797	0.000607104	0.00101557	0.000811337			0.0217968	0.0211977		0.000556797	0.000811337
NM_024220	101	202	377	289.5	212	322	267		481	805	643	507	434	470.5		0.0272384	0.0533616	0.0403	0.0352043	0.0303917	0.032798		0.00100706	0.00104897	0.00102802	0.00130424	0.000626076	0.00096516			0.0403	0.032798		0.00102802	0.00096516
NM_021439	333	279	670	474.5	289	743	516		153	1439	796	252	690	471		0.0376214	0.0948337	0.0662275	0.0479907	0.0701274	0.0590591		0.000320332	0.00187512	0.00109773	0.000648263	0.000995374	0.000821818			0.0662275	0.0590591		0.00109773	0.000821818
NM_019782	729	104	123	113.5	112	201	156.5		494	579	536.5	491	452	471.5		0.0140237	0.0174098	0.0157167	0.0185985	0.0189712	0.0187848		0.00103428	0.000754479	0.000894377	0.00126308	0.000652042	0.000957563			0.0157167	0.0187848		0.000894377	0.000957563
NM_029272	205	105	241	173	100	256	178		534	553	543.5	645	298	471.5		0.0141586	0.0341118	0.0241352	0.0166058	0.0241623	0.0203841		0.00111802	0.000720599	0.000919311	0.00165925	0.000429886	0.00104457			0.0241352	0.0203841		0.000919311	0.00104457
NM_175310	1427	90	123	106.5	131	185	158		177	826	501.5	165	779	472		0.0121359	0.0174098	0.0147728	0.0217536	0.0174611	0.0196073		0.000370581	0.00107634	0.000723459	0.000424458	0.00112376	0.00077411			0.0147728	0.0196073		0.000723459	0.00077411
NM_023665	279	137	308	222.5	174	683	428.5		361	757	559	374	570	472		0.0184736	0.0435952	0.0310344	0.0288941	0.0644644	0.0466792		0.000755817	0.000986426	0.000871121	0.000962105	0.000822265	0.000892185			0.0310344	0.0466792		0.000871121	0.000892185
NM_028464	366	161	189	175	168	161	164.5		585	651	618	639	305	472		0.0217098	0.0267516	0.0242307	0.0278977	0.0151958	0.0215468		0.0012248	0.0008483	0.00103655	0.00164381	0.000439984	0.0010419			0.0242307	0.0215468		0.00103655	0.0010419
NM_001165954	974	93	119	106	103	188	145.5		106	1087	596.5	183	762	472.5		0.0125405	0.0168436	0.014692	0.017104	0.0177442	0.0174241		0.00022193	0.00141644	0.000819185	0.000470763	0.00109924	0.000785001			0.014692	0.0174241		0.000819185	0.000785001
NM_001172157	865	77	125	101	62	98	80		463	1055	759	475	470	472.5		0.010383	0.0176929	0.0140379	0.0102956	0.00924965	0.00977261		0.000969372	0.00137474	0.00117206	0.00122192	0.000678008	0.000949966			0.0140379	0.00977261		0.00117206	0.000949966
NM_008303	83	76	258	167	110	467	288.5		647	377	512	553	393	473		0.0102481	0.036518	0.0233831	0.0182664	0.0440774	0.0311719		0.00135461	0.000491258	0.000922933	0.00142258	0.00056693	0.000994754			0.0233831	0.0311719		0.000922933	0.000994754
NM_001081350	1146	130	146	138	144	116	130		157	940	548.5	226	720	473		0.0175297	0.0206653	0.0190975	0.0239123	0.0109486	0.0174304		0.000328707	0.00122489	0.000776798	0.000581379	0.00103865	0.000810015			0.0190975	0.0174304		0.000776798	0.000810015
NM_153554	774	92	156	124	134	115	124.5		560	1014	787	520	427	473.5		0.0124056	0.0220807	0.0172431	0.0222517	0.0108542	0.016553		0.00117246	0.00132132	0.00124689	0.00133769	0.000615978	0.000976832			0.0172431	0.016553		0.00124689	0.000976832
NM_026735	197	230	221	225.5	196	562	379		155	683	419	133	815	474		0.031014	0.031281	0.0311475	0.0325473	0.0530439	0.0427956		0.00032452	0.000889999	0.000607259	0.000342139	0.00117569	0.000758917			0.0311475	0.0427956		0.000607259	0.000758917
NM_010362	221	212	200	206	172	309	240.5		505	592	548.5	436	513	474.5		0.0285868	0.0283086	0.0284477	0.0285619	0.0291647	0.0288633		0.00105731	0.000771419	0.000914362	0.0011216	0.000740039	0.000930818			0.0284477	0.0288633		0.000914362	0.000930818
NM_001146050	223	123	110	116.5	157	154	155.5		646	495	570.5	699	251	475		0.0165858	0.0155697	0.0160777	0.0260711	0.0145352	0.0203031		0.00135251	0.000645021	0.000998768	0.00179816	0.000362085	0.00108012			0.0160777	0.0203031		0.000998768	0.00108012
NM_001146053	223	123	110	116.5	157	154	155.5		646	495	570.5	699	251	475		0.0165858	0.0155697	0.0160777	0.0260711	0.0145352	0.0203031		0.00135251	0.000645021	0.000998768	0.00179816	0.000362085	0.00108012			0.0160777	0.0203031		0.000998768	0.00108012
NM_001146052	223	123	110	116.5	157	154	155.5		646	495	570.5	699	251	475		0.0165858	0.0155697	0.0160777	0.0260711	0.0145352	0.0203031		0.00135251	0.000645021	0.000998768	0.00179816	0.000362085	0.00108012			0.0160777	0.0203031		0.000998768	0.00108012
NM_001146049	223	123	110	116.5	157	154	155.5		646	495	570.5	699	251	475		0.0165858	0.0155697	0.0160777	0.0260711	0.0145352	0.0203031		0.00135251	0.000645021	0.000998768	0.00179816	0.000362085	0.00108012			0.0160777	0.0203031		0.000998768	0.00108012
NM_026660	437	152	175	163.5	167	253	210		640	675	657.5	514	436	475		0.0204962	0.02477	0.0226331	0.0277317	0.0238792	0.0258054		0.00133995	0.000879574	0.00110976	0.00132225	0.000628961	0.000975606			0.0226331	0.0258054		0.00110976	0.000975606
NM_172618	593	202	149	175.5	124	195	159.5		676	1019	847.5	332	618	475		0.0272384	0.0210899	0.0241641	0.0205912	0.0184049	0.019498		0.00141532	0.00132783	0.00137158	0.000854061	0.000891509	0.000872785			0.0241641	0.019498		0.00137158	0.000872785
NM_144525	668	191	352	271.5	211	256	233.5		529	1495	1012	432	518	475		0.0257551	0.0498231	0.0377891	0.0350382	0.0241623	0.0296003		0.00110755	0.00194809	0.00152782	0.00111131	0.000747252	0.00092928			0.0377891	0.0296003		0.00152782	0.00092928
NM_178684	223	236	383	309.5	225	786	505.5		175	1230	702.5	193	758	475.5		0.0318231	0.0542109	0.043017	0.037363	0.0741859	0.0557745		0.000366393	0.00160278	0.000984586	0.000496487	0.00109347	0.000794978			0.043017	0.0557745		0.000984586	0.000794978
NM_019946	136	68	157	112.5	86	184	135		352	555	453.5	435	517	476		0.00916936	0.0222222	0.0156958	0.014281	0.0173667	0.0158238		0.000736974	0.000723205	0.000730089	0.00111903	0.000745809	0.000932417			0.0156958	0.0158238		0.000730089	0.000932417
NM_025313	149	302	670	486	301	1021	661		368	760	564	441	513	477		0.0407228	0.0948337	0.0677782	0.0499834	0.0963662	0.0731748		0.000770472	0.000990335	0.000880404	0.00113446	0.000740039	0.00093725			0.0677782	0.0731748		0.000880404	0.00093725
NM_172769	280	100	160	130	73	175	124		375	958	666.5	241	713	477		0.0134844	0.0226469	0.0180656	0.0121222	0.0165172	0.0143197		0.000785128	0.00124834	0.00101674	0.000619966	0.00102855	0.000824259			0.0180656	0.0143197		0.00101674	0.000824259
NM_183031	338	168	241	204.5	80	172	126		564	1391	977.5	256	698	477		0.0226537	0.0341118	0.0283828	0.0132846	0.0162341	0.0147593		0.00118083	0.00181257	0.0014967	0.000658553	0.00100691	0.000832734			0.0283828	0.0147593		0.0014967	0.000832734
NM_019542	324	116	126	121	126	179	152.5		435	601	518	553	402	477.5		0.0156419	0.0178344	0.0167381	0.0209233	0.0168948	0.018909		0.000910749	0.000783147	0.000846948	0.00142258	0.000579913	0.00100125			0.0167381	0.018909		0.000846948	0.00100125
NM_001172097	285	128	90	109	86	124	105		395	772	583.5	265	691	478		0.01726	0.0127389	0.0149994	0.014281	0.0117036	0.0129923		0.000827002	0.00100597	0.000916487	0.000681705	0.000996816	0.000839261			0.0149994	0.0129923		0.000916487	0.000839261
NM_009594	1104	95	113	104	124	80	102		361	1145	753	506	450	478		0.0128101	0.0159943	0.0144022	0.0205912	0.00755073	0.0140709		0.000755817	0.00149202	0.00112392	0.00130167	0.000649157	0.000975414			0.0144022	0.0140709		0.00112392	0.000975414
NM_178371	530	196	191	193.5	161	197	179		649	890	769.5	555	401	478		0.0264293	0.0270347	0.026732	0.0267353	0.0185937	0.0226645		0.0013588	0.00115973	0.00125926	0.00142772	0.000578471	0.0010031			0.026732	0.0226645		0.00125926	0.0010031
NM_001252333	408	154	161	157.5	158	188	173		566	549	557.5	549	409	479		0.0207659	0.0227884	0.0217772	0.0262371	0.0177442	0.0219907		0.00118502	0.000715387	0.000950203	0.00141229	0.000590011	0.00100115			0.0217772	0.0219907		0.000950203	0.00100115
NM_019783	720	112	123	117.5	118	206	162		519	598	558.5	494	464	479		0.0151025	0.0174098	0.0162561	0.0195948	0.0194431	0.019519		0.00108662	0.000779237	0.000932927	0.0012708	0.000669353	0.000970077			0.0162561	0.019519		0.000932927	0.000970077
NM_027060	593	202	149	175.5	124	195	159.5		682	1024	853	332	626	479		0.0272384	0.0210899	0.0241641	0.0205912	0.0184049	0.019498		0.00142789	0.00133435	0.00138112	0.000854061	0.000903049	0.000878555			0.0241641	0.019498		0.00138112	0.000878555
NM_013706	55	807	1758	1282.5	715	2623	1669		678	422	550	754	205	479.5		0.108819	0.248832	0.178826	0.118731	0.24757	0.18315		0.00141951	0.000549897	0.000984704	0.00193964	0.000295727	0.00111769			0.178826	0.18315		0.000984704	0.00111769
NM_007828	429	103	122	112.5	139	209	174		477	688	582.5	555	404	479.5		0.0138889	0.0172682	0.0155786	0.023082	0.0197263	0.0214042		0.000998683	0.000896514	0.000947598	0.00142772	0.000582799	0.00100526			0.0155786	0.0214042		0.000947598	0.00100526
NM_001190474	429	103	122	112.5	139	209	174		477	688	582.5	555	404	479.5		0.0138889	0.0172682	0.0155786	0.023082	0.0197263	0.0214042		0.000998683	0.000896514	0.000947598	0.00142772	0.000582799	0.00100526			0.0155786	0.0214042		0.000947598	0.00100526
NM_001190473	429	103	122	112.5	139	209	174		477	688	582.5	555	404	479.5		0.0138889	0.0172682	0.0155786	0.023082	0.0197263	0.0214042		0.000998683	0.000896514	0.000947598	0.00142772	0.000582799	0.00100526			0.0155786	0.0214042		0.000947598	0.00100526
NM_181452	170	75	154	114.5	66	151	108.5		450	733	591.5	401	559	480		0.0101133	0.0217976	0.0159554	0.0109598	0.014252	0.0126059		0.000942154	0.000955152	0.000948653	0.00103156	0.000806397	0.000918979			0.0159554	0.0126059		0.000948653	0.000918979
NM_029951	203	136	122	129	141	168	154.5		434	722	578	350	611	480.5		0.0183387	0.0172682	0.0178035	0.0234141	0.0158565	0.0196353		0.000908655	0.000940818	0.000924737	0.000900366	0.000881411	0.000890888			0.0178035	0.0196353		0.000924737	0.000890888
NM_001042708	697	190	204	197	170	193	181.5		416	776	596	642	319	480.5		0.0256203	0.0288747	0.0272475	0.0282298	0.0182161	0.023223		0.000870969	0.00101118	0.000941077	0.00165153	0.00046018	0.00105585			0.0272475	0.023223		0.000941077	0.00105585
NM_011155	480	235	193	214	216	235	225.5		577	822	699.5	614	348	481		0.0316882	0.0273178	0.029503	0.0358685	0.0221803	0.0290244		0.00120805	0.00107113	0.00113959	0.0015795	0.000502015	0.00104076			0.029503	0.0290244		0.00113959	0.00104076
NM_009201	536	189	216	202.5	133	158	145.5		515	922	718.5	512	450	481		0.0254854	0.0305732	0.0280293	0.0220857	0.0149127	0.0184992		0.00107824	0.00120143	0.00113984	0.00131711	0.000649157	0.000983131			0.0280293	0.0184992		0.00113984	0.000983131
NM_053204	1101	134	104	119	213	210	211.5		266	685	475.5	312	651	481.5		0.018069	0.0147205	0.0163947	0.0353703	0.0198207	0.0275955		0.000556918	0.000892605	0.000724761	0.000802612	0.000939113	0.000870862			0.0163947	0.0275955		0.000724761	0.000870862
NM_033144	411	153	161	157	155	187	171		565	546	555.5	554	409	481.5		0.0206311	0.0227884	0.0217097	0.025739	0.0176498	0.0216944		0.00118293	0.000711478	0.000947202	0.00142515	0.000590011	0.00100758			0.0217097	0.0216944		0.000947202	0.00100758
NM_030749	446	185	128	156.5	165	221	193		739	476	607.5	641	322	481.5		0.0249461	0.0181175	0.0215318	0.0273995	0.0208589	0.0241292		0.00154723	0.000620263	0.00108374	0.00164896	0.000464508	0.00105673			0.0215318	0.0241292		0.00108374	0.00105673
NM_001205181	299	121	166	143.5	113	165	139		353	1014	683.5	557	406	481.5		0.0163161	0.0234961	0.0199061	0.0187645	0.0155734	0.017169		0.000739067	0.00132132	0.00103019	0.00143287	0.000585684	0.00100928			0.0199061	0.017169		0.00103019	0.00100928
NM_001029876	1505	118	138	128	137	93	115		477	1603	1040	520	443	481.5		0.0159115	0.0195329	0.0177222	0.0227499	0.00877773	0.0157638		0.000998683	0.00208883	0.00154375	0.00133769	0.000639059	0.000988372			0.0177222	0.0157638		0.00154375	0.000988372
NM_009537	395	284	201	242.5	308	433	370.5		326	816	571	343	621	482		0.0382956	0.0284501	0.0333728	0.0511458	0.0408683	0.0460071		0.000682538	0.00106331	0.000872923	0.000882358	0.000895836	0.000889097			0.0333728	0.0460071		0.000872923	0.000889097
NM_010591	315	396	725	560.5	261	732	496.5		587	1420	1003.5	557	407	482		0.0533981	0.102619	0.0780083	0.0433411	0.0690892	0.0562151		0.00122899	0.00185036	0.00153968	0.00143287	0.000587126	0.00101			0.0780083	0.0562151		0.00153968	0.00101
NM_001164412	620	162	176	169	94	334	214		253	859	556	150	815	482.5		0.0218447	0.0249115	0.0233781	0.0156094	0.0315243	0.0235669		0.0005297	0.00111934	0.00082452	0.000385871	0.00117569	0.000780783			0.0233781	0.0235669		0.00082452	0.000780783
NM_001252089	369	266	371	318.5	294	594	444		403	698	550.5	424	542	483		0.0358684	0.0525124	0.0441904	0.048821	0.0560642	0.0524426		0.000843751	0.000909545	0.000876648	0.00109073	0.000781873	0.000936301			0.0441904	0.0524426		0.000876648	0.000936301
NM_009033	369	266	371	318.5	294	594	444		403	698	550.5	424	542	483		0.0358684	0.0525124	0.0441904	0.048821	0.0560642	0.0524426		0.000843751	0.000909545	0.000876648	0.00109073	0.000781873	0.000936301			0.0441904	0.0524426		0.000876648	0.000936301
NM_027179	274	363	687	525	301	841	571		302	1048	675	297	669	483		0.0489482	0.0972399	0.0730941	0.0499834	0.0793771	0.0646802		0.00063229	0.00136562	0.000998955	0.000764024	0.00096508	0.000864552			0.0730941	0.0646802		0.000998955	0.000864552
NM_008372	440	222	150	186	130	213	171.5		563	830	696.5	296	672	484		0.0299353	0.0212314	0.0255833	0.0215875	0.0201038	0.0208457		0.00117874	0.00108155	0.00113014	0.000761452	0.000969407	0.00086543			0.0255833	0.0208457		0.00113014	0.00086543
NM_199447	1276	125	248	186.5	138	135	136.5		627	1620	1123.5	538	430	484		0.0168554	0.0351026	0.025979	0.022916	0.0127419	0.0178289		0.00131273	0.00211098	0.00171186	0.00138399	0.000620305	0.00100215			0.025979	0.0178289		0.00171186	0.00100215
NM_001252332	410	153	161	157	154	187	170.5		572	554	563	556	414	485		0.0206311	0.0227884	0.0217097	0.0255729	0.0176498	0.0216114		0.00119758	0.000721902	0.000959742	0.00143029	0.000597224	0.00101376			0.0217097	0.0216114		0.000959742	0.00101376
NM_178644	263	131	207	169	66	172	119		759	901	830	613	357	485		0.0176645	0.0292994	0.0234819	0.0109598	0.0162341	0.0135969		0.0015891	0.00117407	0.00138158	0.00157693	0.000514998	0.00104596			0.0234819	0.0135969		0.00138158	0.00104596
NM_029282	1066	86	118	102	100	82	91		337	1029	683	441	530	485.5		0.0115965	0.0167021	0.0141493	0.0166058	0.0077395	0.0121726		0.000705569	0.00134086	0.00102322	0.00113446	0.000764562	0.000949511			0.0141493	0.0121726		0.00102322	0.000949511
NM_146190	1005	114	126	120	165	123	144		402	1020	711	446	525	485.5		0.0153722	0.0178344	0.0166033	0.0273995	0.0116092	0.0195044		0.000841657	0.00132913	0.0010854	0.00114732	0.00075735	0.000952336			0.0166033	0.0195044		0.0010854	0.000952336
NM_001007465	344	139	123	131	70	74	72		851	1173	1012	490	481	485.5		0.0187433	0.0174098	0.0180765	0.011624	0.00698443	0.00930424		0.00178172	0.0015285	0.00165511	0.00126051	0.000693876	0.000977194			0.0180765	0.00930424		0.00165511	0.000977194
NM_001112703	1123	95	112	103.5	124	80	102		371	1158	764.5	506	466	486		0.0128101	0.0158528	0.0143315	0.0205912	0.00755073	0.0140709		0.000776754	0.00150896	0.00114286	0.00130167	0.000672238	0.000986955			0.0143315	0.0140709		0.00114286	0.000986955
NM_001081090	826	200	184	192	282	321	301.5		153	709	431	189	785	487		0.0269687	0.0260439	0.0265063	0.0468283	0.0302973	0.0385628		0.000320332	0.000923878	0.000622105	0.000486197	0.00113242	0.000809308			0.0265063	0.0385628		0.000622105	0.000809308
NM_027977	396	292	239	265.5	279	306	292.5		525	710	617.5	461	513	487		0.0393743	0.0338287	0.0366015	0.0463301	0.0288815	0.0376058		0.00109918	0.000925181	0.00101218	0.00118591	0.000740039	0.000962974			0.0366015	0.0376058		0.00101218	0.000962974
NM_026572	151	96	114	105	56	132	94		725	581	653	469	505	487		0.012945	0.0161359	0.0145404	0.00929924	0.0124587	0.010879		0.00151791	0.000757085	0.0011375	0.00120649	0.000728498	0.000967494			0.0145404	0.010879		0.0011375	0.000967494
NM_011027	576	151	173	162	99	225	162		809	660	734.5	480	494	487		0.0203614	0.0244869	0.0224241	0.0164397	0.0212364	0.0188381		0.00169378	0.000860028	0.00127691	0.00123479	0.00071263	0.000973708			0.0224241	0.0188381		0.00127691	0.000973708
NM_001144988	595	88	134	111	88	163	125.5		352	890	621	446	529	487.5		0.0118662	0.0189667	0.0154165	0.0146131	0.0153846	0.0149989		0.000736974	0.00115973	0.000948354	0.00114732	0.00076312	0.000955221			0.0154165	0.0149989		0.000948354	0.000955221
NM_001164089	258	91	117	104	110	107	108.5		295	1118	706.5	325	650	487.5		0.0122708	0.0165605	0.0144156	0.0182664	0.0100991	0.0141827		0.000617634	0.00145684	0.00103723	0.000836054	0.000937671	0.000886862			0.0144156	0.0141827		0.00103723	0.000886862
NM_027411	589	243	113	178	182	176	179		812	678	745	455	521	488		0.032767	0.0159943	0.0243807	0.0302225	0.0166116	0.0234171		0.00170006	0.000883483	0.00129177	0.00117048	0.000751579	0.000961027			0.0243807	0.0234171		0.00129177	0.000961027
NM_027395	207	253	266	259.5	211	505	358		557	510	533.5	603	374	488.5		0.0341154	0.0376504	0.0358829	0.0350382	0.047664	0.0413511		0.00116618	0.000664567	0.000915372	0.0015512	0.000539521	0.00104536			0.0358829	0.0413511		0.000915372	0.00104536
NM_138601	247	75	138	106.5	103	192	147.5		631	515	573	704	273	488.5		0.0101133	0.0195329	0.0148231	0.017104	0.0181218	0.0176129		0.00132111	0.000671082	0.000996096	0.00181102	0.000393822	0.00110242			0.0148231	0.0176129		0.000996096	0.00110242
NM_013692	460	322	866	594	96	637	366.5		449	2452	1450.5	120	857	488.5		0.0434196	0.122576	0.0829979	0.0159415	0.0601227	0.0380321		0.00094006	0.00319513	0.0020676	0.000308697	0.00123628	0.00077249			0.0829979	0.0380321		0.0020676	0.00077249
NM_172307	496	140	97	118.5	155	133	144		220	857	538.5	293	685	489		0.0188781	0.0137297	0.0163039	0.025739	0.0125531	0.019146		0.000460609	0.00111673	0.000788671	0.000753735	0.000988161	0.000870948			0.0163039	0.019146		0.000788671	0.000870948
NM_028177	137	261	306	283.5	242	406	324		410	463	436.5	608	372	490		0.0351942	0.0433121	0.0392531	0.040186	0.03832	0.039253		0.000858407	0.000603323	0.000730865	0.00156406	0.000536636	0.00105035			0.0392531	0.039253		0.000730865	0.00105035
NM_008027	409	113	91	102	122	104	113		537	623	580	677	303	490		0.0152373	0.0128804	0.0140589	0.0202591	0.00981595	0.0150375		0.0011243	0.000811814	0.000968059	0.00174156	0.000437099	0.00108933			0.0140589	0.0150375		0.000968059	0.00108933
NM_023536	219	249	235	242	254	307	280.5		616	651	633.5	592	388	490		0.0335761	0.0332626	0.0334193	0.0421787	0.0289759	0.0355773		0.0012897	0.0008483	0.001069	0.0015229	0.000559717	0.00104131			0.0334193	0.0355773		0.001069	0.00104131
NM_026254	665	113	144	128.5	131	217	174		292	933	612.5	353	628	490.5		0.0152373	0.0203822	0.0178097	0.0217536	0.0204814	0.0211175		0.000611353	0.00121577	0.00091356	0.000908083	0.000905934	0.000907009			0.0178097	0.0211175		0.00091356	0.000907009
NM_010324	394	108	186	147	90	241	165.5		372	978	675	351	630	490.5		0.0145631	0.026327	0.020445	0.0149452	0.0227466	0.0188459		0.000778847	0.0012744	0.00102663	0.000902938	0.000908819	0.000905879			0.020445	0.0188459		0.00102663	0.000905879
NM_145619	509	82	126	104	67	215	141		396	982	689	426	555	490.5		0.0110572	0.0178344	0.0144458	0.0111259	0.0202926	0.0157092		0.000829095	0.00127962	0.00105436	0.00109587	0.000800627	0.00094825			0.0144458	0.0157092		0.00105436	0.00094825
NM_001164570	358	143	127	135	72	74	73		852	1188	1020	498	483	490.5		0.0192826	0.0179759	0.0186293	0.0119562	0.00698443	0.00947029		0.00178381	0.00154805	0.00166593	0.00128109	0.000696762	0.000988927			0.0186293	0.00947029		0.00166593	0.000988927
NM_026070	175	88	117	102.5	110	168	139		364	499	431.5	538	444	491		0.0118662	0.0165605	0.0142134	0.0182664	0.0158565	0.0170614		0.000762098	0.000650233	0.000706165	0.00138399	0.000640501	0.00101225			0.0142134	0.0170614		0.000706165	0.00101225
NM_001136054	497	138	147	142.5	136	245	190.5		412	753	582.5	428	554	491		0.0186084	0.0208068	0.0197076	0.0225839	0.0231241	0.022854		0.000862594	0.000981214	0.000921904	0.00110102	0.000799184	0.000950101			0.0197076	0.022854		0.000921904	0.000950101
NM_175666	107	628	1641	1134.5	731	3077	1904		542	683	612.5	572	410	491		0.0846818	0.232272	0.158477	0.121388	0.29042	0.205904		0.00113477	0.000889999	0.00101239	0.00147145	0.000591454	0.00103145			0.158477	0.205904		0.00101239	0.00103145
NM_016985	650	112	88	100	82	97	89.5		362	938	650	372	610	491		0.0151025	0.0124558	0.0137791	0.0136167	0.00915526	0.011386		0.00075791	0.00122228	0.000990096	0.00095696	0.000879968	0.000918464			0.0137791	0.011386		0.000990096	0.000918464
NM_001243916	466	67	147	107	158	432	295		219	459	339	244	739	491.5		0.00903452	0.0208068	0.0149207	0.0262371	0.0407739	0.0335055		0.000458515	0.00059811	0.000528313	0.000627683	0.00106606	0.000846872			0.0149207	0.0335055		0.000528313	0.000846872
NM_001110142	951	217	196	206.5	215	234	224.5		200	968	584	222	762	492		0.0292611	0.0277424	0.0285017	0.0357024	0.0220859	0.0288942		0.000418735	0.00126137	0.000840055	0.000571089	0.00109924	0.000835164			0.0285017	0.0288942		0.000840055	0.000835164
NM_028288	951	217	196	206.5	215	234	224.5		200	968	584	222	762	492		0.0292611	0.0277424	0.0285017	0.0357024	0.0220859	0.0288942		0.000418735	0.00126137	0.000840055	0.000571089	0.00109924	0.000835164			0.0285017	0.0288942		0.000840055	0.000835164
NM_133792	393	345	632	488.5	252	653	452.5		598	1080	839	566	418	492		0.046521	0.0894551	0.067988	0.0418466	0.0616328	0.0517397		0.00125202	0.00140732	0.00132967	0.00145602	0.000602994	0.00102951			0.067988	0.0517397		0.00132967	0.00102951
NM_001136471	570	130	83	106.5	112	205	158.5		468	415	441.5	654	331	492.5		0.0175297	0.0117481	0.0146389	0.0185985	0.0193487	0.0189736		0.00097984	0.000540775	0.000760308	0.0016824	0.000477491	0.00107994			0.0146389	0.0189736		0.000760308	0.00107994
NM_080837	147	252	280	266	200	416	308		525	459	492	546	439	492.5		0.0339806	0.039632	0.0368063	0.0332116	0.0392638	0.0362377		0.00109918	0.00059811	0.000848645	0.00140457	0.000633288	0.00101893			0.0368063	0.0362377		0.000848645	0.00101893
NM_011121	584	219	243	231	312	270	291		369	811	590	634	351	492.5		0.0295307	0.0343949	0.0319628	0.05181	0.0254837	0.0386469		0.000772566	0.00105679	0.000914679	0.00163095	0.000506342	0.00106865			0.0319628	0.0386469		0.000914679	0.00106865
NM_133999	888	106	188	147	129	164	146.5		332	952	642	445	540	492.5		0.0142934	0.02661	0.0204517	0.0214215	0.015479	0.0184502		0.0006951	0.00124053	0.000967813	0.00114475	0.000778988	0.000961869			0.0204517	0.0184502		0.000967813	0.000961869
NM_019698	776	95	159	127	137	115	126		567	1041	804	556	429	492.5		0.0128101	0.0225053	0.0176577	0.0227499	0.0108542	0.016802		0.00118711	0.0013565	0.00127181	0.00143029	0.000618863	0.00102458			0.0176577	0.016802		0.00127181	0.00102458
NM_001199272	444	104	116	110	145	217	181		248	673	460.5	339	647	493		0.0140237	0.016419	0.0152213	0.0240784	0.0204814	0.0222799		0.000519231	0.000876968	0.0006981	0.000872068	0.000933343	0.000902706			0.0152213	0.0222799		0.0006981	0.000902706
NM_026175	772	305	546	425.5	401	689	545		310	840	575	563	423	493		0.0411273	0.0772824	0.0592048	0.0665892	0.0650307	0.0658099		0.000649039	0.00109458	0.00087181	0.0014483	0.000610207	0.00102925			0.0592048	0.0658099		0.00087181	0.00102925
NM_019806	224	144	204	174	144	336	240		394	763	578.5	441	545	493		0.0194175	0.0288747	0.0241461	0.0239123	0.0317131	0.0278127		0.000824908	0.000994244	0.000909576	0.00113446	0.000786201	0.000960331			0.0241461	0.0278127		0.000909576	0.000960331
NM_001164569	379	145	127	136	78	75	76.5		852	1202	1027	498	488	493		0.0195523	0.0179759	0.0187641	0.0129525	0.00707881	0.0100157		0.00178381	0.00156629	0.00167505	0.00128109	0.000703974	0.000992533			0.0187641	0.0100157		0.00167505	0.000992533
NM_172620	704	133	204	168.5	130	234	182		677	1232	954.5	531	456	493.5		0.0179342	0.0288747	0.0234045	0.0215875	0.0220859	0.0218367		0.00141742	0.00160539	0.0015114	0.00136598	0.000657812	0.0010119			0.0234045	0.0218367		0.0015114	0.0010119
NM_001195298	655	133	184	158.5	232	352	292		370	574	472	617	372	494.5		0.0179342	0.0260439	0.021989	0.0385254	0.0332232	0.0358743		0.00077466	0.000747964	0.000761312	0.00158722	0.000536636	0.00106193			0.021989	0.0358743		0.000761312	0.00106193
NM_001164249	265	282	201	241.5	212	283	247.5		611	508	559.5	489	500	494.5		0.0380259	0.0284501	0.033238	0.0352043	0.0267107	0.0309575		0.00127924	0.000661961	0.000970598	0.00125794	0.000721285	0.000989612			0.033238	0.0309575		0.000970598	0.000989612
NM_021385	490	198	132	165	128	182	155		457	824	640.5	367	622	494.5		0.026699	0.0186837	0.0226913	0.0212554	0.0171779	0.0192167		0.00095681	0.00107373	0.00101527	0.000944098	0.000897279	0.000920688			0.0226913	0.0192167		0.00101527	0.000920688
NM_001166368	121	174	191	182.5	149	271	210		399	206	302.5	759	232	495.5		0.0234628	0.0270347	0.0252487	0.0247426	0.0255781	0.0251604		0.000835376	0.000268433	0.000551905	0.00195251	0.000334676	0.00114359			0.0252487	0.0251604		0.000551905	0.00114359
NM_008020	121	174	191	182.5	149	271	210		399	206	302.5	759	232	495.5		0.0234628	0.0270347	0.0252487	0.0247426	0.0255781	0.0251604		0.000835376	0.000268433	0.000551905	0.00195251	0.000334676	0.00114359			0.0252487	0.0251604		0.000551905	0.00114359
NM_001042707	879	191	228	209.5	194	234	214		459	839	649	687	304	495.5		0.0257551	0.0322718	0.0290134	0.0322152	0.0220859	0.0271506		0.000960997	0.00109328	0.00102714	0.00176729	0.000438541	0.00110292			0.0290134	0.0271506		0.00102714	0.00110292
NM_010500	289	489	576	532.5	262	495	378.5		1043	1490	1266.5	561	430	495.5		0.0659385	0.0815287	0.0737336	0.0435071	0.0467202	0.0451136		0.0021837	0.00194158	0.00206264	0.00144316	0.000620305	0.00103173			0.0737336	0.0451136		0.00206264	0.00103173
NM_153779	361	103	97	100	74	114	94		780	684	732	664	328	496		0.0138889	0.0137297	0.0138093	0.0122883	0.0107598	0.011524		0.00163307	0.000891302	0.00126218	0.00170812	0.000473163	0.00109064			0.0138093	0.011524		0.00126218	0.00109064
NM_197991	249	142	169	155.5	153	254	203.5		341	851	596	456	537	496.5		0.0191478	0.0239207	0.0215343	0.0254068	0.0239736	0.0246902		0.000713943	0.00110891	0.000911429	0.00117305	0.00077466	0.000973854			0.0215343	0.0246902		0.000911429	0.000973854
NM_172678	606	135	127	131	112	116	114		473	1125	799	580	413	496.5		0.0182039	0.0179759	0.0180899	0.0185985	0.0109486	0.0147735		0.000990308	0.00146596	0.00122813	0.00149203	0.000595782	0.00104391			0.0180899	0.0147735		0.00122813	0.00104391
NM_023835	278	110	151	130.5	166	541	353.5		186	333	259.5	379	616	497.5		0.0148328	0.021373	0.0181029	0.0275656	0.0510618	0.0393137		0.000389424	0.000433923	0.000411673	0.000974967	0.000888623	0.000931795			0.0181029	0.0393137		0.000411673	0.000931795
NM_001164177	132	221	251	236	264	400	332		712	576	644	665	330	497.5		0.0298004	0.0355272	0.0326638	0.0438393	0.0377537	0.0407965		0.0014907	0.00075057	0.00112063	0.00171069	0.000476048	0.00109337			0.0326638	0.0407965		0.00112063	0.00109337
NM_016703	398	121	159	140	126	142	134		436	979	707.5	514	482	498		0.0163161	0.0225053	0.0194107	0.0209233	0.0134025	0.0171629		0.000912842	0.00127571	0.00109428	0.00132225	0.000695319	0.00100879			0.0194107	0.0171629		0.00109428	0.00100879
NM_010209	488	214	384	299	253	309	281		505	1034	769.5	570	426	498		0.0288565	0.0543524	0.0416045	0.0420126	0.0291647	0.0355887		0.00105731	0.00134738	0.00120234	0.00146631	0.000614535	0.00104042			0.0416045	0.0355887		0.00120234	0.00104042
NM_053187	436	109	118	113.5	149	221	185		250	681	465.5	347	650	498.5		0.014698	0.0167021	0.0157	0.0247426	0.0208589	0.0228008		0.000523419	0.000887392	0.000705406	0.000892648	0.000937671	0.000915159			0.0157	0.0228008		0.000705406	0.000915159
NM_001163126	810	98	139	118.5	89	126	107.5		320	1057	688.5	316	681	498.5		0.0132147	0.0196745	0.0164446	0.0147791	0.0118924	0.0133358		0.000669976	0.00137735	0.00102366	0.000812901	0.000982391	0.000897646			0.0164446	0.0133358		0.00102366	0.000897646
NM_029635	179	69	131	100	42	231	136.5		519	532	525.5	479	519	499		0.00930421	0.0185421	0.0139232	0.00697443	0.0218027	0.0143886		0.00108662	0.000693235	0.000889926	0.00123221	0.000748694	0.000990454			0.0139232	0.0143886		0.000889926	0.000990454
NM_027453	139	179	161	170	121	207	164		395	787	591	436	563	499.5		0.024137	0.0227884	0.0234627	0.020093	0.0195375	0.0198153		0.000827002	0.00102552	0.00092626	0.0011216	0.000812167	0.000966883			0.0234627	0.0198153		0.00092626	0.000966883
NM_178347	578	114	187	150.5	114	171	142.5		402	961	681.5	486	514	500		0.0153722	0.0264685	0.0209203	0.0189306	0.0161397	0.0175351		0.000841657	0.00125225	0.00104696	0.00125022	0.000741481	0.000995852			0.0209203	0.0175351		0.00104696	0.000995852
NM_012003	256	90	120	105	113	113	113		308	1179	743.5	334	666	500		0.0121359	0.0169851	0.0145605	0.0187645	0.0106654	0.014715		0.000644852	0.00153632	0.00109059	0.000859206	0.000960752	0.000909979			0.0145605	0.014715		0.00109059	0.000909979
NM_021315	788	177	184	180.5	155	138	146.5		392	1274	833	351	649	500		0.0238673	0.0260439	0.0249556	0.025739	0.013025	0.019382		0.000820721	0.00166011	0.00124042	0.000902938	0.000936228	0.000919583			0.0249556	0.019382		0.00124042	0.000919583
NM_009164	563	208	183	195.5	225	256	240.5		352	1386	869	323	677	500		0.0280475	0.0259023	0.0269749	0.037363	0.0241623	0.0307627		0.000736974	0.00180606	0.00127152	0.000830909	0.00097662	0.000903765			0.0269749	0.0307627		0.00127152	0.000903765
NM_013902	205	165	202	183.5	138	338	238		289	712	500.5	252	750	501		0.0222492	0.0285916	0.0254204	0.022916	0.0319018	0.0274089		0.000605072	0.000927788	0.00076643	0.000648263	0.00108193	0.000865096			0.0254204	0.0274089		0.00076643	0.000865096
NM_146164	661	148	195	171.5	129	304	216.5		380	935	657.5	425	577	501		0.0199569	0.0276008	0.0237788	0.0214215	0.0286928	0.0250571		0.000795597	0.00121837	0.00100698	0.0010933	0.000832363	0.000962832			0.0237788	0.0250571		0.00100698	0.000962832
NM_016981	801	119	102	110.5	140	201	170.5		158	790	474	161	842	501.5		0.0160464	0.0144374	0.0152419	0.0232481	0.0189712	0.0211097		0.000330801	0.00102943	0.000680114	0.000414168	0.00121464	0.000814406			0.0152419	0.0211097		0.000680114	0.000814406
NM_026126	132	144	162	153	143	185	164		399	810	604.5	371	632	501.5		0.0194175	0.0229299	0.0211737	0.0237463	0.0174611	0.0206037		0.000835376	0.00105549	0.000945433	0.000954387	0.000911705	0.000933046			0.0211737	0.0206037		0.000945433	0.000933046
NM_016865	256	123	118	120.5	167	167	167		680	535	607.5	738	265	501.5		0.0165858	0.0167021	0.0166439	0.0277317	0.0157622	0.0217469		0.0014237	0.000697144	0.00106042	0.00189849	0.000382281	0.00114038			0.0166439	0.0217469		0.00106042	0.00114038
NM_175655	84	4234	8219	6226.5	4052	12120	8086		433	886	659.5	423	580	501.5		0.570928	1.16334	0.867134	0.672866	1.14394	0.908401		0.000906561	0.00115452	0.00103054	0.00108816	0.000836691	0.000962423			0.867134	0.908401		0.00103054	0.000962423
NM_001083891	85	39	266	152.5	63	375	219		651	437	544	698	306	502		0.0052589	0.0376504	0.0214546	0.0104616	0.0353941	0.0229278		0.00136298	0.000569443	0.000966213	0.00179559	0.000441427	0.00111851			0.0214546	0.0229278		0.000966213	0.00111851
NM_144543	207	101	178	139.5	121	293	207		589	875	732	463	541	502		0.0136192	0.0251946	0.0194069	0.020093	0.0276546	0.0238738		0.00123317	0.00114019	0.00118668	0.00119105	0.000780431	0.000985743			0.0194069	0.0238738		0.00118668	0.000985743
NM_183149	889	98	111	104.5	72	120	96		340	1197	768.5	494	510	502		0.0132147	0.0157113	0.014463	0.0119562	0.0113261	0.0116411		0.00071185	0.00155978	0.00113581	0.0012708	0.000735711	0.00100326			0.014463	0.0116411		0.00113581	0.00100326
NM_007483	177	919	1044	981.5	229	663	446		1604	2579	2091.5	289	716	502.5		0.123921	0.147771	0.135846	0.0380272	0.0625767	0.050302		0.00335826	0.00336062	0.00335944	0.000743445	0.00103288	0.000888163			0.135846	0.050302		0.00335944	0.000888163
NM_024200	722	129	128	128.5	136	97	116.5		342	931	636.5	480	526	503		0.0173948	0.0181175	0.0177562	0.0225839	0.00915526	0.0158696		0.000716037	0.00121316	0.000964599	0.00123479	0.000758792	0.00099679			0.0177562	0.0158696		0.000964599	0.00099679
NM_001162942	265	222	356	289	209	473	341		176	1293	734.5	194	812	503		0.0299353	0.0503892	0.0401623	0.0347061	0.0446437	0.0396749		0.000368487	0.00168487	0.00102668	0.00049906	0.00117137	0.000835214			0.0401623	0.0396749		0.00102668	0.000835214
NM_148929	557	202	206	204	167	204	185.5		671	925	798	588	418	503		0.0272384	0.0291578	0.0281981	0.0277317	0.0192544	0.023493		0.00140486	0.00120534	0.0013051	0.00151261	0.000602994	0.0010578			0.0281981	0.023493		0.0013051	0.0010578
NM_001253758	118	198	83	140.5	228	116	172		457	326	391.5	718	289	503.5		0.026699	0.0117481	0.0192235	0.0378612	0.0109486	0.0244049		0.00095681	0.000424802	0.000690806	0.00184704	0.000416903	0.00113197			0.0192235	0.0244049		0.000690806	0.00113197
NM_001004157	801	78	170	124	94	380	237		278	973	625.5	345	662	503.5		0.0105178	0.0240623	0.01729	0.0156094	0.035866	0.0257377		0.000582042	0.00126789	0.000924966	0.000887503	0.000954982	0.000921242			0.01729	0.0257377		0.000924966	0.000921242
NM_019704	331	124	104	114	102	186	144		641	862	751.5	552	456	504		0.0167206	0.0147205	0.0157205	0.0169379	0.0175555	0.0172467		0.00134205	0.00112325	0.00123265	0.00142001	0.000657812	0.00103891			0.0157205	0.0172467		0.00123265	0.00103891
NM_001177867	1045	112	110	111	183	203	193		83	710	396.5	164	845	504.5		0.0151025	0.0155697	0.0153361	0.0303886	0.01916	0.0247743		0.000173775	0.000925181	0.000549478	0.000421886	0.00121897	0.000820429			0.0153361	0.0247743		0.000549478	0.000820429
NM_198411	1252	211	471	341	213	378	295.5		280	2217	1248.5	203	806	504.5		0.028452	0.0666667	0.0475593	0.0353703	0.0356772	0.0355238		0.000586229	0.00288891	0.00173757	0.000522212	0.00116271	0.000842462			0.0475593	0.0355238		0.00173757	0.000842462
NM_024427	265	282	204	243	214	286	250		612	541	576.5	510	500	505		0.0380259	0.0288747	0.0334503	0.0355364	0.0269939	0.0312651		0.00128133	0.000704962	0.000993146	0.00131196	0.000721285	0.00101662			0.0334503	0.0312651		0.000993146	0.00101662
NM_145353	328	141	225	183	195	252	223.5		728	818	773	721	290	505.5		0.0190129	0.0318471	0.02543	0.0323813	0.0237848	0.028083		0.0015242	0.00106591	0.00129505	0.00185475	0.000418345	0.00113655			0.02543	0.028083		0.00129505	0.00113655
NM_029624	555	113	124	118.5	96	174	135		449	823	636	489	523	506		0.0152373	0.0175513	0.0163943	0.0159415	0.0164228	0.0161822		0.00094006	0.00107243	0.00100624	0.00125794	0.000754464	0.0010062			0.0163943	0.0161822		0.00100624	0.0010062
NM_053268	828	145	61	103	103	60	81.5		527	1431	979	419	593	506		0.0195523	0.00863411	0.0140932	0.017104	0.00566305	0.0113835		0.00110337	0.0018647	0.00148403	0.00107787	0.000855444	0.000966655			0.0140932	0.0113835		0.00148403	0.000966655
NM_010561	892	199	234	216.5	195	235	215		461	856	658.5	701	313	507		0.0268339	0.033121	0.0299774	0.0323813	0.0221803	0.0272808		0.000965184	0.00111543	0.00104031	0.0018033	0.000451525	0.00112741			0.0299774	0.0272808		0.00104031	0.00112741
NM_021511	346	224	209	216.5	201	340	270.5		429	754	591.5	409	606	507.5		0.030205	0.0295824	0.0298937	0.0333776	0.0320906	0.0327341		0.000898187	0.000982517	0.000940352	0.00105214	0.000874198	0.00096317			0.0298937	0.0327341		0.000940352	0.00096317
NM_028038	521	112	126	119	120	168	144		471	768	619.5	577	440	508.5		0.0151025	0.0178344	0.0164684	0.0199269	0.0158565	0.0178917		0.000986121	0.00100076	0.00099344	0.00148432	0.000634731	0.00105952			0.0164684	0.0178917		0.00099344	0.00105952
NM_016918	199	94	141	117.5	82	184	133		267	985	626	270	747	508.5		0.0126753	0.0199575	0.0163164	0.0136167	0.0173667	0.0154917		0.000559011	0.00128353	0.000921269	0.000694568	0.0010776	0.000886084			0.0163164	0.0154917		0.000921269	0.000886084
NM_173440	1142	109	108	108.5	124	123	123.5		297	1569	933	264	753	508.5		0.014698	0.0152866	0.0149923	0.0205912	0.0116092	0.0161002		0.000621822	0.00204452	0.00133317	0.000679133	0.00108626	0.000882694			0.0149923	0.0161002		0.00133317	0.000882694
NM_001164250	265	301	204	252.5	236	309	272.5		569	514	541.5	521	498	509.5		0.0405879	0.0288747	0.0347313	0.0391896	0.0291647	0.0341772		0.0011913	0.000669779	0.00093054	0.00134026	0.0007184	0.00102933			0.0347313	0.0341772		0.00093054	0.00102933
NM_026914	88	145	289	217	105	407	256		482	755	618.5	500	520	510		0.0195523	0.0409059	0.0302291	0.0174361	0.0384143	0.0279252		0.00100915	0.00098382	0.000996486	0.00128624	0.000750137	0.00101819			0.0302291	0.0279252		0.000996486	0.00101819
NM_009424	511	265	136	200.5	59	87	73		535	1419	977	251	770	510.5		0.0357335	0.0192498	0.0274917	0.00979741	0.00821142	0.00900441		0.00112012	0.00184906	0.00148459	0.000645691	0.00111078	0.000878235			0.0274917	0.00900441		0.00148459	0.000878235
NM_144516	529	140	86	113	154	201	177.5		313	726	519.5	359	664	511.5		0.0188781	0.0121727	0.0155254	0.0255729	0.0189712	0.0222721		0.00065532	0.000946031	0.000800675	0.000923518	0.000957867	0.000940692			0.0155254	0.0222721		0.000800675	0.000940692
NM_001167730	537	210	137	173.5	124	183	153.5		447	891	669	381	642	511.5		0.0283172	0.0193914	0.0238543	0.0205912	0.0172723	0.0189317		0.000935873	0.00116104	0.00104846	0.000980112	0.00092613	0.000953121			0.0238543	0.0189317		0.00104846	0.000953121
NM_018807	477	155	64	109.5	239	164	201.5		159	941	550	147	877	512		0.0209008	0.00905874	0.0149797	0.0396878	0.015479	0.0275834		0.000332894	0.00122619	0.000779543	0.000378154	0.00126513	0.000821644			0.0149797	0.0275834		0.000779543	0.000821644
NM_020008	225	29	410	219.5	20	454	237		112	1113	612.5	94	931	512.5		0.00391046	0.0580326	0.0309715	0.00332116	0.0428504	0.0230858		0.000234492	0.00145032	0.000842406	0.000241812	0.00134303	0.000792423			0.0309715	0.0230858		0.000842406	0.000792423
NM_001164242	350	120	129	124.5	115	136	125.5		605	664	634.5	537	488	512.5		0.0161812	0.018259	0.0172201	0.0190966	0.0128362	0.0159664		0.00126667	0.00086524	0.00106596	0.00138142	0.000703974	0.0010427			0.0172201	0.0159664		0.00106596	0.0010427
NM_144806	350	120	129	124.5	115	136	125.5		605	664	634.5	537	488	512.5		0.0161812	0.018259	0.0172201	0.0190966	0.0128362	0.0159664		0.00126667	0.00086524	0.00106596	0.00138142	0.000703974	0.0010427			0.0172201	0.0159664		0.00106596	0.0010427
NM_138753	337	119	86	102.5	131	97	114		436	906	671	656	369	512.5		0.0160464	0.0121727	0.0141095	0.0217536	0.00915526	0.0154544		0.000912842	0.00118058	0.00104671	0.00168754	0.000532309	0.00110993			0.0141095	0.0154544		0.00104671	0.00110993
NM_025485	340	100	169	134.5	104	323	213.5		365	484	424.5	574	452	513		0.0134844	0.0239207	0.0187025	0.01727	0.0304861	0.023878		0.000764191	0.000630687	0.000697439	0.0014766	0.000652042	0.00106432			0.0187025	0.023878		0.000697439	0.00106432
NM_133952	925	110	106	108	137	101	119		491	679	585	701	325	513		0.0148328	0.0150035	0.0149182	0.0227499	0.0095328	0.0161414		0.00102799	0.000884786	0.00095639	0.0018033	0.000468835	0.00113607			0.0149182	0.0161414		0.00095639	0.00113607
NM_001164413	691	170	185	177.5	100	342	221		259	910	584.5	159	868	513.5		0.0229234	0.0261854	0.0245544	0.0166058	0.0322794	0.0244426		0.000542262	0.0011858	0.000864029	0.000409023	0.00125215	0.000830587			0.0245544	0.0244426		0.000864029	0.000830587
NM_170757	898	187	88	137.5	199	162	180.5		582	998	790	360	667	513.5		0.0252157	0.0124558	0.0188358	0.0330455	0.0152902	0.0241679		0.00121852	0.00130047	0.00125949	0.00092609	0.000962195	0.000944142			0.0188358	0.0241679		0.00125949	0.000944142
NM_008795	432	157	195	176	175	171	173		430	1712	1071	356	671	513.5		0.0211704	0.0276008	0.0243856	0.0290601	0.0161397	0.0225999		0.00090028	0.00223086	0.00156557	0.0009158	0.000967965	0.000941883			0.0243856	0.0225999		0.00156557	0.000941883
NM_001008422	1237	162	115	138.5	207	306	256.5		256	1041	648.5	436	593	514.5		0.0218447	0.0162774	0.019061	0.034374	0.0288815	0.0316278		0.000535981	0.0013565	0.00094624	0.0011216	0.000855444	0.000988521			0.019061	0.0316278		0.00094624	0.000988521
NM_010589	1081	87	171	129	99	130	114.5		519	1112	815.5	615	415	515		0.0117314	0.0242038	0.0179676	0.0164397	0.0122699	0.0143548		0.00108662	0.00144902	0.00126782	0.00158207	0.000598667	0.00109037			0.0179676	0.0143548		0.00126782	0.00109037
NM_001102407	155	218	209	213.5	245	413	329		324	446	385	435	596	515.5		0.0293959	0.0295824	0.0294892	0.0406842	0.0389807	0.0398324		0.000678351	0.00058117	0.000629761	0.00111903	0.000859772	0.000989399			0.0294892	0.0398324		0.000629761	0.000989399
NM_025607	146	107	125	116	83	158	120.5		359	612	485.5	512	519	515.5		0.0144283	0.0176929	0.0160606	0.0137828	0.0149127	0.0143477		0.000751629	0.00079748	0.000774555	0.00131711	0.000748694	0.0010329			0.0160606	0.0143477		0.000774555	0.0010329
NM_025391	161	143	227	185	144	209	176.5		689	699	694	673	358	515.5		0.0192826	0.0321302	0.0257064	0.0239123	0.0197263	0.0218193		0.00144254	0.000910848	0.00117669	0.00173127	0.00051644	0.00112386			0.0257064	0.0218193		0.00117669	0.00112386
NM_019713	251	252	311	281.5	221	330	275.5		691	1240	965.5	518	513	515.5		0.0339806	0.0440198	0.0390002	0.0366988	0.0311468	0.0339228		0.00144673	0.00161581	0.00153127	0.00133254	0.000740039	0.00103629			0.0390002	0.0339228		0.00153127	0.00103629
NM_001199948	87	197	347	272	175	487	331		560	666	613	632	400	516		0.0265642	0.0491154	0.0378398	0.0290601	0.0459651	0.0375126		0.00117246	0.000867846	0.00102015	0.0016258	0.000577028	0.00110142			0.0378398	0.0375126		0.00102015	0.00110142
NM_028121	477	154	150	152	128	189	158.5		337	1106	721.5	436	597	516.5		0.0207659	0.0212314	0.0209987	0.0212554	0.0178386	0.019547		0.000705569	0.0014412	0.00107338	0.0011216	0.000861215	0.000991406			0.0209987	0.019547		0.00107338	0.000991406
NM_001190830	1081	87	171	129	99	130	114.5		519	1114	816.5	615	418	516.5		0.0117314	0.0242038	0.0179676	0.0164397	0.0122699	0.0143548		0.00108662	0.00145162	0.00126912	0.00158207	0.000602994	0.00109253			0.0179676	0.0143548		0.00126912	0.00109253
NM_028794	331	118	100	109	50	135	92.5		823	475	649	603	431	517		0.0159115	0.0141543	0.0150329	0.00830289	0.0127419	0.0105224		0.00172309	0.000618959	0.00117103	0.0015512	0.000621748	0.00108647			0.0150329	0.0105224		0.00117103	0.00108647
NM_023525	2206	207	333	270	186	196	191		551	1717	1134	572	462	517		0.0279126	0.0471338	0.0375232	0.0308867	0.0184993	0.024693		0.00115362	0.00223738	0.0016955	0.00147145	0.000666468	0.00106896			0.0375232	0.024693		0.0016955	0.00106896
NM_138312	398	122	95	108.5	141	229	185		130	730	430	170	865	517.5		0.0164509	0.0134466	0.0149487	0.0234141	0.021614	0.0225141		0.000272178	0.000951243	0.00061171	0.00043732	0.00124782	0.000842572			0.0149487	0.0225141		0.00061171	0.000842572
NM_007388	308	81	189	135	86	193	139.5		332	1083	707.5	573	464	518.5		0.0109223	0.0267516	0.018837	0.014281	0.0182161	0.0162486		0.0006951	0.00141123	0.00105316	0.00147403	0.000669353	0.00107169			0.018837	0.0162486		0.00105316	0.00107169
NM_001102404	308	81	189	135	86	193	139.5		332	1083	707.5	573	464	518.5		0.0109223	0.0267516	0.018837	0.014281	0.0182161	0.0162486		0.0006951	0.00141123	0.00105316	0.00147403	0.000669353	0.00107169			0.018837	0.0162486		0.00105316	0.00107169
NM_001102405	308	81	189	135	86	193	139.5		332	1083	707.5	573	464	518.5		0.0109223	0.0267516	0.018837	0.014281	0.0182161	0.0162486		0.0006951	0.00141123	0.00105316	0.00147403	0.000669353	0.00107169			0.018837	0.0162486		0.00105316	0.00107169
NM_001162941	298	228	392	310	211	513	362		180	1305	742.5	203	834	518.5		0.0307443	0.0554848	0.0431146	0.0350382	0.0484191	0.0417286		0.000376862	0.00170051	0.00103869	0.000522212	0.0012031	0.000862658			0.0431146	0.0417286		0.00103869	0.000862658
NM_001009573	1064	110	112	111	109	109	109		571	780	675.5	588	450	519		0.0148328	0.0158528	0.0153428	0.0181003	0.0102879	0.0141941		0.00119549	0.0010164	0.00110594	0.00151261	0.000649157	0.00108089			0.0153428	0.0141941		0.00110594	0.00108089
NM_028343	439	348	391	369.5	245	265	255		675	1476	1075.5	422	616	519		0.0469256	0.0553432	0.0511344	0.0406842	0.0250118	0.032848		0.00141323	0.00192334	0.00166828	0.00108558	0.000888623	0.000987104			0.0511344	0.032848		0.00166828	0.000987104
NM_001111312	409	283	234	258.5	170	324	247		564	856	710	450	589	519.5		0.0381607	0.033121	0.0356409	0.0282298	0.0305805	0.0294051		0.00118083	0.00111543	0.00114813	0.00115761	0.000849674	0.00100364			0.0356409	0.0294051		0.00114813	0.00100364
NM_022994	377	128	155	141.5	121	150	135.5		660	1005	832.5	623	416	519.5		0.01726	0.0219391	0.0195996	0.020093	0.0141576	0.0171253		0.00138183	0.00130959	0.00134571	0.00160265	0.000600109	0.00110138			0.0195996	0.0171253		0.00134571	0.00110138
NM_027213	176	110	122	116	129	202	165.5		498	453	475.5	536	504	520		0.0148328	0.0172682	0.0160505	0.0214215	0.0190656	0.0202435		0.00104265	0.000590292	0.000816471	0.00137885	0.000727056	0.00105295			0.0160505	0.0202435		0.000816471	0.00105295
NM_001026212	98	137	97	117	146	263	204.5		474	759	616.5	570	470	520		0.0184736	0.0137297	0.0161016	0.0242444	0.024823	0.0245337		0.000992402	0.000989032	0.000990717	0.00146631	0.000678008	0.00107216			0.0161016	0.0245337		0.000990717	0.00107216
NM_009682	174	66	148	107	70	187	128.5		306	790	548	338	704	521		0.00889968	0.0209483	0.014924	0.011624	0.0176498	0.0146369		0.000640665	0.00102943	0.000835046	0.000869496	0.00101557	0.000942533			0.014924	0.0146369		0.000835046	0.000942533
NM_145509	180	166	292	229	95	333	214		435	1084	759.5	303	739	521		0.022384	0.0413305	0.0318573	0.0157755	0.0314299	0.0236027		0.000910749	0.00141253	0.00116164	0.000779459	0.00106606	0.000922759			0.0318573	0.0236027		0.00116164	0.000922759
NM_134076	336	123	178	150.5	114	178	146		388	1199	793.5	597	445	521		0.0165858	0.0251946	0.0208902	0.0189306	0.0168004	0.0178655		0.000812346	0.00156238	0.00118736	0.00153577	0.000641944	0.00108886			0.0208902	0.0178655		0.00118736	0.00108886
NM_027968	727	130	99	114.5	135	114	124.5		237	901	569	276	767	521.5		0.0175297	0.0140127	0.0157712	0.0224178	0.0107598	0.0165888		0.000496201	0.00117407	0.000835135	0.000710003	0.00110645	0.000908227			0.0157712	0.0165888		0.000835135	0.000908227
NM_001168297	727	130	99	114.5	135	114	124.5		237	901	569	276	767	521.5		0.0175297	0.0140127	0.0157712	0.0224178	0.0107598	0.0165888		0.000496201	0.00117407	0.000835135	0.000710003	0.00110645	0.000908227			0.0157712	0.0165888		0.000835135	0.000908227
NM_001161824	441	88	174	131	116	243	179.5		465	729	597	531	512	521.5		0.0118662	0.0246285	0.0182473	0.0192627	0.0229353	0.021099		0.000973559	0.00094994	0.000961749	0.00136598	0.000738596	0.00105229			0.0182473	0.021099		0.000961749	0.00105229
NM_007435	717	281	352	316.5	221	353	287		435	1540	987.5	389	657	523		0.037891	0.0498231	0.0438571	0.0366988	0.0333176	0.0350082		0.000910749	0.00200673	0.00145874	0.00100069	0.000947769	0.00097423			0.0438571	0.0350082		0.00145874	0.00097423
NM_001003917	820	182	125	153.5	254	182	218		551	1037	794	585	464	524.5		0.0245415	0.0176929	0.0211172	0.0421787	0.0171779	0.0296783		0.00115362	0.00135129	0.00125245	0.0015049	0.000669353	0.00108712			0.0211172	0.0296783		0.00125245	0.00108712
NM_001081218	703	129	115	122	121	132	126.5		410	1026	718	434	618	526		0.0173948	0.0162774	0.0168361	0.020093	0.0124587	0.0162758		0.000858407	0.00133695	0.00109768	0.00111645	0.000891509	0.00100398			0.0168361	0.0162758		0.00109768	0.00100398
NM_013664	349	221	278	249.5	164	148	156		712	1434	1073	586	466	526		0.0298004	0.0393489	0.0345747	0.0272335	0.0139689	0.0206012		0.0014907	0.00186861	0.00167965	0.00150747	0.000672238	0.00108985			0.0345747	0.0206012		0.00167965	0.00108985
NM_022985	204	205	197	201	259	387	323		220	755	487.5	285	768	526.5		0.0276429	0.0278839	0.0277634	0.043009	0.0365267	0.0397678		0.000460609	0.00098382	0.000722214	0.000733155	0.00110789	0.000920524			0.0277634	0.0397678		0.000722214	0.000920524
NM_023057	783	187	114	150.5	115	187	151		588	791	689.5	471	582	526.5		0.0252157	0.0161359	0.0206758	0.0190966	0.0176498	0.0183732		0.00123108	0.00103073	0.00113091	0.00121163	0.000839576	0.00102561			0.0206758	0.0183732		0.00113091	0.00102561
NM_001163316	255	88	112	100	112	134	123		598	907	752.5	543	510	526.5		0.0118662	0.0158528	0.0138595	0.0185985	0.0126475	0.015623		0.00125202	0.00118189	0.00121695	0.00139685	0.000735711	0.00106628			0.0138595	0.015623		0.00121695	0.00106628
NM_175172	437	175	147	161	208	261	234.5		318	916	617	411	643	527		0.0235976	0.0208068	0.0222022	0.03454	0.0246343	0.0295871		0.000665789	0.00119361	0.000929702	0.00105729	0.000927573	0.00099243			0.0222022	0.0295871		0.000929702	0.00099243
NM_172589	203	193	188	190.5	207	198	202.5		393	954	673.5	447	607	527		0.0260248	0.02661	0.0263174	0.034374	0.0186881	0.026531		0.000822814	0.00124313	0.00103297	0.0011499	0.00087564	0.00101277			0.0263174	0.026531		0.00103297	0.00101277
NM_011507	414	122	131	126.5	123	149	136		449	768	608.5	537	518	527.5		0.0164509	0.0185421	0.0174965	0.0204251	0.0140632	0.0172442		0.00094006	0.00100076	0.00097041	0.00138142	0.000747252	0.00106433			0.0174965	0.0172442		0.00097041	0.00106433
NM_001177658	276	172	197	184.5	146	318	232		404	678	541	491	565	528		0.0231931	0.0278839	0.0255385	0.0242444	0.0300142	0.0271293		0.000845845	0.000883483	0.000864664	0.00126308	0.000815052	0.00103907			0.0255385	0.0271293		0.000864664	0.00103907
NM_010586	2649	143	105	124	130	113	121.5		530	764	647	520	537	528.5		0.0192826	0.014862	0.0170723	0.0215875	0.0106654	0.0161265		0.00110965	0.000995547	0.0010526	0.00133769	0.00077466	0.00105617			0.0170723	0.0161265		0.0010526	0.00105617
NM_025569	134	238	253	245.5	206	415	310.5		597	775	686	545	512	528.5		0.0320928	0.0358103	0.0339516	0.0342079	0.0391694	0.0366887		0.00124992	0.00100988	0.0011299	0.001402	0.000738596	0.0010703			0.0339516	0.0366887		0.0011299	0.0010703
NM_153152	100	88	201	144.5	54	286	170		451	555	503	462	598	530		0.0118662	0.0284501	0.0201582	0.00896712	0.0269939	0.0179805		0.000944248	0.000723205	0.000833726	0.00118848	0.000862657	0.00102557			0.0201582	0.0179805		0.000833726	0.00102557
NM_134139	365	73	133	103	109	207	158		521	694	607.5	513	547	530		0.00984358	0.0188252	0.0143344	0.0181003	0.0195375	0.0188189		0.0010908	0.000904332	0.000997569	0.00131968	0.000789086	0.00105438			0.0143344	0.0188189		0.000997569	0.00105438
NM_008891	707	239	207	223	293	387	340		215	525	370	407	654	530.5		0.0322276	0.0292994	0.0307635	0.0486549	0.0365267	0.0425908		0.00045014	0.000684113	0.000567127	0.001047	0.000943441	0.000995219			0.0307635	0.0425908		0.000567127	0.000995219
NM_009949	639	92	141	116.5	107	208	157.5		252	773	512.5	453	608	530.5		0.0124056	0.0199575	0.0161816	0.0177682	0.0196319	0.0187		0.000527606	0.00100728	0.000767441	0.00116533	0.000877083	0.00102121			0.0161816	0.0187		0.000767441	0.00102121
NM_001083114	274	193	172	182.5	186	311	248.5		270	807	538.5	232	829	530.5		0.0260248	0.0243454	0.0251851	0.0308867	0.0293535	0.0301201		0.000565292	0.00105158	0.000808436	0.000596814	0.00119589	0.000896352			0.0251851	0.0301201		0.000808436	0.000896352
NM_025533	282	111	145	128	145	199	172		510	673	591.5	626	437	531.5		0.0149676	0.0205237	0.0177457	0.0240784	0.0187824	0.0214304		0.00106777	0.000876968	0.000972371	0.00161037	0.000630403	0.00112039			0.0177457	0.0214304		0.000972371	0.00112039
NM_007708	2036	145	117	131	151	143	147		489	931	710	629	434	531.5		0.0195523	0.0165605	0.0180564	0.0250747	0.0134969	0.0192858		0.00102381	0.00121316	0.00111848	0.00161809	0.000626076	0.00112208			0.0180564	0.0192858		0.00111848	0.00112208
NM_009387	214	136	228	182	155	252	203.5		619	818	718.5	626	437	531.5		0.0183387	0.0322718	0.0253052	0.025739	0.0237848	0.0247619		0.00129598	0.00106591	0.00118095	0.00161037	0.000630403	0.00112039			0.0253052	0.0247619		0.00118095	0.00112039
NM_007596	275	120	138	129	129	251	190		266	516	391	287	777	532		0.0161812	0.0195329	0.0178571	0.0214215	0.0236904	0.0225559		0.000556918	0.000672385	0.000614652	0.0007383	0.00112088	0.000929589			0.0178571	0.0225559		0.000614652	0.000929589
NM_173013	954	107	233	170	114	268	191		436	1493	964.5	607	457	532		0.0144283	0.0329795	0.0237039	0.0189306	0.025295	0.0221128		0.000912842	0.00194549	0.00142916	0.00156149	0.000659255	0.00111037			0.0237039	0.0221128		0.00142916	0.00111037
NM_025845	523	218	205	211.5	260	399	329.5		207	661	434	421	644	532.5		0.0293959	0.0290163	0.0292061	0.043175	0.0376593	0.0404171		0.000433391	0.000861331	0.000647361	0.00108301	0.000929015	0.00100601			0.0292061	0.0404171		0.000647361	0.00100601
NM_016781	311	103	192	147.5	98	132	115		788	672	730	757	308	532.5		0.0138889	0.0271762	0.0205326	0.0162737	0.0124587	0.0143662		0.00164982	0.000875665	0.00126274	0.00194736	0.000444312	0.00119584			0.0205326	0.0143662		0.00126274	0.00119584
NM_025573	203	188	191	189.5	205	318	261.5		316	531	423.5	478	588	533		0.0253506	0.0270347	0.0261926	0.0340418	0.0300142	0.032028		0.000661601	0.000691932	0.000676766	0.00122964	0.000848231	0.00103894			0.0261926	0.032028		0.000676766	0.00103894
NM_133737	431	126	99	112.5	168	112	140		327	641	484	595	471	533		0.0169903	0.0140127	0.0155015	0.0278977	0.010571	0.0192344		0.000684632	0.000835269	0.000759951	0.00153062	0.000679451	0.00110504			0.0155015	0.0192344		0.000759951	0.00110504
NM_001254735	213	191	217	204	269	239	254		667	843	755	562	504	533		0.0257551	0.0307148	0.028235	0.0446695	0.0225578	0.0336137		0.00139648	0.00109849	0.00124749	0.00144573	0.000727056	0.00108639			0.028235	0.0336137		0.00124749	0.00108639
NM_021548	93	172	157	164.5	159	280	219.5		686	483	584.5	673	394	533.5		0.0231931	0.0222222	0.0227077	0.0264032	0.0264276	0.0264154		0.00143626	0.000629384	0.00103282	0.00173127	0.000568373	0.00114982			0.0227077	0.0264154		0.00103282	0.00114982
NM_028053	273	152	101	126.5	178	83	130.5		743	503	623	816	251	533.5		0.0204962	0.0142958	0.017396	0.0295583	0.00783388	0.0186961		0.0015556	0.000655445	0.00110552	0.00209914	0.000362085	0.00123061			0.017396	0.0186961		0.00110552	0.00123061
NM_146124	420	263	432	347.5	285	414	349.5		432	1053	742.5	492	575	533.5		0.0354639	0.0611465	0.0483052	0.0473265	0.039075	0.0432008		0.000904468	0.00137214	0.0011383	0.00126566	0.000829478	0.00104757			0.0483052	0.0432008		0.0011383	0.00104757
NM_009101	199	109	133	121	115	166	140.5		280	506	393	656	412	534		0.014698	0.0188252	0.0167616	0.0190966	0.0156678	0.0173822		0.000586229	0.000659355	0.000622792	0.00168754	0.000594339	0.00114094			0.0167616	0.0173822		0.000622792	0.00114094
NM_026932	287	242	236	239	295	337	316		435	420	427.5	560	509	534.5		0.0326321	0.0334041	0.0330181	0.048987	0.0318075	0.0403973		0.000910749	0.00054729	0.00072902	0.00144058	0.000734268	0.00108743			0.0330181	0.0403973		0.00072902	0.00108743
NM_145376	515	163	143	153	86	162	124		442	1258	850	388	681	534.5		0.0219795	0.0202406	0.0211101	0.014281	0.0152902	0.0147856		0.000925404	0.00163927	0.00128233	0.00099812	0.000982391	0.000990255			0.0211101	0.0147856		0.00128233	0.000990255
NM_015729	642	213	372	292.5	236	349	292.5		649	1855	1252	451	618	534.5		0.0287217	0.0526539	0.0406878	0.0391896	0.0329401	0.0360649		0.0013588	0.0024172	0.001888	0.00116019	0.000891509	0.00102585			0.0406878	0.0360649		0.001888	0.00102585
NM_010478	623	759	376	567.5	256	290	273		2312	1362	1837	796	273	534.5		0.102346	0.0532201	0.0777832	0.0425108	0.0273714	0.0349411		0.00484058	0.00177478	0.00330768	0.00204769	0.000393822	0.00122076			0.0777832	0.0349411		0.00330768	0.00122076
NM_172465	345	140	114	127	156	97	126.5		544	1197	870.5	497	573	535		0.0188781	0.0161359	0.017507	0.025905	0.00915526	0.0175301		0.00113896	0.00155978	0.00134937	0.00127852	0.000826593	0.00105256			0.017507	0.0175301		0.00134937	0.00105256
NM_145942	501	256	174	215	171	159	165		567	1194	880.5	450	620	535		0.03452	0.0246285	0.0295742	0.0283959	0.0150071	0.0217015		0.00118711	0.00155587	0.00137149	0.00115761	0.000894394	0.001026			0.0295742	0.0217015		0.00137149	0.001026
NM_026861	326	141	116	128.5	162	193	177.5		539	740	639.5	528	544	536		0.0190129	0.016419	0.017716	0.0269014	0.0182161	0.0225588		0.00112849	0.000964274	0.00104638	0.00135827	0.000784758	0.00107151			0.017716	0.0225588		0.00104638	0.00107151
NM_026684	157	112	202	157	144	169	156.5		698	710	704	785	287	536		0.0151025	0.0285916	0.0218471	0.0239123	0.0159509	0.0199316		0.00146139	0.000925181	0.00119328	0.00201939	0.000414018	0.0012167			0.0218471	0.0199316		0.00119328	0.0012167
NM_011368	450	163	165	164	200	250	225		504	820	662	630	443	536.5		0.0219795	0.0233546	0.022667	0.0332116	0.023596	0.0284038		0.00105521	0.00106852	0.00106187	0.00162066	0.000639059	0.00112986			0.022667	0.0284038		0.00106187	0.00112986
NM_011870	172	124	178	151	101	288	194.5		582	1197	889.5	648	426	537		0.0167206	0.0251946	0.0209576	0.0167718	0.0271826	0.0219772		0.00121852	0.00155978	0.00138915	0.00166696	0.000614535	0.00114075			0.0209576	0.0219772		0.00138915	0.00114075
NM_028836	293	302	177	239.5	223	223	223		536	713	624.5	585	491	538		0.0407228	0.0250531	0.0328879	0.0370309	0.0210477	0.0290393		0.00112221	0.000929091	0.00102565	0.0015049	0.000708302	0.0011066			0.0328879	0.0290393		0.00102565	0.0011066
NM_001009818	410	537	658	597.5	616	779	697.5		180	1192	686	315	761	538		0.072411	0.0931352	0.0827731	0.102292	0.0735252	0.0879084		0.000376862	0.00155326	0.000965062	0.000810329	0.0010978	0.000954063			0.0827731	0.0879084		0.000965062	0.000954063
NM_013770	268	164	212	188	163	132	147.5		719	809	764	763	314	538.5		0.0221143	0.0300071	0.0260607	0.0270674	0.0124587	0.0197631		0.00150535	0.00105419	0.00127977	0.0019628	0.000452967	0.00120788			0.0260607	0.0197631		0.00127977	0.00120788
NM_178610	361	104	130	117	161	168	164.5		371	719	545	536	544	540		0.0140237	0.0184006	0.0162121	0.0267353	0.0158565	0.0212959		0.000776754	0.000936909	0.000856831	0.00137885	0.000784758	0.0010818			0.0162121	0.0212959		0.000856831	0.0010818
NM_016905	373	107	218	162.5	120	213	166.5		442	941	691.5	629	452	540.5		0.0144283	0.0308563	0.0226423	0.0199269	0.0201038	0.0200154		0.000925404	0.00122619	0.0010758	0.00161809	0.000652042	0.00113506			0.0226423	0.0200154		0.0010758	0.00113506
NM_052976	783	102	119	110.5	67	139	103		451	1225	838	334	747	540.5		0.013754	0.0168436	0.0152988	0.0111259	0.0131194	0.0121226		0.000944248	0.00159626	0.00127026	0.000859206	0.0010776	0.000968403			0.0152988	0.0121226		0.00127026	0.000968403
NM_019466	179	486	668	577	116	517	316.5		1656	1367	1511.5	424	657	540.5		0.065534	0.0945506	0.0800423	0.0192627	0.0487966	0.0340297		0.00346713	0.0017813	0.00262421	0.00109073	0.000947769	0.00101925			0.0800423	0.0340297		0.00262421	0.00101925
NM_174850	990	238	258	248	180	323	251.5		427	1046	736.5	414	668	541		0.0320928	0.036518	0.0343054	0.0298904	0.0304861	0.0301882		0.000893999	0.00136301	0.00112851	0.001065	0.000963637	0.00101432			0.0343054	0.0301882		0.00112851	0.00101432
NM_176893	1289	94	121	107.5	135	139	137		331	1259	795	345	737	541		0.0126753	0.0171267	0.014901	0.0224178	0.0131194	0.0177686		0.000693006	0.00164057	0.00116679	0.000887503	0.00106317	0.000975339			0.014901	0.0177686		0.00116679	0.000975339
NM_019434	1952	85	164	124.5	142	160	151		481	1580	1030.5	468	614	541		0.0114617	0.023213	0.0173374	0.0235802	0.0151015	0.0193408		0.00100706	0.00205885	0.00153296	0.00120392	0.000885738	0.00104483			0.0173374	0.0193408		0.00153296	0.00104483
NM_001042672	609	209	125	167	145	100	122.5		493	1801	1147	366	718	542		0.0281823	0.0176929	0.0229376	0.0240784	0.00943841	0.0167584		0.00103218	0.00234683	0.00168951	0.000941525	0.00103577	0.000988645			0.0229376	0.0167584		0.00168951	0.000988645
NM_019699	425	84	287	185.5	48	488	268		332	1199	765.5	245	840	542.5		0.0113269	0.0406228	0.0259748	0.00797077	0.0460595	0.0270151		0.0006951	0.00156238	0.00112874	0.000630256	0.00121176	0.000921008			0.0259748	0.0270151		0.00112874	0.000921008
NM_170758	299	425	248	336.5	421	383	402		521	716	618.5	608	479	543.5		0.0573085	0.0351026	0.0462056	0.0699103	0.0361491	0.0530297		0.0010908	0.000933	0.0010119	0.00156406	0.000690991	0.00112753			0.0462056	0.0530297		0.0010119	0.00112753
NM_001144987	652	100	145	122.5	101	176	138.5		379	972	675.5	462	626	544		0.0134844	0.0205237	0.017004	0.0167718	0.0166116	0.0166917		0.000793503	0.00126659	0.00103004	0.00118848	0.000903049	0.00104577			0.017004	0.0166917		0.00103004	0.00104577
NM_144895	652	100	145	122.5	101	176	138.5		379	972	675.5	462	626	544		0.0134844	0.0205237	0.017004	0.0167718	0.0166116	0.0166917		0.000793503	0.00126659	0.00103004	0.00118848	0.000903049	0.00104577			0.017004	0.0166917		0.00103004	0.00104577
NM_199007	1145	118	120	119	201	216	208.5		85	792	438.5	172	917	544.5		0.0159115	0.0169851	0.0164483	0.0333776	0.020387	0.0268823		0.000177962	0.00103203	0.000604998	0.000442465	0.00132284	0.000882651			0.0164483	0.0268823		0.000604998	0.000882651
NM_008638	331	265	225	245	337	230	283.5		361	596	478.5	585	504	544.5		0.0357335	0.0318471	0.0337903	0.0559615	0.0217084	0.0388349		0.000755817	0.000776631	0.000766224	0.0015049	0.000727056	0.00111598			0.0337903	0.0388349		0.000766224	0.00111598
NM_021472	129	412	285	348.5	336	422	379		521	636	578.5	421	668	544.5		0.0555556	0.0403397	0.0479476	0.0557954	0.0398301	0.0478128		0.0010908	0.000828754	0.000959779	0.00108301	0.000963637	0.00102332			0.0479476	0.0478128		0.000959779	0.00102332
NM_201239	129	412	285	348.5	336	422	379		521	636	578.5	421	668	544.5		0.0555556	0.0403397	0.0479476	0.0557954	0.0398301	0.0478128		0.0010908	0.000828754	0.000959779	0.00108301	0.000963637	0.00102332			0.0479476	0.0478128		0.000959779	0.00102332
NM_017397	806	101	122	111.5	156	150	153		406	1076	741	504	585	544.5		0.0136192	0.0172682	0.0154437	0.025905	0.0141576	0.0200313		0.000850032	0.00140211	0.00112607	0.00129653	0.000843904	0.00107022			0.0154437	0.0200313		0.00112607	0.00107022
NM_020603	603	103	161	132	143	191	167		662	896	779	579	510	544.5		0.0138889	0.0227884	0.0183386	0.0237463	0.0180274	0.0208868		0.00138601	0.00116755	0.00127678	0.00148946	0.000735711	0.00111259			0.0183386	0.0208868		0.00127678	0.00111259
NM_009974	331	257	224	240.5	244	489	366.5		233	879	556	314	777	545.5		0.0346548	0.0317056	0.0331802	0.0405181	0.0461538	0.043336		0.000487826	0.0011454	0.000816614	0.000807757	0.00112088	0.000964317			0.0331802	0.043336		0.000816614	0.000964317
NM_001142655	126	179	167	173	165	311	238		688	485	586.5	689	402	545.5		0.024137	0.0236377	0.0238873	0.0273995	0.0293535	0.0283765		0.00144045	0.00063199	0.00103622	0.00177243	0.000579913	0.00117617			0.0238873	0.0283765		0.00103622	0.00117617
NM_018858	168	257	443	350	210	662	436		309	897	603	301	790	545.5		0.0346548	0.0627035	0.0486791	0.0348721	0.0624823	0.0486772		0.000646946	0.00116886	0.000907901	0.000774314	0.00113963	0.000956973			0.0486791	0.0486772		0.000907901	0.000956973
NM_028023	218	112	138	125	105	151	128		471	946	708.5	593	498	545.5		0.0151025	0.0195329	0.0173177	0.0174361	0.014252	0.015844		0.000986121	0.00123271	0.00110941	0.00152548	0.0007184	0.00112194			0.0173177	0.015844		0.00110941	0.00112194
NM_021476	333	185	193	189	267	344	305.5		198	810	504	218	874	546		0.0249461	0.0273178	0.0261319	0.0443374	0.0324681	0.0384028		0.000414548	0.00105549	0.000735018	0.000560799	0.00126081	0.000910803			0.0261319	0.0384028		0.000735018	0.000910803
NM_175094	482	68	135	101.5	111	202	156.5		467	582	524.5	598	494	546		0.00916936	0.0191083	0.0141388	0.0184324	0.0190656	0.018749		0.000977746	0.000758388	0.000868067	0.00153834	0.00071263	0.00112548			0.0141388	0.018749		0.000868067	0.00112548
NM_019561	102	137	97	117	146	265	205.5		487	820	653.5	560	533	546.5		0.0184736	0.0137297	0.0161016	0.0242444	0.0250118	0.0246281		0.00101962	0.00106852	0.00104407	0.00144058	0.00076889	0.00110474			0.0161016	0.0246281		0.00104407	0.00110474
NM_030721	681	113	162	137.5	117	129	123		568	1236	902	530	563	546.5		0.0152373	0.0229299	0.0190836	0.0194288	0.0121756	0.0158022		0.00118921	0.0016106	0.0013999	0.00136341	0.000812167	0.00108779			0.0190836	0.0158022		0.0013999	0.00108779
NM_028057	286	170	169	169.5	143	237	190		565	728	646.5	596	498	547		0.0229234	0.0239207	0.0234221	0.0237463	0.022369	0.0230577		0.00118293	0.000948637	0.00106578	0.00153319	0.0007184	0.0011258			0.0234221	0.0230577		0.00106578	0.0011258
NM_153058	307	243	421	332	217	566	391.5		200	1341	770.5	229	865	547		0.032767	0.0595895	0.0461783	0.0360345	0.0534214	0.044728		0.000418735	0.00174742	0.00108308	0.000589096	0.00124782	0.00091846			0.0461783	0.044728		0.00108308	0.00091846
NM_001159606	925	217	302	259.5	238	298	268		405	1966	1185.5	423	671	547		0.0292611	0.0427459	0.0360035	0.0395218	0.0281265	0.0338241		0.000847938	0.00256184	0.00170489	0.00108816	0.000967965	0.00102806			0.0360035	0.0338241		0.00170489	0.00102806
NM_172253	311	163	129	146	123	119	121		230	1033	631.5	239	856	547.5		0.0219795	0.018259	0.0201193	0.0204251	0.0112317	0.0158284		0.000481545	0.00134607	0.00091381	0.000614821	0.00123484	0.000924831			0.0201193	0.0158284		0.00091381	0.000924831
NM_001253700	149	76	145	110.5	84	162	123		246	662	454	332	764	548		0.0102481	0.0205237	0.0153859	0.0139489	0.0152902	0.0146195		0.000515044	0.000862634	0.000688839	0.000854061	0.00110212	0.000978092			0.0153859	0.0146195		0.000688839	0.000978092
NM_134103	341	128	99	113.5	129	147	138		347	615	481	455	641	548		0.01726	0.0140127	0.0156364	0.0214215	0.0138745	0.017648		0.000726505	0.00080139	0.000763947	0.00117048	0.000924688	0.00104758			0.0156364	0.017648		0.000763947	0.00104758
NM_001163310	164	115	104	109.5	166	133	149.5		320	829	574.5	550	546	548		0.015507	0.0147205	0.0151137	0.0275656	0.0125531	0.0200593		0.000669976	0.00108025	0.000875112	0.00141486	0.000787644	0.00110125			0.0151137	0.0200593		0.000875112	0.00110125
NM_016713	1281	90	123	106.5	136	140	138		334	1267	800.5	342	754	548		0.0121359	0.0174098	0.0147728	0.0225839	0.0132138	0.0178988		0.000699288	0.00165099	0.00117514	0.000879786	0.0010877	0.000983742			0.0147728	0.0178988		0.00117514	0.000983742
NM_016957	71	200	348	274	316	676	496		370	326	348	603	494	548.5		0.0269687	0.0492569	0.0381128	0.0524743	0.0638037	0.058139		0.00077466	0.000424802	0.000599731	0.0015512	0.00071263	0.00113192			0.0381128	0.058139		0.000599731	0.00113192
NM_028292	367	173	291	232	231	205	218		562	730	646	824	273	548.5		0.0233279	0.041189	0.0322584	0.0383593	0.0193487	0.028854		0.00117665	0.000951243	0.00106394	0.00211972	0.000393822	0.00125677			0.0322584	0.028854		0.00106394	0.00125677
NM_134020	208	184	217	200.5	145	327	236		712	612	662	748	349	548.5		0.0248112	0.0307148	0.027763	0.0240784	0.0308636	0.027471		0.0014907	0.00079748	0.00114409	0.00192421	0.000503457	0.00121383			0.027763	0.027471		0.00114409	0.00121383
NM_145404	673	135	140	137.5	115	135	125		500	822	661	551	547	549		0.0182039	0.019816	0.0190099	0.0190966	0.0127419	0.0159193		0.00104684	0.00107113	0.00105898	0.00141743	0.000789086	0.00110326			0.0190099	0.0159193		0.00105898	0.00110326
NM_007513	603	383	283	333	396	170	283		703	1733	1218	591	507	549		0.0516451	0.0400566	0.0458509	0.0657589	0.0160453	0.0409021		0.00147185	0.00225822	0.00186504	0.00152033	0.000731383	0.00112586			0.0458509	0.0409021		0.00186504	0.00112586
NM_030724	242	147	71	109	134	63	98.5		533	547	540	842	257	549.5		0.019822	0.0100495	0.0149358	0.0222517	0.0059462	0.014099		0.00111593	0.000712781	0.000914355	0.00216602	0.000370741	0.00126838			0.0149358	0.014099		0.000914355	0.00126838
NM_018818	643	173	182	177.5	172	195	183.5		282	1147	714.5	284	815	549.5		0.0233279	0.0257608	0.0245444	0.0285619	0.0184049	0.0234834		0.000590416	0.00149462	0.00104252	0.000730582	0.00117569	0.000953139			0.0245444	0.0234834		0.00104252	0.000953139
NM_146055	903	139	137	138	141	176	158.5		501	1028	764.5	586	513	549.5		0.0187433	0.0193914	0.0190673	0.0234141	0.0166116	0.0200129		0.00104893	0.00133956	0.00119424	0.00150747	0.000740039	0.00112375			0.0190673	0.0200129		0.00119424	0.00112375
NM_028835	679	157	182	169.5	161	199	180		736	1057	896.5	686	413	549.5		0.0211704	0.0257608	0.0234656	0.0267353	0.0187824	0.0227589		0.00154094	0.00137735	0.00145915	0.00176472	0.000595782	0.00118025			0.0234656	0.0227589		0.00145915	0.00118025
NM_001253718	679	157	182	169.5	161	199	180		736	1057	896.5	686	413	549.5		0.0211704	0.0257608	0.0234656	0.0267353	0.0187824	0.0227589		0.00154094	0.00137735	0.00145915	0.00176472	0.000595782	0.00118025			0.0234656	0.0227589		0.00145915	0.00118025
NM_001024206	126	95	214	154.5	94	206	150		416	844	630	431	669	550		0.0128101	0.0302902	0.0215502	0.0156094	0.0194431	0.0175263		0.000870969	0.00109979	0.000985381	0.00110874	0.00096508	0.00103691			0.0215502	0.0175263		0.000985381	0.00103691
NM_001195205	555	96	180	138	112	148	130		609	814	711.5	733	367	550		0.012945	0.0254777	0.0192113	0.0185985	0.0139689	0.0162837		0.00127505	0.0010607	0.00116787	0.00188562	0.000529423	0.00120752			0.0192113	0.0162837		0.00116787	0.00120752
NM_001167829	331	162	219	190.5	196	230	213		332	1184	758	330	770	550		0.0218447	0.0309979	0.0264213	0.0325473	0.0217084	0.0271278		0.0006951	0.00154284	0.00111897	0.000848916	0.00111078	0.000979848			0.0264213	0.0271278		0.00111897	0.000979848
NM_025340	361	100	142	121	76	177	126.5		515	561	538	619	482	550.5		0.0134844	0.0200991	0.0167917	0.0126204	0.016706	0.0146632		0.00107824	0.000731024	0.000904633	0.00159236	0.000695319	0.00114384			0.0167917	0.0146632		0.000904633	0.00114384
NM_001039352	683	376	454	415	393	617	505		441	644	542.5	669	432	550.5		0.0507012	0.0642604	0.0574808	0.0652607	0.058235	0.0617479		0.000923311	0.000839179	0.000881245	0.00172098	0.00062319	0.00117209			0.0574808	0.0617479		0.000881245	0.00117209
NM_010329	153	263	148	205.5	336	144	240		508	806	657	776	325	550.5		0.0354639	0.0209483	0.0282061	0.0557954	0.0135913	0.0346934		0.00106359	0.00105028	0.00105693	0.00199624	0.000468835	0.00123254			0.0282061	0.0346934		0.00105693	0.00123254
NM_178811	778	104	176	140	122	161	141.5		473	1196	834.5	394	707	550.5		0.0140237	0.0249115	0.0194676	0.0202591	0.0151958	0.0177274		0.000990308	0.00155847	0.00127439	0.00101355	0.0010199	0.00101673			0.0194676	0.0177274		0.00127439	0.00101673
NM_001161410	778	104	176	140	122	161	141.5		473	1196	834.5	394	707	550.5		0.0140237	0.0249115	0.0194676	0.0202591	0.0151958	0.0177274		0.000990308	0.00155847	0.00127439	0.00101355	0.0010199	0.00101673			0.0194676	0.0177274		0.00127439	0.00101673
NM_001001881	229	156	81	118.5	63	63	63		671	1145	908	621	481	551		0.0210356	0.011465	0.0162503	0.0104616	0.0059462	0.00820392		0.00140486	0.00149202	0.00144844	0.00159751	0.000693876	0.00114569			0.0162503	0.00820392		0.00144844	0.00114569
NM_207231	160	308	321	314.5	104	209	156.5		1567	1274	1420.5	666	437	551.5		0.0415318	0.0454352	0.0434835	0.01727	0.0197263	0.0184981		0.00328079	0.00166011	0.00247045	0.00171327	0.000630403	0.00117184			0.0434835	0.0184981		0.00247045	0.00117184
NM_139064	411	105	139	122	145	124	134.5		705	463	584	880	224	552		0.0141586	0.0196745	0.0169165	0.0240784	0.0117036	0.017891		0.00147604	0.000603323	0.00103968	0.00226378	0.000323136	0.00129346			0.0169165	0.017891		0.00103968	0.00129346
NM_001164358	482	138	136	137	59	88	73.5		1051	1309	1180	683	421	552		0.0186084	0.0192498	0.0189291	0.00979741	0.0083058	0.00905161		0.00220045	0.00170572	0.00195309	0.001757	0.000607322	0.00118216			0.0189291	0.00905161		0.00195309	0.00118216
NM_020483	289	111	176	143.5	122	258	190		682	430	556	715	392	553.5		0.0149676	0.0249115	0.0199396	0.0202591	0.0243511	0.0223051		0.00142789	0.000560321	0.000994104	0.00183932	0.000565488	0.0012024			0.0199396	0.0223051		0.000994104	0.0012024
NM_198023	363	148	93	120.5	158	207	182.5		152	972	562	283	825	554		0.0199569	0.0131635	0.0165602	0.0262371	0.0195375	0.0228873		0.000318239	0.00126659	0.000792413	0.00072801	0.00119012	0.000959065			0.0165602	0.0228873		0.000792413	0.000959065
NM_029295	133	134	136	135	109	145	127		703	441	572	715	393	554		0.018069	0.0192498	0.0186594	0.0181003	0.0136857	0.015893		0.00147185	0.000574655	0.00102325	0.00183932	0.00056693	0.00120312			0.0186594	0.015893		0.00102325	0.00120312
NM_026430	401	216	121	168.5	143	192	167.5		537	732	634.5	488	621	554.5		0.0291262	0.0171267	0.0231264	0.0237463	0.0181218	0.020934		0.0011243	0.000953849	0.00103908	0.00125537	0.000895836	0.0010756			0.0231264	0.020934		0.00103908	0.0010756
NM_001256380	1651	284	247	265.5	187	224	205.5		376	1802	1089	242	867	554.5		0.0382956	0.0349611	0.0366283	0.0310528	0.021142	0.0260974		0.000787222	0.00234814	0.00156768	0.000622538	0.00125071	0.000936624			0.0366283	0.0260974		0.00156768	0.000936624
NM_026776	157	186	282	234	206	324	265		407	998	702.5	460	651	555.5		0.0250809	0.0399151	0.032498	0.0342079	0.0305805	0.0323942		0.000852126	0.00130047	0.0010763	0.00118334	0.000939113	0.00106123			0.032498	0.0323942		0.0010763	0.00106123
NM_198163	182	179	252	215.5	209	358	283.5		434	698	566	548	564	556		0.024137	0.0356688	0.0299029	0.0347061	0.0337895	0.0342478		0.000908655	0.000909545	0.0009091	0.00140972	0.00081361	0.00111166			0.0299029	0.0342478		0.0009091	0.00111166
NM_026887	141	128	95	111.5	95	140	117.5		431	761	596	406	706	556		0.01726	0.0134466	0.0153533	0.0157755	0.0132138	0.0144946		0.000902374	0.000991638	0.000947006	0.00104442	0.00101845	0.00103144			0.0153533	0.0144946		0.000947006	0.00103144
NM_019923	2682	144	106	125	130	113	121.5		535	797	666	548	564	556		0.0194175	0.0150035	0.0172105	0.0215875	0.0106654	0.0161265		0.00112012	0.00103855	0.00107933	0.00140972	0.00081361	0.00111166			0.0172105	0.0161265		0.00107933	0.00111166
NM_001013380	473	273	290	281.5	332	335	333.5		430	1103	766.5	427	685	556		0.0368123	0.0410474	0.0389299	0.0551312	0.0316187	0.0433749		0.00090028	0.00143729	0.00116878	0.00109845	0.000988161	0.0010433			0.0389299	0.0433749		0.00116878	0.0010433
NM_001081549	232	470	605	537.5	114	473	293.5		1666	1389	1527.5	436	676	556		0.0633765	0.0856334	0.0745049	0.0189306	0.0446437	0.0317871		0.00348806	0.00180997	0.00264902	0.0011216	0.000975178	0.00104839			0.0745049	0.0317871		0.00264902	0.00104839
NM_054097	402	137	92	114.5	107	187	147		462	654	558	471	642	556.5		0.0184736	0.0130219	0.0157478	0.0177682	0.0176498	0.017709		0.000967278	0.000852209	0.000909744	0.00121163	0.00092613	0.00106888			0.0157478	0.017709		0.000909744	0.00106888
NM_172937	1597	108	139	123.5	140	118	129		243	1564	903.5	283	830	556.5		0.0145631	0.0196745	0.0171188	0.0232481	0.0111373	0.0171927		0.000508763	0.00203801	0.00127338	0.00072801	0.00119733	0.000962672			0.0171188	0.0171927		0.00127338	0.000962672
NM_001253717	722	157	186	171.5	161	200	180.5		743	1065	904	699	415	557		0.0211704	0.026327	0.0237487	0.0267353	0.0188768	0.0228061		0.0015556	0.00138777	0.00147169	0.00179816	0.000598667	0.00119841			0.0237487	0.0228061		0.00147169	0.00119841
NM_023063	574	103	207	155	89	240	164.5		257	1163	710	393	722	557.5		0.0138889	0.0292994	0.0215941	0.0147791	0.0226522	0.0187157		0.000538075	0.00151547	0.00102677	0.00101098	0.00104154	0.00102626			0.0215941	0.0187157		0.00102677	0.00102626
NM_177594	526	168	142	155	217	230	223.5		359	949	654	467	650	558.5		0.0226537	0.0200991	0.0213764	0.0360345	0.0217084	0.0288714		0.000751629	0.00123662	0.000994123	0.00120134	0.000937671	0.00106951			0.0213764	0.0288714		0.000994123	0.00106951
NM_013528	662	245	321	283	275	259	267		305	1605	955	490	627	558.5		0.0330367	0.0454352	0.039236	0.0456659	0.0244455	0.0350557		0.000638571	0.00209143	0.001365	0.00126051	0.000904492	0.0010825			0.039236	0.0350557		0.001365	0.0010825
NM_025700	601	146	218	182	152	205	178.5		509	1416	962.5	530	587	558.5		0.0196872	0.0308563	0.0252717	0.0252408	0.0193487	0.0222948		0.00106568	0.00184515	0.00145542	0.00136341	0.000846789	0.0011051			0.0252717	0.0222948		0.00145542	0.0011051
NM_001081214	1625	202	239	220.5	200	195	197.5		499	2091	1295	499	618	558.5		0.0272384	0.0338287	0.0305336	0.0332116	0.0184049	0.0258082		0.00104474	0.00272472	0.00188473	0.00128366	0.000891509	0.00108759			0.0305336	0.0258082		0.00188473	0.00108759
NM_025937	396	128	78	103	114	183	148.5		313	568	440.5	438	680	559		0.01726	0.0110403	0.0141502	0.0189306	0.0172723	0.0181014		0.00065532	0.000740145	0.000697733	0.00112674	0.000980948	0.00105385			0.0141502	0.0181014		0.000697733	0.00105385
NM_008080	514	150	90	120	148	160	154		638	819	728.5	725	394	559.5		0.0202265	0.0127389	0.0164827	0.0245766	0.0151015	0.019839		0.00133576	0.00106722	0.00120149	0.00186504	0.000568373	0.00121671			0.0164827	0.019839		0.00120149	0.00121671
NM_173032	743	143	130	136.5	123	165	144		282	1226	754	261	858	559.5		0.0192826	0.0184006	0.0188416	0.0204251	0.0155734	0.0179992		0.000590416	0.00159757	0.00109399	0.000671415	0.00123773	0.00095457			0.0188416	0.0179992		0.00109399	0.00095457
NM_178113	1487	188	144	166	168	124	146		552	1396	974	560	559	559.5		0.0253506	0.0203822	0.0228664	0.0278977	0.0117036	0.0198007		0.00115571	0.00181909	0.0014874	0.00144058	0.000806397	0.00112349			0.0228664	0.0198007		0.0014874	0.00112349
NM_025366	99	81	129	105	65	275	170		507	708	607.5	458	662	560		0.0109223	0.018259	0.0145907	0.0107938	0.0259556	0.0183747		0.00106149	0.000922575	0.000992034	0.00117819	0.000954982	0.00106659			0.0145907	0.0183747		0.000992034	0.00106659
NM_001159553	154	66	147	106.5	60	235	147.5		818	652	735	720	400	560		0.00889968	0.0208068	0.0148532	0.00996347	0.0221803	0.0160719		0.00171263	0.000849603	0.00128111	0.00185218	0.000577028	0.0012146			0.0148532	0.0160719		0.00128111	0.0012146
NM_001038999	1145	108	92	100	113	129	121		500	1153	826.5	318	802	560		0.0145631	0.0130219	0.0137925	0.0187645	0.0121756	0.01547		0.00104684	0.00150244	0.00127464	0.000818046	0.00115694	0.000987494			0.0137925	0.01547		0.00127464	0.000987494
NM_153547	519	339	241	290	297	243	270		652	1389	1020.5	546	574	560		0.045712	0.0341118	0.0399119	0.0493192	0.0229353	0.0361273		0.00136508	0.00180997	0.00158752	0.00140457	0.000828035	0.0011163			0.0399119	0.0361273		0.00158752	0.0011163
NM_133889	408	200	168	184	133	222	177.5		650	789	719.5	622	499	560.5		0.0269687	0.0237792	0.025374	0.0220857	0.0209533	0.0215195		0.00136089	0.00102812	0.00119451	0.00160008	0.000719843	0.00115996			0.025374	0.0215195		0.00119451	0.00115996
NM_146001	1010	70	197	133.5	37	167	102		430	1597	1013.5	334	787	560.5		0.00943905	0.0278839	0.0186615	0.00614414	0.0157622	0.0109531		0.00090028	0.00208101	0.00149064	0.000859206	0.0011353	0.000997254			0.0186615	0.0109531		0.00149064	0.000997254
NM_001163314	903	98	136	117	74	328	201		171	680	425.5	167	955	561		0.0132147	0.0192498	0.0162322	0.0122883	0.030958	0.0216231		0.000358018	0.000886089	0.000622054	0.000429603	0.00137765	0.000903629			0.0162322	0.0216231		0.000622054	0.000903629
NM_175423	285	145	207	176	169	289	229		437	733	585	642	480	561		0.0195523	0.0292994	0.0244258	0.0280638	0.027277	0.0276704		0.000914936	0.000955152	0.000935044	0.00165153	0.000692434	0.00117198			0.0244258	0.0276704		0.000935044	0.00117198
NM_145954	783	114	123	118.5	106	125	115.5		687	880	783.5	749	373	561		0.0153722	0.0174098	0.016391	0.0176021	0.011798	0.0147001		0.00143835	0.0011467	0.00129253	0.00192678	0.000538079	0.00123243			0.016391	0.0147001		0.00129253	0.00123243
NM_016723	211	105	101	103	87	143	115		353	745	549	449	674	561.5		0.0141586	0.0142958	0.0142272	0.014447	0.0134969	0.013972		0.000739067	0.000970789	0.000854928	0.00115504	0.000972293	0.00106367			0.0142272	0.013972		0.000854928	0.00106367
NM_027739	550	155	101	128	149	169	159		638	824	731	729	394	561.5		0.0209008	0.0142958	0.0175983	0.0247426	0.0159509	0.0203468		0.00133576	0.00107373	0.00120475	0.00187533	0.000568373	0.00122185			0.0175983	0.0203468		0.00120475	0.00122185
NM_053086	682	375	454	414.5	392	617	504.5		466	646	556	688	436	562		0.0505663	0.0642604	0.0574134	0.0650947	0.058235	0.0616648		0.000975653	0.000841785	0.000908719	0.00176986	0.000628961	0.00119941			0.0574134	0.0616648		0.000908719	0.00119941
NM_028767	653	229	159	194	239	361	300		285	1460	872.5	237	887	562		0.0308792	0.0225053	0.0266922	0.0396878	0.0340727	0.0368802		0.000596697	0.00190249	0.00124959	0.000609676	0.00127956	0.000944618			0.0266922	0.0368802		0.00124959	0.000944618
NM_178376	294	395	454	424.5	373	480	426.5		363	1024	693.5	448	677	562.5		0.0532632	0.0642604	0.0587618	0.0619396	0.0453044	0.053622		0.000760004	0.00133435	0.00104718	0.00115247	0.00097662	0.00106454			0.0587618	0.053622		0.00104718	0.00106454
NM_008012	297	250	393	321.5	200	431	315.5		635	863	749	630	495	562.5		0.0337109	0.0556263	0.0446686	0.0332116	0.0406796	0.0369456		0.00132948	0.00112455	0.00122702	0.00162066	0.000714072	0.00116737			0.0446686	0.0369456		0.00122702	0.00116737
NM_025875	154	220	210	215	244	412	328		398	469	433.5	484	642	563		0.0296656	0.029724	0.0296948	0.0405181	0.0388863	0.0397022		0.000833283	0.000611141	0.000722212	0.00124508	0.00092613	0.0010856			0.0296948	0.0397022		0.000722212	0.0010856
NM_148926	186	208	197	202.5	137	240	188.5		763	655	709	699	427	563		0.0280475	0.0278839	0.0279657	0.0227499	0.0226522	0.0227011		0.00159747	0.000853512	0.00122549	0.00179816	0.000615978	0.00120707			0.0279657	0.0227011		0.00122549	0.00120707
NM_001110824	666	231	159	195	235	352	293.5		285	1467	876	237	889	563		0.0311489	0.0225053	0.0268271	0.0390236	0.0332232	0.0361234		0.000596697	0.00191161	0.00125415	0.000609676	0.00128245	0.000946061			0.0268271	0.0361234		0.00125415	0.000946061
NM_001110825	654	231	160	195.5	241	361	301		285	1470	877.5	237	889	563		0.0311489	0.0226469	0.0268979	0.0400199	0.0340727	0.0370463		0.000596697	0.00191552	0.00125611	0.000609676	0.00128245	0.000946061			0.0268979	0.0370463		0.00125611	0.000946061
NM_001165948	1381	140	154	147	182	228	205		358	1404	881	251	878	564.5		0.0188781	0.0217976	0.0203378	0.0302225	0.0215196	0.0258711		0.000749536	0.00182951	0.00128952	0.000645691	0.00126658	0.000956134			0.0203378	0.0258711		0.00128952	0.000956134
NM_026936	414	163	273	218	178	250	214		537	1049	793	558	572	565		0.0219795	0.0386412	0.0303103	0.0295583	0.023596	0.0265772		0.0011243	0.00136692	0.00124561	0.00143544	0.00082515	0.0011303			0.0303103	0.0265772		0.00124561	0.0011303
NM_001145902	460	267	442	354.5	288	426	357		458	1137	797.5	535	595	565		0.0360032	0.0625619	0.0492826	0.0478246	0.0402076	0.0440161		0.000958903	0.00148159	0.00122025	0.00137627	0.000858329	0.0011173			0.0492826	0.0440161		0.00122025	0.0011173
NM_153525	272	148	152	150	133	257	195		495	855	675	427	704	565.5		0.0199569	0.0215145	0.0207357	0.0220857	0.0242567	0.0231712		0.00103637	0.00111413	0.00107525	0.00109845	0.00101557	0.00105701			0.0207357	0.0231712		0.00107525	0.00105701
NM_011159	4109	130	144	137	70	133	101.5		485	1842	1163.5	214	917	565.5		0.0175297	0.0203822	0.0189559	0.011624	0.0125531	0.0120886		0.00101543	0.00240026	0.00170785	0.000550509	0.00132284	0.000936673			0.0189559	0.0120886		0.00170785	0.000936673
NM_001048250	55	104	150	127	122	122	122		447	931	689	546	586	566		0.0140237	0.0212314	0.0176276	0.0202591	0.0115149	0.015887		0.000935873	0.00121316	0.00107452	0.00140457	0.000845346	0.00112496			0.0176276	0.015887		0.00107452	0.00112496
NM_028298	522	167	112	139.5	108	140	124		277	1433	855	203	929	566		0.0225189	0.0158528	0.0191858	0.0179342	0.0132138	0.015574		0.000579948	0.0018673	0.00122363	0.000522212	0.00134015	0.00093118			0.0191858	0.015574		0.00122363	0.00093118
NM_197993	850	99	112	105.5	92	120	106		798	989	893.5	808	324	566		0.0133495	0.0158528	0.0146012	0.0152773	0.0113261	0.0133017		0.00167075	0.00128874	0.00147975	0.00207856	0.000467393	0.00127298			0.0146012	0.0133017		0.00147975	0.00127298
NM_021354	345	193	276	234.5	195	303	249		673	1155	914	620	512	566		0.0260248	0.0390658	0.0325453	0.0323813	0.0285984	0.0304898		0.00140904	0.00150505	0.00145705	0.00159493	0.000738596	0.00116676			0.0325453	0.0304898		0.00145705	0.00116676
NM_001159572	289	395	269	332	300	317	308.5		836	1253	1044.5	641	491	566		0.0532632	0.038075	0.0456691	0.0498173	0.0299198	0.0398686		0.00175031	0.00163275	0.00169153	0.00164896	0.000708302	0.00117863			0.0456691	0.0398686		0.00169153	0.00117863
NM_001164220	388	146	81	113.5	122	142	132		360	878	619	341	792	566.5		0.0196872	0.011465	0.0155761	0.0202591	0.0134025	0.0168308		0.000753723	0.0011441	0.00094891	0.000877213	0.00114252	0.00100986			0.0155761	0.0168308		0.00094891	0.00100986
NM_023233	388	146	81	113.5	122	142	132		360	878	619	341	792	566.5		0.0196872	0.011465	0.0155761	0.0202591	0.0134025	0.0168308		0.000753723	0.0011441	0.00094891	0.000877213	0.00114252	0.00100986			0.0155761	0.0168308		0.00094891	0.00100986
NM_172683	1390	141	158	149.5	182	229	205.5		358	1404	881	251	882	566.5		0.0190129	0.0223638	0.0206884	0.0302225	0.021614	0.0259182		0.000749536	0.00182951	0.00128952	0.000645691	0.00127235	0.000959019			0.0206884	0.0259182		0.00128952	0.000959019
NM_183208	1053	392	539	465.5	420	913	666.5		119	1527	823	162	972	567		0.0528587	0.0762916	0.0645751	0.0697443	0.0861727	0.0779585		0.000249147	0.00198979	0.00111947	0.000416741	0.00140218	0.00090946			0.0645751	0.0779585		0.00111947	0.00090946
NM_053272	497	141	183	162	99	192	145.5		558	1691	1124.5	391	745	568		0.0190129	0.0259023	0.0224576	0.0164397	0.0181218	0.0172807		0.00116827	0.0022035	0.00168588	0.00100584	0.00107472	0.00104028			0.0224576	0.0172807		0.00168588	0.00104028
NM_023479	812	143	151	147	98	147	122.5		613	1048	830.5	666	472	569		0.0192826	0.021373	0.0203278	0.0162737	0.0138745	0.0150741		0.00128342	0.00136562	0.00132452	0.00171327	0.000680893	0.00119708			0.0203278	0.0150741		0.00132452	0.00119708
NM_009294	279	129	93	111	226	212	219		491	622	556.5	650	489	569.5		0.0173948	0.0131635	0.0152792	0.0375291	0.0200094	0.0287692		0.00102799	0.000810511	0.000919253	0.00167211	0.000705417	0.00118876			0.0152792	0.0287692		0.000919253	0.00118876
NM_153743	670	85	117	101	54	268	161		293	952	622.5	272	867	569.5		0.0114617	0.0165605	0.0140111	0.00896712	0.025295	0.017131		0.000613447	0.00124053	0.000926986	0.000699713	0.00125071	0.000975211			0.0140111	0.017131		0.000926986	0.000975211
NM_028732	290	409	273	341	300	322	311		844	1248	1046	644	495	569.5		0.055151	0.0386412	0.0468961	0.0498173	0.0303917	0.0401045		0.00176706	0.00162623	0.00169665	0.00165667	0.000714072	0.00118537			0.0468961	0.0401045		0.00169665	0.00118537
NM_001122832	580	143	220	181.5	227	407	317		502	847	674.5	636	504	570		0.0192826	0.0311394	0.025211	0.0376951	0.0384143	0.0380547		0.00105102	0.0011037	0.00107736	0.00163609	0.000727056	0.00118157			0.025211	0.0380547		0.00107736	0.00118157
NM_176837	644	115	113	114	95	176	135.5		381	1165	773	308	832	570		0.015507	0.0159943	0.0157507	0.0157755	0.0166116	0.0161935		0.00079769	0.00151808	0.00115788	0.000792322	0.00120022	0.00099627			0.0157507	0.0161935		0.00115788	0.00099627
NM_010166	491	165	227	196	161	258	209.5		604	1287	945.5	473	667	570		0.0222492	0.0321302	0.0271897	0.0267353	0.0243511	0.0255432		0.00126458	0.00167705	0.00147082	0.00121678	0.000962195	0.00108949			0.0271897	0.0255432		0.00147082	0.00108949
NM_028793	454	143	167	155	145	249	197		176	935	555.5	175	966	570.5		0.0192826	0.0236377	0.0214601	0.0240784	0.0235017	0.02379		0.000368487	0.00121837	0.00079343	0.000450183	0.00139352	0.000921853			0.0214601	0.02379		0.00079343	0.000921853
NM_009945	64	233	533	383	196	961	578.5		382	750	566	533	608	570.5		0.0314186	0.0754423	0.0534304	0.0325473	0.0907032	0.0616252		0.000799784	0.000977304	0.000888544	0.00137113	0.000877083	0.00112411			0.0534304	0.0616252		0.000888544	0.00112411
NM_023402	153	1409	2061	1735	1272	3064	2168		650	580	615	645	496	570.5		0.189995	0.29172	0.240857	0.211226	0.289193	0.250209		0.00136089	0.000755782	0.00105834	0.00165925	0.000715515	0.00118738			0.240857	0.250209		0.00105834	0.00118738
NM_001113331	560	163	167	165	200	254	227		521	870	695.5	672	469	570.5		0.0219795	0.0236377	0.0228086	0.0332116	0.0239736	0.0285926		0.0010908	0.00113367	0.00111224	0.0017287	0.000676566	0.00120263			0.0228086	0.0285926		0.00111224	0.00120263
NM_146226	713	150	245	197.5	133	258	195.5		460	1051	755.5	589	552	570.5		0.0202265	0.034678	0.0274523	0.0220857	0.0243511	0.0232184		0.000963091	0.00136953	0.00116631	0.00151519	0.000796299	0.00115574			0.0274523	0.0232184		0.00116631	0.00115574
NM_138651	425	158	156	157	208	240	224		415	1004	709.5	510	633	571.5		0.0213053	0.0220807	0.021693	0.03454	0.0226522	0.0285961		0.000868875	0.00130828	0.00108858	0.00131196	0.000913147	0.00111255			0.021693	0.0285961		0.00108858	0.00111255
NM_011817	140	261	247	254	9	376	192.5		1409	1114	1261.5	162	982	572		0.0351942	0.0349611	0.0350776	0.00149452	0.0354884	0.0184915		0.00294999	0.00145162	0.00220081	0.000416741	0.0014166	0.000916672			0.0350776	0.0184915		0.00220081	0.000916672
NM_001037747	517	123	127	125	182	137	159.5		587	547	567	847	298	572.5		0.0165858	0.0179759	0.0172808	0.0302225	0.0129306	0.0215766		0.00122899	0.000712781	0.000970884	0.00217888	0.000429886	0.00130439			0.0172808	0.0215766		0.000970884	0.00130439
NM_016763	242	132	157	144.5	154	180	167		592	970	781	609	536	572.5		0.0177994	0.0222222	0.0200108	0.0255729	0.0169891	0.021281		0.00123946	0.00126398	0.00125172	0.00156664	0.000773218	0.00116993			0.0200108	0.021281		0.00125172	0.00116993
NM_001081355	1690	284	250	267	188	231	209.5		382	1851	1116.5	251	894	572.5		0.0382956	0.0353857	0.0368406	0.0312189	0.0218027	0.0265108		0.000799784	0.00241199	0.00160589	0.000645691	0.00128966	0.000967674			0.0368406	0.0265108		0.00160589	0.000967674
NM_001102436	453	143	167	155	145	247	196		178	931	554.5	176	970	573		0.0192826	0.0236377	0.0214601	0.0240784	0.0233129	0.0236956		0.000372674	0.00121316	0.000792917	0.000452755	0.00139929	0.000926024			0.0214601	0.0236956		0.000792917	0.000926024
NM_133345	229	65	159	112	64	177	120.5		474	686	580	687	459	573		0.00876483	0.0225053	0.0156351	0.0106277	0.016706	0.0136668		0.000992402	0.000893908	0.000943155	0.00176729	0.00066214	0.00121471			0.0156351	0.0136668		0.000943155	0.00121471
NM_011989	624	162	117	139.5	209	130	169.5		634	1162	898	792	354	573		0.0218447	0.0165605	0.0192026	0.0347061	0.0122699	0.023488		0.00132739	0.00151417	0.00142078	0.0020374	0.00051067	0.00127403			0.0192026	0.023488		0.00142078	0.00127403
NM_210071	507	168	232	200	162	267	214.5		605	1293	949	473	674	573.5		0.0226537	0.0328379	0.0277458	0.0269014	0.0252006	0.026051		0.00126667	0.00168487	0.00147577	0.00121678	0.000972293	0.00109454			0.0277458	0.026051		0.00147577	0.00109454
NM_026312	179	107	127	117	73	207	140		268	647	457.5	273	875	574		0.0144283	0.0179759	0.0162021	0.0121222	0.0195375	0.0158299		0.000561105	0.000843088	0.000702096	0.000702285	0.00126225	0.000982267			0.0162021	0.0158299		0.000702096	0.000982267
NM_177266	760	93	119	106	119	133	126		403	819	611	609	540	574.5		0.0125405	0.0168436	0.014692	0.0197609	0.0125531	0.016157		0.000843751	0.00106722	0.000955484	0.00156664	0.000778988	0.00117281			0.014692	0.016157		0.000955484	0.00117281
NM_019774	668	117	154	135.5	120	216	168		684	1033	858.5	576	573	574.5		0.0157767	0.0217976	0.0187871	0.0199269	0.020387	0.020157		0.00143207	0.00134607	0.00138907	0.00148174	0.000826593	0.00115417			0.0187871	0.020157		0.00138907	0.00115417
NM_001077687	2558	102	127	114.5	172	124	148		360	1247	803.5	392	759	575.5		0.013754	0.0179759	0.015865	0.0285619	0.0117036	0.0201328		0.000753723	0.00162493	0.00118933	0.00100841	0.00109491	0.00105166			0.015865	0.0201328		0.00118933	0.00105166
NM_013895	76	54	169	111.5	43	193	118		542	595	568.5	880	272	576		0.00728155	0.0239207	0.0156011	0.00714048	0.0182161	0.0126783		0.00113477	0.000775328	0.00095505	0.00226378	0.000392379	0.00132808			0.0156011	0.0126783		0.00095505	0.00132808
NM_080463	374	221	143	182	185	167	176		606	899	752.5	642	510	576		0.0298004	0.0202406	0.0250205	0.0307207	0.0157622	0.0232414		0.00126877	0.00117146	0.00122011	0.00165153	0.000735711	0.00119362			0.0250205	0.0232414		0.00122011	0.00119362
NM_009458	133	272	323	297.5	230	512	371		354	886	620	313	841	577		0.0366775	0.0457183	0.0411979	0.0381933	0.0483247	0.043259		0.000741161	0.00115452	0.000947842	0.000805184	0.0012132	0.00100919			0.0411979	0.043259		0.000947842	0.00100919
NM_025707	552	123	156	139.5	156	179	167.5		263	1125	694	247	908	577.5		0.0165858	0.0220807	0.0193332	0.025905	0.0168948	0.0213999		0.000550637	0.00146596	0.0010083	0.000635401	0.00130985	0.000972627			0.0193332	0.0213999		0.0010083	0.000972627
NM_026352	351	154	153	153.5	137	200	168.5		470	755	612.5	448	709	578.5		0.0207659	0.0216561	0.021211	0.0227499	0.0188768	0.0208134		0.000984027	0.00098382	0.000983924	0.00115247	0.00102278	0.00108763			0.021211	0.0208134		0.000983924	0.00108763
NM_013841	551	91	148	119.5	99	177	138		396	975	685.5	556	601	578.5		0.0122708	0.0209483	0.0166096	0.0164397	0.016706	0.0165729		0.000829095	0.0012705	0.0010498	0.00143029	0.000866985	0.00114864			0.0166096	0.0165729		0.0010498	0.00114864
NM_001163769	220	291	387	339	414	783	598.5		425	259	342	861	297	579		0.0392395	0.0547771	0.0470083	0.0687479	0.0739028	0.0713254		0.000889812	0.000337496	0.000613654	0.0022149	0.000428443	0.00132167			0.0470083	0.0713254		0.000613654	0.00132167
NM_026826	124	166	292	229	244	431	337.5		520	580	550	633	525	579		0.022384	0.0413305	0.0318573	0.0405181	0.0406796	0.0405988		0.00108871	0.000755782	0.000922247	0.00162838	0.00075735	0.00119286			0.0318573	0.0405988		0.000922247	0.00119286
NM_024434	500	141	207	174	127	232	179.5		583	911	747	654	504	579		0.0190129	0.0292994	0.0241562	0.0210893	0.0218971	0.0214932		0.00122061	0.0011871	0.00120386	0.0016824	0.000727056	0.00120473			0.0241562	0.0214932		0.00120386	0.00120473
NM_001113545	734	106	216	161	100	276	188		280	1289	784.5	405	753	579		0.0142934	0.0305732	0.0224333	0.0166058	0.02605	0.0213279		0.000586229	0.00167966	0.00113294	0.00104185	0.00108626	0.00106405			0.0224333	0.0213279		0.00113294	0.00106405
NM_145836	756	168	220	194	150	237	193.5		478	1986	1232	427	731	579		0.0226537	0.0311394	0.0268966	0.0249087	0.022369	0.0236389		0.00100078	0.0025879	0.00179434	0.00109845	0.00105452	0.00107648			0.0268966	0.0236389		0.00179434	0.00107648
NM_001166629	94	260	482	371	248	652	450		611	750	680.5	708	451	579.5		0.0350593	0.0682236	0.0516415	0.0411823	0.0615385	0.0513604		0.00127924	0.000977304	0.00112827	0.00182131	0.000650599	0.00123596			0.0516415	0.0513604		0.00112827	0.00123596
NM_001045964	1325	98	122	110	139	141	140		337	1319	828	375	784	579.5		0.0132147	0.0172682	0.0152414	0.023082	0.0133082	0.0181951		0.000705569	0.00171875	0.00121216	0.000964677	0.00113098	0.00104783			0.0152414	0.0181951		0.00121216	0.00104783
NM_029546	900	170	260	215	185	136	160.5		712	1133	922.5	779	380	579.5		0.0229234	0.0368011	0.0298623	0.0307207	0.0128362	0.0217785		0.0014907	0.00147638	0.00148354	0.00200396	0.000548177	0.00127607			0.0298623	0.0217785		0.00148354	0.00127607
NM_008207	344	881	836	858.5	686	1638	1162		139	328	233.5	383	777	580		0.118797	0.11833	0.118563	0.113916	0.154601	0.134258		0.000291021	0.000427408	0.000359214	0.000985257	0.00112088	0.00105307			0.118563	0.134258		0.000359214	0.00105307
NM_001025577	351	333	454	393.5	539	744	641.5		126	1237	681.5	302	858	580		0.0449029	0.0642604	0.0545817	0.0895051	0.0702218	0.0798635		0.000263803	0.0016119	0.000937852	0.000776887	0.00123773	0.00100731			0.0545817	0.0798635		0.000937852	0.00100731
NM_001134426	216	293	119	206	353	216	284.5		504	440	472	743	418	580.5		0.0395092	0.0168436	0.0281764	0.0586184	0.020387	0.0395027		0.00105521	0.000573352	0.000814282	0.00191135	0.000602994	0.00125717			0.0281764	0.0395027		0.000814282	0.00125717
NM_007944	888	178	269	223.5	260	479	369.5		500	900	700	631	531	581		0.0240022	0.038075	0.0310386	0.043175	0.04521	0.0441925		0.00104684	0.00117277	0.0011098	0.00162323	0.000766005	0.00119462			0.0310386	0.0441925		0.0011098	0.00119462
NM_001113486	564	324	675	499.5	244	597	420.5		493	1718	1105.5	408	754	581		0.0436893	0.0955414	0.0696154	0.0405181	0.0563473	0.0484327		0.00103218	0.00223868	0.00163543	0.00104957	0.0010877	0.00106863			0.0696154	0.0484327		0.00163543	0.00106863
NM_172203	544	217	118	167.5	178	200	189		654	872	763	673	490	581.5		0.0292611	0.0167021	0.0229816	0.0295583	0.0188768	0.0242176		0.00136926	0.00113628	0.00125277	0.00173127	0.00070686	0.00121907			0.0229816	0.0242176		0.00125277	0.00121907
NM_001014976	2099	137	168	152.5	167	110	138.5		703	1489	1096	790	373	581.5		0.0184736	0.0237792	0.0211264	0.0277317	0.0103823	0.019057		0.00147185	0.00194027	0.00170606	0.00203225	0.000538079	0.00128517			0.0211264	0.019057		0.00170606	0.00128517
NM_028153	649	296	206	251	269	266	267.5		753	653	703	805	359	582		0.0399137	0.0291578	0.0345358	0.0446695	0.0251062	0.0348879		0.00157654	0.000850906	0.00121372	0.00207084	0.000517883	0.00129436			0.0345358	0.0348879		0.00121372	0.00129436
NM_027592	153	109	149	129	156	263	209.5		360	726	543	460	705	582.5		0.014698	0.0210899	0.0178939	0.025905	0.024823	0.025364		0.000753723	0.000946031	0.000849877	0.00118334	0.00101701	0.00110017			0.0178939	0.025364		0.000849877	0.00110017
NM_001102437	490	150	177	163.5	151	257	204		176	961	568.5	186	979	582.5		0.0202265	0.0250531	0.0226398	0.0250747	0.0242567	0.0246657		0.000368487	0.00125225	0.00081037	0.00047848	0.00141228	0.000945378			0.0226398	0.0246657		0.00081037	0.000945378
NM_146032	606	319	409	364	311	522	416.5		366	1152	759	537	629	583		0.0430151	0.057891	0.0504531	0.051644	0.0492685	0.0504562		0.000766285	0.00150114	0.00113371	0.00138142	0.000907377	0.0011444			0.0504531	0.0504562		0.00113371	0.0011444
NM_026194	774	159	208	183.5	167	209	188		363	1499	931	354	812	583		0.0214401	0.0294409	0.0254405	0.0277317	0.0197263	0.023729		0.000760004	0.00195331	0.00135665	0.000910655	0.00117137	0.00104101			0.0254405	0.023729		0.00135665	0.00104101
NM_024171	77	89	317	203	81	436	258.5		352	806	579	371	796	583.5		0.0120011	0.0448691	0.0284351	0.0134507	0.0411515	0.0273011		0.000736974	0.00105028	0.000893625	0.000954387	0.00114829	0.00105134			0.0284351	0.0273011		0.000893625	0.00105134
NM_021504	632	176	159	167.5	115	137	126		570	1456	1013	407	760	583.5		0.0237325	0.0225053	0.0231189	0.0190966	0.0129306	0.0160136		0.00119339	0.00189727	0.00154533	0.001047	0.00109635	0.00107168			0.0231189	0.0160136		0.00154533	0.00107168
NM_001039353	682	377	464	420.5	391	638	514.5		427	706	566.5	677	491	584		0.050836	0.0656759	0.0582559	0.0649286	0.0602171	0.0625728		0.000893999	0.000919969	0.000906984	0.00174156	0.000708302	0.00122493			0.0582559	0.0625728		0.000906984	0.00122493
NM_016878	454	152	210	181	162	238	200		421	841	631	592	577	584.5		0.0204962	0.029724	0.0251101	0.0269014	0.0224634	0.0246824		0.000881437	0.00109588	0.000988661	0.0015229	0.000832363	0.00117763			0.0251101	0.0246824		0.000988661	0.00117763
NM_001253820	248	131	73	102	192	371	281.5		167	555	361	147	1023	585		0.0176645	0.0103326	0.0139986	0.0318831	0.0350165	0.0334498		0.000349644	0.000723205	0.000536425	0.000378154	0.00147575	0.000926952			0.0139986	0.0334498		0.000536425	0.000926952
NM_001102438	489	150	177	163.5	151	255	203		178	957	567.5	187	983	585		0.0202265	0.0250531	0.0226398	0.0250747	0.024068	0.0245713		0.000372674	0.00124704	0.000809857	0.000481052	0.00141805	0.00094955			0.0226398	0.0245713		0.000809857	0.00094955
NM_001205156	260	143	221	182	149	270	209.5		624	819	721.5	611	559	585		0.0192826	0.031281	0.0252818	0.0247426	0.0254837	0.0251132		0.00130645	0.00106722	0.00118683	0.00157178	0.000806397	0.00118909			0.0252818	0.0251132		0.00118683	0.00118909
NM_001110831	456	152	210	181	162	239	200.5		421	841	631	592	579	585.5		0.0204962	0.029724	0.0251101	0.0269014	0.0225578	0.0247296		0.000881437	0.00109588	0.000988661	0.0015229	0.000835248	0.00117908			0.0251101	0.0247296		0.000988661	0.00117908
NM_001045959	1318	94	125	109.5	140	142	141		344	1330	837	372	799	585.5		0.0126753	0.0176929	0.0151841	0.0232481	0.0134025	0.0183253		0.000720224	0.00173309	0.00122666	0.00095696	0.00115261	0.00105479			0.0151841	0.0183253		0.00122666	0.00105479
NM_008845	386	129	78	103.5	128	132	130		178	826	502	229	943	586		0.0173948	0.0110403	0.0142176	0.0212554	0.0124587	0.0168571		0.000372674	0.00107634	0.000724506	0.000589096	0.00136034	0.00097472			0.0142176	0.0168571		0.000724506	0.00097472
NM_001164252	229	284	206	245	213	303	258		716	610	663	603	569	586		0.0382956	0.0291578	0.0337267	0.0353703	0.0285984	0.0319844		0.00149907	0.000794874	0.00114697	0.0015512	0.000820823	0.00118601			0.0337267	0.0319844		0.00114697	0.00118601
NM_001199274	304	121	133	127	102	188	145		360	960	660	394	779	586.5		0.0163161	0.0188252	0.0175706	0.0169379	0.0177442	0.0173411		0.000753723	0.00125095	0.00100234	0.00101355	0.00112376	0.00106866			0.0175706	0.0173411		0.00100234	0.00106866
NM_001077707	1655	120	150	135	151	125	138		249	1614	931.5	299	874	586.5		0.0161812	0.0212314	0.0187063	0.0250747	0.011798	0.0184364		0.000521325	0.00210316	0.00131224	0.000769169	0.00126081	0.00101499			0.0187063	0.0184364		0.00131224	0.00101499
NM_178605	159	98	152	125	128	178	153		391	999	695	565	609	587		0.0132147	0.0215145	0.0173646	0.0212554	0.0168004	0.0190279		0.000818627	0.00130177	0.0010602	0.00145345	0.000878525	0.00116599			0.0173646	0.0190279		0.0010602	0.00116599
NM_019879	327	229	316	272.5	205	419	312		392	1016	704	584	590	587		0.0308792	0.0447275	0.0378034	0.0340418	0.039547	0.0367944		0.000820721	0.00132392	0.00107232	0.00150232	0.000851117	0.00117672			0.0378034	0.0367944		0.00107232	0.00117672
NM_010723	146	191	172	181.5	354	458	406		537	356	446.5	715	460	587.5		0.0257551	0.0243454	0.0250502	0.0587845	0.0432279	0.0510062		0.0011243	0.000463894	0.000794099	0.00183932	0.000663582	0.00125145			0.0250502	0.0510062		0.000794099	0.00125145
NM_001161770	146	191	172	181.5	354	458	406		537	356	446.5	715	460	587.5		0.0257551	0.0243454	0.0250502	0.0587845	0.0432279	0.0510062		0.0011243	0.000463894	0.000794099	0.00183932	0.000663582	0.00125145			0.0250502	0.0510062		0.000794099	0.00125145
NM_001161769	146	191	172	181.5	354	458	406		537	356	446.5	715	460	587.5		0.0257551	0.0243454	0.0250502	0.0587845	0.0432279	0.0510062		0.0011243	0.000463894	0.000794099	0.00183932	0.000663582	0.00125145			0.0250502	0.0510062		0.000794099	0.00125145
NM_018730	86	487	1127	807	572	2069	1320.5		956	256	606	1085	90	587.5		0.0656688	0.159519	0.112594	0.0949851	0.195281	0.145133		0.00200155	0.000333587	0.00116757	0.00279113	0.000129831	0.00146048			0.112594	0.145133		0.00116757	0.00146048
NM_175363	293	204	184	194	190	341	265.5		303	925	614	263	913	588		0.0275081	0.0260439	0.026776	0.031551	0.032185	0.031868		0.000634384	0.00120534	0.000919863	0.00067656	0.00131707	0.000996814			0.026776	0.031868		0.000919863	0.000996814
NM_001113487	557	324	680	502	244	599	421.5		494	1725	1109.5	412	764	588		0.0436893	0.0962491	0.0699692	0.0405181	0.0565361	0.0485271		0.00103428	0.0022478	0.00164104	0.00105986	0.00110212	0.00108099			0.0699692	0.0485271		0.00164104	0.00108099
NM_175397	426	176	274	225	229	1093	661		309	329	319	400	778	589		0.0237325	0.0387827	0.0312576	0.0380272	0.103162	0.0705946		0.000646946	0.000428711	0.000537828	0.00102899	0.00112232	0.00107565			0.0312576	0.0705946		0.000537828	0.00107565
NM_030194	426	176	274	225	229	1093	661		309	329	319	400	778	589		0.0237325	0.0387827	0.0312576	0.0380272	0.103162	0.0705946		0.000646946	0.000428711	0.000537828	0.00102899	0.00112232	0.00107565			0.0312576	0.0705946		0.000537828	0.00107565
NM_145929	616	191	284	237.5	216	527	371.5		355	1015	685	410	768	589		0.0257551	0.0401982	0.0329766	0.0358685	0.0497404	0.0428045		0.000743255	0.00132262	0.00103294	0.00105471	0.00110789	0.0010813			0.0329766	0.0428045		0.00103294	0.0010813
NM_009833	705	276	263	269.5	233	196	214.5		605	1803	1204	527	651	589		0.0372168	0.0372258	0.0372213	0.0386915	0.0184993	0.0285954		0.00126667	0.00234944	0.00180806	0.00135569	0.000939113	0.0011474			0.0372213	0.0285954		0.00180806	0.0011474
NM_001042671	656	225	132	178.5	165	107	136		546	1970	1258	395	783	589		0.0303398	0.0186837	0.0245117	0.0273995	0.0100991	0.0187493		0.00114315	0.00256705	0.0018551	0.00101613	0.00112953	0.00107283			0.0245117	0.0187493		0.0018551	0.00107283
NM_028802	656	225	132	178.5	165	107	136		546	1970	1258	395	783	589		0.0303398	0.0186837	0.0245117	0.0273995	0.0100991	0.0187493		0.00114315	0.00256705	0.0018551	0.00101613	0.00112953	0.00107283			0.0245117	0.0187493		0.0018551	0.00107283
NM_031391	359	377	284	330.5	365	694	529.5		213	696	454.5	315	864	589.5		0.050836	0.0401982	0.0455171	0.0606111	0.0655026	0.0630568		0.000445953	0.000906938	0.000676446	0.000810329	0.00124638	0.00102835			0.0455171	0.0630568		0.000676446	0.00102835
NM_001168652	630	151	198	174.5	129	313	221		446	979	712.5	519	660	589.5		0.0203614	0.0280255	0.0241934	0.0214215	0.0295422	0.0254818		0.000933779	0.00127571	0.00110474	0.00133511	0.000952097	0.00114361			0.0241934	0.0254818		0.00110474	0.00114361
NM_001164253	229	303	206	254.5	235	326	280.5		673	583	628	614	567	590.5		0.0408576	0.0291578	0.0350077	0.0390236	0.0307692	0.0348964		0.00140904	0.000759691	0.00108437	0.0015795	0.000817937	0.00119872			0.0350077	0.0348964		0.00108437	0.00119872
NM_001160208	384	115	113	114	155	144	149.5		328	1034	681	482	699	590.5		0.015507	0.0159943	0.0157507	0.025739	0.0135913	0.0196651		0.000686725	0.00134738	0.00101705	0.00123993	0.00100836	0.00112414			0.0157507	0.0196651		0.00101705	0.00112414
NM_001160209	384	115	113	114	155	144	149.5		328	1034	681	482	699	590.5		0.015507	0.0159943	0.0157507	0.025739	0.0135913	0.0196651		0.000686725	0.00134738	0.00101705	0.00123993	0.00100836	0.00112414			0.0157507	0.0196651		0.00101705	0.00112414
NM_025505	391	115	113	114	155	143	149		328	1035	681.5	482	699	590.5		0.015507	0.0159943	0.0157507	0.025739	0.0134969	0.0196179		0.000686725	0.00134868	0.0010177	0.00123993	0.00100836	0.00112414			0.0157507	0.0196179		0.0010177	0.00112414
NM_009191	658	125	140	132.5	114	143	128.5		734	602	668	748	434	591		0.0168554	0.019816	0.0183357	0.0189306	0.0134969	0.0162138		0.00153676	0.00078445	0.0011606	0.00192421	0.000626076	0.00127514			0.0183357	0.0162138		0.0011606	0.00127514
NM_013604	442	92	186	139	120	249	184.5		518	827	672.5	616	566	591		0.0124056	0.026327	0.0193663	0.0199269	0.0235017	0.0217143		0.00108452	0.00107764	0.00108108	0.00158464	0.000816495	0.00120057			0.0193663	0.0217143		0.00108108	0.00120057
NM_175127	349	120	111	115.5	146	168	157		628	794	711	722	461	591.5		0.0161812	0.0157113	0.0159462	0.0242444	0.0158565	0.0200505		0.00131483	0.00103464	0.00117473	0.00185733	0.000665025	0.00126118			0.0159462	0.0200505		0.00117473	0.00126118
NM_013818	649	95	137	116	81	179	130		546	1026	786	596	588	592		0.0128101	0.0193914	0.0161008	0.0134507	0.0168948	0.0151727		0.00114315	0.00133695	0.00124005	0.00153319	0.000848231	0.00119071			0.0161008	0.0151727		0.00124005	0.00119071
NM_001161424	392	123	167	145	177	202	189.5		479	841	660	659	526	592.5		0.0165858	0.0236377	0.0201117	0.0293922	0.0190656	0.0242289		0.00100287	0.00109588	0.00104938	0.00169526	0.000758792	0.00122703			0.0201117	0.0242289		0.00104938	0.00122703
NM_178590	392	123	167	145	177	202	189.5		479	841	660	659	526	592.5		0.0165858	0.0236377	0.0201117	0.0293922	0.0190656	0.0242289		0.00100287	0.00109588	0.00104938	0.00169526	0.000758792	0.00122703			0.0201117	0.0242289		0.00104938	0.00122703
NM_019388	290	196	245	220.5	104	451	277.5		521	917	719	318	867	592.5		0.0264293	0.034678	0.0305537	0.01727	0.0425672	0.0299186		0.0010908	0.00119492	0.00114286	0.000818046	0.00125071	0.00103438			0.0305537	0.0299186		0.00114286	0.00103438
NM_001252436	815	121	80	100.5	146	135	140.5		322	759	540.5	521	665	593		0.0163161	0.0113234	0.0138197	0.0242444	0.0127419	0.0184931		0.000674163	0.000989032	0.000831598	0.00134026	0.000959309	0.00114978			0.0138197	0.0184931		0.000831598	0.00114978
NM_001164406	132	94	149	121.5	128	315	221.5		586	672	629	672	515	593.5		0.0126753	0.0210899	0.0168826	0.0212554	0.029731	0.0254932		0.00122689	0.000875665	0.00105128	0.0017287	0.000742924	0.00123581			0.0168826	0.0254932		0.00105128	0.00123581
NM_011390	1064	188	414	301	167	419	293		364	1531	947.5	425	762	593.5		0.0253506	0.0585987	0.0419747	0.0277317	0.039547	0.0336393		0.000762098	0.001995	0.00137855	0.0010933	0.00109924	0.00109627			0.0419747	0.0336393		0.00137855	0.00109627
NM_001033966	220	330	385	357.5	255	448	351.5		742	747	744.5	782	408	595		0.0444984	0.054494	0.0494962	0.0423447	0.0422841	0.0423144		0.00155351	0.000973395	0.00126345	0.00201167	0.000588569	0.00130012			0.0494962	0.0423144		0.00126345	0.00130012
NM_026269	308	90	133	111.5	115	163	139		676	1014	845	611	579	595		0.0121359	0.0188252	0.0154806	0.0190966	0.0153846	0.0172406		0.00141532	0.00132132	0.00136832	0.00157178	0.000835248	0.00120351			0.0154806	0.0172406		0.00136832	0.00120351
NM_001039351	681	376	464	420	390	638	514		452	708	580	696	495	595.5		0.0507012	0.0656759	0.0581885	0.0647625	0.0602171	0.0624898		0.000946341	0.000922575	0.000934458	0.00179044	0.000714072	0.00125226			0.0581885	0.0624898		0.000934458	0.00125226
NM_011869	968	104	146	125	112	128	120		507	1334	920.5	598	593	595.5		0.0140237	0.0206653	0.0173445	0.0185985	0.0120812	0.0153398		0.00106149	0.0017383	0.0013999	0.00153834	0.000855444	0.00119689			0.0173445	0.0153398		0.0013999	0.00119689
NM_013863	558	296	551	423.5	341	977	659		487	1407	947	414	777	595.5		0.0399137	0.0779901	0.0589519	0.0566257	0.0922133	0.0744195		0.00101962	0.00183342	0.00142652	0.001065	0.00112088	0.00109294			0.0589519	0.0744195		0.00142652	0.00109294
NM_144870	193	128	240	184	138	289	213.5		440	761	600.5	502	691	596.5		0.01726	0.0339703	0.0256151	0.022916	0.027277	0.0250965		0.000921217	0.000991638	0.000956428	0.00129138	0.000996816	0.0011441			0.0256151	0.0250965		0.000956428	0.0011441
NM_007437	465	128	154	141	124	142	133		505	1213	859	573	620	596.5		0.01726	0.0217976	0.0195288	0.0205912	0.0134025	0.0169969		0.00105731	0.00158063	0.00131897	0.00147403	0.000894394	0.00118421			0.0195288	0.0169969		0.00131897	0.00118421
NM_025435	185	124	121	122.5	91	205	148		511	608	559.5	564	630	597		0.0167206	0.0171267	0.0169236	0.0151113	0.0193487	0.01723		0.00106987	0.000792268	0.000931068	0.00145087	0.000908819	0.00117985			0.0169236	0.01723		0.000931068	0.00117985
NM_007927	240	139	222	180.5	178	352	265		529	591	560	681	513	597		0.0187433	0.0314225	0.0250829	0.0295583	0.0332232	0.0313908		0.00110755	0.000770116	0.000938835	0.00175185	0.000740039	0.00124595			0.0250829	0.0313908		0.000938835	0.00124595
NM_009296	98	201	212	206.5	148	283	215.5		811	486	648.5	716	478	597		0.0271036	0.0300071	0.0285553	0.0245766	0.0267107	0.0256436		0.00169797	0.000633293	0.00116563	0.00184189	0.000689549	0.00126572			0.0285553	0.0256436		0.00116563	0.00126572
NM_025333	145	89	184	136.5	101	140	120.5		468	1074	771	541	654	597.5		0.0120011	0.0260439	0.0190225	0.0167718	0.0132138	0.0149928		0.00097984	0.0013995	0.00118967	0.00139171	0.000943441	0.00116757			0.0190225	0.0149928		0.00118967	0.00116757
NM_012019	593	132	139	135.5	132	125	128.5		638	773	705.5	738	458	598		0.0177994	0.0196745	0.0187369	0.0219196	0.011798	0.0168588		0.00133576	0.00100728	0.00117152	0.00189849	0.000660697	0.00127959			0.0187369	0.0168588		0.00117152	0.00127959
NM_009727	1130	112	95	103.5	123	132	127.5		497	1221	859	345	851	598		0.0151025	0.0134466	0.0142745	0.0204251	0.0124587	0.0164419		0.00104056	0.00159105	0.0013158	0.000887503	0.00122763	0.00105757			0.0142745	0.0164419		0.0013158	0.00105757
NM_029979	497	248	293	270.5	247	361	304		655	1374	1014.5	725	471	598		0.0334412	0.041472	0.0374566	0.0410163	0.0340727	0.0375445		0.00137136	0.00179042	0.00158089	0.00186504	0.000679451	0.00127225			0.0374566	0.0375445		0.00158089	0.00127225
NM_028762	933	118	120	119	140	204	172		783	801	792	745	452	598.5		0.0159115	0.0169851	0.0164483	0.0232481	0.0192544	0.0212512		0.00163935	0.00104376	0.00134155	0.00191649	0.000652042	0.00128427			0.0164483	0.0212512		0.00134155	0.00128427
NM_178050	393	166	111	138.5	129	161	145		635	1057	846	413	784	598.5		0.022384	0.0157113	0.0190476	0.0214215	0.0151958	0.0183087		0.00132948	0.00137735	0.00135342	0.00106243	0.00113098	0.0010967			0.0190476	0.0183087		0.00135342	0.0010967
NM_020506	1132	151	225	188	194	194	194		495	1677	1086	336	861	598.5		0.0203614	0.0318471	0.0261043	0.0322152	0.0183105	0.0252629		0.00103637	0.00218525	0.00161081	0.000864351	0.00124205	0.0010532			0.0261043	0.0252629		0.00161081	0.0010532
NM_146115	407	235	242	238.5	271	259	265		744	1433	1088.5	622	575	598.5		0.0316882	0.0342534	0.0329708	0.0450017	0.0244455	0.0347236		0.00155769	0.0018673	0.0017125	0.00160008	0.000829478	0.00121478			0.0329708	0.0347236		0.0017125	0.00121478
NM_025843	118	86	215	150.5	81	350	215.5		828	252	540	952	246	599		0.0115965	0.0304317	0.0210141	0.0134507	0.0330345	0.0232426		0.00173356	0.000328374	0.00103097	0.00244899	0.000354872	0.00140193			0.0210141	0.0232426		0.00103097	0.00140193
NM_197979	45	132	218	175	145	380	262.5		915	327	621	799	399	599		0.0177994	0.0308563	0.0243278	0.0240784	0.035866	0.0299722		0.00191571	0.000426105	0.00117091	0.00205541	0.000575586	0.0013155			0.0243278	0.0299722		0.00117091	0.0013155
NM_001177467	266	2001	1794	1897.5	1597	2743	2170		745	717	731	712	486	599		0.269822	0.253928	0.261875	0.265194	0.258896	0.262045		0.00155979	0.000934303	0.00124705	0.0018316	0.000701089	0.00126635			0.261875	0.262045		0.00124705	0.00126635
NM_146062	362	221	191	206	204	362	283		319	941	630	265	934	599.5		0.0298004	0.0270347	0.0284176	0.0338758	0.0341671	0.0340214		0.000667882	0.00122619	0.000947037	0.000681705	0.00134736	0.00101453			0.0284176	0.0340214		0.000947037	0.00101453
NM_016895	213	326	387	356.5	247	441	344		756	761	758.5	784	415	599.5		0.043959	0.0547771	0.049368	0.0410163	0.0416234	0.0413198		0.00158282	0.000991638	0.00128723	0.00201682	0.000598667	0.00130774			0.049368	0.0413198		0.00128723	0.00130774
NM_009461	1738	170	175	172.5	218	139	178.5		423	1467	945	424	775	599.5		0.0229234	0.02477	0.0238467	0.0362006	0.0131194	0.02466		0.000885625	0.00191161	0.00139862	0.00109073	0.00111799	0.00110436			0.0238467	0.02466		0.00139862	0.00110436
NM_133950	193	465	613	539	464	786	625		366	1143	754.5	538	662	600		0.0627023	0.0867657	0.074734	0.0770508	0.0741859	0.0756184		0.000766285	0.00148941	0.00112785	0.00138399	0.000954982	0.00116949			0.074734	0.0756184		0.00112785	0.00116949
NM_001164197	436	78	198	138	87	130	108.5		403	1724	1063.5	526	674	600		0.0105178	0.0280255	0.0192716	0.014447	0.0122699	0.0133585		0.000843751	0.0022465	0.00154512	0.00135312	0.000972293	0.00116271			0.0192716	0.0133585		0.00154512	0.00116271
NM_019809	318	240	308	274	212	421	316.5		430	725	577.5	544	657	600.5		0.0323625	0.0435952	0.0379788	0.0352043	0.0397357	0.03747		0.00090028	0.000944728	0.000922504	0.00139943	0.000947769	0.0011736			0.0379788	0.03747		0.000922504	0.0011736
NM_145605	565	111	156	133.5	121	264	192.5		471	756	613.5	557	644	600.5		0.0149676	0.0220807	0.0185242	0.020093	0.0249174	0.0225052		0.000986121	0.000985123	0.000985622	0.00143287	0.000929015	0.00118094			0.0185242	0.0225052		0.000985622	0.00118094
NM_177363	269	141	166	153.5	374	228	301		385	848	616.5	639	562	600.5		0.0190129	0.0234961	0.0212545	0.0621056	0.0215196	0.0418126		0.000806065	0.00110501	0.000955535	0.00164381	0.000810725	0.00122727			0.0212545	0.0418126		0.000955535	0.00122727
NM_007965	374	208	747	477.5	164	1239	701.5		284	1118	701	330	872	601		0.0280475	0.105732	0.06689	0.0272335	0.116942	0.0720877		0.000594604	0.00145684	0.00102572	0.000848916	0.00125792	0.00105342			0.06689	0.0720877		0.00102572	0.00105342
NM_026036	164	174	196	185	212	422	317		434	842	638	602	601	601.5		0.0234628	0.0277424	0.0256026	0.0352043	0.0398301	0.0375172		0.000908655	0.00109719	0.00100292	0.00154863	0.000866985	0.00120781			0.0256026	0.0375172		0.00100292	0.00120781
NM_134017	315	121	133	127	102	189	145.5		361	984	672.5	407	796	601.5		0.0163161	0.0188252	0.0175706	0.0169379	0.0178386	0.0173882		0.000755817	0.00128222	0.00101902	0.001047	0.00114829	0.00109764			0.0175706	0.0173882		0.00101902	0.00109764
NM_175550	1103	142	117	129.5	140	116	128		262	1173	717.5	430	773	601.5		0.0191478	0.0165605	0.0178541	0.0232481	0.0109486	0.0170983		0.000548543	0.0015285	0.00103852	0.00110616	0.00111511	0.00111064			0.0178541	0.0170983		0.00103852	0.00111064
NM_001163395	380	210	754	482	164	1255	709.5		284	1125	704.5	331	874	602.5		0.0283172	0.106723	0.0675202	0.0272335	0.118452	0.0728428		0.000594604	0.00146596	0.00103028	0.000851489	0.00126081	0.00105615			0.0675202	0.0728428		0.00103028	0.00105615
NM_153178	841	250	187	218.5	232	249	240.5		445	1647	1046	452	754	603		0.0337109	0.0264685	0.0300897	0.0385254	0.0235017	0.0310135		0.000931685	0.00214616	0.00153892	0.00116276	0.0010877	0.00112523			0.0300897	0.0310135		0.00153892	0.00112523
NM_008478	1240	524	134	329	490	152	321		1001	369	685	974	233	603.5		0.070658	0.0189667	0.0448124	0.0813683	0.0143464	0.0478574		0.00209577	0.000480834	0.0012883	0.00250559	0.000336119	0.00142085			0.0448124	0.0478574		0.0012883	0.00142085
NM_011304	444	240	323	281.5	301	339	320		579	728	653.5	855	353	604		0.0323625	0.0457183	0.0390404	0.0499834	0.0319962	0.0409898		0.00121224	0.000948637	0.00108044	0.00219946	0.000509227	0.00135435			0.0390404	0.0409898		0.00108044	0.00135435
NM_007790	1198	329	258	293.5	372	218	295		388	1215	801.5	425	783	604		0.0443635	0.036518	0.0404408	0.0617735	0.0205757	0.0411746		0.000812346	0.00158323	0.00119779	0.0010933	0.00112953	0.00111142			0.0404408	0.0411746		0.00119779	0.00111142
NM_178744	694	133	162	147.5	133	129	131		356	1561	958.5	429	780	604.5		0.0179342	0.0229299	0.0204321	0.0220857	0.0121756	0.0171306		0.000745348	0.0020341	0.00138972	0.00110359	0.00112521	0.0011144			0.0204321	0.0171306		0.00138972	0.0011144
NM_001190258	65	621	1490	1055.5	588	2523	1555.5		1298	297	797.5	1055	155	605		0.0837379	0.210899	0.147318	0.097642	0.238131	0.167887		0.00271759	0.000387013	0.0015523	0.00271396	0.000223598	0.00146878			0.147318	0.167887		0.0015523	0.00146878
NM_027015	65	621	1490	1055.5	588	2523	1555.5		1298	297	797.5	1055	155	605		0.0837379	0.210899	0.147318	0.097642	0.238131	0.167887		0.00271759	0.000387013	0.0015523	0.00271396	0.000223598	0.00146878			0.147318	0.167887		0.0015523	0.00146878
NM_022981	813	118	131	124.5	168	204	186		460	832	646	546	668	607		0.0159115	0.0185421	0.0172268	0.0278977	0.0192544	0.023576		0.000963091	0.00108416	0.00102362	0.00140457	0.000963637	0.0011841			0.0172268	0.023576		0.00102362	0.0011841
NM_016677	174	367	432	399.5	346	620	483		465	876	670.5	543	672	607.5		0.0494876	0.0611465	0.055317	0.057456	0.0585182	0.0579871		0.000973559	0.00114149	0.00105753	0.00139685	0.000969407	0.00118313			0.055317	0.0579871		0.00105753	0.00118313
NM_009667	747	580	584	582	446	206	326		1013	3589	2301	671	544	607.5		0.0782093	0.082661	0.0804351	0.0740618	0.0194431	0.0467525		0.00212089	0.00467673	0.00339881	0.00172613	0.000784758	0.00125544			0.0804351	0.0467525		0.00339881	0.00125544
NM_001167939	631	142	169	155.5	168	232	200		476	1079	777.5	646	570	608		0.0191478	0.0239207	0.0215343	0.0278977	0.0218971	0.0248974		0.000996589	0.00140602	0.0012013	0.00166182	0.000822265	0.00124204			0.0215343	0.0248974		0.0012013	0.00124204
NM_146235	1221	91	111	101	177	95	136		398	1132	765	502	717	609.5		0.0122708	0.0157113	0.013991	0.0293922	0.00896649	0.0191794		0.000833283	0.00147508	0.00115418	0.00129138	0.00103432	0.00116285			0.013991	0.0191794		0.00115418	0.00116285
NM_001077688	2771	107	132	119.5	178	130	154		375	1292	833.5	419	801	610		0.0144283	0.0186837	0.016556	0.0295583	0.0122699	0.0209141		0.000785128	0.00168357	0.00123435	0.00107787	0.0011555	0.00111668			0.016556	0.0209141		0.00123435	0.00111668
NM_178751	231	502	483	492.5	225	166	195.5		1620	1247	1433.5	844	376	610		0.0676915	0.0683652	0.0680283	0.037363	0.0156678	0.0265154		0.00339175	0.00162493	0.00250834	0.00217117	0.000542407	0.00135679			0.0680283	0.0265154		0.00250834	0.00135679
NM_007452	238	211	363	287	156	377	266.5		396	1203	799.5	505	716	610.5		0.028452	0.05138	0.039916	0.025905	0.0355828	0.0307439		0.000829095	0.0015676	0.00119835	0.0012991	0.00103288	0.00116599			0.039916	0.0307439		0.00119835	0.00116599
NM_013594	569	97	117	107	177	166	171.5		481	1281	881	669	552	610.5		0.0130798	0.0165605	0.0148202	0.0293922	0.0156678	0.02253		0.00100706	0.00166924	0.00133815	0.00172098	0.000796299	0.00125864			0.0148202	0.02253		0.00133815	0.00125864
NM_001163455	874	155	172	163.5	153	218	185.5		304	1295	799.5	302	921	611.5		0.0209008	0.0243454	0.0226231	0.0254068	0.0205757	0.0229913		0.000636477	0.00168748	0.00116198	0.000776887	0.00132861	0.00105275			0.0226231	0.0229913		0.00116198	0.00105275
NM_026612	86	95	178	136.5	110	210	160		648	1163	905.5	641	582	611.5		0.0128101	0.0251946	0.0190024	0.0182664	0.0198207	0.0190435		0.0013567	0.00151547	0.00143609	0.00164896	0.000839576	0.00124427			0.0190024	0.0190435		0.00143609	0.00124427
NM_001033261	1973	109	145	127	123	105	114		258	2105	1181.5	254	969	611.5		0.014698	0.0205237	0.0176108	0.0204251	0.00991034	0.0151677		0.000540168	0.00274297	0.00164157	0.000653408	0.00139785	0.00102563			0.0176108	0.0151677		0.00164157	0.00102563
NM_134114	140	241	310	275.5	174	516	345		381	639	510	486	739	612.5		0.0324973	0.0438783	0.0381878	0.0288941	0.0487022	0.0387981		0.00079769	0.000832663	0.000815177	0.00125022	0.00106606	0.00115814			0.0381878	0.0387981		0.000815177	0.00115814
NM_021525	354	109	108	108.5	156	60	108		686	775	730.5	912	313	612.5		0.014698	0.0152866	0.0149923	0.025905	0.00566305	0.015784		0.00143626	0.00100988	0.00122307	0.0023461	0.000451525	0.00139881			0.0149923	0.015784		0.00122307	0.00139881
NM_144959	822	141	150	145.5	197	180	188.5		289	1206	747.5	378	847	612.5		0.0190129	0.0212314	0.0201222	0.0327134	0.0169891	0.0248513		0.000605072	0.00157151	0.00108829	0.000972395	0.00122186	0.00109713			0.0201222	0.0248513		0.00108829	0.00109713
NM_001164480	1019	84	153	118.5	132	175	153.5		472	1153	812.5	615	611	613		0.0113269	0.0216561	0.0164915	0.0219196	0.0165172	0.0192184		0.000988215	0.00150244	0.00124533	0.00158207	0.000881411	0.00123174			0.0164915	0.0192184		0.00124533	0.00123174
NM_001164481	1019	84	153	118.5	132	175	153.5		472	1153	812.5	615	611	613		0.0113269	0.0216561	0.0164915	0.0219196	0.0165172	0.0192184		0.000988215	0.00150244	0.00124533	0.00158207	0.000881411	0.00123174			0.0164915	0.0192184		0.00124533	0.00123174
NM_001164482	1019	84	153	118.5	132	175	153.5		472	1153	812.5	615	611	613		0.0113269	0.0216561	0.0164915	0.0219196	0.0165172	0.0192184		0.000988215	0.00150244	0.00124533	0.00158207	0.000881411	0.00123174			0.0164915	0.0192184		0.00124533	0.00123174
NM_011379	1019	84	153	118.5	132	175	153.5		472	1153	812.5	615	611	613		0.0113269	0.0216561	0.0164915	0.0219196	0.0165172	0.0192184		0.000988215	0.00150244	0.00124533	0.00158207	0.000881411	0.00123174			0.0164915	0.0192184		0.00124533	0.00123174
NM_001164568	1019	84	153	118.5	132	175	153.5		472	1153	812.5	615	611	613		0.0113269	0.0216561	0.0164915	0.0219196	0.0165172	0.0192184		0.000988215	0.00150244	0.00124533	0.00158207	0.000881411	0.00123174			0.0164915	0.0192184		0.00124533	0.00123174
NM_028079	804	151	179	165	56	219	137.5		1147	821	984	554	673	613.5		0.0203614	0.0253362	0.0228488	0.00929924	0.0206701	0.0149847		0.00240145	0.00106982	0.00173563	0.00142515	0.00097085	0.001198			0.0228488	0.0149847		0.00173563	0.001198
NM_001177352	420	343	696	519.5	149	520	334.5		499	2618	1558.5	238	989	613.5		0.0462513	0.0985138	0.0723826	0.0247426	0.0490798	0.0369112		0.00104474	0.00341144	0.00222809	0.000612249	0.0014267	0.00101948			0.0723826	0.0369112		0.00222809	0.00101948
NM_001177354	420	343	696	519.5	149	520	334.5		499	2618	1558.5	238	989	613.5		0.0462513	0.0985138	0.0723826	0.0247426	0.0490798	0.0369112		0.00104474	0.00341144	0.00222809	0.000612249	0.0014267	0.00101948			0.0723826	0.0369112		0.00222809	0.00101948
NM_028874	978	108	133	120.5	206	171	188.5		302	974	638	473	756	614.5		0.0145631	0.0188252	0.0166942	0.0342079	0.0161397	0.0251738		0.00063229	0.00126919	0.000950741	0.00121678	0.00109058	0.00115368			0.0166942	0.0251738		0.000950741	0.00115368
NM_025282	413	67	188	127.5	57	306	181.5		244	1272	758	216	1013	614.5		0.00903452	0.02661	0.0178223	0.00946529	0.0288815	0.0191734		0.000510857	0.00165751	0.00108418	0.000555654	0.00146132	0.00100849			0.0178223	0.0191734		0.00108418	0.00100849
NM_001170591	237	179	174	176.5	170	281	225.5		513	412	462.5	840	391	615.5		0.024137	0.0246285	0.0243827	0.0282298	0.0265219	0.0273759		0.00107406	0.000536866	0.000805461	0.00216088	0.000564045	0.00136246			0.0243827	0.0273759		0.000805461	0.00136246
NM_028993	599	140	174	157	172	247	209.5		547	1107	827	703	528	615.5		0.0188781	0.0246285	0.0217533	0.0285619	0.0233129	0.0259374		0.00114524	0.0014425	0.00129387	0.00180845	0.000761677	0.00128506			0.0217533	0.0259374		0.00129387	0.00128506
NM_030695	2835	107	135	121	180	130	155		387	1315	851	424	808	616		0.0144283	0.0191083	0.0167683	0.0298904	0.0122699	0.0210802		0.000810252	0.00171354	0.0012619	0.00109073	0.0011656	0.00112816			0.0167683	0.0210802		0.0012619	0.00112816
NM_134010	907	174	184	179	165	206	185.5		549	940	744.5	667	566	616.5		0.0234628	0.0260439	0.0247533	0.0273995	0.0194431	0.0234213		0.00114943	0.00122489	0.00118716	0.00171584	0.000816495	0.00126617			0.0247533	0.0234213		0.00118716	0.00126617
NM_179203	572	103	129	116	147	109	128		554	946	750	787	446	616.5		0.0138889	0.018259	0.016074	0.0244105	0.0102879	0.0173492		0.0011599	0.00123271	0.0011963	0.00202454	0.000643386	0.00133396			0.016074	0.0173492		0.0011963	0.00133396
NM_001001181	53	238	210	224	263	298	280.5		399	873	636	539	695	617		0.0320928	0.029724	0.0309084	0.0436732	0.0281265	0.0358998		0.000835376	0.00113758	0.000986479	0.00138656	0.00100259	0.00119457			0.0309084	0.0358998		0.000986479	0.00119457
NM_175135	426	117	149	133	144	114	129		601	994	797.5	777	457	617		0.0157767	0.0210899	0.0184333	0.0239123	0.0107598	0.0173361		0.0012583	0.00129525	0.00127678	0.00199881	0.000659255	0.00132903			0.0184333	0.0173361		0.00127678	0.00132903
NM_153055	741	677	403	540	631	636	633.5		400	1415	907.5	318	916	617		0.0912891	0.0570418	0.0741654	0.104782	0.0600283	0.0824054		0.00083747	0.00184385	0.00134066	0.000818046	0.00132139	0.00106972			0.0741654	0.0824054		0.00134066	0.00106972
NM_011459	355	222	273	247.5	189	261	225		601	1625	1113	408	826	617		0.0299353	0.0386412	0.0342882	0.0313849	0.0246343	0.0280096		0.0012583	0.00211749	0.0016879	0.00104957	0.00119156	0.00112057			0.0342882	0.0280096		0.0016879	0.00112057
NM_001159519	1318	126	189	157.5	139	170	154.5		564	1679	1121.5	662	572	617		0.0169903	0.0267516	0.0218709	0.023082	0.0160453	0.0195637		0.00118083	0.00218786	0.00168435	0.00170298	0.00082515	0.00126406			0.0218709	0.0195637		0.00168435	0.00126406
NM_026160	106	136	341	238.5	145	376	260.5		516	1137	826.5	474	761	617.5		0.0183387	0.0482661	0.0333024	0.0240784	0.0354884	0.0297834		0.00108034	0.00148159	0.00128096	0.00121935	0.0010978	0.00115857			0.0333024	0.0297834		0.00128096	0.00115857
NM_172541	324	140	141	140.5	103	144	123.5		590	1419	1004.5	533	702	617.5		0.0188781	0.0199575	0.0194178	0.017104	0.0135913	0.0153476		0.00123527	0.00184906	0.00154216	0.00137113	0.00101268	0.00119191			0.0194178	0.0153476		0.00154216	0.00119191
NM_139236	1133	196	359	277.5	206	289	247.5		543	1677	1110	689	547	618		0.0264293	0.0508139	0.0386216	0.0342079	0.027277	0.0307425		0.00113687	0.00218525	0.00166106	0.00177243	0.000789086	0.00128076			0.0386216	0.0307425		0.00166106	0.00128076
NM_026631	134	166	258	212	159	322	240.5		743	723	733	803	434	618.5		0.022384	0.036518	0.029451	0.0264032	0.0303917	0.0283974		0.0015556	0.000942121	0.00124886	0.0020657	0.000626076	0.00134589			0.029451	0.0283974		0.00124886	0.00134589
NM_008991	640	139	202	170.5	188	171	179.5		367	1337	852	444	793	618.5		0.0187433	0.0285916	0.0236675	0.0312189	0.0161397	0.0236793		0.000768379	0.00174221	0.00125529	0.00114218	0.00114396	0.00114307			0.0236675	0.0236793		0.00125529	0.00114307
NM_001242389	584	182	114	148	220	259	239.5		536	469	502.5	869	369	619		0.0245415	0.0161359	0.0203387	0.0365327	0.0244455	0.0304891		0.00112221	0.000611141	0.000866675	0.00223548	0.000532309	0.00138389			0.0203387	0.0304891		0.000866675	0.00138389
NM_011343	81	377	910	643.5	316	1267	791.5		571	568	569.5	820	419	619.5		0.050836	0.128804	0.08982	0.0524743	0.119585	0.0860295		0.00119549	0.000740145	0.000967817	0.00210943	0.000604437	0.00135693			0.08982	0.0860295		0.000967817	0.00135693
NM_133985	508	163	161	162	230	230	230		261	1065	663	391	848	619.5		0.0219795	0.0227884	0.0223839	0.0381933	0.0217084	0.0299508		0.000546449	0.00138777	0.000967111	0.00100584	0.0012233	0.00111457			0.0223839	0.0299508		0.000967111	0.00111457
NM_028925	514	116	144	130	177	244	210.5		431	902	666.5	505	734	619.5		0.0156419	0.0203822	0.018012	0.0293922	0.0230297	0.026211		0.000902374	0.00117537	0.00103887	0.0012991	0.00105885	0.00117897			0.018012	0.026211		0.00103887	0.00117897
NM_172482	716	140	110	125	90	88	89		1037	1675	1356	591	648	619.5		0.0188781	0.0155697	0.0172239	0.0149452	0.0083058	0.0116255		0.00217114	0.00218265	0.00217689	0.00152033	0.000934786	0.00122756			0.0172239	0.0116255		0.00217689	0.00122756
NM_001025599	526	84	124	104	161	527	344		190	453	321.5	347	893	620		0.0113269	0.0175513	0.0144391	0.0267353	0.0497404	0.0382379		0.000397798	0.000590292	0.000494045	0.000892648	0.00128822	0.00109043			0.0144391	0.0382379		0.000494045	0.00109043
NM_145991	512	252	196	224	319	360	339.5		169	923	546	197	1043	620		0.0339806	0.0277424	0.0308615	0.0529724	0.0339783	0.0434754		0.000353831	0.00120274	0.000778284	0.000506777	0.0015046	0.00100569			0.0308615	0.0434754		0.000778284	0.00100569
NM_145956	272	122	153	137.5	125	249	187		497	905	701	402	840	621		0.0164509	0.0216561	0.0190535	0.0207572	0.0235017	0.0221294		0.00104056	0.00117928	0.00110992	0.00103413	0.00121176	0.00112295			0.0190535	0.0221294		0.00110992	0.00112295
NM_026316	449	256	340	298	288	279	283.5		749	877	813	736	507	621.5		0.03452	0.0481246	0.0413223	0.0478246	0.0263332	0.0370789		0.00156816	0.00114279	0.00135548	0.00189334	0.000731383	0.00131236			0.0413223	0.0370789		0.00135548	0.00131236
NM_020611	311	121	95	108	134	183	158.5		573	764	668.5	587	657	622		0.0163161	0.0134466	0.0148813	0.0222517	0.0172723	0.019762		0.00119968	0.000995547	0.00109761	0.00151004	0.000947769	0.00122891			0.0148813	0.019762		0.00109761	0.00122891
NM_026943	99	152	344	248	169	530	349.5		766	580	673	837	407	622		0.0204962	0.0486907	0.0345935	0.0280638	0.0500236	0.0390437		0.00160376	0.000755782	0.00117977	0.00215316	0.000587126	0.00137014			0.0345935	0.0390437		0.00117977	0.00137014
NM_001166457	272	122	153	137.5	125	249	187		497	905	701	402	842	622		0.0164509	0.0216561	0.0190535	0.0207572	0.0235017	0.0221294		0.00104056	0.00117928	0.00110992	0.00103413	0.00121464	0.00112439			0.0190535	0.0221294		0.00110992	0.00112439
NM_001166459	272	122	153	137.5	125	249	187		497	905	701	402	842	622		0.0164509	0.0216561	0.0190535	0.0207572	0.0235017	0.0221294		0.00104056	0.00117928	0.00110992	0.00103413	0.00121464	0.00112439			0.0190535	0.0221294		0.00110992	0.00112439
NM_178746	541	90	129	109.5	111	200	155.5		424	911	667.5	494	751	622.5		0.0121359	0.018259	0.0151975	0.0184324	0.0188768	0.0186546		0.000887718	0.0011871	0.00103741	0.0012708	0.00108337	0.00117709			0.0151975	0.0186546		0.00103741	0.00117709
NM_001177353	434	350	748	549	158	545	351.5		538	2655	1596.5	242	1003	622.5		0.0471953	0.105874	0.0765346	0.0262371	0.0514394	0.0388382		0.0011264	0.00345966	0.00229303	0.000622538	0.0014469	0.00103472			0.0765346	0.0388382		0.00229303	0.00103472
NM_008914	506	179	145	162	217	212	214.5		214	1130	672	221	1025	623		0.024137	0.0205237	0.0223304	0.0360345	0.0200094	0.028022		0.000448046	0.00147247	0.000960259	0.000568517	0.00147863	0.00102358			0.0223304	0.028022		0.000960259	0.00102358
NM_026437	338	174	234	204	203	237	220		390	1344	867	380	867	623.5		0.0234628	0.033121	0.0282919	0.0337097	0.022369	0.0280394		0.000816533	0.00175133	0.00128393	0.00097754	0.00125071	0.00111412			0.0282919	0.0280394		0.00128393	0.00111412
NM_011868	339	123	117	120	104	159	131.5		819	1019	919	669	578	623.5		0.0165858	0.0165605	0.0165731	0.01727	0.0150071	0.0161385		0.00171472	0.00132783	0.00152128	0.00172098	0.000833806	0.0012774			0.0165731	0.0161385		0.00152128	0.0012774
NM_001110332	339	123	117	120	104	159	131.5		819	1019	919	669	578	623.5		0.0165858	0.0165605	0.0165731	0.01727	0.0150071	0.0161385		0.00171472	0.00132783	0.00152128	0.00172098	0.000833806	0.0012774			0.0165731	0.0161385		0.00152128	0.0012774
NM_010849	435	350	749	549.5	158	545	351.5		538	2655	1596.5	244	1003	623.5		0.0471953	0.106016	0.0766054	0.0262371	0.0514394	0.0388382		0.0011264	0.00345966	0.00229303	0.000627683	0.0014469	0.00103729			0.0766054	0.0388382		0.00229303	0.00103729
NM_007987	308	406	330	368	290	623	456.5		512	796	654	576	674	625		0.0547465	0.0467091	0.0507278	0.0481568	0.0588013	0.053479		0.00107196	0.00103725	0.0010546	0.00148174	0.000972293	0.00122702			0.0507278	0.053479		0.0010546	0.00122702
NM_008026	433	191	196	193.5	127	205	166		570	1102	836	526	724	625		0.0257551	0.0277424	0.0267488	0.0210893	0.0193487	0.020219		0.00119339	0.00143599	0.00131469	0.00135312	0.00104442	0.00119877			0.0267488	0.020219		0.00131469	0.00119877
NM_172947	176	104	153	128.5	158	229	193.5		588	858	723	493	758	625.5		0.0140237	0.0216561	0.0178399	0.0262371	0.021614	0.0239255		0.00123108	0.00111804	0.00117456	0.00126823	0.00109347	0.00118085			0.0178399	0.0239255		0.00117456	0.00118085
NM_009712	515	276	302	289	256	476	366		363	1362	862.5	270	981	625.5		0.0372168	0.0427459	0.0399814	0.0425108	0.0449269	0.0437188		0.000760004	0.00177478	0.00126739	0.000694568	0.00141516	0.00105486			0.0399814	0.0437188		0.00126739	0.00105486
NM_175451	556	147	147	147	118	267	192.5		421	1284	852.5	366	886	626		0.019822	0.0208068	0.0203144	0.0195948	0.0252006	0.0223977		0.000881437	0.00167315	0.00127729	0.000941525	0.00127812	0.00110982			0.0203144	0.0223977		0.00127729	0.00110982
NM_001033448	857	113	114	113.5	156	112	134		624	1182	903	754	498	626		0.0152373	0.0161359	0.0156866	0.025905	0.010571	0.018238		0.00130645	0.00154023	0.00142334	0.00193964	0.0007184	0.00132902			0.0156866	0.018238		0.00142334	0.00132902
NM_001079830	1104	124	120	122	159	143	151		373	1472	922.5	426	826	626		0.0167206	0.0169851	0.0168529	0.0264032	0.0134969	0.0199501		0.000780941	0.00191812	0.00134953	0.00109587	0.00119156	0.00114372			0.0168529	0.0199501		0.00134953	0.00114372
NM_029495	295	152	192	172	166	1150	658		224	278	251	399	854	626.5		0.0204962	0.0271762	0.0238362	0.0275656	0.108542	0.0680537		0.000468983	0.000362254	0.000415619	0.00102642	0.00123196	0.00112919			0.0238362	0.0680537		0.000415619	0.00112919
NM_019712	89	240	453	346.5	299	781	540		522	587	554.5	771	484	627.5		0.0323625	0.0641189	0.0482407	0.0496513	0.073714	0.0616826		0.0010929	0.000764904	0.000928901	0.00198338	0.000698204	0.00134079			0.0482407	0.0616826		0.000928901	0.00134079
NM_001081041	763	108	182	145	155	179	167		544	1283	913.5	619	636	627.5		0.0145631	0.0257608	0.0201619	0.025739	0.0168948	0.0213169		0.00113896	0.00167184	0.0014054	0.00159236	0.000917475	0.00125492			0.0201619	0.0213169		0.0014054	0.00125492
NM_025645	339	130	180	155	171	304	237.5		472	781	626.5	675	581	628		0.0175297	0.0254777	0.0215037	0.0283959	0.0286928	0.0285443		0.000988215	0.0010177	0.00100296	0.00173642	0.000838133	0.00128728			0.0215037	0.0285443		0.00100296	0.00128728
NM_028017	293	164	155	159.5	164	167	165.5		921	734	827.5	847	409	628		0.0221143	0.0219391	0.0220267	0.0272335	0.0157622	0.0214978		0.00192827	0.000956455	0.00144237	0.00217888	0.000590011	0.00138445			0.0220267	0.0214978		0.00144237	0.00138445
NM_024499	296	149	235	192	177	212	194.5		795	1171	983	759	497	628		0.0200917	0.0332626	0.0266771	0.0293922	0.0200094	0.0247008		0.00166447	0.0015259	0.00159518	0.00195251	0.000716958	0.00133473			0.0266771	0.0247008		0.00159518	0.00133473
NM_145928	251	300	308	304	235	269	252		881	1177	1029	829	427	628		0.0404531	0.0435952	0.0420241	0.0390236	0.0253893	0.0322065		0.00184453	0.00153372	0.00168912	0.00213258	0.000615978	0.00137428			0.0420241	0.0322065		0.00168912	0.00137428
NM_021412	508	97	227	162	94	163	128.5		437	1841	1139	545	711	628		0.0130798	0.0321302	0.022605	0.0156094	0.0153846	0.015497		0.000914936	0.00239896	0.00165695	0.001402	0.00102567	0.00121383			0.022605	0.015497		0.00165695	0.00121383
NM_001242390	583	185	114	149.5	220	258	239		543	468	505.5	884	373	628.5		0.0249461	0.0161359	0.020541	0.0365327	0.0243511	0.0304419		0.00113687	0.000609838	0.000873352	0.00227407	0.000538079	0.00140607			0.020541	0.0304419		0.000873352	0.00140607
NM_134118	289	370	721	545.5	304	897	600.5		491	1166	828.5	474	783	628.5		0.0498921	0.102052	0.0759722	0.0504816	0.0846626	0.0675721		0.00102799	0.00151938	0.00127369	0.00121935	0.00112953	0.00117444			0.0759722	0.0675721		0.00127369	0.00117444
NM_178707	1243	119	109	114	137	182	159.5		277	1294	785.5	294	965	629.5		0.0160464	0.0154282	0.0157373	0.0227499	0.0171779	0.0199639		0.000579948	0.00168618	0.00113306	0.000756307	0.00139208	0.00107419			0.0157373	0.0199639		0.00113306	0.00107419
NM_177780	1849	144	85	114.5	158	86	122		517	1471	994	568	691	629.5		0.0194175	0.0120311	0.0157243	0.0262371	0.00811704	0.0171771		0.00108243	0.00191682	0.00149962	0.00146116	0.000996816	0.00122899			0.0157243	0.0171771		0.00149962	0.00122899
NM_007999	361	128	211	169.5	148	271	209.5		555	757	656	711	549	630		0.01726	0.0298655	0.0235628	0.0245766	0.0255781	0.0250773		0.00116199	0.000986426	0.00107421	0.00182903	0.000791971	0.0013105			0.0235628	0.0250773		0.00107421	0.0013105
NM_198094	704	300	253	276.5	280	354	317		208	1497	852.5	177	1083	630		0.0404531	0.0358103	0.0381317	0.0464962	0.033412	0.0399541		0.000435484	0.0019507	0.00119309	0.000455328	0.0015623	0.00100882			0.0381317	0.0399541		0.00119309	0.00100882
NM_001243123	1499	164	194	179	211	243	227		490	1255	872.5	440	820	630		0.0221143	0.0274593	0.0247868	0.0350382	0.0229353	0.0289868		0.0010259	0.00163536	0.00133063	0.00113189	0.00118291	0.0011574			0.0247868	0.0289868		0.00133063	0.0011574
NM_029832	296	178	155	166.5	209	240	224.5		917	747	832	895	366	630.5		0.0240022	0.0219391	0.0229706	0.0347061	0.0226522	0.0286791		0.0019199	0.000973395	0.00144665	0.00230236	0.000527981	0.00141517			0.0229706	0.0286791		0.00144665	0.00141517
NM_009082	141	813	1822	1317.5	885	4216	2550.5		575	907	741	782	480	631		0.109628	0.257891	0.183759	0.146961	0.397924	0.272442		0.00120386	0.00118189	0.00119288	0.00201167	0.000692434	0.00135205			0.183759	0.272442		0.00119288	0.00135205
NM_001033318	751	130	149	139.5	82	132	107		468	1258	863	551	711	631		0.0175297	0.0210899	0.0193098	0.0136167	0.0124587	0.0130377		0.00097984	0.00163927	0.00130955	0.00141743	0.00102567	0.00122155			0.0193098	0.0130377		0.00130955	0.00122155
NM_134142	224	234	436	335	344	674	509		598	1115	856.5	563	700	631.5		0.0315534	0.0617127	0.046633	0.0571239	0.0636149	0.0603694		0.00125202	0.00145293	0.00135247	0.0014483	0.0010098	0.00122905			0.046633	0.0603694		0.00135247	0.00122905
NM_080446	1055	147	180	163.5	146	121	133.5		662	1554	1108	715	548	631.5		0.019822	0.0254777	0.0226499	0.0242444	0.0114205	0.0178325		0.00138601	0.00202497	0.00170549	0.00183932	0.000790529	0.00131492			0.0226499	0.0178325		0.00170549	0.00131492
NM_001025582	161	162	157	159.5	148	294	221		331	769	550	390	874	632		0.0218447	0.0222222	0.0220334	0.0245766	0.0277489	0.0261627		0.000693006	0.00100206	0.000847535	0.00100326	0.00126081	0.00113204			0.0220334	0.0261627		0.000847535	0.00113204
NM_172277	440	110	207	158.5	61	124	92.5		889	2083	1486	617	647	632		0.0148328	0.0292994	0.0220661	0.0101295	0.0117036	0.0109166		0.00186128	0.0027143	0.00228779	0.00158722	0.000933343	0.00126028			0.0220661	0.0109166		0.00228779	0.00126028
NM_018736	687	96	111	103.5	99	159	129		395	932	663.5	586	679	632.5		0.012945	0.0157113	0.0143281	0.0164397	0.0150071	0.0157234		0.000827002	0.00121446	0.00102073	0.00150747	0.000979505	0.00124349			0.0143281	0.0157234		0.00102073	0.00124349
NM_001113352	1415	90	120	105	96	96	96		494	2093	1293.5	521	744	632.5		0.0121359	0.0169851	0.0145605	0.0159415	0.00906088	0.0125012		0.00103428	0.00272733	0.0018808	0.00134026	0.00107327	0.00120677			0.0145605	0.0125012		0.0018808	0.00120677
NM_008418	509	386	166	276	326	332	329		378	1180	779	441	825	633		0.0520496	0.0234961	0.0377729	0.0541348	0.0313355	0.0427352		0.000791409	0.00153763	0.00116452	0.00113446	0.00119012	0.00116229			0.0377729	0.0427352		0.00116452	0.00116229
NM_026283	459	140	75	107.5	108	138	123		370	1381	875.5	435	831	633		0.0188781	0.0106157	0.0147469	0.0179342	0.013025	0.0154796		0.00077466	0.00179954	0.0012871	0.00111903	0.00119878	0.0011589			0.0147469	0.0154796		0.0012871	0.0011589
NM_178611	134	306	136	221	187	237	212		802	687	744.5	559	708	633.5		0.0412621	0.0192498	0.030256	0.0310528	0.022369	0.0267109		0.00167913	0.000895211	0.00128717	0.00143801	0.00102134	0.00122968			0.030256	0.0267109		0.00128717	0.00122968
NM_027256	945	206	285	245.5	213	298	255.5		451	1329	890	532	735	633.5		0.0277778	0.0403397	0.0340587	0.0353703	0.0281265	0.0317484		0.000944248	0.00173178	0.00133802	0.00136856	0.00106029	0.00121442			0.0340587	0.0317484		0.00133802	0.00121442
NM_026177	327	132	126	129	199	230	214.5		475	828	651.5	440	828	634		0.0177994	0.0178344	0.0178169	0.0330455	0.0217084	0.0273769		0.000994496	0.00107894	0.00103672	0.00113189	0.00119445	0.00116317			0.0178169	0.0273769		0.00103672	0.00116317
NM_001256082	2153	177	298	237.5	157	267	212		600	1891	1245.5	520	748	634		0.0238673	0.0421798	0.0330235	0.0260711	0.0252006	0.0256358		0.00125621	0.00246411	0.00186016	0.00133769	0.00107904	0.00120836			0.0330235	0.0256358		0.00186016	0.00120836
NM_023913	958	118	184	151	155	173	164		522	1258	890	569	700	634.5		0.0159115	0.0260439	0.0209777	0.025739	0.0163285	0.0210337		0.0010929	0.00163927	0.00136608	0.00146374	0.0010098	0.00123677			0.0209777	0.0210337		0.00136608	0.00123677
NM_001024622	159	201	229	215	174	373	273.5		436	843	639.5	517	753	635		0.0271036	0.0324133	0.0297584	0.0288941	0.0352053	0.0320497		0.000912842	0.00109849	0.00100567	0.00132997	0.00108626	0.00120811			0.0297584	0.0320497		0.00100567	0.00120811
NM_054051	397	145	98	121.5	90	85	87.5		485	1071	778	596	674	635		0.0195523	0.0138712	0.0167118	0.0149452	0.00802265	0.0114839		0.00101543	0.00139559	0.00120551	0.00153319	0.000972293	0.00125274			0.0167118	0.0114839		0.00120551	0.00125274
NM_007421	438	174	483	328.5	134	459	296.5		567	1390	978.5	694	576	635		0.0234628	0.0683652	0.045914	0.0222517	0.0433223	0.032787		0.00118711	0.00181127	0.00149919	0.0017853	0.000830921	0.00130811			0.045914	0.032787		0.00149919	0.00130811
NM_001024922	461	152	222	187	176	178	177		684	851	767.5	788	483	635.5		0.0204962	0.0314225	0.0259594	0.0292262	0.0168004	0.0230133		0.00143207	0.00110891	0.00127049	0.00202711	0.000696762	0.00136194			0.0259594	0.0230133		0.00127049	0.00136194
NM_170588	517	171	201	186	182	208	195		602	1040	821	792	479	635.5		0.0230583	0.0284501	0.0257542	0.0302225	0.0196319	0.0249272		0.00126039	0.0013552	0.00130779	0.0020374	0.000690991	0.00136419			0.0257542	0.0249272		0.00130779	0.00136419
NM_170590	517	171	201	186	182	208	195		602	1040	821	792	479	635.5		0.0230583	0.0284501	0.0257542	0.0302225	0.0196319	0.0249272		0.00126039	0.0013552	0.00130779	0.0020374	0.000690991	0.00136419			0.0257542	0.0249272		0.00130779	0.00136419
NM_009763	292	155	87	121	178	198	188		714	345	529.5	952	320	636		0.0209008	0.0123142	0.0166075	0.0295583	0.0186881	0.0241232		0.00149488	0.00044956	0.000972222	0.00244899	0.000461623	0.00145531			0.0166075	0.0241232		0.000972222	0.00145531
NM_025616	334	210	225	217.5	191	242	216.5		824	824	824	842	430	636		0.0283172	0.0318471	0.0300821	0.031717	0.022841	0.027279		0.00172519	0.00107373	0.00139946	0.00216602	0.000620305	0.00139316			0.0300821	0.027279		0.00139946	0.00139316
NM_027264	867	247	180	213.5	161	173	167		437	1817	1127	322	950	636		0.0333064	0.0254777	0.029392	0.0267353	0.0163285	0.0215319		0.000914936	0.00236768	0.00164131	0.000828336	0.00137044	0.00109939			0.029392	0.0215319		0.00164131	0.00109939
NM_001025606	303	260	306	283	115	692	403.5		498	629	563.5	394	879	636.5		0.0350593	0.0433121	0.0391857	0.0190966	0.0653138	0.0422052		0.00104265	0.000819633	0.000931141	0.00101355	0.00126802	0.00114079			0.0391857	0.0422052		0.000931141	0.00114079
NM_026964	198	97	136	116.5	101	231	166		651	534	592.5	890	383	636.5		0.0130798	0.0192498	0.0161648	0.0167718	0.0218027	0.0192873		0.00136298	0.000695841	0.00102941	0.0022895	0.000552505	0.001421			0.0161648	0.0192873		0.00102941	0.001421
NM_001029979	972	252	231	241.5	351	398	374.5		720	812	766	815	458	636.5		0.0339806	0.0326964	0.0333385	0.0582863	0.0375649	0.0479256		0.00150745	0.00105809	0.00128277	0.00209657	0.000660697	0.00137863			0.0333385	0.0479256		0.00128277	0.00137863
NM_028760	442	192	130	161	229	143	186		560	1273	916.5	694	580	637		0.02589	0.0184006	0.0221453	0.0380272	0.0134969	0.0257621		0.00117246	0.00165881	0.00141563	0.0017853	0.000836691	0.00131099			0.0221453	0.0257621		0.00141563	0.00131099
NM_001162489	1075	91	130	110.5	108	117	112.5		620	1790	1205	682	592	637		0.0122708	0.0184006	0.0153357	0.0179342	0.0110429	0.0144886		0.00129808	0.0023325	0.00181529	0.00175443	0.000854002	0.00130421			0.0153357	0.0144886		0.00181529	0.00130421
NM_001199141	583	152	95	123.5	179	216	197.5		363	904	633.5	476	799	637.5		0.0204962	0.0134466	0.0169714	0.0297243	0.020387	0.0250557		0.000760004	0.00117798	0.000968991	0.0012245	0.00115261	0.00118856			0.0169714	0.0250557		0.000968991	0.00118856
NM_007875	391	180	175	177.5	128	194	161		645	938	791.5	690	586	638		0.0242718	0.02477	0.0245209	0.0212554	0.0183105	0.019783		0.00135042	0.00122228	0.00128635	0.00177501	0.000845346	0.00131018			0.0245209	0.019783		0.00128635	0.00131018
NM_001170785	958	177	258	217.5	198	178	188		541	1564	1052.5	658	618	638		0.0238673	0.036518	0.0301927	0.0328794	0.0168004	0.0248399		0.00113268	0.00203801	0.00158534	0.00169269	0.000891509	0.0012921			0.0301927	0.0248399		0.00158534	0.0012921
NM_001256083	2147	177	298	237.5	157	267	212		600	1891	1245.5	528	748	638		0.0238673	0.0421798	0.0330235	0.0260711	0.0252006	0.0256358		0.00125621	0.00246411	0.00186016	0.00135827	0.00107904	0.00121865			0.0330235	0.0256358		0.00186016	0.00121865
NM_008663	2158	177	298	237.5	157	267	212		606	1891	1248.5	528	748	638		0.0238673	0.0421798	0.0330235	0.0260711	0.0252006	0.0256358		0.00126877	0.00246411	0.00186644	0.00135827	0.00107904	0.00121865			0.0330235	0.0256358		0.00186644	0.00121865
NM_027353	323	164	141	152.5	180	160	170		757	589	673	946	332	639		0.0221143	0.0199575	0.0210359	0.0298904	0.0151015	0.0224959		0.00158491	0.00076751	0.00117621	0.00243356	0.000478933	0.00145625			0.0210359	0.0224959		0.00117621	0.00145625
NM_027855	204	107	147	127	81	278	179.5		631	907	769	605	673	639		0.0144283	0.0208068	0.0176175	0.0134507	0.0262388	0.0198447		0.00132111	0.00118189	0.0012515	0.00155635	0.00097085	0.0012636			0.0176175	0.0198447		0.0012515	0.0012636
NM_011586	2016	210	253	231.5	207	199	203		635	1407	1021	693	585	639		0.0283172	0.0358103	0.0320637	0.034374	0.0187824	0.0265782		0.00132948	0.00183342	0.00158145	0.00178272	0.000843904	0.00131331			0.0320637	0.0265782		0.00158145	0.00131331
NM_028299	327	154	177	165.5	206	326	266		272	844	558	385	894	639.5		0.0207659	0.0250531	0.0229095	0.0342079	0.0307692	0.0324886		0.00056948	0.00109979	0.000834636	0.000990402	0.00128966	0.00114003			0.0229095	0.0324886		0.000834636	0.00114003
NM_172308	958	177	258	217.5	198	178	188		542	1587	1064.5	658	621	639.5		0.0238673	0.036518	0.0301927	0.0328794	0.0168004	0.0248399		0.00113477	0.00206798	0.00160137	0.00169269	0.000895836	0.00129426			0.0301927	0.0248399		0.00160137	0.00129426
NM_011546	1098	208	93	150.5	63	67	65		584	1619	1101.5	250	1029	639.5		0.0280475	0.0131635	0.0206055	0.0104616	0.00632374	0.00839269		0.00122271	0.00210967	0.00166619	0.000643118	0.00148441	0.00106376			0.0206055	0.00839269		0.00166619	0.00106376
NM_021876	422	217	238	227.5	213	308	260.5		580	1338	959	435	845	640		0.0292611	0.0336872	0.0314741	0.0353703	0.0290703	0.0322203		0.00121433	0.00174351	0.00147892	0.00111903	0.00121897	0.001169			0.0314741	0.0322203		0.00147892	0.001169
NM_001256081	2196	177	298	237.5	157	266	211.5		592	1885	1238.5	526	755	640.5		0.0238673	0.0421798	0.0330235	0.0260711	0.0251062	0.0255886		0.00123946	0.00245629	0.00184787	0.00135312	0.00108914	0.00122113			0.0330235	0.0255886		0.00184787	0.00122113
NM_009069	200	121	110	115.5	167	162	164.5		371	937	654	664	618	641		0.0163161	0.0155697	0.0159429	0.0277317	0.0152902	0.0215109		0.000776754	0.00122098	0.000998866	0.00170812	0.000891509	0.00129982			0.0159429	0.0215109		0.000998866	0.00129982
NM_027946	323	407	425	416	391	717	554		348	1024	686	528	755	641.5		0.0548813	0.0601557	0.0575185	0.0649286	0.0676734	0.066301		0.000728599	0.00133435	0.00103147	0.00135827	0.00108914	0.0012237			0.0575185	0.066301		0.00103147	0.0012237
NM_021604	2015	153	114	133.5	155	217	186		621	1134	877.5	684	599	641.5		0.0206311	0.0161359	0.0183835	0.025739	0.0204814	0.0231102		0.00130017	0.00147768	0.00138893	0.00175957	0.0008641	0.00131184			0.0183835	0.0231102		0.00138893	0.00131184
NM_016883	212	361	406	383.5	452	632	542		806	833	819.5	782	502	642		0.0486785	0.0574664	0.0530725	0.0750581	0.0596508	0.0673544		0.0016875	0.00108546	0.00138648	0.00201167	0.00072417	0.00136792			0.0530725	0.0673544		0.00138648	0.00136792
NM_001081213	879	206	173	189.5	169	270	219.5		403	1285	844	386	898	642		0.0277778	0.0244869	0.0261323	0.0280638	0.0254837	0.0267737		0.000843751	0.00167445	0.0012591	0.000992975	0.00129543	0.0011442			0.0261323	0.0267737		0.0012591	0.0011442
NM_053170	1121	124	121	122.5	160	146	153		374	1528	951	432	852	642		0.0167206	0.0171267	0.0169236	0.0265692	0.0137801	0.0201747		0.000783035	0.00199109	0.00138706	0.00111131	0.00122907	0.00117019			0.0169236	0.0201747		0.00138706	0.00117019
NM_001113353	1460	92	123	107.5	100	99	99.5		500	2121	1310.5	532	752	642		0.0124056	0.0174098	0.0149077	0.0166058	0.00934403	0.0129749		0.00104684	0.00276382	0.00190533	0.00136856	0.00108481	0.00122668			0.0149077	0.0129749		0.00190533	0.00122668
NM_009592	733	305	225	265	315	226	270.5		343	1488	915.5	390	895	642.5		0.0411273	0.0318471	0.0364872	0.0523082	0.0213308	0.0368195		0.000718131	0.00193897	0.00132855	0.00100326	0.0012911	0.00114718			0.0364872	0.0368195		0.00132855	0.00114718
NM_026353	127	128	331	229.5	123	309	216		953	1199	1076	835	450	642.5		0.01726	0.0468507	0.0320553	0.0204251	0.0291647	0.0247949		0.00199527	0.00156238	0.00177883	0.00214801	0.000649157	0.00139859			0.0320553	0.0247949		0.00177883	0.00139859
NM_023429	228	626	699	662.5	549	998	773.5		463	1233	848	375	911	643		0.0844121	0.0989384	0.0916753	0.0911657	0.0941954	0.0926806		0.000969372	0.00160669	0.00128803	0.000964677	0.00131418	0.00113943			0.0916753	0.0926806		0.00128803	0.00113943
NM_198162	950	142	141	141.5	177	168	172.5		318	1437	877.5	331	955	643		0.0191478	0.0199575	0.0195527	0.0293922	0.0158565	0.0226244		0.000665789	0.00187252	0.00126915	0.000851489	0.00137765	0.00111457			0.0195527	0.0226244		0.00126915	0.00111457
NM_001170786	958	177	258	217.5	198	178	188		541	1574	1057.5	667	619	643		0.0238673	0.036518	0.0301927	0.0328794	0.0168004	0.0248399		0.00113268	0.00205104	0.00159186	0.00171584	0.000892951	0.0013044			0.0301927	0.0248399		0.00159186	0.0013044
NM_145588	641	130	139	134.5	198	143	170.5		639	649	644	989	298	643.5		0.0175297	0.0196745	0.0186021	0.0328794	0.0134969	0.0231882		0.00133786	0.000845694	0.00109178	0.00254418	0.000429886	0.00148703			0.0186021	0.0231882		0.00109178	0.00148703
NM_172505	572	179	210	194.5	291	194	242.5		644	1523	1083.5	665	624	644.5		0.024137	0.029724	0.0269305	0.0483228	0.0183105	0.0333167		0.00134833	0.00198458	0.00166645	0.00171069	0.000900164	0.00130543			0.0269305	0.0333167		0.00166645	0.00130543
NM_134125	528	196	118	157	239	262	250.5		544	489	516.5	911	379	645		0.0264293	0.0167021	0.0215657	0.0396878	0.0247286	0.0322082		0.00113896	0.000637202	0.000888081	0.00234352	0.000546734	0.00144513			0.0215657	0.0322082		0.000888081	0.00144513
NM_011482	109	209	488	348.5	196	744	470		456	809	632.5	528	762	645		0.0281823	0.0690729	0.0486276	0.0325473	0.0702218	0.0513846		0.000954716	0.00105419	0.00100445	0.00135827	0.00109924	0.00122875			0.0486276	0.0513846		0.00100445	0.00122875
NM_172790	1057	303	284	293.5	387	266	326.5		312	2121	1216.5	375	915	645		0.0408576	0.0401982	0.0405279	0.0642644	0.0251062	0.0446853		0.000653227	0.00276382	0.00170852	0.000964677	0.00131995	0.00114231			0.0405279	0.0446853		0.00170852	0.00114231
NM_033581	915	210	179	194.5	160	261	210.5		427	1050	738.5	355	936	645.5		0.0283172	0.0253362	0.0268267	0.0265692	0.0246343	0.0256018		0.000893999	0.00136823	0.00113111	0.000913228	0.00135025	0.00113174			0.0268267	0.0256018		0.00113111	0.00113174
NM_144787	1035	138	156	147	144	275	209.5		469	1035	752	382	909	645.5		0.0186084	0.0220807	0.0203445	0.0239123	0.0259556	0.024934		0.000981934	0.00134868	0.00116531	0.000982685	0.0013113	0.00114699			0.0203445	0.024934		0.00116531	0.00114699
NM_021398	483	168	58	113	174	108	141		918	556	737	768	525	646.5		0.0226537	0.00820948	0.0154316	0.0288941	0.0101935	0.0195438		0.00192199	0.000724508	0.00132325	0.00197566	0.00075735	0.0013665			0.0154316	0.0195438		0.00132325	0.0013665
NM_144874	394	86	134	110	110	237	173.5		395	825	610	504	790	647		0.0115965	0.0189667	0.0152816	0.0182664	0.022369	0.0203177		0.000827002	0.00107503	0.000951018	0.00129653	0.00113963	0.00121808			0.0152816	0.0203177		0.000951018	0.00121808
NM_172561	208	197	235	216	161	376	268.5		659	601	630	823	472	647.5		0.0265642	0.0332626	0.0299134	0.0267353	0.0354884	0.0311119		0.00137973	0.000783147	0.00108144	0.00211715	0.000680893	0.00139902			0.0299134	0.0311119		0.00108144	0.00139902
NM_027498	1350	225	241	233	229	286	257.5		490	1468	979	462	833	647.5		0.0303398	0.0341118	0.0322258	0.0380272	0.0269939	0.0325105		0.0010259	0.00191291	0.00146941	0.00118848	0.00120166	0.00119507			0.0322258	0.0325105		0.00146941	0.00119507
NM_001159318	666	161	118	139.5	170	177	173.5		415	698	556.5	537	759	648		0.0217098	0.0167021	0.0192059	0.0282298	0.016706	0.0224679		0.000868875	0.000909545	0.00088921	0.00138142	0.00109491	0.00123816			0.0192059	0.0224679		0.00088921	0.00123816
NM_001159317	621	161	118	139.5	170	177	173.5		415	698	556.5	537	759	648		0.0217098	0.0167021	0.0192059	0.0282298	0.016706	0.0224679		0.000868875	0.000909545	0.00088921	0.00138142	0.00109491	0.00123816			0.0192059	0.0224679		0.00088921	0.00123816
NM_013494	457	133	79	106	101	152	126.5		496	777	636.5	671	625	648		0.0179342	0.0111819	0.014558	0.0167718	0.0143464	0.0155591		0.00103846	0.00101249	0.00102548	0.00172613	0.000901607	0.00131387			0.014558	0.0155591		0.00102548	0.00131387
NM_031181	448	316	268	292	347	219	283		618	980	799	799	497	648		0.0426106	0.0379335	0.040272	0.0576221	0.0206701	0.0391461		0.00129389	0.00127701	0.00128545	0.00205541	0.000716958	0.00138618			0.040272	0.0391461		0.00128545	0.00138618
NM_018811	406	243	224	233.5	237	362	299.5		494	1162	828	446	850	648		0.032767	0.0317056	0.0322363	0.0393557	0.0341671	0.0367614		0.00103428	0.00151417	0.00127422	0.00114732	0.00122618	0.00118675			0.0322363	0.0367614		0.00127422	0.00118675
NM_028904	597	68	132	100	62	181	121.5		335	1383	859	162	1134	648		0.00916936	0.0186837	0.0139265	0.0102956	0.0170835	0.0136896		0.000701381	0.00180215	0.00125177	0.000416741	0.00163587	0.00102631			0.0139265	0.0136896		0.00125177	0.00102631
NM_001168248	597	68	132	100	62	181	121.5		335	1383	859	162	1134	648		0.00916936	0.0186837	0.0139265	0.0102956	0.0170835	0.0136896		0.000701381	0.00180215	0.00125177	0.000416741	0.00163587	0.00102631			0.0139265	0.0136896		0.00125177	0.00102631
NM_172517	519	143	190	166.5	200	173	186.5		522	1259	890.5	698	598	648		0.0192826	0.0268931	0.0230879	0.0332116	0.0163285	0.02477		0.0010929	0.00164057	0.00136673	0.00179559	0.000862657	0.00132912			0.0230879	0.02477		0.00136673	0.00132912
NM_172134	293	73	187	130	51	129	90		822	3833	2327.5	508	788	648		0.00984358	0.0264685	0.018156	0.00846895	0.0121756	0.0103223		0.001721	0.00499468	0.00335784	0.00130682	0.00113675	0.00122178			0.018156	0.0103223		0.00335784	0.00122178
NM_011279	94	65	138	101.5	50	206	128		790	513	651.5	795	503	649		0.00876483	0.0195329	0.0141489	0.00830289	0.0194431	0.013873		0.001654	0.000668476	0.00116124	0.00204512	0.000725613	0.00138536			0.0141489	0.013873		0.00116124	0.00138536
NM_026156	836	257	273	265	320	292	306		766	967	866.5	784	514	649		0.0346548	0.0386412	0.036648	0.0531385	0.0275602	0.0403493		0.00160376	0.00126007	0.00143191	0.00201682	0.000741481	0.00137915			0.036648	0.0403493		0.00143191	0.00137915
NM_011932	261	301	312	306.5	84	304	194		1378	2055	1716.5	355	944	649.5		0.0405879	0.0441614	0.0423746	0.0139489	0.0286928	0.0213208		0.00288508	0.00267781	0.00278145	0.000913228	0.00136179	0.00113751			0.0423746	0.0213208		0.00278145	0.00113751
NM_013795	84	379	1029	704	381	1261	821		720	787	753.5	694	606	650		0.0511057	0.145648	0.0983766	0.063268	0.119018	0.0911432		0.00150745	0.00102552	0.00126648	0.0017853	0.000874198	0.00132975			0.0983766	0.0911432		0.00126648	0.00132975
NM_024267	1063	181	308	244.5	219	188	203.5		541	2290	1415.5	722	578	650		0.0244067	0.0435952	0.0340009	0.0363667	0.0177442	0.0270554		0.00113268	0.00298404	0.00205836	0.00185733	0.000833806	0.00134557			0.0340009	0.0270554		0.00205836	0.00134557
NM_001037941	242	392	290	341	332	595	463.5		602	468	535	711	591	651		0.0528587	0.0410474	0.0469531	0.0551312	0.0561586	0.0556449		0.00126039	0.000609838	0.000935115	0.00182903	0.000852559	0.00134079			0.0469531	0.0556449		0.000935115	0.00134079
NM_023231	334	119	121	120	139	126	132.5		713	1122	917.5	880	422	651		0.0160464	0.0171267	0.0165865	0.023082	0.0118924	0.0174872		0.00149279	0.00146205	0.00147742	0.00226378	0.000608765	0.00143627			0.0165865	0.0174872		0.00147742	0.00143627
NM_178876	1022	120	229	174.5	136	205	170.5		379	1691	1035	439	863	651		0.0161812	0.0324133	0.0242973	0.0225839	0.0193487	0.0209663		0.000793503	0.0022035	0.0014985	0.00112932	0.00124494	0.00118713			0.0242973	0.0209663		0.0014985	0.00118713
NM_183021	1919	146	201	173.5	119	154	136.5		537	1680	1108.5	521	781	651		0.0196872	0.0284501	0.0240686	0.0197609	0.0145352	0.017148		0.0011243	0.00218916	0.00165673	0.00134026	0.00112665	0.00123345			0.0240686	0.017148		0.00165673	0.00123345
[truncated: 5,433 more rows]

## Sheet: MyDD Induction (B)
		Raw Read Counts Ribosome Reads							Raw Read Counts mRNA Reads							Normalized Read Counts Ribosome Reads					Normalized Read Counts mRNA Reads						Average Normalized Ribosome Reads			Average Normalized mRNA Reads
[truncated: 7,511 more rows]
