# Supplementary material for: Global analysis of gene expression reveals mRNA superinduction is required for the inducible immune response to a bacterial pathogen
Source: eLife journal article supplement (doi:10.7554/elife.22707), 2017-04-06
Supplement: supp [file elife-22707-supp-v1.zip › elife_poa_e22707_Figure_4_Source_Data.xlsx]

## Sheet: uninfected
		Raw Read Counts Ribosome Reads					Raw Read Counts mRNA Reads							Read Density Ribosome Reads					Read Density mRNA Reads							Normalized Read Density Ribosome Reads					Normalized Read Density mRNA Reads
		ribo_uninf	ribo_uninf	ribo_uninf	ribo_avg		mRNA_uninf	mRNA_uninf	mRNA_uninf	mRNA_avg				ribo_uninf	ribo_uninf	ribo_uninf			mRNA_uninf	mRNA_uninf	mRNA_uninf					ribo_uninf	ribo_uninf	ribo_uninf	ribo_avg		mRNA_uninf	mRNA_uninf	mRNA_uninf	mRNA_avg
Gene RefSeq	Length	RVKB013A	RVKB016A	RVKB020A	ribo_avg		RVKB015A	RVKB018A	RVKB022A	mRNA_avg			read density = no. of reads/length of CDS	RVKB013A	RVKB016A	RVKB020A			RVKB015A	RVKB018A	RVKB022A				normalized read density = read density / sum mitochondrial reads	RVKB013A	RVKB016A	RVKB020A	ribo_avg		RVKB015A	RVKB018A	RVKB022A	mRNA_avg		ribo/mRNA
NM_009606	358	9936	21626	13565	15042.3		780	0	5	261.667				27.7542	60.4078	37.8911			2.17877	0	0.0139665					0.0129814	0.00441384	0.00222535	0.00654019		2.752e-06	0	9.27208e-09	9.20425e-07		7105.62
NM_001198561	196	2234	877	1089	1400		167	40	183	130				11.398	4.47449	5.55612			0.852041	0.204082	0.933673					0.00533113	0.000326939	0.000326312	0.00199479		1.07621e-06	2.15611e-07	6.19848e-07	6.37223e-07		3130.45
NM_175655	84	6861	12454	14085	11133.3		505	787	1180	824				81.6786	148.262	167.679			6.0119	9.36905	14.0476					0.0382033	0.0108331	0.0098478	0.0196281		7.59363e-06	9.89834e-06	9.32595e-06	8.93931e-06		2195.7
NM_030082	107	704	3325	2679	2236		55	96	383	178				6.57944	31.0748	25.0374			0.514019	0.897196	3.57944					0.00307738	0.00227055	0.00147045	0.00227279		6.49256e-07	9.47882e-07	2.37632e-06	1.32449e-06		1715.98
NM_177688	110	2062	4975	3666	3567.67		245	242	674	387				18.7455	45.2273	33.3273			2.22727	2.2	6.12727					0.00876775	0.00330464	0.00195732	0.00467657		2.81326e-06	2.32429e-06	4.06778e-06	3.06844e-06		1524.09
NM_206882	135	612	2614	2256	1827.33		41	114	365	173.333				4.53333	19.363	16.7111			0.303704	0.844444	2.7037					0.00212036	0.0014148	0.000981448	0.00150554		3.83608e-07	8.9215e-07	1.79494e-06	1.02357e-06		1470.88
NM_013590	129	31632	47554	36618	38601.3		2445	4885	11983	6437.67				245.209	368.636	283.86			18.9535	37.8682	92.8915					0.114691	0.0269352	0.0166712	0.0527658		2.39401e-05	4.00075e-05	6.16689e-05	4.18722e-05		1260.16
NM_175663	108	2385	7773	6354	5504		90	489	1689	756				22.0833	71.9722	58.8333			0.833333	4.52778	15.6389					0.010329	0.00525882	0.0034553	0.0063477		1.05258e-06	4.78357e-06	1.03824e-05	5.40617e-06		1174.16
NM_013706	55	2970	2328	1562	2286.67		620	241	562	474.333				54	42.3273	28.4			11.2727	4.38182	10.2182					0.0252572	0.00309274	0.00166794	0.010006		1.42386e-05	4.62936e-06	6.78366e-06	8.55053e-06		1170.22
NM_139149	499	1394	2057	1606	1685.67		320	231	249	266.667				2.79359	4.12224	3.21844			0.641283	0.462926	0.498998					0.00130664	0.000301202	0.00018902	0.000598952		8.10003e-07	4.89078e-07	3.31275e-07	5.43452e-07		1102.13
NM_001143689	335	4704	2622	3188	3504.67		1275	319	867	820.333				14.0418	7.82687	9.51642			3.80597	0.952239	2.58806					0.00656772	0.000571888	0.000558902	0.00256617		4.80731e-06	1.00603e-06	1.71816e-06	2.5105e-06		1022.17
NM_023372	51	5934	2995	1992	3640.33		1201	530	1536	1089				116.353	58.7255	39.0588			23.549	10.3922	30.1176					0.0544214	0.00429092	0.00229393	0.0203354		2.97447e-05	1.09793e-05	1.99945e-05	2.02395e-05		1004.74
NM_001048058	51	5934	2995	1992	3640.33		1201	530	1536	1089				116.353	58.7255	39.0588			23.549	10.3922	30.1176					0.0544214	0.00429092	0.00229393	0.0203354		2.97447e-05	1.09793e-05	1.99945e-05	2.02395e-05		1004.74
NM_001048057	51	5934	2995	1992	3640.33		1201	530	1536	1089				116.353	58.7255	39.0588			23.549	10.3922	30.1176					0.0544214	0.00429092	0.00229393	0.0203354		2.97447e-05	1.09793e-05	1.99945e-05	2.02395e-05		1004.74
NM_178213	111	710	2999	3107	2272		173	210	724	369				6.3964	27.018	27.991			1.55856	1.89189	6.52252					0.00299177	0.00197414	0.00164392	0.00220327		1.96861e-06	1.99877e-06	4.33018e-06	2.76585e-06		796.598
NM_023124	307	5787	2144	3139	3690		1482	945	1775	1400.67				18.8502	6.98371	10.2248			4.82736	3.07818	5.78176					0.00881673	0.000510282	0.000600502	0.00330917		6.09743e-06	3.25207e-06	3.8384e-06	4.39597e-06		752.774
NM_207648	307	5787	2144	3139	3690		1482	945	1775	1400.67				18.8502	6.98371	10.2248			4.82736	3.07818	5.78176					0.00881673	0.000510282	0.000600502	0.00330917		6.09743e-06	3.25207e-06	3.8384e-06	4.39597e-06		752.774
NM_016740	79	1164	2989	2292	2148.33		376	278	725	459.667				14.7342	37.8354	29.0127			4.75949	3.51899	9.17722					0.00689157	0.00276454	0.00170392	0.00378668		6.01171e-06	3.71779e-06	6.09258e-06	5.27403e-06		717.986
NM_001165971	301	1282	2007	1388	1559		426	263	572	420.333				4.25914	6.66777	4.6113			1.41528	0.873754	1.90033					0.00199211	0.000487197	0.000270823	0.000916711		1.78764e-06	9.23116e-07	1.26159e-06	1.32412e-06		692.318
NM_001039392	25	1424	1678	766	1289.33		659	140	372	390.333				56.96	67.12	30.64			26.36	5.6	14.88					0.0266417	0.00490428	0.00179949	0.0111152		3.32953e-05	5.91637e-06	9.87855e-06	1.63634e-05		679.27
NM_001190327	25	1424	1678	766	1289.33		659	140	372	390.333				56.96	67.12	30.64			26.36	5.6	14.88					0.0266417	0.00490428	0.00179949	0.0111152		3.32953e-05	5.91637e-06	9.87855e-06	1.63634e-05		679.27
NM_025284	25	1424	1678	766	1289.33		659	140	372	390.333				56.96	67.12	30.64			26.36	5.6	14.88					0.0266417	0.00490428	0.00179949	0.0111152		3.32953e-05	5.91637e-06	9.87855e-06	1.63634e-05		679.27
NM_010391	306	2890	1753	2366	2336.33		548	666	1511	908.333				9.44444	5.72876	7.73203			1.79085	2.17647	4.93791					0.00441742	0.000418585	0.000454104	0.00176337		2.26202e-06	2.29943e-06	3.27818e-06	2.61321e-06		674.791
NM_018730	86	1130	1377	1177	1228		473	156	416	348.333				13.1395	16.0116	13.686			5.5	1.81395	4.83721					0.00614571	0.00116993	0.000803785	0.00270648		6.94704e-06	1.91643e-06	3.21133e-06	4.02493e-06		672.427
NM_013602	42	633	842	911	795.333		258	68	322	216				15.0714	20.0476	21.6905			6.14286	1.61905	7.66667					0.00704931	0.00146483	0.00127389	0.00326268		7.75903e-06	1.71051e-06	5.08975e-06	4.8531e-06		672.287
NM_175666	107	1560	4226	3676	3154		537	509	1071	705.667				14.5794	39.4953	34.3551			5.01869	4.75701	10.0093					0.0068192	0.00288582	0.00201769	0.00390757		6.3391e-06	5.02575e-06	6.64501e-06	6.00329e-06		650.904
NM_001201460	315	4871	2317	2834	3340.67		1553	965	1764	1427.33				15.4635	7.35556	8.99683			4.93016	3.06349	5.6					0.00723269	0.000537451	0.000528386	0.00276618		6.22728e-06	3.23656e-06	3.71773e-06	4.39386e-06		629.555
NM_010394	315	4871	2317	2834	3340.67		1553	965	1764	1427.33				15.4635	7.35556	8.99683			4.93016	3.06349	5.6					0.00723269	0.000537451	0.000528386	0.00276618		6.22728e-06	3.23656e-06	3.71773e-06	4.39386e-06		629.555
NM_001198560	291	4786	2187	2722	3231.67		1552	956	1753	1420.33				16.4467	7.51546	9.35395			5.33333	3.28522	6.02405					0.00769258	0.000549135	0.00054936	0.00293036		6.73652e-06	3.47082e-06	3.99926e-06	4.73553e-06		618.802
NM_025983	33	535	778	418	577		183	96	323	200.667				16.2121	23.5758	12.6667			5.54545	2.90909	9.78788					0.00758284	0.00172262	0.000743917	0.00334979		7.00445e-06	3.07344e-06	6.49799e-06	5.52529e-06		606.265
NM_008207	344	1050	793	1152	998.333		525	167	280	324				3.05233	2.30523	3.34884			1.52616	0.485465	0.813953					0.00142765	0.000168437	0.000196678	0.00059759		1.92769e-06	5.12891e-07	5.40368e-07	9.93651e-07		601.408
NM_026069	78	2410	2242	2000	2217.33		875	527	1124	842				30.8974	28.7436	25.641			11.2179	6.75641	14.4103					0.0144516	0.00210022	0.0015059	0.00601923		1.41694e-05	7.13811e-06	9.5667e-06	1.02914e-05		584.88
NM_010395	360	1440	602	637	893		359	349	846	518				4	1.67222	1.76944			0.997222	0.969444	2.35					0.00187091	0.000122185	0.00010392	0.000699004		1.25959e-06	1.02421e-06	1.56012e-06	1.28131e-06		545.54
NM_175656	84	7093	12924	14572	11529.7		845	3305	7701	3950.33				84.4405	153.857	173.476			10.0595	39.3452	91.6786					0.0394951	0.0112419	0.0101883	0.0203084		1.27062e-05	4.1568e-05	6.08637e-05	3.83793e-05		529.151
NM_001199967	355	2811	1782	2061	2218		1363	611	1035	1003				7.91831	5.01972	5.80563			3.83944	1.72113	2.91549					0.00370361	0.000366778	0.000340966	0.00147045		4.84959e-06	1.81836e-06	1.93554e-06	2.86783e-06		512.74
NM_025352	63	241	438	254	311		105	98	114	105.667				3.8254	6.95238	4.03175			1.66667	1.55556	1.80952					0.00178924	0.000507992	0.000236785	0.000844673		2.10516e-06	1.64343e-06	1.20131e-06	1.64997e-06		511.932
NM_010128	141	1865	2939	1738	2180.67		736	921	757	804.667				13.227	20.844	12.3262			5.21986	6.53191	5.36879					0.0061866	0.00152301	0.000723923	0.00281118		6.59319e-06	6.90093e-06	3.56424e-06	5.68612e-06		494.393
NM_178195	107	7293	17812	14669	13258		760	3841	9770	4790.33				68.1589	166.467	137.093			7.1028	35.8972	91.3084					0.0318797	0.0121633	0.00805153	0.0173649		8.97154e-06	3.79252e-05	6.06179e-05	3.58382e-05		484.535
NM_001177467	266	2565	1651	1902	2039.33		1391	542	973	968.667				9.64286	6.20677	7.15038			5.22932	2.03759	3.65789					0.00451022	0.000453512	0.000419943	0.00179456		6.60515e-06	2.15271e-06	2.42841e-06	3.72875e-06		481.276
NM_023409	130	6972	5610	2896	5159.33		2161	1873	4963	2999				53.6308	43.1538	22.2769			16.6231	14.4077	38.1769					0.0250846	0.00315314	0.00130833	0.00984867		2.09966e-05	1.52216e-05	2.53449e-05	2.05211e-05		479.93
NM_178198	107	6856	18693	15676	13741.7		1051	3855	9164	4690				64.0748	174.701	146.505			9.82243	36.028	85.6449					0.0299695	0.0127649	0.00860426	0.0171129		1.24067e-05	3.80634e-05	5.6858e-05	3.5776e-05		478.334
NM_023211	39	767	973	593	777.667		143	275	757	391.667				19.6667	24.9487	15.2051			3.66667	7.05128	19.4103					0.00919863	0.00182294	0.000893001	0.00397152		4.63136e-06	7.44964e-06	1.28861e-05	8.32237e-06		477.211
NM_010441	89	353	355	274	327.333		160	78	238	158.667				3.96629	3.98876	3.07865			1.79775	0.876404	2.67416					0.00185514	0.000291448	0.00018081	0.0007758		2.27074e-06	9.25916e-07	1.77532e-06	1.65733e-06		468.104
NM_026381	113	1600	1319	1150	1356.33		314	628	1389	777				14.1593	11.6726	10.177			2.77876	5.55752	12.292					0.00662268	0.000852884	0.000597697	0.00269109		3.50985e-06	5.87149e-06	8.16045e-06	5.84726e-06		460.23
NM_175657_dup1	84	7205	12310	14752	11422.3		1163	3854	8530	4515.67				85.7738	146.548	175.619			13.8452	45.881	101.548					0.0401187	0.0107078	0.0103142	0.0203802		1.74879e-05	4.84729e-05	6.74155e-05	4.44588e-05		458.407
NM_178210	84	7220	13360	15355	11978.3		912	4004	9185	4700.33				85.9524	159.048	182.798			10.8571	47.6667	109.345					0.0402022	0.0116212	0.0107358	0.0208531		1.37136e-05	5.03595e-05	7.25922e-05	4.55551e-05		457.754
NM_001163769	220	612	509	416	512.333		258	193	347	266				2.78182	2.31364	1.89091			1.17273	0.877273	1.57727					0.00130113	0.000169051	0.000111054	0.000527079		1.48127e-06	9.26833e-07	1.04712e-06	1.15174e-06		457.636
NM_153173	84	7371	13644	15955	12323.3		983	4070	9469	4840.67				87.75	162.429	189.94			11.7024	48.4524	112.726					0.041043	0.0118682	0.0111553	0.0213555		1.47813e-05	5.11896e-05	7.48368e-05	4.69359e-05		454.993
NM_019932	86	2562	3731	2892	3061.67		1156	865	1913	1311.33				29.7907	43.3837	33.6279			13.4419	10.0581	22.2442					0.0139339	0.00316993	0.00197498	0.00635961		1.69784e-05	1.06264e-05	1.47675e-05	1.41241e-05		450.267
NM_178211	84	7425	14314	16581	12773.3		1019	4218	9817	5018				88.3929	170.405	197.393			12.131	50.2143	116.869					0.0413437	0.012451	0.0115929	0.0217959		1.53226e-05	5.30511e-05	7.75871e-05	4.86536e-05		447.981
NM_133626	682	554	1344	611	836.333		279	322	279	293.333				0.812317	1.97067	0.895894			0.409091	0.472141	0.409091					0.000379942	0.000143992	5.26161e-05	0.000192183		5.16722e-07	4.98814e-07	2.71588e-07	4.29041e-07		447.937
NM_009127	336	361	459	104	308		218	157	40	138.333				1.0744	1.36607	0.309524			0.64881	0.467262	0.119048					0.000502528	9.98152e-05	1.81784e-05	0.000206841		8.1951e-07	4.93659e-07	7.90335e-08	4.64068e-07		445.712
NM_013651	466	298	401	391	363.333		171	83	198	150.667				0.639485	0.860515	0.839056			0.366953	0.178112	0.424893					0.000299104	6.28756e-05	4.9278e-05	0.000137086		4.63497e-07	1.88174e-07	2.82078e-07	3.1125e-07		440.437
NM_178192	84	7238	13495	15650	12127.7		1010	4171	9584	4921.67				86.1667	160.655	186.31			12.0238	49.6548	114.095					0.0403025	0.0117386	0.010942	0.0209944		1.51873e-05	5.246e-05	7.57457e-05	4.77976e-05		439.234
NM_008019	89	260	539	339	379.333		104	160	170	144.667				2.92135	6.05618	3.80899			1.16854	1.79775	1.91011					0.00136639	0.000442509	0.000223703	0.000677535		1.47598e-06	1.89931e-06	1.26809e-06	1.54779e-06		437.742
NM_178193	84	7277	13751	15650	12226		1013	4212	9951	5058.67				86.631	163.702	186.31			12.0595	50.1429	118.464					0.0405196	0.0119613	0.010942	0.021141		1.52324e-05	5.29756e-05	7.86462e-05	4.89514e-05		431.877
NM_178208	84	7415	13532	15312	12086.3		1124	4406	10090	5206.67				88.2738	161.095	182.286			13.381	52.4524	120.119					0.041288	0.0117708	0.0107057	0.0212548		1.69015e-05	5.54156e-05	7.97448e-05	5.06873e-05		419.333
NM_011070	135	250	271	176	232.333		159	65	124	116				1.85185	2.00741	1.3037			1.17778	0.481481	0.918519					0.000866161	0.000146676	7.65668e-05	0.000363135		1.48765e-06	5.08682e-07	6.09787e-07	8.68706e-07		418.018
NM_009696	292	12113	14204	9358	11891.7		6862	3184	8655	6233.67				41.4829	48.6438	32.0479			23.5	10.9041	29.6404					0.0194027	0.00355428	0.00188218	0.00827971		2.96828e-05	1.15201e-05	1.96777e-05	2.02935e-05		407.997
NM_001109971	49	575	1409	624	869.333		190	327	656	391				11.7347	28.7551	12.7347			3.87755	6.67347	13.3878					0.00548863	0.00210106	0.000747912	0.0027792		4.89773e-06	7.05048e-06	8.88788e-06	6.94536e-06		400.152
NM_001109972	49	575	1409	624	869.333		190	327	656	391				11.7347	28.7551	12.7347			3.87755	6.67347	13.3878					0.00548863	0.00210106	0.000747912	0.0027792		4.89773e-06	7.05048e-06	8.88788e-06	6.94536e-06		400.152
NM_173742	79	825	990	856	890.333		328	320	781	476.333				10.443	12.5316	10.8354			4.1519	4.05063	9.88608					0.00488449	0.000915654	0.000636368	0.0021455		5.24426e-06	4.27947e-06	6.56318e-06	5.3623e-06		400.109
NM_026532	108	444	569	379	464		112	168	552	277.333				4.11111	5.26852	3.50926			1.03704	1.55556	5.11111					0.00192288	0.000384957	0.0002061	0.000837978		1.30988e-06	1.64343e-06	3.39317e-06	2.11549e-06		396.114
NM_001166544	87	519	491	433	481		244	147	478	289.667				5.96552	5.64368	4.97701			2.8046	1.68966	5.49425					0.00279023	0.000412369	0.000292301	0.00116497		3.54248e-06	1.78511e-06	3.64753e-06	2.99171e-06		389.399
NM_001166543	87	519	491	433	481		244	147	478	289.667				5.96552	5.64368	4.97701			2.8046	1.68966	5.49425					0.00279023	0.000412369	0.000292301	0.00116497		3.54248e-06	1.78511e-06	3.64753e-06	2.99171e-06		389.399
NM_001081032	349	2883	1908	2111	2300.67		1508	876	2017	1467				8.26074	5.46705	6.04871			4.32092	2.51003	5.77937					0.00386377	0.000399463	0.000355242	0.00153949		5.45774e-06	2.65183e-06	3.83681e-06	3.98213e-06		386.6
NM_008199	338	1695	1320	1955	1656.67		810	652	1492	984.667				5.01479	3.90533	5.78402			2.39645	1.92899	4.4142					0.00234555	0.000285352	0.000339697	0.000990201		3.02695e-06	2.03797e-06	2.9305e-06	2.66514e-06		371.538
NM_001099674	78	292	493	255	346.667		80	176	331	195.667				3.74359	6.32051	3.26923			1.02564	2.25641	4.24359					0.00175098	0.000461823	0.000192003	0.000801601		1.29549e-06	2.38388e-06	2.81724e-06	2.16554e-06		370.163
NM_018798	619	636	959	714	769.667		300	271	668	413				1.02746	1.54927	1.15347			0.484653	0.437803	1.07916					0.000480572	0.000113201	6.77438e-05	0.000220506		6.12164e-07	4.62536e-07	7.16434e-07	5.97045e-07		369.329
NM_175102	67	251	297	231	259.667		119	68	294	160.333				3.74627	4.43284	3.44776			1.77612	1.01493	4.38806					0.00175223	0.000323896	0.000202488	0.000759538		2.24341e-06	1.07226e-06	2.91315e-06	2.07628e-06		365.818
NM_001199902	111	254	213	177	214.667		141	85	195	140.333				2.28829	1.91892	1.59459			1.27027	0.765766	1.75676					0.00107029	0.00014021	9.36509e-05	0.000434718		1.60448e-06	8.09027e-07	1.16628e-06	1.19326e-06		364.311
NM_175661	111	4738	10224	10914	8625.33		2411	2403	6810	3874.67				42.6847	92.1081	98.3243			21.7207	21.6486	61.3514					0.0199648	0.0067301	0.00577461	0.0108232		2.74354e-05	2.28717e-05	4.073e-05	3.03457e-05		356.662
NM_178199	107	8107	21866	17693	15888.7		1849	5733	14689	7423.67				75.7664	204.355	165.355			17.2804	53.5794	137.28					0.035438	0.0149317	0.00971135	0.020027		2.18268e-05	5.66064e-05	9.11378e-05	5.65237e-05		354.312
NM_025593	48	191	234	215	213.333		105	78	186	123				3.97917	4.875	4.47917			2.1875	1.625	3.875					0.00186116	0.000356203	0.000263063	0.00082681		2.76303e-06	1.7168e-06	2.57254e-06	2.35079e-06		351.716
NM_009609	356	55720	87785	63275	68926.7		17307	26642	80819	41589.3				156.517	246.587	177.739			48.6152	74.8371	227.02					0.0732071	0.0180175	0.0104386	0.0338877		6.14057e-05	7.90649e-05	0.000150714	9.70616e-05		349.137
NM_010398	338	5963	2908	3460	4110.33		3132	1987	4729	3282.67				17.642	8.60355	10.2367			9.26627	5.8787	13.9911					0.00825164	0.000628639	0.000601203	0.00316049		1.17042e-05	6.21081e-06	9.28844e-06	9.06782e-06		348.54
NM_015786	193	2330	5422	4795	4182.33		984	1587	3253	1941.33				12.0725	28.0933	24.8446			5.09845	8.2228	16.8549					0.00564665	0.0020527	0.00145913	0.00305283		6.43984e-06	8.68734e-06	1.11897e-05	8.77228e-06		348.008
NM_008452	335	186	333	154	224.333		75	150	141	122				0.555224	0.99403	0.459701			0.223881	0.447761	0.420896					0.000259693	7.26311e-05	2.69984e-05	0.000119774		2.82783e-07	4.73057e-07	2.79425e-07	3.45088e-07		347.083
NM_009092	116	2371	3260	2444	2691.67		1384	827	2579	1596.67				20.4397	28.1034	21.069			11.931	7.12931	22.2328					0.00956018	0.00205345	0.00123739	0.00428367		1.50701e-05	7.53207e-06	1.47599e-05	1.2454e-05		343.959
NM_027244	124	315	507	419	413.667		145	111	486	247.333				2.54032	4.08871	3.37903			1.16935	0.895161	3.91935					0.00118818	0.000298751	0.000198451	0.000561793		1.47701e-06	9.45732e-07	2.60199e-06	1.67491e-06		335.417
NM_023402	153	1663	3245	2325	2411		765	732	2610	1369				10.8693	21.2092	15.1961			5	4.78431	17.0588					0.00508385	0.0015497	0.00089247	0.00250867		6.31549e-06	5.0546e-06	1.1325e-05	7.56504e-06		331.614
NM_026851	102	249	252	193	231.333		276	36	82	131.333				2.44118	2.47059	1.89216			2.70588	0.352941	0.803922					0.0011418	0.000180519	0.000111127	0.000477817		3.4178e-06	3.7288e-07	5.33708e-07	1.44146e-06		331.481
NM_011343	81	737	1642	895	1091.33		268	506	1051	608.333				9.09877	20.2716	11.0494			3.30864	6.24691	12.9753					0.00425574	0.00148119	0.000648933	0.00212862		4.17914e-06	6.59983e-06	8.61406e-06	6.46434e-06		329.287
NM_001166545	92	648	661	761	690		458	218	595	423.667				7.04348	7.18478	8.27174			4.97826	2.36957	6.46739					0.00329442	0.000524973	0.000485801	0.00143507		6.28803e-06	2.50343e-06	4.29358e-06	4.36168e-06		329.017
NM_001170979	142	115	578	503	398.667		248	23	68	113				0.809859	4.07042	3.54225			1.74648	0.161972	0.478873					0.000378793	0.000297415	0.000208037	0.000294748		2.20597e-06	1.71122e-07	3.17915e-07	8.98337e-07		328.104
NM_019989	95	2443	2967	2412	2607.33		1098	1438	2588	1708				25.7158	31.2316	25.3895			11.5579	15.1368	27.2421					0.012028	0.00228201	0.00149113	0.00526703		1.45988e-05	1.5992e-05	1.80855e-05	1.62254e-05		324.616
NM_026095	107	532	784	593	636.333		452	156	489	365.667				4.97196	7.3271	5.54206			4.2243	1.45794	4.57009					0.00232552	0.000535372	0.000325486	0.00106213		5.33571e-06	1.54031e-06	3.034e-06	3.30334e-06		321.531
NM_025589	87	985	1339	875	1066.33		725	370	894	663				11.3218	15.3908	10.0575			8.33333	4.25287	10.2759					0.00529553	0.00112457	0.000590678	0.00233692		1.05258e-05	4.49313e-06	6.82195e-06	7.2803e-06		320.993
NM_023731	407	367	401	307	358.333		135	133	566	278				0.90172	0.985258	0.7543			0.331695	0.326781	1.39066					0.000421759	7.19902e-05	4.43002e-05	0.00017935		4.18964e-07	3.45242e-07	9.23235e-07	5.6248e-07		318.855
NM_178218	111	1850	4925	4790	3855		904	1282	3364	1850				16.6667	44.3694	43.1532			8.14414	11.5495	30.3063					0.00779545	0.00324195	0.0025344	0.00452393		1.02869e-05	1.2202e-05	2.01198e-05	1.42029e-05		318.522
NM_026467	65	402	543	254	399.667		226	405	73	234.667				6.18462	8.35385	3.90769			3.47692	6.23077	1.12308					0.00289271	0.000610394	0.0002295	0.0012442		4.3917e-06	6.58277e-06	7.45589e-07	3.90668e-06		318.48
NM_015787	200	2945	4858	3899	3900.67		1245	1833	3992	2356.67				14.725	24.29	19.495			6.225	9.165	19.96					0.00688728	0.00177481	0.00114495	0.00326901		7.86279e-06	9.68277e-06	1.32511e-05	1.02655e-05		318.445
NM_178200	107	6230	18124	13947	12767		1358	6427	11532	6439				58.2243	169.383	130.346			12.6916	60.0654	107.776					0.0272331	0.0123764	0.00765524	0.0157549		1.60307e-05	6.34588e-05	7.15502e-05	5.03466e-05		312.929
NM_001159351	84	331	199	204	244.667		86	195	405	228.667				3.94048	2.36905	2.42857			1.02381	2.32143	4.82143					0.00184307	0.0001731	0.000142631	0.000719599		1.29317e-06	2.45258e-06	3.20085e-06	2.31553e-06		310.77
NM_178205	117	6056	18161	19027	14414.7		1507	6574	12782	6954.33				51.7607	155.222	162.624			12.8803	56.188	109.248					0.0242099	0.0113417	0.00955094	0.0150342		1.62691e-05	5.93623e-05	7.25276e-05	4.93863e-05		304.419
NM_009082	141	1477	2027	1428	1644		524	454	2851	1276.33				10.4752	14.3759	10.1277			3.71631	3.21986	20.2199					0.00489952	0.00105041	0.0005948	0.00218158		4.69407e-06	3.40176e-06	1.34236e-05	7.17314e-06		304.131
NM_024187	220	651	580	446	559		508	248	492	416				2.95909	2.63636	2.02727			2.30909	1.12727	2.23636					0.00138405	0.000192632	0.000119062	0.000565247		2.91661e-06	1.19096e-06	1.48468e-06	1.86408e-06		303.231
NM_001037926	614	258	141	119	172.667		71	106	387	188				0.420195	0.229642	0.193811			0.115635	0.172638	0.630293					0.000196537	1.67793e-05	1.13826e-05	7.48995e-05		1.46059e-07	1.82391e-07	4.1844e-07	2.48963e-07		300.846
NM_078479	68	173	277	204	218		104	64	271	146.333				2.54412	4.07353	3			1.52941	0.941176	3.98529					0.00118995	0.000297642	0.000176191	0.000554595		1.9318e-06	9.94347e-07	2.64576e-06	1.8573e-06		298.602
NM_008197	175	154	232	73	153		107	94	120	107				0.88	1.32571	0.417143			0.611429	0.537143	0.685714					0.0004116	9.68665e-05	2.44989e-05	0.000177655		7.72294e-07	5.67488e-07	4.55233e-07	5.98338e-07		296.914
NM_175662	110	3406	8229	7242	6292.33		1863	2400	6210	3491				30.9636	74.8091	65.8364			16.9364	21.8182	56.4545					0.0144825	0.0054661	0.00386659	0.0079384		2.13923e-05	2.30508e-05	3.74791e-05	2.73074e-05		290.705
NM_007494	393	701	484	222	469		467	300	593	453.333				1.78372	1.23155	0.564885			1.1883	0.763359	1.50891					0.000834291	8.99863e-05	3.31759e-05	0.000319151		1.50093e-06	8.06484e-07	1.00173e-06	1.10305e-06		289.335
NM_011331	85	235	331	52	206		125	224	120	156.333				2.76471	3.89412	0.611765			1.47059	2.63529	1.41176					0.00129313	0.000284533	3.59291e-05	0.000537863		1.8575e-06	2.78417e-06	9.37244e-07	1.85964e-06		289.23
NM_145713	202	2556	5450	5023	4343		1058	1888	4919	2621.67				12.6535	26.9802	24.8663			5.23762	9.34653	24.3515					0.00591837	0.00197137	0.00146041	0.00311671		6.61563e-06	9.87456e-06	1.61665e-05	1.08856e-05		286.316
NM_183358	203	240	207	206	217.667		147	79	338	188				1.18227	1.0197	1.01478			0.724138	0.389163	1.66502					0.000552978	7.45071e-05	5.95982e-05	0.000229028		9.14657e-07	4.11148e-07	1.10538e-06	8.10395e-07		282.613
NM_025369	83	210	233	147	196.667		216	55	166	145.667				2.53012	2.80723	1.77108			2.60241	0.662651	2					0.00118341	0.000205117	0.000104016	0.000497513		3.2871e-06	7.00086e-07	1.32776e-06	1.77165e-06		280.819
NM_178202	119	7728	21628	18381	15912.3		1442	8221	18102	9255				64.9412	181.748	154.462			12.1176	69.084	152.118					0.0303747	0.0132798	0.0090716	0.0175754		1.53058e-05	7.29869e-05	0.000100988	6.30936e-05		278.561
NM_019568	80	433	1012	485	643.333		189	352	738	426.333				5.4125	12.65	6.0625			2.3625	4.4	9.225					0.00253157	0.000924302	0.000356052	0.00127064		2.98407e-06	4.64857e-06	6.1243e-06	4.58565e-06		277.091
NM_001163573	145	126	159	95	126.667		76	55	182	104.333				0.868966	1.09655	0.655172			0.524138	0.37931	1.25517					0.000406439	8.01221e-05	3.84784e-05	0.000175013		6.62038e-07	4.00739e-07	8.33285e-07	6.32021e-07		276.91
NM_013765	96	1953	1964	1688	1868.33		705	1164	3189	1686				20.3438	20.4583	17.5833			7.34375	12.125	33.2188					0.00951532	0.00149484	0.00103267	0.00401428		9.27588e-06	1.281e-05	2.20533e-05	1.47131e-05		272.838
NM_001190264	81	195	225	139	186.333		215	50	154	139.667				2.40741	2.77778	1.71605			2.65432	0.617284	1.90123					0.00112601	0.000202965	0.000100784	0.000476586		3.35267e-06	6.52157e-07	1.26219e-06	1.75567e-06		271.455
NM_175664	107	6229	19663	16190	14027.3		1291	7412	15295	7999.33				58.215	183.766	151.308			12.0654	69.271	142.944					0.0272287	0.0134273	0.00888638	0.0165141		1.52398e-05	7.31844e-05	9.48978e-05	6.11073e-05		270.248
NM_178212_dup1	111	4820	10302	9477	8199.67		3844	3117	7625	4862				43.4234	92.8108	85.3784			34.6306	28.0811	68.6937					0.0203103	0.00678144	0.00501429	0.010702		4.37419e-05	2.96675e-05	4.56044e-05	3.96713e-05		269.767
NM_013549	111	4820	10302	9477	8199.67		3844	3117	7625	4862				43.4234	92.8108	85.3784			34.6306	28.0811	68.6937					0.0203103	0.00678144	0.00501429	0.010702		4.37419e-05	2.96675e-05	4.56044e-05	3.96713e-05		269.767
NM_013549_dup1	111	4820	10302	9477	8199.67		3850	3117	7625	4864				43.4234	92.8108	85.3784			34.6847	28.0811	68.6937					0.0203103	0.00678144	0.00501429	0.010702		4.38102e-05	2.96675e-05	4.56044e-05	3.9694e-05		269.613
NM_178212	111	4820	10302	9477	8199.67		3850	3117	7625	4864				43.4234	92.8108	85.3784			34.6847	28.0811	68.6937					0.0203103	0.00678144	0.00501429	0.010702		4.38102e-05	2.96675e-05	4.56044e-05	3.9694e-05		269.613
NM_025381	100	580	717	579	625.333		405	251	839	498.333				5.8	7.17	5.79			4.05	2.51	8.39					0.00271282	0.000523893	0.000340048	0.00119225		5.11555e-06	2.6518e-06	5.56996e-06	4.44577e-06		268.177
NM_175652	84	301	376	316	331		78	304	419	267				3.58333	4.47619	3.7619			0.928571	3.61905	4.9881					0.00167602	0.000327063	0.000220938	0.000741341		1.17288e-06	3.8235e-06	3.3115e-06	2.76929e-06		267.7
NM_026902	162	414	485	358	419		109	371	612	364				2.55556	2.99383	2.20988			0.67284	2.29012	3.77778					0.0011953	0.000218751	0.000129787	0.000514613		8.49862e-07	2.4195e-06	2.50799e-06	1.92579e-06		267.222
NM_001024731	505	132	114	101	115.667		44	89	205	112.667				0.261386	0.225743	0.2			0.0871287	0.176238	0.405941					0.000122257	1.64944e-05	1.17461e-05	5.01659e-05		1.10052e-07	1.86194e-07	2.69496e-07	1.88581e-07		266.018
NM_009333	440	123	220	121	154.667		109	53	166	109.333				0.279545	0.5	0.275			0.247727	0.120455	0.377273					0.000130751	3.65337e-05	1.61508e-05	6.11451e-05		3.12904e-07	1.27259e-07	2.50464e-07	2.30209e-07		265.607
NM_001142918	440	123	218	119	153.333		109	53	166	109.333				0.279545	0.495455	0.270455			0.247727	0.120455	0.377273					0.000130751	3.62016e-05	1.58839e-05	6.09454e-05		3.12904e-07	1.27259e-07	2.50464e-07	2.30209e-07		264.739
NM_019467	128	1083	461	257	600.333		836	267	1154	752.333				8.46094	3.60156	2.00781			6.53125	2.08594	9.01562					0.00395741	0.000263157	0.000117919	0.00144616		8.24961e-06	2.20378e-06	5.9853e-06	5.47956e-06		263.919
NM_001142920	416	115	203	106	141.333		99	50	164	104.333				0.276442	0.487981	0.254808			0.237981	0.120192	0.394231					0.000129299	3.56555e-05	1.49649e-05	5.99733e-05		3.00593e-07	1.26982e-07	2.61722e-07	2.29766e-07		261.019
NM_178201	107	7684	21016	18816	15838.7		2016	8423	18831	9756.67				71.8131	196.411	175.85			18.8411	78.7196	175.991					0.0335889	0.0143513	0.0103277	0.0194226		2.37982e-05	8.31668e-05	0.000116837	7.46006e-05		260.355
NM_001142919	423	118	213	117	149.333		107	51	166	108				0.27896	0.503546	0.276596			0.252955	0.120567	0.392435					0.000130477	3.67928e-05	1.62445e-05	6.11714e-05		3.19507e-07	1.27379e-07	2.6053e-07	2.35805e-07		259.415
NM_198090	360	2308	3957	2666	2977		2524	1258	2102	1961.33				6.41111	10.9917	7.40556			7.01111	3.49444	5.83889					0.00299865	0.000803132	0.00043493	0.00141224		8.85572e-06	3.69186e-06	3.87633e-06	5.47464e-06		257.96
NM_001025427	88	674	681	784	713		565	288	884	579				7.65909	7.73864	8.90909			6.42045	3.27273	10.0455					0.00358236	0.000565442	0.000523233	0.00155701		8.10967e-06	3.45762e-06	6.66899e-06	6.07876e-06		256.14
NM_016660	88	674	681	784	713		565	288	884	579				7.65909	7.73864	8.90909			6.42045	3.27273	10.0455					0.00358236	0.000565442	0.000523233	0.00155701		8.10967e-06	3.45762e-06	6.66899e-06	6.07876e-06		256.14
NM_001166476	88	674	681	784	713		565	288	884	579				7.65909	7.73864	8.90909			6.42045	3.27273	10.0455					0.00358236	0.000565442	0.000523233	0.00155701		8.10967e-06	3.45762e-06	6.66899e-06	6.07876e-06		256.14
NM_001166535	88	674	681	784	713		565	288	884	579				7.65909	7.73864	8.90909			6.42045	3.27273	10.0455					0.00358236	0.000565442	0.000523233	0.00155701		8.10967e-06	3.45762e-06	6.66899e-06	6.07876e-06		256.14
NM_001166536	88	674	681	784	713		565	288	884	579				7.65909	7.73864	8.90909			6.42045	3.27273	10.0455					0.00358236	0.000565442	0.000523233	0.00155701		8.10967e-06	3.45762e-06	6.66899e-06	6.07876e-06		256.14
NM_001039356	88	674	681	784	713		565	288	884	579				7.65909	7.73864	8.90909			6.42045	3.27273	10.0455					0.00358236	0.000565442	0.000523233	0.00155701		8.10967e-06	3.45762e-06	6.66899e-06	6.07876e-06		256.14
NM_030694	125	1530	2248	2154	1977.33		680	1090	2925	1565				12.24	17.984	17.232			5.44	8.72	23.4					0.00572498	0.00131404	0.00101204	0.00268369		6.87125e-06	9.21263e-06	1.55348e-05	1.05396e-05		254.63
NM_026308	131	125	134	144	134.333		91	45	210	115.333				0.954198	1.0229	1.09924			0.694656	0.343511	1.60305					0.000446304	7.47407e-05	6.45584e-05	0.000195201		8.77419e-07	3.62918e-07	1.06424e-06	7.68191e-07		254.105
NM_011508	94	2824	3498	3222	3181.33		1163	2591	4133	2629				30.0426	37.2128	34.2766			12.3723	27.5638	43.9681					0.0140517	0.00271904	0.00201307	0.00626127		1.56275e-05	2.9121e-05	2.91896e-05	2.4646e-05		254.048
NM_145073	117	5573	17007	18505	13695		1900	7125	14317	7780.67				47.6325	145.359	158.162			16.2393	60.8974	122.368					0.022279	0.010621	0.00928892	0.014063		2.05119e-05	6.43378e-05	8.12375e-05	5.53624e-05		254.017
NM_001142923	423	118	216	120	151.333		109	57	166	110.667				0.27896	0.510638	0.283688			0.257683	0.134752	0.392435					0.000130477	3.7311e-05	1.66611e-05	6.1483e-05		3.25479e-07	1.42364e-07	2.6053e-07	2.42791e-07		253.234
NM_028047	501	247	241	201	229.667		172	123	341	212				0.493014	0.481038	0.401198			0.343313	0.245509	0.680639					0.000230596	3.51482e-05	2.35624e-05	9.64355e-05		4.33639e-07	2.59379e-07	4.51863e-07	3.81627e-07		252.696
NM_023202	94	394	587	587	522.667		204	159	932	431.667				4.19149	6.24468	6.24468			2.17021	1.69149	9.91489					0.00196047	0.000456282	0.000366752	0.000927835		2.74119e-06	1.78705e-06	6.58231e-06	3.70352e-06		250.528
NM_015740	106	280	350	285	305		146	127	564	279				2.64151	3.30189	2.68868			1.37736	1.19811	5.32075					0.0012355	0.00024126	0.000157907	0.000544891		1.73974e-06	1.2658e-06	3.53235e-06	2.1793e-06		250.031
NM_023247	166	138	159	139	145.333		97	79	198	124.667				0.831325	0.957831	0.837349			0.584337	0.475904	1.19277					0.000388833	6.99862e-05	4.91777e-05	0.000169332		7.38076e-07	5.02789e-07	7.91858e-07	6.77574e-07		249.91
NM_016844	50	884	1129	995	1002.67		519	571	1465	851.667				17.68	22.58	19.9			10.38	11.42	29.3					0.00826941	0.00164986	0.00116873	0.003696		1.3111e-05	1.20652e-05	1.94517e-05	1.48759e-05		248.455
NM_001097979_dup1	115	8367	22822	19295	16828		2233	9332	21714	11093				72.7565	198.452	167.783			19.4174	81.1478	188.817					0.0340302	0.0145004	0.00985391	0.0194615		2.45261e-05	8.57322e-05	0.000125352	7.85368e-05		247.801
NM_001110555	115	8367	22822	19295	16828		2233	9332	21714	11093				72.7565	198.452	167.783			19.4174	81.1478	188.817					0.0340302	0.0145004	0.00985391	0.0194615		2.45261e-05	8.57322e-05	0.000125352	7.85368e-05		247.801
NM_001110555_dup1	115	8367	22822	19295	16828		2233	9332	21714	11093				72.7565	198.452	167.783			19.4174	81.1478	188.817					0.0340302	0.0145004	0.00985391	0.0194615		2.45261e-05	8.57322e-05	0.000125352	7.85368e-05		247.801
NM_001097979	115	8367	22822	19295	16828		2233	9332	21714	11093				72.7565	198.452	167.783			19.4174	81.1478	188.817					0.0340302	0.0145004	0.00985391	0.0194615		2.45261e-05	8.57322e-05	0.000125352	7.85368e-05		247.801
NM_019883	109	2004	3106	2690	2600		1395	1131	3589	2038.33				18.3853	28.4954	24.6789			12.7982	10.3761	32.9266					0.00859931	0.00208208	0.0014494	0.0040436		1.61653e-05	1.09623e-05	2.18593e-05	1.6329e-05		247.633
NM_001142922	579	137	248	136	173.667		126	68	203	132.333				0.236615	0.428325	0.234888			0.217617	0.117444	0.350604					0.000110671	3.12966e-05	1.3795e-05	5.19209e-05		2.74871e-07	1.24079e-07	2.3276e-07	2.1057e-07		246.573
NM_001142921	428	115	213	120	149.333		111	57	166	111.333				0.268692	0.497664	0.280374			0.259346	0.133178	0.38785					0.000125674	3.6363e-05	1.64664e-05	5.95012e-05		3.27579e-07	1.40701e-07	2.57487e-07	2.41922e-07		245.952
NM_024460	18	102	258	182	180.667		78	69	220	122.333				5.66667	14.3333	10.1111			4.33333	3.83333	12.2222					0.00265045	0.0010473	0.000593828	0.00143053		5.47343e-06	4.04989e-06	8.1141e-06	5.87914e-06		243.322
NM_001134692	18	102	258	182	180.667		78	69	220	122.333				5.66667	14.3333	10.1111			4.33333	3.83333	12.2222					0.00265045	0.0010473	0.000593828	0.00143053		5.47343e-06	4.04989e-06	8.1141e-06	5.87914e-06		243.322
NM_013548	117	6125	18366	19677	14722.7		2414	8050	15914	8792.67				52.3504	156.974	168.179			20.6325	68.8034	136.017					0.0244857	0.0114697	0.00987722	0.0152775		2.60608e-05	7.26904e-05	9.02992e-05	6.30168e-05		242.436
NM_001111073	159	6124	6355	6085	6188		4208	2820	10444	5824				38.5157	39.9686	38.2704			26.4654	17.7358	65.6855					0.0180148	0.0029204	0.00224763	0.00772762		3.34284e-05	1.87378e-05	4.36074e-05	3.19245e-05		242.059
NM_008761	159	6124	6355	6085	6188		4208	2820	10444	5824				38.5157	39.9686	38.2704			26.4654	17.7358	65.6855					0.0180148	0.0029204	0.00224763	0.00772762		3.34284e-05	1.87378e-05	4.36074e-05	3.19245e-05		242.059
NM_001046637	268	409	627	443	493		308	307	588	401				1.52612	2.33955	1.65299			1.14925	1.14552	2.19403					0.000713807	0.000170945	9.70802e-05	0.000327277		1.45162e-06	1.21024e-06	1.45657e-06	1.37281e-06		238.399
NM_015782	268	409	627	443	493		308	307	588	401				1.52612	2.33955	1.65299			1.14925	1.14552	2.19403					0.000713807	0.000170945	9.70802e-05	0.000327277		1.45162e-06	1.21024e-06	1.45657e-06	1.37281e-06		238.399
NM_133706	157	261	286	176	241		196	177	321	231.333				1.66242	1.82166	1.12102			1.24841	1.12739	2.04459					0.000777559	0.000133104	6.58377e-05	0.0003255		1.57686e-06	1.19108e-06	1.35736e-06	1.3751e-06		236.71
NM_175665	107	8443	23009	19572	17008		2253	9849	23225	11775.7				78.9065	215.037	182.916			21.0561	92.0467	217.056					0.0369067	0.0157122	0.0107427	0.0211205		2.65959e-05	9.72468e-05	0.000144099	8.9314e-05		236.475
NM_001111099	140	1647	1673	1858	1726		950	1300	2552	1600.67				11.7643	11.95	13.2714			6.78571	9.28571	18.2286					0.00550247	0.000873155	0.000779434	0.00238502		8.57102e-06	9.8103e-06	1.21016e-05	1.0161e-05		234.724
NM_007669	140	1647	1673	1858	1726		950	1300	2552	1600.67				11.7643	11.95	13.2714			6.78571	9.28571	18.2286					0.00550247	0.000873155	0.000779434	0.00238502		8.57102e-06	9.8103e-06	1.21016e-05	1.0161e-05		234.724
NM_001166546	99	615	604	765	661.333		667	256	742	555				6.21212	6.10101	7.72727			6.73737	2.58586	7.49495					0.00290558	0.000445785	0.000453825	0.0012684		8.50997e-06	2.73194e-06	4.97575e-06	5.40589e-06		234.632
NM_013819	317	766	657	669	697.333		677	425	897	666.333				2.4164	2.07256	2.11041			2.13565	1.34069	2.82965					0.00113022	0.000151436	0.000123945	0.000468533		2.69753e-06	1.41644e-06	1.87855e-06	1.99751e-06		234.559
NM_021519	129	358	514	346	406		231	245	619	365				2.77519	3.9845	2.68217			1.7907	1.89922	4.79845					0.00129803	0.000291137	0.000157525	0.000582231		2.26183e-06	2.00652e-06	3.1856e-06	2.48465e-06		234.331
NM_053162	73	112	136	127	125		47	55	274	125.333				1.53425	1.86301	1.73973			0.643836	0.753425	3.75342					0.000717608	0.000136126	0.000102175	0.000318636		8.13228e-07	7.95989e-07	2.49183e-06	1.36701e-06		233.089
NM_178215	117	3488	10828	10641	8319		1499	4144	10276	5306.33				29.812	92.547	90.9487			12.812	35.4188	87.8291					0.0139439	0.00676217	0.00534144	0.00868249		1.61828e-05	3.74197e-05	5.8308e-05	3.73035e-05		232.752
NM_031248	106	175	378	324	292.333		100	120	454	224.667				1.65094	3.56604	3.0566			0.943396	1.13208	4.28302					0.000772191	0.000260561	0.000179515	0.000404089		1.1916e-06	1.19603e-06	2.84341e-06	1.74368e-06		231.745
NM_001024932	206	217	161	71	149.667		203	116	203	174				1.0534	0.781553	0.34466			0.985437	0.563107	0.985437					0.000492703	5.7106e-05	2.0242e-05	0.000190017		1.2447e-06	5.94919e-07	6.54213e-07	8.31278e-07		228.584
NM_026732	126	108	149	125	127.333		48	54	276	126				0.857143	1.18254	0.992063			0.380952	0.428571	2.19048					0.000400909	8.64051e-05	5.82641e-05	0.000181859		4.8118e-07	4.52783e-07	1.45422e-06	7.9606e-07		228.449
NM_010390	349	3171	2129	2696	2665.33		2215	2160	4204	2859.67				9.08596	6.10029	7.72493			6.3467	6.18911	12.0458					0.00424975	0.000445732	0.000453687	0.00171639		8.01651e-06	6.53876e-06	7.99701e-06	7.51743e-06		228.321
NM_001166477	77	678	671	774	707.667		620	328	1018	655.333				8.80519	8.71429	10.0519			8.05195	4.25974	13.2208					0.00411843	0.00063673	0.000590353	0.00178184		1.01704e-05	4.50039e-06	8.77702e-06	7.81594e-06		227.975
NM_001166542	77	678	671	774	707.667		620	328	1018	655.333				8.80519	8.71429	10.0519			8.05195	4.25974	13.2208					0.00411843	0.00063673	0.000590353	0.00178184		1.01704e-05	4.50039e-06	8.77702e-06	7.81594e-06		227.975
NM_001166541	77	678	671	774	707.667		620	328	1018	655.333				8.80519	8.71429	10.0519			8.05195	4.25974	13.2208					0.00411843	0.00063673	0.000590353	0.00178184		1.01704e-05	4.50039e-06	8.77702e-06	7.81594e-06		227.975
NM_001166540	77	678	671	774	707.667		620	328	1018	655.333				8.80519	8.71429	10.0519			8.05195	4.25974	13.2208					0.00411843	0.00063673	0.000590353	0.00178184		1.01704e-05	4.50039e-06	8.77702e-06	7.81594e-06		227.975
NM_001166537	77	678	671	774	707.667		620	328	1018	655.333				8.80519	8.71429	10.0519			8.05195	4.25974	13.2208					0.00411843	0.00063673	0.000590353	0.00178184		1.01704e-05	4.50039e-06	8.77702e-06	7.81594e-06		227.975
NM_001166539	77	678	671	774	707.667		620	328	1018	655.333				8.80519	8.71429	10.0519			8.05195	4.25974	13.2208					0.00411843	0.00063673	0.000590353	0.00178184		1.01704e-05	4.50039e-06	8.77702e-06	7.81594e-06		227.975
NM_019712	89	707	761	702	723.333		370	526	1286	727.333				7.94382	8.55056	7.88764			4.1573	5.91011	14.4494					0.00371554	0.000624767	0.000463243	0.00160118		5.25108e-06	6.244e-06	9.59271e-06	7.02926e-06		227.788
NM_009720	49	475	826	883	728		695	140	675	503.333				9.69388	16.8571	18.0204			14.1837	2.85714	13.7755					0.00453409	0.00123171	0.00105834	0.00227471		1.79154e-05	3.01855e-06	9.1453e-06	1.00264e-05		226.872
NM_178600	142	250	222	247	239.667		176	199	330	235				1.76056	1.56338	1.73944			1.23944	1.40141	2.32394					0.000823463	0.000114232	0.000102158	0.000346617		1.56553e-06	1.48058e-06	1.54282e-06	1.52964e-06		226.6
NM_013469	484	732	1362	1139	1077.67		530	844	1040	804.667				1.5124	2.81405	2.35331			1.09504	1.7438	2.14876					0.000707389	0.000205615	0.00013821	0.000350405		1.38314e-06	1.84232e-06	1.42652e-06	1.55066e-06		225.971
NM_001170485	72	1938	2562	1879	2126.33		913	1557	3829	2099.67				26.9167	35.5833	26.0972			12.6806	21.625	53.1806					0.0125896	0.00259998	0.0015327	0.00557411		1.60168e-05	2.28467e-05	3.53056e-05	2.4723e-05		225.462
NM_007899	540	605	548	431	528		602	356	623	527				1.12037	1.01481	0.798148			1.11481	0.659259	1.1537					0.000524027	7.41498e-05	4.68754e-05	0.000215018		1.40812e-06	6.96503e-07	7.65922e-07	9.56849e-07		224.714
NM_172603	274	178	185	119	160.667		141	142	204	162.333				0.649635	0.675182	0.434307			0.514599	0.518248	0.744526					0.000303852	4.93338e-05	2.55069e-05	0.000126231		6.49989e-07	5.47526e-07	4.94276e-07	5.6393e-07		223.841
NM_178216	117	3488	10828	10641	8319		1800	4240	10466	5502				29.812	92.547	90.9487			15.3846	36.2393	89.453					0.0139439	0.00676217	0.00534144	0.00868249		1.94323e-05	3.82866e-05	5.93861e-05	3.9035e-05		222.428
NM_054045	117	3488	10828	10641	8319		1804	4240	10466	5503.33				29.812	92.547	90.9487			15.4188	36.2393	89.453					0.0139439	0.00676217	0.00534144	0.00868249		1.94755e-05	3.82866e-05	5.93861e-05	3.90494e-05		222.346
NM_178203	117	6140	17782	19997	14639.7		2231	8662	18250	9714.33				52.4786	151.983	170.915			19.0684	74.0342	155.983					0.0245457	0.011105	0.0100379	0.0152295		2.40852e-05	7.82167e-05	0.000103554	6.86187e-05		221.944
NM_001039352	683	770	665	470	635		505	417	1343	755				1.12738	0.973646	0.688141			0.739385	0.610542	1.96633					0.000527306	7.11417e-05	4.04147e-05	0.000212954		9.33916e-07	6.45034e-07	1.30541e-06	9.61452e-07		221.492
NM_145360	264	773	700	563	678.667		581	556	1052	729.667				2.92803	2.65152	2.13258			2.20076	2.10606	3.98485					0.00136952	0.000193739	0.000125247	0.000562835		2.77977e-06	2.22504e-06	2.64547e-06	2.55009e-06		220.711
NM_001252653	539	581	546	428	518.333		583	365	613	520.333				1.07792	1.01299	0.794063			1.08163	0.67718	1.13729					0.000504173	7.40163e-05	4.66355e-05	0.000208275		1.36621e-06	7.15436e-07	7.55026e-07	9.45557e-07		220.267
NM_053086	682	764	664	472	633.333		501	418	1348	755.667				1.12023	0.973607	0.692082			0.734604	0.612903	1.97654					0.000523964	7.11389e-05	4.06462e-05	0.000211916		9.27877e-07	6.47529e-07	1.31219e-06	9.62531e-07		220.166
NM_001113556	141	158	211	59	142.667		94	178	176	149.333				1.12057	1.49645	0.41844			0.666667	1.26241	1.24823					0.000524119	0.000109342	2.45751e-05	0.000219345		8.42066e-07	1.33373e-06	8.28674e-07	1.00149e-06		219.019
NM_019406	319	858	842	555	751.667		603	651	1226	826.667				2.68966	2.6395	1.73981			1.89028	2.04075	3.84326					0.00125802	0.000192861	0.00010218	0.000517688		2.38761e-06	2.15604e-06	2.55147e-06	2.36504e-06		218.892
NM_020034	204	2318	4186	3903	3469		764	2075	6444	3094.33				11.3627	20.5196	19.1324			3.7451	10.1716	31.5882					0.00531466	0.00149931	0.00112365	0.00264587		4.73043e-06	1.07462e-05	2.09708e-05	1.21492e-05		217.783
NM_001252550	104	191	188	146	175		111	130	356	199				1.83654	1.80769	1.40385			1.06731	1.25	3.42308					0.000858998	0.000132083	8.24482e-05	0.000357843		1.34811e-06	1.32062e-06	2.27252e-06	1.64708e-06		217.259
NM_009226	100	528	703	514	581.667		358	401	968	575.667				5.28	7.03	5.14			3.58	4.01	9.68					0.0024696	0.000513664	0.000301873	0.00109504		4.52189e-06	4.23654e-06	6.42637e-06	5.0616e-06		216.344
NM_024236	222	309	418	287	338		238	297	413	316				1.39189	1.88288	1.29279			1.07207	1.33784	1.86036					0.000651025	0.000137577	7.5926e-05	0.000288176		1.35413e-06	1.41342e-06	1.23506e-06	1.3342e-06		215.991
NM_029803	71	1471	2225	1887	1861		1350	1199	2254	1601				20.7183	31.338	26.5775			19.0141	16.8873	31.7465					0.00969051	0.00228979	0.0015609	0.00451373		2.40167e-05	1.78414e-05	2.10759e-05	2.0978e-05		215.165
NM_026175	772	715	727	500	647.333		524	454	1201	726.333				0.926166	0.94171	0.647668			0.678756	0.588083	1.5557					0.000433193	6.88083e-05	3.80377e-05	0.000180013		8.57336e-07	6.21306e-07	1.0328e-06	8.37147e-07		215.031
NM_001199270	400	1353	2433	2478	2088		1279	1240	2294	1604.33				3.3825	6.0825	6.195			3.1975	3.1	5.735					0.00158209	0.000444432	0.000363834	0.000796784		4.03876e-06	3.27513e-06	3.80736e-06	3.70708e-06		214.936
NM_010187	274	930	1062	727	906.333		1038	727	769	844.667				3.39416	3.87591	2.65328			3.78832	2.65328	2.80657					0.00158754	0.000283203	0.000155828	0.000675524		4.78502e-06	2.80318e-06	1.86323e-06	3.15048e-06		214.42
NM_025987	112	232	317	229	259.333		119	170	523	270.667				2.07143	2.83036	2.04464			1.0625	1.51786	4.66964					0.000968863	0.000206807	0.000120082	0.000431917		1.34204e-06	1.60361e-06	3.10009e-06	2.01525e-06		214.325
NM_178825	210	244	232	135	203.667		345	95	170	203.333				1.1619	1.10476	0.642857			1.64286	0.452381	0.809524					0.000543454	8.0722e-05	3.77552e-05	0.000220644		2.07509e-06	4.77938e-07	5.37427e-07	1.03015e-06		214.186
NM_175653	117	5795	16794	17731	13440		2185	8504	17368	9352.33				49.5299	143.538	151.547			18.6752	72.6838	148.444					0.0231665	0.010488	0.00890039	0.0141849		2.35886e-05	7.67899e-05	9.85494e-05	6.63093e-05		213.921
NM_001039353	682	780	676	473	643		518	434	1446	799.333				1.1437	0.991202	0.693548			0.759531	0.636364	2.12023					0.000534937	7.24245e-05	4.07323e-05	0.000216031		9.59362e-07	6.72314e-07	1.40758e-06	1.01309e-06		213.241
NM_172648	385	853	1234	662	916.333		659	805	1206	890				2.21558	3.20519	1.71948			1.71169	2.09091	3.13247					0.00103629	0.000234195	0.000100986	0.000457156		2.16203e-06	2.20903e-06	2.07959e-06	2.15022e-06		212.609
NM_025921	180	99	136	86	107		25	113	207	115				0.55	0.755556	0.477778			0.138889	0.627778	1.15					0.00025725	5.52065e-05	2.806e-05	0.000113505		1.7543e-07	6.63243e-07	7.63463e-07	5.34046e-07		212.539
NM_009083	96	1748	2511	1437	1898.67		1167	1111	3707	1995				18.2083	26.1562	14.9688			12.1562	11.5729	38.6146					0.00851653	0.00191117	0.000879118	0.00376894		1.53545e-05	1.22267e-05	2.56355e-05	1.77389e-05		212.467
NM_001163485	96	1748	2511	1437	1898.67		1167	1111	3707	1995				18.2083	26.1562	14.9688			12.1562	11.5729	38.6146					0.00851653	0.00191117	0.000879118	0.00376894		1.53545e-05	1.22267e-05	2.56355e-05	1.77389e-05		212.467
NM_133732	296	179	283	173	211.667		118	244	200	187.333				0.60473	0.956081	0.584459			0.398649	0.824324	0.675676					0.000282848	6.98583e-05	3.43255e-05	0.000129011		5.03532e-07	8.70894e-07	4.48568e-07	6.07665e-07		212.306
NM_001199484	296	179	283	173	211.667		118	244	200	187.333				0.60473	0.956081	0.584459			0.398649	0.824324	0.675676					0.000282848	6.98583e-05	3.43255e-05	0.000129011		5.03532e-07	8.70894e-07	4.48568e-07	6.07665e-07		212.306
NM_001199485	296	179	283	173	211.667		118	244	200	187.333				0.60473	0.956081	0.584459			0.398649	0.824324	0.675676					0.000282848	6.98583e-05	3.43255e-05	0.000129011		5.03532e-07	8.70894e-07	4.48568e-07	6.07665e-07		212.306
NM_001039351	681	774	675	475	641.333		514	435	1451	800				1.13656	0.991189	0.697504			0.754772	0.638767	2.13069					0.000531601	7.24236e-05	4.09646e-05	0.000214997		9.53352e-07	6.74853e-07	1.41452e-06	1.01424e-06		211.977
NM_025963	146	2679	3158	2299	2712		3024	1237	3836	2699				18.3493	21.6301	15.7466			20.7123	8.4726	26.274					0.00858247	0.00158046	0.0009248	0.00369591		2.61617e-05	8.95125e-06	1.74428e-05	1.75186e-05		210.971
NM_144545	242	479	528	302	436.333		531	345	443	439.667				1.97934	2.18182	1.24793			2.19421	1.42562	1.83058					0.00092579	0.00015942	7.32915e-05	0.000386167		2.77151e-06	1.50616e-06	1.21529e-06	1.83098e-06		210.907
NM_001256055	242	479	528	302	436.333		531	345	443	439.667				1.97934	2.18182	1.24793			2.19421	1.42562	1.83058					0.00092579	0.00015942	7.32915e-05	0.000386167		2.77151e-06	1.50616e-06	1.21529e-06	1.83098e-06		210.907
NM_024239	405	235	248	221	234.667		188	220	301	236.333				0.580247	0.612346	0.545679			0.464198	0.54321	0.74321					0.000271397	4.47425e-05	3.20479e-05	0.000116062		5.86327e-07	5.73898e-07	4.93403e-07	5.51209e-07		210.56
NM_016957	71	439	758	576	591		337	341	930	536				6.1831	10.6761	8.11268			4.74648	4.80282	13.0986					0.002892	0.000780071	0.00047646	0.00138284		5.99527e-06	5.07415e-06	8.69591e-06	6.58844e-06		209.889
NM_013550	117	5212	16673	17916	13267		2148	8211	16694	9017.67				44.547	142.504	153.128			18.359	70.1795	142.684					0.0208358	0.0104124	0.00899326	0.0134138		2.31892e-05	7.41442e-05	9.4725e-05	6.40195e-05		209.527
NM_133209	205	221	175	82	159.333		178	167	266	203.667				1.07805	0.853659	0.4			0.868293	0.814634	1.29756					0.000504232	6.23746e-05	2.34921e-05	0.0001967		1.09674e-06	8.60656e-07	8.61426e-07	9.39607e-07		209.342
NM_178206	117	5900	18596	20195	14897		2756	8843	18863	10154				50.4274	158.94	172.607			23.5556	75.5812	161.222					0.0235862	0.0116133	0.0101372	0.0151123		2.9753e-05	7.98511e-05	0.000107032	7.22121e-05		209.276
NM_178207	117	5745	17812	19247	14268		2586	8760	18224	9856.67				49.1026	152.239	164.504			22.1026	74.8718	155.761					0.0229666	0.0111237	0.00966138	0.0145839		2.79177e-05	7.91016e-05	0.000103407	7.0142e-05		207.92
NM_178197	107	7411	19168	16961	14513.3		1943	9439	23776	11719.3				69.2617	179.14	158.514			18.1589	88.215	222.206					0.0323955	0.0130893	0.00930957	0.0182648		2.29364e-05	9.31986e-05	0.000147518	8.78844e-05		207.828
NM_178204	117	5177	16641	17955	13257.7		1744	8354	17567	9221.67				44.2479	142.231	153.462			14.906	71.4017	150.145					0.0206959	0.0103924	0.00901283	0.0133671		1.88277e-05	7.54355e-05	9.96786e-05	6.46473e-05		206.769
NM_027427	538	280	322	269	290.333		282	187	412	293.667				0.520446	0.598513	0.5			0.524164	0.347584	0.765799					0.000243427	4.37318e-05	2.93651e-05	0.000105508		6.6207e-07	3.6722e-07	5.084e-07	5.12563e-07		205.844
NM_025440	116	191	222	166	193		129	120	408	219				1.64655	1.91379	1.43103			1.11207	1.03448	3.51724					0.000770136	0.000139836	8.4045e-05	0.000331339		1.40465e-06	1.09292e-06	2.33503e-06	1.61087e-06		205.69
NM_013795	84	1009	1825	1502	1445.33		1229	655	1701	1195				12.0119	21.7262	17.881			14.631	7.79762	20.25					0.00561829	0.00158748	0.00105015	0.00275197		1.84803e-05	8.23814e-06	1.34436e-05	1.33874e-05		205.565
NM_011288	127	309	296	260	288.333		317	135	512	321.333				2.43307	2.33071	2.04724			2.49606	1.06299	4.0315					0.00113801	0.000170299	0.000120235	0.000476182		3.15277e-06	1.12304e-06	2.67643e-06	2.31742e-06		205.48
NM_172086	116	2845	2983	1270	2366		2845	1574	3993	2804				24.5259	25.7155	10.9483			24.5259	13.569	34.4224					0.0114714	0.00187897	0.000642995	0.00466445		3.09786e-05	1.43355e-05	2.28524e-05	2.27222e-05		205.282
NM_001039239	734	189	113	93	131.667		114	133	331	192.667				0.257493	0.153951	0.126703			0.155313	0.181199	0.450954					0.000120436	1.12488e-05	7.4413e-06	4.63755e-05		1.96176e-07	1.91436e-07	2.9938e-07	2.28997e-07		202.516
NM_001185182	108	231	255	174	220		250	131	335	238.667				2.13889	2.36111	1.61111			2.31481	1.21296	3.10185					0.00100042	0.00017252	9.4621e-05	0.000422519		2.92384e-06	1.28149e-06	2.05926e-06	2.0882e-06		202.337
NM_010385	108	231	255	174	220		250	131	335	238.667				2.13889	2.36111	1.61111			2.31481	1.21296	3.10185					0.00100042	0.00017252	9.4621e-05	0.000422519		2.92384e-06	1.28149e-06	2.05926e-06	2.0882e-06		202.337
NM_024281	1445	2014	3405	1786	2401.67		1992	2003	2682	2225.67				1.39377	2.3564	1.23599			1.37855	1.38616	1.85606					0.000651904	0.000172176	7.25898e-05	0.00029889		1.74124e-06	1.46447e-06	1.2322e-06	1.4793e-06		202.048
NM_025864	331	478	728	623	609.667		384	408	957	583				1.44411	2.1994	1.88218			1.16012	1.23263	2.89124					0.000675448	0.000160704	0.000110541	0.000315564		1.46535e-06	1.30226e-06	1.91944e-06	1.56235e-06		201.981
NM_010760	127	255	347	197	266.333		291	174	341	268.667				2.00787	2.73228	1.55118			2.29134	1.37008	2.68504					0.000939137	0.000199641	9.11013e-05	0.00040996		2.89419e-06	1.44748e-06	1.78255e-06	2.0414e-06		200.822
NM_001077189	321	858	1042	720	873.333		1032	732	784	849.333				2.6729	3.24611	2.24299			3.21495	2.28037	2.44237					0.00125019	0.000237184	0.000131731	0.000539701		4.0608e-06	2.4092e-06	1.62144e-06	2.69715e-06		200.1
NM_010828	250	512	406	656	524.667		688	179	739	535.333				2.048	1.624	2.624			2.752	0.716	2.956					0.000957905	0.000118661	0.000154108	0.000410225		3.47605e-06	7.5645e-07	1.96243e-06	2.06498e-06		198.658
NM_011722	171	312	367	285	321.333		231	194	694	373				1.82456	2.1462	1.66667			1.35088	1.1345	4.05848					0.000853396	0.000156817	9.78838e-05	0.000369366		1.70629e-06	1.1986e-06	2.69435e-06	1.86641e-06		197.902
NM_011432	140	289	408	365	354		164	259	695	372.667				2.06429	2.91429	2.60714			1.17143	1.85	4.96429					0.000965522	0.000212939	0.000153118	0.00044386		1.47963e-06	1.95451e-06	3.2957e-06	2.24328e-06		197.862
NM_009672	228	952	999	523	824.667		881	615	1525	1007				4.17544	4.38158	2.29386			3.86404	2.69737	6.6886					0.00195296	0.00032015	0.000134719	0.000802611		4.88066e-06	2.84975e-06	4.44043e-06	4.05695e-06		197.836
NM_025348	65	322	440	368	376.667		346	257	500	367.667				4.95385	6.76923	5.66154			5.32308	3.95385	7.69231					0.00231705	0.00049461	0.000332504	0.00104805		6.72357e-06	4.17721e-06	5.10678e-06	5.33585e-06		196.417
NM_139304	575	380	421	346	382.333		350	281	645	425.333				0.66087	0.732174	0.601739			0.608696	0.488696	1.12174					0.000309106	5.3498e-05	3.53403e-05	0.000132648		7.68842e-07	5.16304e-07	7.44701e-07	6.76616e-07		196.047
NM_001170486	59	1391	1923	1371	1561.67		799	1340	3091	1743.33				23.5763	32.5932	23.2373			13.5424	22.7119	52.3898					0.0110273	0.0023815	0.00136473	0.0049245		1.71053e-05	2.39949e-05	3.47806e-05	2.52936e-05		194.693
NM_001077265	336	814	879	653	782		683	814	1176	891				2.42262	2.61607	1.94345			2.03274	2.42262	3.5					0.00113312	0.000191149	0.000114139	0.000479471		2.56755e-06	2.55948e-06	2.32358e-06	2.48354e-06		193.06
NM_001190258	65	668	1107	637	804		1373	202	433	669.333				10.2769	17.0308	9.8			21.1231	3.10769	6.66154					0.00480679	0.00124439	0.000575556	0.00220891		2.66805e-05	3.28326e-06	4.42247e-06	1.14621e-05		192.715
NM_027015	65	668	1107	637	804		1373	202	433	669.333				10.2769	17.0308	9.8			21.1231	3.10769	6.66154					0.00480679	0.00124439	0.000575556	0.00220891		2.66805e-05	3.28326e-06	4.42247e-06	1.14621e-05		192.715
NM_021406	211	181	110	62	117.667		146	207	146	166.333				0.85782	0.521327	0.293839			0.691943	0.981043	0.691943					0.000401225	3.8092e-05	1.72572e-05	0.000152192		8.73992e-07	1.03647e-06	4.59368e-07	7.89942e-07		192.662
NM_053263	338	2194	3866	2581	2880.33		2644	1888	3414	2648.67				6.49112	11.4379	7.63609			7.82249	5.5858	10.1006					0.00303607	0.000835735	0.00044847	0.00144009		9.88057e-06	5.90136e-06	6.70559e-06	7.49584e-06		192.119
NM_001077266	317	798	849	640	762.333		672	807	1178	885.667				2.51735	2.67823	2.01893			2.11987	2.54574	3.71609					0.00117743	0.000195691	0.000118572	0.000497232		2.67761e-06	2.68956e-06	2.46704e-06	2.6114e-06		190.408
NM_001163006	57	174	477	343	331.333		178	199	424	267				3.05263	8.36842	6.01754			3.12281	3.49123	7.4386					0.0014278	0.000611459	0.000353412	0.000797556		3.94441e-06	3.68846e-06	4.93834e-06	4.19041e-06		190.329
NM_011660	86	1431	2771	1577	1926.33		938	1296	3796	2010				16.6395	32.2209	18.3372			10.907	15.0698	44.1395					0.00778276	0.0023543	0.00107695	0.003738		1.37766e-05	1.59211e-05	2.93034e-05	1.9667e-05		190.064
NM_026933	57	120	167	136	141		75	134	249	152.667				2.10526	2.92982	2.38596			1.31579	2.35088	4.36842					0.000984688	0.000214075	0.000140128	0.000446297		1.66197e-06	2.48369e-06	2.90011e-06	2.34859e-06		190.028
NM_010399	360	2539	1604	1845	1996		2627	1747	3435	2603				7.05278	4.45556	5.125			7.29722	4.85278	9.54167					0.00329877	0.000325556	0.000300993	0.00130844		9.21711e-06	5.12693e-06	6.33453e-06	6.89286e-06		189.826
NM_010397	360	2539	1604	1845	1996		2627	1747	3435	2603				7.05278	4.45556	5.125			7.29722	4.85278	9.54167					0.00329877	0.000325556	0.000300993	0.00130844		9.21711e-06	5.12693e-06	6.33453e-06	6.89286e-06		189.826
NM_009853	316	12976	15193	12286	13485		10332	10400	26634	15788.7				41.0633	48.0791	38.8797			32.6962	32.9114	84.2848					0.0192064	0.00351301	0.00228342	0.00833428		4.12985e-05	3.47707e-05	5.59551e-05	4.40081e-05		189.381
NM_026775	200	2344	2691	2053	2362.67		1829	2323	4067	2739.67				11.72	13.455	10.265			9.145	11.615	20.335					0.00548176	0.000983121	0.000602866	0.00235592		1.1551e-05	1.22712e-05	1.35e-05	1.24407e-05		189.371
NM_025885	225	136	181	121	146		88	84	367	179.667				0.604444	0.804444	0.537778			0.391111	0.373333	1.63111					0.000282715	5.87786e-05	3.15838e-05	0.000124359		4.94012e-07	3.94424e-07	1.08286e-06	6.571e-07		189.254
NM_007478	162	497	607	462	522		287	544	1033	621.333				3.0679	3.74691	2.85185			1.7716	3.35802	6.37654					0.00143494	0.000273777	0.00016749	0.000625402		2.23771e-06	3.54773e-06	4.23327e-06	3.33957e-06		187.27
NM_023248	231	260	346	223	276.333		254	191	504	316.333				1.12554	1.49784	0.965368			1.09957	0.82684	2.18182					0.000526446	0.000109443	5.66963e-05	0.000230862		1.38886e-06	8.73551e-07	1.44847e-06	1.23696e-06		186.636
NM_010798	96	2072	3714	3485	3090.33		2428	1421	4787	2878.67				21.5833	38.6875	36.3021			25.2917	14.8021	49.8646					0.0100951	0.00282679	0.00213203	0.00501798		3.19459e-05	1.56383e-05	3.31042e-05	2.68961e-05		186.569
NM_010591	315	661	911	600	724		546	777	1055	792.667				2.09841	2.89206	1.90476			1.73333	2.46667	3.34921					0.000981484	0.000211315	0.000111867	0.000434889		2.18937e-06	2.60602e-06	2.22347e-06	2.33962e-06		185.88
NM_024433	264	395	360	241	332		204	391	818	471				1.49621	1.36364	0.912879			0.772727	1.48106	3.09848					0.000699819	9.96373e-05	5.36136e-05	0.000284357		9.76031e-07	1.56473e-06	2.05703e-06	1.5326e-06		185.539
NM_001110152	115	290	235	182	235.667		270	240	435	315				2.52174	2.04348	1.58261			2.34783	2.08696	3.78261					0.00117949	0.000149312	9.2947e-05	0.000473915		2.96554e-06	2.20486e-06	2.5112e-06	2.56053e-06		185.084
NM_010499	202	73	150	161	128		62	100	167	109.667				0.361386	0.742574	0.79703			0.306931	0.49505	0.826733					0.00016903	5.42579e-05	4.68098e-05	9.00326e-05		3.87684e-07	5.23017e-07	5.48852e-07	4.86518e-07		185.055
NM_008848	614	748	730	415	631		625	797	1028	816.667				1.21824	1.18893	0.675896			1.01792	1.29805	1.67427					0.000569804	8.68716e-05	3.96955e-05	0.000232124		1.28573e-06	1.37138e-06	1.11151e-06	1.25621e-06		184.782
NM_025617	188	149	220	144	171		89	181	311	193.667				0.792553	1.17021	0.765957			0.473404	0.962766	1.65426					0.000370698	8.55044e-05	4.49849e-05	0.000167063		5.97956e-07	1.01716e-06	1.09823e-06	9.04447e-07		184.712
NM_023585	126	528	358	283	389.667		246	531	1057	611.333				4.19048	2.84127	2.24603			1.95238	4.21429	8.38889					0.00196	0.000207604	0.00013191	0.000766504		2.46605e-06	4.45237e-06	5.56922e-06	4.16255e-06		184.143
NM_146130	360	2308	3957	2666	2977		2969	2020	3623	2870.67				6.41111	10.9917	7.40556			8.24722	5.61111	10.0639					0.00299865	0.000803132	0.00043493	0.00141224		1.04171e-05	5.9281e-06	6.68122e-06	7.67546e-06		183.994
NM_133792	393	955	1121	1047	1041		1212	771	1307	1096.67				2.43003	2.85242	2.66412			3.08397	1.96183	3.3257					0.00113659	0.000208419	0.000156465	0.00050049		3.89536e-06	2.07266e-06	2.20787e-06	2.7253e-06		183.646
NM_019979	75	472	567	263	434		429	404	820	551				6.29333	7.56	3.50667			5.72	5.38667	10.9333					0.00294356	0.000552389	0.000205947	0.00123397		7.22492e-06	5.69098e-06	7.25843e-06	6.72478e-06		183.495
NM_010270	87	111	204	140	151.667		116	130	190	145.333				1.27586	2.34483	1.6092			1.33333	1.49425	2.18391					0.000596755	0.00017133	9.45085e-05	0.000287531		1.68413e-06	1.57867e-06	1.44986e-06	1.57089e-06		183.038
NM_028358	133	262	175	116	184.333		94	225	633	317.333				1.96992	1.31579	0.87218			0.706767	1.69173	4.7594					0.000921387	9.61413e-05	5.12234e-05	0.00035625		8.92716e-07	1.7873e-06	3.15967e-06	1.94656e-06		183.015
NM_009861	172	7075	7778	5191	6681.33		5885	5944	13785	8538				41.1337	45.2209	30.1802			34.2151	34.5581	80.1453					0.0192393	0.00330417	0.00177249	0.00810534		4.32171e-05	3.65105e-05	5.3207e-05	4.43115e-05		182.917
NM_172728	338	81	219	98	132.667		113	92	132	112.333				0.239645	0.647929	0.289941			0.33432	0.272189	0.390533					0.000112088	4.73425e-05	1.70283e-05	5.88197e-05		4.22278e-07	2.87566e-07	2.59267e-07	3.23037e-07		182.083
NM_026552	149	3103	4197	3262	3520.67		2543	2835	6779	4052.33				20.8255	28.1678	21.8926			17.0671	19.0268	45.4966					0.00974065	0.00205815	0.00128576	0.00436152		2.15574e-05	2.01017e-05	3.02044e-05	2.39545e-05		182.075
NM_010436	124	3736	7556	8128	6473.33		2561	3470	12631	6220.67				30.129	60.9355	65.5484			20.6532	27.9839	101.863					0.0140922	0.0044524	0.00384967	0.00746474		2.60871e-05	2.95648e-05	6.76248e-05	4.10922e-05		181.658
NM_009744	688	788	742	982	837.333		787	537	1637	987				1.14535	1.07849	1.42733			1.1439	0.780523	2.37936					0.00053571	7.88023e-05	8.38272e-05	0.00023278		1.44485e-06	8.24618e-07	1.57961e-06	1.28303e-06		181.43
NM_011410	583	266	219	138	207.667		482	121	126	243				0.456261	0.375643	0.236707			0.826758	0.207547	0.216123					0.000213405	2.74473e-05	1.39018e-05	8.49182e-05		1.04428e-06	2.19272e-07	1.4348e-07	4.6901e-07		181.058
NM_011290	277	4623	6157	4251	5010.33		3646	3100	11960	6235.33				16.6895	22.2274	15.3466			13.1625	11.1913	43.1769					0.00780614	0.0016241	0.000901308	0.00344385		1.66255e-05	1.18236e-05	2.86643e-05	1.90378e-05		180.895
NM_030087	449	371	481	339	397		368	252	806	475.333				0.826281	1.07127	0.755011			0.819599	0.561247	1.7951					0.000386474	7.82748e-05	4.4342e-05	0.000169697		1.03523e-06	5.92954e-07	1.19173e-06	9.39974e-07		180.534
NM_001161111	151	424	424	268	372		245	611	608	488				2.80795	2.80795	1.77483			1.62252	4.04636	4.02649					0.00131335	0.000205169	0.000104236	0.000540919		2.0494e-06	4.27495e-06	2.67311e-06	2.99915e-06		180.357
NM_027218	157	134	258	110	167.333		114	191	216	173.667				0.853503	1.64331	0.700637			0.726115	1.21656	1.3758					0.000399206	0.000120072	4.11486e-05	0.000186809		9.17154e-07	1.28529e-06	9.13365e-07	1.0386e-06		179.866
NM_025947	77	334	619	397	450		242	428	743	471				4.33766	8.03896	5.15584			3.14286	5.55844	9.64935					0.00202884	0.000587386	0.000302804	0.00097301		3.96974e-06	5.87246e-06	6.40602e-06	5.41607e-06		179.652
NM_178796	210	175	265	80	173.333		124	256	251	210.333				0.833333	1.2619	0.380952			0.590476	1.21905	1.19524					0.000389772	9.22041e-05	2.23734e-05	0.000168117		7.45829e-07	1.28792e-06	7.93496e-07	9.42414e-07		178.389
NM_013831	315	139	176	86	133.667		140	140	218	166				0.44127	0.55873	0.273016			0.444444	0.444444	0.692063					0.000206394	4.08249e-05	1.60343e-05	8.7751e-05		5.61377e-07	4.69553e-07	4.59448e-07	4.96793e-07		176.635
NM_009735	100	43209	26000	19380	29529.7		39612	29602	76096	48436.7				432.09	260	193.8			396.12	296.02	760.96					0.2021	0.0189975	0.0113819	0.0774932		0.000500339	0.000312743	0.000505187	0.000439423		176.352
NM_009084	73	2134	3207	2057	2466		1806	2140	4754	2900				29.2329	43.9315	28.1781			24.7397	29.3151	65.1233					0.013673	0.00320996	0.00165491	0.00617929		3.12487e-05	3.09712e-05	4.32341e-05	3.51513e-05		175.791
NM_026620	410	250	271	215	245.333		324	197	350	290.333				0.609756	0.660976	0.52439			0.790244	0.480488	0.853659					0.000285199	4.82957e-05	3.07976e-05	0.000121431		9.98156e-07	5.07632e-07	5.66728e-07	6.90839e-07		175.773
NM_025313	149	775	1076	938	929.667		477	653	2306	1145.33				5.20134	7.22148	6.2953			3.20134	4.38255	15.4765					0.00243281	0.000527654	0.000369725	0.00111006		4.04361e-06	4.63014e-06	1.02746e-05	6.3161e-06		175.751
NM_015749	411	1094	1035	651	926.667		986	1200	1576	1254				2.6618	2.51825	1.58394			2.39903	2.91971	3.83455					0.001245	0.000184002	9.30253e-05	0.000507341		3.03021e-06	3.08465e-06	2.54568e-06	2.88685e-06		175.742
NM_001130458	411	1094	1035	651	926.667		986	1200	1576	1254				2.6618	2.51825	1.58394			2.39903	2.91971	3.83455					0.001245	0.000184002	9.30253e-05	0.000507341		3.03021e-06	3.08465e-06	2.54568e-06	2.88685e-06		175.742
NM_001130459	411	1094	1035	651	926.667		986	1200	1576	1254				2.6618	2.51825	1.58394			2.39903	2.91971	3.83455					0.001245	0.000184002	9.30253e-05	0.000507341		3.03021e-06	3.08465e-06	2.54568e-06	2.88685e-06		175.742
NM_133697	80	122	169	142	144.333		117	90	303	170				1.525	2.1125	1.775			1.4625	1.125	3.7875					0.000713283	0.000154355	0.000104246	0.000323961		1.84728e-06	1.18856e-06	2.51445e-06	1.8501e-06		175.105
NM_001039175	183	598	775	447	606.667		709	527	949	728.333				3.26776	4.23497	2.44262			3.87432	2.87978	5.18579					0.00152842	0.000309438	0.000143456	0.000660438		4.89364e-06	3.04247e-06	3.44275e-06	3.79295e-06		174.122
NM_007990	114	1736	2948	1992	2225.33		1228	1359	5464	2683.67				15.2281	25.8596	17.4737			10.7719	11.9211	47.9298					0.00712258	0.0018895	0.00102623	0.0033461		1.3606e-05	1.25945e-05	3.18197e-05	1.93401e-05		173.014
NM_001160239	114	1736	2948	1992	2225.33		1228	1359	5464	2683.67				15.2281	25.8596	17.4737			10.7719	11.9211	47.9298					0.00712258	0.0018895	0.00102623	0.0033461		1.3606e-05	1.25945e-05	3.18197e-05	1.93401e-05		173.014
NM_001190436	114	1736	2948	1992	2225.33		1228	1359	5464	2683.67				15.2281	25.8596	17.4737			10.7719	11.9211	47.9298					0.00712258	0.0018895	0.00102623	0.0033461		1.3606e-05	1.25945e-05	3.18197e-05	1.93401e-05		173.014
NM_018860	6	176	365	128	223		131	127	564	274				29.3333	60.8333	21.3333			21.8333	21.1667	94					0.01372	0.00444493	0.00125291	0.00647261		2.75776e-05	2.23625e-05	6.24048e-05	3.74483e-05		172.841
NM_001145799	94	2880	2374	1900	2384.67		2570	2400	5533	3501				30.6383	25.2553	20.2128			27.3404	25.5319	58.8617					0.0143304	0.00184534	0.0011871	0.0057876		3.45336e-05	2.69743e-05	3.90772e-05	3.35284e-05		172.618
NM_011653	432	11617	18022	15915	15184.7		10516	11324	29050	16963.3				26.8912	41.7176	36.8403			24.3426	26.213	67.2454					0.0125777	0.00304819	0.00216364	0.00592986		3.07471e-05	2.76938e-05	4.46429e-05	3.43613e-05		172.574
NM_008630	42	74	160	191	141.667		143	44	160	115.667				1.7619	3.80952	4.54762			3.40476	1.04762	3.80952					0.00082409	0.000278352	0.000267083	0.000456508		4.30055e-06	1.1068e-06	2.52907e-06	2.64547e-06		172.562
NM_133950	193	1166	1003	750	973		703	1348	2303	1451.33				6.04145	5.19689	3.88601			3.64249	6.98446	11.9326					0.00282575	0.000379723	0.000228226	0.00114457		4.60082e-06	7.37904e-06	7.92185e-06	6.6339e-06		172.533
NM_152806	251	322	364	333	339.667		385	198	671	418				1.28287	1.4502	1.32669			1.53386	0.788845	2.67331					0.000600032	0.000105962	7.7917e-05	0.000261304		1.93742e-06	8.3341e-07	1.77476e-06	1.5152e-06		172.455
NM_025426	214	169	159	93	140.333		136	186	286	202.667				0.78972	0.742991	0.434579			0.635514	0.869159	1.33645					0.000369373	5.42884e-05	2.5523e-05	0.000149728		8.02717e-07	9.18261e-07	8.87243e-07	8.69407e-07		172.219
NM_001104556	214	169	159	93	140.333		136	186	286	202.667				0.78972	0.742991	0.434579			0.635514	0.869159	1.33645					0.000369373	5.42884e-05	2.5523e-05	0.000149728		8.02717e-07	9.18261e-07	8.87243e-07	8.69407e-07		172.219
NM_001104530	214	169	159	93	140.333		136	186	286	202.667				0.78972	0.742991	0.434579			0.635514	0.869159	1.33645					0.000369373	5.42884e-05	2.5523e-05	0.000149728		8.02717e-07	9.18261e-07	8.87243e-07	8.69407e-07		172.219
NM_001104557	214	169	159	93	140.333		136	186	286	202.667				0.78972	0.742991	0.434579			0.635514	0.869159	1.33645					0.000369373	5.42884e-05	2.5523e-05	0.000149728		8.02717e-07	9.18261e-07	8.87243e-07	8.69407e-07		172.219
NM_010686	242	10607	11472	8225	10101.3		9889	10066	20128	13361				43.8306	47.405	33.9876			40.8636	41.595	83.1736					0.0205007	0.00346376	0.0019961	0.00865353		5.16148e-05	4.39449e-05	5.52173e-05	5.0259e-05		172.179
NM_025790	121	190	328	169	229		159	150	533	280.667				1.57025	2.71074	1.39669			1.31405	1.23967	4.40496					0.000734447	0.000198067	8.20282e-05	0.000338181		1.65977e-06	1.3097e-06	2.92437e-06	1.96462e-06		172.136
NM_025349	84	130	173	142	148.333		149	75	314	179.333				1.54762	2.05952	1.69048			1.77381	0.892857	3.7381					0.000723863	0.000150484	9.92821e-05	0.000324543		2.2405e-06	9.43298e-07	2.48165e-06	1.88848e-06		171.854
NM_007793	79	2960	3810	2702	3157.33		1637	3402	7451	4163.33				37.4684	48.2278	34.2025			20.7215	43.0633	94.3165					0.017525	0.00352388	0.00200872	0.00768585		2.61733e-05	4.54961e-05	6.26149e-05	4.47614e-05		171.707
NM_027179	274	982	1222	901	1035		1023	883	1928	1278				3.58394	4.45985	3.28832			3.73358	3.22263	7.0365					0.00167631	0.00032587	0.000193124	0.000731766		4.71587e-06	3.40469e-06	4.6714e-06	4.26399e-06		171.616
NM_175397	426	554	504	288	448.667		777	360	696	611				1.30047	1.1831	0.676056			1.82394	0.84507	1.6338					0.000608264	8.64459e-05	3.9705e-05	0.000244805		2.30382e-06	8.92812e-07	1.08465e-06	1.42709e-06		171.541
NM_030194	426	554	504	288	448.667		777	360	696	611				1.30047	1.1831	0.676056			1.82394	0.84507	1.6338					0.000608264	8.64459e-05	3.9705e-05	0.000244805		2.30382e-06	8.92812e-07	1.08465e-06	1.42709e-06		171.541
NM_021274	79	210	109	58	125.667		279	176	153	202.667				2.65823	1.37975	0.734177			3.53165	2.22785	1.93671					0.00124332	0.000100814	4.31184e-05	0.000462419		4.46082e-06	2.35371e-06	1.28574e-06	2.70009e-06		171.261
NM_025379	61	578	1466	910	984.667		373	872	1701	982				9.47541	24.0328	14.918			6.11475	14.2951	27.8852					0.0044319	0.00175601	0.00087614	0.00235469		7.72354e-06	1.51027e-05	1.85125e-05	1.37796e-05		170.882
NM_001166411	134	2131	2854	1968	2317.67		1604	1806	5730	3046.67				15.903	21.2985	14.6866			11.9701	13.4776	42.7612					0.00743825	0.00155623	0.000862546	0.00328567		1.51195e-05	1.4239e-05	2.83883e-05	1.92489e-05		170.694
NM_001085409	469	344	371	276	330.333		479	243	505	409				0.733475	0.791045	0.588486			1.02132	0.518124	1.07676					0.000343066	5.77996e-05	3.45619e-05	0.000145143		1.29003e-06	5.47394e-07	7.1484e-07	8.50755e-07		170.604
NM_133186	469	344	371	276	330.333		479	243	505	409				0.733475	0.791045	0.588486			1.02132	0.518124	1.07676					0.000343066	5.77996e-05	3.45619e-05	0.000145143		1.29003e-06	5.47394e-07	7.1484e-07	8.50755e-07		170.604
NM_001111062	246	417	455	290	387.333		406	417	739	520.667				1.69512	1.84959	1.17886			1.65041	1.69512	3.00407					0.000792854	0.000135145	6.92348e-05	0.000332411		2.08463e-06	1.79089e-06	1.99434e-06	1.95662e-06		169.891
NM_001111063	246	417	455	290	387.333		406	417	739	520.667				1.69512	1.84959	1.17886			1.65041	1.69512	3.00407					0.000792854	0.000135145	6.92348e-05	0.000332411		2.08463e-06	1.79089e-06	1.99434e-06	1.95662e-06		169.891
NM_007744	246	417	455	290	387.333		406	417	739	520.667				1.69512	1.84959	1.17886			1.65041	1.69512	3.00407					0.000792854	0.000135145	6.92348e-05	0.000332411		2.08463e-06	1.79089e-06	1.99434e-06	1.95662e-06		169.891
NM_013535	107	219	297	376	297.333		384	116	382	294				2.04673	2.7757	3.51402			3.58879	1.08411	3.57009					0.00095731	0.000202813	0.000206379	0.000455501		4.53299e-06	1.14536e-06	2.37012e-06	2.68282e-06		169.784
NM_007516	287	657	738	520	638.333		620	769	1074	821				2.2892	2.57143	1.81185			2.16028	2.67944	3.74216					0.00107072	0.000187888	0.00010641	0.000455006		2.72864e-06	2.83081e-06	2.48435e-06	2.68127e-06		169.698
NM_001159887	177	676	891	704	757		448	860	1549	952.333				3.81921	5.0339	3.9774			2.53107	4.85876	8.75141					0.00178635	0.000367814	0.000233594	0.000795918		3.19699e-06	5.13325e-06	5.8099e-06	4.71338e-06		168.864
NM_016666	311	356	460	392	402.667		380	283	832	498.333				1.14469	1.4791	1.26045			1.22186	0.909968	2.67524					0.000535404	0.000108074	7.40266e-05	0.000239168		1.54334e-06	9.61375e-07	1.77604e-06	1.42692e-06		167.612
NM_153592	321	389	364	293	348.667		331	443	696	490				1.21184	1.13396	0.912773			1.03115	1.38006	2.16822					0.000566809	8.28552e-05	5.36074e-05	0.000234424		1.30245e-06	1.45803e-06	1.43944e-06	1.39997e-06		167.449
NM_019830	352	779	875	638	764		998	701	1187	962				2.21307	2.4858	1.8125			2.83523	1.99148	3.37216					0.00103511	0.000181631	0.000106449	0.000441064		3.58117e-06	2.10398e-06	2.23871e-06	2.64129e-06		166.988
NM_212468	129	272	207	140	206.333		149	242	690	360.333				2.10853	1.60465	1.08527			1.15504	1.87597	5.34884					0.000986215	0.000117248	6.37383e-05	0.000389067		1.45893e-06	1.98195e-06	3.55099e-06	2.33062e-06		166.937
NM_025315	125	246	304	234	261.333		144	288	632	354.667				1.968	2.432	1.872			1.152	2.304	5.056					0.000920486	0.0001777	0.000109943	0.00040271		1.45509e-06	2.43416e-06	3.35658e-06	2.41528e-06		166.734
NM_001077267	268	641	708	507	618.667		609	762	1076	815.667				2.39179	2.64179	1.89179			2.27239	2.84328	4.01493					0.0011187	0.000193029	0.000111105	0.00047428		2.87025e-06	3.00391e-06	2.66543e-06	2.84653e-06		166.617
NM_026560	270	174	420	351	315		107	198	681	328.667				0.644444	1.55556	1.3			0.396296	0.733333	2.52222					0.000301424	0.00011366	7.63493e-05	0.000163811		5.00561e-07	7.74762e-07	1.67446e-06	9.8326e-07		166.6
NM_001159888	170	674	880	689	747.667		464	858	1552	958				3.96471	5.17647	4.05294			2.72941	5.04706	9.12941					0.0018544	0.000378231	0.00023803	0.000823554		3.44752e-06	5.33219e-06	6.06084e-06	4.94685e-06		166.48
NM_019647	141	2840	3667	2700	3069		3260	1877	6694	3943.67				20.1418	26.0071	19.1489			23.1206	13.3121	47.4752					0.00942088	0.00190027	0.00112462	0.00414859		2.92036e-05	1.40641e-05	3.15179e-05	2.49285e-05		166.42
NM_024220	101	636	717	504	619		427	741	1443	870.333				6.29703	7.09901	4.9901			4.22772	7.33663	14.2871					0.00294529	0.000518706	0.00029307	0.00125236		5.34003e-06	7.75111e-06	9.48495e-06	7.52536e-06		166.418
NM_172149	209	147	205	156	169.333		125	129	398	217.333				0.703349	0.980861	0.746411			0.598086	0.617225	1.90431					0.000328975	7.16689e-05	4.38369e-05	0.00014816		7.55442e-07	6.52094e-07	1.26423e-06	8.9059e-07		166.362
NM_183146	954	192	160	121	157.667		164	177	390	243.667				0.201258	0.167715	0.126834			0.171908	0.185535	0.408805					9.41337e-05	1.22545e-05	7.44902e-06	3.79457e-05		2.17136e-07	1.96016e-07	2.71398e-07	2.28183e-07		166.295
NM_028211	237	130	121	127	126		113	121	291	175				0.548523	0.510549	0.535865			0.476793	0.510549	1.22785					0.000256559	3.73044e-05	3.14715e-05	0.000108445		6.02237e-07	5.39391e-07	8.15145e-07	6.52258e-07		166.261
NM_001252476	334	779	874	639	764		1002	706	1190	966				2.33234	2.61677	1.91317			3	2.11377	3.56287					0.0010909	0.0001912	0.000112361	0.000464819		3.78929e-06	2.23319e-06	2.36532e-06	2.79594e-06		166.248
NM_026932	287	510	316	266	364		631	345	764	580				1.777	1.10105	0.926829			2.19861	1.20209	2.66202					0.000831152	8.04505e-05	5.44329e-05	0.000322012		2.77706e-06	1.27e-06	1.76727e-06	1.93811e-06		166.148
NM_007796	118	3128	2669	2221	2672.67		3212	2585	5999	3932				26.5085	22.6186	18.822			27.2203	21.9068	50.839					0.0123987	0.00165268	0.00110542	0.00505228		3.4382e-05	2.31444e-05	3.3751e-05	3.04258e-05		166.052
NM_001159889	170	674	880	689	747.667		463	858	1569	963.333				3.96471	5.17647	4.05294			2.72353	5.04706	9.22941					0.0018544	0.000378231	0.00023803	0.000823554		3.44009e-06	5.33219e-06	6.12723e-06	4.9665e-06		165.822
NM_008211	117	1992	2681	1925	2199.33		2006	1774	4666	2815.33				17.0256	22.9145	16.453			17.1453	15.1624	39.8803					0.00796335	0.0016743	0.000966288	0.00353465		2.16562e-05	1.6019e-05	2.64758e-05	2.13837e-05		165.297
NM_134118	289	1072	1328	944	1114.67		1182	994	2129	1435				3.70934	4.59516	3.26644			4.08997	3.43945	7.36678					0.00173496	0.000335756	0.000191839	0.000754185		5.16603e-06	3.63375e-06	4.89067e-06	4.56348e-06		165.265
NM_001164729	55	246	378	591	405		273	254	695	407.333				4.47273	6.87273	10.7455			4.96364	4.61818	12.6364					0.00209201	0.000502172	0.000631083	0.00107509		6.26956e-06	4.87908e-06	8.38904e-06	6.51256e-06		165.079
NM_001127233	362	660	760	730	716.667		537	499	1899	978.333				1.8232	2.09945	2.01657			1.48343	1.37845	5.24586					0.000852762	0.000153401	0.000118434	0.000374866		1.87371e-06	1.45633e-06	3.48262e-06	2.27089e-06		165.074
NM_009078	177	4265	5003	4418	4562		4628	3217	10086	5977				24.096	28.2655	24.9605			26.1469	18.1751	56.9831					0.0112704	0.00206529	0.00146593	0.00493386		3.30261e-05	1.92019e-05	3.783e-05	3.00193e-05		164.356
NM_011640	371	772	882	828	827.333		667	576	2180	1141				2.08086	2.37736	2.23181			1.79784	1.55256	5.87601					0.000973275	0.000173707	0.000131075	0.000426019		2.27085e-06	1.64027e-06	3.90097e-06	2.60403e-06		163.6
NM_001159483	175	4215	4941	4382	4512.67		4608	3192	10008	5936				24.0857	28.2343	25.04			26.3314	18.24	57.1886					0.0112655	0.002063	0.00147061	0.00493305		3.32592e-05	1.92704e-05	3.79664e-05	3.01653e-05		163.534
NM_010073	65	79	138	113	110		87	91	186	121.333				1.21538	2.12308	1.73846			1.33846	1.4	2.86154					0.000568468	0.000155128	0.0001021	0.000275232		1.69061e-06	1.47909e-06	1.89972e-06	1.68981e-06		162.878
NM_010494	258	144	116	106	122		130	125	313	189.333				0.55814	0.449612	0.410853			0.503876	0.484496	1.21318					0.000261057	3.2852e-05	2.41295e-05	0.000106013		6.36445e-07	5.11867e-07	8.05406e-07	6.51239e-07		162.786
NM_001166410	134	2131	2854	1968	2317.67		1694	1910	5977	3193.67				15.903	21.2985	14.6866			12.6418	14.2537	44.6045					0.00743825	0.00155623	0.000862546	0.00328567		1.59678e-05	1.5059e-05	2.96121e-05	2.0213e-05		162.553
NM_009455	174	328	342	217	295.667		469	226	522	405.667				1.88506	1.96552	1.24713			2.6954	1.29885	3					0.000881692	0.000143615	7.3244e-05	0.000366184		3.40456e-06	1.37223e-06	1.99164e-06	2.25614e-06		162.305
NM_001190310	190	134	270	114	172.667		123	209	261	197.667				0.705263	1.42105	0.6			0.647368	1.1	1.37368					0.000329871	0.000103833	3.52382e-05	0.000156314		8.1769e-07	1.16214e-06	9.11963e-07	9.63932e-07		162.163
NM_020569	170	572	702	510	594.667		567	377	1563	835.667				3.36471	4.12941	3			3.33529	2.21765	9.19412					0.00157376	0.000301725	0.000176191	0.000683893		4.2128e-06	2.34293e-06	6.1038e-06	4.21985e-06		162.066
NM_001025313	447	3127	2078	1631	2278.67		4378	2086	4266	3576.67				6.99553	4.64877	3.64877			9.79418	4.66667	9.54362					0.003272	0.000339673	0.000214293	0.00127532		1.2371e-05	4.9303e-06	6.33583e-06	7.87905e-06		161.862
NM_197979	45	566	473	338	459		745	268	1127	713.333				12.5778	10.5111	7.51111			16.5556	5.95556	25.0444					0.00588296	0.000768019	0.000441129	0.00236404		2.09113e-05	6.29201e-06	1.66265e-05	1.46099e-05		161.81
NM_053173	653	169	316	294	259.667		170	195	479	281.333				0.258806	0.48392	0.45023			0.260337	0.298622	0.733538					0.00012105	3.53588e-05	2.64421e-05	6.09504e-05		3.28831e-07	3.15492e-07	4.86982e-07	3.77102e-07		161.629
NM_026533	132	2256	3132	2181	2523		1746	2079	6530	3451.67				17.0909	23.7273	16.5227			13.2273	15.75	49.4697					0.00799388	0.00173369	0.000970384	0.00356598		1.67073e-05	1.66398e-05	3.2842e-05	2.2063e-05		161.627
NM_010880	688	3883	4352	3229	3821.33		4257	4354	6684	5098.33				5.6439	6.32558	4.69331			6.1875	6.32849	9.71512					0.0026398	0.000462194	0.00027564	0.00112588		7.81542e-06	6.68601e-06	6.44968e-06	6.9837e-06		161.215
NM_133801	489	399	606	464	489.667		412	301	1151	621.333				0.815951	1.23926	0.948875			0.842536	0.615542	2.35378					0.000381642	9.05497e-05	5.57277e-05	0.000175973		1.06421e-06	6.50316e-07	1.56263e-06	1.09238e-06		161.091
NM_026697	196	1382	1988	1034	1468		1250	1721	2869	1946.67				7.05102	10.1429	5.27551			6.37755	8.78061	14.6378					0.00329795	0.000741112	0.000309832	0.00144963		8.05547e-06	9.27666e-06	9.71773e-06	9.01662e-06		160.773
NM_170703	184	137	97	81	105		123	186	182	163.667				0.744565	0.527174	0.440217			0.668478	1.01087	0.98913					0.000348253	3.85192e-05	2.58541e-05	0.000137542		8.44354e-07	1.06798e-06	6.56665e-07	8.56332e-07		160.618
NM_011090	644	876	730	417	674.333		987	981	1137	1035				1.36025	1.13354	0.647516			1.53261	1.52329	1.76553					0.000636225	8.28248e-05	3.80288e-05	0.000252359		1.93584e-06	1.60935e-06	1.1721e-06	1.57243e-06		160.49
NM_026027	103	356	426	168	316.667		284	286	953	507.667				3.45631	4.13592	1.63107			2.75728	2.7767	9.25243					0.00161661	0.000302201	9.5793e-05	0.000671534		3.48272e-06	2.93357e-06	6.14251e-06	4.18626e-06		160.414
NM_028117	357	199	204	186	196.333		227	157	435	273				0.557423	0.571429	0.521008			0.635854	0.439776	1.21849					0.000260722	4.17528e-05	3.0599e-05	0.000111024		8.03147e-07	4.64621e-07	8.08931e-07	6.92233e-07		160.386
NM_029100	538	330	328	255	304.333		387	308	594	429.667				0.613383	0.609665	0.473978			0.719331	0.572491	1.10409					0.000286896	4.45466e-05	2.78368e-05	0.00011976		9.08586e-07	6.04833e-07	7.32984e-07	7.48801e-07		159.935
NM_025365	55	246	378	591	405		297	261	693	417				4.47273	6.87273	10.7455			5.4	4.74545	12.6					0.00209201	0.000502172	0.000631083	0.00107509		6.82073e-06	5.01354e-06	8.3649e-06	6.73306e-06		159.673
NM_001110311	151	365	342	330	345.667		467	278	704	483				2.41722	2.2649	2.18543			3.09272	1.84106	4.66225					0.0011306	0.00016549	0.000128351	0.000474813		3.9064e-06	1.94507e-06	3.09518e-06	2.98222e-06		159.215
NM_025997	100	259	205	125	196.333		136	305	615	352				2.59	2.05	1.25			1.36	3.05	6.15					0.00121141	0.000149788	7.34128e-05	0.000478204		1.71781e-06	3.22231e-06	4.08287e-06	3.00766e-06		158.995
NM_016883	212	254	277	206	245.667		233	285	536	351.333				1.19811	1.3066	0.971698			1.09906	1.34434	2.5283					0.00056039	9.54701e-05	5.70681e-05	0.000237643		1.38822e-06	1.42029e-06	1.67849e-06	1.49566e-06		158.888
NM_009151	398	1714	1564	1127	1468.33		1766	1576	3447	2263				4.30653	3.92965	2.83166			4.43719	3.9598	8.6608					0.00201428	0.000287129	0.000166304	0.000822571		5.6046e-06	4.1835e-06	5.74974e-06	5.17928e-06		158.82
NM_015783	142	563	531	183	425.667		1073	339	387	599.667				3.96479	3.73944	1.28873			7.55634	2.38732	2.72535					0.00185444	0.000273231	7.56876e-05	0.000734452		9.5444e-06	2.52219e-06	1.80931e-06	4.6253e-06		158.79
NM_026885	203	676	785	605	688.667		511	468	2167	1048.67				3.33005	3.867	2.9803			2.51724	2.30542	10.6749					0.00155755	0.000282551	0.000175034	0.000671713		3.17952e-06	2.43566e-06	7.08685e-06	4.23401e-06		158.647
NM_009438	184	2886	2711	1766	2454.33		2995	1899	6964	3952.67				15.6848	14.7337	9.59783			16.2772	10.3207	37.8478					0.00733619	0.00107655	0.000563683	0.00299214		2.05597e-05	1.09037e-05	2.51265e-05	1.88633e-05		158.623
NM_025858	216	2281	1990	1608	1959.67		2824	1787	4205	2938.67				10.5602	9.21296	7.44444			13.0741	8.27315	19.4676					0.00493928	0.000673167	0.000437214	0.00201655		1.65138e-05	8.74053e-06	1.29242e-05	1.27262e-05		158.457
NM_001110310	143	365	340	326	343.667		479	275	693	482.333				2.55245	2.37762	2.27972			3.34965	1.92308	4.84615					0.00119385	0.000173727	0.000133889	0.000500488		4.23094e-06	2.03172e-06	3.21727e-06	3.15998e-06		158.383
NM_015816	119	185	227	137	183		246	124	392	254				1.55462	1.90756	1.15126			2.06723	1.04202	3.29412					0.000727138	0.000139381	6.76138e-05	0.000311378		2.61111e-06	1.10088e-06	2.1869e-06	1.9663e-06		158.357
NM_016809	135	2076	2812	1924	2270.67		1865	1959	5634	3152.67				15.3778	20.8296	14.2519			13.8148	14.5111	41.7333					0.0071926	0.00152197	0.000837015	0.00318386		1.74495e-05	1.53309e-05	2.7706e-05	2.01621e-05		157.913
NM_010318	49	414	1007	753	724.667		315	669	1316	766.667				8.44898	20.551	15.3673			6.42857	13.6531	26.8571					0.00395181	0.00150161	0.000902528	0.00211865		8.11992e-06	1.44244e-05	1.78299e-05	1.34581e-05		157.426
NM_010705	245	13834	26525	18422	19593.7		9770	20217	40050	23345.7				56.4653	108.265	75.1918			39.8776	82.5184	163.469					0.0264103	0.00791066	0.00441604	0.0129123		5.03693e-05	8.71802e-05	0.000108524	8.20245e-05		157.421
NM_001145953	245	13834	26525	18422	19593.7		9770	20217	40050	23345.7				56.4653	108.265	75.1918			39.8776	82.5184	163.469					0.0264103	0.00791066	0.00441604	0.0129123		5.03693e-05	8.71802e-05	0.000108524	8.20245e-05		157.421
NM_001243769	172	5358	6642	4134	5378		5031	5551	12641	7741				31.1512	38.6163	24.0349			29.25	32.2733	73.4942					0.0145702	0.00282159	0.00141157	0.0062678		3.69456e-05	3.40965e-05	4.87914e-05	3.99445e-05		156.913
NM_133800	198	122	106	76	101.333		165	44	282	163.667				0.616162	0.535354	0.383838			0.833333	0.222222	1.42424					0.000288195	3.91169e-05	2.25429e-05	0.000116618		1.05258e-06	2.34776e-07	9.45528e-07	7.44295e-07		156.683
NM_001085518	641	103	126	92	107		172	82	146	133.333				0.160686	0.196568	0.143526			0.268331	0.127925	0.227769					7.51574e-05	1.43627e-05	8.4293e-06	3.26498e-05		3.38928e-07	1.35152e-07	1.51212e-07	2.08431e-07		156.646
NM_020491	180	86	127	128	113.667		154	43	189	128.667				0.477778	0.705556	0.711111			0.855556	0.238889	1.05					0.000223469	5.15531e-05	4.17637e-05	0.000105595		1.08065e-06	2.52385e-07	6.97075e-07	6.76704e-07		156.044
NM_001127188	642	126	97	90	104.333		70	106	387	187.667				0.196262	0.15109	0.140187			0.109034	0.165109	0.602804					9.17969e-05	1.10398e-05	8.23321e-06	3.70233e-05		1.37721e-07	1.74437e-07	4.0019e-07	2.37449e-07		155.921
NM_175657	84	7205	12310	14752	11422.3		17826	4123	9154	10367.7				85.7738	146.548	175.619			212.214	49.0833	108.976					0.0401187	0.0107078	0.0103142	0.0203802		0.000268048	5.18562e-05	7.23472e-05	0.00013075		155.871
NM_001195421	84	7205	12310	14752	11422.3		17826	4123	9154	10367.7				85.7738	146.548	175.619			212.214	49.0833	108.976					0.0401187	0.0107078	0.0103142	0.0203802		0.000268048	5.18562e-05	7.23472e-05	0.00013075		155.871
NM_018875	147	365	343	329	345.667		470	292	721	494.333				2.48299	2.33333	2.2381			3.19728	1.98639	4.90476					0.00116136	0.000170491	0.000131444	0.000487766		4.03848e-06	2.09861e-06	3.25618e-06	3.13109e-06		155.781
NM_010688	244	1260	1957	1558	1591.67		1229	1307	3565	2033.67				5.16393	8.02049	6.38525			5.03689	5.35656	14.6107					0.00241531	0.000586036	0.000375007	0.00112545		6.36208e-06	5.65917e-06	9.69974e-06	7.24033e-06		155.442
NM_011186	245	898	1517	1419	1278		802	1172	2565	1513				3.66531	6.19184	5.79184			3.27347	4.78367	10.4694					0.00171436	0.000452421	0.000340156	0.000835646		4.13471e-06	5.05392e-06	6.95043e-06	5.37969e-06		155.334
NM_145939	419	303	213	216	244		363	226	599	396				0.72315	0.508353	0.515513			0.866348	0.539379	1.42959					0.000338237	3.7144e-05	3.02762e-05	0.000135219		1.09428e-06	5.69851e-07	9.49081e-07	8.71072e-07		155.233
NM_018871	228	1874	2531	1895	2100		2585	1600	3932	2705.67				8.2193	11.1009	8.3114			11.3377	7.01754	17.2456					0.00384439	0.000811112	0.000488131	0.00171454		1.43207e-05	7.41399e-06	1.1449e-05	1.10612e-05		155.005
NM_025839	192	161	202	155	172.667		186	136	395	239				0.838542	1.05208	0.807292			0.96875	0.708333	2.05729					0.000392208	7.6873e-05	4.74124e-05	0.000172165		1.22363e-06	7.4835e-07	1.3658e-06	1.11259e-06		154.742
NM_170760	201	115	124	137	125.333		104	92	347	181				0.572139	0.616915	0.681592			0.517413	0.457711	1.72637					0.000267605	4.50764e-05	4.00301e-05	0.00011757		6.53543e-07	4.83569e-07	1.1461e-06	7.61072e-07		154.48
NM_023429	228	896	1229	959	1028		755	1167	2221	1381				3.92982	5.39035	4.20614			3.3114	5.11842	9.74123					0.00183808	0.000393859	0.000247028	0.000826324		4.18263e-06	5.40758e-06	6.46702e-06	5.35241e-06		154.384
NM_021538	289	930	1318	866	1038		1149	920	2035	1368				3.21799	4.56055	2.99654			3.97578	3.18339	7.04152					0.00150514	0.000333228	0.000175988	0.000671452		5.0218e-06	3.36323e-06	4.67473e-06	4.35326e-06		154.241
NM_001163333	619	1212	1119	878	1069.67		1490	972	2457	1639.67				1.958	1.80775	1.41842			2.40711	1.57027	3.96931					0.000915808	0.000132088	8.3304e-05	0.000377066		3.04041e-06	1.65899e-06	2.63515e-06	2.44485e-06		154.229
NM_001163332	619	1212	1119	878	1069.67		1490	972	2457	1639.67				1.958	1.80775	1.41842			2.40711	1.57027	3.96931					0.000915808	0.000132088	8.3304e-05	0.000377066		3.04041e-06	1.65899e-06	2.63515e-06	2.44485e-06		154.229
NM_030249	619	1212	1119	878	1069.67		1490	972	2457	1639.67				1.958	1.80775	1.41842			2.40711	1.57027	3.96931					0.000915808	0.000132088	8.3304e-05	0.000377066		3.04041e-06	1.65899e-06	2.63515e-06	2.44485e-06		154.229
NM_001166409	135	2076	2812	1924	2270.67		1937	2000	5762	3233				15.3778	20.8296	14.2519			14.3481	14.8148	42.6815					0.0071926	0.00152197	0.000837015	0.00318386		1.81231e-05	1.56518e-05	2.83354e-05	2.07034e-05		153.784
NM_178875	334	161	94	89	114.667		99	236	293	209.333				0.482036	0.281437	0.266467			0.296407	0.706587	0.877246					0.000225461	2.05639e-05	1.56497e-05	8.72249e-05		3.74391e-07	7.46505e-07	5.82387e-07	5.67761e-07		153.63
NM_010738	115	163	22	132	105.667		171	42	449	220.667				1.41739	0.191304	1.14783			1.48696	0.365217	3.90435					0.000662952	1.39781e-05	6.74121e-05	0.000248114		1.87817e-06	3.8585e-07	2.59202e-06	1.61868e-06		153.282
NM_026020	96	1812	1868	1493	1724.33		2399	1167	4120	2562				18.875	19.4583	15.5521			24.9896	12.1562	42.9167					0.00882834	0.00142177	0.000913378	0.00372116		3.15643e-05	1.2843e-05	2.84916e-05	2.42996e-05		153.137
NM_011072	121	6831	10136	6706	7891		5917	7385	19820	11040.7				56.4545	83.7686	55.4215			48.9008	61.0331	163.802					0.0264053	0.00612075	0.00325492	0.011927		6.17666e-05	6.44811e-05	0.000108745	7.83308e-05		152.264
NM_007653	219	3952	5791	2985	4242.67		3884	4865	9117	5955.33				18.0457	26.4429	13.6301			17.7352	22.2146	41.6301					0.00844044	0.00193211	0.000800501	0.00372435		2.24013e-05	2.34696e-05	2.76375e-05	2.45028e-05		151.997
NM_001042580	219	3952	5791	2985	4242.67		3884	4865	9117	5955.33				18.0457	26.4429	13.6301			17.7352	22.2146	41.6301					0.00844044	0.00193211	0.000800501	0.00372435		2.24013e-05	2.34696e-05	2.76375e-05	2.45028e-05		151.997
NM_001146057	365	472	549	453	491.333		558	417	1124	699.667				1.29315	1.50411	1.2411			1.52877	1.14247	3.07945					0.000604841	0.000109901	7.28899e-05	0.000262544		1.93098e-06	1.20701e-06	2.04439e-06	1.72746e-06		151.983
NM_001146058	331	472	547	451	490		558	417	1124	699.667				1.42598	1.65257	1.36254			1.6858	1.25982	3.39577					0.00066697	0.000120749	8.00222e-05	0.000289247		2.12933e-06	1.33099e-06	2.25439e-06	1.9049e-06		151.843
NM_178194	107	7320	20344	17532	15065.3		2506	15075	30374	15985				68.4112	190.131	163.85			23.4206	140.888	283.869					0.0319978	0.0138924	0.00962298	0.0185044		2.95825e-05	0.000148847	0.000188455	0.000122295		151.309
NM_001177653	107	7320	20344	17532	15065.3		2506	15075	30374	15985				68.4112	190.131	163.85			23.4206	140.888	283.869					0.0319978	0.0138924	0.00962298	0.0185044		2.95825e-05	0.000148847	0.000188455	0.000122295		151.309
NM_130889	253	400	747	413	520		491	633	708	610.667				1.58103	2.95257	1.63241			1.94071	2.50198	2.79842					0.000739489	0.000215736	9.58719e-05	0.000350366		2.45131e-06	2.64332e-06	1.85782e-06	2.31748e-06		151.184
NM_138607	320	458	536	326	440		510	416	1083	669.667				1.43125	1.675	1.01875			1.59375	1.3	3.38437					0.000669434	0.000122388	5.98314e-05	0.000283884		2.01306e-06	1.37344e-06	2.24682e-06	1.87778e-06		151.181
NM_008391	330	641	749	682	690.667		851	628	1315	931.333				1.94242	2.2697	2.06667			2.57879	1.90303	3.98485					0.000908524	0.000165841	0.000121376	0.00039858		3.25726e-06	2.01054e-06	2.64547e-06	2.63776e-06		151.106
NM_008885	141	2807	3203	1978	2662.67		3657	2856	5109	3874				19.9078	22.7163	14.0284			25.9362	20.2553	36.234					0.00931141	0.00165982	0.00082389	0.00393171		3.27599e-05	2.13996e-05	2.40551e-05	2.60715e-05		150.805
NM_016969	301	1979	2821	2148	2316		2329	2572	4045	2982				6.57475	9.37209	7.13621			7.73754	8.54485	13.4385					0.00307519	0.000684794	0.000419112	0.00139303		9.77328e-06	9.02758e-06	8.92159e-06	9.24082e-06		150.748
NM_001093764	301	1979	2821	2148	2316		2329	2572	4045	2982				6.57475	9.37209	7.13621			7.73754	8.54485	13.4385					0.00307519	0.000684794	0.000419112	0.00139303		9.77328e-06	9.02758e-06	8.92159e-06	9.24082e-06		150.748
NM_001093765	301	1979	2821	2148	2316		2329	2572	4045	2982				6.57475	9.37209	7.13621			7.73754	8.54485	13.4385					0.00307519	0.000684794	0.000419112	0.00139303		9.77328e-06	9.02758e-06	8.92159e-06	9.24082e-06		150.748
NM_001093766	301	1979	2821	2148	2316		2329	2572	4045	2982				6.57475	9.37209	7.13621			7.73754	8.54485	13.4385					0.00307519	0.000684794	0.000419112	0.00139303		9.77328e-06	9.02758e-06	8.92159e-06	9.24082e-06		150.748
NM_007507	52	296	593	353	414		653	230	417	433.333				5.69231	11.4038	6.78846			12.5577	4.42308	8.01923					0.00266245	0.000833249	0.000398688	0.00129813		1.58616e-05	4.67295e-06	5.32382e-06	8.61946e-06		150.604
NM_008997	199	519	608	474	533.667		662	390	1273	775				2.60804	3.05528	2.38191			3.32663	1.9598	6.39698					0.00121985	0.000223241	0.00013989	0.000527661		4.20186e-06	2.07052e-06	4.24684e-06	3.50641e-06		150.485
NM_001159393	285	178	192	168	179.333		190	139	491	273.333				0.624561	0.673684	0.589474			0.666667	0.487719	1.72281					0.000292124	4.92243e-05	3.46199e-05	0.000125323		8.42066e-07	5.15272e-07	1.14374e-06	8.33692e-07		150.323
NM_030720	377	1495	735	374	868		2248	1285	1448	1660.33				3.96552	1.9496	0.992042			5.96286	3.40849	3.84085					0.00185478	0.000142452	5.82629e-05	0.000685165		7.53168e-06	3.60105e-06	2.54987e-06	4.56087e-06		150.227
NM_001146211	181	174	213	169	185.333		172	171	474	272.333				0.961326	1.1768	0.933702			0.950276	0.944751	2.61878					0.000449638	8.59854e-05	5.48365e-05	0.00019682		1.20029e-06	9.98124e-07	1.73856e-06	1.31233e-06		149.978
NM_009942	110	635	1405	1125	1055		975	574	1912	1153.67				5.77273	12.7727	10.2273			8.86364	5.21818	17.3818					0.00270006	0.00093327	0.00060065	0.00141133		1.11956e-05	5.51298e-06	1.15395e-05	9.41603e-06		149.886
NM_183086	141	152	181	152	161.667		153	138	432	241				1.07801	1.28369	1.07801			1.08511	0.978723	3.06383					0.000504216	9.37957e-05	6.3312e-05	0.000220441		1.3706e-06	1.03402e-06	2.03402e-06	1.47954e-06		148.993
NM_009945	64	524	943	701	722.667		280	868	1680	942.667				8.1875	14.7344	10.9531			4.375	13.5625	26.25					0.00382951	0.0010766	0.00064328	0.0018498		5.52606e-06	1.43287e-05	1.74269e-05	1.24272e-05		148.851
NM_025419	136	142	183	169	164.667		91	204	411	235.333				1.04412	1.34559	1.24265			0.669118	1.5	3.02206					0.000488362	9.83186e-05	7.2981e-05	0.000219887		8.45161e-07	1.58474e-06	2.00629e-06	1.47873e-06		148.7
NM_001195390	110	153	114	73	113.333		128	141	387	218.667				1.39091	1.03636	0.663636			1.16364	1.28182	3.51818					0.000650566	7.57244e-05	3.89755e-05	0.000255088		1.46979e-06	1.35423e-06	2.33565e-06	1.71989e-06		148.317
NM_011157	133	1181	1870	1260	1437		1096	1460	3355	1970.33				8.8797	14.0602	9.47368			8.2406	10.9774	25.2256					0.00415327	0.00102734	0.000556392	0.00191233		1.04087e-05	1.15976e-05	1.67468e-05	1.29177e-05		148.04
NM_025498	82	301	349	370	340		247	390	823	486.667				3.67073	4.2561	4.5122			3.0122	4.7561	10.0366					0.0017169	0.000310982	0.000265002	0.000764295		3.8047e-06	5.02479e-06	6.6631e-06	5.1642e-06		147.999
NM_001167669	198	284	404	296	328		324	305	732	453.667				1.43434	2.0404	1.49495			1.63636	1.5404	3.69697					0.000670881	0.000149087	8.77988e-05	0.000302589		2.06689e-06	1.62743e-06	2.45435e-06	2.04955e-06		147.636
NM_009510	567	691	587	297	525		1116	571	892	859.667				1.21869	1.03527	0.52381			1.96825	1.00705	1.57319					0.000570016	7.56447e-05	3.07635e-05	0.000225475		2.4861e-06	1.06395e-06	1.04441e-06	1.53149e-06		147.226
NM_011093	498	565	578	286	476.333		545	789	1019	784.333				1.13454	1.16064	0.574297			1.09438	1.58434	2.04618					0.000530654	8.48051e-05	3.37286e-05	0.000216396		1.38231e-06	1.67384e-06	1.35842e-06	1.47152e-06		147.056
NM_001163791	167	190	195	160	181.667		136	179	612	309				1.13772	1.16766	0.958084			0.814371	1.07186	3.66467					0.000532144	8.53182e-05	5.62685e-05	0.000224577		1.02863e-06	1.13241e-06	2.43291e-06	1.53132e-06		146.656
NM_009318	446	3168	2089	1635	2297.33		4822	2357	4894	4024.33				7.10314	4.68386	3.66592			10.8117	5.28475	10.9731					0.00332233	0.000342237	0.0002153	0.00129329		1.36562e-05	5.58331e-06	7.28483e-06	8.84144e-06		146.276
NM_001031808	116	136	158	97	130.333		108	163	370	213.667				1.17241	1.36207	0.836207			0.931034	1.40517	3.18966					0.000548369	9.95228e-05	4.91106e-05	0.000232334		1.17599e-06	1.48456e-06	2.11755e-06	1.5927e-06		145.875
NM_029495	295	325	381	205	303.667		591	224	509	441.333				1.10169	1.29153	0.694915			2.00339	0.759322	1.72542					0.000515292	9.43684e-05	4.08125e-05	0.000216824		2.53048e-06	8.02219e-07	1.14548e-06	1.49272e-06		145.254
NM_008534	635	1251	1055	665	990.333		1447	1108	2763	1772.67				1.97008	1.66142	1.04724			2.27874	1.74488	4.35118					0.000921459	0.000121395	6.15049e-05	0.00036812		2.87827e-06	1.84346e-06	2.88867e-06	2.5368e-06		145.112
NM_001033450	406	1272	2166	1036	1491.33		1280	1911	2991	2060.67				3.133	5.33498	2.55172			3.15271	4.7069	7.367					0.00146539	0.000389813	0.000149863	0.000668356		3.98218e-06	4.97281e-06	4.89081e-06	4.61527e-06		144.814
NM_025554	191	294	310	240	281.333		288	229	901	472.667				1.53927	1.62304	1.25654			1.50785	1.19895	4.71728					0.000719957	0.000118591	7.37972e-05	0.000304115		1.90457e-06	1.26669e-06	3.13171e-06	2.10099e-06		144.749
NM_025300	185	102	169	178	149.667		105	122	340	189				0.551351	0.913514	0.962162			0.567568	0.659459	1.83784					0.000257882	6.6748e-05	5.6508e-05	0.000127046		7.16894e-07	6.96715e-07	1.22011e-06	8.77905e-07		144.715
NM_011482	109	504	600	451	518.333		404	589	1482	825				4.62385	5.50459	4.13761			3.70642	5.40367	13.5963					0.0021627	0.000402206	0.000243003	0.00093597		4.68158e-06	5.70894e-06	9.02635e-06	6.47229e-06		144.612
NM_007621	225	283	200	75	186		453	296	244	331				1.25778	0.888889	0.333333			2.01333	1.31556	1.08444					0.000588296	6.49488e-05	1.95768e-05	0.000224274		2.54304e-06	1.38988e-06	7.19942e-07	1.55095e-06		144.604
NM_026242	106	249	329	332	303.333		357	210	659	408.667				2.34906	3.10377	3.13208			3.36792	1.98113	6.21698					0.00109872	0.000226785	0.000183948	0.00050315		4.25402e-06	2.09305e-06	4.12734e-06	3.49147e-06		144.108
NM_008538	290	399	645	759	601		689	395	970	684.667				1.37586	2.22414	2.61724			2.37586	1.36207	3.34483					0.000643528	0.000162512	0.000153711	0.000319917		3.00095e-06	1.43902e-06	2.22057e-06	2.22018e-06		144.095
NM_001145804	214	777	913	661	783.667		490	1125	2188	1267.67				3.63084	4.26636	3.08879			2.28972	5.25701	10.2243					0.00169824	0.000311731	0.000181405	0.000730459		2.89214e-06	5.554e-06	6.78772e-06	5.07795e-06		143.849
NM_001146212	182	166	214	167	182.333		181	164	476	273.667				0.912088	1.17582	0.917582			0.994505	0.901099	2.61538					0.000426608	8.59144e-05	5.38898e-05	0.000188804		1.25616e-06	9.52005e-07	1.7363e-06	1.31482e-06		143.597
NM_021472	129	1881	1152	1067	1366.67		2158	1720	3929	2602.33				14.5814	8.93023	8.27132			16.7287	13.3333	30.4574					0.00682011	0.000652509	0.000485777	0.0026528		2.113e-05	1.40866e-05	2.02201e-05	1.84789e-05		143.558
NM_201239	129	1881	1152	1067	1366.67		2158	1720	3929	2602.33				14.5814	8.93023	8.27132			16.7287	13.3333	30.4574					0.00682011	0.000652509	0.000485777	0.0026528		2.113e-05	1.40866e-05	2.02201e-05	1.84789e-05		143.558
NM_001025608	133	113	133	121	122.333		126	93	344	187.667				0.849624	1	0.909774			0.947368	0.699248	2.58647					0.000397392	7.30674e-05	5.34313e-05	0.00017463		1.19662e-06	7.38751e-07	1.71711e-06	1.21749e-06		143.434
NM_011170	235	156	268	205	209.667		133	180	560	291				0.66383	1.14043	0.87234			0.565957	0.765957	2.38298					0.000310491	8.33279e-05	5.12328e-05	0.000148351		7.1486e-07	8.09229e-07	1.58201e-06	1.03537e-06		143.283
NM_010500	289	379	350	422	383.667		489	313	967	589.667				1.31142	1.21107	1.46021			1.69204	1.08304	3.34602					0.000613386	8.84899e-05	8.57584e-05	0.000262545		2.13721e-06	1.14423e-06	2.22136e-06	1.83427e-06		143.133
NM_175294	215	781	929	677	795.667		530	1124	2190	1281.33				3.63256	4.32093	3.14884			2.46512	5.22791	10.186					0.00169904	0.000315719	0.000184932	0.000733232		3.11368e-06	5.52325e-06	6.76232e-06	5.13309e-06		142.844
NM_133348	360	484	563	469	505.333		574	452	1306	777.333				1.34444	1.56389	1.30278			1.59444	1.25556	3.62778					0.000628833	0.000114269	7.65125e-05	0.000273205		2.01394e-06	1.32649e-06	2.40841e-06	1.91628e-06		142.57
NM_008251	77	106	101	125	110.667		129	125	235	163				1.37662	1.31169	1.62338			1.67532	1.62338	3.05195					0.000643884	9.58416e-05	9.53413e-05	0.000278356		2.1161e-06	1.71509e-06	2.02613e-06	1.95244e-06		142.568
NM_007874	170	1817	1451	1018	1428.67		2029	1884	3888	2600.33				10.6882	8.53529	5.98824			11.9353	11.0824	22.8706					0.00499917	0.000623651	0.000351691	0.00199151		1.50755e-05	1.17084e-05	1.51833e-05	1.39891e-05		142.361
NM_016963	333	948	1213	803	988		1037	1174	2291	1500.67				2.84685	3.64264	2.41141			3.11411	3.52553	6.87988					0.00133155	0.000266158	0.000141623	0.000579776		3.93343e-06	3.7247e-06	4.56742e-06	4.07518e-06		142.27
NM_016852	242	494	624	520	546		360	594	1623	859				2.04132	2.57851	2.14876			1.4876	2.45455	6.70661					0.000954781	0.000188405	0.000126197	0.000423128		1.87899e-06	2.59321e-06	4.45239e-06	2.97486e-06		142.234
NM_001083937	371	128	199	151	159.333		139	173	343	218.333				0.345013	0.536388	0.407008			0.374663	0.466307	0.924528					0.000161372	3.91925e-05	2.39037e-05	7.48227e-05		4.73236e-07	4.92651e-07	6.13777e-07	5.26555e-07		142.099
NM_138310	923	1079	1050	787	972		1606	1021	1974	1533.67				1.16901	1.13759	0.852654			1.73998	1.10618	2.13868					0.000546779	8.31211e-05	5.00766e-05	0.000226659		2.19776e-06	1.16867e-06	1.41983e-06	1.59542e-06		142.069
NM_027164	504	171	245	112	176		220	225	331	258.667				0.339286	0.486111	0.222222			0.436508	0.446429	0.656746					0.000158693	3.55189e-05	1.30512e-05	6.90877e-05		5.51352e-07	4.71649e-07	4.36001e-07	4.86334e-07		142.058
NM_053108	88	1815	3471	2962	2749.33		1442	2076	7502	3673.33				20.625	39.4432	33.6591			16.3864	23.5909	85.25					0.00964687	0.00288201	0.00197681	0.00483523		2.06976e-05	2.49237e-05	5.65959e-05	3.40724e-05		141.911
NM_019484	199	94	145	87	108.667		121	112	227	153.333				0.472362	0.728643	0.437186			0.60804	0.562814	1.1407					0.000220936	5.324e-05	2.5676e-05	9.99508e-05		7.68015e-07	5.9461e-07	7.57291e-07	7.06639e-07		141.445
NM_021463	299	156	218	155	176.333		142	237	397	258.667				0.521739	0.729097	0.518395			0.474916	0.792642	1.32776					0.000244031	5.32732e-05	3.04454e-05	0.00010925		5.99866e-07	8.37422e-07	8.81474e-07	7.72921e-07		141.347
NM_023175	257	159	146	125	143.333		191	178	338	235.667				0.618677	0.568093	0.486381			0.743191	0.692607	1.31518					0.000289372	4.15091e-05	2.85653e-05	0.000119815		9.38723e-07	7.31735e-07	8.7312e-07	8.47859e-07		141.315
NM_019963	903	1231	1061	702	998		1302	1565	2439	1768.67				1.36323	1.17497	0.777409			1.44186	1.73311	2.701					0.000637621	8.58521e-05	4.56574e-05	0.000256377		1.82121e-06	1.83102e-06	1.79314e-06	1.81512e-06		141.245
NM_001110791	620	753	1189	889	943.667		1203	793	1697	1231				1.21452	1.91774	1.43387			1.94032	1.27903	2.7371					0.000568062	0.000140124	8.42116e-05	0.000264133		2.45082e-06	1.35129e-06	1.81711e-06	1.87307e-06		141.016
NM_009098	189	2957	3511	2877	3115		3323	2871	8511	4901.67				15.6455	18.5767	15.2222			17.582	15.1905	45.0317					0.00731782	0.00135735	0.000894005	0.00318973		2.22078e-05	1.60486e-05	2.98957e-05	2.27174e-05		140.409
NM_001081274	464	3716	5887	3239	4280.67		2672	7079	8954	6235				8.00862	12.6875	6.9806			5.75862	15.2565	19.2974					0.00374585	0.000927042	0.000409973	0.00169429		7.2737e-06	1.61184e-05	1.28112e-05	1.20678e-05		140.398
NM_016802	174	2684	4915	2940	3513		4977	2533	5747	4419				15.4253	28.2471	16.8966			28.6034	14.5575	33.0287					0.00721482	0.00206394	0.000992339	0.0034237		3.6129e-05	1.53799e-05	2.19272e-05	2.44787e-05		139.865
NM_026896	292	135	175	133	147.667		121	194	364	226.333				0.462329	0.599315	0.455479			0.414384	0.664384	1.24658					0.000216244	4.37904e-05	2.67504e-05	9.55948e-05		5.23407e-07	7.01917e-07	8.27578e-07	6.84301e-07		139.697
NM_134255	280	536	673	483	564		524	714	1412	883.333				1.91429	2.40357	1.725			1.87143	2.55	5.04286					0.000895363	0.000175623	0.00010131	0.000390765		2.3638e-06	2.69406e-06	3.34786e-06	2.8019e-06		139.464
NM_001042605	260	146	275	68	163		252	158	267	225.667				0.561538	1.05769	0.261538			0.969231	0.607692	1.02692					0.000262647	7.72828e-05	1.53602e-05	0.00011843		1.22423e-06	6.42023e-07	6.81755e-07	8.49337e-07		139.438
NM_019776	891	1286	1918	1091	1431.67		1239	2157	2952	2116				1.44332	2.15264	1.22447			1.39057	2.42088	3.31313					0.000675081	0.000157288	7.19132e-05	0.000301427		1.75643e-06	2.55764e-06	2.19953e-06	2.1712e-06		138.83
NM_027246	67	94	161	88	114.333		238	58	116	137.333				1.40299	2.40299	1.31343			3.55224	0.865672	1.73134					0.000656214	0.00017558	7.71382e-05	0.000302977		4.48683e-06	9.14577e-07	1.14941e-06	2.1836e-06		138.751
NM_027481	624	238	208	210	218.667		246	269	614	376.333				0.38141	0.333333	0.336538			0.394231	0.43109	0.983974					0.000178396	2.43558e-05	1.9765e-05	7.41722e-05		4.97952e-07	4.55444e-07	6.53242e-07	5.35546e-07		138.498
NM_010358	199	233	646	288	389		217	512	655	461.333				1.17085	3.24623	1.44724			1.09045	2.57286	3.29146					0.00054764	0.000237194	8.49965e-05	0.000289943		1.37735e-06	2.71822e-06	2.18514e-06	2.09357e-06		138.493
NM_001163431	55	340	472	273	361.667		297	444	1010	583.667				6.18182	8.58182	4.96364			5.4	8.07273	18.3636					0.0028914	0.000627051	0.000291516	0.00126999		6.82073e-06	8.52879e-06	1.21913e-05	9.18026e-06		138.339
NM_175090	177	504	653	395	517.333		577	589	1313	826.333				2.84746	3.68927	2.23164			3.25989	3.32768	7.41808					0.00133183	0.000269565	0.000131065	0.000577487		4.11756e-06	3.51568e-06	4.92472e-06	4.18599e-06		137.957
NM_011750	529	734	1145	828	902.333		1191	798	1696	1228.33				1.38752	2.16446	1.56522			2.25142	1.50851	3.20605					0.000648982	0.000158151	9.19256e-05	0.000299686		2.84376e-06	1.59373e-06	2.12844e-06	2.18864e-06		136.928
NM_001001892	350	14491	8569	9568	10876		18529	11651	34012	21397.3				41.4029	24.4829	27.3371			52.94	33.2886	97.1771					0.0193652	0.0017889	0.00160552	0.00758655		6.68684e-05	3.51692e-05	6.45141e-05	5.55172e-05		136.652
NM_011852	348	1129	892	526	849		1791	1061	1799	1550.33				3.24425	2.56322	1.51149			5.14655	3.04885	5.16954					0.00151742	0.000187288	8.87704e-05	0.000597827		6.5006e-06	3.22109e-06	3.43196e-06	4.38455e-06		136.349
NM_027013	167	142	197	141	160		132	166	472	256.667				0.850299	1.17964	0.844311			0.790419	0.994012	2.82635					0.000397708	8.61932e-05	4.95866e-05	0.000177829		9.98377e-07	1.05017e-06	1.87636e-06	1.3083e-06		135.924
NM_007471	676	8902	8323	6391	7872		10470	9610	21928	14002.7				13.1686	12.3121	9.45414			15.4882	14.216	32.4379					0.00615933	0.000899615	0.000555244	0.00253806		1.95631e-05	1.50191e-05	2.15349e-05	1.87057e-05		135.684
NM_023719	377	3508	4333	3568	3803		4811	3863	8780	5818				9.30504	11.4934	9.46419			12.7613	10.2467	23.2891					0.00435222	0.00083979	0.000555834	0.00191595		1.61187e-05	1.08256e-05	1.54612e-05	1.41352e-05		135.545
NM_001039186	439	188	183	83	151.333		231	259	330	273.333				0.428246	0.416856	0.189066			0.526196	0.589977	0.751708					0.000200302	3.04586e-05	1.11039e-05	8.06216e-05		6.64637e-07	6.23307e-07	4.99045e-07	5.95663e-07		135.348
NM_001037746	299	191	221	181	197.667		221	238	495	318				0.638796	0.73913	0.605351			0.73913	0.795987	1.65552					0.000298782	5.40063e-05	3.55524e-05	0.000129447		9.33594e-07	8.40955e-07	1.09907e-06	9.57872e-07		135.14
NM_001110832	328	392	460	457	436.333		409	501	1145	685				1.19512	1.40244	1.39329			1.24695	1.52744	3.49085					0.000558991	0.000102473	8.18284e-05	0.000247764		1.57502e-06	1.61373e-06	2.31751e-06	1.83542e-06		134.99
NM_010913	299	389	452	443	428		407	497	1127	677				1.301	1.51171	1.48161			1.3612	1.66221	3.76923					0.000608514	0.000110456	8.70151e-05	0.000268662		1.71933e-06	1.75611e-06	2.50232e-06	1.99259e-06		134.831
NM_028071	123	2222	3508	2451	2727		3985	1911	5493	3796.33				18.065	28.5203	19.9268			32.3984	15.5366	44.6585					0.0084495	0.00208391	0.00117031	0.00390124		4.09223e-05	1.64143e-05	2.9648e-05	2.89949e-05		134.549
NM_007806	173	2778	2793	2074	2548.33		3209	2436	8224	4623				16.0578	16.1445	11.9884			18.5491	14.0809	47.5376					0.00751067	0.00117964	0.000704084	0.00313146		2.34294e-05	1.48764e-05	3.15593e-05	2.32884e-05		134.465
NM_001025606	303	272	233	207	237.333		330	301	654	428.333				0.89769	0.768977	0.683168			1.08911	0.993399	2.15842					0.000419874	5.61871e-05	4.01226e-05	0.000172061		1.37565e-06	1.04952e-06	1.43293e-06	1.28603e-06		133.792
NM_001164177	132	150	175	131	152		167	183	413	254.333				1.13636	1.32576	0.992424			1.26515	1.38636	3.12879					0.000531508	9.68696e-05	5.82853e-05	0.000228888		1.59801e-06	1.46468e-06	2.07714e-06	1.71328e-06		133.596
NM_001146176	132	230	203	194	209		215	358	531	368				1.74242	1.53788	1.4697			1.62879	2.71212	4.02273					0.000814979	0.000112369	8.63157e-05	0.000337888		2.05732e-06	2.86534e-06	2.67061e-06	2.53109e-06		133.495
NM_001163300	918	502	501	367	456.667		842	458	979	759.667				0.546841	0.545752	0.399782			0.917211	0.498911	1.06645					0.000255772	3.98766e-05	2.34793e-05	0.000106376		1.15853e-06	5.27096e-07	7.07995e-07	7.97873e-07		133.325
NM_001142655	126	364	370	321	351.667		328	447	1112	629				2.88889	2.93651	2.54762			2.60317	3.54762	8.8254					0.00135121	0.000214563	0.000149622	0.000571799		3.28807e-06	3.74804e-06	5.85901e-06	4.29837e-06		133.027
NM_026031	234	458	496	299	417.667		546	490	1219	751.667				1.95726	2.11966	1.27778			2.33333	2.09402	5.2094					0.000915465	0.000154878	7.50442e-05	0.000381796		2.94723e-06	2.21232e-06	3.45842e-06	2.87266e-06		132.907
NM_023422	107	8108	22359	18454	16307		3432	18193	38366	19997				75.7757	208.963	172.467			32.0748	170.028	358.561					0.0354423	0.0152683	0.010129	0.0202799		4.05136e-05	0.000179634	0.000238042	0.00015273		132.783
NM_001039368	80	277	292	199	256		274	296	853	474.333				3.4625	3.65	2.4875			3.425	3.7	10.6625					0.0016195	0.000266696	0.000146092	0.000677431		4.32611e-06	3.90903e-06	7.07863e-06	5.10459e-06		132.71
NM_001040683	730	704	882	694	760		894	790	1976	1220				0.964384	1.20822	0.950685			1.22466	1.08219	2.70685					0.000451068	8.82814e-05	5.5834e-05	0.000198394		1.54686e-06	1.14333e-06	1.79703e-06	1.49574e-06		132.64
NM_026948	135	227	191	182	200		345	163	574	360.667				1.68148	1.41481	1.34815			2.55556	1.20741	4.25185					0.000786474	0.000103377	7.91771e-05	0.000323009		3.22792e-06	1.27562e-06	2.82272e-06	2.44209e-06		132.268
NM_001205188	348	436	595	467	499.333		299	877	1166	780.667				1.25287	1.70977	1.34195			0.859195	2.52011	3.35057					0.000586003	0.000124928	7.88133e-05	0.000263248		1.08525e-06	2.66249e-06	2.22438e-06	1.99071e-06		132.239
NM_025301	157	234	340	209	261		242	229	845	438.667				1.49045	2.16561	1.33121			1.5414	1.4586	5.38217					0.000697122	0.000158235	7.81823e-05	0.00031118		1.94694e-06	1.541e-06	3.57312e-06	2.35369e-06		132.209
NM_033609	770	715	910	712	779		923	805	2008	1245.33				0.928571	1.18182	0.924675			1.1987	1.04545	2.60779					0.000434318	8.63523e-05	5.43064e-05	0.000191659		1.51408e-06	1.10452e-06	1.73126e-06	1.44995e-06		132.183
NM_026435	66	185	399	244	276		148	391	580	373				2.80303	6.04545	3.69697			2.24242	5.92424	8.78788					0.00131105	0.000441725	0.000217124	0.000656634		2.8324e-06	6.25893e-06	5.83411e-06	4.97514e-06		131.983
NM_023716	426	1222	1706	1200	1376		1158	2025	3333	2172				2.86854	4.00469	2.8169			2.71831	4.75352	7.82394					0.0013417	0.000292613	0.000165437	0.000599915		3.43349e-06	5.02207e-06	5.19417e-06	4.54991e-06		131.852
NM_007645	262	1365	1352	1485	1400.67		1846	1533	3474	2284.33				5.20992	5.16031	5.66794			7.0458	5.85115	13.2595					0.00243682	0.00037705	0.000332879	0.00104892		8.89954e-06	6.1817e-06	8.80276e-06	7.96133e-06		131.751
NM_009280	399	266	312	263	280.333		202	363	900	488.333				0.666667	0.781955	0.659148			0.506266	0.909774	2.25564					0.000311818	5.71354e-05	3.87119e-05	0.000135888		6.39463e-07	9.61171e-07	1.49748e-06	1.0327e-06		131.585
NM_027016	379	600	679	462	580.333		864	684	1362	970				1.58311	1.79156	1.219			2.27968	1.80475	3.59367					0.000740465	0.000130904	7.1592e-05	0.00031432		2.87946e-06	1.90671e-06	2.38577e-06	2.39065e-06		131.479
NM_178196	107	8133	22367	18499	16333		3258	18514	39100	20290.7				76.0093	209.037	172.888			30.4486	173.028	365.421					0.0355516	0.0152738	0.0101537	0.0203264		3.84596e-05	0.000182803	0.000242596	0.000154619		131.461
NM_001177648	597	1324	1359	1005	1229.33		2158	1383	2604	2048.33				2.21776	2.27638	1.68342			3.61474	2.31658	4.36181					0.0010373	0.000166329	9.88675e-05	0.000434167		4.56577e-06	2.44746e-06	2.89572e-06	3.30298e-06		131.447
NM_024170	94	126	178	191	165		111	174	465	250				1.34043	1.89362	2.03191			1.18085	1.85106	4.94681					0.000626953	0.000138362	0.000119335	0.000294883		1.49153e-06	1.95564e-06	3.28409e-06	2.24375e-06		131.424
NM_001018063	94	126	178	191	165		111	174	465	250				1.34043	1.89362	2.03191			1.18085	1.85106	4.94681					0.000626953	0.000138362	0.000119335	0.000294883		1.49153e-06	1.95564e-06	3.28409e-06	2.24375e-06		131.424
NM_138585	919	414	588	458	486.667		520	543	1168	743.667				0.45049	0.639826	0.498368			0.565832	0.59086	1.27095					0.000210706	4.67504e-05	2.92693e-05	9.55753e-05		7.14702e-07	6.2424e-07	8.43757e-07	7.27566e-07		131.363
NM_078484	374	121	197	148	155.333		139	181	362	227.333				0.323529	0.526738	0.395722			0.371658	0.483957	0.967914					0.000151323	3.84874e-05	2.32408e-05	7.10172e-05		4.6944e-07	5.11298e-07	6.4258e-07	5.41106e-07		131.245
NM_025970	148	171	233	184	196		137	228	614	326.333				1.15541	1.57432	1.24324			0.925676	1.54054	4.14865					0.000540414	0.000115032	7.3016e-05	0.000242821		1.16922e-06	1.62757e-06	2.75421e-06	1.85033e-06		131.231
NM_001009935	378	3529	4361	3581	3823.67		4968	4027	9184	6059.67				9.33598	11.537	9.47354			13.1429	10.6534	24.2963					0.00436669	0.000842981	0.000556384	0.00192202		1.66007e-05	1.12553e-05	1.61299e-05	1.4662e-05		131.089
NM_199035	507	480	528	370	459.333		549	822	931	767.333				0.946746	1.04142	0.729783			1.08284	1.6213	1.83629					0.000442818	7.60938e-05	4.28603e-05	0.000187257		1.36773e-06	1.7129e-06	1.21908e-06	1.43324e-06		130.654
NM_027342	136	165	293	129	195.667		174	230	527	310.333				1.21324	2.15441	0.948529			1.27941	1.69118	3.875					0.000567463	0.000157417	5.57074e-05	0.000260196		1.61602e-06	1.78672e-06	2.57254e-06	1.99176e-06		130.636
NM_008749	436	1347	1614	1187	1382.67		1758	1588	3559	2301.67				3.08945	3.70183	2.72248			4.03211	3.6422	8.16284					0.00144502	0.000270483	0.000159892	0.000625131		5.09295e-06	3.84796e-06	5.41916e-06	4.78669e-06		130.598
NM_001130485	91	1427	2268	1220	1638.33		1755	2000	3916	2557				15.6813	24.9231	13.4066			19.2857	21.978	43.033					0.00733457	0.00182106	0.000787373	0.00331434		2.43598e-05	2.32196e-05	2.85688e-05	2.53827e-05		130.575
NM_001130484	91	1427	2268	1220	1638.33		1755	2000	3916	2557				15.6813	24.9231	13.4066			19.2857	21.978	43.033					0.00733457	0.00182106	0.000787373	0.00331434		2.43598e-05	2.32196e-05	2.85688e-05	2.53827e-05		130.575
NM_021338	91	1427	2268	1220	1638.33		1755	2000	3916	2557				15.6813	24.9231	13.4066			19.2857	21.978	43.033					0.00733457	0.00182106	0.000787373	0.00331434		2.43598e-05	2.32196e-05	2.85688e-05	2.53827e-05		130.575
NM_172659	478	276	299	171	248.667		447	333	477	419				0.577406	0.625523	0.357741			0.935146	0.696653	0.997908					0.000270068	4.57053e-05	2.10102e-05	0.000112261		1.18118e-06	7.36009e-07	6.62492e-07	8.59894e-07		130.552
NM_021548	93	350	340	288	326		321	434	1070	608.333				3.76344	3.65591	3.09677			3.45161	4.66667	11.5054					0.00176026	0.000267128	0.000181874	0.000736422		4.35973e-06	4.9303e-06	7.6382e-06	5.64274e-06		130.508
NM_010708	334	1266	1533	852	1217		2338	1536	1832	1902				3.79042	4.58982	2.5509			7	4.5988	5.48503					0.00177288	0.000335366	0.000149815	0.000752687		8.84169e-06	4.85861e-06	3.64141e-06	5.78057e-06		130.21
NM_028177	137	402	714	483	533		528	561	1210	766.333				2.93431	5.21168	3.52555			3.85401	4.09489	8.83212					0.00137245	0.000380804	0.000207056	0.000653438		4.868e-06	4.32623e-06	5.86347e-06	5.01923e-06		130.187
NM_001037178	433	103	162	81	115.333		178	96	258	177.333				0.237875	0.374134	0.187067			0.411085	0.221709	0.595843					0.000111261	2.7337e-05	1.09865e-05	4.98614e-05		5.19241e-07	2.34234e-07	3.95569e-07	3.83015e-07		130.181
NM_023554	235	528	419	358	435		485	688	1443	872				2.24681	1.78298	1.5234			2.06383	2.92766	6.14043					0.00105089	0.000130278	8.94699e-05	0.000423547		2.60682e-06	3.09305e-06	4.07651e-06	3.2588e-06		129.97
NM_001002239	165	2845	3474	2388	2902.33		1871	3096	11506	5491				17.2424	21.0545	14.4727			11.3394	18.7636	69.7333					0.00806474	0.0015384	0.000849987	0.00348438		1.43228e-05	1.98237e-05	4.62946e-05	2.68137e-05		129.948
NM_138660	679	191	202	170	187.667		174	310	499	327.667				0.281296	0.297496	0.250368			0.256259	0.456554	0.734904					0.00013157	2.17373e-05	1.47042e-05	5.60037e-05		3.23681e-07	4.82346e-07	4.87889e-07	4.31305e-07		129.847
NM_020582	69	782	1248	1025	1018.33		532	1131	3194	1619				11.3333	18.087	14.8551			7.71014	16.3913	46.2899					0.0053009	0.00132157	0.000872442	0.0024983		9.73867e-06	1.73173e-05	3.0731e-05	1.92623e-05		129.699
NM_009763	292	146	105	88	113		116	183	431	243.333				0.5	0.359589	0.30137			0.39726	0.626712	1.47603					0.000233863	2.62742e-05	1.76995e-05	9.26124e-05		5.01779e-07	6.62118e-07	9.79907e-07	7.14601e-07		129.6
NM_153510	283	776	626	294	565.333		1083	820	1589	1164				2.74205	2.21201	1.03887			3.82686	2.89753	5.61484					0.00128253	0.000161626	6.10131e-05	0.000501723		4.83369e-06	3.06122e-06	3.72759e-06	3.87417e-06		129.505
NM_001163662	440	1369	1646	1222	1412.33		1846	1602	3638	2362				3.11136	3.74091	2.77727			4.19545	3.64091	8.26818					0.00145527	0.000273338	0.00016311	0.000630572		5.29927e-06	3.8466e-06	5.48909e-06	4.87832e-06		129.26
NM_025297	354	173	181	145	166.333		194	193	521	302.667				0.488701	0.511299	0.409605			0.548023	0.545198	1.47175					0.000228578	3.73593e-05	2.40562e-05	9.66646e-05		6.92206e-07	5.75998e-07	9.77068e-07	7.48424e-07		129.158
NM_008558	141	230	212	205	215.667		228	363	565	385.333				1.63121	1.50355	1.4539			1.61702	2.57447	4.00709					0.000762959	0.00010986	8.5388e-05	0.000319402		2.04246e-06	2.71991e-06	2.66023e-06	2.4742e-06		129.093
NM_001177649	532	1317	1372	1003	1230.67		2125	1446	2705	2092				2.47556	2.57895	1.88534			3.99436	2.71805	5.08459					0.00115789	0.000188437	0.000110726	0.000485684		5.04527e-06	2.8716e-06	3.37556e-06	3.76414e-06		129.029
NM_007620	258	155	205	184	181.333		165	199	517	293.667				0.600775	0.794574	0.713178			0.639535	0.771318	2.00388					0.000280999	5.80574e-05	4.18851e-05	0.00012698		8.07795e-07	8.14893e-07	1.33034e-06	9.84341e-07		129
NM_023536	219	292	292	228	270.667		238	313	1051	534				1.33333	1.33333	1.0411			1.08676	1.42922	4.79909					0.000623636	9.74232e-05	6.11438e-05	0.000260734		1.37268e-06	1.50997e-06	3.18602e-06	2.02289e-06		128.892
NM_001012236	295	758	867	604	743		1375	863	1310	1182.67				2.56949	2.93898	2.04746			4.66102	2.92542	4.44068					0.00120182	0.000214744	0.000120248	0.000512271		5.88732e-06	3.09069e-06	2.94808e-06	3.97537e-06		128.861
NM_011637	295	758	867	604	743		1375	863	1310	1182.67				2.56949	2.93898	2.04746			4.66102	2.92542	4.44068					0.00120182	0.000214744	0.000120248	0.000512271		5.88732e-06	3.09069e-06	2.94808e-06	3.97537e-06		128.861
NM_001081108	80	240	307	206	251		327	199	778	434.667				3	3.8375	2.575			4.0875	2.4875	9.725					0.00140318	0.000280396	0.00015123	0.000611602		5.16291e-06	2.62803e-06	6.45624e-06	4.74906e-06		128.784
NM_016737	524	1636	1655	1261	1517.33		1280	2037	5562	2959.67				3.12214	3.1584	2.40649			2.44275	3.8874	10.6145					0.00146031	0.000230776	0.000141334	0.000610806		3.08543e-06	4.10702e-06	7.04677e-06	4.74641e-06		128.688
NM_001025577	351	975	909	549	811		1454	1088	1997	1513				2.77778	2.58974	1.5641			4.14245	3.09972	5.68946					0.00129924	0.000189226	9.18601e-05	0.000526776		5.23232e-06	3.27483e-06	3.77712e-06	4.09476e-06		128.646
NM_026703	153	369	447	363	393		364	524	1128	672				2.41176	2.92157	2.37255			2.37908	3.42484	7.37255					0.00112805	0.000213471	0.00013934	0.00049362		3.00502e-06	3.61832e-06	4.8945e-06	3.83928e-06		128.571
NM_001252477	235	457	509	386	450.667		827	476	878	727				1.94468	2.16596	1.64255			3.51915	2.02553	3.73617					0.000909579	0.000158261	9.64676e-05	0.000388103		4.44503e-06	2.13996e-06	2.48037e-06	3.02179e-06		128.435
NM_009224	429	638	695	531	621.333		1093	646	1360	1033				1.48718	1.62005	1.23776			2.54779	1.50583	3.17016					0.000695594	0.000118373	7.26941e-05	0.000295553		3.2181e-06	1.5909e-06	2.10461e-06	2.30454e-06		128.248
NM_001038700	531	1321	1384	1017	1240.67		2186	1453	2708	2115.67				2.48776	2.6064	1.91525			4.11676	2.73635	5.09981					0.00116359	0.000190443	0.000112483	0.000488839		5.19987e-06	2.89093e-06	3.38567e-06	3.82549e-06		127.785
NM_023133	126	2404	2950	2309	2554.33		3910	2054	6693	4219				19.0794	23.4127	18.3254			31.0317	16.3016	53.119					0.00892393	0.0017107	0.00107626	0.00390363		3.91961e-05	1.72225e-05	3.52647e-05	3.05611e-05		127.732
NM_001177650	503	1169	1150	884	1067.67		1885	1279	2443	1869				2.32406	2.28628	1.75746			3.74751	2.54274	4.85686					0.00108702	0.000167053	0.000103216	0.000452431		4.73348e-06	2.68639e-06	3.22438e-06	3.54808e-06		127.514
NM_174996	114	99	108	111	106		117	85	360	187.333				0.868421	0.947368	0.973684			1.02632	0.745614	3.15789					0.000406184	6.92217e-05	5.71847e-05	0.00017753		1.29634e-06	7.87737e-07	2.09647e-06	1.39351e-06		127.397
NM_001164472	114	122	141	122	128.333		79	150	494	241				1.07018	1.23684	1.07018			0.692982	1.31579	4.33333					0.00050055	9.03728e-05	6.28517e-05	0.000217925		8.75305e-07	1.39012e-06	2.87682e-06	1.71408e-06		127.138
NM_023065	229	627	1026	565	739.333		629	955	2043	1209				2.73799	4.48035	2.46725			2.74672	4.17031	8.9214					0.00128063	0.000327367	0.000144902	0.000584301		3.46938e-06	4.4059e-06	5.92275e-06	4.59934e-06		127.04
NM_001171036	218	3557	5016	4098	4223.67		4858	5373	9208	6479.67				16.3165	23.0092	18.7982			22.2844	24.6468	42.2385					0.00763167	0.00168122	0.00110402	0.0034723		2.81474e-05	2.60392e-05	2.80414e-05	2.74093e-05		126.683
NM_001171035	218	3557	5016	4098	4223.67		4858	5373	9208	6479.67				16.3165	23.0092	18.7982			22.2844	24.6468	42.2385					0.00763167	0.00168122	0.00110402	0.0034723		2.81474e-05	2.60392e-05	2.80414e-05	2.74093e-05		126.683
NM_001171034	218	3557	5016	4098	4223.67		4858	5373	9208	6479.67				16.3165	23.0092	18.7982			22.2844	24.6468	42.2385					0.00763167	0.00168122	0.00110402	0.0034723		2.81474e-05	2.60392e-05	2.80414e-05	2.74093e-05		126.683
NM_026669	218	3557	5016	4098	4223.67		4858	5373	9208	6479.67				16.3165	23.0092	18.7982			22.2844	24.6468	42.2385					0.00763167	0.00168122	0.00110402	0.0034723		2.81474e-05	2.60392e-05	2.80414e-05	2.74093e-05		126.683
NM_053076	218	1437	1967	1316	1573.33		1522	2206	4216	2648				6.59174	9.02294	6.0367			6.98165	10.1193	19.3394					0.00308314	0.000659282	0.000354537	0.00136565		8.81851e-06	1.06909e-05	1.28391e-05	1.07828e-05		126.65
NM_181070	187	334	603	349	428.667		498	548	807	617.667				1.7861	3.2246	1.86631			2.6631	2.93048	4.31551					0.000835405	0.000235613	0.000109609	0.000393542		3.36376e-06	3.09604e-06	2.86498e-06	3.10826e-06		126.612
NM_025431	111	314	312	168	264.667		517	178	871	522				2.82883	2.81081	1.51351			4.65766	1.6036	7.84685					0.00132312	0.000205379	8.8889e-05	0.000539129		5.88308e-06	1.6942e-06	5.20937e-06	4.26222e-06		126.49
NM_177614	598	1743	1754	1219	1572		2116	2132	4683	2977				2.91472	2.93311	2.03846			3.53846	3.56522	7.8311					0.00136329	0.000214315	0.000119719	0.000565775		4.46942e-06	3.76663e-06	5.19892e-06	4.47833e-06		126.336
NM_010015	94	605	869	644	706		906	675	1785	1122				6.43617	9.24468	6.85106			9.6383	7.18085	18.9894					0.00301037	0.000675484	0.000402365	0.00136274		1.21741e-05	7.58653e-06	1.26067e-05	1.07891e-05		126.307
NM_016859	417	149	145	114	136		231	148	364	247.667				0.357314	0.347722	0.273381			0.553957	0.354916	0.872902					0.000167125	2.54071e-05	1.60558e-05	6.95294e-05		6.99702e-07	3.74967e-07	5.79503e-07	5.5139e-07		126.098
NM_001003933	926	1433	1920	1286	1546.33		1492	2217	4220	2643				1.54752	2.07343	1.38877			1.61123	2.39417	4.55724					0.000723815	0.0001515	8.15627e-05	0.000318959		2.03514e-06	2.52942e-06	3.02546e-06	2.53001e-06		126.07
NM_025774	167	144	132	116	130.667		225	92	427	248				0.862275	0.790419	0.694611			1.34731	0.550898	2.55689					0.000403309	5.77538e-05	4.07947e-05	0.000167286		1.70178e-06	5.82021e-07	1.69747e-06	1.32709e-06		126.055
NM_001003934	945	1433	1920	1286	1546.33		1492	2219	4220	2643.67				1.5164	2.03175	1.36085			1.57884	2.34815	4.46561					0.000709262	0.000148454	7.99229e-05	0.000312546		1.99423e-06	2.4808e-06	2.96463e-06	2.47989e-06		126.032
NM_009077	169	1691	2460	1806	1985.67		2460	1788	5370	3206				10.0059	14.5562	10.6864			14.5562	10.5799	31.7751					0.00468004	0.00106358	0.000627614	0.00212374		1.83859e-05	1.11776e-05	2.10949e-05	1.68861e-05		125.769
NM_001128601	184	119	236	190	181.667		122	207	448	259				0.646739	1.28261	1.03261			0.663043	1.125	2.43478					0.000302497	9.37168e-05	6.06454e-05	0.000152286		8.37489e-07	1.18856e-06	1.61641e-06	1.21415e-06		125.426
NM_008147	284	5377	4078	3195	4216.67		7351	5869	12711	8643.67				18.9331	14.3592	11.25			25.8838	20.6655	44.757					0.00885552	0.00104919	0.000660715	0.00352181		3.26938e-05	2.1833e-05	2.97134e-05	2.808e-05		125.42
NM_001161369	368	266	312	256	278		212	381	940	511				0.722826	0.847826	0.695652			0.576087	1.03533	2.55435					0.000338085	6.19484e-05	4.08558e-05	0.000146963		7.27654e-07	1.09382e-06	1.69578e-06	1.17242e-06		125.35
NM_013585	200	181	218	211	203.333		188	230	635	351				0.905	1.09	1.055			0.94	1.15	3.175					0.000423293	7.96434e-05	6.19604e-05	0.000188299		1.18731e-06	1.21497e-06	2.10782e-06	1.50337e-06		125.251
NM_028728	205	1080	1443	1034	1185.67		883	2019	3194	2032				5.26829	7.03902	5.0439			4.30732	9.84878	15.5805					0.00246412	0.000514323	0.00029623	0.00109156		5.44057e-06	1.04052e-05	1.03436e-05	8.72978e-06		125.038
NM_008633	1106	1396	1901	1179	1492		1543	2119	4066	2576				1.26221	1.71881	1.066			1.39512	1.91591	3.67631					0.000590368	0.000125589	6.26067e-05	0.000259521		1.76217e-06	2.02415e-06	2.44063e-06	2.07565e-06		125.031
NM_019929	91	177	190	103	156.667		401	112	297	270				1.94505	2.08791	1.13187			4.40659	1.23077	3.26374					0.000909754	0.000152558	6.64749e-05	0.000376263		5.56596e-06	1.3003e-06	2.16673e-06	3.011e-06		124.963
NM_010442	270	6419	19296	12694	12803		5708	15378	26843	15976.3				23.7741	71.4667	47.0148			21.1407	56.9556	99.4185					0.0111198	0.00522188	0.00276119	0.00636762		2.67028e-05	6.01732e-05	6.60021e-05	5.09594e-05		124.955
NM_009742	153	245	503	242	330		339	401	717	485.667				1.60131	3.28758	1.5817			2.21569	2.62092	4.68627					0.000748974	0.000240215	9.28936e-05	0.000360694		2.79863e-06	2.76898e-06	3.11113e-06	2.89291e-06		124.682
NM_183316	83	185	175	148	169.333		257	143	589	329.667				2.22892	2.10843	1.78313			3.09639	1.72289	7.09639					0.00104252	0.000154058	0.000104724	0.000433768		3.91104e-06	1.82022e-06	4.71116e-06	3.48081e-06		124.617
NM_016755	89	792	1037	871	900		612	1610	2288	1503.33				8.89888	11.6517	9.78652			6.8764	18.0899	25.7079					0.00416224	0.000851358	0.000574765	0.00186279		8.68558e-06	1.91119e-05	1.7067e-05	1.49548e-05		124.561
NM_001039129	354	2323	4009	2861	3064.33		3072	2508	8881	4820.33				6.56215	11.3249	8.08192			8.67797	7.08475	25.0876					0.00306929	0.000827478	0.000474653	0.00145714		1.09611e-05	7.48499e-06	1.66552e-05	1.17004e-05		124.537
NM_001035122	374	215	180	117	170.667		263	244	570	359				0.574866	0.481283	0.312834			0.703209	0.652406	1.52406					0.00026888	3.51661e-05	1.83728e-05	0.000107473		8.88222e-07	6.89263e-07	1.0118e-06	8.63094e-07		124.521
NM_027307	374	215	180	117	170.667		263	244	570	359				0.574866	0.481283	0.312834			0.703209	0.652406	1.52406					0.00026888	3.51661e-05	1.83728e-05	0.000107473		8.88222e-07	6.89263e-07	1.0118e-06	8.63094e-07		124.521
NM_019735	222	162	249	249	220		138	237	675	350				0.72973	1.12162	1.12162			0.621622	1.06757	3.04054					0.000341314	8.19539e-05	6.58731e-05	0.000163047		7.85169e-07	1.12788e-06	2.01856e-06	1.31054e-06		124.413
NM_011309	75	179	232	190	200.333		365	137	446	316				2.38667	3.09333	2.53333			4.86667	1.82667	5.94667					0.00111631	0.000226022	0.000148783	0.000497038		6.14708e-06	1.92986e-06	3.94788e-06	4.00827e-06		124.003
NM_178183	111	4010	9124	8959	7364.33		2988	8134	18715	9945.67				36.1261	82.1982	80.7117			26.9189	73.2793	168.604					0.0168972	0.00600601	0.00474022	0.00921446		3.40012e-05	7.74191e-05	0.000111933	7.4451e-05		123.765
NM_010545	196	142	267	69	159.333		284	166	291	247				0.72449	1.36224	0.352041			1.44898	0.846939	1.48469					0.000338863	9.95356e-05	2.06754e-05	0.000153025		1.8302e-06	8.94786e-07	9.8566e-07	1.23688e-06		123.718
NM_153151	378	122	131	113	122		148	171	339	219.333				0.322751	0.346561	0.298942			0.391534	0.452381	0.896825					0.000150959	2.53223e-05	1.75569e-05	6.46129e-05		4.94546e-07	4.77938e-07	5.95385e-07	5.22623e-07		123.632
NM_153138	474	675	881	680	745.333		1120	711	1860	1230.33				1.42405	1.85865	1.4346			2.36287	1.5	3.92405					0.000666067	0.000135807	8.42544e-05	0.000295376		2.98454e-06	1.58474e-06	2.6051e-06	2.39146e-06		123.513
NM_025380	155	193	246	160	199.667		172	272	676	373.333				1.24516	1.5871	1.03226			1.10968	1.75484	4.36129					0.000582395	0.000115965	6.06248e-05	0.000252995		1.40163e-06	1.85398e-06	2.89538e-06	2.05033e-06		123.392
NM_001012309	523	124	167	137	142.667		174	156	376	235.333				0.237094	0.319312	0.26195			0.332696	0.298279	0.718929					0.000110895	2.33313e-05	1.53844e-05	4.98703e-05		4.20228e-07	3.1513e-07	4.77283e-07	4.04214e-07		123.376
NM_001253874	1142	682	424	178	428		1358	858	470	895.333				0.597198	0.371278	0.155867			1.18914	0.751313	0.411559					0.000279325	2.71283e-05	9.1541e-06	0.000105203		1.502e-06	7.93758e-07	2.73226e-07	8.56329e-07		122.853
NM_026086	229	120	99	86	101.667		176	135	290	200.333				0.524017	0.432314	0.375546			0.768559	0.58952	1.26638					0.000245097	3.15881e-05	2.20559e-05	9.95803e-05		9.70766e-07	6.22824e-07	8.40723e-07	8.11437e-07		122.721
NM_027558	198	121	156	95	124		178	141	340	219.667				0.611111	0.787879	0.479798			0.89899	0.712121	1.71717					0.000285833	5.75682e-05	2.81787e-05	0.00012386		1.13551e-06	7.52352e-07	1.14e-06	1.00929e-06		122.72
NM_146234	112	94	129	80	101		60	181	311	184				0.839286	1.15179	0.714286			0.535714	1.61607	2.77679					0.000392556	8.4158e-05	4.19502e-05	0.000172888		6.7666e-07	1.70737e-06	1.84346e-06	1.40916e-06		122.689
NM_010447	301	2319	4027	2862	3069.33		3115	2540	9051	4902				7.70432	13.3787	9.50831			10.3488	8.43854	30.0698					0.00360352	0.000977549	0.000558425	0.00171316		1.30716e-05	8.91526e-06	1.99627e-05	1.39832e-05		122.516
NM_001253872	1143	682	425	181	429.333		1366	859	470	898.333				0.596675	0.371829	0.158355			1.1951	0.751531	0.411199					0.000279081	2.71685e-05	9.30024e-06	0.000105183		1.50953e-06	7.93988e-07	2.72987e-07	8.58835e-07		122.472
NM_145426	330	379	516	382	425.667		666	485	882	677.667				1.14848	1.56364	1.15758			2.01818	1.4697	2.67273					0.000537177	0.000114251	6.79847e-05	0.000239804		2.54916e-06	1.55273e-06	1.77437e-06	1.95875e-06		122.427
NM_180599	330	379	516	382	425.667		666	485	882	677.667				1.14848	1.56364	1.15758			2.01818	1.4697	2.67273					0.000537177	0.000114251	6.79847e-05	0.000239804		2.54916e-06	1.55273e-06	1.77437e-06	1.95875e-06		122.427
NM_181282	226	253	261	284	266		317	301	815	477.667				1.11947	1.15487	1.25664			1.40265	1.33186	3.60619					0.000523606	8.43831e-05	7.38026e-05	0.000227264		1.77169e-06	1.4071e-06	2.39408e-06	1.85763e-06		122.341
NM_020329	219	142	118	119	126.333		158	209	377	248				0.648402	0.538813	0.543379			0.721461	0.954338	1.72146					0.000303275	3.93696e-05	3.19128e-05	0.000124852		9.11276e-07	1.00825e-06	1.14285e-06	1.02079e-06		122.309
NM_026826	124	333	520	331	394.667		358	461	1215	678				2.68548	4.19355	2.66935			2.8871	3.71774	9.79839					0.00125607	0.000306412	0.000156772	0.000573085		3.64669e-06	3.92777e-06	6.50496e-06	4.69314e-06		122.111
NM_001252316	482	470	471	445	462		815	501	1119	811.667				0.975104	0.977178	0.923237			1.69087	1.03942	2.32158					0.000456082	7.13999e-05	5.42219e-05	0.000193901		2.13574e-06	1.09814e-06	1.54125e-06	1.59171e-06		121.82
NM_001123371	286	1341	1622	930	1297.67		1523	1616	4429	2522.67				4.68881	5.67133	3.25175			5.32517	5.65035	15.486					0.00219308	0.000414389	0.000190976	0.000932816		6.72622e-06	5.96956e-06	1.02809e-05	7.65888e-06		121.795
NM_013647	127	1389	2408	1779	1858.67		2170	1261	5375	2935.33				10.937	18.9606	14.0079			17.0866	9.92913	42.3228					0.00511553	0.0013854	0.000822686	0.00244121		2.15821e-05	1.04901e-05	2.80973e-05	2.00565e-05		121.717
NM_001267808	335	13725	9024	9835	10861.3		18395	17250	32303	22649.3				40.9701	26.9373	29.3582			54.9104	51.4925	96.4269					0.0191628	0.00196824	0.00172422	0.00761843		6.93573e-05	5.44016e-05	6.4016e-05	6.25916e-05		121.716
NM_001205332	1067	1361	1837	1136	1444.67		1534	2158	4015	2569				1.27554	1.72165	1.06467			1.43768	2.02249	3.76289					0.000596604	0.000125796	6.25282e-05	0.000261643		1.81593e-06	2.13675e-06	2.49811e-06	2.15026e-06		121.679
NM_009778	1644	1129	213	210	517.333		2461	590	1262	1437.67				0.68674	0.129562	0.127737			1.49696	0.358881	0.76764					0.000321207	9.46676e-06	7.50204e-06	0.000112725		1.89081e-06	3.79155e-07	5.09622e-07	9.26528e-07		121.664
NM_001143755	375	111	172	79	120.667		173	162	269	201.333				0.296	0.458667	0.210667			0.461333	0.432	0.717333					0.000138447	3.35136e-05	1.23725e-05	6.14444e-05		5.82709e-07	4.56405e-07	4.76224e-07	5.05113e-07		121.645
NM_001205330	1106	1400	1908	1178	1495.33		1581	2228	4141	2650				1.26582	1.72514	1.0651			1.42948	2.01447	3.74412					0.000592059	0.000126051	6.25536e-05	0.000260221		1.80557e-06	2.12827e-06	2.48565e-06	2.13983e-06		121.608
NM_011890	301	168	185	122	158.333		178	204	567	316.333				0.55814	0.614618	0.405316			0.591362	0.677741	1.88372					0.000261057	4.49085e-05	2.38043e-05	0.000109923		7.46949e-07	7.16029e-07	1.25057e-06	9.04515e-07		121.527
NM_010899	908	245	347	223	271.667		390	332	630	450.667				0.269824	0.382159	0.245595			0.429515	0.365639	0.693833					0.000126204	2.79233e-05	1.44238e-05	5.61837e-05		5.4252e-07	3.86295e-07	4.60622e-07	4.63146e-07		121.309
NM_172574	183	576	662	382	540		411	1122	1659	1064				3.14754	3.61749	2.08743			2.2459	6.13115	9.06557					0.00147219	0.00026432	0.000122595	0.000619702		2.83679e-06	6.47752e-06	6.01846e-06	5.11093e-06		121.25
NM_001205095	642	222	156	110	162.667		216	345	553	371.333				0.345794	0.242991	0.17134			0.336449	0.537383	0.861371					0.000161737	1.77547e-05	1.00628e-05	6.31849e-05		4.24968e-07	5.67742e-07	5.71848e-07	5.21519e-07		121.156
NM_008400	1141	682	424	178	428		1380	883	456	906.333				0.597721	0.371604	0.156004			1.20947	0.773883	0.399649					0.00027957	2.71521e-05	9.16213e-06	0.000105295		1.52767e-06	8.17602e-07	2.6532e-07	8.70199e-07		121.001
NM_019814	76	209	388	224	273.667		391	217	646	418				2.75	5.10526	2.94737			5.14474	2.85526	8.5					0.00128625	0.000373028	0.0001731	0.000610792		6.49831e-06	3.01657e-06	5.64299e-06	5.05262e-06		120.886
NM_001081019	117	1964	3325	2683	2657.33		816	4371	7933	4373.33				16.7863	28.4188	22.9316			6.97436	37.359	67.8034					0.00785141	0.00207649	0.00134678	0.00375823		8.8093e-06	3.94695e-05	4.50134e-05	3.10974e-05		120.853
NM_028012	307	100	186	114	133.333		157	138	319	204.667				0.325733	0.605863	0.371336			0.511401	0.449511	1.03909					0.000152354	4.42688e-05	2.18086e-05	7.28105e-05		6.45949e-07	4.74906e-07	6.89831e-07	6.03562e-07		120.635
NM_001253873	1142	682	425	181	429.333		1388	884	456	909.333				0.597198	0.372154	0.158494			1.21541	0.774081	0.399299					0.000279325	2.71923e-05	9.30838e-06	0.000105275		1.53518e-06	8.17811e-07	2.65087e-07	8.72694e-07		120.633
NM_001039187	259	137	143	58	112.667		149	283	240	224				0.528958	0.552124	0.223938			0.57529	1.09266	0.926641					0.000247408	4.03422e-05	1.31519e-05	0.000100301		7.26647e-07	1.15439e-06	6.15179e-07	8.32073e-07		120.543
NM_007856	452	320	286	252	286		525	382	711	539.333				0.707965	0.632743	0.557522			1.1615	0.845133	1.57301					0.000331134	4.62329e-05	3.27434e-05	0.000136703		1.46709e-06	8.92878e-07	1.04429e-06	1.13475e-06		120.47
NM_031869	251	102	174	108	128		192	126	269	195.667				0.406375	0.693227	0.430279			0.76494	0.501992	1.07171					0.000190072	5.06523e-05	2.52704e-05	8.8665e-05		9.66195e-07	5.30352e-07	7.1149e-07	7.36012e-07		120.467
NM_025974	198	2304	3150	2311	2588.33		3404	2320	7891	4538.33				11.6364	15.9091	11.6717			17.1919	11.7172	39.8535					0.00544264	0.00116244	0.000685483	0.00243019		2.17151e-05	1.23791e-05	2.6458e-05	2.01841e-05		120.401
NM_020030	230	310	425	406	380.333		222	517	1256	665				1.34783	1.84783	1.76522			0.965217	2.24783	5.46087					0.000630414	0.000135016	0.000103672	0.000289701		1.21916e-06	2.37481e-06	3.62537e-06	2.40645e-06		120.385
NM_001177627	424	181	242	125	182.667		317	267	345	309.667				0.426887	0.570755	0.294811			0.747642	0.629717	0.813679					0.000199666	4.17035e-05	1.73143e-05	8.62281e-05		9.44345e-07	6.65292e-07	5.40186e-07	7.16608e-07		120.328
NM_001113518	686	1456	1898	1338	1564		1637	2484	4185	2768.67				2.12245	2.76676	1.95044			2.3863	3.62099	6.10058					0.000992726	0.00020216	0.00011455	0.000436479		3.01413e-06	3.82556e-06	4.05006e-06	3.62991e-06		120.245
NM_198095	153	4423	1781	973	2392.33		6932	4704	7591	6409				28.9085	11.6405	6.35948			45.3072	30.7451	49.6144					0.0135213	0.000850542	0.000373494	0.00491511		5.72274e-05	3.2482e-05	3.2938e-05	4.08825e-05		120.225
NM_008252	191	1051	1395	1001	1149		1153	1490	3611	2084.67				5.50262	7.30366	5.24084			6.03665	7.80105	18.9058					0.00257372	0.00053366	0.000307796	0.00113839		7.62488e-06	8.24176e-06	1.25512e-05	9.4726e-06		120.177
NM_009256	355	192	230	252	224.667		172	313	697	394				0.540845	0.647887	0.709859			0.484507	0.88169	1.96338					0.000252968	4.73394e-05	4.16902e-05	0.000113999		6.1198e-07	9.315e-07	1.30345e-06	9.48977e-07		120.128
NM_023403	205	298	395	312	335		328	383	1109	606.667				1.45366	1.92683	1.52195			1.6	1.86829	5.40976					0.000679915	0.000140788	8.93846e-05	0.000303363		2.02096e-06	1.97384e-06	3.59143e-06	2.52874e-06		119.966
NM_008946	219	1057	1507	1225	1263		1664	1230	3384	2092.67				4.82648	6.88128	5.59361			7.59817	5.61644	15.4521					0.00225748	0.000502797	0.000328514	0.0010296		9.59724e-06	5.93373e-06	1.02583e-05	8.59643e-06		119.77
NM_010288	363	132	187	90	136.333		158	307	226	230.333				0.363636	0.515152	0.247934			0.435262	0.84573	0.62259					0.000170082	3.76408e-05	1.45612e-05	7.40948e-05		5.49778e-07	8.93509e-07	4.13325e-07	6.18871e-07		119.726
NM_011354	40	831	849	465	715		761	815	3270	1615.33				20.775	21.225	11.625			19.025	20.375	81.75					0.00971703	0.00155085	0.000682739	0.00398354		2.40304e-05	2.15261e-05	5.42723e-05	3.32763e-05		119.711
NM_009081	118	2124	2856	1759	2246.33		2670	2057	8075	4267.33				18	24.2034	14.9068			22.6271	17.4322	68.4322					0.00841908	0.00176848	0.000875479	0.00368768		2.85803e-05	1.8417e-05	4.54308e-05	3.08094e-05		119.693
NM_025996	290	376	369	312	352.333		284	573	1331	729.333				1.29655	1.27241	1.07586			0.97931	1.97586	4.58966					0.000606432	9.29719e-05	6.31857e-05	0.000254197		1.23697e-06	2.08749e-06	3.04698e-06	2.12381e-06		119.689
NM_025592	104	2576	2957	1527	2353.33		3045	2912	8597	4851.33				24.7692	28.4327	14.6827			29.2788	28	82.6635					0.0115852	0.0020775	0.000862318	0.00484168		3.69821e-05	2.95818e-05	5.48787e-05	4.04809e-05		119.604
NM_028230	485	470	474	445	463		827	515	1141	827.667				0.969072	0.97732	0.917526			1.70515	1.06186	2.35258					0.000453261	7.14102e-05	5.38865e-05	0.000192853		2.15378e-06	1.12184e-06	1.56183e-06	1.61248e-06		119.6
NM_011420	269	212	226	155	197.667		225	239	764	409.333				0.788104	0.840149	0.576208			0.836431	0.888476	2.84015					0.000368617	6.13875e-05	3.38409e-05	0.000154615		1.05649e-06	9.38669e-07	1.88552e-06	1.29356e-06		119.527
NM_001113488	315	853	1086	575	838		980	1137	2787	1634.67				2.70794	3.44762	1.8254			3.11111	3.60952	8.84762					0.00126657	0.000251908	0.000107206	0.000541896		3.92964e-06	3.81344e-06	5.87377e-06	4.53895e-06		119.388
NM_017380	315	853	1086	575	838		980	1137	2787	1634.67				2.70794	3.44762	1.8254			3.11111	3.60952	8.84762					0.00126657	0.000251908	0.000107206	0.000541896		3.92964e-06	3.81344e-06	5.87377e-06	4.53895e-06		119.388
NM_001081211	322	422	500	278	400		744	571	834	716.333				1.31056	1.5528	0.863354			2.31056	1.77329	2.59006					0.000612984	0.000113459	5.0705e-05	0.000259049		2.91846e-06	1.87347e-06	1.71949e-06	2.17048e-06		119.351
NM_025450	101	235	237	163	211.667		259	285	782	442				2.32673	2.34653	1.61386			2.56436	2.82178	7.74257					0.00108828	0.000171455	9.47825e-05	0.000451504		3.23903e-06	2.9812e-06	5.14015e-06	3.78679e-06		119.231
NM_001171026	653	1659	1797	1257	1571		2136	2198	4862	3065.33				2.54058	2.75191	1.92496			3.27106	3.366	7.44564					0.0011883	0.000201075	0.000113053	0.000500809		4.13167e-06	3.55616e-06	4.94302e-06	4.21028e-06		118.949
NM_018794	444	4414	4839	4214	4489		5168	6445	13681	8431.33				9.94144	10.8986	9.49099			11.6396	14.5158	30.8131					0.00464988	0.000796336	0.000557408	0.00200121		1.4702e-05	1.53358e-05	2.04562e-05	1.68313e-05		118.898
NM_025878	235	269	313	217	266.333		245	374	984	534.333				1.14468	1.33191	0.923404			1.04255	1.59149	4.18723					0.000535398	9.73195e-05	5.42318e-05	0.000228983		1.31685e-06	1.6814e-06	2.77983e-06	1.92602e-06		118.889
NM_026524	163	196	194	142	177.333		269	200	618	362.333				1.20245	1.19018	0.871166			1.65031	1.22699	3.79141					0.00056242	8.69636e-05	5.11638e-05	0.000233516		2.0845e-06	1.29631e-06	2.51705e-06	1.96595e-06		118.78
NM_001166635	163	196	194	142	177.333		269	200	618	362.333				1.20245	1.19018	0.871166			1.65031	1.22699	3.79141					0.00056242	8.69636e-05	5.11638e-05	0.000233516		2.0845e-06	1.29631e-06	2.51705e-06	1.96595e-06		118.78
NM_001037999	116	876	1640	961	1159		1199	1094	3410	1901				7.55172	14.1379	8.28448			10.3362	9.43103	29.3966					0.00353214	0.00103302	0.00048655	0.00168391		1.30556e-05	9.96383e-06	1.95158e-05	1.41784e-05		118.765
NM_026780	223	272	427	287	328.667		352	331	1027	570				1.21973	1.9148	1.287			1.57848	1.4843	4.60538					0.000570501	0.000139909	7.55856e-05	0.000261999		1.99377e-06	1.56816e-06	3.05743e-06	2.20645e-06		118.742
NM_001253905	2234	474	764	599	612.333		657	913	1270	946.667				0.212175	0.341987	0.268129			0.294091	0.408684	0.568487					9.92402e-05	2.49881e-05	1.57473e-05	4.66585e-05		3.71466e-07	4.31772e-07	3.77408e-07	3.93549e-07		118.558
NM_001098271	225	97	128	75	100		127	197	197	173.667				0.431111	0.568889	0.333333			0.564444	0.875556	0.875556					0.000201642	4.15672e-05	1.95768e-05	8.75954e-05		7.12949e-07	9.25019e-07	5.81265e-07	7.39744e-07		118.413
NM_025326	225	97	128	75	100		127	197	197	173.667				0.431111	0.568889	0.333333			0.564444	0.875556	0.875556					0.000201642	4.15672e-05	1.95768e-05	8.75954e-05		7.12949e-07	9.25019e-07	5.81265e-07	7.39744e-07		118.413
NM_019716	243	192	239	229	220		175	264	784	407.667				0.790123	0.983539	0.942387			0.720165	1.08642	3.22634					0.000369562	7.18646e-05	5.53466e-05	0.000165591		9.09639e-07	1.1478e-06	2.1419e-06	1.39978e-06		118.298
NM_009987	335	2234	2332	2782	2449.33		2894	3016	7276	4395.33				6.66866	6.96119	8.30448			8.63881	9.00299	21.7194					0.00311911	0.000508636	0.000487724	0.00137182		1.09117e-05	9.5116e-06	1.44191e-05	1.16141e-05		118.117
NM_183208	1053	774	1114	1002	963.333		940	1020	2996	1652				0.735043	1.05793	0.951567			0.892688	0.968661	2.8452					0.000343799	7.73001e-05	5.58858e-05	0.000158995		1.12755e-06	1.02338e-06	1.88888e-06	1.3466e-06		118.071
NM_011740	226	3707	5757	3726	4396.67		4822	5312	12717	7617				16.4027	25.4735	16.4867			21.3363	23.5044	56.2699					0.00767196	0.00186128	0.00096827	0.0035005		2.69498e-05	2.48323e-05	3.73565e-05	2.97129e-05		117.811
NM_001253806	226	3707	5757	3726	4396.67		4822	5312	12717	7617				16.4027	25.4735	16.4867			21.3363	23.5044	56.2699					0.00767196	0.00186128	0.00096827	0.0035005		2.69498e-05	2.48323e-05	3.73565e-05	2.97129e-05		117.811
NM_001253805	226	3707	5757	3726	4396.67		4822	5312	12717	7617				16.4027	25.4735	16.4867			21.3363	23.5044	56.2699					0.00767196	0.00186128	0.00096827	0.0035005		2.69498e-05	2.48323e-05	3.73565e-05	2.97129e-05		117.811
NM_011672	288	345	545	311	400.333		534	478	1031	681				1.19792	1.89236	1.07986			1.85417	1.65972	3.57986					0.000560298	0.00013827	6.34205e-05	0.000253996		2.34199e-06	1.75349e-06	2.3766e-06	2.15736e-06		117.735
NM_023665	279	448	375	376	399.667		788	617	833	746				1.60573	1.34409	1.34767			2.82437	2.21147	2.98566					0.000751045	9.82088e-05	7.9149e-05	0.000309468		3.56746e-06	2.3364e-06	1.98213e-06	2.62866e-06		117.728
NM_170702	241	190	124	92	135.333		318	248	324	296.667				0.788382	0.514523	0.381743			1.3195	1.02905	1.3444					0.000368747	3.75948e-05	2.24198e-05	0.000142921		1.66666e-06	1.08718e-06	8.92521e-07	1.21545e-06		117.586
NM_019456	651	2517	3059	2460	2678.67		3751	3553	7009	4771				3.86636	4.69892	3.7788			5.7619	5.45776	10.7665					0.0018084	0.000343338	0.00022193	0.000791223		7.27785e-06	5.76609e-06	7.14768e-06	6.73054e-06		117.557
NM_001039185	502	218	210	93	173.667		285	348	478	370.333				0.434263	0.418327	0.185259			0.567729	0.693227	0.952191					0.000203116	3.0566e-05	1.08803e-05	8.15209e-05		7.17098e-07	7.3239e-07	6.32142e-07	6.93877e-07		117.486
NM_001161370	325	174	228	192	198		126	302	684	370.667				0.535385	0.701538	0.590769			0.387692	0.929231	2.10462					0.000250414	5.12596e-05	3.4696e-05	0.000112123		4.89694e-07	9.81727e-07	1.39721e-06	9.56211e-07		117.258
NM_007830	68	846	1594	931	1123.67		1178	1074	3343	1865				12.4412	23.4412	13.6912			17.3235	15.7941	49.1618					0.00581907	0.00171279	0.000804086	0.00277865		2.18813e-05	1.66864e-05	3.26376e-05	2.37351e-05		117.069
NM_010887	156	335	492	377	401.333		325	459	1415	733				2.14744	3.15385	2.41667			2.08333	2.94231	9.07051					0.00100441	0.000230443	0.000141931	0.000458929		2.63145e-06	3.10853e-06	6.02174e-06	3.92058e-06		117.057
NM_023835	278	204	274	150	209.333		238	296	678	404				0.733813	0.985612	0.539568			0.856115	1.06475	2.43885					0.000343224	7.2016e-05	3.1689e-05	0.000148976		1.08136e-06	1.1249e-06	1.61911e-06	1.27512e-06		116.833
NM_009016	234	279	396	382	352.333		225	488	1143	618.667				1.19231	1.69231	1.63248			0.961538	2.08547	4.88462					0.000557674	0.000123652	9.58759e-05	0.000259068		1.21452e-06	2.20329e-06	3.2428e-06	2.2202e-06		116.686
NM_009017	234	279	396	382	352.333		225	488	1143	618.667				1.19231	1.69231	1.63248			0.961538	2.08547	4.88462					0.000557674	0.000123652	9.58759e-05	0.000259068		1.21452e-06	2.20329e-06	3.2428e-06	2.2202e-06		116.686
NM_023260	199	160	121	120	133.667		140	203	582	308.333				0.80402	0.60804	0.603015			0.703518	1.0201	2.92462					0.000376062	4.44279e-05	3.54152e-05	0.000151968		8.88612e-07	1.07773e-06	1.9416e-06	1.30265e-06		116.661
NM_001080964	593	117	176	126	139.667		216	143	330	229.667				0.197302	0.296796	0.212479			0.36425	0.241147	0.556492					9.22834e-05	2.16861e-05	1.24789e-05	4.21495e-05		4.60083e-07	2.5477e-07	3.69445e-07	3.61433e-07		116.618
NM_030220	594	117	176	126	139.667		216	143	330	229.667				0.19697	0.296296	0.212121			0.363636	0.240741	0.555556					9.2128e-05	2.16496e-05	1.24579e-05	4.20785e-05		4.59308e-07	2.54341e-07	3.68823e-07	3.60824e-07		116.618
NM_027360	39	382	598	386	455.333		302	809	1303	804.667				9.79487	15.3333	9.89744			7.74359	20.7436	33.4103					0.00458132	0.00112037	0.000581279	0.00209432		9.78092e-06	2.19155e-05	2.21804e-05	1.79589e-05		116.617
NM_001253807	205	3540	5370	3368	4092.67		4533	5145	12249	7309				17.2683	26.1951	16.4293			22.1122	25.0976	59.7512					0.00807684	0.00191401	0.000964895	0.00365192		2.79299e-05	2.65154e-05	3.96677e-05	3.1371e-05		116.411
NM_013546	171	182	220	106	169.333		163	237	703	367.667				1.06433	1.28655	0.619883			0.953216	1.38596	4.11111					0.000497815	9.40048e-05	3.64059e-05	0.000209408		1.20401e-06	1.46426e-06	2.72929e-06	1.79919e-06		116.391
NM_023587	235	421	489	415	441.667		560	540	1402	834				1.79149	2.08085	1.76596			2.38298	2.29787	5.96596					0.000837928	0.000152042	0.000103715	0.000364562		3.00994e-06	2.42769e-06	3.96069e-06	3.13277e-06		116.37
NM_001001187	774	132	128	93	117.667		152	193	395	246.667				0.170543	0.165375	0.120155			0.196382	0.249354	0.510336					7.97674e-05	1.20835e-05	7.05674e-06	3.29692e-05		2.4805e-07	2.63441e-07	3.38802e-07	2.83431e-07		116.322
NM_013640	254	439	479	358	425.333		671	492	1327	830				1.72835	1.88583	1.40945			2.64173	1.93701	5.22441					0.000808394	0.000137792	8.27773e-05	0.000342988		3.33677e-06	2.04644e-06	3.46839e-06	2.95053e-06		116.246
NM_019502	81	147	200	193	180		174	213	558	315				1.81481	2.46914	2.38272			2.14815	2.62963	6.88889					0.000848838	0.000180413	0.000139938	0.000389729		2.71332e-06	2.77819e-06	4.5734e-06	3.35497e-06		116.165
NM_028784	713	893	376	66	445		2021	997	398	1138.67				1.25245	0.527349	0.0925666			2.8345	1.39832	0.558205					0.000585807	3.8532e-05	5.43646e-06	0.000209925		3.58025e-06	1.47731e-06	3.70582e-07	1.80938e-06		116.02
NM_001166391	713	893	376	66	445		2021	997	398	1138.67				1.25245	0.527349	0.0925666			2.8345	1.39832	0.558205					0.000585807	3.8532e-05	5.43646e-06	0.000209925		3.58025e-06	1.47731e-06	3.70582e-07	1.80938e-06		116.02
NM_015807	181	205	224	162	197		272	243	680	398.333				1.1326	1.23757	0.895028			1.50276	1.34254	3.75691					0.000529746	9.04259e-05	5.25652e-05	0.000224246		1.89814e-06	1.41839e-06	2.49414e-06	1.93689e-06		115.776
NM_011018	423	4165	2729	3246	3380		6821	4025	11051	7299				9.84634	6.45154	7.67376			16.1253	9.51537	26.1253					0.0046054	0.000471397	0.000450682	0.00184249		2.03678e-05	1.00529e-05	1.73441e-05	1.59216e-05		115.723
NM_172758	444	228	121	96	148.333		438	211	410	353				0.513514	0.272523	0.216216			0.986486	0.475225	0.923423					0.000240184	1.99125e-05	1.26984e-05	9.09317e-05		1.24603e-06	5.02073e-07	6.13043e-07	7.87048e-07		115.535
NM_008617	319	1511	2311	1654	1825.33		1585	3001	4901	3162.33				4.73668	7.24451	5.18495			4.96865	9.40752	15.3636					0.00221547	0.000529338	0.000304514	0.00101644		6.2759e-06	9.93899e-06	1.01996e-05	8.80484e-06		115.441
NM_181392	52	69	224	179	157.333		72	132	425	209.667				1.32692	4.30769	3.44231			1.38462	2.53846	8.17308					0.000620638	0.000314752	0.000202168	0.000379186		1.74891e-06	2.68187e-06	5.42595e-06	3.28558e-06		115.409
NM_001013578	118	181	154	92	142.333		184	217	627	342.667				1.5339	1.30508	0.779661			1.55932	1.83898	5.31356					0.000717445	9.53591e-05	4.57897e-05	0.000286198		1.96958e-06	1.94287e-06	3.52757e-06	2.48001e-06		115.402
NM_146124	420	652	843	553	682.667		813	1126	1879	1272.67				1.55238	2.00714	1.31667			1.93571	2.68095	4.47381					0.00072609	0.000146657	7.73282e-05	0.000316692		2.445e-06	2.83241e-06	2.97008e-06	2.74916e-06		115.196
NM_011424	2449	496	805	616	639		734	970	1340	1014.67				0.202532	0.328706	0.251531			0.299714	0.39608	0.547162					9.47295e-05	2.40177e-05	1.47725e-05	4.45065e-05		3.78568e-07	4.18456e-07	3.63251e-07	3.86758e-07		115.076
NM_010876	371	2326	2816	2261	2467.67		2766	3108	8481	4785				6.26954	7.5903	6.09434			7.45553	8.37736	22.8598					0.00293243	0.000554603	0.000357922	0.00128165		9.41706e-06	8.85063e-06	1.51762e-05	1.1148e-05		114.967
NM_001253904	2313	481	804	623	636		699	970	1324	997.667				0.207955	0.347601	0.269347			0.302205	0.419369	0.572417					9.72662e-05	2.53983e-05	1.58188e-05	4.61611e-05		3.81715e-07	4.43061e-07	3.80017e-07	4.01597e-07		114.944
NM_133354	76	702	783	546	677		963	920	2186	1356.33				9.23684	10.3026	7.18421			12.6711	12.1053	28.7632					0.00432032	0.000752786	0.00042193	0.00183168		1.60048e-05	1.27891e-05	1.90953e-05	1.59631e-05		114.745
NM_001008425	322	176	207	170	184.333		168	275	653	365.333				0.546584	0.642857	0.52795			0.521739	0.854037	2.02795					0.000255652	4.69719e-05	3.10067e-05	0.00011121		6.59008e-07	9.02285e-07	1.34632e-06	9.69204e-07		114.744
NM_001033389	556	194	264	215	224.333		283	283	622	396				0.348921	0.47482	0.386691			0.508993	0.508993	1.11871					0.0001632	3.46939e-05	2.27104e-05	7.35347e-05		6.42908e-07	5.37748e-07	7.42687e-07	6.41114e-07		114.698
NM_001253740	229	3299	4784	2572	3551.67		5874	3579	10011	6488				14.4061	20.8908	11.2314			25.6507	15.6288	43.7162					0.00673813	0.00152644	0.000659625	0.00297473		3.23993e-05	1.65118e-05	2.90223e-05	2.59778e-05		114.51
NM_145484	532	149	129	93	123.667		78	320	457	285				0.280075	0.242481	0.174812			0.146617	0.601504	0.859023					0.000130999	1.77175e-05	1.02668e-05	5.29943e-05		1.85191e-07	6.35485e-07	5.70289e-07	4.63655e-07		114.297
NM_001163239	168	182	394	267	281		246	365	660	423.667				1.08333	2.34524	1.58929			1.46429	2.17262	3.92857					0.000506704	0.00017136	9.33392e-05	0.000257135		1.84954e-06	2.29536e-06	2.6081e-06	2.251e-06		114.231
NM_080837	147	335	411	335	360.333		573	460	901	644.667				2.27891	2.79592	2.27891			3.89796	3.12925	6.12925					0.00106591	0.00020429	0.000133841	0.000468013		4.92351e-06	3.30604e-06	4.06909e-06	4.09954e-06		114.162
NM_194069	146	152	552	491	398.333		134	255	1190	526.333				1.0411	3.78082	3.36301			0.917808	1.74658	8.15068					0.000486948	0.000276255	0.000197511	0.000320238		1.15928e-06	1.84525e-06	5.41109e-06	2.8052e-06		114.159
NM_172054	207	790	831	567	729.333		1355	1119	1777	1417				3.81643	4.01449	2.73913			6.54589	5.4058	8.58454					0.00178504	0.000293328	0.00016087	0.000746414		8.26811e-06	5.71119e-06	5.69911e-06	6.55947e-06		113.792
NM_029607	209	207	296	201	234.667		312	291	669	424				0.990431	1.41627	0.961722			1.49282	1.39234	3.20096					0.000463251	0.000103483	5.64822e-05	0.000207739		1.88558e-06	1.471e-06	2.12505e-06	1.82721e-06		113.692
NM_026829	184	124	249	185	186		172	217	482	290.333				0.673913	1.35326	1.00543			0.934783	1.17935	2.61957					0.000315207	9.88792e-05	5.90494e-05	0.000157712		1.18072e-06	1.24597e-06	1.73908e-06	1.38859e-06		113.577
NM_144539	314	245	179	106	176.667		362	322	575	419.667				0.780255	0.570064	0.33758			1.15287	1.02548	1.83121					0.000364946	4.16531e-05	1.98261e-05	0.000142142		1.45618e-06	1.08341e-06	1.21571e-06	1.25177e-06		113.553
NM_134054	52	176	307	268	250.333		276	358	505	379.667				3.38462	5.90385	5.15385			5.30769	6.88462	9.71154					0.00158308	0.000431379	0.000302687	0.00077238		6.70414e-06	7.27355e-06	6.44731e-06	6.80833e-06		113.446
NM_009093	37	1430	1986	1611	1675.67		2895	1275	4529	2899.67				38.6486	53.6757	43.5405			78.2432	34.4595	122.405					0.018077	0.00392194	0.00255715	0.00818537		9.88289e-05	3.64062e-05	8.12626e-05	7.21659e-05		113.424
NM_011358	202	393	617	503	504.333		487	593	1564	881.333				1.94554	3.05446	2.4901			2.41089	2.93564	7.74257					0.000909983	0.000223181	0.000146244	0.00042647		3.04519e-06	3.10149e-06	5.14015e-06	3.76228e-06		113.354
NM_028769	593	321	478	399	399.333		705	465	693	621				0.541315	0.806071	0.67285			1.18887	0.784148	1.16863					0.000253188	5.88975e-05	3.95166e-05	0.000117201		1.50166e-06	8.28448e-07	7.75834e-07	1.03531e-06		113.203
NM_001164709	593	321	478	399	399.333		705	465	693	621				0.541315	0.806071	0.67285			1.18887	0.784148	1.16863					0.000253188	5.88975e-05	3.95166e-05	0.000117201		1.50166e-06	8.28448e-07	7.75834e-07	1.03531e-06		113.203
NM_025327	117	303	551	334	396		693	370	776	613				2.58974	4.7094	2.8547			5.92308	3.16239	6.63248					0.00121129	0.000344104	0.000167657	0.000574351		7.48143e-06	3.34105e-06	4.40318e-06	5.07522e-06		113.168
NM_011304	444	355	445	344	381.333		589	458	1065	704				0.79955	1.00225	0.774775			1.32658	1.03153	2.39865					0.000373971	7.32319e-05	4.55027e-05	0.000164235		1.6756e-06	1.08981e-06	1.59242e-06	1.45261e-06		113.062
NM_026994	314	155	242	169	188.667		122	233	731	362				0.493631	0.770701	0.538217			0.388535	0.742038	2.32803					0.000230884	5.63131e-05	3.16096e-05	0.000106269		4.90758e-07	7.83959e-07	1.54553e-06	9.40083e-07		113.042
NM_153513	129	514	630	416	520		236	1008	2091	1111.67				3.9845	4.88372	3.22481			1.82946	7.81395	16.2093					0.00186366	0.000356841	0.000189394	0.000803297		2.31078e-06	8.25539e-06	1.0761e-05	7.10908e-06		112.996
NM_133747	496	191	241	149	193.667		261	315	546	374				0.385081	0.485887	0.300403			0.52621	0.635081	1.10081					0.000180113	3.55025e-05	1.76428e-05	7.77526e-05		6.64655e-07	6.70959e-07	7.30805e-07	6.88806e-07		112.88
NM_001004721	416	652	664	520	612		930	1012	1745	1229				1.56731	1.59615	1.25			2.23558	2.43269	4.19471					0.000733072	0.000116627	7.34128e-05	0.000307704		2.82375e-06	2.57012e-06	2.78479e-06	2.72622e-06		112.868
NM_026307	158	236	192	198	208.667		429	194	691	438				1.49367	1.21519	1.25316			2.71519	1.22785	4.37342					0.00069863	8.87907e-05	7.35987e-05	0.000287006		3.42955e-06	1.29721e-06	2.90343e-06	2.5434e-06		112.844
NM_025387	95	228	576	482	428.667		304	477	1029	603.333				2.4	6.06316	5.07368			3.2	5.02105	10.8316					0.00112254	0.000443019	0.000297979	0.000621181		4.04191e-06	5.30471e-06	7.19088e-06	5.5125e-06		112.686
NM_008225	467	2032	2811	2532	2458.33		3027	2856	7135	4339.33				4.35118	6.01927	5.42184			6.4818	6.11563	15.2784					0.00203516	0.000439812	0.000318426	0.000931134		8.18715e-06	6.46113e-06	1.0143e-05	8.26377e-06		112.677
NM_010380	343	14102	9441	10173	11238.7		22900	17641	33764	24768.3				41.1137	27.5248	29.6589			66.7638	51.4315	98.4373					0.01923	0.00201116	0.00174187	0.00766101		8.43293e-05	5.43371e-05	6.53507e-05	6.80057e-05		112.652
NM_011289	117	2694	3045	2326	2688.33		3921	3649	8390	5320				23.0256	26.0256	19.8803			33.5128	31.188	71.7094					0.0107697	0.00190163	0.00116758	0.00461297		4.233e-05	3.295e-05	4.76065e-05	4.09622e-05		112.615
NM_010700	843	1454	1343	1093	1296.67		2507	1560	4017	2694.67				1.72479	1.59312	1.29656			2.9739	1.85053	4.76512					0.000806732	0.000116405	7.61473e-05	0.000333095		3.75633e-06	1.95508e-06	3.16348e-06	2.9583e-06		112.597
NM_001009818	410	324	434	250	336		494	545	842	627				0.790244	1.05854	0.609756			1.20488	1.32927	2.05366					0.000369618	7.73445e-05	3.58111e-05	0.000160925		1.52188e-06	1.40436e-06	1.36338e-06	1.42988e-06		112.544
NM_025854	431	138	164	120	140.667		185	173	492	283.333				0.320186	0.38051	0.278422			0.429234	0.401392	1.14153					0.000149759	2.78029e-05	1.63518e-05	6.4638e-05		5.42165e-07	4.24068e-07	7.57841e-07	5.74691e-07		112.474
NM_001252659	842	1454	1339	1089	1294		2510	1565	4025	2700				1.72684	1.59026	1.29335			2.981	1.85867	4.78029					0.00080769	0.000116196	7.59587e-05	0.000333282		3.76529e-06	1.96367e-06	3.17354e-06	2.9675e-06		112.31
NM_010062	334	1067	1059	983	1036.33		1738	1345	3065	2049.33				3.19461	3.17066	2.94311			5.20359	4.02695	9.17665					0.00149421	0.000231672	0.00017285	0.000632909		6.57265e-06	4.25444e-06	6.0922e-06	5.63976e-06		112.223
NM_001005858	384	782	785	286	617.667		1062	1573	1381	1338.67				2.03646	2.04427	0.744792			2.76562	4.09635	3.59635					0.000952506	0.000149369	4.37418e-05	0.000381873		3.49326e-06	4.32777e-06	2.38755e-06	3.40286e-06		112.221
NM_007510	207	1287	2141	1460	1629.33		1369	2156	5348	2957.67				6.21739	10.343	7.05314			6.61353	10.4155	25.8357					0.00290804	0.000755735	0.000414233	0.00135934		8.35353e-06	1.10039e-05	1.71519e-05	1.21698e-05		111.698
NM_184052	146	1356	1730	1181	1422.33		2140	1808	4245	2731				9.28767	11.8493	8.08904			14.6575	12.3836	29.0753					0.00434409	0.000865798	0.000475071	0.00189499		1.85139e-05	1.30832e-05	1.93026e-05	1.69665e-05		111.69
NM_001198823	751	9532	9063	6867	8487.33		13059	13198	28700	18319				12.6924	12.0679	9.14381			17.3888	17.5739	38.2157					0.00593658	0.00088177	0.000537018	0.00245179		2.19638e-05	1.85667e-05	2.53707e-05	2.19671e-05		111.612
NM_001136073	904	254	353	222	276.333		382	389	782	517.667				0.280973	0.390487	0.245575			0.422566	0.43031	0.865044					0.000131419	2.85318e-05	1.44227e-05	5.81245e-05		5.33743e-07	4.5462e-07	5.74286e-07	5.20883e-07		111.588
NM_008670	1384	271	371	201	281		418	420	776	538				0.195809	0.268064	0.145231			0.302023	0.303468	0.560694					9.15852e-05	1.95867e-05	8.52947e-06	3.99005e-05		3.81485e-07	3.20612e-07	3.72234e-07	3.5811e-07		111.419
NM_033578	911	106	120	80	102		204	133	253	196.667				0.116356	0.131723	0.0878156			0.22393	0.145993	0.277717					5.44227e-05	9.62468e-06	5.15743e-06	2.30683e-05		2.82845e-07	1.54241e-07	1.84371e-07	2.07152e-07		111.359
NM_023127	39	206	255	149	203.333		264	270	742	425.333				5.28205	6.53846	3.82051			6.76923	6.92308	19.0256					0.00247056	0.000477748	0.00022438	0.00105756		8.5502e-06	7.31419e-06	1.26308e-05	9.49838e-06		111.341
NM_001077529	133	1848	2062	1367	1759		2349	2361	6601	3770.33				13.8947	15.5038	10.2782			17.6617	17.7519	49.6316					0.00649894	0.00113282	0.000603641	0.00274513		2.23084e-05	1.87548e-05	3.29495e-05	2.46709e-05		111.27
NM_008705	133	1848	2062	1367	1759		2349	2361	6601	3770.33				13.8947	15.5038	10.2782			17.6617	17.7519	49.6316					0.00649894	0.00113282	0.000603641	0.00274513		2.23084e-05	1.87548e-05	3.29495e-05	2.46709e-05		111.27
NM_178376	294	525	875	665	688.333		469	1404	1596	1156.33				1.78571	2.97619	2.2619			1.59524	4.77551	5.42857					0.000835227	0.000217462	0.000132842	0.000395177		2.01494e-06	5.0453e-06	3.60393e-06	3.55472e-06		111.17
NM_009976	121	7060	8392	9846	8432.67		7939	9612	30494	16015				58.3471	69.3554	81.3719			65.6116	79.438	252.017					0.0272905	0.00506761	0.00477899	0.012379		8.28739e-05	8.39258e-05	0.000167309	0.00011137		111.153
NM_011865	337	1594	1927	1331	1617.33		1653	3084	5052	3263				4.72997	5.7181	3.94955			4.90504	9.15134	14.9911					0.00221233	0.000417807	0.000231958	0.000954033		6.19555e-06	9.66833e-06	9.95231e-06	8.6054e-06		110.865
NM_001198826	733	9475	9004	6788	8422.33		13391	13042	28504	18312.3				12.9263	12.2838	9.26057			18.2688	17.7926	38.8868					0.00604599	0.000897542	0.000543876	0.0024958		2.30752e-05	1.87978e-05	2.58162e-05	2.25631e-05		110.614
NM_022321	312	558	490	395	481		974	660	1457	1030.33				1.78846	1.57051	1.26603			3.12179	2.11538	4.66987					0.000836511	0.000114753	7.4354e-05	0.000341873		3.94313e-06	2.23489e-06	3.10024e-06	3.09275e-06		110.54
NM_028766	381	1065	1456	1066	1195.67		1605	1714	3317	2212				2.79528	3.82152	2.7979			4.2126	4.49869	8.70604					0.00130743	0.000279229	0.000164321	0.000583658		5.32093e-06	4.75284e-06	5.77977e-06	5.28451e-06		110.447
NM_181281	300	298	314	336	316		396	387	1114	632.333				0.993333	1.04667	1.12			1.32	1.29	3.71333					0.000464609	7.64772e-05	6.57779e-05	0.000202288		1.66729e-06	1.36288e-06	2.46521e-06	1.83179e-06		110.432
NM_013917	169	86	151	107	114.667		135	100	369	201.333				0.508876	0.893491	0.633136			0.798817	0.591716	2.18343					0.000238015	6.5285e-05	3.71842e-05	0.000113495		1.00898e-06	6.25144e-07	1.44954e-06	1.02789e-06		110.415
NM_025644	176	99	112	104	105		138	141	340	206.333				0.5625	0.636364	0.590909			0.784091	0.801136	1.93182					0.000263096	4.64974e-05	3.47042e-05	0.000114766		9.90384e-07	8.46396e-07	1.2825e-06	1.03976e-06		110.378
NM_022410	1941	12641	15540	11014	13065		20515	19883	34373	24923.7				6.51262	8.00618	5.67439			10.5693	10.2437	17.7089					0.00304613	0.000584991	0.000333259	0.00132146		1.33501e-05	1.08224e-05	1.17566e-05	1.19764e-05		110.339
NM_001252658	791	1384	1247	1019	1216.67		2426	1523	3888	2612.33				1.74968	1.57649	1.28824			3.067	1.92541	4.9153					0.000818374	0.00011519	7.56588e-05	0.000336408		3.87393e-06	2.03418e-06	3.26317e-06	3.05709e-06		110.042
NM_001111276	118	1636	1891	1299	1608.67		2597	2117	5102	3272				13.8644	16.0254	11.0085			22.0085	17.9407	43.2373					0.00648476	0.00117094	0.00064653	0.00276741		2.77989e-05	1.89542e-05	2.87044e-05	2.51525e-05		110.025
NM_015766	209	214	131	122	155.667		269	278	646	397.667				1.02392	0.626794	0.583732			1.28708	1.33014	3.09091					0.000478916	4.57982e-05	3.42827e-05	0.000186332		1.62571e-06	1.40529e-06	2.052e-06	1.69433e-06		109.974
NM_001161371	294	174	228	185	195.667		136	320	724	393.333				0.591837	0.77551	0.629252			0.462585	1.08844	2.46259					0.000276818	5.66645e-05	3.69561e-05	0.00012348		5.8429e-07	1.14993e-06	1.63486e-06	1.12303e-06		109.952
NM_009007	173	1493	2321	1430	1748		1767	2623	5511	3300.33				8.63006	13.4162	8.2659			10.2139	15.1618	31.8555					0.00403651	0.000980285	0.000485458	0.00183408		1.29011e-05	1.60184e-05	2.11483e-05	1.66893e-05		109.896
NM_010315	52	213	355	271	279.667		167	496	833	498.667				4.09615	6.82692	5.21154			3.21154	9.53846	16.0192					0.00191588	0.000498825	0.000306075	0.000906927		4.05649e-06	1.00773e-05	1.06349e-05	8.25623e-06		109.848
NM_001038637	52	213	355	271	279.667		167	496	833	498.667				4.09615	6.82692	5.21154			3.21154	9.53846	16.0192					0.00191588	0.000498825	0.000306075	0.000906927		4.05649e-06	1.00773e-05	1.06349e-05	8.25623e-06		109.848
NM_001164205	268	178	198	199	191.667		287	253	552	364				0.664179	0.738806	0.742537			1.0709	0.94403	2.0597					0.000310654	5.39826e-05	4.36094e-05	0.000136082		1.35265e-06	9.97362e-07	1.3674e-06	1.23913e-06		109.82
NM_011337	73	428	374	341	381		663	583	1208	818				5.86301	5.12329	4.67123			9.08219	7.9863	16.5479					0.00274229	0.000374345	0.000274343	0.00113033		1.14717e-05	8.43748e-06	1.09859e-05	1.02983e-05		109.758
NM_007657	207	4793	6798	6266	5952.33		7444	7428	16708	10526.7				23.1546	32.8406	30.2705			35.9614	35.8841	80.715					0.01083	0.00239957	0.0017778	0.00500246		4.54227e-05	3.79113e-05	5.35851e-05	4.56397e-05		109.608
NM_001145902	460	652	868	567	695.667		853	1227	1952	1344				1.41739	1.88696	1.23261			1.85435	2.66739	4.24348					0.000662952	0.000137875	7.23914e-05	0.000291073		2.34222e-06	2.81808e-06	2.81716e-06	2.65916e-06		109.461
NM_001080386	197	1902	1993	1050	1648.33		3901	1789	4834	3508				9.65482	10.1168	5.32995			19.802	9.08122	24.5381					0.00451582	0.000739204	0.000313029	0.00185602		2.50119e-05	9.59425e-06	1.62904e-05	1.69655e-05		109.399
NM_001198824	732	9399	8933	6772	8368		13141	13686	28280	18369				12.8402	12.2036	9.25137			17.9522	18.6967	38.6339					0.00600569	0.000891681	0.000543335	0.00248024		2.26754e-05	1.9753e-05	2.56483e-05	2.26922e-05		109.299
NM_028153	649	261	229	222	237.333		574	267	576	472.333				0.402157	0.352851	0.342065			0.884438	0.411402	0.887519					0.0001881	2.57819e-05	2.00895e-05	7.79904e-05		1.11713e-06	4.34644e-07	5.89207e-07	7.13661e-07		109.282
NM_008329	600	1552	2641	1140	1777.67		1852	3739	4125	3238.67				2.58667	4.40167	1.9			3.08667	6.23167	6.875					0.00120985	0.000321618	0.000111587	0.000547686		3.89876e-06	6.58372e-06	4.56418e-06	5.01555e-06		109.198
NM_008495	116	10462	13122	9882	11155.3		9837	7568	58068	25157.7				90.1897	113.121	85.1897			84.8017	65.2414	500.586					0.0421841	0.00826543	0.00500321	0.0184843		0.000107113	6.89271e-05	0.00033233	0.000169457		109.08
NM_133726	352	1415	1400	847	1220.67		1882	1770	4869	2840.33				4.01989	3.97727	2.40625			5.34659	5.02841	13.8324					0.00188021	0.000290609	0.00014132	0.000770712		6.75327e-06	5.31248e-06	9.18306e-06	7.08294e-06		108.813
NM_172746	582	145	186	162	164.333		228	240	444	304				0.249141	0.319588	0.278351			0.391753	0.412371	0.762887					0.00011653	2.33514e-05	1.63476e-05	5.20763e-05		4.94822e-07	4.35668e-07	5.06466e-07	4.78985e-07		108.722
NM_008390	310	187	240	207	211.333		249	277	711	412.333				0.603226	0.774194	0.667742			0.803226	0.893548	2.29355					0.000282145	5.65683e-05	3.92167e-05	0.000125977		1.01455e-06	9.44028e-07	1.52264e-06	1.16041e-06		108.562
NM_001159396	310	187	240	207	211.333		249	277	711	412.333				0.603226	0.774194	0.667742			0.803226	0.893548	2.29355					0.000282145	5.65683e-05	3.92167e-05	0.000125977		1.01455e-06	9.44028e-07	1.52264e-06	1.16041e-06		108.562
NM_134142	224	583	862	811	752		653	1278	2054	1328.33				2.60268	3.84821	3.62054			2.91518	5.70536	9.16964					0.00121734	0.000281179	0.000212635	0.000570386		3.68216e-06	6.02768e-06	6.08755e-06	5.26579e-06		108.319
NM_001198825	714	9342	8874	6693	8303		13473	13530	28084	18362.3				13.084	12.4286	9.37395			18.8697	18.9496	39.3333					0.00611975	0.000908123	0.000550534	0.00252614		2.38343e-05	2.00201e-05	2.61127e-05	2.33224e-05		108.314
NM_026512	272	127	175	163	155		120	216	566	300.667				0.466912	0.643382	0.599265			0.441176	0.794118	2.08088					0.000218387	4.70103e-05	3.5195e-05	0.000100197		5.57249e-07	8.3898e-07	1.38146e-06	9.25896e-07		108.217
NM_001111274	124	1378	1782	1193	1451		2251	1888	4474	2871				11.1129	14.371	9.62097			18.1532	15.2258	36.0806					0.0051978	0.00105005	0.000565042	0.00227096		2.29293e-05	1.6086e-05	2.39533e-05	2.09895e-05		108.195
NM_177686	248	6438	4478	5372	5429.33		8626	7848	22033	12835.7				25.9597	18.0565	21.6613			34.7823	31.6452	88.8427					0.012142	0.00131934	0.00127217	0.00491118		4.39334e-05	3.34329e-05	5.8981e-05	4.54491e-05		108.059
NM_009145	262	1980	2586	2560	2375.33		2233	3321	8141	4565				7.55725	9.87023	9.77099			8.5229	12.6756	31.0725					0.00353473	0.000721192	0.000573853	0.00160992		1.07653e-05	1.33917e-05	2.06285e-05	1.49285e-05		107.843
NM_001162500	365	562	508	406	492		999	688	1538	1075				1.53973	1.39178	1.11233			2.73699	1.88493	4.2137					0.000720171	0.000101694	6.53273e-05	0.000295731		3.45708e-06	1.99142e-06	2.79739e-06	2.74863e-06		107.592
NM_133847	624	1106	1144	757	1002.33		1531	1661	3479	2223.67				1.77244	1.83333	1.21314			2.45353	2.66186	5.57532					0.000829016	0.000133957	7.12481e-05	0.00034474		3.09904e-06	2.81224e-06	3.70135e-06	3.20421e-06		107.59
NM_001113517	763	1294	1845	1372	1503.67		1983	2352	3979	2771.33				1.69594	2.41809	1.79817			2.59895	3.08257	5.21494					0.000793235	0.000176683	0.000105607	0.000358508		3.28273e-06	3.25672e-06	3.4621e-06	3.33385e-06		107.536
NM_001113358	94	605	869	644	706		1060	827	2055	1314				6.43617	9.24468	6.85106			11.2766	8.79787	21.8617					0.00301037	0.000675484	0.000402365	0.00136274		1.42434e-05	9.2949e-06	1.45136e-05	1.2684e-05		107.438
NM_011765	527	185	148	94	142.333		187	419	420	342				0.351044	0.280835	0.178368			0.354839	0.795066	0.796964					0.000164193	2.05199e-05	1.04756e-05	6.50627e-05		4.48196e-07	8.39983e-07	5.29089e-07	6.05756e-07		107.407
NM_007414	343	421	549	416	462		428	730	1698	952				1.22741	1.60058	1.21283			1.24781	2.12828	4.95044					0.00057409	0.00011695	7.12297e-05	0.00025409		1.57611e-06	2.24851e-06	3.2865e-06	2.37038e-06		107.194
NM_021511	346	194	199	149	180.667		370	178	619	389				0.560694	0.575145	0.430636			1.06936	0.514451	1.78902					0.000262251	4.20243e-05	2.52914e-05	0.000109856		1.35071e-06	5.43514e-07	1.18769e-06	1.02731e-06		106.936
NM_011611	270	204	136	104	148		385	304	356	348.333				0.755556	0.503704	0.385185			1.42593	1.12593	1.31852					0.000353394	3.68043e-05	2.2622e-05	0.000137607		1.80108e-06	1.18953e-06	8.75339e-07	1.28865e-06		106.783
NM_027862	142	809	1442	986	1079		1214	1274	3310	1932.67				5.69718	10.1549	6.94366			8.5493	8.97183	23.3099					0.00266473	0.000741994	0.000407803	0.00127151		1.07986e-05	9.47868e-06	1.5475e-05	1.19174e-05		106.693
NM_001004143	506	475	522	390	462.333		608	844	1505	985.667				0.938735	1.03162	0.770751			1.20158	1.66798	2.97431					0.000439072	7.53778e-05	4.52664e-05	0.000186572		1.51771e-06	1.76222e-06	1.97459e-06	1.75151e-06		106.521
NM_181280	355	309	354	358	340.333		413	445	1214	690.667				0.870423	0.997183	1.00845			1.16338	1.25352	3.41972					0.00040712	7.28615e-05	5.92266e-05	0.000179736		1.46946e-06	1.32434e-06	2.27029e-06	1.68803e-06		106.477
NM_025668	207	1274	1605	814	1231		1469	2631	3789	2629.67				6.15459	7.75362	3.93237			7.09662	12.7101	18.3043					0.00287867	0.000566537	0.000230949	0.00122538		8.96373e-06	1.34282e-05	1.21519e-05	1.15146e-05		106.42
NM_153580	186	122	160	137	139.667		199	194	400	264.333				0.655914	0.860215	0.736559			1.06989	1.04301	2.15054					0.000306789	6.28536e-05	4.32583e-05	0.000137634		1.35138e-06	1.10193e-06	1.4277e-06	1.29367e-06		106.39
NM_010888	97	182	298	222	234		203	295	849	449				1.87629	3.07216	2.28866			2.09278	3.04124	8.75258					0.000877591	0.000224475	0.000134414	0.00041216		2.64339e-06	3.21305e-06	5.81067e-06	3.88904e-06		105.98
NM_008012	297	665	1011	743	806.333		694	1178	2903	1591.67				2.23906	3.40404	2.50168			2.3367	3.96633	9.77441					0.00104727	0.000248724	0.000146925	0.000480972		2.95148e-06	4.1904e-06	6.48905e-06	4.54364e-06		105.856
NM_018858	168	459	594	504	519		890	695	1295	960				2.73214	3.53571	3			5.29762	4.1369	7.70833					0.0012779	0.000258345	0.000176191	0.000570811		6.69141e-06	4.37061e-06	5.11742e-06	5.39315e-06		105.84
NM_008037	307	167	296	328	263.667		119	298	993	470				0.543974	0.964169	1.0684			0.387622	0.970684	3.23453					0.000254431	7.04493e-05	6.27476e-05	0.000129209		4.89605e-07	1.02552e-06	2.14734e-06	1.22082e-06		105.838
NM_007393	356	174279	240995	186203	200492		287042	228119	658354	391172				489.548	676.952	523.042			806.298	640.784	1849.31					0.228975	0.0494631	0.0307184	0.103052		0.00101843	0.000676984	0.00122772	0.00097438		105.762
NM_153799	489	130	154	115	133		242	185	370	265.667				0.265849	0.314928	0.235174			0.494888	0.378323	0.756646					0.000124345	2.3011e-05	1.38118e-05	5.37225e-05		6.25092e-07	3.99696e-07	5.02323e-07	5.09037e-07		105.537
NM_007898	211	375	503	336	404.667		503	652	1317	824				1.77725	2.38389	1.59242			2.38389	3.09005	6.24171					0.000831268	0.000174184	9.35231e-05	0.000366325		3.01108e-06	3.26462e-06	4.14375e-06	3.47315e-06		105.473
NM_007536	153	263	551	273	362.333		471	496	876	614.333				1.71895	3.60131	1.78431			3.07843	3.24183	5.72549					0.000804001	0.000263138	0.000104793	0.000390644		3.88836e-06	3.42497e-06	3.80104e-06	3.70479e-06		105.443
NM_001005358	527	164	135	87	128.667		168	375	394	312.333				0.311195	0.256167	0.165085			0.318786	0.711575	0.747628					0.000145554	1.87174e-05	9.69551e-06	5.79891e-05		4.02658e-07	7.51775e-07	4.96336e-07	5.50256e-07		105.386
NM_001045523	753	172	243	194	203		244	268	677	396.333				0.22842	0.322709	0.257636			0.324037	0.35591	0.89907					0.000106838	2.35795e-05	1.5131e-05	4.85162e-05		4.09291e-07	3.76016e-07	5.96876e-07	4.60728e-07		105.303
NM_018753	227	1310	2056	1240	1535.33		2574	2403	3241	2739.33				5.77093	9.05727	5.46256			11.3392	10.5859	14.2775					0.00269922	0.000661791	0.000320817	0.00122727		1.43225e-05	1.11839e-05	9.47858e-06	1.16617e-05		105.24
NM_013563	350	1779	1746	1655	1726.67		2656	2463	6172	3763.67				5.08286	4.98857	4.72857			7.58857	7.03714	17.6343					0.00237739	0.000364502	0.00027771	0.00100653		9.58511e-06	7.4347e-06	1.17071e-05	9.57563e-06		105.114
NM_001113486	564	900	1143	661	901.333		1105	1341	3551	1999				1.59574	2.0266	1.17199			1.95922	2.37766	6.2961					0.000746373	0.000148078	6.8831e-05	0.000321094		2.47469e-06	2.51198e-06	4.17986e-06	3.05551e-06		105.087
NM_024290	157	124	216	131	157		177	239	451	289				0.789809	1.3758	0.834395			1.12739	1.52229	2.87261					0.000369415	0.000100526	4.90042e-05	0.000172982		1.424e-06	1.60829e-06	1.90707e-06	1.64646e-06		105.063
NM_133346	399	108	129	140	125.667		160	197	361	239.333				0.270677	0.323308	0.350877			0.401003	0.493734	0.904762					0.000126603	2.36233e-05	2.06071e-05	5.69444e-05		5.06506e-07	5.21627e-07	6.00654e-07	5.42929e-07		104.884
NM_001163746	482	151	191	138	160		149	317	547	337.667				0.313278	0.396266	0.286307			0.309129	0.657676	1.13485					0.000146529	2.89541e-05	1.68149e-05	6.40992e-05		3.9046e-07	6.94831e-07	7.53409e-07	6.129e-07		104.583
NM_007451	279	3535	4516	3202	3751		3919	6195	13989	8034.33				12.6703	16.1864	11.4767			14.0466	22.2043	50.1398					0.00592622	0.0011827	0.00067403	0.00259431		1.77422e-05	2.34587e-05	3.32869e-05	2.48293e-05		104.486
NM_026919	60	342	489	279	370		347	627	1400	791.333				5.7	8.15	4.65			5.78333	10.45	23.3333					0.00266604	0.000595499	0.000273096	0.00117821		7.30492e-06	1.10404e-05	1.54906e-05	1.12786e-05		104.464
NM_013515	265	1318	1488	847	1217.67		2777	1715	3169	2553.67				4.97358	5.61509	3.19623			10.4792	6.4717	11.9585					0.00232628	0.00041028	0.000187715	0.000974758		1.32363e-05	6.83731e-06	7.93901e-06	9.33755e-06		104.391
NM_001033966	220	228	404	282	304.667		478	316	794	529.333				1.03636	1.83636	1.28182			2.17273	1.43636	3.60909					0.000484735	0.000134178	7.52815e-05	0.000231398		2.74437e-06	1.51751e-06	2.39601e-06	2.21929e-06		104.267
NM_011926	322	167	170	68	135		203	372	388	321				0.518634	0.52795	0.21118			0.630435	1.15528	1.20497					0.000242579	3.85759e-05	1.24027e-05	9.78525e-05		7.96301e-07	1.22055e-06	7.99956e-07	9.38934e-07		104.217
NM_001253715	174	65	176	152	131		94	153	332	193				0.373563	1.01149	0.873563			0.54023	0.87931	1.90805					0.000174726	7.39072e-05	5.13046e-05	9.99791e-05		6.82363e-07	9.28986e-07	1.26672e-06	9.59355e-07		104.215
NM_008323	374	575	856	701	710.667		636	1101	2426	1387.67				1.53743	2.28877	1.87433			1.70053	2.94385	6.48663					0.000719099	0.000167234	0.00011008	0.000332138		2.14794e-06	3.11016e-06	4.30635e-06	3.18815e-06		104.179
NM_001017959	396	6107	7480	5114	6233.67		6139	12790	21570	13499.7				15.4217	18.8889	12.9141			15.5025	32.298	54.4697					0.00721315	0.00138016	0.000758451	0.00311725		1.95812e-05	3.41226e-05	3.61614e-05	2.99551e-05		104.064
NM_001113487	557	900	1145	664	903		1107	1355	3609	2023.67				1.6158	2.05566	1.1921			1.98743	2.43268	6.47935					0.000755753	0.000150201	7.00124e-05	0.000325322		2.51032e-06	2.57011e-06	4.30152e-06	3.12732e-06		104.026
NM_019781	357	233	219	158	203.333		234	350	942	508.667				0.652661	0.613445	0.442577			0.655462	0.980392	2.63866					0.000305267	4.48228e-05	2.59927e-05	0.000125361		8.27913e-07	1.03578e-06	1.75175e-06	1.20515e-06		104.021
NM_010813	572	89	115	97	100.333		149	143	296	196				0.155594	0.201049	0.16958			0.26049	0.25	0.517483					7.27757e-05	1.46901e-05	9.9595e-06	3.24751e-05		3.29024e-07	2.64123e-07	3.43547e-07	3.12231e-07		104.01
NM_009890	279	952	370	179	500.333		2392	881	1046	1439.67				3.41219	1.32616	0.641577			8.57348	3.15771	3.7491					0.00159597	9.68994e-05	3.768e-05	0.00057685		1.08291e-05	3.3361e-06	2.48896e-06	5.5514e-06		103.911
NM_026610	110	511	720	525	585.333		488	939	2254	1227				4.64545	6.54545	4.77273			4.43636	8.53636	20.4909					0.0021728	0.000478259	0.000280303	0.000977122		5.60356e-06	9.01862e-06	1.36035e-05	9.40857e-06		103.854
NM_146165	261	168	313	195	225.333		235	343	645	407.667				0.643678	1.19923	0.747126			0.900383	1.31418	2.47126					0.000301066	8.76249e-05	4.38789e-05	0.00014419		1.13727e-06	1.38842e-06	1.64063e-06	1.38877e-06		103.825
NM_012060	226	1688	1996	1483	1722.33		1311	3161	7310	3927.33				7.46903	8.83186	6.56195			5.80088	13.9867	32.3451					0.00349346	0.000645321	0.000385385	0.00150806		7.32709e-06	1.47769e-05	2.14733e-05	1.45258e-05		103.819
NM_011579	396	298	240	140	226		513	452	701	555.333				0.752525	0.606061	0.353535			1.29545	1.14141	1.7702					0.000351976	4.42833e-05	2.07632e-05	0.000139008		1.63629e-06	1.2059e-06	1.1752e-06	1.33913e-06		103.804
NM_030098	134	86	144	109	113		129	156	336	207				0.641791	1.07463	0.813433			0.962687	1.16418	2.50746					0.000300183	7.85202e-05	4.77731e-05	0.000142159		1.21597e-06	1.22995e-06	1.66466e-06	1.37019e-06		103.751
NM_031178	1013	234	205	210	216.333		538	280	518	445.333				0.230997	0.202369	0.207305			0.531096	0.276407	0.511352					0.000108044	1.47866e-05	1.21751e-05	4.50017e-05		6.70826e-07	2.92022e-07	3.39477e-07	4.34108e-07		103.665
NM_170704	203	147	112	87	115.333		312	228	237	259				0.724138	0.551724	0.428571			1.53695	1.12315	1.16749					0.000338699	4.0313e-05	2.51701e-05	0.000134727		1.94131e-06	1.1866e-06	7.75073e-07	1.301e-06		103.557
NM_026695	236	334	564	473	457		514	486	1525	841.667				1.41525	2.38983	2.00424			2.17797	2.05932	6.46186					0.000661952	0.000174619	0.000117709	0.000318093		2.75099e-06	2.17566e-06	4.28991e-06	3.07219e-06		103.54
NM_001110101	76	75	157	129	120.333		82	138	412	210.667				0.986842	2.06579	1.69737			1.07895	1.81579	5.42105					0.000461573	0.000150942	9.96869e-05	0.0002374		1.36282e-06	1.91837e-06	3.59893e-06	2.29337e-06		103.516
NM_001164040	117	5460	2150	2330	3313.33		13340	2012	12858	9403.33				46.6667	18.3761	19.9145			114.017	17.1966	109.897					0.0218273	0.00134269	0.00116959	0.00811318		0.000144015	1.81681e-05	7.29588e-05	7.83806e-05		103.51
NM_008529	117	5460	2150	2330	3313.33		13340	2012	12858	9403.33				46.6667	18.3761	19.9145			114.017	17.1966	109.897					0.0218273	0.00134269	0.00116959	0.00811318		0.000144015	1.81681e-05	7.29588e-05	7.83806e-05		103.51
NM_001164037	117	5460	2150	2330	3313.33		13340	2012	12858	9403.33				46.6667	18.3761	19.9145			114.017	17.1966	109.897					0.0218273	0.00134269	0.00116959	0.00811318		0.000144015	1.81681e-05	7.29588e-05	7.83806e-05		103.51
NM_001164036	117	5460	2150	2330	3313.33		13340	2012	12858	9403.33				46.6667	18.3761	19.9145			114.017	17.1966	109.897					0.0218273	0.00134269	0.00116959	0.00811318		0.000144015	1.81681e-05	7.29588e-05	7.83806e-05		103.51
NM_001164039	117	5460	2150	2330	3313.33		13340	2012	12858	9403.33				46.6667	18.3761	19.9145			114.017	17.1966	109.897					0.0218273	0.00134269	0.00116959	0.00811318		0.000144015	1.81681e-05	7.29588e-05	7.83806e-05		103.51
NM_001164038	117	5460	2150	2330	3313.33		13340	2012	12858	9403.33				46.6667	18.3761	19.9145			114.017	17.1966	109.897					0.0218273	0.00134269	0.00116959	0.00811318		0.000144015	1.81681e-05	7.29588e-05	7.83806e-05		103.51
NM_026393	290	106	149	149	134.667		157	249	313	239.667				0.365517	0.513793	0.513793			0.541379	0.858621	1.07931					0.000170962	3.75415e-05	3.01752e-05	7.95596e-05		6.83815e-07	9.07128e-07	7.16534e-07	7.69159e-07		103.437
NM_025364	191	519	563	369	483.667		818	880	1502	1066.67				2.71728	2.94764	1.93194			4.28272	4.60733	7.86387					0.00127094	0.000215377	0.000113463	0.000533261		5.4095e-06	4.86762e-06	5.22068e-06	5.16593e-06		103.227
NM_013587	341	1360	1734	1359	1484.33		2221	1841	5163	3075				3.98827	5.08504	3.98534			6.5132	5.39883	15.1408					0.00186542	0.000371551	0.00023406	0.000823677		8.22681e-06	5.70383e-06	1.00517e-05	7.9941e-06		103.036
NM_026141	473	229	249	182	220		296	372	835	501				0.484144	0.526427	0.384778			0.625793	0.786469	1.76533					0.000226447	3.84646e-05	2.25981e-05	9.58366e-05		7.90438e-07	8.309e-07	1.17197e-06	9.31102e-07		102.928
NM_008478	1240	293	337	274	301.333		439	465	1028	644				0.23629	0.271774	0.220968			0.354032	0.375	0.829032					0.000110519	1.98578e-05	1.29775e-05	4.77849e-05		4.47178e-07	3.96185e-07	5.50379e-07	4.64581e-07		102.856
NM_029985	402	100	133	88	107		176	173	293	214				0.248756	0.330846	0.218905			0.437811	0.430348	0.728856					0.00011635	2.4174e-05	1.28564e-05	5.11268e-05		5.52998e-07	4.5466e-07	4.83873e-07	4.97177e-07		102.834
NM_001177787	445	5298	8745	6351	6798		7531	10018	20852	12800.3				11.9056	19.6517	14.2719			16.9236	22.5124	46.8584					0.00556858	0.0014359	0.000838193	0.00261422		2.13762e-05	2.37842e-05	3.11084e-05	2.54229e-05		102.829
NM_001163395	380	403	1210	801	804.667		674	876	2073	1207.67				1.06053	3.18421	2.10789			1.77368	2.30526	5.45526					0.000496037	0.000232662	0.000123797	0.000284165		2.24034e-06	2.4355e-06	3.62165e-06	2.76583e-06		102.742
NM_017402	627	1459	1959	1365	1594.33		1851	2886	5166	3301				2.32695	3.1244	2.17703			2.95215	4.60287	8.23923					0.00108838	0.000228292	0.000127858	0.000481509		3.72886e-06	4.8629e-06	5.46987e-06	4.68721e-06		102.728
NM_019869	650	284	446	438	389.333		345	610	1178	711				0.436923	0.686154	0.673846			0.530769	0.938462	1.81231					0.000204361	5.01355e-05	3.95752e-05	9.80238e-05		6.70414e-07	9.91479e-07	1.20316e-06	9.55016e-07		102.641
NM_011150	558	8125	5733	3601	5819.67		17996	8870	16681	14515.7				14.5609	10.2742	6.45341			32.2509	15.8961	29.8943					0.00681054	0.000750708	0.00037901	0.00264675		4.07361e-05	1.67941e-05	1.98462e-05	2.57921e-05		102.619
NM_001177786	479	5298	8748	6355	6800.33		7541	10045	20903	12829.7				11.0605	18.263	13.2672			15.7432	20.9708	43.6388					0.00517331	0.00133443	0.000779187	0.00242898		1.98852e-05	2.21555e-05	2.8971e-05	2.36706e-05		102.616
NM_001039150	561	5310	8753	6364	6809		7565	10066	20943	12858				9.46524	15.6025	11.344			13.4848	17.943	37.3316					0.00442715	0.00114003	0.000666238	0.00207781		1.70327e-05	1.89566e-05	2.47837e-05	2.02577e-05		102.569
NM_001177785	638	5310	8760	6368	6812.67		7575	10068	20943	12862				8.32288	13.7304	9.98119			11.873	15.7806	32.826					0.00389284	0.00100324	0.000586198	0.00182743		1.49968e-05	1.66721e-05	2.17926e-05	1.78205e-05		102.546
NM_009851	761	5310	8761	6371	6814		7578	10065	20947	12863.3				6.97766	11.5125	8.37188			9.95795	13.226	27.5256					0.00326364	0.000841187	0.000491683	0.00153217		1.25779e-05	1.39732e-05	1.82737e-05	1.49416e-05		102.544
NM_007965	374	400	1204	784	796		674	872	2050	1198.67				1.06952	3.21925	2.09626			1.80214	2.33155	5.48128					0.000500243	0.000235222	0.000123114	0.000286193		2.27628e-06	2.46327e-06	3.63892e-06	2.79282e-06		102.474
NM_025845	523	247	220	141	202.667		489	311	631	477				0.472275	0.42065	0.269598			0.93499	0.594646	1.2065					0.000220896	3.07358e-05	1.58336e-05	8.91551e-05		1.18098e-06	6.2824e-07	8.00973e-07	8.70066e-07		102.469
NM_009855	287	79	185	107	123.667		85	209	340	211.333				0.275261	0.644599	0.372822			0.296167	0.728223	1.18467					0.000128747	4.70992e-05	2.18959e-05	6.59141e-05		3.74088e-07	7.69363e-07	7.86479e-07	6.4331e-07		102.461
NM_007807	551	3949	3632	2758	3446.33		7533	5885	9741	7719.67				7.16697	6.59165	5.00544			13.6715	10.6806	17.6788					0.00335218	0.000481635	0.000293971	0.00137593		1.72685e-05	1.1284e-05	1.17366e-05	1.34297e-05		102.454
NM_029804	710	1003	1767	1385	1385		1838	2159	3061	2352.67				1.41268	2.48873	1.9507			2.58873	3.04085	4.31127					0.000660747	0.000181845	0.000114565	0.000319052		3.26982e-06	3.21263e-06	2.86217e-06	3.11488e-06		102.429
NM_001109913	671	952	1718	1348	1339.33		1789	2055	2892	2245.33				1.41878	2.56036	2.00894			2.66617	3.06259	4.30999					0.000663601	0.000187079	0.000117986	0.000322888		3.36763e-06	3.23561e-06	2.86132e-06	3.15485e-06		102.346
NM_172398	297	345	556	478	459.667		518	614	1424	852				1.16162	1.87205	1.60943			1.74411	2.06734	4.79461					0.000543319	0.000136786	9.45221e-05	0.000258209		2.20298e-06	2.18413e-06	3.18305e-06	2.52339e-06		102.326
NM_016895	213	228	400	283	303.667		491	319	805	538.333				1.07042	1.87793	1.32864			2.30516	1.49765	3.77934					0.000500665	0.000137216	7.80313e-05	0.000238637		2.91165e-06	1.58226e-06	2.50903e-06	2.33431e-06		102.23
NM_025577	150	237	266	276	259.667		385	175	1152	570.667				1.58	1.77333	1.84			2.56667	1.16667	7.68					0.000739008	0.000129573	0.000108064	0.000325548		3.24195e-06	1.23258e-06	5.09861e-06	3.19104e-06		102.019
NM_175001	187	111	245	221	192.333		114	220	656	330				0.593583	1.31016	1.18182			0.609626	1.17647	3.50802					0.000277635	9.573e-05	6.94085e-05	0.000147591		7.70017e-07	1.24293e-06	2.32891e-06	1.44729e-06		101.978
NM_009391	197	2179	3098	2460	2579		3185	3923	8284	5130.67				11.0609	15.7259	12.4873			16.1675	19.9137	42.0508					0.00517349	0.00114905	0.000733383	0.00235197		2.04212e-05	2.10387e-05	2.79167e-05	2.31255e-05		101.705
NM_198831	192	305	248	207	253.333		343	352	1352	682.333				1.58854	1.29167	1.07812			1.78646	1.83333	7.04167					0.000743004	9.43787e-05	6.33186e-05	0.000300234		2.25647e-06	1.93691e-06	4.67483e-06	2.95607e-06		101.565
NM_011793	70	191	179	160	176.667		200	356	713	423				2.72857	2.55714	2.28571			2.85714	5.08571	10.1857					0.00127623	0.000186844	0.000134241	0.000532437		3.60885e-06	5.37303e-06	6.7621e-06	5.24799e-06		101.455
NM_001038231	70	191	179	160	176.667		200	356	713	423				2.72857	2.55714	2.28571			2.85714	5.08571	10.1857					0.00127623	0.000186844	0.000134241	0.000532437		3.60885e-06	5.37303e-06	6.7621e-06	5.24799e-06		101.455
NM_009447	429	481	382	411	424.667		662	568	1953	1061				1.12121	0.890443	0.958042			1.54312	1.32401	4.55245					0.000524421	6.50623e-05	5.6266e-05	0.00021525		1.94912e-06	1.39881e-06	3.02228e-06	2.1234e-06		101.37
NM_145384	274	249	248	163	220		246	495	888	543				0.908759	0.905109	0.594891			0.89781	1.80657	3.24088					0.000425051	6.6134e-05	3.49381e-05	0.000175374		1.13402e-06	1.90863e-06	2.15156e-06	1.7314e-06		101.29
NM_001177965	206	123	195	157	158.333		179	190	562	310.333				0.597087	0.946602	0.762136			0.868932	0.92233	2.72816					0.000279274	6.91657e-05	4.47604e-05	0.000131067		1.09755e-06	9.74436e-07	1.81117e-06	1.29438e-06		101.258
NM_001029979	972	402	355	318	358.333		854	516	1016	795.333				0.41358	0.365226	0.32716			0.878601	0.530864	1.04527					0.000193443	2.66861e-05	1.92142e-05	7.9781e-05		1.10976e-06	5.60855e-07	6.93933e-07	7.88182e-07		101.221
NM_001163394	395	446	1253	835	844.667		721	926	2352	1333				1.12911	3.17215	2.11392			1.82532	2.3443	5.95443					0.000528117	0.000231781	0.000124151	0.000294683		2.30555e-06	2.47674e-06	3.95303e-06	2.91178e-06		101.204
NM_144923	187	593	993	708	764.667		1090	1113	1989	1397.33				3.17112	5.31016	3.7861			5.82888	5.95187	10.6364					0.00148322	0.000387999	0.000222358	0.000697859		7.36244e-06	6.28812e-06	7.06128e-06	6.90395e-06		101.081
NM_007952	486	6857	8735	4900	6830.67		10996	14762	17205	14321				14.1091	17.9733	10.0823			22.6255	30.3745	35.4012					0.00659918	0.00131326	0.000592136	0.00283486		2.85782e-05	3.20905e-05	2.35022e-05	2.8057e-05		101.039
NM_029869	469	134	111	110	118.333		169	229	467	288.333				0.285714	0.236674	0.234542			0.360341	0.488273	0.995736					0.000133636	1.72931e-05	1.37747e-05	5.49014e-05		4.55146e-07	5.15857e-07	6.6105e-07	5.44018e-07		100.918
NM_022331	372	292	240	172	234.667		557	457	665	559.667				0.784946	0.645161	0.462366			1.49731	1.22849	1.78763					0.00036714	4.71402e-05	2.71548e-05	0.000147145		1.89125e-06	1.2979e-06	1.18678e-06	1.45864e-06		100.878
NM_181279	401	309	357	359	341.667		431	476	1287	731.333				0.770574	0.890274	0.895262			1.07481	1.18703	3.20948					0.000360418	6.505e-05	5.2579e-05	0.000159349		1.35759e-06	1.25409e-06	2.13071e-06	1.5808e-06		100.803
NM_001252472	121	1269	1346	742	1119		2480	1844	3350	2558				10.4876	11.124	6.13223			20.4959	15.2397	27.686					0.00490533	0.000812799	0.000360147	0.00202609		2.58883e-05	1.61006e-05	1.83802e-05	2.0123e-05		100.685
NM_001252443	329	351	824	617	597.333		252	1038	1768	1019.33				1.06687	2.50456	1.87538			0.765957	3.15502	5.37386					0.000499003	0.000183002	0.000110142	0.000264049		9.6748e-07	3.33325e-06	3.5676e-06	2.62278e-06		100.675
NM_026445	289	135	167	132	144.667		205	197	540	314				0.467128	0.577855	0.456747			0.709343	0.681661	1.86851					0.000218488	4.22223e-05	2.68249e-05	9.58452e-05		8.95969e-07	7.20171e-07	1.24047e-06	9.52203e-07		100.656
NM_172965	1037	217	351	304	290.667		410	338	852	533.333				0.209257	0.338476	0.293153			0.395371	0.32594	0.821601					9.78753e-05	2.47316e-05	1.7217e-05	4.6608e-05		4.99393e-07	3.44354e-07	5.45445e-07	4.63064e-07		100.651
NM_029017	233	158	153	118	143		131	272	696	366.333				0.678112	0.656652	0.506438			0.562232	1.16738	2.98712					0.000317171	4.79799e-05	2.97432e-05	0.000131631		7.10154e-07	1.23333e-06	1.9831e-06	1.30886e-06		100.569
NM_009125	1267	148	329	273	250		289	267	663	406.333				0.116811	0.259669	0.21547			0.228098	0.210734	0.523283					5.46358e-05	1.89733e-05	1.26546e-05	2.87546e-05		2.8811e-07	2.22639e-07	3.47398e-07	2.86049e-07		100.523
NM_025378	118	8138	5289	4849	6092		10583	11502	28658	16914.3				68.9661	44.822	41.0932			89.6864	97.4746	242.864					0.0322573	0.00327503	0.00241342	0.0126486		0.000113283	0.000102981	0.000161233	0.000125832		100.519
NM_010485	307	619	1117	733	823		748	1337	2665	1583.33				2.01629	3.63844	2.38762			2.43648	4.35505	8.68078					0.000943071	0.000265851	0.000140226	0.000449716		3.07752e-06	4.60108e-06	5.76301e-06	4.48054e-06		100.371
NM_133358	540	91	150	131	124		181	174	298	217.667				0.168519	0.277778	0.242593			0.335185	0.322222	0.551852					7.88206e-05	2.02965e-05	1.42475e-05	3.77882e-05		4.23372e-07	3.40426e-07	3.66364e-07	3.76721e-07		100.308
NM_007687	147	13468	16320	11520	13769.3		22973	18878	48970	30273.7				91.619	111.02	78.3673			156.279	128.422	333.129					0.0428527	0.00811197	0.00460253	0.0185224		0.000197396	0.000135677	0.000221158	0.000184744		100.26
NM_001172146	301	174	339	222	245		270	369	690	443				0.578073	1.12625	0.737542			0.89701	1.22591	2.29236					0.00027038	8.22918e-05	4.3316e-05	0.000131996		1.13301e-06	1.29517e-06	1.52185e-06	1.31668e-06		100.249
NM_009906	543	2024	3013	2057	2364.67		4324	3552	5491	4455.67				3.72744	5.5488	3.78821			7.96317	6.54144	10.1123					0.00174342	0.000405436	0.000222483	0.000790448		1.00583e-05	6.91099e-06	6.71339e-06	7.89421e-06		100.13
NM_026735	197	236	197	138	190.333		329	397	743	489.667				1.19797	1	0.700508			1.67005	2.01523	3.77157					0.000560323	7.30674e-05	4.1141e-05	0.000224844		2.10944e-06	2.12908e-06	2.50388e-06	2.24746e-06		100.043
NM_025567	306	459	495	458	470.667		871	827	1213	970.333				1.5	1.61765	1.49673			2.84641	2.70261	3.96405					0.00070159	0.000118197	8.79034e-05	0.000302564		3.59529e-06	2.8553e-06	2.63166e-06	3.02741e-06		99.9413
NM_133906	542	151	124	113	129.333		219	251	485	318.333				0.278598	0.228782	0.208487			0.404059	0.4631	0.894834					0.000130308	1.67165e-05	1.22445e-05	5.30896e-05		5.10366e-07	4.89262e-07	5.94063e-07	5.31231e-07		99.937
NM_021439	333	107	247	200	184.667		102	276	571	316.333				0.321321	0.741742	0.600601			0.306306	0.828829	1.71471					0.000150291	5.41971e-05	3.52734e-05	7.99204e-05		3.86895e-07	8.75653e-07	1.13837e-06	8.00305e-07		99.8624
NM_023210	241	463	723	486	557.333		704	941	1657	1100.67				1.92116	3	2.0166			2.92116	3.90456	6.87552					0.000898579	0.000219202	0.000118435	0.000412072		3.68971e-06	4.12515e-06	4.56453e-06	4.12646e-06		99.8609
NM_010807	181	285	240	301	275.333		498	418	930	615.333				1.57459	1.32597	1.66298			2.75138	2.30939	5.13812					0.000736476	9.68849e-05	9.76674e-05	0.000310343		3.47527e-06	2.43986e-06	3.4111e-06	3.10874e-06		99.8291
NM_009982	443	7510	5790	4470	5923.33		11259	12556	21979	15264.7				16.9526	13.07	10.0903			25.4153	28.3431	49.614					0.00792918	0.000954989	0.000592605	0.00315893		3.21021e-05	2.99443e-05	3.29378e-05	3.16614e-05		99.7722
NM_001037761	258	1426	3008	1930	2121.33		3224	2111	5606	3647				5.52713	11.6589	7.48062			12.4961	8.18217	21.7287					0.00258519	0.000851886	0.000439339	0.00129214		1.57838e-05	8.64441e-06	1.44253e-05	1.29512e-05		99.77
NM_019639	715	85269	130797	108493	108186		211896	109239	265867	195667				119.257	182.933	151.738			296.358	152.782	371.842					0.0557799	0.0133664	0.00891164	0.0260193		0.000374329	0.000161413	0.000246859	0.000260867		99.7416
NM_027320	267	327	494	288	369.667		699	487	1006	730.667				1.22472	1.85019	1.07865			2.61798	1.82397	3.76779					0.000572834	0.000135188	6.33495e-05	0.000257124		3.30676e-06	1.92701e-06	2.50136e-06	2.57838e-06		99.723
NM_001195298	655	223	417	384	341.333		386	463	907	585.333				0.340458	0.636641	0.58626			0.589313	0.70687	1.38473					0.000159241	4.65177e-05	3.44312e-05	8.00634e-05		7.4436e-07	7.46804e-07	9.19298e-07	8.03487e-07		99.6449
NM_001161731	126	114	111	103	109.333		182	200	358	246.667				0.904762	0.880952	0.81746			1.44444	1.5873	2.84127					0.000423181	6.43689e-05	4.80097e-05	0.00017852		1.82448e-06	1.67697e-06	1.88627e-06	1.7959e-06		99.4039
NM_007447	126	114	111	103	109.333		182	200	358	246.667				0.904762	0.880952	0.81746			1.44444	1.5873	2.84127					0.000423181	6.43689e-05	4.80097e-05	0.00017852		1.82448e-06	1.67697e-06	1.88627e-06	1.7959e-06		99.4039
NM_001002842	656	69	157	80	102		152	131	238	173.667				0.105183	0.239329	0.121951			0.231707	0.199695	0.362805					4.91969e-05	1.74872e-05	7.16223e-06	2.46154e-05		2.92669e-07	2.10977e-07	2.40859e-07	2.48168e-07		99.1884
NM_001253731	615	311	405	266	327.333		507	489	1155	717				0.505691	0.658537	0.43252			0.82439	0.795122	1.87805					0.000236525	4.81175e-05	2.5402e-05	0.000103348		1.04129e-06	8.40041e-07	1.2468e-06	1.04271e-06		99.1151
NM_019955	467	327	500	383	403.333		405	624	1459	829.333				0.700214	1.07066	0.820128			0.867238	1.33619	3.1242					0.000327509	7.82306e-05	4.81664e-05	0.000151302		1.09541e-06	1.41167e-06	2.0741e-06	1.52706e-06		99.0806
NM_001198866	1245	792	953	746	830.333		1459	1438	2297	1731.33				0.636145	0.765462	0.599197			1.17189	1.15502	1.84498					0.000297542	5.59303e-05	3.5191e-05	0.000129554		1.48021e-06	1.22027e-06	1.22485e-06	1.30844e-06		99.0142
NM_001163396	382	426	1219	796	813.667		716	911	2286	1304.33				1.11518	3.1911	2.08377			1.87435	2.38482	5.98429					0.000521601	0.000233165	0.00012238	0.000292382		2.36748e-06	2.51954e-06	3.97286e-06	2.9533e-06		99.002
NM_001252089	369	417	641	530	529.333		881	781	1236	966				1.13008	1.73713	1.43631			2.38753	2.11653	3.34959					0.000528569	0.000126927	8.43551e-05	0.000246617		3.01569e-06	2.2361e-06	2.22373e-06	2.49184e-06		98.9699
NM_009033	369	417	641	530	529.333		881	781	1236	966				1.13008	1.73713	1.43631			2.38753	2.11653	3.34959					0.000528569	0.000126927	8.43551e-05	0.000246617		3.01569e-06	2.2361e-06	2.22373e-06	2.49184e-06		98.9699
NM_153053	405	634	783	818	745		882	1224	2496	1534				1.56543	1.93333	2.01975			2.17778	3.02222	6.16296					0.000732195	0.000141264	0.000118621	0.000330693		2.75075e-06	3.19296e-06	4.09147e-06	3.34506e-06		98.8601
NM_019870	216	114	195	144	151		192	178	512	294				0.527778	0.902778	0.666667			0.888889	0.824074	2.37037					0.000246856	6.59636e-05	3.91535e-05	0.000117324		1.12275e-06	8.70629e-07	1.57364e-06	1.18901e-06		98.674
NM_178045	303	385	274	199	286		626	518	1220	788				1.27063	0.90429	0.656766			2.06601	1.70957	4.0264					0.000594306	6.60741e-05	3.8572e-05	0.000232984		2.60957e-06	1.80615e-06	2.67305e-06	2.36292e-06		98.5999
NM_144846	305	1264	1603	904	1257		1702	2648	4197	2849				4.14426	5.25574	2.96393			5.58033	8.68197	13.7607					0.00193838	0.000384023	0.000174073	0.000832159		7.0485e-06	9.17245e-06	9.13544e-06	8.45213e-06		98.4556
NM_009080	126	3108	3645	2526	3093		5847	3037	12666	7183.33				24.6667	28.9286	20.0476			46.4048	24.1032	100.524					0.0115373	0.00211373	0.0011774	0.0049428		5.86138e-05	2.54649e-05	6.67358e-05	5.02715e-05		98.3221
NM_007835	1262	792	955	746	831		1466	1453	2317	1745.33				0.627575	0.756735	0.591125			1.16165	1.15135	1.83597					0.000293534	5.52927e-05	3.47169e-05	0.000127848		1.46728e-06	1.21639e-06	1.21887e-06	1.30085e-06		98.2806
NM_001253757	229	437	666	451	518		642	921	1598	1053.67				1.9083	2.9083	1.96943			2.80349	4.02183	6.97817					0.000892562	0.000212502	0.000115665	0.00040691		3.54109e-06	4.24904e-06	4.63267e-06	4.14093e-06		98.2651
NM_011936	483	285	275	259	273		545	448	835	609.333				0.590062	0.569358	0.536232			1.12836	0.927536	1.72878					0.000275988	4.16015e-05	3.1493e-05	0.000116361		1.42524e-06	9.79936e-07	1.1477e-06	1.18429e-06		98.2535
NM_145943	429	168	195	203	188.667		290	191	753	411.333				0.391608	0.454545	0.473193			0.675991	0.445221	1.75524					0.000183166	3.32124e-05	2.77908e-05	8.13897e-05		8.53843e-07	4.70374e-07	1.16527e-06	8.2983e-07		98.0799
NM_011076	1257	132	188	174	164.667		168	217	652	345.667				0.105012	0.149562	0.138425			0.133652	0.172633	0.518695					4.91169e-05	1.09281e-05	8.12972e-06	2.27249e-05		1.68815e-07	1.82386e-07	3.44352e-07	2.31851e-07		98.0152
NM_009798	253	1797	3501	2143	2480.33		3920	2736	6978	4544.67				7.10277	13.8379	8.47036			15.4941	10.8142	27.581					0.00332215	0.0010111	0.000497466	0.00161024		1.95705e-05	1.14252e-05	1.83105e-05	1.64354e-05		97.9739
NM_011287	198	1574	3009	2142	2241.67		3152	2476	6699	4109				7.94949	15.197	10.8182			15.9192	12.5051	33.8333					0.00371819	0.0011104	0.000635355	0.00182132		2.01075e-05	1.32115e-05	2.24613e-05	1.85934e-05		97.9548
NM_019640	252	329	407	224	320		474	615	1153	747.333				1.30556	1.61508	0.888889			1.88095	2.44048	4.5754					0.000610643	0.00011801	5.22047e-05	0.000260286		2.37583e-06	2.57835e-06	3.03752e-06	2.6639e-06		97.7086
NM_010220	437	338	257	236	277		462	549	1188	733				0.773455	0.588101	0.540046			1.05721	1.25629	2.71854					0.000361766	4.2971e-05	3.1717e-05	0.000145485		1.33536e-06	1.32727e-06	1.80478e-06	1.48914e-06		97.6973
NM_026282	182	68	138	150	118.667		111	89	429	209.667				0.373626	0.758242	0.824176			0.60989	0.489011	2.35714					0.000174755	5.54027e-05	4.84041e-05	9.2854e-05		7.70351e-07	5.16637e-07	1.56486e-06	9.50617e-07		97.6776
NM_001111291	673	2163	3365	2174	2567.33		3823	4165	7479	5155.67				3.21397	5	3.23031			5.68053	6.18871	11.1129					0.00150326	0.000365337	0.000189717	0.000686104		7.17507e-06	6.53833e-06	7.37766e-06	7.03036e-06		97.5917
NM_001111292	673	2163	3365	2174	2567.33		3823	4165	7479	5155.67				3.21397	5	3.23031			5.68053	6.18871	11.1129					0.00150326	0.000365337	0.000189717	0.000686104		7.17507e-06	6.53833e-06	7.37766e-06	7.03036e-06		97.5917
NM_011239	184	659	775	667	700.333		1308	919	2286	1504.33				3.58152	4.21196	3.625			7.1087	4.99457	12.4239					0.00167517	0.000307757	0.000212897	0.000731943		8.97898e-06	5.27673e-06	8.248e-06	7.50124e-06		97.5763
NM_001166629	94	665	1159	1010	944.667		1572	864	2672	1702.67				7.07447	12.3298	10.7447			16.7234	9.19149	28.4255					0.00330892	0.000900905	0.000631038	0.00161362		2.11233e-05	9.71075e-06	1.88712e-05	1.65684e-05		97.3914
NM_030597	112	99	180	149	142.667		119	179	544	280.667				0.883929	1.60714	1.33036			1.0625	1.59821	4.85714					0.000413437	0.00011743	7.81322e-05	0.000203		1.34204e-06	1.6885e-06	3.22456e-06	2.08504e-06		97.3602
NM_008486	947	4384	4276	2437	3699		8192	7507	11278	8992.33				4.62936	4.51531	2.57339			8.65048	7.92714	11.9092					0.00216527	0.000329922	0.000151136	0.000882111		1.09264e-05	8.37497e-06	7.90628e-06	9.06922e-06		97.2642
NM_001170333	243	384	889	353	542		635	874	1512	1007				1.58025	3.65844	1.45267			2.61317	3.59671	6.22222					0.000739124	0.000267312	8.5316e-05	0.000363917		3.30069e-06	3.7999e-06	4.13082e-06	3.7438e-06		97.2053
NM_194068	186	161	694	625	493.333		172	389	1576	712.333				0.865591	3.73118	3.36022			0.924731	2.0914	8.47312					0.00040486	0.000272628	0.000197346	0.000291611		1.16803e-06	2.20955e-06	5.62514e-06	3.00091e-06		97.1745
NM_011313	70	5305	7429	6380	6371.33		9693	7478	22360	13177				75.7857	106.129	91.1429			138.471	106.829	319.429					0.035447	0.00775454	0.00535284	0.0161848		0.000174903	0.000112864	0.000212063	0.00016661		97.1419
NM_021460	378	8155	8722	7537	8138		10568	16536	29515	18873				21.5741	23.0741	19.9392			27.9577	43.746	78.082					0.0100908	0.00168596	0.00117103	0.00431592		3.53133e-05	4.62174e-05	5.18372e-05	4.4456e-05		97.0831
NM_001111100	378	8155	8722	7537	8138		10568	16536	29515	18873				21.5741	23.0741	19.9392			27.9577	43.746	78.082					0.0100908	0.00168596	0.00117103	0.00431592		3.53133e-05	4.62174e-05	5.18372e-05	4.4456e-05		97.0831
NM_017382	197	1788	2801	1704	2097.67		3115	3383	6410	4302.67				9.07614	14.2183	8.64975			15.8122	17.1726	32.5381					0.00424516	0.00103889	0.000508002	0.00193068		1.99723e-05	1.81427e-05	2.16014e-05	1.99055e-05		96.9925
NM_001159745	247	165	248	229	214		314	301	614	409.667				0.668016	1.00405	0.927126			1.27126	1.21862	2.48583					0.000312449	7.33632e-05	5.44503e-05	0.000146754		1.60572e-06	1.28747e-06	1.6503e-06	1.51449e-06		96.8998
NM_001177647	272	4588	3222	2478	3429.33		6417	7097	15824	9779.33				16.8676	11.8456	9.11029			23.5919	26.0919	58.1765					0.00788945	0.000865526	0.00053505	0.00309668		2.97989e-05	2.75659e-05	3.86223e-05	3.19957e-05		96.7841
NM_201410	512	950	970	863	927.667		1405	1838	3217	2153.33				1.85547	1.89453	1.68555			2.74414	3.58984	6.2832					0.000867853	0.000138428	9.89926e-05	0.000368425		3.46612e-06	3.79265e-06	4.1713e-06	3.81002e-06		96.6988
NM_026911	142	814	979	708	833.667		899	1661	3347	1969				5.73239	6.89437	4.98592			6.33099	11.6972	23.5704					0.00268119	0.000503753	0.000292824	0.00115926		7.99666e-06	1.2358e-05	1.5648e-05	1.20009e-05		96.5978
NM_001111289	688	2164	3408	2233	2601.67		3926	4192	7587	5235				3.14535	4.95349	3.24564			5.7064	6.09302	11.0276					0.00147116	0.000361938	0.000190617	0.000674573		7.20774e-06	6.43724e-06	7.32103e-06	6.98867e-06		96.5239
NM_016739	688	2164	3408	2233	2601.67		3926	4192	7587	5235				3.14535	4.95349	3.24564			5.7064	6.09302	11.0276					0.00147116	0.000361938	0.000190617	0.000674573		7.20774e-06	6.43724e-06	7.32103e-06	6.98867e-06		96.5239
NM_133859	387	556	238	324	372.667		866	642	1963	1157				1.43669	0.614987	0.837209			2.23773	1.65891	5.07235					0.00067198	4.49355e-05	4.91695e-05	0.000255362		2.82647e-06	1.75263e-06	3.36744e-06	2.64885e-06		96.4048
NM_001101656	226	1523	1609	777	1303		2662	3014	3824	3166.67				6.73894	7.11947	3.43805			11.7788	13.3363	16.9204					0.00315198	0.000520201	0.000201918	0.00129137		1.48777e-05	1.40897e-05	1.12331e-05	1.34002e-05		96.3694
NM_001101657	226	1523	1609	777	1303		2662	3014	3824	3166.67				6.73894	7.11947	3.43805			11.7788	13.3363	16.9204					0.00315198	0.000520201	0.000201918	0.00129137		1.48777e-05	1.40897e-05	1.12331e-05	1.34002e-05		96.3694
NM_025898	276	693	827	689	736.333		835	1126	3270	1743.67				2.51087	2.99638	2.49638			3.02536	4.07971	11.8478					0.0011744	0.000218937	0.000146613	0.000513317		3.82133e-06	4.31019e-06	7.86555e-06	5.33236e-06		96.2646
NM_138596	116	168	194	118	160		201	284	726	403.667				1.44828	1.67241	1.01724			1.73276	2.44828	6.25862					0.000677398	0.000122199	5.97428e-05	0.000286446		2.18864e-06	2.58659e-06	4.15498e-06	2.97674e-06		96.2283
NM_145824	629	129	164	168	153.667		242	227	465	311.333				0.205087	0.260731	0.267091			0.384738	0.36089	0.739269					9.59249e-05	1.9051e-05	1.56863e-05	4.35541e-05		4.85962e-07	3.81278e-07	4.90786e-07	4.52675e-07		96.2147
NM_013701	514	933	934	839	902		1384	1808	3167	2119.67				1.81518	1.81712	1.6323			2.69261	3.51751	6.16148					0.000849006	0.000132772	9.58651e-05	0.000359214		3.40103e-06	3.71623e-06	4.09049e-06	3.73591e-06		96.1517
NM_027995	326	355	481	454	430		589	616	1469	891.333				1.08896	1.47546	1.39264			1.80675	1.88957	4.50613					0.000509334	0.000107808	8.179e-05	0.000232977		2.2821e-06	1.99632e-06	2.99154e-06	2.42332e-06		96.1398
NM_013672	762	611	715	647	657.667		701	1356	2400	1485.67				0.801837	0.93832	0.849081			0.919948	1.77953	3.14961					0.000375041	6.85606e-05	4.98668e-05	0.000164489		1.16198e-06	1.88006e-06	2.09096e-06	1.711e-06		96.1363
NM_201643	510	933	934	839	902		1385	1808	3167	2120				1.82941	1.83137	1.6451			2.71569	3.5451	6.2098					0.000855665	0.000133814	9.6617e-05	0.000362032		3.43018e-06	3.74537e-06	4.12257e-06	3.76604e-06		96.1306
NM_201645	516	933	935	839	902.333		1386	1808	3167	2120.33				1.80814	1.81202	1.62597			2.68605	3.50388	6.1376					0.000845715	0.000132399	9.54936e-05	0.000357869		3.39274e-06	3.70182e-06	4.07463e-06	3.72307e-06		96.1222
NM_026313	472	437	330	236	334.333		880	533	1277	896.667				0.925847	0.699153	0.5			1.86441	1.12924	2.70551					0.000433044	5.10852e-05	2.93651e-05	0.000171165		2.35493e-06	1.19303e-06	1.79614e-06	1.78137e-06		96.0862
NM_010186	385	1741	1994	1082	1605.67		3377	2890	5027	3764.67				4.52208	5.17922	2.81039			8.77143	7.50649	13.0571					0.0021151	0.000378432	0.000165055	0.000886195		1.10792e-05	7.93056e-06	8.66839e-06	9.22604e-06		96.0536
NM_008831	253	679	669	464	604		982	886	2899	1589				2.68379	2.64427	1.83399			3.88142	3.50198	11.4585					0.00125528	0.00019321	0.000107711	0.000518734		4.90262e-06	3.69982e-06	7.60708e-06	5.40317e-06		96.0055
NM_016760	217	1747	1879	1017	1547.67		4092	1783	5301	3725.33				8.05069	8.65899	4.68664			18.8571	8.21659	24.4286					0.00376552	0.000632689	0.000275247	0.00155782		2.38184e-05	8.68078e-06	1.62177e-05	1.6239e-05		95.9311
NM_001134427	90	151	142	90	127.667		138	338	555	343.667				1.67778	1.57778	1			1.53333	3.75556	6.16667					0.000784742	0.000115284	5.87303e-05	0.000319585		1.93675e-06	3.96772e-06	4.09393e-06	3.3328e-06		95.8909
NM_001080385	229	1747	1879	1017	1547.67		4092	1785	5308	3728.33				7.62882	8.20524	4.44105			17.869	7.79476	23.179					0.0035682	0.000599535	0.000260824	0.00147619		2.25703e-05	8.23512e-06	1.53881e-05	1.53978e-05		95.8698
NM_001111290	679	2069	3301	2160	2510		3809	4050	7311	5056.67				3.04713	4.86156	3.18115			5.60972	5.96465	10.7673					0.00142522	0.000355221	0.00018683	0.000655758		7.08563e-06	6.30162e-06	7.14821e-06	6.84515e-06		95.7989
NM_009018	232	226	302	284	270.667		309	412	1030	583.667				0.974138	1.30172	1.22414			1.3319	1.77586	4.43966					0.00045563	9.51136e-05	7.18939e-05	0.000207546		1.68232e-06	1.87619e-06	2.9474e-06	2.16864e-06		95.7035
NM_198193	232	226	302	284	270.667		309	412	1030	583.667				0.974138	1.30172	1.22414			1.3319	1.77586	4.43966					0.00045563	9.51136e-05	7.18939e-05	0.000207546		1.68232e-06	1.87619e-06	2.9474e-06	2.16864e-06		95.7035
NM_011738	227	2821	4109	2694	3208		3978	4591	13115	7228				12.4273	18.1013	11.8678			17.5242	20.2247	57.7753					0.00581259	0.00132262	0.000697001	0.00261074		2.21348e-05	2.13672e-05	3.83559e-05	2.7286e-05		95.6804
NM_001159301	303	1311	1635	875	1273.67		3550	1776	2777	2701				4.32673	5.39604	2.88779			11.7162	5.86139	9.16502					0.00202373	0.000394274	0.000169601	0.000862535		1.47987e-05	6.19252e-06	6.08448e-06	9.02523e-06		95.5693
NM_001033305	109	349	427	302	359.333		624	528	1317	823				3.20183	3.91743	2.77064			5.72477	4.84404	12.0826					0.00149758	0.000286236	0.000162721	0.000648847		7.23095e-06	5.1177e-06	8.02139e-06	6.79001e-06		95.5591
NM_001005506	535	378	462	373	404.333		682	502	1568	917.333				0.706542	0.863551	0.697196			1.27477	0.938318	2.93084					0.000330469	6.30974e-05	4.09465e-05	0.000144838		1.61016e-06	9.91327e-07	1.94573e-06	1.51574e-06		95.5558
NM_001199695	535	378	462	373	404.333		682	502	1568	917.333				0.706542	0.863551	0.697196			1.27477	0.938318	2.93084					0.000330469	6.30974e-05	4.09465e-05	0.000144838		1.61016e-06	9.91327e-07	1.94573e-06	1.51574e-06		95.5558
NM_133768	445	487	543	406	478.667		618	766	2200	1194.67				1.09438	1.22022	0.91236			1.38876	1.72135	4.94382					0.000511872	8.91586e-05	5.35831e-05	0.000218205		1.75415e-06	1.81859e-06	3.28211e-06	2.28495e-06		95.4964
NM_009278	396	1322	1570	981	1291		2271	2363	4407	3013.67				3.33838	3.96465	2.47727			5.73485	5.96717	11.1288					0.00156145	0.000289686	0.000145491	0.000665543		7.24368e-06	6.30428e-06	7.38819e-06	6.97872e-06		95.3675
NM_001110145	396	1322	1570	981	1291		2271	2363	4407	3013.67				3.33838	3.96465	2.47727			5.73485	5.96717	11.1288					0.00156145	0.000289686	0.000145491	0.000665543		7.24368e-06	6.30428e-06	7.38819e-06	6.97872e-06		95.3675
NM_001205313	736	2463	2745	1207	2138.33		4326	5040	6239	5201.67				3.34647	3.72962	1.63995			5.87772	6.84783	8.4769					0.00156523	0.000272513	9.63144e-05	0.000644687		7.42414e-06	7.23469e-06	5.62765e-06	6.76216e-06		95.3374
NM_029887	292	298	343	233	291.333		538	434	1102	691.333				1.02055	1.17466	0.797945			1.84247	1.4863	3.77397					0.000477338	8.58291e-05	4.68635e-05	0.000203343		2.32722e-06	1.57027e-06	2.50547e-06	2.13432e-06		95.2733
NM_001110201	289	298	343	233	291.333		539	434	1102	691.667				1.03114	1.18685	0.806228			1.86505	1.50173	3.81315					0.000482293	8.67201e-05	4.735e-05	0.000205454		2.35574e-06	1.58657e-06	2.53148e-06	2.15793e-06		95.209
NM_144844	705	160	221	179	186.667		273	307	599	393				0.22695	0.313475	0.253901			0.387234	0.435461	0.849645					0.000106151	2.29048e-05	1.49117e-05	4.79891e-05		4.89115e-07	4.60062e-07	5.64063e-07	5.04413e-07		95.1384
NM_144918	397	220	159	131	170		368	357	669	464.667				0.554156	0.400504	0.329975			0.926952	0.899244	1.68514					0.000259194	2.92638e-05	1.93795e-05	0.000102612		1.17083e-06	9.50046e-07	1.11873e-06	1.07987e-06		95.0229
NM_146112	1272	277	378	275	310		494	617	826	645.667				0.217767	0.29717	0.216195			0.388365	0.485063	0.649371					0.000101856	2.17134e-05	1.26972e-05	4.54221e-05		4.90543e-07	5.12466e-07	4.31105e-07	4.78038e-07		95.0177
NM_010685	396	6596	7472	5235	6434.33		7416	14685	24967	15689.3				16.6566	18.8687	13.2197			18.7273	37.0833	63.048					0.00779072	0.00137869	0.000776396	0.00331527		2.36544e-05	3.91783e-05	4.18564e-05	3.48964e-05		95.0033
NM_175399	226	87	113	128	109.333		199	88	377	221.333				0.384956	0.5	0.566372			0.880531	0.389381	1.66814					0.000180054	3.65337e-05	3.32632e-05	8.32837e-05		1.1122e-06	4.11378e-07	1.10745e-06	8.77008e-07		94.9634
NM_001177323	409	154	114	90	119.333		245	164	632	347				0.376528	0.278729	0.220049			0.599022	0.400978	1.54523					0.000176112	2.0366e-05	1.29235e-05	6.98006e-05		7.56624e-07	4.23631e-07	1.02585e-06	7.35368e-07		94.9192
NM_019942	410	154	114	90	119.333		245	164	632	347				0.37561	0.278049	0.219512			0.597561	0.4	1.54146					0.000175683	2.03163e-05	1.2892e-05	6.96304e-05		7.54778e-07	4.22598e-07	1.02335e-06	7.33575e-07		94.9192
NM_053257	106	2131	3350	2282	2587.67		2474	2870	12555	5966.33				20.1038	31.6038	21.5283			23.3396	27.0755	118.443					0.00940307	0.0023092	0.00126436	0.00432555		2.94802e-05	2.86051e-05	7.86323e-05	4.55725e-05		94.9156
NM_001252219	106	2131	3350	2282	2587.67		2474	2870	12555	5966.33				20.1038	31.6038	21.5283			23.3396	27.0755	118.443					0.00940307	0.0023092	0.00126436	0.00432555		2.94802e-05	2.86051e-05	7.86323e-05	4.55725e-05		94.9156
NM_001252218	106	2131	3350	2282	2587.67		2474	2870	12555	5966.33				20.1038	31.6038	21.5283			23.3396	27.0755	118.443					0.00940307	0.0023092	0.00126436	0.00432555		2.94802e-05	2.86051e-05	7.86323e-05	4.55725e-05		94.9156
NM_199307	734	468	300	232	333.333		823	636	1462	973.667				0.637602	0.408719	0.316076			1.12125	0.866485	1.99183					0.000298224	2.9864e-05	1.85632e-05	0.00011555		1.41625e-06	9.15436e-07	1.32234e-06	1.21801e-06		94.8683
NM_001038492	455	6994	9988	8529	8503.67		10051	13752	30499	18100.7				15.3714	21.9516	18.7451			22.0901	30.2242	67.0308					0.00718963	0.00160395	0.0011009	0.00329816		2.7902e-05	3.19317e-05	4.45005e-05	3.4778e-05		94.8346
NM_026392	235	107	167	117	130.333		205	248	314	255.667				0.455319	0.710638	0.497872			0.87234	1.05532	1.33617					0.000212965	5.19245e-05	2.92402e-05	9.80432e-05		1.10185e-06	1.11494e-06	8.87058e-07	1.03462e-06		94.7629
NM_001177324	415	154	114	90	119.333		245	165	633	347.667				0.371084	0.274699	0.216867			0.590361	0.39759	1.5253					0.000173566	2.00715e-05	1.27367e-05	6.87914e-05		7.45685e-07	4.20052e-07	1.01262e-06	7.26118e-07		94.7386
NM_001080384	199	1903	2050	1071	1674.67		4458	2059	5805	4107.33				9.56281	10.3015	5.38191			22.402	10.3467	29.1709					0.00447278	0.000752704	0.000316081	0.00184719		2.82959e-05	1.09313e-05	1.9366e-05	1.95311e-05		94.577
NM_011809	449	1296	1615	1088	1333		1677	3159	4342	3059.33				2.88641	3.59688	2.42316			3.73497	7.03563	9.67038					0.00135005	0.000262815	0.000142313	0.00058506		4.71763e-06	7.43311e-06	6.41998e-06	6.19024e-06		94.5134
NM_009128	339	965	1144	325	811.333		1658	2467	1764	1963				2.84661	3.37463	0.958702			4.89086	7.27729	5.20354					0.00133143	0.000246575	5.63048e-05	0.000544772		6.17763e-06	7.68841e-06	3.45453e-06	5.77352e-06		94.3569
NM_008944	215	1518	2085	1567	1723.33		1600	2802	7739	4047				7.06047	9.69767	7.28837			7.44186	13.0326	35.9953					0.00330237	0.000708584	0.000428048	0.00147967		9.3998e-06	1.37688e-05	2.38966e-05	1.56884e-05		94.3159
NM_009460	82	281	305	235	273.667		639	379	858	625.333				3.42683	3.71951	2.86585			7.79268	4.62195	10.4634					0.00160282	0.000271775	0.000168312	0.000680969		9.84292e-06	4.88306e-06	6.94646e-06	7.22415e-06		94.2629
NM_008906	473	7158	10157	8668	8661		10187	14142	31650	18659.7				15.1332	21.4736	18.3256			21.537	29.8985	66.9133					0.0070782	0.00156902	0.00107627	0.00324116		2.72033e-05	3.15876e-05	4.44225e-05	3.44045e-05		94.2075
NM_027209	225	991	1125	415	843.667		1459	2479	2397	2111.67				4.40444	5	1.84444			6.48444	11.0178	10.6533					0.00206008	0.000365337	0.000108325	0.000844579		8.19049e-06	1.16402e-05	7.07255e-06	8.96775e-06		94.1796
NM_173757	396	157	203	174	178		153	287	829	423				0.396465	0.512626	0.439394			0.386364	0.724747	2.09343					0.000185437	3.74563e-05	2.58057e-05	8.28997e-05		4.88015e-07	7.65691e-07	1.38979e-06	8.81166e-07		94.0796
NM_001113326	439	6935	8703	4197	6611.67		12003	15098	19201	15434				15.7973	19.8246	9.56036			27.3417	34.3918	43.738					0.00738881	0.00144853	0.000561483	0.00313294		3.45352e-05	3.63347e-05	2.90369e-05	3.33023e-05		94.0759
NM_020590	98	103	198	208	169.667		89	228	667	328				1.05102	2.02041	2.12245			0.908163	2.32653	6.80612					0.00049159	0.000147626	0.000124652	0.000254623		1.1471e-06	2.45797e-06	4.51846e-06	2.70784e-06		94.0317
NM_178897	435	101	136	100	112.333		155	196	404	251.667				0.232184	0.312644	0.229885			0.356322	0.450575	0.928736					0.000108599	2.28441e-05	1.35012e-05	4.83146e-05		4.5007e-07	4.76029e-07	6.1657e-07	5.14223e-07		93.9566
NM_133838	522	1896	2594	1967	2152.33		2290	4551	7534	4791.67				3.63218	4.96935	3.7682			4.38697	8.71839	14.433					0.00169887	0.000363097	0.000221307	0.000761091		5.54118e-06	9.21093e-06	9.58176e-06	8.11129e-06		93.8311
NM_011113	308	585	1109	887	860.333		826	1523	2536	1628.33				1.89935	3.60065	2.87987			2.68182	4.94481	8.23377					0.000888377	0.00026309	0.000169135	0.000440201		3.3874e-06	5.22416e-06	5.46624e-06	4.6926e-06		93.8075
NM_001136066	296	1105	1325	1243	1224.33		1687	1556	5340	2861				3.73311	4.47635	4.19932			5.69932	5.25676	18.0405					0.00174607	0.000327075	0.000246627	0.000773259		7.19881e-06	5.55373e-06	1.19768e-05	8.2431e-06		93.8068
NM_010443	296	1105	1325	1243	1224.33		1687	1556	5340	2861				3.73311	4.47635	4.19932			5.69932	5.25676	18.0405					0.00174607	0.000327075	0.000246627	0.000773259		7.19881e-06	5.55373e-06	1.19768e-05	8.2431e-06		93.8068
NM_008437	400	214	155	205	191.333		385	239	872	498.667				0.535	0.3875	0.5125			0.9625	0.5975	2.18					0.000250234	2.83136e-05	3.00993e-05	0.000102882		1.21573e-06	6.31255e-07	1.44726e-06	1.09808e-06		93.6926
NM_009448	430	13317	21377	18560	17751.3		22269	22239	65442	36650				30.9698	49.714	43.1628			51.7884	51.7186	152.191					0.0144854	0.00363247	0.00253496	0.00688427		6.54138e-05	5.46404e-05	0.000101037	7.36969e-05		93.4133
NM_009283	730	2470	2768	1227	2155		4417	5162	6441	5340				3.38356	3.79178	1.68082			6.05068	7.07123	8.82329					0.00158258	0.000277055	9.87151e-05	0.000652784		7.64261e-06	7.47071e-06	5.85761e-06	6.99031e-06		93.3841
NM_001205314	730	2470	2768	1227	2155		4417	5162	6441	5340				3.38356	3.79178	1.68082			6.05068	7.07123	8.82329					0.00158258	0.000277055	9.87151e-05	0.000652784		7.64261e-06	7.47071e-06	5.85761e-06	6.99031e-06		93.3841
NM_008328	390	414	659	308	460.333		737	943	1290	990				1.06154	1.68974	0.789744			1.88974	2.41795	3.30769					0.00049651	0.000123465	4.63818e-05	0.000222119		2.38693e-06	2.55455e-06	2.19591e-06	2.37913e-06		93.3614
NM_001164107	403	289	431	350	356.667		366	603	1366	778.333				0.717122	1.06948	0.868486			0.908189	1.49628	3.38958					0.000335417	7.8144e-05	5.10064e-05	0.000154856		1.14713e-06	1.58081e-06	2.25028e-06	1.65941e-06		93.3201
NM_001164108	403	289	431	350	356.667		366	603	1366	778.333				0.717122	1.06948	0.868486			0.908189	1.49628	3.38958					0.000335417	7.8144e-05	5.10064e-05	0.000154856		1.14713e-06	1.58081e-06	2.25028e-06	1.65941e-06		93.3201
NM_010551	1303	165	116	84	121.667		284	218	575	359				0.126631	0.0890253	0.0644666			0.217959	0.167306	0.441289					5.92286e-05	6.50485e-06	3.78614e-06	2.31732e-05		2.75303e-07	1.76758e-07	2.92964e-07	2.48342e-07		93.3119
NM_178708	380	219	303	235	252.333		271	465	979	571.667				0.576316	0.797368	0.618421			0.713158	1.22368	2.57632					0.000269558	5.82616e-05	3.632e-05	0.00012138		9.00789e-07	1.29281e-06	1.71037e-06	1.30132e-06		93.2743
NM_013721	247	4406	5074	3848	4442.67		7278	4498	21942	11239.3				17.8381	20.5425	15.5789			29.4656	18.2105	88.834					0.00834334	0.00150099	0.000914956	0.00358643		3.72179e-05	1.92393e-05	5.89752e-05	3.84775e-05		93.2085
NM_145609	326	148	220	191	186.333		336	227	560	374.333				0.453988	0.674847	0.58589			1.03067	0.696319	1.71779					0.000212342	4.93093e-05	3.44094e-05	9.8687e-05		1.30184e-06	7.35657e-07	1.14041e-06	1.0593e-06		93.1622
NM_133679	329	160	261	186	202.333		160	286	936	460.667				0.486322	0.793313	0.56535			0.486322	0.869301	2.84498					0.000227466	5.79653e-05	3.32031e-05	0.000106211		6.14273e-07	9.18411e-07	1.88873e-06	1.14047e-06		93.1294
NM_030131	120	492	471	383	448.667		540	1118	1840	1166				4.1	3.925	3.19167			4.5	9.31667	15.3333					0.00191768	0.000286789	0.000187447	0.000797306		5.68394e-06	9.843e-06	1.01795e-05	8.56882e-06		93.0473
NM_019980	142	464	849	575	629.333		632	1117	2085	1278				3.26761	5.97887	4.0493			4.4507	7.8662	14.6831					0.00152835	0.000436861	0.000237816	0.000734341		5.62168e-06	8.31059e-06	9.74783e-06	7.89337e-06		93.0327
NM_007564	319	342	545	496	461		844	495	1316	885				1.0721	1.70846	1.55486			2.64577	1.55172	4.12539					0.00050145	0.000124833	9.13173e-05	0.0002392		3.34187e-06	1.63939e-06	2.73877e-06	2.57334e-06		92.9531
NM_018822	483	243	220	223	228.667		596	256	774	542				0.503106	0.455487	0.461698			1.23395	0.530021	1.60248					0.000235316	3.32812e-05	2.71156e-05	9.85709e-05		1.55861e-06	5.59964e-07	1.06386e-06	1.06081e-06		92.9205
NM_026159	590	286	312	252	283.333		375	565	1166	702				0.484746	0.528814	0.427119			0.635593	0.957627	1.97627					0.000226729	3.8639e-05	2.50848e-05	9.68175e-05		8.02817e-07	1.01173e-06	1.31201e-06	1.04218e-06		92.8986
NM_009005	188	2018	2336	1354	1902.67		2705	4372	7293	4790				10.734	12.4255	7.20213			14.3883	23.2553	38.7926					0.0050206	0.000907901	0.000422983	0.00211716		1.81738e-05	2.45691e-05	2.57536e-05	2.28322e-05		92.727
NM_008163	198	605	958	511	691.333		1030	1378	2070	1492.67				3.05556	4.83838	2.58081			5.20202	6.9596	10.4545					0.00142917	0.000353528	0.000151572	0.000644755		6.57066e-06	7.35277e-06	6.94057e-06	6.95467e-06		92.7082
NM_011751	441	1308	1542	1428	1426		2170	2503	5030	3234.33				2.96599	3.4966	3.2381			4.92063	5.67574	11.4059					0.00138727	0.000255487	0.000190174	0.000610978		6.21525e-06	5.99638e-06	7.57216e-06	6.59459e-06		92.6482
NM_011794	289	219	228	199	215.333		339	359	910	536				0.757785	0.788927	0.688581			1.17301	1.24221	3.14879					0.000354437	5.76448e-05	4.04406e-05	0.000150841		1.48163e-06	1.31239e-06	2.09042e-06	1.62815e-06		92.6456
NM_178923	1190	260	203	162	208.333		424	464	828	572				0.218487	0.170588	0.136134			0.356303	0.389916	0.695798					0.000102192	1.24644e-05	7.99521e-06	4.0884e-05		4.50045e-07	4.11944e-07	4.61927e-07	4.41305e-07		92.6434
NM_026064	153	1725	3617	2592	2644.67		2443	2662	11010	5371.67				11.2745	23.6405	16.9412			15.9673	17.3987	71.9608					0.00527339	0.00172735	0.00099496	0.00266523		2.01683e-05	1.83816e-05	4.77734e-05	2.87744e-05		92.6251
NM_001164077	233	213	268	248	243		277	356	1082	571.667				0.914163	1.15021	1.06438			1.18884	1.5279	4.64378					0.000427579	8.40432e-05	6.25112e-05	0.000191378		1.50162e-06	1.61421e-06	3.08292e-06	2.06625e-06		92.6207
NM_001164076	233	213	268	248	243		277	356	1082	571.667				0.914163	1.15021	1.06438			1.18884	1.5279	4.64378					0.000427579	8.40432e-05	6.25112e-05	0.000191378		1.50162e-06	1.61421e-06	3.08292e-06	2.06625e-06		92.6207
NM_001164074	233	213	268	248	243		277	356	1082	571.667				0.914163	1.15021	1.06438			1.18884	1.5279	4.64378					0.000427579	8.40432e-05	6.25112e-05	0.000191378		1.50162e-06	1.61421e-06	3.08292e-06	2.06625e-06		92.6207
NM_145079	512	967	992	868	942.333		1446	2016	3418	2293.33				1.88867	1.9375	1.69531			2.82422	3.9375	6.67578					0.000883383	0.000141568	9.95661e-05	0.000374839		3.56727e-06	4.15994e-06	4.43192e-06	4.05305e-06		92.4833
NM_001198867	1220	792	967	754	837.667		1518	1593	2484	1865				0.64918	0.792623	0.618033			1.24426	1.30574	2.03607					0.000303639	5.79149e-05	3.62972e-05	0.000132617		1.57163e-06	1.3795e-06	1.35171e-06	1.43428e-06		92.4626
NM_133672	308	1442	1472	891	1268.33		1817	3143	5136	3365.33				4.68182	4.77922	2.89286			5.89935	10.2045	16.6753					0.00218981	0.000349205	0.000169898	0.000902972		7.45146e-06	1.0781e-05	1.10704e-05	9.76764e-06		92.4452
NM_010233	2458	231	1938	372	847		346	1734	1006	1028.67				0.0939788	0.788446	0.151343			0.140765	0.705452	0.409276					4.39564e-05	5.76097e-05	8.88839e-06	3.68182e-05		1.778e-07	7.45305e-07	2.7171e-07	3.98272e-07		92.4448
NM_027415	234	107	169	118	131.333		208	257	325	263.333				0.457265	0.722222	0.504274			0.888889	1.09829	1.38889					0.000213875	5.27709e-05	2.96161e-05	9.8754e-05		1.12275e-06	1.16034e-06	9.22057e-07	1.06838e-06		92.4332
NM_001045481	438	415	659	313	462.333		741	953	1323	1005.67				0.947489	1.50457	0.714612			1.69178	2.1758	3.02055					0.000443166	0.000109935	4.19693e-05	0.000198357		2.13689e-06	2.29872e-06	2.00528e-06	2.14696e-06		92.3894
NM_021557	297	239	428	352	339.667		350	527	1168	681.667				0.804714	1.44108	1.18519			1.17845	1.77441	3.93266					0.000376386	0.000105296	6.96062e-05	0.000183763		1.4885e-06	1.87465e-06	2.61082e-06	1.99132e-06		92.2817
NM_031195	335	6839	8576	4116	6510.33		12002	15340	19147	15496.3				20.4149	25.6	12.2866			35.8269	45.791	57.1552					0.00954861	0.00187052	0.000721593	0.00404691		4.52529e-05	4.8378e-05	3.79443e-05	4.38584e-05		92.2722
NM_001145164	396	314	262	154	243.333		584	577	830	663.667				0.792929	0.661616	0.388889			1.47475	1.45707	2.09596					0.000370874	4.83426e-05	2.28395e-05	0.000147352		1.86275e-06	1.53939e-06	1.39147e-06	1.59787e-06		92.2179
NM_026938	169	72	120	196	129.333		237	98	275	203.333				0.426036	0.710059	1.15976			1.40237	0.579882	1.62722					0.000199268	5.18822e-05	6.81132e-05	0.000106421		1.77133e-06	6.12641e-07	1.08028e-06	1.15475e-06		92.1596
NM_008401	1134	11802	16809	8376	12329		17252	32084	34511	27949				10.4074	14.8228	7.38624			15.2134	28.2928	30.433					0.00486782	0.00108306	0.000433796	0.00212823		1.9216e-05	2.98911e-05	2.02039e-05	2.31037e-05		92.1163
NM_001110212	1266	261	376	272	303		487	605	819	637				0.206161	0.296998	0.21485			0.384676	0.477883	0.646919					9.64271e-05	2.17009e-05	1.26182e-05	4.35821e-05		4.85884e-07	5.04881e-07	4.29478e-07	4.73414e-07		92.0591
NM_146032	606	400	603	426	476.333		898	771	1259	976				0.660066	0.99505	0.70297			1.48185	1.27228	2.07756					0.000308731	7.27056e-05	4.12856e-05	0.000140907		1.87172e-06	1.34415e-06	1.37925e-06	1.53171e-06		91.9936
NM_026519	164	259	345	302	302		287	698	1031	672				1.57927	2.10366	1.84146			1.75	4.2561	6.28659					0.000738666	0.000153709	0.00010815	0.000333508		2.21042e-06	4.49654e-06	4.17354e-06	3.62684e-06		91.9557
NM_172501	328	332	418	347	365.667		477	688	1376	847				1.0122	1.27439	1.05793			1.45427	2.09756	4.19512					0.000473431	9.31163e-05	6.21323e-05	0.00020956		1.83688e-06	2.21606e-06	2.78506e-06	2.27934e-06		91.939
NM_020483	289	205	261	219	228.333		356	277	980	537.667				0.709343	0.903114	0.757785			1.23183	0.958478	3.391					0.000331779	6.59882e-05	4.45049e-05	0.000147424		1.55593e-06	1.01263e-06	2.25122e-06	1.60659e-06		91.7619
NM_019951	160	512	627	415	518		752	1073	1948	1257.67				3.2	3.91875	2.59375			4.7	6.70625	12.175					0.00149673	0.000286333	0.000152332	0.00064513		5.93656e-06	7.08511e-06	8.08275e-06	7.03481e-06		91.7054
NM_007622	166	162	212	169	181		184	360	740	428				0.975904	1.27711	1.01807			1.10843	2.16867	4.45783					0.000456456	9.3315e-05	5.97916e-05	0.000203188		1.40006e-06	2.29119e-06	2.95947e-06	2.21691e-06		91.6536
NM_010833	558	8683	10239	7467	8796.33		14161	14833	35719	21571				15.5609	18.3495	13.3817			25.3781	26.5824	64.0125					0.00727827	0.00134075	0.000785912	0.00313497		3.20551e-05	2.80842e-05	4.24967e-05	3.4212e-05		91.6338
NM_026114	296	1041	1407	909	1119		1501	2106	4367	2658				3.51689	4.75338	3.07095			5.07095	7.11486	14.7534					0.00164494	0.000347317	0.000180357	0.000724206		6.4051e-06	7.51681e-06	9.79449e-06	7.90547e-06		91.6083
NM_027959	426	2951	3029	1516	2498.67		5591	6044	7572	6402.33				6.92723	7.11033	3.55869			13.1244	14.1878	17.7746					0.00324005	0.000519533	0.000209002	0.00132286		1.65774e-05	1.49893e-05	1.18003e-05	1.44557e-05		91.5117
NM_008621	447	2077	2939	2123	2379.67		2223	5027	9358	5536				4.64653	6.57494	4.74944			4.97315	11.2461	20.9351					0.00217331	0.000480414	0.000278936	0.000977553		6.28158e-06	1.18814e-05	1.38984e-05	1.06871e-05		91.4699
NM_023514	371	258	212	169	213		480	426	815	573.667				0.695418	0.571429	0.455526			1.2938	1.14825	2.19677					0.000325266	4.17528e-05	2.67531e-05	0.000131257		1.6342e-06	1.21312e-06	1.45839e-06	1.43524e-06		91.4534
NM_199201	226	1694	1832	848	1458		3006	3511	4769	3762				7.49558	8.10619	3.75221			13.3009	15.5354	21.1018					0.00350588	0.000592298	0.000220368	0.00143952		1.68003e-05	1.64131e-05	1.40091e-05	1.57408e-05		91.4512
NM_009388	604	4206	5502	3532	4413.33		6898	7559	17307	10588				6.96358	9.10927	5.84768			11.4205	12.5149	28.654					0.00325705	0.00066559	0.000343436	0.00142203		1.44253e-05	1.32219e-05	1.90228e-05	1.55567e-05		91.4094
NM_001130169	476	1301	1571	1443	1438.33		2299	2509	4958	3255.33				2.73319	3.30042	3.03151			4.82983	5.27101	10.416					0.00127839	0.000241153	0.000178041	0.000565861		6.10055e-06	5.56879e-06	6.91496e-06	6.19477e-06		91.345
NM_016876	301	567	724	543	611.333		1017	782	2594	1464.33				1.88372	2.40532	1.80399			3.37874	2.59801	8.61794					0.000881067	0.00017575	0.000105949	0.000387589		4.26768e-06	2.74478e-06	5.72129e-06	4.24458e-06		91.3137
NM_146023	425	3317	4277	3256	3616.67		5262	6109	14173	8514.67				7.80471	10.0635	7.66118			12.3812	14.3741	33.3482					0.00365047	0.000735316	0.000449943	0.00161191		1.56386e-05	1.51862e-05	2.21393e-05	1.76547e-05		91.3021
NM_001077496	425	3317	4277	3256	3616.67		5262	6109	14173	8514.67				7.80471	10.0635	7.66118			12.3812	14.3741	33.3482					0.00365047	0.000735316	0.000449943	0.00161191		1.56386e-05	1.51862e-05	2.21393e-05	1.76547e-05		91.3021
NM_175654	84	7027	12766	13820	11204.3		1933	20271	47068	23090.7				83.6548	151.976	164.524			23.0119	241.321	560.333					0.0391276	0.0111045	0.00966252	0.0199649		2.90663e-05	0.000254955	0.000371995	0.000218672		91.3006
NM_001113355	340	1452	1481	900	1277.67		1834	3232	5233	3433				4.27059	4.35588	2.64706			5.39412	9.50588	15.3912					0.00199747	0.000318273	0.000155462	0.000823735		6.8133e-06	1.00429e-05	1.02179e-05	9.02471e-06		91.2755
NM_001166138	380	100	211	157	156		94	279	556	309.667				0.263158	0.555263	0.413158			0.247368	0.734211	1.46316					0.000123086	4.05716e-05	2.42649e-05	6.26408e-05		3.12451e-07	7.75689e-07	9.71363e-07	6.86501e-07		91.2466
NM_008443	682	179	150	116	148.333		299	368	522	396.333				0.262463	0.219941	0.170088			0.438416	0.539589	0.765396					0.000122761	1.60705e-05	9.98931e-06	4.9607e-05		5.53763e-07	5.70073e-07	5.08132e-07	5.43989e-07		91.1911
NM_018819	90	225	402	266	297.667		209	511	1272	664				2.5	4.46667	2.95556			2.32222	5.67778	14.1333					0.00116932	0.000326368	0.000173581	0.000556422		2.9332e-06	5.99854e-06	9.38285e-06	6.10486e-06		91.144
NM_001172062	498	1031	1289	813	1044.33		1731	2186	3543	2486.67				2.07028	2.58835	1.63253			3.4759	4.38956	7.11446					0.000968326	0.000189124	9.58789e-05	0.000417776		4.39041e-06	4.63754e-06	4.72315e-06	4.5837e-06		91.1439
NM_027044	135	737	1038	651	808.667		702	1307	4167	2058.67				5.45926	7.68889	4.82222			5.2	9.68148	30.8667					0.00255344	0.000561807	0.00028321	0.00113282		6.56811e-06	1.02284e-05	2.04918e-05	1.24294e-05		91.14
NM_172400	234	545	566	477	529.333		975	714	2369	1352.67				2.32906	2.4188	2.03846			4.16667	3.05128	10.1239					0.00108936	0.000176736	0.000119719	0.00046194		5.26291e-06	3.22366e-06	6.72109e-06	5.06922e-06		91.1264
NM_199201_dup1	226	1694	1832	848	1458		3038	3514	4770	3774				7.49558	8.10619	3.75221			13.4425	15.5487	21.1062					0.00350588	0.000592298	0.000220368	0.00143952		1.69792e-05	1.64271e-05	1.4012e-05	1.58061e-05		91.0735
NM_001101657_dup1	226	1694	1832	848	1458		3038	3514	4770	3774				7.49558	8.10619	3.75221			13.4425	15.5487	21.1062					0.00350588	0.000592298	0.000220368	0.00143952		1.69792e-05	1.64271e-05	1.4012e-05	1.58061e-05		91.0735
NM_001101656_dup1	226	1694	1832	848	1458		3038	3514	4770	3774				7.49558	8.10619	3.75221			13.4425	15.5487	21.1062					0.00350588	0.000592298	0.000220368	0.00143952		1.69792e-05	1.64271e-05	1.4012e-05	1.58061e-05		91.0735
NM_013532	316	10838	7615	5769	8074		22327	15563	31450	23113.3				34.2975	24.0981	18.2563			70.6551	49.25	99.5253					0.0160418	0.00176078	0.0010722	0.00629161		8.92443e-05	5.20323e-05	6.6073e-05	6.91165e-05		91.029
NM_133763	309	168	180	122	156.667		307	339	513	386.333				0.543689	0.582524	0.394822			0.993528	1.09709	1.66019					0.000254298	4.25635e-05	2.3188e-05	0.000106683		1.25492e-06	1.15907e-06	1.10217e-06	1.17205e-06		91.0225
NM_021429	376	196	182	157	178.333		357	368	627	450.667				0.521277	0.484043	0.417553			0.949468	0.978723	1.66755					0.000243815	3.53677e-05	2.4523e-05	0.000101235		1.19927e-06	1.03402e-06	1.10706e-06	1.11345e-06		90.9205
NM_025776	401	262	338	303	301		294	436	1482	737.333				0.653367	0.842893	0.755611			0.733167	1.08728	3.69576					0.000305597	6.1588e-05	4.43772e-05	0.000137187		9.26062e-07	1.14871e-06	2.45355e-06	1.50944e-06		90.8864
NM_023456	78	440	392	300	377.333		1213	302	1392	969				5.64103	5.02564	3.84615			15.5513	3.87179	17.8462					0.00263846	0.00036721	0.000225886	0.00107719		1.96428e-05	4.09053e-06	1.18477e-05	1.18603e-05		90.8224
NM_007932	634	396	554	460	470		714	874	1443	1010.33				0.624606	0.873817	0.725552			1.12618	1.37855	2.27603					0.000292145	6.38475e-05	4.26119e-05	0.000132868		1.42248e-06	1.45643e-06	1.51101e-06	1.46331e-06		90.7999
NM_019441	283	441	473	432	448.667		965	822	1273	1020				1.5583	1.67138	1.5265			3.40989	2.90459	4.49823					0.000728861	0.000122123	8.96518e-05	0.000313545		4.30703e-06	3.06869e-06	2.98629e-06	3.454e-06		90.7773
NM_001037717	438	149	109	50	102.667		297	305	287	296.333				0.340183	0.248858	0.114155			0.678082	0.696347	0.655251					0.000159113	1.81834e-05	6.70437e-06	6.13335e-05		8.56484e-07	7.35686e-07	4.35009e-07	6.75727e-07		90.7667
NM_010023	270	155	164	96	138.333		325	180	591	365.333				0.574074	0.607407	0.355556			1.2037	0.666667	2.18889					0.00026851	4.43817e-05	2.08819e-05	0.000111258		1.5204e-06	7.04329e-07	1.45316e-06	1.22596e-06		90.7514
NM_013863	558	363	714	682	586.333		523	895	1930	1116				0.650538	1.27957	1.22222			0.937276	1.60394	3.45878					0.000304274	9.34948e-05	7.17814e-05	0.000156517		1.18387e-06	1.69456e-06	2.29622e-06	1.72488e-06		90.7405
NM_010209	488	537	804	573	638		639	1087	2760	1495.33				1.10041	1.64754	1.17418			1.30943	2.22746	5.65574					0.000514691	0.000120381	6.89599e-05	0.000234678		1.65393e-06	2.3533e-06	3.75474e-06	2.58732e-06		90.7029
NM_145585	331	242	242	186	223.333		375	412	986	591				0.731118	0.731118	0.561934			1.13293	1.24471	2.97885					0.000341963	5.34209e-05	3.30025e-05	0.000142796		1.431e-06	1.31503e-06	1.9776e-06	1.57455e-06		90.69
NM_001037177	654	115	239	123	159		257	222	463	314				0.175841	0.365443	0.188073			0.392966	0.33945	0.707951					8.22455e-05	2.6702e-05	1.10456e-05	3.99977e-05		4.96355e-07	3.58626e-07	4.69995e-07	4.41659e-07		90.5624
NM_016753	203	252	454	257	321		472	555	982	669.667				1.24138	2.23645	1.26601			2.32512	2.73399	4.83744					0.000580626	0.000163412	7.43531e-05	0.000272797		2.93686e-06	2.88844e-06	3.21148e-06	3.01226e-06		90.5622
NM_028761	605	193	222	169	194.667		304	401	722	475.667				0.319008	0.366942	0.279339			0.502479	0.66281	1.19339					0.000149209	2.68115e-05	1.64056e-05	6.4142e-05		6.34681e-07	7.00255e-07	7.92268e-07	7.09068e-07		90.4596
NM_025595	109	159	291	211	220.333		436	184	680	433.333				1.45872	2.66972	1.93578			4	1.68807	6.23853					0.00068228	0.00019507	0.000113689	0.000330346		5.05239e-06	1.78344e-06	4.14164e-06	3.65916e-06		90.2793
NM_172591	790	649	862	564	691.667		1061	1577	2144	1594				0.821519	1.09114	0.713924			1.34304	1.9962	2.71392					0.000384246	7.97267e-05	4.19289e-05	0.000168634		1.69639e-06	2.10898e-06	1.80172e-06	1.86903e-06		90.2255
NM_001037713	254	224	285	145	218		489	374	716	526.333				0.88189	1.12205	0.570866			1.9252	1.47244	2.8189					0.000412484	8.1985e-05	3.35271e-05	0.000175999		2.43171e-06	1.55562e-06	1.87141e-06	1.95292e-06		90.1209
NM_001083891	85	283	381	291	318.333		508	279	1553	780				3.32941	4.48235	3.42353			5.97647	3.28235	18.2706					0.00155726	0.000327514	0.000201065	0.000695278		7.54887e-06	3.46779e-06	1.21295e-05	7.71538e-06		90.1158
NM_013663	145	560	949	900	803		1082	1110	2598	1596.67				3.86207	6.54483	6.2069			7.46207	7.65517	17.9172					0.00180639	0.000478213	0.000364533	0.000883046		9.42533e-06	8.08764e-06	1.18949e-05	9.80263e-06		90.0826
NM_007995	315	116	156	58	110		230	275	280	261.667				0.368254	0.495238	0.184127			0.730159	0.873016	0.888889					0.000172242	3.61857e-05	1.08138e-05	7.30806e-05		9.22262e-07	9.22336e-07	5.90116e-07	8.11572e-07		90.0483
NM_031201	302	181	258	257	232		309	281	949	513				0.599338	0.854305	0.850993			1.02318	0.930464	3.14238					0.000280326	6.24218e-05	4.99791e-05	0.000130909		1.29238e-06	9.83029e-07	2.08617e-06	1.45386e-06		90.0425
NM_001159514	350	489	606	420	505		940	743	2011	1231.33				1.39714	1.73143	1.2			2.68571	2.12286	5.74571					0.000653481	0.000126511	7.04763e-05	0.000283489		3.39232e-06	2.24279e-06	3.81447e-06	3.14986e-06		90.0007
NM_001111275	134	1732	2217	1488	1812.33		3370	2769	6944	4361				12.9254	16.5448	11.1045			25.1493	20.6642	51.8209					0.00604554	0.00120888	0.000652169	0.00263553		3.1766e-05	2.18316e-05	3.44029e-05	2.93335e-05		89.8472
NM_019868	430	688	1082	881	883.667		1120	1450	3160	1910				1.6	2.51628	2.04884			2.60465	3.37209	7.34884					0.000748363	0.000183858	0.000120329	0.00035085		3.28993e-06	3.5626e-06	4.87875e-06	3.91043e-06		89.7216
NM_008704	133	489	937	528	651.333		1044	676	2452	1390.67				3.67669	7.04511	3.96992			7.84962	5.08271	18.4361					0.00171969	0.000514768	0.000233155	0.000822537		9.91485e-06	5.36985e-06	1.22394e-05	9.17469e-06		89.6528
NM_011029	276	3161	4285	3514	3653.33		6178	4269	15025	8490.67				11.4529	15.5254	12.7319			22.3841	15.4674	54.4384					0.00535683	0.0011344	0.000747747	0.00241299		2.82733e-05	1.63412e-05	3.61406e-05	2.69184e-05		89.6411
NM_007508	598	3445	4022	3186	3551		6412	6057	13321	8596.67				5.76087	6.72575	5.32776			10.7224	10.1288	22.2759					0.00269451	0.000491433	0.000312901	0.00116628		1.35435e-05	1.0701e-05	1.47886e-05	1.3011e-05		89.6382
NM_009450	426	1526	2410	1638	1858		2449	3545	6284	4092.67				3.58216	5.65728	3.84507			5.74883	8.3216	14.7512					0.00167547	0.000413362	0.000225822	0.000771552		7.26133e-06	8.79172e-06	9.79302e-06	8.61536e-06		89.5554
NM_001166480	154	777	1021	761	853		1770	1157	2911	1946				5.04545	6.62987	4.94156			11.4935	7.51299	18.9026					0.00235989	0.000484427	0.000290219	0.00104485		1.45174e-05	7.93742e-06	1.25491e-05	1.1668e-05		89.5483
NM_001268286	1111	4502	6339	3852	4897.67		5777	12575	16026	11459.3				4.05221	5.70567	3.46715			5.19982	11.3186	14.4248					0.00189533	0.000416898	0.000203626	0.000838617		6.56788e-06	1.19581e-05	9.57638e-06	9.36744e-06		89.5246
NM_001034851	461	850	557	445	617.333		2197	1000	2046	1747.67				1.84382	1.20824	0.965293			4.76573	2.1692	4.43818					0.000862403	8.82831e-05	5.66919e-05	0.000335793		6.01958e-06	2.29174e-06	2.94642e-06	3.75258e-06		89.4831
NM_153570	497	173	198	174	181.667		277	306	764	449				0.348089	0.39839	0.350101			0.557344	0.615694	1.53722					0.00016281	2.91093e-05	2.05615e-05	7.08271e-05		7.0398e-07	6.50477e-07	1.02053e-06	7.91664e-07		89.4661
NM_001146348	633	387	539	451	459		712	859	1435	1002				0.611374	0.851501	0.71248			1.1248	1.35703	2.26698					0.000285956	6.22169e-05	4.18441e-05	0.000130006		1.42074e-06	1.43369e-06	1.50501e-06	1.45315e-06		89.4651
NM_172561	208	309	442	316	355.667		617	497	1328	814				1.48558	2.125	1.51923			2.96635	2.38942	6.38462					0.000694844	0.000155268	8.92248e-05	0.000313112		3.74679e-06	2.52441e-06	4.23862e-06	3.50327e-06		89.3771
NM_001243916	466	132	221	116	156.333		132	399	542	357.667				0.283262	0.474249	0.248927			0.283262	0.856223	1.16309					0.000132489	3.46521e-05	1.46195e-05	6.05869e-05		3.57788e-07	9.04595e-07	7.72153e-07	6.78179e-07		89.3377
NM_019803	146	194	291	230	238.333		267	417	945	543				1.32877	1.99315	1.57534			1.82877	2.85616	6.4726					0.0006215	0.000145634	9.25203e-05	0.000286552		2.30991e-06	3.01752e-06	4.29704e-06	3.20816e-06		89.3197
NM_009338	378	164	158	141	154.333		359	274	509	380.667				0.433862	0.417989	0.373016			0.949735	0.724868	1.34656					0.000202929	3.05414e-05	2.19073e-05	8.51259e-05		1.19961e-06	7.65818e-07	8.93956e-07	9.53128e-07		89.3122
NM_009832	563	181	236	184	200.333		443	270	629	447.333				0.321492	0.419183	0.326821			0.786856	0.479574	1.11723					0.00015037	3.06286e-05	1.91943e-05	6.67311e-05		9.93877e-07	5.06667e-07	7.41707e-07	7.47417e-07		89.2823
NM_026244	289	95	120	91	102		194	179	334	235.667				0.32872	0.415225	0.314879			0.67128	0.619377	1.15571					0.000153751	3.03394e-05	1.84929e-05	6.75278e-05		8.47893e-07	6.54368e-07	7.67253e-07	7.56505e-07		89.2628
NM_019489	282	147	195	150	164		214	282	695	397				0.521277	0.691489	0.531915			0.758865	1	2.46454					0.000243815	5.05253e-05	3.12395e-05	0.000108527		9.58521e-07	1.05649e-06	1.63616e-06	1.21706e-06		89.1712
NM_001130171	445	1313	1562	1433	1436		2333	2608	5137	3359.33				2.95056	3.51011	3.22022			5.2427	5.86067	11.5438					0.00138006	0.000256475	0.000189125	0.000608552		6.62204e-06	6.19177e-06	7.66372e-06	6.82584e-06		89.1541
NM_007452	238	512	668	519	566.333		660	1267	2119	1348.67				2.15126	2.80672	2.18067			2.77311	5.32353	8.90336					0.0010062	0.00020508	0.000128071	0.000446451		3.50271e-06	5.62428e-06	5.91077e-06	5.01259e-06		89.066
NM_153168	883	148	163	90	133.667		294	301	427	340.667				0.16761	0.184598	0.101925			0.332956	0.340883	0.483579					7.83959e-05	1.34881e-05	5.9861e-06	3.26234e-05		4.20556e-07	3.60141e-07	3.21039e-07	3.67245e-07		88.8326
NM_009911	340	535	546	1188	756.333		650	657	3824	1710.33				1.57353	1.60588	3.49412			1.91176	1.93235	11.2471					0.000735982	0.000117338	0.00020521	0.000352843		2.41475e-06	2.04152e-06	7.46671e-06	3.97432e-06		88.7807
NM_001159515	349	487	607	418	504		942	755	2042	1246.33				1.39542	1.73926	1.19771			2.69914	2.16332	5.851					0.000652673	0.000127083	7.03417e-05	0.000283366		3.40928e-06	2.28554e-06	3.88437e-06	3.19306e-06		88.7442
NM_001102407	155	242	385	210	279		596	472	723	597				1.56129	2.48387	1.35484			3.84516	3.04516	4.66452					0.000730257	0.00018149	7.957e-05	0.000330439		4.85682e-06	3.21719e-06	3.09668e-06	3.72356e-06		88.7427
NM_001253706	408	154	114	90	119.333		260	173	684	372.333				0.377451	0.279412	0.220588			0.637255	0.42402	1.67647					0.000176544	2.04159e-05	1.29552e-05	6.99717e-05		8.04916e-07	4.47974e-07	1.11298e-06	7.88622e-07		88.7265
NM_028727	652	403	225	169	265.667		648	718	1276	880.667				0.618098	0.345092	0.259202			0.993865	1.10123	1.95706					0.000289101	2.5215e-05	1.5223e-05	0.000109846		1.25535e-06	1.16344e-06	1.29925e-06	1.23935e-06		88.6325
NM_001135115	398	204	289	136	209.667		350	551	574	491.667				0.512563	0.726131	0.341709			0.879397	1.38442	1.44221					0.000239739	5.30565e-05	2.00686e-05	0.000104288		1.11076e-06	1.46263e-06	9.57457e-07	1.17695e-06		88.6087
NM_007888	717	163	95	113	123.667		217	186	818	407				0.227336	0.132497	0.157601			0.30265	0.259414	1.14086					0.000106331	9.68117e-06	9.25595e-06	4.17561e-05		3.82277e-07	2.7407e-07	7.57398e-07	4.71248e-07		88.6075
NM_001111316	1274	4574	6470	3921	4988.33		5884	12910	16594	11796				3.59027	5.07849	3.07771			4.61852	10.1334	13.0251					0.00167926	0.000371072	0.000180755	0.000743697		5.83365e-06	1.07059e-05	8.64713e-06	8.39556e-06		88.5821
NM_201644	509	946	950	854	916.667		1465	1932	3696	2364.33				1.85855	1.8664	1.6778			2.87819	3.79568	7.2613					0.000869292	0.000136373	9.85376e-05	0.000368068		3.63544e-06	4.01011e-06	4.82064e-06	4.1554e-06		88.5758
NM_024218	138	2461	2977	1886	2441.33		2449	3649	14714	6937.33				17.8333	21.5725	13.6667			17.7464	26.442	106.623					0.00834113	0.00157624	0.000802647	0.00357334		2.24154e-05	2.79358e-05	7.07851e-05	4.03788e-05		88.4955
NM_025613	140	786	830	889	835		1774	1192	2908	1958				5.61429	5.92857	6.35			12.6714	8.51429	20.7714					0.00262595	0.000433185	0.000372937	0.00114402		1.60053e-05	8.99529e-06	1.37898e-05	1.29301e-05		88.4776
NM_028126	375	114	138	122	124.667		251	203	401	285				0.304	0.368	0.325333			0.669333	0.541333	1.06933					0.000142189	2.68888e-05	1.91069e-05	6.27282e-05		8.45434e-07	5.71915e-07	7.0991e-07	7.09086e-07		88.4634
NM_023149	456	3210	4204	2975	3463		7149	5838	10881	7956				7.03947	9.2193	6.52412			15.6776	12.8026	23.8618					0.00329255	0.00067363	0.000383163	0.00144978		1.98024e-05	1.35259e-05	1.58414e-05	1.63899e-05		88.4557
NM_008317	443	80	209	111	133.333		169	262	270	233.667				0.180587	0.471783	0.250564			0.38149	0.591422	0.609481					8.44653e-05	3.4472e-05	1.47157e-05	4.4551e-05		4.81859e-07	6.24834e-07	4.04623e-07	5.03772e-07		88.4349
NM_001130170	460	1224	1486	1352	1354		2185	2471	4866	3174				2.66087	3.23043	2.93913			4.75	5.37174	10.5783					0.00124456	0.000236039	0.000172616	0.000551072		5.99972e-06	5.67521e-06	7.02271e-06	6.23254e-06		88.4184
NM_201641	511	942	956	852	916.667		1464	1932	3690	2362				1.84344	1.87084	1.66732			2.86497	3.78082	7.22114					0.000862228	0.000136697	9.79221e-05	0.000365616		3.61874e-06	3.99442e-06	4.79397e-06	4.13571e-06		88.4046
NM_026042	180	159	205	235	199.667		214	295	881	463.333				0.883333	1.13889	1.30556			1.18889	1.63889	4.89444					0.000413159	8.32156e-05	7.66756e-05	0.000191017		1.50168e-06	1.73148e-06	3.24933e-06	2.16083e-06		88.3997
NM_201638	437	190	172	115	159		300	389	655	448				0.434783	0.393593	0.263158			0.686499	0.89016	1.49886					0.000203359	2.87588e-05	1.54553e-05	8.25245e-05		8.67116e-07	9.40449e-07	9.95062e-07	9.34209e-07		88.3363
NM_025594	180	358	511	343	404		759	554	1510	941				1.98889	2.83889	1.90556			4.21667	3.07778	8.38889					0.000930257	0.00020743	0.000111914	0.000416534		5.32606e-06	3.25165e-06	5.56922e-06	4.71565e-06		88.3301
NM_025417	180	242	273	267	260.667		370	494	1049	637.667				1.34444	1.51667	1.48333			2.05556	2.74444	5.82778					0.000628833	0.000110819	8.71165e-05	0.000275589		2.59637e-06	2.89949e-06	3.86895e-06	3.1216e-06		88.2846
NM_001252448	412	114	142	124	126.667		256	203	401	286.667				0.276699	0.34466	0.300971			0.621359	0.492718	0.973301					0.00012942	2.51834e-05	1.76761e-05	5.74264e-05		7.84838e-07	5.20554e-07	6.46156e-07	6.50516e-07		88.2782
NM_001101502	575	102	145	124	123.667		183	235	397	271.667				0.177391	0.252174	0.215652			0.318261	0.408696	0.690435					8.29707e-05	1.84257e-05	1.26653e-05	3.80206e-05		4.01995e-07	4.31784e-07	4.58367e-07	4.30715e-07		88.2731
NM_011210	1135	4575	6472	3919	4988.67		5892	12962	16693	11849				4.03084	5.7022	3.45286			5.19119	11.4203	14.7075					0.00188533	0.000416645	0.000202788	0.000834921		6.55698e-06	1.20654e-05	9.76402e-06	9.46215e-06		88.238
NM_025485	340	227	264	199	230		284	349	1246	626.333				0.667647	0.776471	0.585294			0.835294	1.02647	3.66471					0.000312276	5.67347e-05	3.43745e-05	0.000134462		1.05506e-06	1.08446e-06	2.43293e-06	1.52415e-06		88.2209
NM_008515	609	183	378	176	245.667		278	466	839	527.667				0.300493	0.62069	0.288998			0.456486	0.765189	1.37767					0.000140548	4.53522e-05	1.69729e-05	6.76245e-05		5.76587e-07	8.08417e-07	9.14608e-07	7.66537e-07		88.2208
NM_001146350	622	366	529	431	442		666	855	1388	969.667				0.588424	0.850482	0.692926			1.07074	1.3746	2.23151					0.000275222	6.21425e-05	4.06957e-05	0.00012602		1.35245e-06	1.45225e-06	1.48146e-06	1.42872e-06		88.2048
NM_011664	286	13609	23224	22899	19910.7		30522	23795	64711	39676				47.5839	81.2028	80.0664			106.72	83.1993	226.262					0.0222563	0.00593327	0.00470232	0.010964		0.000134798	8.78996e-05	0.000150211	0.000124303		88.2035
NM_028771	321	89	133	114	112		197	158	366	240.333				0.277259	0.41433	0.35514			0.613707	0.492212	1.14019					0.000129681	3.0274e-05	2.08575e-05	6.02709e-05		7.75172e-07	5.20019e-07	7.56948e-07	6.84047e-07		88.1094
NM_026660	437	344	259	283	295.333		642	545	1272	819.667				0.787185	0.592677	0.647597			1.46911	1.24714	2.91076					0.000368188	4.33054e-05	3.80335e-05	0.000149842		1.85563e-06	1.3176e-06	1.9324e-06	1.70187e-06		88.0455
NM_001113248	274	519	759	674	650.667		845	781	2932	1519.33				1.89416	2.77007	2.45985			3.08394	2.85036	10.7007					0.00088595	0.000202402	0.000144468	0.00041094		3.89532e-06	3.01139e-06	7.10401e-06	4.67024e-06		87.9911
NM_027400	498	1031	1289	813	1044.33		1748	2327	3667	2580.67				2.07028	2.58835	1.63253			3.51004	4.67269	7.36345					0.000968326	0.000189124	9.58789e-05	0.000417776		4.43353e-06	4.93667e-06	4.88846e-06	4.75288e-06		87.8996
NM_027946	323	417	728	723	622.667		502	910	2579	1330.33				1.29102	2.25387	2.23839			1.55418	2.81734	7.98452					0.000603845	0.000164684	0.000131461	0.000299997		1.96308e-06	2.9765e-06	5.30077e-06	3.41345e-06		87.8867
NM_009848	491	243	576	239	352.667		420	767	892	693				0.494908	1.17312	0.486762			0.855397	1.56212	1.8167					0.000231482	8.57165e-05	2.85876e-05	0.000115262		1.08045e-06	1.65037e-06	1.20607e-06	1.3123e-06		87.8322
NM_001013374	328	61	163	79	101		126	153	290	189.667				0.185976	0.496951	0.240854			0.384146	0.466463	0.884146					8.69858e-05	3.63109e-05	1.41454e-05	4.5814e-05		4.85215e-07	4.92816e-07	5.86968e-07	5.21666e-07		87.8225
NM_001242419	304	335	390	316	347		692	605	1217	838				1.10197	1.28289	1.03947			2.27632	1.99013	4.00329					0.000515423	9.37377e-05	6.10486e-05	0.000223403		2.87521e-06	2.10256e-06	2.65771e-06	2.54516e-06		87.7756
NM_001082960	1135	11792	16800	8363	12318.3		19410	32752	35105	29089				10.3894	14.8018	7.36828			17.1013	28.8564	30.9295					0.00485941	0.00108153	0.000432741	0.00212456		2.16007e-05	3.04866e-05	2.05335e-05	2.42069e-05		87.7666
NM_019458	516	365	535	612	504		573	680	2050	1101				0.707364	1.03682	1.18605			1.11047	1.31783	3.97287					0.000330853	7.57578e-05	6.96568e-05	0.000158756		1.40263e-06	1.39228e-06	2.63751e-06	1.81081e-06		87.6715
NM_001252449	363	106	123	116	115		228	189	389	268.667				0.292011	0.338843	0.319559			0.628099	0.520661	1.07163					0.000136581	2.47584e-05	1.87678e-05	6.00359e-05		7.93351e-07	5.50075e-07	7.11432e-07	6.84953e-07		87.6496
NM_028352	523	168	213	151	177.333		186	414	759	453				0.321224	0.407266	0.288719			0.355641	0.791587	1.45124					0.000150245	2.97578e-05	1.69565e-05	6.56531e-05		4.49209e-07	8.36307e-07	9.63453e-07	7.49656e-07		87.5776
NM_001199350	98	2201	2472	2088	2253.67		3515	4082	9763	5786.67				22.4592	25.2245	21.3061			35.8673	41.6531	99.6224					0.0105048	0.00184309	0.00125131	0.00453305		4.5304e-05	4.40062e-05	6.61375e-05	5.18159e-05		87.4839
NM_026724	98	2201	2472	2088	2253.67		3515	4082	9763	5786.67				22.4592	25.2245	21.3061			35.8673	41.6531	99.6224					0.0105048	0.00184309	0.00125131	0.00453305		4.5304e-05	4.40062e-05	6.61375e-05	5.18159e-05		87.4839
NM_001005859	98	2201	2472	2088	2253.67		3515	4082	9763	5786.67				22.4592	25.2245	21.3061			35.8673	41.6531	99.6224					0.0105048	0.00184309	0.00125131	0.00453305		4.5304e-05	4.40062e-05	6.61375e-05	5.18159e-05		87.4839
NM_001081957	57	327	322	270	306.333		405	674	1475	851.333				5.73684	5.64912	4.73684			7.10526	11.8246	25.8772					0.00268328	0.000412767	0.000278196	0.00112475		8.97465e-06	1.24926e-05	1.71794e-05	1.28822e-05		87.3101
NM_011156	691	1048	981	638	889		1753	2282	3377	2470.67				1.51664	1.41968	0.9233			2.5369	3.30246	4.88712					0.000709374	0.000103732	5.42256e-05	0.000289111		3.20436e-06	3.48903e-06	3.24447e-06	3.31262e-06		87.2756
NM_008187	174	124	114	72	103.333		150	190	630	323.333				0.712644	0.655172	0.413793			0.862069	1.09195	3.62069					0.000333323	4.78717e-05	2.43022e-05	0.000135165		1.08888e-06	1.15364e-06	2.40371e-06	1.54874e-06		87.2743
NM_026316	449	578	644	457	559.667		1120	879	2413	1470.67				1.28731	1.4343	1.01782			2.49443	1.95768	5.37416					0.000602107	0.0001048	5.97767e-05	0.000255561		3.15071e-06	2.06828e-06	3.56781e-06	2.92893e-06		87.2541
NM_172639	184	182	160	113	151.667		332	184	862	459.333				0.98913	0.869565	0.61413			1.80435	1	4.68478					0.000462643	6.35368e-05	3.6068e-05	0.000187416		2.27907e-06	1.05649e-06	3.11014e-06	2.14857e-06		87.2283
NM_018864	258	240	405	291	312		409	559	1077	681.667				0.930233	1.56977	1.12791			1.58527	2.16667	4.17442					0.000435095	0.000114699	6.62423e-05	0.000205345		2.00235e-06	2.28907e-06	2.77132e-06	2.35425e-06		87.2233
NM_001177353	434	460	669	454	527.667		554	1220	2025	1266.33				1.05991	1.54147	1.04608			1.2765	2.81106	4.6659					0.000495747	0.000112631	6.14367e-05	0.000223272		1.61234e-06	2.96987e-06	3.0976e-06	2.55994e-06		87.2177
NM_010849	435	460	669	454	527.667		555	1220	2025	1266.67				1.05747	1.53793	1.04368			1.27586	2.8046	4.65517					0.000494608	0.000112373	6.12955e-05	0.000222759		1.61154e-06	2.96304e-06	3.09048e-06	2.55502e-06		87.1847
NM_026960	468	336	406	365	369		497	749	1463	903				0.717949	0.867521	0.779915			1.06197	1.60043	3.12607					0.000335804	6.33875e-05	4.58046e-05	0.000148332		1.34137e-06	1.69084e-06	2.07534e-06	1.70252e-06		87.1252
NM_009829	270	409	285	425	373		699	583	1843	1041.67				1.51481	1.05556	1.57407			2.58889	2.15926	6.82593					0.00070852	7.71267e-05	9.24458e-05	0.000292697		3.27002e-06	2.28124e-06	4.5316e-06	3.36096e-06		87.0875
NM_009091	126	2255	3225	2127	2535.67		3126	4182	11882	6396.67				17.8968	25.5952	16.881			24.8095	33.1905	94.3016					0.00837083	0.00187018	0.000991423	0.00374414		3.13369e-05	3.50655e-05	6.2605e-05	4.30025e-05		87.068
NM_023178	449	110	126	102	112.667		114	217	591	307.333				0.244989	0.280624	0.227171			0.253898	0.483296	1.31626					0.000114588	2.05044e-05	1.33418e-05	4.9478e-05		3.20698e-07	5.106e-07	8.73839e-07	5.68379e-07		87.0512
NM_025662	376	652	513	394	519.667		1060	1089	2578	1575.67				1.73404	1.36436	1.04787			2.81915	2.89628	6.85638					0.000811058	9.96903e-05	6.15418e-05	0.000324097		3.56086e-06	3.0599e-06	4.55182e-06	3.72419e-06		87.0247
NM_026616	147	57	116	187	120		164	102	324	196.667				0.387755	0.789116	1.27211			1.11565	0.693878	2.20408					0.000181363	5.76586e-05	7.47113e-05	0.000104578		1.40917e-06	7.33077e-07	1.46325e-06	1.20183e-06		87.0153
NM_019879	327	442	735	561	579.333		501	1114	2358	1324.33				1.35168	2.24771	1.7156			1.53211	3.40673	7.21101					0.000632218	0.000164234	0.000100757	0.00029907		1.93521e-06	3.59919e-06	4.78725e-06	3.44055e-06		86.925
NM_001085492	1539	146	185	127	152.667		298	242	595	378.333				0.0948668	0.120208	0.0825211			0.193632	0.157245	0.386615					4.43717e-05	8.78328e-06	4.84649e-06	1.93338e-05		2.44577e-07	1.66128e-07	2.56666e-07	2.22457e-07		86.9104
NM_029711	281	6806	6179	3593	5526		10729	11533	27997	16753				24.2206	21.9893	12.7865			38.1815	41.0427	99.6335					0.0113286	0.0016067	0.000750953	0.0045621		4.8227e-05	4.33614e-05	6.61448e-05	5.25777e-05		86.7687
NM_033575	909	88	117	95	100		183	143	385	237				0.0968097	0.128713	0.10451			0.20132	0.157316	0.423542					4.52805e-05	9.40471e-06	6.13793e-06	2.02744e-05		2.54287e-07	1.66203e-07	2.81182e-07	2.33891e-07		86.6831
NM_027534	313	123	144	88	118.333		196	202	579	325.667				0.392971	0.460064	0.28115			0.626198	0.645367	1.84984					0.000183803	3.36157e-05	1.6512e-05	7.7977e-05		7.9095e-07	6.81827e-07	1.22807e-06	9.00283e-07		86.6138
NM_175300	818	744	1131	939	938		1550	1725	2757	2010.67				0.909535	1.38264	1.14792			1.89487	2.1088	3.37042					0.000425414	0.000101026	6.74177e-05	0.000197953		2.3934e-06	2.22794e-06	2.23755e-06	2.2863e-06		86.5822
NM_007991	308	625	609	452	562		1132	1254	2175	1520.33				2.02922	1.97727	1.46753			3.67532	4.07143	7.06169					0.000949121	0.000144474	8.61886e-05	0.000393261		4.6423e-06	4.30144e-06	4.68812e-06	4.54395e-06		86.5461
NM_010512	140	1474	2108	1382	1654.67		3024	2540	6316	3960				10.5286	15.0571	9.87143			21.6	18.1429	45.1143					0.0049245	0.00110019	0.000579751	0.00220148		2.72829e-05	1.91678e-05	2.99505e-05	2.54671e-05		86.444
NM_134150	252	780	750	632	720.667		1098	1411	3625	2044.67				3.09524	2.97619	2.50794			4.35714	5.59921	14.3849					0.00144773	0.000217462	0.000147292	0.00060416		5.5035e-06	5.91553e-06	9.54988e-06	6.98963e-06		86.4366
NM_133969	506	599	541	314	484.667		1058	1179	2007	1414.67				1.18379	1.06917	0.620553			2.09091	2.33004	3.9664					0.000553692	7.81214e-05	3.64453e-05	0.000222753		2.64102e-06	2.46167e-06	2.63322e-06	2.57864e-06		86.384
NM_175675	353	776	881	629	762		1566	1574	2612	1917.33				2.1983	2.49575	1.78187			4.43626	4.45892	7.39943					0.0010282	0.000182358	0.00010465	0.000438404		5.60343e-06	4.71083e-06	4.91234e-06	5.07553e-06		86.3759
NM_007924	583	94	132	106	110.667		149	208	429	262				0.161235	0.226415	0.181818			0.255575	0.356775	0.735849					7.54139e-05	1.65436e-05	1.06782e-05	3.42119e-05		3.22816e-07	3.76931e-07	4.88516e-07	3.96088e-07		86.3746
NM_001081356	82	246	355	337	312.667		337	728	1007	690.667				3	4.32927	4.10976			4.10976	8.87805	12.2805					0.00140318	0.000316328	0.000241367	0.000653625		5.19103e-06	9.3796e-06	8.15278e-06	7.57447e-06		86.2932
NM_001159599	695	419	255	189	287.667		675	789	1401	955				0.602878	0.366906	0.271942			0.971223	1.13525	2.01583					0.000281982	2.68089e-05	1.59712e-05	0.000108254		1.22675e-06	1.19939e-06	1.33827e-06	1.2548e-06		86.2718
NM_023240	262	598	988	736	774		1287	804	3171	1754				2.28244	3.77099	2.80916			4.91221	3.0687	12.1031					0.00106756	0.000275536	0.000164983	0.000502693		6.20461e-06	3.24207e-06	8.03499e-06	5.82722e-06		86.2663
NM_001024504	240	95	122	88	101.667		163	190	410	254.333				0.395833	0.508333	0.366667			0.679167	0.791667	1.70833					0.000185142	3.71426e-05	2.15344e-05	8.1273e-05		8.57854e-07	8.36391e-07	1.13413e-06	9.42792e-07		86.2046
NM_145554	289	505	568	508	527		793	865	2495	1384.33				1.7474	1.9654	1.75779			2.74394	2.99308	8.63322					0.000817308	0.000143606	0.000103235	0.000354717		3.46587e-06	3.16217e-06	5.73143e-06	4.11982e-06		86.0999
NM_016903	263	3496	6437	5012	4981.67		3727	9512	19762	11000.3				13.2928	24.4753	19.057			14.1711	36.1673	75.1407					0.00621739	0.00178834	0.00111922	0.00304165		1.78995e-05	3.82105e-05	4.98845e-05	3.53315e-05		86.089
NM_025401	54	480	962	716	719.333		1259	859	2133	1417				8.88889	17.8148	13.2593			23.3148	15.9074	39.5					0.00415757	0.00130168	0.00077872	0.00207932		2.94489e-05	1.68061e-05	2.62233e-05	2.41594e-05		86.0668
NM_026468	127	836	1360	1242	1146		1699	1482	4269	2483.33				6.58268	10.7087	9.77953			13.378	11.6693	33.6142					0.00307889	0.000782454	0.000574354	0.00147857		1.68977e-05	1.23285e-05	2.23158e-05	1.71807e-05		86.0599
NM_198645	125	91	194	105	130		127	190	558	291.667				0.728	1.552	0.84			1.016	1.52	4.464					0.000340505	0.000113401	4.93334e-05	0.000167746		1.28331e-06	1.60587e-06	2.96356e-06	1.95091e-06		85.9835
NM_134020	208	284	370	287	313.667		416	400	1669	828.333				1.36538	1.77885	1.37981			2	1.92308	8.02404					0.000638627	0.000129976	8.10365e-05	0.000283213		2.5262e-06	2.03172e-06	5.32701e-06	3.29497e-06		85.953
NM_010299	174	994	1294	982	1090		1546	2312	4195	2684.33				5.71264	7.43678	5.64368			8.88506	13.2874	24.1092					0.00267196	0.000543386	0.000331455	0.00118227		1.12227e-05	1.4038e-05	1.60056e-05	1.37554e-05		85.9489
NM_010281	298	443	540	331	438		848	849	1700	1132.33				1.48658	1.81208	1.11074			2.84564	2.84899	5.7047					0.000695312	0.000132404	6.52339e-05	0.00029765		3.59432e-06	3.00994e-06	3.78724e-06	3.46383e-06		85.9308
NM_001252549	168	323	395	349	355.667		423	725	1557	901.667				1.92262	2.35119	2.07738			2.51786	4.31548	9.26786					0.000899261	0.000171795	0.000122005	0.000397687		3.1803e-06	4.55927e-06	6.15275e-06	4.63078e-06		85.8791
NM_001252548	168	323	395	349	355.667		423	725	1557	901.667				1.92262	2.35119	2.07738			2.51786	4.31548	9.26786					0.000899261	0.000171795	0.000122005	0.000397687		3.1803e-06	4.55927e-06	6.15275e-06	4.63078e-06		85.8791
NM_144832	168	323	395	349	355.667		423	725	1557	901.667				1.92262	2.35119	2.07738			2.51786	4.31548	9.26786					0.000899261	0.000171795	0.000122005	0.000397687		3.1803e-06	4.55927e-06	6.15275e-06	4.63078e-06		85.8791
NM_028181	619	180	233	135	182.667		234	441	768	481				0.290792	0.376414	0.218094			0.378029	0.712439	1.24071					0.000136011	2.75035e-05	1.28087e-05	5.87744e-05		4.77488e-07	7.52688e-07	8.23684e-07	6.8462e-07		85.8497
NM_013635	242	1227	1326	943	1165.33		2143	2668	4424	3078.33				5.07025	5.47934	3.89669			8.85537	11.0248	18.281					0.00237149	0.000400361	0.000228854	0.00100024		1.11852e-05	1.16476e-05	1.21364e-05	1.16564e-05		85.8099
NM_001162996	630	261	235	231	242.333		664	352	860	625.333				0.414286	0.373016	0.366667			1.05397	0.55873	1.36508					0.000193773	2.72553e-05	2.15344e-05	8.08541e-05		1.33127e-06	5.90295e-07	9.0625e-07	9.42604e-07		85.7774
NM_007573	260	493	632	494	539.667		791	1196	1962	1316.33				1.89615	2.43077	1.9			3.04231	4.6	7.54615					0.000886882	0.00017761	0.000111587	0.000392026		3.84273e-06	4.85987e-06	5.00975e-06	4.57078e-06		85.7679
NM_145211	348	1519	1331	780	1210		4249	1962	3788	3333				4.36494	3.82471	2.24138			12.2098	5.63793	10.8851					0.0020416	0.000279462	0.000131637	0.000817566		1.54221e-05	5.95644e-06	7.22638e-06	9.53499e-06		85.7438
NM_001081086	733	429	460	256	381.667		1127	794	973	964.667				0.585266	0.627558	0.34925			1.53752	1.08322	1.32742					0.000273745	4.5854e-05	2.05115e-05	0.00011337		1.94204e-06	1.14441e-06	8.8125e-07	1.32257e-06		85.7197
NM_198710	224	1222	1306	920	1149.33		2134	2652	4398	3061.33				5.45536	5.83036	4.10714			9.52679	11.8393	19.6339					0.00255162	0.000426009	0.000241214	0.00107295		1.20333e-05	1.25081e-05	1.30346e-05	1.25253e-05		85.6621
NM_007502	259	1428	2546	1958	1977.33		1852	3658	7694	4401.33				5.51351	9.83012	7.55985			7.15058	14.1236	29.7066					0.00257882	0.000718261	0.000443992	0.00124702		9.03188e-06	1.49214e-05	1.97216e-05	1.45583e-05		85.6571
NM_175438	543	106	115	88	103		182	224	408	271.333				0.195212	0.211786	0.162063			0.335175	0.412523	0.751381					9.13058e-05	1.54747e-05	9.51798e-06	3.87661e-05		4.23359e-07	4.35828e-07	4.98828e-07	4.52672e-07		85.6386
NM_026446	197	186	340	237	254.333		466	326	807	533				0.944162	1.72589	1.20305			2.36548	1.65482	4.09645					0.00044161	0.000126106	7.06552e-05	0.00021279		2.98784e-06	1.74831e-06	2.71955e-06	2.48523e-06		85.6219
NM_008607	453	100	256	130	162		150	355	436	313.667				0.220751	0.565121	0.286976			0.331126	0.783664	0.962472					0.000103251	4.12919e-05	1.68542e-05	5.3799e-05		4.18244e-07	8.27937e-07	6.38967e-07	6.28383e-07		85.615
NM_001159422	115	91	183	100	124.667		123	186	558	289				0.791304	1.5913	0.869565			1.06957	1.61739	4.85217					0.000370114	0.000116272	5.10698e-05	0.000179152		1.35097e-06	1.70876e-06	3.22127e-06	2.09367e-06		85.5687
NM_010579	226	387	581	460	476		534	853	2036	1141				1.71239	2.5708	2.0354			2.36283	3.77434	9.00885					0.00080093	0.000187841	0.000119539	0.000369437		2.98449e-06	3.98756e-06	5.9808e-06	4.31762e-06		85.565
NM_001134426	216	195	203	120	172.667		348	338	791	492.333				0.902778	0.939815	0.555556			1.61111	1.56481	3.66204					0.000422253	6.86698e-05	3.26279e-05	0.000174517		2.03499e-06	1.65322e-06	2.43116e-06	2.03979e-06		85.5564
NM_178016	423	622	495	381	499.333		971	1089	2574	1544.67				1.47045	1.17021	0.900709			2.29551	2.57447	6.08511					0.000687769	8.55044e-05	5.28989e-05	0.000275391		2.89945e-06	2.71991e-06	4.03979e-06	3.21972e-06		85.5326
NM_145416	686	258	262	240	253.333		508	417	1081	668.667				0.376093	0.381924	0.349854			0.740525	0.607872	1.5758					0.000175909	2.79062e-05	2.0547e-05	7.47874e-05		9.35356e-07	6.42213e-07	1.04614e-06	8.74571e-07		85.5132
NM_133761	583	115	187	152	151.333		169	232	655	352				0.197256	0.320755	0.26072			0.28988	0.397942	1.1235					9.22617e-05	2.34367e-05	1.53122e-05	4.36702e-05		3.66147e-07	4.20423e-07	7.4587e-07	5.10813e-07		85.4915
NM_027395	207	221	551	509	427		513	310	1591	804.667				1.06763	2.66184	2.45894			2.47826	1.49758	7.68599					0.000499361	0.000194493	0.000144414	0.000279423		3.13029e-06	1.58219e-06	5.10258e-06	3.27169e-06		85.4063
NM_144526	212	71	188	198	152.333		93	234	484	270.333				0.334906	0.886792	0.933962			0.438679	1.10377	2.28302					0.000156644	6.47956e-05	5.48518e-05	9.20973e-05		5.54095e-07	1.16613e-06	1.51565e-06	1.07863e-06		85.3839
NM_027156	620	107	109	89	101.667		202	215	390	269				0.172581	0.175806	0.143548			0.325806	0.346774	0.629032					8.07206e-05	1.28457e-05	8.43063e-06	3.3999e-05		4.11526e-07	3.66365e-07	4.17603e-07	3.98498e-07		85.3179
NM_025465	202	179	118	83	126.667		507	179	467	384.333				0.886139	0.584158	0.410891			2.5099	0.886139	2.31188					0.000414471	4.26829e-05	2.41317e-05	0.000160428		3.17025e-06	9.362e-07	1.53481e-06	1.88042e-06		85.3152
NM_019443	51	101	354	235	230		587	108	246	313.667				1.98039	6.94118	4.60784			11.5098	2.11765	4.82353					0.000926283	0.000507173	0.00027062	0.000568025		1.4538e-05	2.23728e-06	3.20225e-06	6.65918e-06		85.2996
NM_001190179	289	164	209	188	187		234	329	851	471.333				0.567474	0.723183	0.650519			0.809689	1.13841	2.94464					0.000265423	5.28411e-05	3.82051e-05	0.000118823		1.02272e-06	1.20272e-06	1.95489e-06	1.39344e-06		85.273
NM_001136055	247	372	416	198	328.667		1037	552	966	851.667				1.50607	1.68421	0.801619			4.19838	2.23482	3.91093					0.000704431	0.000123061	4.70793e-05	0.000291524		5.30297e-06	2.36107e-06	2.59639e-06	3.42014e-06		85.2372
NM_007656	247	372	416	198	328.667		1037	552	966	851.667				1.50607	1.68421	0.801619			4.19838	2.23482	3.91093					0.000704431	0.000123061	4.70793e-05	0.000291524		5.30297e-06	2.36107e-06	2.59639e-06	3.42014e-06		85.2372
NM_025875	154	242	386	210	279.333		597	494	797	629.333				1.57143	2.50649	1.36364			3.87662	3.20779	5.17532					0.000734999	0.000183143	8.00867e-05	0.000332743		4.89656e-06	3.38901e-06	3.4358e-06	3.90712e-06		85.1632
NM_007881	1156	78	128	156	120.667		99	214	444	252.333				0.067474	0.110727	0.134948			0.0856401	0.185121	0.384083					3.15594e-05	8.0905e-06	7.92554e-06	1.58585e-05		1.08172e-07	1.95579e-07	2.54985e-07	1.86246e-07		85.1483
NM_010022	463	145	127	86	119.333		273	305	449	342.333				0.313175	0.274298	0.185745			0.589633	0.658747	0.969762					0.00014648	2.00422e-05	1.09089e-05	5.91438e-05		7.44764e-07	6.95963e-07	6.43807e-07	6.94845e-07		85.118
NM_011206	434	203	198	224	208.333		381	343	899	541				0.467742	0.456221	0.516129			0.87788	0.790323	2.07143					0.000218775	3.33349e-05	3.03124e-05	9.41409e-05		1.10885e-06	8.34971e-07	1.37518e-06	1.10633e-06		85.0927
NM_025606	232	159	259	209	209		179	337	992	502.667				0.685345	1.11638	0.900862			0.771552	1.45259	4.27586					0.000320554	8.15709e-05	5.29079e-05	0.000151678		9.74546e-07	1.53465e-06	2.83866e-06	1.78262e-06		85.087
NM_011779	455	2161	1922	1468	1850.33		2764	3779	10634	5725.67				4.74945	4.22418	3.22637			6.07473	8.30549	23.3714					0.00222145	0.000308649	0.000189486	0.000906527		7.67298e-06	8.7747e-06	1.55158e-05	1.06545e-05		85.0839
NM_011873	149	1029	2008	1729	1588.67		1507	2729	5708	3314.67				6.90604	13.4765	11.604			10.1141	18.3154	38.3087					0.00323014	0.000984693	0.000681507	0.00163211		1.27751e-05	1.93501e-05	2.54324e-05	1.91859e-05		85.0684
NM_027091	306	164	219	194	192.333		237	332	865	478				0.535948	0.715686	0.633987			0.77451	1.08497	2.8268					0.000250677	5.22933e-05	3.72342e-05	0.000113402		9.78282e-07	1.14626e-06	1.87666e-06	1.33373e-06		85.0256
NM_025546	433	789	917	646	784		1167	1971	3047	2061.67				1.82217	2.11778	1.49192			2.69515	4.55196	7.03695					0.000852278	0.000154741	8.76207e-05	0.00036488		3.40424e-06	4.80912e-06	4.6717e-06	4.29502e-06		84.9542
NM_023876	403	125	111	74	103.333		142	216	644	334				0.310174	0.275434	0.183623			0.352357	0.53598	1.59801					0.000145077	2.01253e-05	1.07842e-05	5.8662e-05		4.45062e-07	5.6626e-07	1.06089e-06	6.90738e-07		84.9266
NM_026111	364	138	134	126	132.667		216	329	516	353.667				0.379121	0.368132	0.346154			0.593407	0.903846	1.41758					0.000177325	2.68984e-05	2.03297e-05	7.4851e-05		7.49531e-07	9.54908e-07	9.41106e-07	8.81848e-07		84.8797
NM_001199276	575	291	218	227	245.333		715	383	965	687.667				0.506087	0.37913	0.394783			1.24348	0.666087	1.67826					0.00023671	2.77021e-05	2.31857e-05	9.58661e-05		1.57064e-06	7.03717e-07	1.11417e-06	1.12951e-06		84.8743
NM_199199	189	127	174	152	151		257	219	601	359				0.671958	0.920635	0.804233			1.35979	1.15873	3.17989					0.000314293	6.72684e-05	4.72328e-05	0.000142931		1.71755e-06	1.22419e-06	2.11107e-06	1.68427e-06		84.8625
NM_001199948	87	500	876	728	701.333		1234	786	2453	1491				5.74713	10.069	8.36782			14.1839	9.03448	28.1954					0.00268809	0.000735713	0.000491444	0.00130508		1.79157e-05	9.54488e-06	1.87184e-05	1.5393e-05		84.7842
NM_009279	153	742	1006	717	821.667		1805	1181	2908	1964.67				4.84967	6.57516	4.68627			11.7974	7.71895	19.0065					0.00226832	0.00048043	0.000275226	0.00100799		1.49013e-05	8.15503e-06	1.26181e-05	1.18915e-05		84.7661
NM_025836	418	579	773	505	619		1043	1066	2663	1590.67				1.38517	1.84928	1.20813			2.49522	2.55024	6.37081					0.00064788	0.000135122	7.0954e-05	0.000284652		3.1517e-06	2.69431e-06	4.22946e-06	3.35849e-06		84.7559
NM_001161413	546	4146	4334	3247	3909		7336	10044	13540	10306.7				7.59341	7.93773	5.94689			13.4359	18.3956	24.7985					0.00355164	0.000579989	0.000349262	0.00149363		1.69709e-05	1.94348e-05	1.64633e-05	1.7623e-05		84.7546
NM_010439	196	1680	2962	2091	2244.33		2916	3418	9021	5118.33				8.57143	15.1122	10.6684			14.8776	17.4388	46.0255					0.00400909	0.00110421	0.000626556	0.00191329		1.87918e-05	1.8424e-05	3.05555e-05	2.25904e-05		84.6946
NM_009787	622	1923	2137	1133	1731		3600	4483	5976	4686.33				3.09164	3.43569	1.82154			5.78778	7.2074	9.60772					0.00144604	0.000251037	0.00010698	0.000601353		7.31054e-06	7.61457e-06	6.37838e-06	7.10116e-06		84.6838
NM_007483	177	313	501	252	355.333		839	660	872	790.333				1.76836	2.83051	1.42373			4.74011	3.72881	4.92655					0.00082711	0.000206818	8.3616e-05	0.000372515		5.98723e-06	3.93947e-06	3.27065e-06	4.39911e-06		84.6795
NM_178377	183	405	473	369	415.667		646	867	1762	1091.67				2.21311	2.5847	2.01639			3.53005	4.7377	9.62842					0.00103513	0.000188857	0.000118423	0.000447471		4.45881e-06	5.00536e-06	6.39212e-06	5.28543e-06		84.6613
NM_052835	195	4200	7179	5763	5714		9221	8666	18982	12289.7				21.5385	36.8154	29.5538			47.2872	44.441	97.3436					0.0100741	0.00269	0.0017357	0.00483327		5.97284e-05	4.69517e-05	6.46246e-05	5.71015e-05		84.6435
NM_020558	122	336	343	269	316		583	695	1312	863.333				2.7541	2.81148	2.20492			4.77869	5.69672	10.7541					0.00128817	0.000205427	0.000129495	0.000541029		6.03595e-06	6.01855e-06	7.13944e-06	6.39798e-06		84.5625
NM_008577	507	4058	4257	3202	3839		7098	9979	13349	10142				8.00394	8.39645	6.31558			14	19.6824	26.3294					0.00374366	0.000613506	0.000370916	0.00157603		1.76834e-05	2.07944e-05	1.74796e-05	1.86524e-05		84.4944
NM_029663	641	642	1023	786	817		1350	889	3527	1922				1.00156	1.59594	1.22621			2.10608	1.3869	5.50234					0.000468457	0.000116611	7.20156e-05	0.000219028		2.66019e-06	1.46525e-06	3.6529e-06	2.59278e-06		84.4761
NM_001102650	281	129	111	74	104.667		202	273	480	318.333				0.459075	0.395018	0.263345			0.718861	0.97153	1.70819					0.000214722	2.88629e-05	1.54663e-05	8.63503e-05		9.07992e-07	1.02642e-06	1.13403e-06	1.02281e-06		84.4243
NM_019722	165	107	146	130	127.667		155	228	562	315				0.648485	0.884848	0.787879			0.939394	1.38182	3.40606					0.000303314	6.46535e-05	4.62723e-05	0.00013808		1.18655e-06	1.45988e-06	2.26122e-06	1.63588e-06		84.407
NM_019796	543	1221	1579	1126	1308.67		2203	2981	4505	3229.67				2.24862	2.90792	2.07366			4.05709	5.48987	8.2965					0.00105174	0.000212474	0.000121787	0.000462		5.1245e-06	5.80002e-06	5.50789e-06	5.47747e-06		84.3455
NM_053262	279	1040	1076	849	988.333		1886	1903	4365	2718				3.7276	3.85663	3.04301			6.75986	6.82079	15.6452					0.0017435	0.000281794	0.000178717	0.00073467		8.53836e-06	7.20612e-06	1.03865e-05	8.71034e-06		84.3446
NM_021565	489	227	308	330	288.333		406	424	1198	676				0.464213	0.629857	0.674847			0.830266	0.867076	2.4499					0.000217125	4.6022e-05	3.96339e-05	0.000100927		1.04871e-06	9.1606e-07	1.62644e-06	1.19707e-06		84.3116
NM_026982	94	203	429	433	355		318	452	1387	719				2.15957	4.56383	4.60638			3.38298	4.80851	14.7553					0.00101009	0.000333467	0.000270534	0.000538031		4.27303e-06	5.08016e-06	9.79578e-06	6.38299e-06		84.2913
NM_011189	230	1368	1242	992	1200.67		2715	1935	5863	3504.33				5.94783	5.4	4.31304			11.8043	8.41304	25.4913					0.00278196	0.000394564	0.000253306	0.00114328		1.49101e-05	8.88833e-06	1.69232e-05	1.35739e-05		84.2263
NM_025415	60	77	253	175	168.333		136	207	571	304.667				1.28333	4.21667	2.91667			2.26667	3.45	9.51667					0.000600249	0.000308101	0.000171297	0.000359882		2.86302e-06	3.6449e-06	6.31793e-06	4.27529e-06		84.1773
NM_001001493	87	337	371	277	328.333		553	588	1613	918				3.87356	4.26437	3.18391			6.35632	6.75862	18.5402					0.00181177	0.000311586	0.000186992	0.000770116		8.02866e-06	7.14044e-06	1.23085e-05	9.1592e-06		84.0811
NM_009503	787	3558	6266	4433	4752.33		7135	8787	15146	10356				4.52097	7.96188	5.63278			9.06607	11.1652	19.2452					0.00211458	0.000581754	0.000330815	0.00100905		1.14513e-05	1.17959e-05	1.27765e-05	1.20079e-05		84.0317
NM_007466	485	1175	1210	817	1067.33		2339	2109	4493	2980.33				2.42268	2.49485	1.68454			4.82268	4.34845	9.26392					0.00113315	0.000182292	9.89332e-05	0.000471459		6.09152e-06	4.59411e-06	6.15014e-06	5.61192e-06		84.0103
NM_026456	93	299	587	395	427		817	634	1131	860.667				3.21505	6.31183	4.24731			8.78495	6.8172	12.1613					0.00150377	0.000461189	0.000249446	0.000738134		1.10963e-05	7.20233e-06	8.07365e-06	8.79075e-06		83.9671
NM_007533	427	160	272	241	224.333		273	319	926	506				0.374707	0.637002	0.564403			0.639344	0.747073	2.16862					0.000175261	4.65441e-05	3.31475e-05	8.49841e-05		8.07555e-07	7.89278e-07	1.4397e-06	1.01218e-06		83.9615
NM_010183	447	101	139	160	133.333		254	234	343	277				0.225951	0.310962	0.357942			0.568233	0.52349	0.767338					0.000105683	2.27212e-05	2.1022e-05	4.98088e-05		7.17734e-07	5.53064e-07	5.09421e-07	5.93406e-07		83.9371
NM_016742	360	914	1060	784	919.333		1777	1834	3591	2400.67				2.53889	2.94444	2.17778			4.93611	5.09444	9.975					0.00118751	0.000215143	0.000127901	0.000510184		6.23479e-06	5.38225e-06	6.62221e-06	6.07975e-06		83.9152
NM_178901	206	148	160	193	167		168	407	689	421.333				0.718447	0.776699	0.936893			0.815534	1.97573	3.34466					0.000336037	5.67514e-05	5.5024e-05	0.000149271		1.0301e-06	2.08734e-06	2.22046e-06	1.7793e-06		83.8929
NM_027107	142	120	173	111	134.667		170	123	833	375.333				0.84507	1.21831	0.78169			1.19718	0.866197	5.8662					0.000395262	8.90187e-05	4.59089e-05	0.00017673		1.51216e-06	9.15132e-07	3.89446e-06	2.10725e-06		83.8676
NM_010559	441	190	233	136	186.333		427	393	608	476				0.430839	0.528345	0.30839			0.968254	0.891156	1.37868					0.000201515	3.86048e-05	1.81118e-05	8.60772e-05		1.223e-06	9.41501e-07	9.15283e-07	1.02659e-06		83.8473
NM_153055	741	405	685	344	478		809	1166	1274	1083				0.546559	0.924426	0.464238			1.09177	1.57355	1.7193					0.00025564	6.75454e-05	2.72648e-05	0.000116817		1.37901e-06	1.66245e-06	1.14141e-06	1.39429e-06		83.7824
NM_016665	59	124	189	187	166.667		218	309	582	369.667				2.10169	3.20339	3.16949			3.69492	5.23729	9.86441					0.000983019	0.000234063	0.000186145	0.000467742		4.66704e-06	5.53316e-06	6.54879e-06	5.583e-06		83.7798
NM_021327	628	291	225	233	249.667		722	391	993	702				0.463376	0.35828	0.371019			1.14968	0.622611	1.58121					0.000216733	2.61786e-05	2.179e-05	8.8234e-05		1.45216e-06	6.57785e-07	1.04974e-06	1.05323e-06		83.7749
NM_001199275	628	291	225	233	249.667		722	391	993	702				0.463376	0.35828	0.371019			1.14968	0.622611	1.58121					0.000216733	2.61786e-05	2.179e-05	8.8234e-05		1.45216e-06	6.57785e-07	1.04974e-06	1.05323e-06		83.7749
NM_009810	258	174	370	237	260.333		384	408	822	538				0.674419	1.43411	0.918605			1.48837	1.5814	3.18605					0.000315444	0.000104787	5.39499e-05	0.00015806		1.87996e-06	1.67073e-06	2.11516e-06	1.88862e-06		83.6909
NM_172687	351	131	134	93	119.333		203	285	538	342				0.373219	0.381766	0.264957			0.578348	0.811966	1.53276					0.000174565	2.78947e-05	1.5561e-05	7.26735e-05		7.3051e-07	8.57837e-07	1.01757e-06	8.6864e-07		83.6635
NM_019726	308	177	226	145	182.667		348	290	818	485.333				0.574675	0.733766	0.470779			1.12987	0.941558	2.65584					0.000268791	5.36144e-05	2.7649e-05	0.000116685		1.42714e-06	9.94751e-07	1.76316e-06	1.39502e-06		83.644
NM_019666	604	1218	1594	1137	1316.33		2201	3091	4471	3254.33				2.01656	2.63907	1.88245			3.64404	5.11755	7.40232					0.000943198	0.00019283	0.000110557	0.000415528		4.60278e-06	5.40666e-06	4.91426e-06	4.97457e-06		83.5305
NM_001042707	879	240	412	323	325		428	619	1111	719.333				0.273038	0.468714	0.367463			0.486917	0.704209	1.26394					0.000127707	3.42477e-05	2.15812e-05	6.11786e-05		6.15024e-07	7.43993e-07	8.39103e-07	7.32707e-07		83.4968
NM_021394	392	165	161	59	128.333		509	217	354	360				0.420918	0.410714	0.15051			1.29847	0.553571	0.903061					0.000196875	3.00098e-05	8.8395e-06	7.85747e-05		1.64009e-06	5.84845e-07	5.99525e-07	9.41488e-07		83.458
NM_001039151	346	5652	9193	6556	7133.67		10825	13659	24518	16334				16.3353	26.5694	18.948			31.2861	39.4769	70.8613					0.00764044	0.00194135	0.00111282	0.00356487		3.95175e-05	4.17071e-05	4.70435e-05	4.2756e-05		83.3771
NM_019965	357	147	220	152	173		178	329	832	446.333				0.411765	0.616246	0.42577			0.498599	0.921569	2.33053					0.000192593	4.50275e-05	2.50056e-05	8.75422e-05		6.2978e-07	9.73632e-07	1.5472e-06	1.0502e-06		83.3574
NM_001033393	477	369	606	328	434.333		806	873	1348	1009				0.773585	1.27044	0.687631			1.68973	1.83019	2.826					0.000361826	9.28277e-05	4.03847e-05	0.000165013		2.13429e-06	1.93358e-06	1.87612e-06	1.98133e-06		83.2838
NM_010908	340	169	119	111	133		371	249	603	407.667				0.497059	0.35	0.326471			1.09118	0.732353	1.77353					0.000232488	2.55736e-05	1.91737e-05	9.24117e-05		1.37826e-06	7.73726e-07	1.17741e-06	1.1098e-06		83.2687
NM_001081633	460	102	112	105	106.333		228	128	486	280.667				0.221739	0.243478	0.228261			0.495652	0.278261	1.05652					0.000103713	1.77903e-05	1.34058e-05	4.49698e-05		6.26057e-07	2.93981e-07	7.01405e-07	5.40481e-07		83.2033
NM_009112	78	1738	3048	1955	2247		2894	3806	9293	5331				22.2821	39.0769	25.0641			37.1026	48.7949	119.141					0.0104219	0.00285525	0.00147202	0.00491639		4.68642e-05	5.15515e-05	7.90955e-05	5.91704e-05		83.0888
NM_010119	515	1309	1677	977	1321		2836	2756	4588	3393.33				2.54175	3.25631	1.89709			5.5068	5.35146	8.90874					0.00118884	0.00023793	0.000111416	0.00051273		6.95562e-06	5.65378e-06	5.91434e-06	6.17458e-06		83.0388
NM_028412	826	149	138	95	127.333		267	266	617	383.333				0.180387	0.16707	0.115012			0.323245	0.322034	0.746973					8.4372e-05	1.22074e-05	6.75469e-06	3.44447e-05		4.0829e-07	3.40227e-07	4.95901e-07	4.14806e-07		83.0381
NM_028343	439	517	545	499	520.333		904	1122	2137	1387.67				1.17768	1.24146	1.13667			2.05923	2.55581	4.86788					0.000550831	9.07101e-05	6.67572e-05	0.000236099		2.601e-06	2.7002e-06	3.23169e-06	2.8443e-06		83.008
NM_016776	1325	1730	1826	1289	1615		3362	3436	6615	4471				1.30566	1.37811	0.97283			2.53736	2.59321	4.99245					0.000610692	0.000100695	5.71346e-05	0.000256174		3.20493e-06	2.73971e-06	3.31439e-06	3.08635e-06		83.0024
NM_001127338	492	115	277	150	180.667		246	263	618	375.667				0.23374	0.563008	0.304878			0.5	0.534553	1.2561					0.000109326	4.11375e-05	1.79056e-05	5.61232e-05		6.31549e-07	5.64752e-07	8.33899e-07	6.76733e-07		82.9324
NM_178162	460	127	160	172	153		174	318	639	377				0.276087	0.347826	0.373913			0.378261	0.691304	1.38913					0.000129133	2.54147e-05	2.196e-05	5.8836e-05		4.77781e-07	7.30359e-07	9.22217e-07	7.10119e-07		82.8537
NM_025459	337	725	472	348	515		2028	895	1889	1604				2.15134	1.40059	1.03264			6.0178	2.65579	5.60534					0.00100624	0.000102338	6.06473e-05	0.000389741		7.60108e-06	2.80582e-06	3.72128e-06	4.70939e-06		82.7582
NM_011520	423	2124	1667	813	1534.67		4119	4254	6567	4980				5.02128	3.9409	1.92199			9.73759	10.0567	15.5248					0.00234859	0.000287951	0.000112879	0.000916472		1.22995e-05	1.06249e-05	1.03066e-05	1.1077e-05		82.7363
NM_010925	475	663	818	619	700		1437	1018	3043	1832.67				1.39579	1.72211	1.30316			3.02526	2.14316	6.40632					0.000652848	0.00012583	7.65348e-05	0.000285071		3.8212e-06	2.26423e-06	4.25303e-06	3.44616e-06		82.7214
NM_001177352	420	422	635	435	497.333		512	1210	2006	1242.67				1.00476	1.5119	1.03571			1.21905	2.88095	4.77619					0.000469954	0.000110471	6.08278e-05	0.000213751		1.53978e-06	3.04371e-06	3.17082e-06	2.58477e-06		82.6963
NM_001177354	420	422	635	435	497.333		512	1210	2006	1242.67				1.00476	1.5119	1.03571			1.21905	2.88095	4.77619					0.000469954	0.000110471	6.08278e-05	0.000213751		1.53978e-06	3.04371e-06	3.17082e-06	2.58477e-06		82.6963
NM_012015	353	540	645	427	537.333		1087	928	2371	1462				1.52975	1.8272	1.20963			3.07932	2.6289	6.71671					0.000715503	0.000133508	7.1042e-05	0.000306684		3.88948e-06	2.77741e-06	4.4591e-06	3.70866e-06		82.694
NM_029814	200	585	875	613	691		814	1164	3405	1794.33				2.925	4.375	3.065			4.07	5.82	17.025					0.0013681	0.00031967	0.000180008	0.000622593		5.14081e-06	6.14879e-06	1.13026e-05	7.53073e-06		82.6737
NM_010922	187	254	262	195	237		266	503	1416	728.333				1.35829	1.40107	1.04278			1.42246	2.68984	7.57219					0.000635308	0.000102372	6.12428e-05	0.000266308		1.79671e-06	2.8418e-06	5.02703e-06	3.22185e-06		82.6569
NM_010493	518	899	755	1151	935		2491	1325	3070	2295.33				1.73552	1.45753	2.22201			4.80888	2.55792	5.92664					0.00081175	0.000106498	0.000130499	0.000349582		6.07409e-06	2.70242e-06	3.93458e-06	4.23703e-06		82.5064
NM_207635	112	2992	3804	2265	3020.33		6737	3798	14195	8243.33				26.7143	33.9643	20.2232			60.1518	33.9107	126.741					0.012495	0.00248168	0.00118771	0.00538813		7.59776e-05	3.58265e-05	8.4141e-05	6.5315e-05		82.4945
NM_009372	253	219	281	275	258.333		395	380	1184	653				0.865613	1.11067	1.08696			1.56126	1.50198	4.67984					0.00040487	8.11539e-05	6.38372e-05	0.000183287		1.97203e-06	1.58683e-06	3.10686e-06	2.22191e-06		82.4909
NM_152894	1026	149	144	87	126.667		211	385	544	380				0.145224	0.140351	0.0847953			0.205653	0.375244	0.530214					6.79252e-05	1.02551e-05	4.98005e-06	2.77201e-05		2.5976e-07	3.96443e-07	3.51999e-07	3.36067e-07		82.4838
NM_025436	274	2117	1703	1902	1907.33		2760	4201	10461	5807.33				7.72628	6.21533	6.94161			10.073	15.3321	38.1788					0.00361379	0.000454138	0.000407682	0.00149187		1.27232e-05	1.61983e-05	2.53462e-05	1.80892e-05		82.4728
NM_001081390	1094	53	259	186	166		74	328	336	246				0.0484461	0.236746	0.170018			0.0676417	0.299817	0.30713					2.26595e-05	1.72984e-05	9.98522e-06	1.66477e-05		8.54381e-08	3.16755e-07	2.03898e-07	2.0203e-07		82.4021
NM_018773	339	1204	1545	1114	1287.67		2653	2399	4691	3247.67				3.55162	4.55752	3.28614			7.82596	7.0767	13.8378					0.00166119	0.000333006	0.000192996	0.000729064		9.88496e-06	7.47649e-06	9.18662e-06	8.84936e-06		82.3861
NM_010719	783	135	101	113	116.333		205	232	652	363				0.172414	0.128991	0.144317			0.261814	0.296296	0.832695					8.06426e-05	9.42504e-06	8.47576e-06	3.28478e-05		3.30696e-07	3.13035e-07	5.5281e-07	3.98847e-07		82.3568
NM_139064	411	142	145	87	124.667		365	213	469	349				0.345499	0.352798	0.211679			0.888078	0.518248	1.14112					0.000161599	2.5778e-05	1.2432e-05	6.6603e-05		1.12173e-06	5.47526e-07	7.57567e-07	8.08941e-07		82.3336
NM_001198984	1337	490	498	343	443.667		1123	805	1810	1246				0.366492	0.372476	0.256545			0.83994	0.602094	1.35378					0.000171418	2.72158e-05	1.50669e-05	7.12337e-05		1.06093e-06	6.36109e-07	8.98747e-07	8.65261e-07		82.3262
NM_016805	781	4405	5359	3936	4566.67		6972	10918	18455	12115				5.6402	6.86172	5.03969			8.92702	13.9795	23.63					0.00263808	0.000501368	0.000295982	0.00114514		1.12757e-05	1.47693e-05	1.56875e-05	1.39108e-05		82.3202
NM_011297	111	2992	3803	2264	3019.67		6744	3804	14245	8264.33				26.955	34.2613	20.3964			60.7568	34.2703	128.333					0.0126076	0.00250338	0.00119789	0.00543627		7.67418e-05	3.62063e-05	8.51981e-05	6.60487e-05		82.307
NM_012002	305	636	705	612	651		962	1470	2880	1770.67				2.08525	2.31148	2.00656			3.1541	4.81967	9.44262					0.000975325	0.000168893	0.000117846	0.000420688		3.98394e-06	5.09195e-06	6.26878e-06	5.11489e-06		82.2478
NM_015790	303	106	143	130	126.333		149	253	554	318.667				0.349835	0.471947	0.429043			0.491749	0.834983	1.82838					0.000163627	3.44839e-05	2.51978e-05	7.44363e-05		6.21128e-07	8.82155e-07	1.21383e-06	9.05704e-07		82.1862
NM_009188	1079	589	846	738	724.333		1053	928	3506	1829				0.545876	0.784059	0.683967			0.975904	0.860056	3.2493					0.000255321	5.72892e-05	4.01695e-05	0.000117593		1.23266e-06	9.08644e-07	2.15715e-06	1.43282e-06		82.0712
NM_022408	461	102	112	107	107		234	127	495	285.333				0.221258	0.24295	0.232104			0.507592	0.275488	1.07375					0.000103488	1.77517e-05	1.36315e-05	4.49572e-05		6.41139e-07	2.91051e-07	7.12844e-07	5.48345e-07		81.9871
NM_194067	196	161	721	658	513.333		199	539	1826	854.667				0.821429	3.67857	3.35714			1.01531	2.75	9.31633					0.000384204	0.000268784	0.000197166	0.000283385		1.28243e-06	2.90536e-06	6.18493e-06	3.45757e-06		81.9605
NM_001170591	237	241	284	197	240.667		385	419	1269	691				1.01688	1.19831	0.831224			1.62447	1.76793	5.35443					0.000475621	8.75575e-05	4.8818e-05	0.000203999		2.05187e-06	1.86781e-06	3.5547e-06	2.49146e-06		81.8792
NM_020003	385	1065	1302	1215	1194		2425	1976	4476	2959				2.76623	3.38182	3.15584			6.2987	5.13247	11.626					0.00129384	0.000247101	0.000185344	0.000575429		7.95588e-06	5.42242e-06	7.71826e-06	7.03219e-06		81.8278
NM_026776	157	490	521	412	474.333		679	1021	2455	1385				3.12102	3.31847	2.6242			4.32484	6.50318	15.6369					0.00145978	0.000242472	0.00015412	0.000618792		5.4627e-06	6.87057e-06	1.03811e-05	7.57145e-06		81.7271
NM_178682	283	331	379	304	338		753	643	1238	878				1.16961	1.33922	1.0742			2.66078	2.27208	4.37456					0.000547059	9.78535e-05	6.30883e-05	0.000236		3.36082e-06	2.40044e-06	2.90419e-06	2.88848e-06		81.7038
NM_010821	701	19855	16143	9192	15063.3		49581	42146	41771	44499.3				28.3238	23.0285	13.1127			70.729	60.1227	59.5877					0.0132478	0.00168263	0.000770112	0.00523352		8.93376e-05	6.35192e-05	3.95592e-05	6.41387e-05		81.5969
NM_001253738	229	3957	5599	3014	4190		9043	6352	17684	11026.3				17.2795	24.4498	13.1616			39.4891	27.738	77.2227					0.00808207	0.00178648	0.000772982	0.00354718		4.98786e-05	2.9305e-05	5.12667e-05	4.34834e-05		81.5754
NM_001159513	352	538	646	425	536.333		1094	940	2402	1478.67				1.52841	1.83523	1.20739			3.10795	2.67045	6.82386					0.000714878	0.000134095	7.09101e-05	0.000306628		3.92565e-06	2.82132e-06	4.53023e-06	3.75907e-06		81.5702
NM_027977	396	235	371	301	302.333		427	601	1088	705.333				0.593434	0.936869	0.760101			1.07828	1.51768	2.74747					0.000277565	6.84545e-05	4.46409e-05	0.00013022		1.36198e-06	1.60342e-06	1.824e-06	1.59646e-06		81.5679
NM_011552	1301	485	495	337	439		1117	813	1805	1245				0.37279	0.380477	0.259032			0.85857	0.624904	1.38739					0.000174364	2.78004e-05	1.5213e-05	7.24591e-05		1.08446e-06	6.60207e-07	9.21065e-07	8.88577e-07		81.5451
NM_007999	361	518	634	699	617		772	1099	2875	1582				1.4349	1.75623	1.93629			2.1385	3.04432	7.96399					0.000671143	0.000128323	0.000113719	0.000304395		2.70114e-06	3.21631e-06	5.28714e-06	3.73486e-06		81.501
NM_026425	169	460	364	279	367.667		710	873	2032	1205				2.72189	2.15385	1.65089			4.20118	5.16568	12.0237					0.0012731	0.000157376	9.6957e-05	0.000509145		5.30651e-06	5.45751e-06	7.98229e-06	6.24877e-06		81.4793
NM_001136075	634	326	446	355	375.667		544	629	1771	981.333				0.514196	0.70347	0.559937			0.858044	0.992114	2.79338					0.000240503	5.14007e-05	3.28852e-05	0.000108263		1.08379e-06	1.04816e-06	1.85447e-06	1.32881e-06		81.4738
NM_139001	2308	547	556	602	568.333		1132	1107	2221	1486.67				0.237002	0.240901	0.260832			0.490468	0.479636	0.962305					0.000110852	1.7602e-05	1.53187e-05	4.79243e-05		6.19509e-07	5.06733e-07	6.38856e-07	5.88366e-07		81.4532
NM_019553	832	1151	1489	914	1184.67		1601	2919	5279	3266.33				1.38341	1.78966	1.09856			1.92428	3.50841	6.34495					0.00064706	0.000130766	6.45186e-05	0.000280781		2.43055e-06	3.70662e-06	4.21229e-06	3.44982e-06		81.3901
NM_007450	279	918	1150	774	947.333		1670	1646	4547	2621				3.29032	4.12186	2.77419			5.98566	5.89964	16.2975					0.00153897	0.000301174	0.000162929	0.000667692		7.56048e-06	6.23294e-06	1.08196e-05	8.20434e-06		81.3828
NM_010561	892	240	420	326	328.667		457	624	1138	739.667				0.269058	0.470852	0.365471			0.512332	0.699552	1.27578					0.000125846	3.44039e-05	2.14642e-05	6.05713e-05		6.47125e-07	7.39072e-07	8.46969e-07	7.44389e-07		81.3705
NM_026850	221	495	536	347	459.333		928	968	2084	1326.67				2.23982	2.42534	1.57014			4.1991	4.38009	9.42986					0.00104762	0.000177213	9.22145e-05	0.000439017		5.30387e-06	4.62754e-06	6.26031e-06	5.39724e-06		81.341
NM_028758	584	356	243	207	268.667		771	613	1197	860.333				0.609589	0.416096	0.354452			1.32021	1.04966	2.04966					0.000285121	3.0403e-05	2.08171e-05	0.000112114		1.66755e-06	1.10896e-06	1.36073e-06	1.37908e-06		81.2961
NM_026989	404	294	352	259	301.667		709	551	1082	780.667				0.727723	0.871287	0.641089			1.75495	1.36386	2.67822					0.000340375	6.36627e-05	3.76513e-05	0.00014723		2.21668e-06	1.44091e-06	1.77802e-06	1.81187e-06		81.2586
NM_007944	888	349	398	327	358		580	691	1720	997				0.393018	0.448198	0.368243			0.653153	0.778153	1.93694					0.000183825	3.27487e-05	2.1627e-05	7.94003e-05		8.24997e-07	8.22114e-07	1.2859e-06	9.77669e-07		81.2139
NM_010949	585	326	443	356	375		538	637	1779	984.667				0.557265	0.757265	0.608547			0.919658	1.08889	3.04103					0.000260648	5.53314e-05	3.57401e-05	0.00011724		1.16162e-06	1.1504e-06	2.01888e-06	1.44363e-06		81.2115
NM_153414	668	325	436	287	349.333		638	662	1456	918.667				0.486527	0.652695	0.429641			0.95509	0.991018	2.17964					0.000227562	4.76907e-05	2.52329e-05	0.000100162		1.20637e-06	1.047e-06	1.44702e-06	1.23347e-06		81.2035
NM_026758	142	100	127	77	101.333		241	158	415	271.333				0.704225	0.894366	0.542254			1.69718	1.11268	2.92254					0.000329385	6.5349e-05	3.18467e-05	0.000142194		2.14371e-06	1.17554e-06	1.94022e-06	1.75315e-06		81.1073
NM_138600	520	115	283	158	185.333		261	268	633	387.333				0.221154	0.544231	0.303846			0.501923	0.515385	1.21731					0.00010344	3.97655e-05	1.7845e-05	5.36834e-05		6.33978e-07	5.44501e-07	8.08147e-07	6.62209e-07		81.0671
NM_009149	1156	4512	4547	4462	4507		7184	9288	21814	12762				3.90311	3.93339	3.85986			6.21453	8.0346	18.8702					0.00182559	0.000287403	0.000226691	0.000779895		7.84957e-06	8.48851e-06	1.25276e-05	9.62189e-06		81.0542
NM_026438	270	165	261	160	195.333		261	380	862	501				0.611111	0.966667	0.592593			0.966667	1.40741	3.19259					0.000285833	7.06318e-05	3.48031e-05	0.000130423		1.221e-06	1.48692e-06	2.1195e-06	1.60914e-06		81.0513
NM_011701	447	19836	37253	19966	25685		30147	58781	93945	60957.7				44.3758	83.34	44.6667			67.443	131.501	210.168					0.0207558	0.00608944	0.00262328	0.00982283		8.51871e-05	0.00013893	0.000139526	0.000121215		81.0367
NM_028307	541	115	117	76	102.667		217	238	451	302				0.212569	0.216266	0.140481			0.401109	0.439926	0.833641					9.94244e-05	1.5802e-05	8.25046e-06	4.11589e-05		5.0664e-07	4.64779e-07	5.53439e-07	5.08286e-07		80.976
NM_007638	525	1660	2132	1660	1817.33		3076	3857	7166	4699.67				3.1619	4.06095	3.1619			5.85905	7.34667	13.6495					0.00147891	0.000296723	0.000185699	0.000653777		7.40055e-06	7.76171e-06	9.06166e-06	8.07464e-06		80.9667
NM_022314	265	3803	5339	2800	3980.67		8767	6113	17045	10641.7				14.3509	20.1472	10.566			33.083	23.0679	64.3208					0.00671232	0.0014721	0.000620546	0.00293499		4.17871e-05	2.43711e-05	4.27013e-05	3.62865e-05		80.8837
NM_026913	230	105	176	106	129		143	298	527	322.667				0.456522	0.765217	0.46087			0.621739	1.29565	2.2913					0.000213527	5.59124e-05	2.7067e-05	9.88356e-05		7.85318e-07	1.36885e-06	1.52115e-06	1.22511e-06		80.6751
NM_001204910	959	2347	4351	2479	3059		5014	5924	10198	7045.33				2.44734	4.53702	2.58498			5.22836	6.17727	10.634					0.00114469	0.000331508	0.000151817	0.000542671		6.60394e-06	6.52625e-06	7.05971e-06	6.72996e-06		80.635
NM_021288	288	203	367	475	348.333		281	447	1550	759.333				0.704861	1.27431	1.64931			0.975694	1.55208	5.38194					0.000329682	9.31102e-05	9.68641e-05	0.000173219		1.2324e-06	1.63977e-06	3.57297e-06	2.14838e-06		80.6277
NM_025842	202	376	614	433	474.333		743	580	2264	1195.67				1.86139	3.0396	2.14356			3.67822	2.87129	11.2079					0.00087062	0.000222096	0.000125892	0.000406203		4.64595e-06	3.0335e-06	7.44073e-06	5.04006e-06		80.5949
NM_001110205	490	215	237	197	216.333		458	506	747	570.333				0.438776	0.483673	0.402041			0.934694	1.03265	1.52449					0.000205227	3.53407e-05	2.3612e-05	8.80599e-05		1.18061e-06	1.09099e-06	1.01208e-06	1.09456e-06		80.4523
NM_001110204	490	215	237	197	216.333		458	506	747	570.333				0.438776	0.483673	0.402041			0.934694	1.03265	1.52449					0.000205227	3.53407e-05	2.3612e-05	8.80599e-05		1.18061e-06	1.09099e-06	1.01208e-06	1.09456e-06		80.4523
NM_007394	490	215	237	197	216.333		458	506	747	570.333				0.438776	0.483673	0.402041			0.934694	1.03265	1.52449					0.000205227	3.53407e-05	2.3612e-05	8.80599e-05		1.18061e-06	1.09099e-06	1.01208e-06	1.09456e-06		80.4523
NM_009183	340	240	352	347	313		436	583	1211	743.333				0.705882	1.03529	1.02059			1.28235	1.71471	3.56176					0.00033016	7.56462e-05	5.99394e-05	0.000155249		1.61974e-06	1.81158e-06	2.36459e-06	1.93197e-06		80.3578
NM_024431	304	2333	3044	2001	2459.33		3547	5829	10802	6726				7.67434	10.0132	6.58224			11.6678	19.1743	35.5329					0.0035895	0.000731635	0.000386576	0.00156924		1.47375e-05	2.02576e-05	2.35896e-05	1.95282e-05		80.3573
NM_026340	996	149	145	88	127.333		224	392	552	389.333				0.149598	0.145582	0.0883534			0.2249	0.393574	0.554217					6.99712e-05	1.06373e-05	5.18902e-06	2.85992e-05		2.8407e-07	4.15809e-07	3.67934e-07	3.55938e-07		80.3488
NM_011296	133	2798	3143	1974	2638.33		4366	3019	17903	8429.33				21.0376	23.6316	14.8421			32.8271	22.6992	134.609					0.00983985	0.0017267	0.000871681	0.00414608		4.14638e-05	2.39816e-05	8.93644e-05	5.16033e-05		80.3452
NM_001166630	94	665	1159	1010	944.667		1584	1176	3647	2135.67				7.07447	12.3298	10.7447			16.8511	12.5106	38.7979					0.00330892	0.000900905	0.000631038	0.00161362		2.12846e-05	1.32174e-05	2.57572e-05	2.00864e-05		80.3341
NM_001166627	94	665	1159	1010	944.667		1584	1176	3647	2135.67				7.07447	12.3298	10.7447			16.8511	12.5106	38.7979					0.00330892	0.000900905	0.000631038	0.00161362		2.12846e-05	1.32174e-05	2.57572e-05	2.00864e-05		80.3341
NM_009643	5637	35685	54959	34381	41675		50113	100163	171375	107217				6.33049	9.74969	6.09917			8.89001	17.7688	30.4018					0.00296094	0.000712384	0.000358206	0.00134384		1.1229e-05	1.87727e-05	2.01832e-05	1.67283e-05		80.3337
NM_001005523	170	143	110	62	105		300	191	599	363.333				0.841176	0.647059	0.364706			1.76471	1.12353	3.52353					0.000393441	4.72789e-05	2.14193e-05	0.000154046		2.229e-06	1.187e-06	2.3392e-06	1.9184e-06		80.2993
NM_001122896	497	768	1055	742	855		1217	1889	3681	2262.33				1.54527	2.12274	1.49296			2.44869	3.8008	7.40644					0.000722765	0.000155103	8.76818e-05	0.00032185		3.09294e-06	4.01553e-06	4.91699e-06	4.00849e-06		80.2921
NM_007631	276	3064	3389	2361	2938		5972	6357	12655	8328				11.1014	12.279	8.55435			21.6377	23.0326	45.8514					0.00519245	0.000897193	0.000502399	0.00219735		2.73305e-05	2.43338e-05	3.04399e-05	2.73681e-05		80.2886
NM_009320	602	4619	4627	3945	4397		8188	11315	17643	12382				7.67276	7.68605	6.55316			13.6013	18.7957	29.3073					0.00358875	0.000561599	0.000384869	0.00151174		1.71798e-05	1.98575e-05	1.94566e-05	1.88313e-05		80.2781
NM_001177406_dup2	466	131	140	144	138.333		373	243	404	340				0.281116	0.300429	0.309013			0.800429	0.521459	0.866953					0.000131485	2.19516e-05	1.81484e-05	5.71951e-05		1.01102e-06	5.50918e-07	5.75554e-07	7.12498e-07		80.2742
NM_001177407_dup2	466	131	140	144	138.333		373	243	404	340				0.281116	0.300429	0.309013			0.800429	0.521459	0.866953					0.000131485	2.19516e-05	1.81484e-05	5.71951e-05		1.01102e-06	5.50918e-07	5.75554e-07	7.12498e-07		80.2742
NM_027439	331	2402	2945	2155	2500.67		5096	5668	8781	6515				7.2568	8.89728	6.51057			15.3958	17.1239	26.5287					0.0033942	0.000650101	0.000382368	0.00147556		1.94464e-05	1.80913e-05	1.76119e-05	1.83832e-05		80.2666
NM_008683	62	261	503	307	357		611	396	1527	844.667				4.20968	8.1129	4.95161			9.85484	6.3871	24.629					0.00196898	0.000592788	0.000290809	0.000950859		1.24476e-05	6.74793e-06	1.63507e-05	1.18488e-05		80.2496
NM_026756	409	270	212	198	226.667		529	472	1122	707.667				0.660147	0.518337	0.484108			1.2934	1.15403	2.74328					0.000308768	3.78736e-05	2.84318e-05	0.000125025		1.63369e-06	1.21923e-06	1.82121e-06	1.55804e-06		80.2446
NM_008688	420	270	221	202	231		532	477	1126	711.667				0.642857	0.52619	0.480952			1.26667	1.13571	2.68095					0.000300682	3.84474e-05	2.82465e-05	0.000122458		1.59992e-06	1.19988e-06	1.77983e-06	1.52654e-06		80.2194
NM_133705	301	225	210	215	216.667		567	358	854	593				0.747508	0.697674	0.714286			1.88372	1.18937	2.83721					0.00034963	5.09772e-05	4.19502e-05	0.000147519		2.37932e-06	1.25656e-06	1.88357e-06	1.83982e-06		80.1813
NM_013810	414	472	592	417	493.667		798	1394	1686	1292.67				1.1401	1.42995	1.00725			1.92754	3.36715	4.07246					0.000533254	0.000104483	5.91558e-05	0.000232297		2.43467e-06	3.55737e-06	2.70363e-06	2.89856e-06		80.1424
NM_144897	263	272	389	336	332.333		594	522	1340	818.667				1.03422	1.47909	1.27757			2.25856	1.98479	5.09506					0.000483733	0.000108073	7.50318e-05	0.000222279		2.85278e-06	2.09692e-06	3.38251e-06	2.7774e-06		80.0313
NM_027030	319	164	181	168	171		247	380	805	477.333				0.514107	0.567398	0.526646			0.774295	1.19122	2.52351					0.000240461	4.14583e-05	3.093e-05	0.000104283		9.7801e-07	1.25852e-06	1.67531e-06	1.30395e-06		79.9751
NM_010752	698	234	305	224	254.333		456	475	1106	679				0.335244	0.436963	0.320917			0.653295	0.680516	1.58453					0.000156802	3.19277e-05	1.88475e-05	6.91926e-05		8.25176e-07	7.18961e-07	1.05194e-06	8.65358e-07		79.9583
NM_175335	320	213	339	230	260.667		473	465	958	632				0.665625	1.05937	0.71875			1.47812	1.45312	2.99375					0.000311331	7.74057e-05	4.22124e-05	0.00014365		1.86702e-06	1.53522e-06	1.98749e-06	1.79658e-06		79.9574
NM_139236	1133	539	495	444	492.667		882	1219	2306	1469				0.475728	0.436893	0.39188			0.778464	1.0759	2.0353					0.000222511	3.19226e-05	2.30152e-05	9.24829e-05		9.83277e-07	1.13669e-06	1.3512e-06	1.15705e-06		79.9296
NM_011568	236	823	853	622	766		2079	1108	3406	2197.67				3.48729	3.61441	2.63559			8.80932	4.69492	14.4322					0.0016311	0.000264095	0.000154789	0.000683328		1.1127e-05	4.96015e-06	9.58127e-06	8.55615e-06		79.8639
NM_001042489	250	180	96	55	110.333		475	293	412	393.333				0.72	0.384	0.22			1.9	1.172	1.648					0.000336763	2.80579e-05	1.29207e-05	0.000125914		2.39989e-06	1.23821e-06	1.09408e-06	1.57739e-06		79.8242
NM_028752	250	180	96	55	110.333		475	293	412	393.333				0.72	0.384	0.22			1.9	1.172	1.648					0.000336763	2.80579e-05	1.29207e-05	0.000125914		2.39989e-06	1.23821e-06	1.09408e-06	1.57739e-06		79.8242
NM_008692	316	136	217	168	173.667		237	367	652	418.667				0.43038	0.686709	0.531646			0.75	1.16139	2.06329					0.0002013	5.0176e-05	3.12237e-05	9.42333e-05		9.47324e-07	1.227e-06	1.36978e-06	1.18137e-06		79.7662
NM_001048168	316	136	217	168	173.667		237	367	652	418.667				0.43038	0.686709	0.531646			0.75	1.16139	2.06329					0.0002013	5.0176e-05	3.12237e-05	9.42333e-05		9.47324e-07	1.227e-06	1.36978e-06	1.18137e-06		79.7662
NM_025334	151	218	330	274	274		436	515	1036	662.333				1.44371	2.18543	1.81457			2.88742	3.4106	6.86093					0.000675261	0.000159684	0.00010657	0.000313838		3.64709e-06	3.60327e-06	4.55484e-06	3.93507e-06		79.7542
NM_181318	453	1043	693	517	751		1764	2192	3902	2619.33				2.30243	1.5298	1.14128			3.89404	4.83885	8.61369					0.00107691	0.000111779	6.70277e-05	0.000418571		4.91856e-06	5.11222e-06	5.71846e-06	5.24975e-06		79.7317
NM_027457	121	138	142	114	131.333		227	271	680	392.667				1.1405	1.17355	0.942149			1.87603	2.23967	5.61983					0.000533441	8.57485e-05	5.53326e-05	0.000224841		2.36961e-06	2.3662e-06	3.7309e-06	2.82224e-06		79.6675
NM_177083	270	339	611	237	395.667		482	1147	1365	998				1.25556	2.26296	0.877778			1.78519	4.24815	5.05556					0.000587257	0.000165349	5.15521e-05	0.000268053		2.25486e-06	4.48814e-06	3.35629e-06	3.36643e-06		79.6252
NM_011317	424	984	1449	928	1120.33		2130	2208	4181	2839.67				2.32075	3.41745	2.18868			5.02358	5.20755	9.86085					0.00108548	0.000249704	0.000128542	0.000487908		6.34528e-06	5.50174e-06	6.54643e-06	6.13115e-06		79.5786
NM_153489	1048	1058	1786	1250	1364.67		2459	2135	5155	3249.67				1.00954	1.7042	1.19275			2.34637	2.03721	4.91889					0.00047219	0.000124521	7.00504e-05	0.000222254		2.9637e-06	2.1523e-06	3.26556e-06	2.79385e-06		79.551
NM_008681	375	84	147	76	102.333		154	249	344	249				0.224	0.392	0.202667			0.410667	0.664	0.917333					0.000104771	2.86424e-05	1.19027e-05	4.84386e-05		5.18712e-07	7.01512e-07	6.09e-07	6.09742e-07		79.4413
NM_001166368	121	147	339	266	250.667		431	182	960	524.333				1.21488	2.80165	2.19835			3.56198	1.50413	7.93388					0.00056823	0.000204709	0.000129109	0.000300683		4.49914e-06	1.58911e-06	5.26716e-06	3.78513e-06		79.4379
NM_008020	121	147	339	266	250.667		431	182	960	524.333				1.21488	2.80165	2.19835			3.56198	1.50413	7.93388					0.00056823	0.000204709	0.000129109	0.000300683		4.49914e-06	1.58911e-06	5.26716e-06	3.78513e-06		79.4379
NM_010368	629	4124	5798	3950	4624		6637	10784	19225	12215.3				6.55644	9.21781	6.27981			10.5517	17.1447	30.5644					0.00306662	0.000673521	0.000368815	0.00136965		1.33278e-05	1.81132e-05	2.02911e-05	1.72441e-05		79.4275
NM_009227	73	515	519	383	472.333		1035	1062	2055	1384				7.05479	7.10959	5.24658			14.1781	14.5479	28.1507					0.00329972	0.000519479	0.000308133	0.00137578		1.79083e-05	1.53698e-05	1.86887e-05	1.73223e-05		79.4224
NM_144541	364	322	381	373	358.667		519	653	1774	982				0.884615	1.0467	1.02473			1.42582	1.79396	4.87363					0.000413758	7.64799e-05	6.01824e-05	0.000183474		1.80096e-06	1.8953e-06	3.23551e-06	2.31059e-06		79.4055
NM_001163608	488	165	317	348	276.667		266	384	1174	608				0.338115	0.64959	0.713115			0.545082	0.786885	2.40574					0.000158145	4.74638e-05	4.18814e-05	8.24969e-05		6.88492e-07	8.31339e-07	1.59712e-06	1.03899e-06		79.4014
NM_001130477	899	604	657	484	581.667		1260	928	2936	1708				0.671858	0.730812	0.538376			1.40156	1.03226	3.26585					0.000314246	5.33985e-05	3.1619e-05	0.000133088		1.7703e-06	1.09057e-06	2.16814e-06	1.67634e-06		79.3919
NM_019773	182	172	153	116	147		180	362	950	497.333				0.945055	0.840659	0.637363			0.989011	1.98901	5.21978					0.000442028	6.14248e-05	3.74325e-05	0.000180295		1.24922e-06	2.10138e-06	3.46531e-06	2.27197e-06		79.3562
NM_025701	169	87	109	108	101.333		176	160	455	263.667				0.514793	0.64497	0.639053			1.04142	0.946746	2.69231					0.000240782	4.71263e-05	3.75318e-05	0.00010848		1.31542e-06	1.00023e-06	1.78737e-06	1.36767e-06		79.3173
NM_025968	310	314	635	356	435		447	890	1801	1046				1.0129	2.04839	1.14839			1.44194	2.87097	5.80968					0.000473762	0.00014967	6.74451e-05	0.000230292		1.82131e-06	3.03316e-06	3.85693e-06	2.9038e-06		79.3073
NM_145839	454	1044	693	519	752		1765	2208	3951	2641.33				2.29956	1.52643	1.14317			3.88767	4.86344	8.70264					0.00107557	0.000111532	6.71388e-05	0.000418079		4.9105e-06	5.13819e-06	5.77752e-06	5.2754e-06		79.2506
NM_013495	754	667	1020	752	813		920	1834	3519	2091				0.884615	1.35279	0.997347			1.22016	2.43236	4.66711					0.000413758	9.88445e-05	5.85745e-05	0.000190392		1.54118e-06	2.56977e-06	3.0984e-06	2.40312e-06		79.2272
NM_017406	680	377	373	383	377.667		885	713	1482	1026.67				0.554412	0.548529	0.563235			1.30147	1.04853	2.17941					0.000259313	4.00796e-05	3.3079e-05	0.000110824		1.64389e-06	1.10776e-06	1.44687e-06	1.39951e-06		79.1879
NM_001161853	357	460	572	383	471.667		630	1154	2283	1355.67				1.28852	1.60224	1.07283			1.76471	3.23249	6.39496					0.000602673	0.000117072	6.30075e-05	0.000260917		2.229e-06	3.41511e-06	4.24549e-06	3.29653e-06		79.1491
NM_021895	893	2083	2696	1990	2256.33		4422	5067	8061	5850				2.33259	3.01904	2.22844			4.95185	5.67413	9.02688					0.00109101	0.000220593	0.000130877	0.000480828		6.25467e-06	5.99469e-06	5.99277e-06	6.08071e-06		79.0743
NM_207523	137	2303	2677	1663	2214.33		5830	3341	9705	6292				16.8102	19.5401	12.1387			42.5547	24.3869	70.8394					0.00786259	0.00142775	0.000712908	0.00333442		5.37508e-05	2.57646e-05	4.70289e-05	4.21814e-05		79.0493
NM_001039147	343	2273	2976	1980	2409.67		3483	5816	10739	6679.33				6.62682	8.67638	5.77259			10.1545	16.9563	31.309					0.00309954	0.000633961	0.000339026	0.00135751		1.28262e-05	1.79142e-05	2.07855e-05	1.71753e-05		79.0386
NM_013854	818	514	755	521	596.667		908	1236	2522	1555.33				0.628362	0.922983	0.636919			1.11002	1.511	3.08313					0.000293902	6.74399e-05	3.74064e-05	0.000132916		1.40207e-06	1.59636e-06	2.04683e-06	1.68176e-06		79.0341
NM_027213	176	202	165	138	168.333		433	297	889	539.667				1.14773	0.9375	0.784091			2.46023	1.6875	5.05114					0.000536823	6.85007e-05	4.60499e-05	0.000217124		3.10751e-06	1.78283e-06	3.35335e-06	2.7479e-06		79.0147
NM_198303	1197	1022	1290	726	1012.67		1682	2874	3949	2835				0.853801	1.07769	0.606516			1.40518	2.401	3.29908					0.000399346	7.87443e-05	3.56209e-05	0.000171237		1.77488e-06	2.53664e-06	2.1902e-06	2.16724e-06		79.0115
NM_026556	70	152	258	147	185.667		558	223	463	414.667				2.17143	3.68571	2.1			7.97143	3.18571	6.61429					0.00101564	0.000269305	0.000123334	0.000469425		1.00687e-05	3.36569e-06	4.3911e-06	5.94183e-06		79.0034
NM_001168472	70	152	258	147	185.667		558	223	463	414.667				2.17143	3.68571	2.1			7.97143	3.18571	6.61429					0.00101564	0.000269305	0.000123334	0.000469425		1.00687e-05	3.36569e-06	4.3911e-06	5.94183e-06		79.0034
NM_001168471	70	152	258	147	185.667		558	223	463	414.667				2.17143	3.68571	2.1			7.97143	3.18571	6.61429					0.00101564	0.000269305	0.000123334	0.000469425		1.00687e-05	3.36569e-06	4.3911e-06	5.94183e-06		79.0034
NM_194066	231	170	794	703	555.667		232	534	2119	961.667				0.735931	3.43723	3.04329			1.00433	2.31169	9.17316					0.000344215	0.000251149	0.000178733	0.000258032		1.26857e-06	2.44228e-06	6.08989e-06	3.26691e-06		78.9835
NM_024124	569	168	173	114	151.667		306	233	916	485				0.295255	0.304042	0.200351			0.537786	0.40949	1.60984					0.000138099	2.22156e-05	1.17667e-05	5.73603e-05		6.79276e-07	4.32624e-07	1.06874e-06	7.26881e-07		78.9129
NM_016677	174	398	708	346	484		710	798	2308	1272				2.28736	4.06897	1.98851			4.08046	4.58621	13.2644					0.00106986	0.000297309	0.000116785	0.000494651		5.15402e-06	4.8453e-06	8.80596e-06	6.26843e-06		78.9114
NM_025624	122	547	1270	844	887		826	1594	3495	1971.67				4.48361	10.4098	6.91803			6.77049	13.0656	28.6475					0.0020971	0.000760619	0.000406298	0.00108801		8.5518e-06	1.38037e-05	1.90186e-05	1.37914e-05		78.8905
NM_026487	342	759	761	499	673		1199	1764	3313	2092				2.2193	2.22515	1.45906			3.50585	5.15789	9.68713					0.00103803	0.000162586	8.56912e-05	0.000428767		4.42823e-06	5.44928e-06	6.4311e-06	5.43621e-06		78.8725
NM_011854	489	1071	986	558	871.667		2314	2303	3501	2706				2.19018	2.01636	1.1411			4.73211	4.70961	7.15951					0.00102441	0.00014733	6.70173e-05	0.000412918		5.97712e-06	4.97568e-06	4.75306e-06	5.23528e-06		78.8722
NM_001161730	677	917	704	549	723.333		2222	1621	2990	2277.67				1.35451	1.03988	0.810931			3.28213	2.39439	4.41654					0.000633538	7.59814e-05	4.76262e-05	0.000252382		4.14565e-06	2.52966e-06	2.93206e-06	3.20245e-06		78.8089
NM_024173	99	621	883	642	715.333		2169	1016	1763	1649.33				6.27273	8.91919	6.48485			21.9091	10.2626	17.8081					0.00293392	0.000651702	0.000380857	0.00132216		2.76733e-05	1.08424e-05	1.18224e-05	1.67794e-05		78.7967
NM_170758	299	509	920	580	669.667		682	1596	2651	1643				1.70234	3.07692	1.9398			2.28094	5.33779	8.86622					0.000796231	0.000224823	0.000113925	0.000378326		2.88105e-06	5.63935e-06	5.88612e-06	4.80217e-06		78.7823
NM_011710	462	477	501	340	439.333		690	1219	2095	1334.67				1.03247	1.08442	0.735931			1.49351	2.63853	4.53463					0.000482913	7.92354e-05	4.32214e-05	0.00020179		1.88645e-06	2.78759e-06	3.01046e-06	2.5615e-06		78.7781
NM_080560	133	554	888	662	701.333		1264	1293	2480	1679				4.16541	6.67669	4.97744			9.50376	9.7218	18.6466					0.00194828	0.000487848	0.000292327	0.000909484		1.20042e-05	1.0271e-05	1.23791e-05	1.15514e-05		78.7333
NM_008776	213	110	140	113	121		246	210	506	320.667				0.516432	0.657277	0.530516			1.15493	0.985915	2.37559					0.000241549	4.80255e-05	3.11574e-05	0.000106911		1.45879e-06	1.04161e-06	1.57711e-06	1.35917e-06		78.6588
NM_133796	185	3348	5894	3641	4294.33		7819	6811	16661	10430.3				18.0973	31.8595	19.6811			42.2649	36.8162	90.0595					0.00846459	0.00232789	0.00115587	0.00398278		5.33847e-05	3.88961e-05	5.97888e-05	5.06899e-05		78.5716
NM_013671	203	527	601	317	481.667		1107	936	2330	1457.67				2.59606	2.96059	1.56158			5.4532	4.61084	11.4778					0.00121425	0.000216323	9.17118e-05	0.000507427		6.88793e-06	4.87132e-06	7.61992e-06	6.45972e-06		78.5524
NM_175677	478	279	529	324	377.333		572	848	1171	863.667				0.583682	1.10669	0.677824			1.19665	1.77406	2.44979					0.000273004	8.08633e-05	3.98088e-05	0.000131225		1.51149e-06	1.87428e-06	1.62637e-06	1.67071e-06		78.5444
NM_001146007	478	279	529	324	377.333		572	848	1171	863.667				0.583682	1.10669	0.677824			1.19665	1.77406	2.44979					0.000273004	8.08633e-05	3.98088e-05	0.000131225		1.51149e-06	1.87428e-06	1.62637e-06	1.67071e-06		78.5444
NM_001164075	286	219	290	280	263		422	422	1213	685.667				0.765734	1.01399	0.979021			1.47552	1.47552	4.24126					0.000358154	7.40893e-05	5.74981e-05	0.000163247		1.86373e-06	1.55888e-06	2.81569e-06	2.07944e-06		78.5056
NM_023644	698	100	139	73	104		175	260	429	288				0.143266	0.19914	0.104585			0.250716	0.372493	0.614613					6.70096e-05	1.45507e-05	6.14228e-06	2.92342e-05		3.16679e-07	3.93536e-07	4.0803e-07	3.72749e-07		78.4287
NM_008565	843	964	1210	1179	1117.67		1591	2279	5035	2968.33				1.14353	1.43535	1.39858			1.88731	2.70344	5.97272					0.000534862	0.000104877	8.21388e-05	0.000240626		2.38385e-06	2.85617e-06	3.96517e-06	3.0684e-06		78.4207
NM_001146308	417	457	591	413	487		792	1394	1677	1287.67				1.09592	1.41727	0.990408			1.89928	3.34293	4.02158					0.000512593	0.000103556	5.81669e-05	0.000224772		2.39898e-06	3.53178e-06	2.66985e-06	2.86687e-06		78.4032
NM_016972	512	3521	4939	3530	3996.67		8201	9292	12167	9886.67				6.87695	9.64648	6.89453			16.0176	18.1484	23.7637					0.00321654	0.000704843	0.000404918	0.0014421		2.02318e-05	1.91737e-05	1.57763e-05	1.83939e-05		78.4009
NM_001081304	637	725	903	635	754.333		1021	1596	4018	2211.67				1.13815	1.41758	0.99686			1.60283	2.50549	6.30769					0.000532342	0.000103579	5.85459e-05	0.000231489		2.02453e-06	2.64704e-06	4.18756e-06	2.95304e-06		78.39
NM_001164488	456	477	501	340	439.333		698	1225	2101	1341.33				1.04605	1.09868	0.745614			1.5307	2.6864	4.60746					0.000489267	8.0278e-05	4.37901e-05	0.000204445		1.93343e-06	2.83817e-06	3.0588e-06	2.61013e-06		78.3274
NM_001164314	456	477	501	340	439.333		698	1225	2101	1341.33				1.04605	1.09868	0.745614			1.5307	2.6864	4.60746					0.000489267	8.0278e-05	4.37901e-05	0.000204445		1.93343e-06	2.83817e-06	3.0588e-06	2.61013e-06		78.3274
NM_009657	344	297	210	157	221.333		746	465	985	732				0.863372	0.610465	0.456395			2.1686	1.35174	2.86337					0.000403822	4.46051e-05	2.68042e-05	0.000158411		2.73916e-06	1.42811e-06	1.90094e-06	2.02274e-06		78.315
NM_145929	616	332	474	342	382.667		662	876	1387	975				0.538961	0.769481	0.555195			1.07468	1.42208	2.25162					0.000252087	5.62239e-05	3.26067e-05	0.000113639		1.35742e-06	1.50242e-06	1.49481e-06	1.45155e-06		78.2881
NM_023538	402	132	176	155	154.333		242	315	650	402.333				0.328358	0.437811	0.385572			0.60199	0.783582	1.61692					0.000153582	3.19897e-05	2.26447e-05	6.94055e-05		7.60373e-07	8.2785e-07	1.07344e-06	8.87221e-07		78.228
NM_025569	134	301	545	426	424		456	757	1888	1033.67				2.24627	4.06716	3.1791			3.40299	5.64925	14.0896					0.00105064	0.000297177	0.00018671	0.000511509		4.2983e-06	5.9684e-06	9.35379e-06	6.54016e-06		78.2104
NM_011187	258	1000	1697	1273	1323.33		2080	2352	5137	3189.67				3.87597	6.57752	4.93411			8.06202	9.11628	19.9109					0.00181289	0.000480602	0.000289781	0.000861093		1.01831e-05	9.63129e-06	1.32184e-05	1.10109e-05		78.2033
NM_144559	230	251	316	93	220		652	641	551	614.667				1.0913	1.37391	0.404348			2.83478	2.78696	2.39565					0.000510432	0.000100388	2.37474e-05	0.000211523		3.58061e-06	2.9444e-06	1.59043e-06	2.70515e-06		78.1927
NM_080635	333	1008	1605	993	1202		1393	2756	5430	3193				3.02703	4.81982	2.98198			4.18318	8.27628	16.3063					0.00141582	0.000352172	0.000175133	0.000647709		5.28377e-06	8.74384e-06	1.08254e-05	8.28435e-06		78.1846
NM_001177407_dup1	466	126	143	146	138.333		373	244	404	340.333				0.270386	0.306867	0.313305			0.800429	0.523605	0.866953					0.000126467	2.2422e-05	1.84005e-05	5.57631e-05		1.01102e-06	5.53186e-07	5.75554e-07	7.13253e-07		78.1814
NM_001177406_dup1	466	126	143	146	138.333		373	244	404	340.333				0.270386	0.306867	0.313305			0.800429	0.523605	0.866953					0.000126467	2.2422e-05	1.84005e-05	5.57631e-05		1.01102e-06	5.53186e-07	5.75554e-07	7.13253e-07		78.1814
NM_013725	139	2252	3706	2161	2706.33		3733	4024	14452	7403				16.2014	26.6619	15.5468			26.8561	28.9496	103.971					0.00757785	0.00194811	0.000913065	0.00347968		3.39219e-05	3.05851e-05	6.90245e-05	4.45105e-05		78.1765
NM_001253708	322	1197	1505	1297	1333		2221	2893	5556	3556.67				3.71739	4.67391	4.02795			6.89752	8.98447	17.2547					0.00173872	0.000341511	0.000236563	0.000772266		8.71224e-06	9.49204e-06	1.1455e-05	9.88644e-06		78.1136
NM_177343	366	246	245	151	214		520	556	861	645.667				0.672131	0.669399	0.412568			1.42077	1.51913	2.35246					0.000314374	4.89112e-05	2.42302e-05	0.000129172		1.79457e-06	1.60495e-06	1.56175e-06	1.65376e-06		78.1081
NM_008891	707	274	328	255	285.667		696	523	1067	762				0.387553	0.463932	0.360679			0.984441	0.739745	1.50919					0.000181269	3.38983e-05	2.11828e-05	7.87833e-05		1.24345e-06	7.81537e-07	1.00193e-06	1.00897e-06		78.083
NM_009984	315	23347	32684	35778	30603		37936	49106	146983	78008.3				74.1175	103.759	113.581			120.432	155.892	466.613					0.0346667	0.00758138	0.00667064	0.0163062		0.000152117	0.000164699	0.000309775	0.000208864		78.0712
NM_001146309	413	462	596	416	491.333		811	1411	1696	1306				1.11864	1.4431	1.00726			1.96368	3.41646	4.10654					0.00052322	0.000105443	5.91569e-05	0.000229273		2.48032e-06	3.60947e-06	2.72625e-06	2.93868e-06		78.0191
NM_011094	661	1315	1086	533	978		2603	3397	3661	3220.33				1.98941	1.64297	0.806354			3.93797	5.13918	5.53858					0.0009305	0.000120047	4.73574e-05	0.000365968		4.97405e-06	5.42952e-06	3.67696e-06	4.69351e-06		77.9733
NM_011091	661	1315	1086	533	978		2603	3397	3661	3220.33				1.98941	1.64297	0.806354			3.93797	5.13918	5.53858					0.0009305	0.000120047	4.73574e-05	0.000365968		4.97405e-06	5.42952e-06	3.67696e-06	4.69351e-06		77.9733
NM_009008	173	852	1184	707	914.333		1391	2218	3998	2535.67				4.92486	6.84393	4.08671			8.04046	12.8208	23.1098					0.00230349	0.000500068	0.000240013	0.00101452		1.01559e-05	1.35451e-05	1.53422e-05	1.30144e-05		77.9539
NM_008823	445	7267	7326	4891	6494.67		17164	15236	24738	19046				16.3303	16.4629	10.991			38.5708	34.2382	55.591					0.00763814	0.0012029	0.000645505	0.00316218		4.87187e-05	3.61725e-05	3.69058e-05	4.0599e-05		77.8882
NM_025922	179	259	281	263	267.667		400	635	1269	768				1.44693	1.56983	1.46927			2.23464	3.54749	7.08939					0.000676767	0.000114704	8.62908e-05	0.000292587		2.82257e-06	3.7479e-06	4.70651e-06	3.75899e-06		77.8366
NM_001177706	373	130	211	153	164.667		288	231	735	418				0.348525	0.565684	0.410188			0.772118	0.619303	1.97051					0.000163015	4.1333e-05	2.40904e-05	7.61461e-05		9.75261e-07	6.5429e-07	1.30818e-06	9.79245e-07		77.76
NM_001177709	373	130	211	153	164.667		288	231	735	418				0.348525	0.565684	0.410188			0.772118	0.619303	1.97051					0.000163015	4.1333e-05	2.40904e-05	7.61461e-05		9.75261e-07	6.5429e-07	1.30818e-06	9.79245e-07		77.76
NM_026662	299	325	341	291	319		699	647	1399	915				1.08696	1.14047	0.973244			2.33779	2.16388	4.67893					0.000508399	8.3331e-05	5.71589e-05	0.000216296		2.95286e-06	2.28613e-06	3.10625e-06	2.78175e-06		77.7555
NM_001166627_dup1	94	665	1159	1010	944.667		1660	1206	3738	2201.33				7.07447	12.3298	10.7447			17.6596	12.8298	39.766					0.00330892	0.000900905	0.000631038	0.00161362		2.23058e-05	1.35546e-05	2.63999e-05	2.07534e-05		77.7521
NM_009342	94	665	1159	1010	944.667		1660	1206	3738	2201.33				7.07447	12.3298	10.7447			17.6596	12.8298	39.766					0.00330892	0.000900905	0.000631038	0.00161362		2.23058e-05	1.35546e-05	2.63999e-05	2.07534e-05		77.7521
NM_001166630_dup1	94	665	1159	1010	944.667		1660	1206	3738	2201.33				7.07447	12.3298	10.7447			17.6596	12.8298	39.766					0.00330892	0.000900905	0.000631038	0.00161362		2.23058e-05	1.35546e-05	2.63999e-05	2.07534e-05		77.7521
NM_001253714	191	62	193	163	139.333		132	192	464	262.667				0.324607	1.01047	0.853403			0.691099	1.00524	2.42932					0.000151828	7.38325e-05	5.01206e-05	9.19269e-05		8.72927e-07	1.06203e-06	1.61278e-06	1.18258e-06		77.7344
NM_001025599	526	179	162	144	161.667		314	412	763	496.333				0.340304	0.307985	0.273764			0.596958	0.78327	1.45057					0.000159169	2.25036e-05	1.60782e-05	6.59171e-05		7.54017e-07	8.2752e-07	9.63006e-07	8.48181e-07		77.7158
NM_057172	623	420	846	617	627.667		631	1425	2241	1432.33				0.674157	1.35795	0.990369			1.01284	2.28732	3.59711					0.000315321	9.92215e-05	5.81646e-05	0.000157569		1.27932e-06	2.41654e-06	2.38805e-06	2.02797e-06		77.698
NM_029291	730	329	436	312	359		565	729	1723	1005.67				0.450685	0.59726	0.427397			0.773973	0.99863	2.36027					0.000210797	4.36402e-05	2.51011e-05	9.31796e-05		9.77604e-07	1.05505e-06	1.56694e-06	1.19986e-06		77.6585
NM_001177707	375	130	213	153	165.333		288	231	740	419.667				0.346667	0.568	0.408			0.768	0.616	1.97333					0.000162145	4.15023e-05	2.39619e-05	7.58698e-05		9.7006e-07	6.508e-07	1.31006e-06	9.76973e-07		77.6581
NM_001177708	375	130	213	153	165.333		288	231	740	419.667				0.346667	0.568	0.408			0.768	0.616	1.97333					0.000162145	4.15023e-05	2.39619e-05	7.58698e-05		9.7006e-07	6.508e-07	1.31006e-06	9.76973e-07		77.6581
NM_009532	612	113	128	96	112.333		220	180	611	337				0.184641	0.20915	0.156863			0.359477	0.294118	0.998366					8.63613e-05	1.52821e-05	9.21259e-06	3.6952e-05		4.54055e-07	3.10733e-07	6.62796e-07	4.75862e-07		77.6528
NM_001081090	826	266	293	187	248.667		531	646	1004	727				0.322034	0.354722	0.226392			0.642857	0.782082	1.2155					0.000150624	2.59186e-05	1.32961e-05	6.32795e-05		8.11992e-07	8.26265e-07	8.06945e-07	8.15067e-07		77.6372
NM_001190357	308	154	221	169	181.333		234	276	1019	509.667				0.5	0.717532	0.548701			0.75974	0.896104	3.30844					0.000233863	5.24282e-05	3.22254e-05	0.000106172		9.59627e-07	9.46728e-07	2.19641e-06	1.36759e-06		77.6347
NM_009667	747	465	368	226	353		958	971	1633	1187.33				0.62249	0.492637	0.302544			1.28246	1.29987	2.18608					0.000291155	3.59957e-05	1.77685e-05	0.000114973		1.61988e-06	1.3733e-06	1.4513e-06	1.48149e-06		77.6064
NM_145512	140	129	164	122	138.333		148	369	674	397				0.921429	1.17143	0.871429			1.05714	2.63571	4.81429					0.000430977	8.55932e-05	5.11792e-05	0.00018925		1.33528e-06	2.78462e-06	3.19611e-06	2.43867e-06		77.6037
NM_203507	169	148	121	79	116		224	278	737	413				0.87574	0.715976	0.467456			1.32544	1.64497	4.36095					0.000409607	5.23145e-05	2.74538e-05	0.000163125		1.67417e-06	1.7379e-06	2.89515e-06	2.10241e-06		77.5897
NM_019948	195	668	473	291	477.333		1750	1562	1256	1522.67				3.42564	2.42564	1.49231			8.97436	8.01026	6.44103					0.00160226	0.000177235	8.76436e-05	0.000622381		1.13355e-05	8.46279e-06	4.27607e-06	8.02479e-06		77.5573
NM_013796	498	374	411	319	368		785	828	1534	1049				0.751004	0.825301	0.640562			1.57631	1.66265	3.08032					0.000351265	6.03026e-05	3.76204e-05	0.000149729		1.99103e-06	1.75658e-06	2.04497e-06	1.93086e-06		77.5454
NM_023230	128	564	631	403	532.667		973	873	3240	1695.33				4.40625	4.92969	3.14844			7.60156	6.82031	25.3125					0.00206092	0.000360199	0.000184909	0.000868676		9.60152e-06	7.20562e-06	1.68045e-05	1.12039e-05		77.5336
NM_001206382	314	161	215	191	189		448	303	652	467.667				0.512739	0.684713	0.60828			1.42675	0.964968	2.07643					0.000239822	5.00302e-05	3.57245e-05	0.000108525		1.80213e-06	1.01948e-06	1.3785e-06	1.40004e-06		77.5161
NM_001206383	314	161	215	191	189		448	303	652	467.667				0.512739	0.684713	0.60828			1.42675	0.964968	2.07643					0.000239822	5.00302e-05	3.57245e-05	0.000108525		1.80213e-06	1.01948e-06	1.3785e-06	1.40004e-06		77.5161
NM_001101598	187	164	210	159	177.667		293	431	727	483.667				0.877005	1.12299	0.850267			1.56684	2.30481	3.8877					0.000410199	8.20543e-05	4.99364e-05	0.00018073		1.97908e-06	2.43502e-06	2.58097e-06	2.33169e-06		77.5102
NM_019795	475	903	877	615	798.333		1430	2130	4046	2535.33				1.90105	1.84632	1.29474			3.01053	4.48421	8.51789					0.000889173	0.000134905	7.60402e-05	0.000366706		3.80259e-06	4.73754e-06	5.65487e-06	4.73167e-06		77.5005
NM_011338	103	3953	10084	4286	6107.67		7801	11128	22607	13845.3				38.3786	97.9029	41.6117			75.7379	108.039	219.485					0.0179507	0.00715351	0.00244386	0.0091827		9.56644e-05	0.000114142	0.000145712	0.000118506		77.487
NM_025928	183	151	275	277	234.333		273	320	1052	548.333				0.825137	1.50273	1.51366			1.4918	1.74863	5.74863					0.000385939	0.000109801	8.88977e-05	0.000194879		1.88429e-06	1.84742e-06	3.81641e-06	2.51604e-06		77.4546
NM_025356	128	935	1245	717	965.667		1489	2448	4377	2771.33				7.30469	9.72656	5.60156			11.6328	19.125	34.1953					0.0034166	0.000710694	0.000328981	0.00148542		1.46934e-05	2.02054e-05	2.27016e-05	1.92002e-05		77.3653
NM_028779	779	256	282	194	244		545	660	870	691.667				0.328626	0.362003	0.249037			0.699615	0.84724	1.11682					0.000153707	2.64506e-05	1.4626e-05	6.4928e-05		8.83682e-07	8.95104e-07	7.41433e-07	8.40073e-07		77.2885
NM_019422	260	814	999	575	796		1834	1660	3370	2288				3.13077	3.84231	2.21154			7.05385	6.38462	12.9615					0.00146434	0.000280747	0.000129884	0.000624992		8.9097e-06	6.74531e-06	8.60492e-06	8.08664e-06		77.287
NM_001039176	260	814	999	575	796		1834	1660	3370	2288				3.13077	3.84231	2.21154			7.05385	6.38462	12.9615					0.00146434	0.000280747	0.000129884	0.000624992		8.9097e-06	6.74531e-06	8.60492e-06	8.08664e-06		77.287
NM_009974	331	241	266	197	234.667		527	607	833	655.667				0.728097	0.803625	0.595166			1.59215	1.83384	2.51662					0.00034055	5.87188e-05	3.49543e-05	0.000144741		2.01104e-06	1.93744e-06	1.67073e-06	1.87307e-06		77.2749
NM_025344	342	1113	1334	887	1111.33		1939	2363	5617	3306.33				3.25439	3.90058	2.59357			5.66959	6.90936	16.424					0.00152216	0.000285005	0.000152321	0.000653163		7.16125e-06	7.29969e-06	1.09036e-05	8.45484e-06		77.2532
NM_026119	251	123	145	147	138.333		206	287	648	380.333				0.49004	0.577689	0.585657			0.820717	1.14343	2.58167					0.000229205	4.22102e-05	3.43958e-05	0.000101937		1.03665e-06	1.20802e-06	1.71392e-06	1.31953e-06		77.2524
NM_009190	425	903	1225	767	965		1777	2019	4265	2687				2.12471	2.88235	1.80471			4.18118	4.75059	10.0353					0.000993782	0.000210606	0.000105991	0.000436793		5.28124e-06	5.01897e-06	6.66224e-06	5.65415e-06		77.2518
NM_022992	169	659	807	547	671		1535	1440	2576	1850.33				3.89941	4.77515	3.23669			9.08284	8.52071	15.2426					0.00182386	0.000348907	0.000190091	0.000787619		1.14725e-05	9.00208e-06	1.01193e-05	1.0198e-05		77.233
NM_133925	731	216	244	168	209.333		339	491	1085	638.333				0.295486	0.333789	0.229822			0.463748	0.671683	1.48427					0.000138207	2.43891e-05	1.34975e-05	5.86977e-05		5.8576e-07	7.09629e-07	9.85377e-07	7.60255e-07		77.2079
NM_028199	481	165	319	349	277.667		280	387	1212	626.333				0.343035	0.663202	0.725572			0.582121	0.804574	2.51975					0.000160447	4.84584e-05	4.2613e-05	8.38394e-05		7.35276e-07	8.50027e-07	1.67281e-06	1.08604e-06		77.1974
NM_178684	223	226	396	317	313		227	762	1346	778.333				1.01345	1.77578	1.42152			1.01794	3.41704	6.03587					0.000474019	0.000129752	8.34865e-05	0.000229086		1.28575e-06	3.61008e-06	4.0071e-06	2.96765e-06		77.1945
NM_182782	570	97	141	124	120.667		165	221	563	316.333				0.170175	0.247368	0.217544			0.289474	0.387719	0.987719					7.95956e-05	1.80746e-05	1.27764e-05	3.68155e-05		3.65634e-07	4.09623e-07	6.55728e-07	4.76995e-07		77.1822
NM_007486	181	2496	3189	2388	2691		4459	4363	14643	7821.67				13.7901	17.6188	13.1934			24.6354	24.105	80.9006					0.00644998	0.00128736	0.00077485	0.0028374		3.11169e-05	2.54668e-05	5.37083e-05	3.6764e-05		77.1787
NM_001111102	555	2748	5560	3551	3953		6781	6308	14145	9078				4.95135	10.018	6.3982			12.218	11.3658	25.4865					0.00231588	0.00073199	0.000375768	0.00114121		1.54326e-05	1.20079e-05	1.692e-05	1.47868e-05		77.1778
NM_001093753	457	360	439	336	378.333		850	783	1437	1023.33				0.787746	0.960613	0.73523			1.85996	1.71335	3.14442					0.00036845	7.01894e-05	4.31802e-05	0.000160607		2.34931e-06	1.81014e-06	2.08752e-06	2.08232e-06		77.1285
NM_198326	353	598	536	379	504.333		1112	1158	2708	1659.33				1.69405	1.51841	1.07365			3.15014	3.28045	7.67139					0.000792353	0.000110946	6.3056e-05	0.000322119		3.97894e-06	3.46578e-06	5.09289e-06	4.1792e-06		77.0766
NM_025403	45	325	359	289	324.333		243	841	2015	1033				7.22222	7.97778	6.42222			5.4	18.6889	44.7778					0.00337803	0.000582915	0.000377179	0.00144604		6.82073e-06	1.97447e-05	2.97271e-05	1.87642e-05		77.0639
NM_009281	618	191	214	157	187.333		407	380	853	546.667				0.309061	0.346278	0.254045			0.658576	0.614887	1.38026					0.000144556	2.53016e-05	1.49201e-05	6.15927e-05		8.31846e-07	6.49624e-07	9.16328e-07	7.99266e-07		77.0616
NM_008796	195	187	174	125	162		264	427	921	537.333				0.958974	0.892308	0.641026			1.35385	2.18974	4.72308					0.000448538	6.51986e-05	3.76476e-05	0.000183795		1.71004e-06	2.31345e-06	3.13556e-06	2.38635e-06		77.0192
NM_001002011	646	2760	5727	3675	4054		6839	6464	14365	9222.67				4.27245	8.86533	5.68885			10.5867	10.0062	22.2368					0.00199834	0.000647766	0.000334108	0.000993404		1.3372e-05	1.05715e-05	1.47626e-05	1.2902e-05		76.9959
NM_144870	193	518	474	392	461.333		1240	726	2354	1440				2.68394	2.45596	2.03109			6.42487	3.76166	12.1969					0.00125535	0.00017945	0.000119286	0.000518029		8.11524e-06	3.97417e-06	8.09728e-06	6.7289e-06		76.9857
NM_026565	246	159	244	137	180		166	489	868	507.667				0.646341	0.99187	0.556911			0.674797	1.9878	3.52846					0.000302311	7.24733e-05	3.27075e-05	0.000135831		8.52335e-07	2.1001e-06	2.34247e-06	1.76497e-06		76.9592
NM_011418	366	443	560	378	460.333		628	1161	2249	1346				1.21038	1.53005	1.03279			1.71585	3.17213	6.14481					0.000566128	0.000111797	6.06558e-05	0.000246194		2.16728e-06	3.35134e-06	4.07942e-06	3.19935e-06		76.9512
NM_008094	496	1040	1156	747	981		1920	2479	4449	2949.33				2.09677	2.33065	1.50605			3.87097	4.99798	8.96976					0.000980718	0.000170294	8.84506e-05	0.000413154		4.88941e-06	5.28034e-06	5.95485e-06	5.37487e-06		76.8678
NM_001077411	496	1040	1156	747	981		1920	2479	4449	2949.33				2.09677	2.33065	1.50605			3.87097	4.99798	8.96976					0.000980718	0.000170294	8.84506e-05	0.000413154		4.88941e-06	5.28034e-06	5.95485e-06	5.37487e-06		76.8678
NM_207634	114	3038	3849	2305	3064		7609	4056	15081	8915.33				26.6491	33.7632	20.2193			66.7456	35.5789	132.289					0.0124645	0.00246699	0.00118748	0.00537299		8.43063e-05	3.75889e-05	8.78245e-05	6.99066e-05		76.8596
NM_009777	234	11191	10859	8784	10278		18184	29102	47460	31582				47.8248	46.406	37.5385			77.7094	124.368	202.821					0.0223689	0.00339076	0.00220464	0.00932145		9.81546e-05	0.000131394	0.000134649	0.000121399		76.7836
NM_013680	687	91	103	118	104		131	256	462	283				0.13246	0.149927	0.171761			0.190684	0.372635	0.672489					6.19551e-05	1.09548e-05	1.00876e-05	2.76658e-05		2.40853e-07	3.93686e-07	4.46453e-07	3.60331e-07		76.779
NM_198102	263	366	538	351	418.333		613	869	1985	1155.67				1.39163	2.04563	1.3346			2.3308	3.30418	7.54753					0.000650905	0.000149469	7.83814e-05	0.000292918		2.94403e-06	3.49085e-06	5.01066e-06	3.81518e-06		76.7771
NM_028632	179	433	345	288	355.333		467	812	2621	1300				2.41899	1.92737	1.60894			2.60894	4.53631	14.6425					0.00113143	0.000140828	9.44934e-05	0.000455583		3.29535e-06	4.79259e-06	9.72085e-06	5.93626e-06		76.7458
NM_001005509	562	593	681	491	588.333		567	1902	2881	1783.33				1.05516	1.21174	0.873665			1.0089	3.38434	5.12633					0.000493527	8.85389e-05	5.13106e-05	0.000211125		1.27434e-06	3.57554e-06	3.40328e-06	2.75105e-06		76.7436
NM_001122766	300	212	329	200	247		511	385	1064	653.333				0.706667	1.09667	0.666667			1.70333	1.28333	3.54667					0.000330527	8.01305e-05	3.91535e-05	0.000149937		2.15148e-06	1.35583e-06	2.35456e-06	1.95396e-06		76.735
NM_001165983	1093	1086	1831	1305	1407.33		2595	2281	5535	3470.33				0.993596	1.67521	1.19396			2.3742	2.08692	5.06404					0.000464731	0.000122403	7.01217e-05	0.000219085		2.99885e-06	2.20481e-06	3.36192e-06	2.85519e-06		76.7322
NM_145209	492	229	127	91	149		667	354	559	526.667				0.465447	0.25813	0.184959			1.35569	0.719512	1.13618					0.000217702	1.88609e-05	1.08627e-05	8.24752e-05		1.71237e-06	7.6016e-07	7.54288e-07	1.07561e-06		76.6779
NM_138669	392	1027	1038	824	963		1560	2143	5504	3069				2.6199	2.64796	2.10204			3.97959	5.46684	14.0408					0.0012254	0.000193479	0.000123453	0.00051411		5.02662e-06	5.77568e-06	9.32143e-06	6.70791e-06		76.6423
NM_011390	1064	497	737	441	558.333		1144	1375	1775	1431.33				0.467105	0.692669	0.414474			1.07519	1.29229	1.66823					0.000218478	5.06115e-05	2.43421e-05	9.78104e-05		1.35807e-06	1.3653e-06	1.10751e-06	1.27696e-06		76.5964
NM_007512	87	1230	1416	1134	1260		2264	1612	7787	3887.67				14.1379	16.2759	13.0345			26.023	18.5287	89.5057					0.00661269	0.00118923	0.000765518	0.00285581		3.28696e-05	1.95755e-05	5.94212e-05	3.72888e-05		76.5865
NM_008155	539	4407	8973	5497	6292.33		7789	12572	24986	15115.7				8.17625	16.6475	10.1985			14.4508	23.3247	46.3562					0.00382425	0.00121639	0.000598961	0.00187987		1.82528e-05	2.46424e-05	3.0775e-05	2.45567e-05		76.552
NM_019388	290	113	174	123	136.667		221	370	423	338				0.389655	0.6	0.424138			0.762069	1.27586	1.45862					0.000182252	4.38404e-05	2.49097e-05	8.36674e-05		9.62568e-07	1.34794e-06	9.68351e-07	1.09295e-06		76.5517
NM_001171582	891	644	574	533	583.667		1203	1334	2957	1831.33				0.722783	0.64422	0.598204			1.35017	1.49719	3.31874					0.000338065	4.70715e-05	3.51327e-05	0.00014009		1.7054e-06	1.58178e-06	2.20325e-06	1.83014e-06		76.5459
NM_001093752	492	360	444	343	382.333		854	796	1458	1036				0.731707	0.902439	0.697154			1.73577	1.61789	2.96341					0.000342239	6.59388e-05	4.09441e-05	0.000149707		2.19245e-06	1.70929e-06	1.96735e-06	1.95636e-06		76.5233
NM_177909	625	863	654	384	633.667		1734	1976	2892	2200.67				1.3808	1.0464	0.6144			2.7744	3.1616	4.6272					0.000645837	7.64577e-05	3.60839e-05	0.000252793		3.50434e-06	3.34021e-06	3.07191e-06	3.30549e-06		76.4768
NM_146153	932	714	912	714	780		1511	1574	3337	2140.67				0.766094	0.978541	0.766094			1.62124	1.68884	3.58047					0.000358323	7.14994e-05	4.49929e-05	0.000158272		2.04779e-06	1.78425e-06	2.37701e-06	2.06968e-06		76.4715
NM_007808	86	663	1330	905	966		1601	1465	3692	2252.67				7.7093	15.4651	10.5233			18.6163	17.0349	42.9302					0.00360585	0.00113	0.000618033	0.00178463		2.35142e-05	1.79973e-05	2.85006e-05	2.33373e-05		76.4708
NM_001252537	772	129	134	91	118		261	246	599	368.667				0.167098	0.173575	0.117876			0.338083	0.318653	0.775907					7.81564e-05	1.26827e-05	6.92287e-06	3.25873e-05		4.27032e-07	3.36655e-07	5.1511e-07	4.26265e-07		76.4484
NM_001252538	772	129	134	91	118		261	246	599	368.667				0.167098	0.173575	0.117876			0.338083	0.318653	0.775907					7.81564e-05	1.26827e-05	6.92287e-06	3.25873e-05		4.27032e-07	3.36655e-07	5.1511e-07	4.26265e-07		76.4484
NM_001003913	883	644	574	536	584.667		1210	1334	2959	1834.33				0.729332	0.650057	0.607022			1.37033	1.51076	3.35108					0.000341128	4.74979e-05	3.56505e-05	0.000141426		1.73086e-06	1.59611e-06	2.22472e-06	1.85056e-06		76.4231
NM_001177646	490	7051	5531	4288	5623.33		13186	13921	30700	19269				14.3898	11.2878	8.75102			26.9102	28.4102	62.6531					0.00673049	0.000824767	0.00051395	0.00268974		3.39902e-05	3.00152e-05	4.15942e-05	3.51999e-05		76.4132
NM_007547	490	7051	5531	4288	5623.33		13186	13921	30700	19269				14.3898	11.2878	8.75102			26.9102	28.4102	62.6531					0.00673049	0.000824767	0.00051395	0.00268974		3.39902e-05	3.00152e-05	4.15942e-05	3.51999e-05		76.4132
NM_022018	907	1007	1006	649	887.333		2030	2598	3489	2705.67				1.11025	1.10915	0.715546			2.23815	2.86439	3.84675					0.000519295	8.10427e-05	4.20242e-05	0.000214121		2.827e-06	3.02621e-06	2.55378e-06	2.80233e-06		76.4081
NM_010325	411	773	1397	1323	1164.33		1552	1873	4749	2724.67				1.88078	3.39903	3.21898			3.77616	4.55718	11.5547					0.000879691	0.000248358	0.000189051	0.000439033		4.76966e-06	4.81463e-06	7.67098e-06	5.75175e-06		76.3303
NM_001252536	777	131	134	92	119		261	257	604	374				0.168597	0.172458	0.118404			0.335907	0.330759	0.777349					7.88574e-05	1.26011e-05	6.9539e-06	3.28041e-05		4.24284e-07	3.49445e-07	5.16067e-07	4.29932e-07		76.3007
NM_016806	322	3296	6047	4152	4498.33		10224	7305	12903	10144				10.236	18.7795	12.8944			31.7516	22.6863	40.0714					0.00478766	0.00137217	0.000757292	0.00230571		4.01053e-05	2.3968e-05	2.66027e-05	3.02253e-05		76.284
NM_026390	487	627	630	437	564.667		1030	1526	2820	1792				1.28747	1.29363	0.897331			2.11499	3.13347	5.79055					0.000602186	9.45225e-05	5.27005e-05	0.000249803		2.67144e-06	3.31049e-06	3.84424e-06	3.27539e-06		76.2667
NM_054082	572	391	307	290	329.333		659	816	1841	1105.33				0.683566	0.536713	0.506993			1.1521	1.42657	3.21853					0.000319722	3.92162e-05	2.97758e-05	0.000129571		1.45521e-06	1.50717e-06	2.13672e-06	1.6997e-06		76.232
NM_021335	206	784	840	551	725		846	2046	4237	2376.33				3.80583	4.07767	2.67476			4.1068	9.93204	20.568					0.00178009	0.000297945	0.000157089	0.00074504		5.18729e-06	1.04931e-05	1.36547e-05	9.77837e-06		76.1927
NM_011293	98	164	186	149	166.333		359	183	984	508.667				1.67347	1.89796	1.52041			3.66327	1.86735	10.0408					0.000782727	0.000138679	8.9294e-05	0.0003369		4.62706e-06	1.97284e-06	6.66591e-06	4.42194e-06		76.1883
NM_001252534	781	131	134	92	119		259	258	609	375.333				0.167734	0.171575	0.117798			0.331626	0.330346	0.77977					7.84535e-05	1.25365e-05	6.91829e-06	3.26361e-05		4.18876e-07	3.49008e-07	5.17674e-07	4.2852e-07		76.1602
NM_001171052	567	396	310	286	330.667		669	819	1868	1118.67				0.698413	0.546737	0.504409			1.17989	1.44444	3.29453					0.000326666	3.99486e-05	2.96241e-05	0.00013208		1.49032e-06	1.52605e-06	2.18718e-06	1.73452e-06		76.1479
NM_025649	257	146	131	122	133		234	356	672	420.667				0.568093	0.509728	0.474708			0.910506	1.38521	2.61479					0.000265713	3.72445e-05	2.78797e-05	0.000110279		1.15006e-06	1.46347e-06	1.73591e-06	1.44981e-06		76.0643
NM_001206385	484	237	340	280	285.667		607	472	1107	728.667				0.489669	0.702479	0.578512			1.25413	0.975207	2.28719					0.000229032	5.13283e-05	3.39762e-05	0.000104779		1.58409e-06	1.0303e-06	1.51842e-06	1.3776e-06		76.0586
NM_144888	484	237	340	280	285.667		607	472	1107	728.667				0.489669	0.702479	0.578512			1.25413	0.975207	2.28719					0.000229032	5.13283e-05	3.39762e-05	0.000104779		1.58409e-06	1.0303e-06	1.51842e-06	1.3776e-06		76.0586
NM_025578	152	174	215	174	187.667		385	286	939	536.667				1.14474	1.41447	1.14474			2.53289	1.88158	6.17763					0.000535424	0.000103352	6.72307e-05	0.000235336		3.1993e-06	1.98788e-06	4.10121e-06	3.09613e-06		76.0096
NM_017393	253	113	139	117	123		219	210	634	354.333				0.44664	0.549407	0.462451			0.865613	0.83004	2.50593					0.000208906	4.01437e-05	2.71598e-05	9.20697e-05		1.09335e-06	8.76932e-07	1.66364e-06	1.21131e-06		76.0085
NM_138680	373	554	627	398	526.333		1279	1119	2294	1564				1.48525	1.68097	1.06702			3.42895	3	6.15013					0.000694693	0.000122824	6.26666e-05	0.000293395		4.33111e-06	3.16948e-06	4.08296e-06	3.86118e-06		75.9857
NM_001122765	333	223	362	218	267.667		527	452	1124	701				0.66967	1.08709	0.654655			1.58258	1.35736	3.37538					0.000313222	7.94306e-05	3.8448e-05	0.0001437		1.99896e-06	1.43404e-06	2.24085e-06	1.89128e-06		75.9804
NM_008035	232	1383	3820	4234	3145.67		2652	3212	13144	6336				5.96121	16.4655	18.25			11.431	13.8448	56.6552					0.00278822	0.00120309	0.00107183	0.00168771		1.44385e-05	1.4627e-05	3.76123e-05	2.22259e-05		75.9344
NM_146091	522	824	994	1032	950		1261	2496	3918	2558.33				1.57854	1.90421	1.97701			2.41571	4.78161	7.50575					0.000738327	0.000139136	0.00011611	0.000331191		3.05128e-06	5.05174e-06	4.98292e-06	4.36198e-06		75.9268
NM_001122829	1105	597	985	818	800		1411	1495	2858	1921.33				0.540271	0.891403	0.740271			1.27692	1.35294	2.58643					0.000252699	6.51325e-05	4.34763e-05	0.000120436		1.61288e-06	1.42937e-06	1.71708e-06	1.58644e-06		75.9157
NM_001163505	517	824	992	1026	947.333		1261	2496	3911	2556				1.59381	1.91876	1.98453			2.43907	4.82785	7.5648					0.000745468	0.000140199	0.000116552	0.000334073		3.08079e-06	5.1006e-06	5.02213e-06	4.40117e-06		75.9055
NM_026040	422	104	125	94	107.667		182	173	635	330				0.246445	0.296209	0.222749			0.43128	0.409953	1.50474					0.000115269	2.16432e-05	1.30821e-05	4.99981e-05		5.44749e-07	4.33112e-07	9.98968e-07	6.58943e-07		75.8763
NM_001042709	684	193	330	267	263.333		340	584	1006	643.333				0.282164	0.482456	0.390351			0.497076	0.853801	1.47076					0.000131976	3.52518e-05	2.29254e-05	6.33843e-05		6.27856e-07	9.02036e-07	9.7641e-07	8.35434e-07		75.8699
NM_030609	194	1175	2678	2399	2084		1280	3849	9037	4722				6.0567	13.8041	12.366			6.59794	19.8402	46.5825					0.00283288	0.00100863	0.000726257	0.00152259		8.33384e-06	2.09611e-05	3.09252e-05	2.00734e-05		75.8512
NM_001253848	313	136	134	138	136		180	263	858	433.667				0.434505	0.428115	0.440895			0.57508	0.840256	2.74121					0.00020323	3.12812e-05	2.58938e-05	8.68015e-05		7.26382e-07	8.87725e-07	1.81984e-06	1.14465e-06		75.8325
NM_024469	391	262	230	80	190.667		609	632	697	646				0.670077	0.588235	0.204604			1.55754	1.61637	1.78261					0.000313413	4.29808e-05	1.20164e-05	0.000122803		1.96733e-06	1.70768e-06	1.18344e-06	1.61949e-06		75.8286
NM_001165984	1088	1083	1833	1305	1407		2660	2292	5537	3496.33				0.995404	1.68474	1.19945			2.44485	2.10662	5.08915					0.000465577	0.0001231	7.04439e-05	0.000219707		3.08809e-06	2.22563e-06	3.37859e-06	2.89744e-06		75.828
NM_011408	359	1384	1472	731	1195.67		3715	2393	4984	3697.33				3.85515	4.10028	2.03621			10.3482	6.66574	13.883					0.00180316	0.000299597	0.000119587	0.000740781		1.30708e-05	7.04231e-06	9.21667e-06	9.77659e-06		75.7709
NM_026964	198	191	189	171	183.667		384	339	982	568.333				0.964646	0.954545	0.863636			1.93939	1.71212	4.9596					0.000451191	6.97461e-05	5.07216e-05	0.000190553		2.44965e-06	1.80885e-06	3.29258e-06	2.51702e-06		75.7056
NM_001146100	899	691	1084	677	817.333		1438	1691	3372	2167				0.768632	1.20578	0.753059			1.59956	1.88098	3.75083					0.00035951	8.81035e-05	4.42273e-05	0.000163947		2.0204e-06	1.98724e-06	2.49011e-06	2.16592e-06		75.694
NM_007476	162	1757	2286	1590	1877.67		2892	4274	9237	5467.67				10.8457	14.1111	9.81481			17.8519	26.3827	57.0185					0.00507282	0.00103106	0.000576427	0.00222677		2.25486e-05	2.78732e-05	3.78535e-05	2.94251e-05		75.6758
NM_001130408	162	1757	2286	1590	1877.67		2892	4274	9237	5467.67				10.8457	14.1111	9.81481			17.8519	26.3827	57.0185					0.00507282	0.00103106	0.000576427	0.00222677		2.25486e-05	2.78732e-05	3.78535e-05	2.94251e-05		75.6758
NM_011970	182	985	1383	1111	1159.67		1602	2184	5958	3248				5.41209	7.5989	6.1044			8.8022	12	32.7363					0.00253138	0.000555232	0.000358513	0.00114837		1.1118e-05	1.26779e-05	2.1733e-05	1.51763e-05		75.6688
NM_053109	188	335	396	280	337		729	753	1439	973.667				1.78191	2.10638	1.48936			3.87766	4.00532	7.65426					0.000833449	0.000153908	8.74706e-05	0.000358276		4.89787e-06	4.2316e-06	5.08151e-06	4.73699e-06		75.6336
NM_008369	377	73	164	102	113		245	139	351	245				0.193634	0.435013	0.270557			0.649867	0.3687	0.931034					9.05678e-05	3.17853e-05	1.58899e-05	4.6081e-05		8.20846e-07	3.8953e-07	6.18096e-07	6.09491e-07		75.6057
NM_011155	480	338	370	240	316		672	634	1682	996				0.704167	0.770833	0.5			1.4	1.32083	3.50417					0.000329358	5.63228e-05	2.93651e-05	0.000138349		1.76834e-06	1.39545e-06	2.32635e-06	1.83005e-06		75.5984
NM_008695	1384	228	379	234	280.333		558	771	662	663.667				0.16474	0.273844	0.169075			0.403179	0.557081	0.478324					7.70533e-05	2.00091e-05	9.92983e-06	3.5664e-05		5.09255e-07	5.88553e-07	3.1755e-07	4.71786e-07		75.5937
NM_001001495	189	1127	1099	909	1045		1708	2190	6446	3448				5.96296	5.81481	4.80952			9.03704	11.5873	34.1058					0.00278904	0.000424873	0.000282465	0.00116546		1.14147e-05	1.22419e-05	2.26422e-05	1.54329e-05		75.5177
NM_021498	126	115	125	75	105		313	127	546	328.667				0.912698	0.992063	0.595238			2.48413	1.00794	4.33333					0.000426894	7.24875e-05	3.49585e-05	0.000178113		3.1377e-06	1.06488e-06	2.87682e-06	2.3598e-06		75.4782
NM_001170848	363	549	606	385	513.333		1236	1127	2317	1560				1.5124	1.66942	1.06061			3.40496	3.10468	6.38292					0.000707389	0.00012198	6.22897e-05	0.000297219		4.3008e-06	3.28008e-06	4.2375e-06	3.93946e-06		75.4468
NM_026009	464	699	866	684	749.667		1059	2099	3239	2132.33				1.50647	1.86638	1.47414			2.28233	4.52371	6.9806					0.000704614	0.000136371	8.65765e-05	0.000309187		2.8828e-06	4.77927e-06	4.63429e-06	4.09879e-06		75.4339
NM_145823	249	107	262	139	169.333		206	328	631	388.333				0.429719	1.05221	0.558233			0.827309	1.31727	2.53414					0.000200991	7.68821e-05	3.27852e-05	0.000103553		1.04497e-06	1.39169e-06	1.68237e-06	1.37301e-06		75.4204
NM_025375	262	182	200	176	186		449	289	887	541.667				0.694656	0.763359	0.671756			1.71374	1.10305	3.3855					0.000324909	5.57766e-05	3.94524e-05	0.000140046		2.16462e-06	1.16537e-06	2.24757e-06	1.85919e-06		75.3266
NM_028207	166	252	553	402	402.333		402	775	1639	938.667				1.51807	3.33133	2.42169			2.42169	4.66867	9.87349					0.000710043	0.000243411	0.000142226	0.000365227		3.05883e-06	4.93243e-06	6.55483e-06	4.84869e-06		75.3248
NM_026995	346	154	224	170	182.667		241	280	1064	528.333				0.445087	0.647399	0.491329			0.696532	0.809249	3.07514					0.000208179	4.73037e-05	2.88559e-05	9.47795e-05		8.79788e-07	8.54966e-07	2.04153e-06	1.25876e-06		75.2959
NM_026759	159	332	336	317	328.333		708	555	1740	1001				2.08805	2.11321	1.99371			4.45283	3.49057	10.9434					0.000976637	0.000154407	0.000117091	0.000416045		5.62436e-06	3.68776e-06	7.26511e-06	5.52575e-06		75.2921
NM_010438	926	664	1052	664	793.333		1391	1658	3247	2098.67				0.717063	1.13607	0.717063			1.50216	1.7905	3.50648					0.000335389	8.30096e-05	4.21133e-05	0.000153504		1.89738e-06	1.89165e-06	2.32789e-06	2.03897e-06		75.2851
NM_013683	705	947	728	571	748.667		2475	1714	3163	2450.67				1.34326	1.03262	0.809929			3.51064	2.43121	4.48652					0.00062828	7.54511e-05	4.75673e-05	0.000250433		4.43428e-06	2.56855e-06	2.97852e-06	3.32712e-06		75.2702
NM_001039507	740	119	94	104	105.667		195	228	641	354.667				0.160811	0.127027	0.140541			0.263514	0.308108	0.866216					7.52155e-05	9.28153e-06	8.25398e-06	3.0917e-05		3.32843e-07	3.25514e-07	5.75065e-07	4.11141e-07		75.1981
NM_011454	358	593	662	796	683.667		872	604	4847	2107.67				1.65642	1.84916	2.22346			2.43575	1.68715	13.5391					0.000774754	0.000135113	0.000130585	0.000346817		3.0766e-06	1.78246e-06	8.98836e-06	4.61581e-06		75.1369
NM_026322	214	77	217	191	161.667		181	221	569	323.667				0.359813	1.01402	0.892523			0.845794	1.03271	2.65888					0.000168294	7.40917e-05	5.24181e-05	9.8268e-05		1.06832e-06	1.09105e-06	1.76518e-06	1.30818e-06		75.1179
NM_001253712	214	77	217	191	161.667		181	221	569	323.667				0.359813	1.01402	0.892523			0.845794	1.03271	2.65888					0.000168294	7.40917e-05	5.24181e-05	9.8268e-05		1.06832e-06	1.09105e-06	1.76518e-06	1.30818e-06		75.1179
NM_026631	134	222	336	216	258		482	339	1375	732				1.65672	2.50746	1.61194			3.59701	2.52985	10.2612					0.000774891	0.000183214	9.46697e-05	0.000350925		4.54338e-06	2.67277e-06	6.81221e-06	4.67612e-06		75.0461
NM_008250	457	156	206	206	189.333		351	301	863	505				0.341357	0.450766	0.450766			0.768053	0.658643	1.8884					0.000159662	3.29363e-05	2.64736e-05	7.30238e-05		9.70126e-07	6.95853e-07	1.25367e-06	9.73218e-07		75.0334
NM_024206	303	609	759	600	656		871	1369	3704	1981.33				2.0099	2.50495	1.9802			2.87459	4.51815	12.2244					0.000940085	0.00018303	0.000116298	0.000413137		3.63089e-06	4.7734e-06	8.11556e-06	5.50662e-06		75.0256
NM_001001181	53	302	328	246	292		566	831	1209	868.667				5.69811	6.18868	4.64151			10.6792	15.6792	22.8113					0.00266516	0.000452191	0.000272597	0.00112998		1.34889e-05	1.6565e-05	1.5144e-05	1.5066e-05		75.0022
NM_001145960	487	3731	5319	6786	5278.67		7186	7820	24782	13262.7				7.66119	10.922	13.9343			14.7556	16.0575	50.8871					0.00358334	0.00079804	0.000818364	0.00173325		1.86378e-05	1.69646e-05	3.3783e-05	2.31285e-05		74.9401
NM_011089	661	1327	1174	553	1018		2673	3792	3747	3404				2.00756	1.7761	0.836611			4.04387	5.73676	5.66868					0.000938992	0.000129775	4.91344e-05	0.000372634		5.10781e-06	6.06085e-06	3.76333e-06	4.97733e-06		74.8661
NM_001199330	384	129	105	82	105.333		229	307	542	359.333				0.335938	0.273438	0.213542			0.596354	0.799479	1.41146					0.000157127	1.99794e-05	1.25414e-05	6.32159e-05		7.53254e-07	8.44645e-07	9.3704e-07	8.4498e-07		74.8135
NM_025698	205	401	687	459	515.667		693	1137	2202	1344				1.9561	3.35122	2.23902			3.38049	5.54634	10.7415					0.000914919	0.000244865	0.000131498	0.000430428		4.26989e-06	5.85968e-06	7.13105e-06	5.75354e-06		74.8109
NM_145529	698	220	318	199	245.667		432	640	935	669				0.315186	0.455587	0.2851			0.618911	0.916905	1.33954					0.000147421	3.32886e-05	1.6744e-05	6.58179e-05		7.81746e-07	9.68705e-07	8.89296e-07	8.79916e-07		74.8002
NM_026065	123	185	164	175	174.667		338	266	1125	576.333				1.50407	1.33333	1.42276			2.74797	2.1626	9.14634					0.000703492	9.74232e-05	8.35593e-05	0.000294825		3.47095e-06	2.28478e-06	6.07208e-06	3.9426e-06		74.7792
NM_012037	387	1400	2939	2196	2178.33		2164	4231	9268	5221				3.61757	7.59432	5.67442			5.59173	10.9328	23.9483					0.00169204	0.000554897	0.00033326	0.000860064		7.06291e-06	1.15505e-05	1.58988e-05	1.15041e-05		74.7617
NM_019390	443	2396	4780	3031	3402.33		6179	5672	12428	8093				5.40858	10.7901	6.84199			13.9481	12.8036	28.0542					0.00252974	0.000788402	0.000401832	0.00123999		1.76178e-05	1.35269e-05	1.86246e-05	1.65898e-05		74.7442
NM_008853	376	121	140	138	133		264	240	626	376.667				0.321809	0.37234	0.367021			0.702128	0.638298	1.66489					0.000150518	2.72059e-05	2.15553e-05	6.64266e-05		8.86856e-07	6.74358e-07	1.10529e-06	8.88835e-07		74.7344
NM_011426	1682	5236	3232	1846	3438		16339	9073	10909	12107				3.11296	1.92152	1.0975			9.71403	5.39417	6.48573					0.00145602	0.000140401	6.44566e-05	0.000553624		1.22698e-05	5.69891e-06	4.30575e-06	7.42481e-06		74.564
NM_028475	1086	1052	1817	1283	1384		2664	2254	5489	3469				0.968692	1.67311	1.1814			2.45304	2.07551	5.05433					0.000453083	0.00012225	6.93839e-05	0.000214906		3.09843e-06	2.19276e-06	3.35547e-06	2.88222e-06		74.5626
NM_146176	732	126	201	144	157		320	248	655	407.667				0.172131	0.27459	0.196721			0.437158	0.338798	0.894809					8.05104e-05	2.00636e-05	1.15535e-05	3.73758e-05		5.52174e-07	3.57938e-07	5.94047e-07	5.01386e-07		74.545
NM_029934	454	164	318	215	232.333		366	418	915	566.333				0.361233	0.700441	0.473568			0.806167	0.920705	2.01542					0.000168959	5.11793e-05	2.78128e-05	8.26502e-05		1.01827e-06	9.72719e-07	1.338e-06	1.10966e-06		74.4824
NM_001165987	964	1022	1717	1194	1311		2480	2262	5308	3350				1.06017	1.78112	1.23859			2.57261	2.34647	5.50622					0.000495868	0.000130142	7.27427e-05	0.000232918		3.24946e-06	2.47903e-06	3.65548e-06	3.12799e-06		74.4623
NM_001165988	964	1022	1717	1194	1311		2480	2262	5308	3350				1.06017	1.78112	1.23859			2.57261	2.34647	5.50622					0.000495868	0.000130142	7.27427e-05	0.000232918		3.24946e-06	2.47903e-06	3.65548e-06	3.12799e-06		74.4623
NM_001077364	182	111	143	81	111.667		221	198	623	347.333				0.60989	0.785714	0.445055			1.21429	1.08791	3.42308					0.000285262	5.74101e-05	2.61382e-05	0.000122937		1.53376e-06	1.14937e-06	2.27252e-06	1.65188e-06		74.4222
NM_026211	216	1097	1277	844	1072.67		1650	2548	6086	3428				5.0787	5.91204	3.90741			7.63889	11.7963	28.1759					0.00237545	0.000431977	0.000229483	0.0010123		9.64867e-06	1.24627e-05	1.87055e-05	1.36056e-05		74.4033
NM_029572	387	812	1316	723	950.333		1632	2172	3936	2580				2.09819	3.40052	1.86822			4.21705	5.6124	10.1705					0.00098138	0.000248467	0.000109721	0.000446523		5.32655e-06	5.92947e-06	6.75203e-06	6.00268e-06		74.3872
NM_008425	409	208	232	396	278.667		427	436	1278	713.667				0.508557	0.567237	0.968215			1.04401	1.06601	3.12469					0.000237866	4.14465e-05	5.68635e-05	0.000112059		1.31869e-06	1.12624e-06	2.07443e-06	1.50645e-06		74.3859
NM_178772	389	3032	2752	2627	2803.67		3958	7461	16511	9310				7.79434	7.07455	6.75321			10.1748	19.1799	42.4447					0.00364562	0.000516919	0.000396618	0.00151972		1.28518e-05	2.02635e-05	2.81783e-05	2.04312e-05		74.3824
NM_001252083	535	198	195	155	182.667		396	409	944	583				0.370093	0.364486	0.28972			0.740187	0.764486	1.76449					0.000173103	2.6632e-05	1.70153e-05	7.225e-05		9.34929e-07	8.07675e-07	1.17141e-06	9.71337e-07		74.382
NM_016898	178	202	414	211	275.667		462	714	763	646.333				1.13483	2.32584	1.18539			2.59551	4.01124	4.28652					0.000530791	0.000169943	6.96184e-05	0.000256784		3.27838e-06	4.23785e-06	2.84574e-06	3.45399e-06		74.3443
NM_009546	615	930	1579	1478	1329		1283	2822	5978	3361				1.5122	2.56748	2.40325			2.08618	4.58862	9.72033					0.000707294	0.000187599	0.000141144	0.000345346		2.63505e-06	4.84785e-06	6.45314e-06	4.64535e-06		74.3423
NM_175101	242	515	669	461	548.333		845	1293	2757	1631.67				2.1281	2.76446	1.90496			3.49174	5.34298	11.3926					0.000995369	0.000201992	0.000111879	0.000436413		4.41041e-06	5.64482e-06	7.56331e-06	5.87284e-06		74.3104
NM_019816	507	125	146	105	125.333		324	213	571	369.333				0.246548	0.287968	0.207101			0.639053	0.420118	1.12623					0.000115317	2.10411e-05	1.21631e-05	4.95071e-05		8.07187e-07	4.43852e-07	7.47685e-07	6.66241e-07		74.3081
NM_013481	713	359	420	309	362.667		790	744	1707	1080.33				0.503506	0.58906	0.43338			1.10799	1.04348	2.39411					0.000235503	4.30411e-05	2.54525e-05	0.000101332		1.39951e-06	1.10243e-06	1.5894e-06	1.36378e-06		74.3026
NM_019920	105	190	229	149	189.333		269	440	1107	605.333				1.80952	2.18095	1.41905			2.5619	4.19048	10.5429					0.000846363	0.000159356	8.3341e-05	0.00036302		3.23594e-06	4.42721e-06	6.9992e-06	4.88745e-06		74.276
NM_018749	529	1047	1394	979	1140		1668	2686	5719	3357.67				1.97921	2.63516	1.85066			3.15312	5.0775	10.811					0.000925728	0.000192544	0.00010869	0.000408987		3.9827e-06	5.36435e-06	7.17719e-06	5.50808e-06		74.2522
NM_182650	282	3148	5791	4031	4323.33		10104	7145	12680	9976.33				11.1631	20.5355	14.2943			35.8298	25.3369	44.9645					0.00522129	0.00150047	0.000839509	0.00252042		4.52565e-05	2.67683e-05	2.98511e-05	3.39586e-05		74.2204
NM_019549	331	2082	2090	1620	1930.67		3670	4910	10002	6194				6.29003	6.3142	4.89426			11.0876	14.8338	30.2175					0.00294202	0.000461362	0.000287441	0.00123027		1.40047e-05	1.56719e-05	2.00608e-05	1.65791e-05		74.206
NM_133167	346	430	675	529	544.667		1154	1109	1754	1339				1.24277	1.95087	1.5289			3.33526	3.2052	5.06936					0.000581279	0.000142545	8.97928e-05	0.000271206		4.21276e-06	3.38628e-06	3.36545e-06	3.65483e-06		74.2047
NM_019824	159	4906	6642	4284	5277.33		7212	10532	31085	16276.3				30.8553	41.7736	26.9434			45.3585	66.239	195.503					0.0144319	0.00305229	0.00158239	0.00635552		5.72922e-05	6.99811e-05	0.000129791	8.56881e-05		74.1704
NM_153049	945	231	331	280	280.667		599	556	995	716.667				0.244444	0.350265	0.296296			0.633862	0.58836	1.05291					0.000114333	2.55929e-05	1.74016e-05	5.24426e-05		8.00631e-07	6.21599e-07	6.99007e-07	7.07079e-07		74.1679
NM_008062	496	1575	2005	1006	1528.67		2712	4594	6667	4657.67				3.1754	4.04234	2.02823			5.46774	9.2621	13.4415					0.00148522	0.000295363	0.000119118	0.000633234		6.9063e-06	9.78535e-06	8.92358e-06	8.53841e-06		74.163
NM_024465	379	2666	1924	1916	2168.67		4081	5608	13783	7824				7.0343	5.07652	5.05541			10.7678	14.7968	36.3668					0.00329013	0.000370928	0.000296905	0.00131932		1.36008e-05	1.56328e-05	2.41432e-05	1.77923e-05		74.1514
NM_016799	904	604	679	494	592.333		1437	989	3034	1820				0.668142	0.751106	0.54646			1.5896	1.09403	3.35619					0.000312508	5.48814e-05	3.20937e-05	0.000133161		2.00782e-06	1.15583e-06	2.22811e-06	1.79726e-06		74.0912
NM_145975	1012	633	637	467	579		1367	1475	2575	1805.67				0.625494	0.629447	0.461462			1.35079	1.45751	2.54447					0.00029256	4.5992e-05	2.71018e-05	0.000121885		1.70618e-06	1.53985e-06	1.68922e-06	1.64508e-06		74.0902
NM_152800	302	147	96	90	111		296	267	660	407.667				0.486755	0.317881	0.298013			0.980132	0.884106	2.18543					0.000227668	2.32267e-05	1.75024e-05	8.94658e-05		1.238e-06	9.34053e-07	1.45087e-06	1.20764e-06		74.0831
NM_026790	241	180	837	751	589.333		256	654	2329	1079.67				0.746888	3.47303	3.11618			1.06224	2.71369	9.6639					0.00034934	0.000253765	0.000183014	0.00026204		1.34171e-06	2.867e-06	6.41568e-06	3.54146e-06		73.9919
NM_008925	502	1020	1369	1022	1137		2291	2230	5063	3194.67				2.03187	2.72709	2.03586			4.56375	4.44223	10.0857					0.000950361	0.000199261	0.000119566	0.000423063		5.76446e-06	4.69319e-06	6.69568e-06	5.71778e-06		73.9908
NM_008332	451	466	409	161	345.333		889	1485	1184	1186				1.03326	0.906874	0.356984			1.97118	3.29268	2.62528					0.000483283	6.62629e-05	2.09658e-05	0.000190171		2.48979e-06	3.4787e-06	1.74287e-06	2.57045e-06		73.9833
NM_021528	400	212	301	186	233		496	419	1081	665.333				0.53	0.7525	0.465			1.24	1.0475	2.7025					0.000247895	5.49832e-05	2.73096e-05	0.000110063		1.56624e-06	1.10668e-06	1.79414e-06	1.48902e-06		73.9162
NM_008175	583	25935	24352	21152	23813		63203	51806	106090	73699.7				44.4854	41.7702	36.2813			108.41	88.8611	181.973					0.020807	0.00305204	0.00213081	0.00866329		0.000136932	9.38812e-05	0.000120808	0.000117207		73.9143
NM_172252	197	113	198	142	151		181	250	800	410.333				0.573604	1.00508	0.720812			0.918782	1.26904	4.06091					0.00026829	7.34383e-05	4.23335e-05	0.000128021		1.16051e-06	1.34073e-06	2.69596e-06	1.7324e-06		73.8978
NM_172735	462	150	164	163	159		272	339	813	474.667				0.324675	0.354978	0.352814			0.588745	0.733766	1.75974					0.000151859	2.59373e-05	2.07208e-05	6.61725e-05		7.43642e-07	7.7522e-07	1.16826e-06	8.95707e-07		73.8774
NM_001146346	144	3110	4429	3233	3590.67		7823	6470	14957	9750				21.5972	30.7569	22.4514			54.3264	44.9306	103.868					0.0101016	0.00224733	0.00131858	0.00455584		6.86196e-05	4.74689e-05	6.8956e-05	6.16815e-05		73.8607
NM_010129	144	3110	4429	3233	3590.67		7823	6470	14957	9750				21.5972	30.7569	22.4514			54.3264	44.9306	103.868					0.0101016	0.00224733	0.00131858	0.00455584		6.86196e-05	4.74689e-05	6.8956e-05	6.16815e-05		73.8607
NM_139295	126	366	589	381	445.333		541	1066	2103	1236.67				2.90476	4.6746	3.02381			4.29365	8.46032	16.6905					0.00135864	0.000341561	0.000177589	0.000625928		5.4233e-06	8.93827e-06	1.10805e-05	8.48069e-06		73.8063
NM_176808	126	366	589	381	445.333		541	1066	2103	1236.67				2.90476	4.6746	3.02381			4.29365	8.46032	16.6905					0.00135864	0.000341561	0.000177589	0.000625928		5.4233e-06	8.93827e-06	1.10805e-05	8.48069e-06		73.8063
NM_146094	428	544	590	483	539		1201	992	2788	1660.33				1.27103	1.3785	1.1285			2.80607	2.31776	6.51402					0.000594494	0.000100724	6.62774e-05	0.000253832		3.54435e-06	2.4487e-06	4.32453e-06	3.43919e-06		73.8056
NM_007381	411	515	805	568	629.333		610	1658	3002	1756.67				1.25304	1.95864	1.382			1.48418	4.03406	7.30414					0.000586081	0.000143112	8.11649e-05	0.000270119		1.87467e-06	4.26196e-06	4.84908e-06	3.6619e-06		73.7648
NM_001042708	697	193	338	270	267		369	589	1033	663.667				0.276901	0.484935	0.387374			0.529412	0.84505	1.48207					0.000129514	3.5433e-05	2.27506e-05	6.25659e-05		6.68699e-07	8.9279e-07	9.83915e-07	8.48468e-07		73.7398
NM_008064	934	668	600	425	564.333		1471	1466	2656	1864.33				0.715203	0.642398	0.455032			1.57495	1.56959	2.84368					0.00033452	4.69384e-05	2.67242e-05	0.000136061		1.98931e-06	1.65827e-06	1.88787e-06	1.84515e-06		73.7398
NM_001159324	934	668	600	425	564.333		1471	1466	2656	1864.33				0.715203	0.642398	0.455032			1.57495	1.56959	2.84368					0.00033452	4.69384e-05	2.67242e-05	0.000136061		1.98931e-06	1.65827e-06	1.88787e-06	1.84515e-06		73.7398
NM_001254735	213	344	409	370	374.333		690	847	1684	1073.67				1.61502	1.92019	1.73709			3.23944	3.97653	7.9061					0.00075539	0.000140303	0.00010202	0.000332571		4.09173e-06	4.20118e-06	5.24871e-06	4.51387e-06		73.6775
NM_026277	384	162	204	136	167.333		320	361	834	505				0.421875	0.53125	0.354167			0.833333	0.940104	2.17188					0.000197322	3.8817e-05	2.08003e-05	8.56465e-05		1.05258e-06	9.93214e-07	1.44187e-06	1.16255e-06		73.671
NM_029847	537	193	211	133	179		270	536	954	586.667				0.359404	0.392924	0.247672			0.502793	0.998138	1.77654					0.000168103	2.87099e-05	1.45459e-05	7.04529e-05		6.35077e-07	1.05453e-06	1.17941e-06	9.56338e-07		73.6695
NM_145353	328	343	361	310	338		799	708	1545	1017.33				1.04573	1.10061	0.945122			2.43598	2.15854	4.71037					0.000489117	8.04187e-05	5.55073e-05	0.000208348		3.07688e-06	2.28048e-06	3.12712e-06	2.82816e-06		73.6689
NM_011121	584	208	530	443	393.667		284	747	1585	872				0.356164	0.907534	0.758562			0.486301	1.27911	2.71404					0.000166588	6.63111e-05	4.45505e-05	9.24831e-05		6.14246e-07	1.35137e-06	1.8018e-06	1.25581e-06		73.6444
NM_145516	202	677	905	833	805		1237	1351	4327	2305				3.35149	4.4802	4.12376			6.12376	6.68812	21.4208					0.00156758	0.000327356	0.00024219	0.000712375		7.73491e-06	7.06596e-06	1.42209e-05	9.67391e-06		73.6388
NM_029751	157	2363	3571	2342	2758.67		6449	5877	9173	7166.33				15.051	22.7452	14.9172			41.0764	37.4331	58.4268					0.00703974	0.00166193	0.000876091	0.00319259		5.18836e-05	3.95479e-05	3.87884e-05	4.34066e-05		73.5507
NM_178141	108	113	130	77	106.667		225	264	522	337				1.0463	1.2037	0.712963			2.08333	2.44444	4.83333					0.000489381	8.79515e-05	4.18725e-05	0.000206402		2.63145e-06	2.58254e-06	3.20876e-06	2.80758e-06		73.5157
NM_001081189	291	181	203	178	187.333		324	486	864	558				0.621993	0.697595	0.611684			1.1134	1.6701	2.96907					0.000290923	5.09714e-05	3.59243e-05	0.00012594		1.40634e-06	1.76445e-06	1.97111e-06	1.71397e-06		73.4784
NM_001164243	264	176	219	176	190.333		390	427	807	541.333				0.666667	0.829545	0.666667			1.47727	1.61742	3.05682					0.000311818	6.06127e-05	3.91535e-05	0.000137195		1.86594e-06	1.7088e-06	2.02936e-06	1.86803e-06		73.4433
NM_001164244	264	176	219	176	190.333		390	427	807	541.333				0.666667	0.829545	0.666667			1.47727	1.61742	3.05682					0.000311818	6.06127e-05	3.91535e-05	0.000137195		1.86594e-06	1.7088e-06	2.02936e-06	1.86803e-06		73.4433
NM_134114	140	472	660	441	524.333		1379	820	2120	1439.67				3.37143	4.71429	3.15			9.85	5.85714	15.1429					0.00157691	0.00034446	0.000185	0.000702123		1.24415e-05	6.18804e-06	1.00531e-05	9.56087e-06		73.4371
NM_008079	665	749	1141	851	913.667		1205	2422	3776	2467.67				1.12632	1.71579	1.2797			1.81203	3.64211	5.6782					0.000526808	0.000125368	7.51571e-05	0.000242444		2.28877e-06	3.84786e-06	3.76965e-06	3.30209e-06		73.4214
NM_008212	295	432	481	370	427.667		652	982	2509	1381				1.46441	1.63051	1.25424			2.21017	3.32881	8.50508					0.000684942	0.000119137	7.36617e-05	0.00029258		2.79166e-06	3.51687e-06	5.64636e-06	3.98497e-06		73.421
NM_028447	424	281	466	300	349		571	718	1531	940				0.662736	1.09906	0.707547			1.3467	1.6934	3.61085					0.000309979	8.03052e-05	4.15544e-05	0.000143946		1.70101e-06	1.78906e-06	2.39717e-06	1.96242e-06		73.3516
NM_028273	268	177	163	159	166.333		379	324	900	534.333				0.660448	0.608209	0.593284			1.41418	1.20896	3.35821					0.000308909	4.44402e-05	3.48437e-05	0.000129398		1.78625e-06	1.27725e-06	2.22945e-06	1.76432e-06		73.3415
NM_026554	137	234	318	173	241.667		512	536	1107	718.333				1.70803	2.32117	1.26277			3.73723	3.91241	8.08029					0.000798891	0.000169602	7.4163e-05	0.000347552		4.72048e-06	4.13344e-06	5.36435e-06	4.73942e-06		73.3321
NM_009797	267	1753	2382	1701	1945.33		2502	5327	9239	5689.33				6.56554	8.92135	6.37079			9.37079	19.9513	34.603					0.00307088	0.000651859	0.000374158	0.00136563		1.18362e-05	2.10784e-05	2.29723e-05	1.8629e-05		73.3069
NM_172475	1023	85	153	95	111		251	229	320	266.667				0.083089	0.14956	0.0928641			0.245357	0.223851	0.312805					3.88629e-05	1.0928e-05	5.45393e-06	1.84149e-05		3.0991e-07	2.36498e-07	2.07666e-07	2.51358e-07		73.2619
NM_001170849	306	483	554	330	455.667		1122	1031	2101	1418				1.57843	1.81046	1.07843			3.66667	3.36928	6.86601					0.000738275	0.000132285	6.33365e-05	0.000311299		4.63136e-06	3.55962e-06	4.55822e-06	4.24973e-06		73.2514
NM_053158	317	245	212	171	209.333		353	586	1279	739.333				0.772871	0.66877	0.539432			1.11356	1.84858	4.0347					0.000361492	4.88652e-05	3.1681e-05	0.000147346		1.40654e-06	1.95301e-06	2.67856e-06	2.01271e-06		73.208
NM_139143	746	600	505	376	493.667		1321	1276	2451	1682.67				0.80429	0.676944	0.504021			1.77078	1.71046	3.28552					0.000376188	4.94625e-05	2.96013e-05	0.000151751		2.23667e-06	1.80709e-06	2.1812e-06	2.07498e-06		73.1334
NM_013463	402	1169	1250	1064	1161		1937	2575	6649	3720.33				2.90796	3.10945	2.64677			4.81841	6.40547	16.5398					0.00136013	0.0002272	0.000155445	0.000580925		6.08612e-06	6.76734e-06	1.09805e-05	7.94464e-06		73.1216
NM_145564	608	150	279	207	212		292	343	1015	550				0.246711	0.458882	0.340461			0.480263	0.564145	1.66941					0.000115393	3.35293e-05	1.99953e-05	5.63059e-05		6.0662e-07	5.96015e-07	1.10829e-06	7.70308e-07		73.0953
NM_026936	414	485	374	339	399.333		928	909	2437	1424.67				1.1715	0.903382	0.818841			2.24155	2.19565	5.88647					0.000547941	6.60077e-05	4.80907e-05	0.00022068		2.83129e-06	2.31969e-06	3.90792e-06	3.01963e-06		73.0816
NM_001167767	217	153	303	210	222		275	400	1027	567.333				0.705069	1.39631	0.967742			1.26728	1.84332	4.73272					0.00032978	0.000102025	5.68357e-05	0.00016288		1.6007e-06	1.94745e-06	3.14196e-06	2.23004e-06		73.0391
NM_011034	180	10853	24775	16152	17260		15585	40687	67186	41152.7				60.2944	137.639	89.7333			86.5833	226.039	373.256					0.0282013	0.0100569	0.00527006	0.0145094		0.000109363	0.000238809	0.000247797	0.000198656		73.0378
NM_178601	272	210	392	347	316.333		421	620	1255	765.333				0.772059	1.44118	1.27574			1.54779	2.27941	4.61397					0.000361113	0.000105303	7.49243e-05	0.000180447		1.95502e-06	2.40818e-06	3.06313e-06	2.47544e-06		72.8947
NM_025557	49	83	96	168	115.667		180	118	621	306.333				1.69388	1.95918	3.42857			3.67347	2.40816	12.6735					0.000792272	0.000143152	0.000201361	0.000378928		4.63995e-06	2.54421e-06	8.41368e-06	5.19928e-06		72.8809
NM_010764	994	6586	8160	5634	6793.33		12629	18068	30066	20254.3				6.62575	8.20926	5.66801			12.7052	18.1771	30.2475					0.00309904	0.000599829	0.000332884	0.00134392		1.6048e-05	1.9204e-05	2.00807e-05	1.84442e-05		72.864
NM_001037941	242	115	277	147	179.667		400	225	590	405				0.475207	1.14463	0.607438			1.65289	0.929752	2.43802					0.000222267	8.3635e-05	3.5675e-05	0.000113859		2.08777e-06	9.82277e-07	1.61855e-06	1.56287e-06		72.8527
NM_025587	64	780	1564	1585	1309.67		2525	1722	4288	2845				12.1875	24.4375	24.7656			39.4531	26.9062	67					0.00570042	0.00178558	0.00145449	0.00298017		4.98332e-05	2.84263e-05	4.448e-05	4.09132e-05		72.8412
NM_011655	425	10500	14475	12876	12617		15749	24205	70637	36863.7				24.7059	34.0588	30.2965			37.0565	56.9529	166.205					0.0115556	0.00248859	0.00177932	0.0052745		4.6806e-05	6.01704e-05	0.00011034	7.24389e-05		72.8132
NM_008228	463	630	1029	673	777.333		1418	1703	3061	2060.67				1.36069	2.22246	1.45356			3.06263	3.67819	6.61123					0.000636432	0.000162389	8.53682e-05	0.00029473		3.86841e-06	3.88598e-06	4.38907e-06	4.04782e-06		72.812
NM_001166672	661	1248	1050	555	951		2417	3560	4075	3350.67				1.88805	1.5885	0.839637			3.65658	5.38578	6.1649					0.000883091	0.000116068	4.93121e-05	0.00034949		4.61862e-06	5.69004e-06	4.09276e-06	4.80048e-06		72.8033
NM_001166623	372	139	268	233	213.333		231	357	1026	538				0.373656	0.72043	0.626344			0.620968	0.959677	2.75806					0.000174769	5.26399e-05	3.67853e-05	8.80647e-05		7.84343e-07	1.01389e-06	1.83103e-06	1.20975e-06		72.7955
NM_011252	372	139	268	233	213.333		231	357	1026	538				0.373656	0.72043	0.626344			0.620968	0.959677	2.75806					0.000174769	5.26399e-05	3.67853e-05	8.80647e-05		7.84343e-07	1.01389e-06	1.83103e-06	1.20975e-06		72.7955
NM_001122780	570	97	141	124	120.667		179	230	598	335.667				0.170175	0.247368	0.217544			0.314035	0.403509	1.04912					7.95956e-05	1.80746e-05	1.27764e-05	3.68155e-05		3.96657e-07	4.26305e-07	6.96493e-07	5.06485e-07		72.6883
NM_029652	570	97	141	124	120.667		179	230	598	335.667				0.170175	0.247368	0.217544			0.314035	0.403509	1.04912					7.95956e-05	1.80746e-05	1.27764e-05	3.68155e-05		3.96657e-07	4.26305e-07	6.96493e-07	5.06485e-07		72.6883
NM_175026	401	577	462	311	450		1112	1422	2292	1608.67				1.4389	1.15212	0.775561			2.77307	3.54613	5.71571					0.000673013	8.41824e-05	4.55489e-05	0.000267582		3.50266e-06	3.74647e-06	3.79455e-06	3.68123e-06		72.6882
NM_011234	320	113	195	227	178.333		174	329	813	438.667				0.353125	0.609375	0.709375			0.54375	1.02812	2.54062					0.000165166	4.45254e-05	4.16618e-05	8.37844e-05		6.8681e-07	1.08621e-06	1.68667e-06	1.15323e-06		72.652
NM_175121	485	1180	1095	832	1035.67		3041	2509	4338	3296				2.43299	2.25773	1.71546			6.2701	5.1732	8.94433					0.00113797	0.000164967	0.00010075	0.000467897		7.91976e-06	5.46545e-06	5.93797e-06	6.44106e-06		72.6429
NM_028189	353	114	274	243	210.333		192	351	893	478.667				0.322946	0.776204	0.688385			0.543909	0.994334	2.52975					0.000151051	5.67152e-05	4.0429e-05	8.27316e-05		6.87011e-07	1.05051e-06	1.67945e-06	1.13899e-06		72.636
NM_007435	717	600	885	621	702		1225	1457	3279	1987				0.83682	1.23431	0.866109			1.70851	2.03208	4.57322					0.000391403	9.01878e-05	5.08668e-05	0.000177486		2.15801e-06	2.14688e-06	3.03608e-06	2.44699e-06		72.5324
NM_008133	539	2403	2924	1820	2382.33		4697	6450	10818	7321.67				4.45826	5.42486	3.37662			8.71429	11.9666	20.0705					0.00208525	0.00039638	0.00019831	0.000893312		1.1007e-05	1.26426e-05	1.33244e-05	1.23247e-05		72.4815
NM_183167	387	129	105	82	105.333		229	321	569	373				0.333333	0.271318	0.211886			0.591731	0.829457	1.47028					0.000155909	1.98245e-05	1.24441e-05	6.27259e-05		7.47415e-07	8.76317e-07	9.76094e-07	8.66608e-07		72.3809
NM_010613	729	568	810	739	705.667		1198	1485	3024	1902.33				0.77915	1.11111	1.01372			1.64335	2.03704	4.14815					0.000364429	8.1186e-05	5.95359e-05	0.000168384		2.07571e-06	2.15212e-06	2.75388e-06	2.32723e-06		72.3535
NM_009146	573	595	662	511	589.333		1501	1364	2406	1757				1.03839	1.15532	0.891798			2.61955	2.38045	4.19895					0.000485685	8.44164e-05	5.23755e-05	0.000207492		3.30874e-06	2.51493e-06	2.78761e-06	2.87043e-06		72.2862
NM_001113478	573	595	662	511	589.333		1501	1364	2406	1757				1.03839	1.15532	0.891798			2.61955	2.38045	4.19895					0.000485685	8.44164e-05	5.23755e-05	0.000207492		3.30874e-06	2.51493e-06	2.78761e-06	2.87043e-06		72.2862
NM_007916	459	370	612	428	470		737	1002	2066	1268.33				0.8061	1.33333	0.932462			1.60566	2.18301	4.50109					0.000377035	9.74232e-05	5.47637e-05	0.000176407		2.02811e-06	2.30633e-06	2.98819e-06	2.44088e-06		72.272
NM_001190800	448	225	394	276	298.333		406	622	1372	800				0.502232	0.879464	0.616071			0.90625	1.38839	3.0625					0.000234907	6.42601e-05	3.6182e-05	0.000111783		1.14468e-06	1.46683e-06	2.03314e-06	1.54822e-06		72.2013
NM_007763	58	837	2441	1696	1658		1530	3419	5626	3525				14.431	42.0862	29.2414			26.3793	58.9483	97					0.00674978	0.00307513	0.00171735	0.00384742		3.33197e-05	6.22785e-05	6.43965e-05	5.33315e-05		72.1416
NM_197959	815	118	202	147	155.667		178	237	926	447				0.144785	0.247853	0.180368			0.218405	0.290798	1.1362					6.772e-05	1.81099e-05	1.05931e-05	3.2141e-05		2.75867e-07	3.07226e-07	7.54299e-07	4.45797e-07		72.0978
NM_011088	661	1264	1070	559	964.333		2516	3640	4092	3416				1.91225	1.61876	0.845688			3.80635	5.50681	6.19062					0.000894413	0.000118278	4.96675e-05	0.00035412		4.8078e-06	5.81791e-06	4.10984e-06	4.91185e-06		72.095
NM_011087	661	1264	1070	559	964.333		2516	3640	4092	3416				1.91225	1.61876	0.845688			3.80635	5.50681	6.19062					0.000894413	0.000118278	4.96675e-05	0.00035412		4.8078e-06	5.81791e-06	4.10984e-06	4.91185e-06		72.095
NM_153118	532	489	381	605	491.667		1283	736	2491	1503.33				0.919173	0.716165	1.13722			2.41165	1.38346	4.68233					0.000429922	5.23283e-05	6.67891e-05	0.000183013		3.04616e-06	1.46162e-06	3.10851e-06	2.53876e-06		72.0876
NM_001170853	519	1163	1657	822	1214		1337	4227	5639	3734.33				2.24085	3.19268	1.58382			2.57611	8.14451	10.8651					0.0010481	0.000233281	9.30179e-05	0.000458134		3.25388e-06	8.60462e-06	7.21315e-06	6.35722e-06		72.0652
NM_026302	441	518	657	579	584.667		893	1184	3196	1757.67				1.1746	1.4898	1.31293			2.02494	2.68481	7.24717					0.000549393	0.000108855	7.71084e-05	0.000245119		2.5577e-06	2.83648e-06	4.81126e-06	3.40181e-06		72.0554
NM_007589	130	1865	2255	1616	1912		5744	3173	7699	5538.67				14.3462	17.3462	12.4308			44.1846	24.4077	59.2231					0.00671008	0.00126744	0.000730062	0.00290253		5.58095e-05	2.57866e-05	3.93171e-05	4.03044e-05		72.0152
NM_194342	680	509	626	542	559		1293	1135	2343	1590.33				0.748529	0.920588	0.797059			1.90147	1.66912	3.44559					0.000350107	6.7265e-05	4.68115e-05	0.000154728		2.40174e-06	1.76341e-06	2.28746e-06	2.15087e-06		71.9373
NM_010362	221	361	386	304	350.333		807	671	1897	1125				1.63348	1.74661	1.37557			3.65158	3.0362	8.58371					0.000764024	0.00012762	8.07873e-05	0.000324144		4.61231e-06	3.20773e-06	5.69856e-06	4.5062e-06		71.9329
NM_013482	640	580	776	509	621.667		1328	1589	2439	1785.33				0.90625	1.2125	0.795312			2.075	2.48281	3.81094					0.000423877	8.85942e-05	4.67089e-05	0.000186394		2.62093e-06	2.62308e-06	2.53001e-06	2.59134e-06		71.9294
NM_023603	680	1210	2251	1706	1722.33		1969	4324	6768	4353.67				1.77941	3.31029	2.50882			2.89559	6.35882	9.95294					0.000832279	0.000241874	0.000147344	0.000407166		3.65741e-06	6.71806e-06	6.60757e-06	5.66101e-06		71.9245
NM_029556	319	122	109	110	113.667		191	295	665	383.667				0.382445	0.341693	0.344828			0.598746	0.924765	2.08464					0.00017888	2.49666e-05	2.02518e-05	7.46994e-05		7.56275e-07	9.77008e-07	1.38395e-06	1.03908e-06		71.89
NM_013652	73	494	419	363	425.333		1348	1085	1640	1357.67				6.76712	5.73973	4.9726			18.4658	14.863	22.4658					0.00316517	0.000419387	0.000292042	0.0012922		2.33241e-05	1.57027e-05	1.49146e-05	1.79804e-05		71.8669
NM_025523	57	132	352	270	251.333		259	388	1056	567.667				2.31579	6.17544	4.73684			4.54386	6.80702	18.5263					0.00108316	0.000451223	0.000278196	0.000604192		5.73934e-06	7.19157e-06	1.22993e-05	8.41006e-06		71.8416
NM_001177710	342	118	193	145	152		278	243	716	412.333				0.345029	0.564327	0.423977			0.812865	0.710526	2.09357					0.000161379	4.12339e-05	2.49003e-05	7.58379e-05		1.02673e-06	7.50667e-07	1.38988e-06	1.05576e-06		71.8326
NM_001163434	636	12245	15638	8889	12257.3		25046	37586	47541	36724.3				19.2531	24.5881	13.9764			39.3805	59.0975	74.75					0.00900521	0.00179658	0.000820838	0.00387421		4.97414e-05	6.24361e-05	4.96251e-05	5.39342e-05		71.8322
NM_022310	636	12245	15638	8889	12257.3		25046	37586	47541	36724.3				19.2531	24.5881	13.9764			39.3805	59.0975	74.75					0.00900521	0.00179658	0.000820838	0.00387421		4.97414e-05	6.24361e-05	4.96251e-05	5.39342e-05		71.8322
NM_180588	238	120	181	89	130		282	223	673	392.667				0.504202	0.760504	0.37395			1.18487	0.936975	2.82773					0.000235829	5.5568e-05	2.19622e-05	0.000104453		1.49661e-06	9.89908e-07	1.87728e-06	1.4546e-06		71.8088
NM_178856	166	182	203	238	207.667		352	292	1256	633.333				1.09639	1.22289	1.43373			2.12048	1.75904	7.56627					0.000512809	8.93535e-05	8.42036e-05	0.000228789		2.67838e-06	1.85841e-06	5.0231e-06	3.18663e-06		71.7965
NM_024459	151	535	601	411	515.667		1574	1134	1880	1529.33				3.54305	3.98013	2.72185			10.4238	7.50993	12.4503					0.00165718	0.000290818	0.000159855	0.000702617		1.31663e-05	7.9342e-06	8.26554e-06	9.78869e-06		71.7784
NM_146067	293	165	135	102	134		250	419	810	493				0.56314	0.460751	0.348123			0.853242	1.43003	2.76451					0.000263396	3.36659e-05	2.04453e-05	0.000105836		1.07773e-06	1.51082e-06	1.8353e-06	1.47462e-06		71.7716
NM_001163538	269	170	160	159	163		377	334	862	524.333				0.63197	0.594796	0.591078			1.40149	1.24164	3.20446					0.000295589	4.34601e-05	3.47142e-05	0.000124588		1.77022e-06	1.31178e-06	2.12738e-06	1.73646e-06		71.7483
NM_030083	106	114	190	139	147.667		494	184	350	342.667				1.07547	1.79245	1.31132			4.66038	1.73585	3.30189					0.000503027	0.00013097	7.70142e-05	0.000237004		5.88651e-06	1.83391e-06	2.19206e-06	3.30416e-06		71.7288
NM_026219	92	875	1183	910	989.333		1609	2101	5131	2947				9.51087	12.8587	9.8913			17.4891	22.837	55.7717					0.00444849	0.000939551	0.000580919	0.00198965		2.20905e-05	2.41271e-05	3.70258e-05	2.77478e-05		71.7049
NM_011650	209	369	531	355	418.333		796	963	1832	1197				1.76555	2.54067	1.69856			3.80861	4.60766	8.76555					0.000825795	0.00018564	9.97571e-05	0.000370397		4.81065e-06	4.86796e-06	5.81928e-06	5.16596e-06		71.6996
NM_009593	647	486	488	148	374		1363	1273	1089	1241.67				0.751159	0.75425	0.228748			2.10665	1.96754	1.68315					0.000351337	5.51111e-05	1.34344e-05	0.000139961		2.6609e-06	2.0787e-06	1.11741e-06	1.95234e-06		71.6889
NM_007408	406	6906	12423	11156	10161.7		11715	19771	46977	26154.3				17.0099	30.5985	27.4778			28.8547	48.697	115.707					0.00795596	0.00223575	0.00161378	0.00393517		3.64463e-05	5.14481e-05	7.68156e-05	5.49033e-05		71.6744
NM_172132	1067	168	216	120	168		300	404	918	540.667				0.157451	0.202437	0.112465			0.281162	0.378632	0.860356					7.3644e-05	1.47915e-05	6.60509e-06	3.16802e-05		3.55135e-07	4.00022e-07	5.71174e-07	4.42111e-07		71.6567
NM_175557	565	189	199	152	180		395	410	948	584.333				0.334513	0.352212	0.269027			0.699115	0.725664	1.67788					0.000156461	2.57352e-05	1.58e-05	6.59987e-05		8.83051e-07	7.66659e-07	1.11391e-06	9.21207e-07		71.6437
NM_029272	205	262	471	300	344.333		602	420	1858	960				1.27805	2.29756	1.46341			2.93659	2.04878	9.06341					0.000597778	0.000167877	8.59467e-05	0.000283867		3.7092e-06	2.16452e-06	6.01703e-06	3.96358e-06		71.6188
NM_009537	395	274	382	284	313.333		685	685	1240	870				0.693671	0.967089	0.718987			1.73418	1.73418	3.13924					0.000324448	7.06626e-05	4.22263e-05	0.000145779		2.19044e-06	1.83215e-06	2.08408e-06	2.03556e-06		71.6164
NM_178371	530	164	202	131	165.667		340	421	769	510				0.309434	0.381132	0.24717			0.641509	0.79434	1.45094					0.000144731	2.78483e-05	1.45163e-05	6.23651e-05		8.10289e-07	8.39215e-07	9.63254e-07	8.70919e-07		71.6083
NM_011292	173	3228	4174	3158	3520		5592	7972	18830	10798				18.659	24.1272	18.2543			32.3237	46.0809	108.844					0.0087273	0.00176291	0.00107208	0.0038541		4.0828e-05	4.86842e-05	7.22594e-05	5.39239e-05		71.4729
NM_013820	898	528	856	378	587.333		1244	1537	2184	1655				0.587973	0.953229	0.420935			1.3853	1.71158	2.43207					0.000275011	6.965e-05	2.47216e-05	0.000123127		1.74977e-06	1.80828e-06	1.61461e-06	1.72422e-06		71.4107
NM_134149	279	108	115	158	127		229	281	557	355.667				0.387097	0.412186	0.566308			0.820789	1.00717	1.99642					0.000181056	3.01174e-05	3.32594e-05	8.14775e-05		1.03674e-06	1.06407e-06	1.32538e-06	1.14206e-06		71.3424
NM_001122832	580	284	350	264	299.333		550	649	1593	930.667				0.489655	0.603448	0.455172			0.948276	1.11897	2.74655					0.000229025	4.40924e-05	2.67324e-05	9.99499e-05		1.19777e-06	1.18218e-06	1.82338e-06	1.40111e-06		71.3362
NM_025919	159	2557	3627	2664	2949.33		4864	4627	17555	9015.33				16.0818	22.8113	16.7547			30.5912	29.1006	110.409					0.00752187	0.00166676	0.000984009	0.00339088		3.86397e-05	3.07446e-05	7.32983e-05	4.75609e-05		71.2956
NM_019949	134	941	421	431	597.667		1954	1825	3864	2547.67				7.02239	3.14179	3.21642			14.5821	13.6194	28.8358					0.00328456	0.000229562	0.000188901	0.00123434		1.84186e-05	1.43888e-05	1.91436e-05	1.7317e-05		71.2792
NM_020007	362	1300	1672	1442	1471.33		2748	3322	6718	4262.67				3.59116	4.61878	3.98343			7.59116	9.1768	18.558					0.00167968	0.000337482	0.000233948	0.000750371		9.58838e-06	9.69523e-06	1.23203e-05	1.05346e-05		71.2289
NM_026442	87	146	101	82	109.667		236	317	749	434				1.67816	1.16092	0.942529			2.71264	3.64368	8.6092					0.000784921	8.48253e-05	5.5355e-05	0.000308367		3.42634e-06	3.84952e-06	5.71548e-06	4.33045e-06		71.2091
NM_146033	421	228	220	181	209.667		290	589	1332	737				0.541568	0.522565	0.429929			0.688836	1.39905	3.1639					0.000253306	3.81825e-05	2.52498e-05	0.000105579		8.70068e-07	1.47809e-06	2.10045e-06	1.48287e-06		71.1994
NM_019402	283	136	214	110	153.333		272	409	645	442				0.480565	0.756184	0.388693			0.961131	1.44523	2.27915					0.000224773	5.52524e-05	2.2828e-05	0.000100951		1.214e-06	1.52688e-06	1.51309e-06	1.41799e-06		71.1933
NM_017477	855	871	1454	965	1096.67		1522	2738	4814	3024.67				1.01871	1.70058	1.12865			1.78012	3.20234	5.63041					0.00047648	0.000124257	6.62862e-05	0.000222341		2.24846e-06	3.38325e-06	3.73792e-06	3.12321e-06		71.1899
NM_001159525	188	115	224	205	181.333		326	291	656	424.333				0.611702	1.19149	1.09043			1.73404	1.54787	3.48936					0.00028611	8.7059e-05	6.4041e-05	0.000145736		2.19027e-06	1.63532e-06	2.31652e-06	2.04737e-06		71.1824
NM_009321	89	207	484	219	303.333		399	540	1451	796.667				2.32584	5.4382	2.46067			4.48315	6.06742	16.3034					0.00108786	0.000397355	0.000144516	0.000543243		5.66265e-06	6.41019e-06	1.08235e-05	7.63211e-06		71.1786
NM_030680	1094	604	990	820	804.667		1474	1626	3137	2079				0.552102	0.904936	0.749543			1.34735	1.48629	2.86746					0.000258233	6.61213e-05	4.40208e-05	0.000122792		1.70183e-06	1.57026e-06	1.90365e-06	1.72525e-06		71.1734
NM_001177853	242	319	422	463	401.333		754	598	2000	1117.33				1.31818	1.7438	1.91322			3.1157	2.47107	8.26446					0.000616549	0.000127415	0.000112364	0.000285443		3.93544e-06	2.61068e-06	5.48662e-06	4.01091e-06		71.1665
NM_026362	128	121	270	168	186.333		366	395	501	420.667				0.945312	2.10938	1.3125			2.85938	3.08594	3.91406					0.000442148	0.000154126	7.70835e-05	0.000224453		3.61167e-06	3.26027e-06	2.59847e-06	3.15681e-06		71.1012
NM_001110192	1171	2976	3756	2682	3138		5993	7362	15573	9642.67				2.54142	3.20751	2.29035			5.11785	6.28693	13.2989					0.00118869	0.000234365	0.000134513	0.000519189		6.46435e-06	6.64211e-06	8.82888e-06	7.31178e-06		71.0072
NM_012053	238	2456	3430	2553	2813		6852	4198	13168	8072.67				10.3193	14.4118	10.7269			28.7899	17.6387	55.3277					0.00482663	0.00105303	0.000629993	0.00216988		3.63645e-05	1.86351e-05	3.6731e-05	3.05769e-05		70.9648
NM_011027	576	426	461	303	396.667		1427	760	1398	1195				0.739583	0.800347	0.526042			2.47743	1.31944	2.42708					0.000345923	5.84793e-05	3.08946e-05	0.000145099		3.12924e-06	1.39399e-06	1.61129e-06	2.04484e-06		70.9586
NM_025448	164	560	861	505	642		753	1518	3683	1984.67				3.41463	5.25	3.07927			4.59146	9.2561	22.4573					0.00159712	0.000383604	0.000180846	0.000720522		5.79947e-06	9.77901e-06	1.4909e-05	1.01625e-05		70.9001
NM_134048	471	154	177	187	172.667		240	338	1044	540.667				0.326964	0.375796	0.397028			0.509554	0.717622	2.21656					0.00015293	2.74584e-05	2.33175e-05	6.79019e-05		6.43617e-07	7.58163e-07	1.47153e-06	9.57771e-07		70.8958
NM_011183	429	544	403	347	431.333		1044	1174	2613	1610.33				1.26807	0.939394	0.808858			2.43357	2.7366	6.09091					0.000593108	6.8639e-05	4.75044e-05	0.000236417		3.07383e-06	2.8912e-06	4.04364e-06	3.33622e-06		70.8637
NM_001128605	429	544	403	347	431.333		1044	1174	2613	1610.33				1.26807	0.939394	0.808858			2.43357	2.7366	6.09091					0.000593108	6.8639e-05	4.75044e-05	0.000236417		3.07383e-06	2.8912e-06	4.04364e-06	3.33622e-06		70.8637
NM_178909	338	126	103	96	108.333		281	262	581	374.667				0.372781	0.304734	0.284024			0.831361	0.775148	1.71893					0.00017436	2.22661e-05	1.66808e-05	7.11022e-05		1.05009e-06	8.18939e-07	1.14117e-06	1.0034e-06		70.8613
NM_026036	164	227	324	216	255.667		440	773	963	725.333				1.38415	1.97561	1.31707			2.68293	4.71341	5.87195					0.000647402	0.000144353	7.7352e-05	0.000289702		3.3888e-06	4.97969e-06	3.89828e-06	4.08892e-06		70.8505
NM_029101	261	410	366	258	344.667		1058	600	2000	1219.33				1.57088	1.4023	0.988506			4.05364	2.29885	7.66284					0.000734743	0.000102462	5.80552e-05	0.00029842		5.12015e-06	2.42872e-06	5.08721e-06	4.21203e-06		70.8496
NM_001165985	995	1022	1738	1220	1326.67		2653	2377	5561	3530.33				1.02714	1.74673	1.22613			2.66633	2.38894	5.58894					0.000480419	0.000127629	7.2011e-05	0.000226686		3.36784e-06	2.52391e-06	3.71039e-06	3.20071e-06		70.8237
NM_001165986	995	1022	1738	1220	1326.67		2653	2377	5561	3530.33				1.02714	1.74673	1.22613			2.66633	2.38894	5.58894					0.000480419	0.000127629	7.2011e-05	0.000226686		3.36784e-06	2.52391e-06	3.71039e-06	3.20071e-06		70.8237
NM_021880	362	1928	3110	2646	2561.33		3931	5874	10521	6775.33				5.32597	8.59116	7.30939			10.8591	16.2265	29.0635					0.0024911	0.000627733	0.000429282	0.0011827		1.37161e-05	1.71432e-05	1.92947e-05	1.6718e-05		70.7443
NM_026155	166	1507	1939	1317	1587.67		2557	4668	7397	4874				9.07831	11.6807	7.93373			15.4036	28.1205	44.5602					0.00424617	0.00085348	0.00046595	0.0018552		1.94563e-05	2.97091e-05	2.95827e-05	2.62494e-05		70.676
NM_001110142	951	446	501	437	461.333		655	1458	2209	1440.67				0.46898	0.526814	0.459516			0.688749	1.53312	2.32282					0.000219355	3.84929e-05	2.69875e-05	9.4945e-05		8.69957e-07	1.61974e-06	1.54207e-06	1.34392e-06		70.6477
NM_028288	951	446	501	437	461.333		655	1458	2209	1440.67				0.46898	0.526814	0.459516			0.688749	1.53312	2.32282					0.000219355	3.84929e-05	2.69875e-05	9.4945e-05		8.69957e-07	1.61974e-06	1.54207e-06	1.34392e-06		70.6477
NM_026013	248	386	378	223	329		711	1015	1750	1158.67				1.55645	1.52419	0.899194			2.86694	4.09274	7.05645					0.000727994	0.000111369	5.28099e-05	0.000297391		3.62122e-06	4.32396e-06	4.68464e-06	4.20994e-06		70.6402
NM_184053	296	734	1106	707	849		1553	1378	4793	2574.67				2.47973	3.73649	2.38851			5.24662	4.65541	16.1926					0.00115984	0.000273015	0.000140278	0.000524376		6.627e-06	4.91841e-06	1.07499e-05	7.43178e-06		70.5586
NM_028871	613	495	498	460	484.333		1032	1199	2425	1552				0.807504	0.812398	0.750408			1.68352	1.95595	3.95595					0.000377691	5.93598e-05	4.40716e-05	0.000160374		2.12646e-06	2.06645e-06	2.62628e-06	2.27306e-06		70.5542
NM_001042556	254	332	281	167	260		469	868	1690	1009				1.30709	1.1063	0.65748			1.84646	3.41732	6.65354					0.00061136	8.08344e-05	3.8614e-05	0.000243603		2.33226e-06	3.61038e-06	4.41716e-06	3.45327e-06		70.5427
NM_026126	132	383	449	264	365.333		726	994	1898	1206				2.90152	3.40152	2			5.5	7.5303	14.3788					0.00135712	0.00024854	0.000117461	0.000574372		6.94704e-06	7.95572e-06	9.5458e-06	8.14952e-06		70.4793
NM_001110193	1111	2867	3600	2554	3007		5938	7001	15056	9331.67				2.58056	3.24032	2.29883			5.34473	6.30153	13.5518					0.001207	0.000236762	0.000135011	0.000526256		6.75093e-06	6.65753e-06	8.99675e-06	7.4684e-06		70.4644
NM_001038587	911	504	506	393	467.667		1201	1232	2080	1504.33				0.553238	0.555434	0.431394			1.31833	1.35236	2.28321					0.000258764	4.05841e-05	2.53359e-05	0.000108228		1.66518e-06	1.42876e-06	1.51578e-06	1.53657e-06		70.4347
NM_028595	198	1172	1278	508	986		3064	3402	3124	3196.67				5.91919	6.45455	2.56566			15.4747	17.1818	15.7778					0.00276856	0.000471617	0.000150682	0.00113029		1.95461e-05	1.81525e-05	1.04746e-05	1.60577e-05		70.389
NM_001082536	910	212	321	272	268.333		591	553	962	702				0.232967	0.352747	0.298901			0.649451	0.607692	1.05714					0.000108965	2.57743e-05	1.75545e-05	5.07646e-05		8.2032e-07	6.42023e-07	7.01817e-07	7.21387e-07		70.3708
NM_001114665	590	468	371	587	475.333		1268	721	2445	1478				0.79322	0.628814	0.994915			2.14915	1.22203	4.14407					0.00037101	4.59458e-05	5.84316e-05	0.000158463		2.71459e-06	1.29107e-06	2.75117e-06	2.25228e-06		70.3566
NM_009459	164	86	149	145	126.667		131	339	488	319.333				0.52439	0.908537	0.884146			0.79878	2.06707	2.97561					0.000245271	6.63844e-05	5.19261e-05	0.000121194		1.00894e-06	2.18385e-06	1.97545e-06	1.72275e-06		70.3493
NM_001253716	172	58	196	159	137.667		136	201	510	282.333				0.337209	1.13953	0.924419			0.790698	1.1686	2.96512					0.000157722	8.32628e-05	5.42913e-05	9.84253e-05		9.98729e-07	1.23462e-06	1.96848e-06	1.40061e-06		70.2731
NM_029271	168	174	272	154	200		367	471	918	585.333				1.03571	1.61905	0.916667			2.18452	2.80357	5.46429					0.000484431	0.0001183	5.38361e-05	0.000218856		2.75927e-06	2.96196e-06	3.62764e-06	3.11629e-06		70.2296
NM_144525	668	432	580	358	456.667		866	1374	1860	1366.67				0.646707	0.868263	0.535928			1.29641	2.05689	2.78443					0.000302482	6.34417e-05	3.14752e-05	0.000132466		1.63749e-06	2.17309e-06	1.84853e-06	1.88637e-06		70.2229
NM_013545	576	2337	1988	1493	1939.33		5934	3994	10803	6910.33				4.05729	3.45139	2.59201			10.3021	6.93403	18.7552					0.0018977	0.000252184	0.00015223	0.000767373		1.30125e-05	7.32576e-06	1.24512e-05	1.09298e-05		70.2089
NM_144830	242	1983	2649	2000	2210.67		4666	5038	9677	6460.33				8.19421	10.9463	8.26446			19.281	20.8182	39.9876					0.00383265	0.000799816	0.000485374	0.00170595		2.43538e-05	2.19943e-05	2.6547e-05	2.42984e-05		70.2084
NM_026835	228	1780	2236	994	1670		5079	5020	4975	5024.67				7.80702	9.80702	4.35965			22.2763	22.0175	21.8202					0.00365155	0.000716573	0.000256043	0.00154139		2.81372e-05	2.32614e-05	1.4486e-05	2.19615e-05		70.1859
NM_024471	354	100	136	128	121.333		176	319	536	343.667				0.282486	0.384181	0.361582			0.497175	0.90113	1.51412					0.000132126	2.80711e-05	2.12358e-05	6.04777e-05		6.27981e-07	9.52038e-07	1.0052e-06	8.61739e-07		70.181
NM_019499	186	295	515	413	407.667		403	912	2075	1130				1.58602	2.76882	2.22043			2.16667	4.90323	11.1559					0.000741825	0.00020231	0.000130406	0.00035818		2.73671e-06	5.18023e-06	7.4062e-06	5.10771e-06		70.1254
NM_010941	343	223	278	172	224.333		361	727	1052	713.333				0.650146	0.810496	0.501458			1.05248	2.11953	3.06706					0.000304091	5.92208e-05	2.94507e-05	0.000130921		1.32938e-06	2.23927e-06	2.03616e-06	1.86827e-06		70.0758
NM_023215	205	135	162	136	144.333		317	322	668	435.667				0.658537	0.790244	0.663415			1.54634	1.57073	3.25854					0.000308015	5.7741e-05	3.89625e-05	0.000134906		1.95318e-06	1.65947e-06	2.16328e-06	1.92531e-06		70.0699
NM_145455	185	2045	3077	1796	2306		4521	4498	11922	6980.33				11.0541	16.6324	9.70811			24.4378	24.3135	64.4432					0.00517028	0.00121529	0.00057016	0.00231858		3.08674e-05	2.56871e-05	4.27826e-05	3.31124e-05		70.0214
NM_019663	632	452	743	600	598.333		710	1442	2830	1660.67				0.71519	1.17563	0.949367			1.12342	2.28165	4.47785					0.000334514	8.59004e-05	5.57566e-05	0.000158723		1.41899e-06	2.41054e-06	2.97276e-06	2.26743e-06		70.0015
NM_026943	99	310	591	431	444		973	686	1651	1103.33				3.13131	5.9697	4.35354			9.82828	6.92929	16.6768					0.0014646	0.00043619	0.000255684	0.000718824		1.24141e-05	7.32076e-06	1.10714e-05	1.02687e-05		70.0012
NM_027256	945	473	585	413	490.333		766	1335	2621	1574				0.500529	0.619048	0.437037			0.810582	1.4127	2.77354					0.000234111	4.52322e-05	2.56673e-05	0.00010167		1.02384e-06	1.49251e-06	1.8413e-06	1.45255e-06		69.9941
NM_201642	512	1950	1838	1502	1763.33		3636	5214	9210	6020				3.80859	3.58984	2.93359			7.10156	10.1836	17.9883					0.00178138	0.0002623	0.000172291	0.000738658		8.96997e-06	1.07589e-05	1.19421e-05	1.0557e-05		69.9686
NM_007594	296	708	1030	621	786.333		1418	1350	4698	2488.67				2.39189	3.47973	2.09797			4.79054	4.56081	15.8716					0.00111875	0.000254255	0.000123214	0.00049874		6.05092e-06	4.81847e-06	1.05369e-05	7.13542e-06		69.8964
NM_024229	385	94	120	111	108.333		176	201	623	333.333				0.244156	0.311688	0.288312			0.457143	0.522078	1.61818					0.000114198	2.27742e-05	1.69326e-05	5.13017e-05		5.77416e-07	5.51572e-07	1.07428e-06	7.34423e-07		69.8531
NM_026455	93	151	150	97	132.667		242	309	930	493.667				1.62366	1.6129	1.04301			2.60215	3.32258	10					0.000759427	0.000117851	6.12563e-05	0.000312845		3.28677e-06	3.51029e-06	6.63881e-06	4.47862e-06		69.8529
NM_023119	415	11115	18133	12754	14000.7		25100	28404	63922	39142				26.7831	43.694	30.7325			60.4819	68.4434	154.029					0.0125272	0.0031926	0.00180493	0.00584157		7.63946e-05	7.231e-05	0.000102257	8.36538e-05		69.8303
NM_009737	374	230	331	214	258.333		512	591	1200	767.667				0.614973	0.885027	0.572193			1.36898	1.58021	3.20856					0.00028764	6.46666e-05	3.3605e-05	0.000128637		1.72916e-06	1.66949e-06	2.1301e-06	1.84292e-06		69.8008
NM_015729	642	527	829	591	649		907	1658	3012	1859				0.820872	1.29128	0.920561			1.41277	2.58255	4.69159					0.000383944	9.43502e-05	5.40648e-05	0.000177453		1.78447e-06	2.72845e-06	3.11466e-06	2.54253e-06		69.794
NM_033074	703	755	723	557	678.333		1264	1863	4104	2410.33				1.07397	1.02845	0.792319			1.79801	2.65007	5.83784					0.000502324	7.51461e-05	4.65331e-05	0.000208001		2.27106e-06	2.79978e-06	3.87563e-06	2.98216e-06		69.7485
NM_001170332	219	394	904	352	550		968	1241	2042	1417				1.79909	4.12785	1.60731			4.42009	5.66667	9.3242					0.000841481	0.000301611	9.43975e-05	0.000412497		5.58301e-06	5.9868e-06	6.19016e-06	5.91999e-06		69.6786
NM_011999	219	394	904	352	550		968	1241	2042	1417				1.79909	4.12785	1.60731			4.42009	5.66667	9.3242					0.000841481	0.000301611	9.43975e-05	0.000412497		5.58301e-06	5.9868e-06	6.19016e-06	5.91999e-06		69.6786
NM_011692	177	369	394	301	354.667		369	1040	2379	1262.67				2.08475	2.22599	1.70056			2.08475	5.87571	13.4407					0.000975092	0.000162647	9.98746e-05	0.000412538		2.63324e-06	6.20765e-06	8.92301e-06	5.9213e-06		69.6701
NM_010730	327	13057	14806	12224	13362.3		18578	28915	89600	45697.7				39.9297	45.2783	37.3823			56.8135	88.4251	274.006					0.0186762	0.00330837	0.00219547	0.00806		7.1761e-05	9.34206e-05	0.000181907	0.000115696		69.6652
NM_025321	150	599	1208	1169	992		991	2137	4165	2431				3.99333	8.05333	7.79333			6.60667	14.2467	27.7667					0.00186779	0.000588436	0.000457704	0.00097131		8.34487e-06	1.50515e-05	1.84338e-05	1.39434e-05		69.661
NM_001038654	451	884	1837	1035	1252		2922	2671	3351	2981.33				1.96009	4.07317	2.2949			6.47894	5.92239	7.43016					0.000916786	0.000297616	0.00013478	0.000449727		8.18353e-06	6.25697e-06	4.93274e-06	6.45775e-06		69.6415
NM_001038653	451	884	1837	1035	1252		2922	2671	3351	2981.33				1.96009	4.07317	2.2949			6.47894	5.92239	7.43016					0.000916786	0.000297616	0.00013478	0.000449727		8.18353e-06	6.25697e-06	4.93274e-06	6.45775e-06		69.6415
NM_030696	451	884	1837	1035	1252		2922	2671	3351	2981.33				1.96009	4.07317	2.2949			6.47894	5.92239	7.43016					0.000916786	0.000297616	0.00013478	0.000449727		8.18353e-06	6.25697e-06	4.93274e-06	6.45775e-06		69.6415
NM_010566	1172	2984	3769	2691	3148		6118	7531	15957	9868.67				2.54608	3.21587	2.29608			5.22014	6.42577	13.6152					0.00119087	0.000234975	0.000134849	0.000520231		6.59355e-06	6.78878e-06	9.03886e-06	7.47373e-06		69.6079
NM_144958	387	10066	13693	9590	11116.3		23128	23209	54787	33708				26.0103	35.3824	24.7804			59.7623	59.9716	141.568					0.0121657	0.0025853	0.00145536	0.00540213		7.54856e-05	6.33596e-05	9.39846e-05	7.761e-05		69.6062
NM_009387	214	442	768	884	698		678	1156	3685	1839.67				2.06542	3.58879	4.13084			3.16822	5.40187	17.2196					0.000966053	0.000262223	0.000242605	0.000490294		4.00178e-06	5.70704e-06	1.14318e-05	7.04687e-06		69.5761
NM_027349	819	382	555	379	438.667		831	1076	1936	1281				0.466422	0.677656	0.462759			1.01465	1.3138	2.36386					0.000218158	4.95145e-05	2.7178e-05	9.82836e-05		1.28161e-06	1.38802e-06	1.56932e-06	1.41298e-06		69.5576
NM_013499	421	997	1138	812	982.333		1137	3141	5782	3353.33				2.36817	2.70309	1.92874			2.70071	7.46081	13.734					0.00110766	0.000197508	0.000113275	0.000472813		3.41127e-06	7.8823e-06	9.11772e-06	6.80376e-06		69.4929
NM_001015876	702	170	231	164	188.333		406	436	832	558				0.242165	0.32906	0.233618			0.578348	0.621083	1.18519					0.000113267	2.40435e-05	1.37205e-05	5.03437e-05		7.3051e-07	6.5617e-07	7.86822e-07	7.24501e-07		69.4875
NM_013511	969	1275	1427	1176	1292.67		2737	3234	6360	4110.33				1.31579	1.47265	1.21362			2.82456	3.33746	6.56347					0.00061543	0.000107603	7.12763e-05	0.00026477		3.5677e-06	3.52601e-06	4.35736e-06	3.81702e-06		69.3655
NM_001199265	969	1275	1427	1176	1292.67		2737	3234	6360	4110.33				1.31579	1.47265	1.21362			2.82456	3.33746	6.56347					0.00061543	0.000107603	7.12763e-05	0.00026477		3.5677e-06	3.52601e-06	4.35736e-06	3.81702e-06		69.3655
NM_172121	931	120	117	124	120.333		196	331	663	396.667				0.128894	0.125671	0.13319			0.210526	0.355532	0.712137					6.0287e-05	9.18247e-06	7.82229e-06	2.57639e-05		2.65915e-07	3.75617e-07	4.72775e-07	3.71436e-07		69.3631
NM_148929	557	166	213	135	171.333		353	453	804	536.667				0.298025	0.382406	0.24237			0.633752	0.813285	1.44345					0.000139394	2.79414e-05	1.42344e-05	6.05234e-05		8.00491e-07	8.59231e-07	9.58277e-07	8.72667e-07		69.3545
NM_025383	247	618	855	632	701.667		1133	1563	3805	2167				2.50202	3.46154	2.5587			4.58704	6.32794	15.4049					0.00117026	0.000252926	0.000150273	0.000524488		5.79389e-06	6.68542e-06	1.0227e-05	7.56877e-06		69.2963
NM_001177843	1001	77	145	94	105.333		243	228	308	259.667				0.0769231	0.144855	0.0939061			0.242757	0.227772	0.307692					3.5979e-05	1.05842e-05	5.51513e-06	1.73594e-05		3.06626e-07	2.4064e-07	2.04271e-07	2.50512e-07		69.2957
NM_011042	330	1561	2233	1515	1769.67		3118	4927	7592	5212.33				4.7303	6.76667	4.59091			9.44848	14.9303	23.0061					0.00221249	0.000494423	0.000269625	0.000992179		1.19344e-05	1.57738e-05	1.52733e-05	1.43271e-05		69.2517
NM_027297	502	177	160	124	153.667		217	470	1054	580.333				0.35259	0.318725	0.247012			0.432271	0.936255	2.0996					0.000164916	2.32884e-05	1.45071e-05	6.75704e-05		5.46001e-07	9.89148e-07	1.39389e-06	9.76345e-07		69.2075
NM_148932	1181	92	163	130	128.333		241	216	560	339				0.0779001	0.138019	0.110076			0.204064	0.182896	0.474174					3.6436e-05	1.00847e-05	6.4648e-06	1.76618e-05		2.57753e-07	1.93228e-07	3.14795e-07	2.55259e-07		69.1917
NM_001077705	578	2337	1988	1496	1940.33		5977	4057	11044	7026				4.04325	3.43945	2.58824			10.3408	7.01903	19.1073					0.00189114	0.000251311	0.000152008	0.000764819		1.30615e-05	7.41556e-06	1.2685e-05	1.1054e-05		69.1893
NM_007871	847	882	1595	1034	1170.33		1866	3025	4478	3123				1.04132	1.88312	1.22078			2.20307	3.57143	5.28689					0.000487054	0.000137594	7.16967e-05	0.000232115		2.78269e-06	3.77319e-06	3.50987e-06	3.35525e-06		69.1797
NM_011185	221	1482	1979	1536	1665.67		2128	4430	9108	5222				6.70588	8.95475	6.95023			9.62896	20.0452	41.2127					0.00313652	0.0006543	0.000408189	0.00139967		1.21623e-05	2.11777e-05	2.73603e-05	2.02334e-05		69.1761
NM_020270	216	121	129	66	105.333		339	254	473	355.333				0.560185	0.597222	0.305556			1.56944	1.17593	2.18981					0.000262014	4.36375e-05	1.79454e-05	0.000107865		1.98236e-06	1.24236e-06	1.45378e-06	1.5595e-06		69.1667
NM_027541	664	275	276	244	265		419	766	1537	907.333				0.414157	0.415663	0.36747			0.631024	1.15361	2.31476					0.000193712	3.03714e-05	2.15816e-05	8.18884e-05		7.97045e-07	1.21879e-06	1.53672e-06	1.18419e-06		69.1516
NM_008509	455	21372	47504	51635	40170.3		32136	82575	167318	94009.7				46.9714	104.404	113.484			70.6286	181.484	367.732					0.0219698	0.00762855	0.00666492	0.0120878		8.92108e-05	0.000191736	0.00024413	0.000175026		69.0627
NM_026220	420	462	615	486	521		859	1041	3026	1642				1.1	1.46429	1.15714			2.04524	2.47857	7.20476					0.0005145	0.000106992	6.79593e-05	0.000229817		2.58334e-06	2.6186e-06	4.7831e-06	3.32835e-06		69.0483
NM_001081975	420	462	615	486	521		859	1041	3026	1642				1.1	1.46429	1.15714			2.04524	2.47857	7.20476					0.0005145	0.000106992	6.79593e-05	0.000229817		2.58334e-06	2.6186e-06	4.7831e-06	3.32835e-06		69.0483
NM_030112	696	206	224	170	200		411	533	1047	663.667				0.295977	0.321839	0.244253			0.590517	0.765805	1.50431					0.000138436	2.35159e-05	1.4345e-05	5.87658e-05		7.45881e-07	8.09068e-07	9.98683e-07	8.51211e-07		69.0379
NM_001025309	688	464	616	481	520.333		1053	1258	2333	1548				0.674419	0.895349	0.699128			1.53052	1.82849	3.39099					0.000315444	6.54208e-05	4.106e-05	0.000140641		1.9332e-06	1.93179e-06	2.25121e-06	2.03873e-06		68.9847
NM_027353	323	185	204	168	185.667		441	398	964	601				0.572755	0.631579	0.520124			1.36533	1.2322	2.98452					0.000267893	4.61478e-05	3.0547e-05	0.000114863		1.72454e-06	1.30181e-06	1.98137e-06	1.66924e-06		68.8114
NM_010185	67	6529	5453	3966	5316		9916	15328	37437	20893.7				97.4478	81.3881	59.194			148	228.776	558.761					0.0455789	0.00594681	0.00347648	0.0183341		0.000186939	0.000241701	0.000370951	0.00026653		68.788
NM_028076	300	142	212	174	176		289	395	839	507.667				0.473333	0.706667	0.58			0.963333	1.31667	2.79667					0.000221391	5.16343e-05	3.40635e-05	0.000102363		1.21678e-06	1.39105e-06	1.85665e-06	1.48816e-06		68.7847
NM_027514	389	220	175	189	194.667		359	547	1223	709.667				0.565553	0.449871	0.485861			0.922879	1.40617	3.14396					0.000264524	3.28709e-05	2.85347e-05	0.000108643		1.16569e-06	1.48561e-06	2.08721e-06	1.5795e-06		68.7832
NM_001081188	272	82	146	149	125.667		237	178	531	315.333				0.301471	0.536765	0.547794			0.871324	0.654412	1.95221					0.000141006	3.922e-05	3.21721e-05	7.07993e-05		1.10057e-06	6.91382e-07	1.29603e-06	1.02933e-06		68.7821
NM_026396	334	480	445	333	419.333		1467	1012	1656	1378.33				1.43713	1.33234	0.997006			4.39222	3.02994	4.95808					0.000672182	9.73502e-05	5.85544e-05	0.000276029		5.5478e-06	3.20111e-06	3.29158e-06	4.0135e-06		68.7752
NM_001177756	524	108	240	142	163.333		287	406	481	391.333				0.206107	0.458015	0.270992			0.54771	0.774809	0.917939					9.64017e-05	3.3466e-05	1.59154e-05	4.85944e-05		6.91811e-07	8.18581e-07	6.09402e-07	7.06598e-07		68.7723
NM_001177753	536	108	240	142	163.333		287	406	481	391.333				0.201493	0.447761	0.264925			0.535448	0.757463	0.897388					9.42435e-05	3.27167e-05	1.55591e-05	4.75064e-05		6.76323e-07	8.00255e-07	5.95759e-07	6.90779e-07		68.7723
NM_146200	892	2776	3658	2449	2961		6286	7345	13801	9144				3.11211	4.1009	2.74552			7.04709	8.2343	15.472					0.00145562	0.000299642	0.000161245	0.000638834		8.90116e-06	8.69949e-06	1.02715e-05	9.29073e-06		68.7604
NM_001177792	202	457	598	334	463		1129	991	2345	1488.33				2.26238	2.9604	1.65347			5.58911	4.90594	11.6089					0.00105817	0.000216308	9.71084e-05	0.000457197		7.05959e-06	5.1831e-06	7.70694e-06	6.64988e-06		68.7527
NM_001103165	343	1621	2347	1583	1850.33		3302	5092	8024	5472.67				4.72595	6.84257	4.61516			9.62682	14.8455	23.3936					0.00221045	0.000499968	0.00027105	0.000993823		1.21596e-05	1.56842e-05	1.55306e-05	1.44581e-05		68.7381
[truncated: 6,476 more rows]
[truncated: 3 more columns]

## Sheet: flaA
		Raw Read Counts Ribosome Reads											Raw Read Counts mRNA Reads													Read Density Ribosome Reads											Read Density mRNA Reads
[truncated: 7,353 more rows]
[truncated: 21 more columns]

## Sheet: dotflaA
		Raw Read Counts Ribosome Reads											Raw Read Counts mRNA Reads													Read Density Ribosome Reads													Read Density mRNA Reads
[truncated: 8,951 more rows]
[truncated: 21 more columns]

[truncated: 1 more sheets: 7flaA]
