# Supplementary material for: Global analysis of gene expression reveals mRNA superinduction is required for the inducible immune response to a bacterial pathogen
Source: eLife journal article supplement (doi:10.7554/elife.22707), 2017-04-06
Supplement: supp [file elife-22707-supp-v1.zip › elife_poa_e22707_Figure_7_Source_Data.xlsx]

## Sheet: Gene Groups Overview
	Uninfected BMMs			Raw Ribosome Footprint Count		log10(mito-normalized count)
	RefSeq Identifier	Entrez Gene Number	Gene Symbol	untreated	harringtonine	untreated	harringtonine	harr/un ratio
Cytokines	NM_001113530	12977	Csf1	31	15	1.80286	1.55646	0.863329
	NM_007778	12977	Csf1	31	15	1.80286	1.55646	0.863329
	NM_001113529	12977	Csf1	23	16	1.67323	1.58449	0.946967
	NM_009140	20310	Cxcl2	65	50	2.12441	2.07934	0.978784
	NM_013642	19252	Dusp1	353	74	2.85928	2.2496	0.786774
	NM_010548	16153	Il10	22	13	1.65392	1.49432	0.903497
	NM_010554	16175	Il1a	23	49	1.67323	2.07057	1.23747
	NM_008361	16176	Il1b	57	52	2.06738	2.09638	1.01403
	NM_013590	17110	Lyz1	50860	3151	5.01788	3.87882	0.773
	NM_013693	21926	Tnf	85	62	2.24092	2.17276	0.969586
Housekeeping	NM_009092	20068	Rps17	3376	287	3.8399	2.83825	0.739147
	NM_011653	22142	Tuba1a	13538	1247	4.44306	3.47624	0.782398
	NM_001252219	114641	Rpl31	3467	238	3.85146	2.75695	0.71582
	NM_008084	14433	Gapdh	35452	4037	4.86114	3.98643	0.820061
	NM_001252218	114641	Rpl31	3467	238	3.85146	2.75695	0.71582
	NM_053257	114641	Rpl31	3467	238	3.85146	2.75695	0.71582
	ΔflaA-infected BMMs			Raw Ribosome Footprint Count		log10(mito-normalized count)
	RefSeq Identifier	Entrez Gene Number	Gene Symbol	untreated	harringtonine	untreated	harringtonine	harr/un ratio
Cytokines	NM_001113530	12977	Csf1	2368	10459	3.97305	4.61236	1.16091
	NM_007778	12977	Csf1	2368	10459	3.97305	4.61236	1.16091
	NM_001113529	12977	Csf1	1885	8484	3.87398	4.52147	1.16714
	NM_009969	12981	Csf2	1490	6063	3.77185	4.37555	1.16005
	NM_008176	14825	Cxcl1	1599	6378	3.80251	4.39755	1.15648
	NM_009140	20310	Cxcl2	10446	37424	4.61762	5.16602	1.11876
	NM_013642	19252	Dusp1	1572	5276	3.79512	4.31517	1.13703
	NM_010090	13537	Dusp2	269	965	3.02842	3.57739	1.18127
	NM_010510	15977	Ifnb1	87	389	2.53819	3.18281	1.25397
	NM_010548	16153	Il10	2551	14527	4.00538	4.75504	1.18716
	NM_008352	16160	Il12b	44	106	2.24212	2.61817	1.16772
	NM_010554	16175	Il1a	9558	38754	4.57903	5.18118	1.1315
	NM_008361	16176	Il1b	20910	45747	4.91902	5.25323	1.06794
	NM_031252	83430	Il23a	93	386	2.56715	3.17945	1.23852
	NM_031168	16193	Il6	262	609	3.01697	3.37748	1.1195
	NM_013590	17110	Lyz1	28324	22218	5.05082	4.93957	0.977974
	NM_013693	21926	Tnf	9601	32260	4.58098	5.10153	1.11363
Housekeeping	NM_009092	20068	Rps17	2785	3571	4.04349	4.14565	1.02527
	NM_011653	22142	Tuba1a	8065	7097	4.50527	4.44394	0.986387
	NM_001252219	114641	Rpl31	3002	3730	4.07608	4.16457	1.02171
	NM_008084	14433	Gapdh	24814	11523	4.99336	4.65443	0.932123
	NM_001252218	114641	Rpl31	3002	3730	4.07608	4.16457	1.02171
	NM_053257	114641	Rpl31	3002	3730	4.07608	4.16457	1.02171
	ΔdotAΔflaA-infected BMMs			Raw Ribosome Footprint Count		log10(mito-normalized count)
	RefSeq Identifier	Entrez Gene Number	Gene Symbol	untreated	harringtonine	untreated	harringtonine	harr/un ratio
Cytokines	NM_001113530	12977	Csf1	103	158	2.30219	2.19866	0.955028
	NM_007778	12977	Csf1	103	158	2.30219	2.19866	0.955028
	NM_001113529	12977	Csf1	87	130	2.22887	2.11394	0.948435
	NM_009969	12981	Csf2	36	52	1.84566	1.716	0.929752
	NM_008176	14825	Cxcl1	73	69	2.15268	1.83885	0.854215
	NM_009140	20310	Cxcl2	1202	829	3.36926	2.91855	0.86623
	NM_013642	19252	Dusp1	587	401	3.05799	2.60314	0.851259
	NM_010090	13537	Dusp2	109	40	2.32678	1.60206	0.68853
	NM_010548	16153	Il10	122	136	2.37572	2.13354	0.898062
	NM_008352	16160	Il12b	207	70	2.60533	1.8451	0.708202
	NM_010554	16175	Il1a	593	585	3.06241	2.76716	0.903588
	NM_008361	16176	Il1b	3351	1358	3.81453	3.1329	0.821307
	NM_031168	16193	Il6	73	41	2.15268	1.61278	0.749199
	NM_013590	17110	Lyz1	40987	8974	4.902	3.95299	0.806402
	NM_013693	21926	Tnf	1135	760	3.34435	2.88081	0.861397
Housekeeping	NM_009092	20068	Rps17	3887	1303	3.87897	3.11494	0.803034
	NM_011653	22142	Tuba1a	10194	3392	4.2977	3.53046	0.821476
	NM_001252219	114641	Rpl31	4300	1203	3.92282	3.08027	0.785216
	NM_008084	14433	Gapdh	36278	13006	4.849	4.11414	0.848452
	NM_001252218	114641	Rpl31	4300	1203	3.92282	3.08027	0.785216
	NM_053257	114641	Rpl31	4300	1203	3.92282	3.08027	0.785216
	Δ7ΔflaA-infected BMMs			Raw Ribosome Footprint Count		log10(mito-normalized count)
	RefSeq Identifier	Entrez Gene Number	Gene Symbol	untreated	harringtonine	untreated	harringtonine	harr/un ratio
Cytokines	NM_001113530	12977	Csf1	889	167	3.37158	2.90245	0.860857
	NM_007778	12977	Csf1	889	167	3.37158	2.90245	0.860857
	NM_001113529	12977	Csf1	738	139	3.29073	2.82275	0.857787
	NM_009969	12981	Csf2	13	22	1.53662	2.02215	1.31598
	NM_008176	14825	Cxcl1	248	127	2.81713	2.78354	0.988076
	NM_009140	20310	Cxcl2	3740	1226	3.99555	3.76822	0.943105
	NM_013642	19252	Dusp1	1507	360	3.60079	3.23603	0.898701
	NM_010090	13537	Dusp2	152	50	2.60452	2.3787	0.913298
	NM_010510	15977	Ifnb1	66	5	2.24222	1.3787	0.614882
	NM_010548	16153	Il10	115	36	2.48337	2.23603	0.900402
	NM_008352	16160	Il12b	216	62	2.75713	2.47212	0.896629
	NM_010554	16175	Il1a	4266	1489	4.0527	3.85263	0.950633
	NM_008361	16176	Il1b	11229	3956	4.47302	4.27699	0.956175
	NM_031168	16193	Il6	1116	406	3.47034	3.28826	0.947532
	NM_013590	17110	Lyz1	24797	3919	4.81708	4.27291	0.887033
	NM_013693	21926	Tnf	3265	1331	3.93656	3.80391	0.966303
Housekeeping	NM_008084	14433	Gapdh	17366	4385	4.66238	4.3217	0.926931
	NM_001252219	114641	Rpl31	5136	612	4.1333	3.46648	0.838672
	NM_001252218	114641	Rpl31	5136	612	4.1333	3.46648	0.838672
	NM_053257	114641	Rpl31	5136	612	4.1333	3.46648	0.838672
	NM_009092	20068	Rps17	5241	632	4.14209	3.48045	0.840264
	NM_011653	22142	Tuba1a	7171	1460	4.27826	3.84409	0.898517

## Sheet: analyze-runoff-data-uninf.csv
	uninf.untr	uninf.harr	EG	Symbol	untrNormLog10	harrNormLog10	isCytokine-related	isHousekeeping
NM_007652	94	5	12509	Cd59a	2.28463	1.07934	FALSE	FALSE
NM_020567	543	60	57441	Gmnn	3.0463	2.15852	FALSE	FALSE
NM_001159617	37	29	56176	Pigp	1.8797	1.84277	FALSE	FALSE
NM_001037812	87	11	381259	Tmem237	2.25102	1.42177	FALSE	FALSE
NM_144838	19	3	218544	Sgtb	1.59026	1	FALSE	FALSE
NM_022882	64	16	64898	Lpin2	2.11768	1.58449	FALSE	FALSE
NM_001198823	2974	476	11820	App	3.78484	3.05798	FALSE	FALSE
NM_001163432	76	33	12748	Clk2	2.19232	1.89889	FALSE	FALSE
NM_001080968	161	38	99412	Golga2	2.51833	1.96016	FALSE	FALSE
NM_153063	39	20	224691	Zfp472	1.90257	1.6814	FALSE	FALSE
NM_019798	28	11	18577	Pde4a	1.75866	1.42177	FALSE	FALSE
NM_011509	219	24	100041294	Gm3258	2.65195	1.76058	FALSE	FALSE
NM_001001981	41	8	195434	Utp14b	1.92429	1.28346	FALSE	FALSE
NM_145222	22	7	227327	B3gnt7	1.65392	1.22547	FALSE	FALSE
NM_001040111	114	25	69710	Arap1	2.36841	1.77831	FALSE	FALSE
NM_133186	215	26	68428	Steap3	2.64394	1.79535	FALSE	FALSE
NM_010234	1154	190	14281	Fos	3.37371	2.65913	FALSE	FALSE
NM_172541	151	70	215210	Tmem120a	2.49048	2.22547	FALSE	FALSE
NM_024448	117	23	19328	Rab12	2.37969	1.7421	FALSE	FALSE
NM_021366	116	11	50794	Klf13	2.37596	1.42177	FALSE	FALSE
NM_001136070	36	3	16865	Eif2d	1.8678	1	FALSE	FALSE
NM_019703	432	59	56421	Pfkp	2.94699	2.15122	FALSE	FALSE
NM_026217	208	17	67526	Atg12	2.62956	1.61082	FALSE	FALSE
NM_001029842	113	15	104681	Slc16a6	2.36458	1.55646	FALSE	FALSE
NM_001168297	53	15	71865	Fbxo30	2.03578	1.55646	FALSE	FALSE
NM_001040397	5	38	78749	Filip1l	1.01047	1.96016	FALSE	FALSE
NM_007421	1050	153	11565	Adssl1	3.33269	2.56506	FALSE	FALSE
NM_173748	157	21	209586	Nudcd3	2.5074	1.70259	FALSE	FALSE
NM_201393	726	125	18810	Plec	3.17244	2.47728	FALSE	FALSE
NM_008402	1160	293	16410	Itgav	3.37596	2.84724	FALSE	FALSE
NM_033596	2799	244	97122	Hist2h4	3.7585	2.76776	FALSE	FALSE
NM_001008542	190	30	17859	Mxi1	2.59026	1.85749	FALSE	FALSE
NM_011291	5112	434	19989	Rpl7	4.02009	3.01786	FALSE	FALSE
NM_001033962	211	24	22215	Ube3a	2.63578	1.76058	FALSE	FALSE
NM_011400	1146	95	20525	Slc2a1	3.37069	2.3581	FALSE	FALSE
NM_027203	58	7	69757	Leng1	2.07493	1.22547	FALSE	FALSE
NM_001166457	319	33	210766	Brcc3	2.81529	1.89889	FALSE	FALSE
NM_001161845	343	41	20393	Sgk1	2.8468	1.99316	FALSE	FALSE
NM_007807	1858	268	13058	Cybb	3.58055	2.80851	FALSE	FALSE
NM_001170537	650	89	17260	Mef2c	3.12441	2.32976	FALSE	FALSE
NM_001163487	48	3	18642	Pfkm	1.99274	1	FALSE	FALSE
NM_001083334	740	146	30948	Bin1	3.18073	2.54473	FALSE	FALSE
NM_001205082	145	38	20778	Scarb1	2.47287	1.96016	FALSE	FALSE
NM_001025594	26	4	71834	Zbtb43	1.72647	1	FALSE	FALSE
NM_025951	28	2	67073	Pi4k2b	1.75866	1	FALSE	FALSE
NM_008385	52	6	16330	Inpp5b	2.0275	1.15852	FALSE	FALSE
NM_001102613	19	1	232970	Phldb3	1.59026	1	FALSE	FALSE
NM_001081013	28	8	109263	Rlf	1.75866	1.28346	FALSE	FALSE
NM_029447	138	29	75805	Nln	2.45138	1.84277	FALSE	FALSE
NM_026626	11	0	68226	Efcab2	1.35289	1	FALSE	FALSE
NM_001256132	157	27	93790	Nipa2	2.5074	1.81174	FALSE	FALSE
NM_009001	18	2	19339	Rab3a	1.56677	1	FALSE	FALSE
NM_028523	8	12	73379	Dcbld2	1.21459	1.45955	FALSE	FALSE
NM_026176	433	27	67466	Pdcl	2.94799	1.81174	FALSE	FALSE
NM_025555	29	6	66421	2410004B18Rik	1.7739	1.15852	FALSE	FALSE
NM_016874	15	6	54006	Deaf1	1.48759	1.15852	FALSE	FALSE
NM_010119	999	138	13660	Ehd1	3.31107	2.52025	FALSE	FALSE
NM_001083958	18	2	72611	Zfp655	1.56677	1	FALSE	FALSE
NM_001141977	416	60	72119	Tpx2	2.93059	2.15852	FALSE	FALSE
NM_172606	448	38	223455	2016-03-06	2.96278	1.96016	FALSE	FALSE
NM_026042	215	29	67224	Med29	2.64394	1.84277	FALSE	FALSE
NM_019567	150	90	56215	Acin1	2.48759	2.33461	FALSE	FALSE
NM_009777	11059	1674	12260	C1qb	4.35522	3.60413	FALSE	FALSE
NM_031868	1504	302	19045	Ppp1ca	3.48875	2.86038	FALSE	FALSE
NM_007573	660	60	12261	C1qbp	3.13105	2.15852	FALSE	FALSE
NM_001033449	82	12	381259	Tmem237	2.22532	1.45955	FALSE	FALSE
NM_177568	28	7	18796	Plcb2	1.75866	1.22547	FALSE	FALSE
NM_053187	144	46	94221	Gopc	2.46986	2.04313	FALSE	FALSE
NM_001034097	86	45	619441	Tnfsf12Tnfsf13	2.246	2.03358	FALSE	FALSE
NM_025520	130	13	66373	Lsm5	2.42544	1.49432	FALSE	FALSE
NM_175306	41	13	100169	Phactr4	1.92429	1.49432	FALSE	FALSE
NM_001171035	5058	407	110213	Tmbim6	4.01548	2.98997	FALSE	FALSE
NM_199476	59	9	382985	Rrm2b	2.08235	1.33461	FALSE	FALSE
NM_172259	242	19	216459	Myl6b	2.69532	1.65913	FALSE	FALSE
NM_134033	76	27	104479	Ccdc117	2.19232	1.81174	FALSE	FALSE
NM_001122596	83	4	213438	A630033H20Rik	2.23058	1	FALSE	FALSE
NM_028835	207	27	74244	Atg7	2.62747	1.81174	FALSE	FALSE
NM_001113354	64	10	320595	Phf8	2.11768	1.38037	FALSE	FALSE
NM_013859	34	8	29805	Znhit2	1.84298	1.28346	FALSE	FALSE
NM_153544	32	4	217216	BC030867	1.81665	1	FALSE	FALSE
NM_177366	21	1	269604	Gpr157	1.63372	1	FALSE	FALSE
NM_025836	550	69	66905	Plin3	3.05186	2.21922	FALSE	FALSE
NM_007999	533	55	14156	Fen1	3.03823	2.12074	FALSE	FALSE
NM_001145821	411	33	14594	Ggta1	2.92534	1.89889	FALSE	FALSE
NM_001253702	68	19	229681	St7l	2.14401	1.65913	FALSE	FALSE
NM_138749	263	34	140570	Plxnb2	2.73146	1.91185	FALSE	FALSE
NM_001172104	17	2	109929	Zbtb25	1.54195	1	FALSE	FALSE
NM_139197	11	2	227671	Gbgt1	1.35289	1	FALSE	FALSE
NM_080554	234	30	66998	Psmd5	2.68072	1.85749	FALSE	FALSE
NM_145529	134	21	228410	Cstf3	2.43861	1.70259	FALSE	FALSE
NM_030690	58	8	75646	Rai14	2.07493	1.28346	FALSE	FALSE
NM_133667	25	4	18604	Pdk2	1.70944	1	FALSE	FALSE
NM_009395	175	34	21927	Tnfaip1	2.55454	1.91185	FALSE	FALSE
NM_177472	14	0	52864	Slx4	1.45763	1	FALSE	FALSE
NM_026378	18	10	67789	Dalrd3	1.56677	1.38037	FALSE	FALSE
NM_018825	28	5	23921	Sh2b2	1.75866	1.07934	FALSE	FALSE
NM_033444	8296	617	114584	Clic1	4.23037	3.17066	FALSE	FALSE
NM_001042513	459	69	50493	Txnrd1	2.97331	2.21922	FALSE	FALSE
NM_175445	452	53	215653	Rassf2	2.96664	2.10465	FALSE	FALSE
NM_028840	152	19	74252	Armc1	2.49335	1.65913	FALSE	FALSE
NM_008583	49	15	17283	Men1	2.0017	1.55646	FALSE	FALSE
NM_021887	211	31	60504	Il21r	2.63578	1.87173	FALSE	FALSE
NM_029645	49	9	384281	Gatc	2.0017	1.33461	FALSE	FALSE
NM_019772	624	72	56372	1110004F10Rik	3.10669	2.2377	FALSE	FALSE
NM_011523	61	19	20975	Synj2	2.09683	1.65913	FALSE	FALSE
NM_178279	204	50	218699	Pxk	2.62113	2.07934	FALSE	FALSE
NM_001142697	35	22	66648	Tpgs2	1.85557	1.7228	FALSE	FALSE
NM_133850	147	26	99311	Commd7	2.47882	1.79535	FALSE	FALSE
NM_023117	95	28	12531	Cdc25b	2.28923	1.82753	FALSE	FALSE
NM_010911	81	18	18041	Nfs1	2.21999	1.63564	FALSE	FALSE
NM_198831	254	50	52443	Mrpl48	2.71634	2.07934	FALSE	FALSE
NM_001033711	1823	177	14017	Evi2a	3.57229	2.62835	FALSE	FALSE
NM_001164190	126	19	17772	Mtm1	2.41187	1.65913	FALSE	FALSE
NM_028048	15	2	71998	Slc25a35	1.48759	1	FALSE	FALSE
NM_027975	63	11	71878	Fam83d	2.11084	1.42177	FALSE	FALSE
NM_001013379	61	8	234358	Zfp930	2.09683	1.28346	FALSE	FALSE
NM_001004142	66	8	195046	Nlrp1a	2.13105	1.28346	FALSE	FALSE
NM_007681	131	26	12615	Cenpa	2.42877	1.79535	FALSE	FALSE
NM_183251	20	3	66273	Aamdc	1.61253	1	FALSE	FALSE
NM_001166431	2162	294	98758	Hnrnpf	3.64636	2.84872	FALSE	FALSE
NM_001039137	248	72	56367	Scoc	2.70595	2.2377	FALSE	FALSE
NM_080446	125	16	117599	Helb	2.40841	1.58449	FALSE	FALSE
NM_028754	115	7	74098	0610037L13Rik	2.3722	1.22547	FALSE	FALSE
NM_001159965	11	0	78255	Ralgps2	1.35289	1	FALSE	FALSE
NM_007861	584	68	13382	Dld	3.07791	2.21288	FALSE	FALSE
NM_027900	35	7	71750	R3hdm2	1.85557	1.22547	FALSE	FALSE
NM_024273	53	12	76916	Timmdc1	2.03578	1.45955	FALSE	FALSE
NM_201357	135	6	380752	Tssc1	2.44184	1.15852	FALSE	FALSE
NM_133825	168	28	52392	D1Ertd622e	2.53681	1.82753	FALSE	FALSE
NM_201407	92	31	229541	Dennd4b	2.27529	1.87173	FALSE	FALSE
NM_025281	79	21	17089	Lyar	2.20913	1.70259	FALSE	FALSE
NM_177601	33	3	212090	Tmem60	1.83002	1	FALSE	FALSE
NM_130882	42	10	170716	Cyp4f13	1.93475	1.38037	FALSE	FALSE
NM_001146086	37	15	78938	Fbxo34	1.8797	1.55646	FALSE	FALSE
NM_021335	848	64	20639	Snrpb2	3.2399	2.18655	FALSE	FALSE
NM_023773	76	23	75339	Mphosph8	2.19232	1.7421	FALSE	FALSE
NM_011394	11	6	20516	Slc20a2	1.35289	1.15852	FALSE	FALSE
NM_134042	76	4	104776	Aldh6a1	2.19232	1	FALSE	FALSE
NM_001110809	38	2	66614	Gpatch4	1.89129	1	FALSE	FALSE
NM_007788	552	133	12995	Csnk2a1	3.05344	2.50422	FALSE	FALSE
NM_178891	41	6	99890	Prmt6	1.92429	1.15852	FALSE	FALSE
NM_172620	200	10	224705	Vps52	2.61253	1.38037	FALSE	FALSE
NM_198013	19	5	103841	Cuedc1	1.59026	1.07934	FALSE	FALSE
NM_152815	11	0	72635	Lins	1.35289	1	FALSE	FALSE
NM_021524	637	148	59027	Nampt	3.11564	2.55063	FALSE	FALSE
NM_183138	18	5	194388	Tet3	1.56677	1.07934	FALSE	FALSE
NM_011822	69	22	14755	Pigq	2.15035	1.7228	FALSE	FALSE
NM_027395	582	47	70350	Basp1	3.07642	2.05247	FALSE	FALSE
NM_020035	20	8	56703	Pigo	1.61253	1.28346	FALSE	FALSE
NM_009830	288	55	12448	Ccne2	2.77089	2.12074	FALSE	FALSE
NM_019501	62	8	56075	Pdss1	2.10389	1.28346	FALSE	FALSE
NM_001128082	20	3	27027	Tspan32	1.61253	1	FALSE	FALSE
NM_028233	112	17	72416	Lrpprc	2.36072	1.61082	FALSE	FALSE
NM_001040403	146	70	14252	Flot2	2.47585	2.22547	FALSE	FALSE
NM_001159525	242	14	19298	Pex19	2.69532	1.5265	FALSE	FALSE
NM_148922	28	20	17245	Mdm1	1.75866	1.6814	FALSE	FALSE
NM_007928	95	17	13728	Mark2	2.28923	1.61082	FALSE	FALSE
NM_001033463	13	14	381801	Tatdn2	1.42544	1.5265	FALSE	FALSE
NM_177582	12	4	208104	Mlxip	1.39068	1	FALSE	FALSE
NM_010807	253	49	17357	Marcksl1	2.71462	2.07057	FALSE	FALSE
NM_013770	217	33	27376	Slc25a10	2.64796	1.89889	FALSE	FALSE
NM_010546	110	21	16150	Ikbkb	2.35289	1.70259	FALSE	FALSE
NM_199018	98	19	236920	Stard8	2.30273	1.65913	FALSE	FALSE
NM_001033157	46	15	236366	5730507C01Rik	1.97426	1.55646	FALSE	FALSE
NM_001122978	18	7	26885	Casp8ap2	1.56677	1.22547	FALSE	FALSE
NM_146238	29	3	237221	Gemin8	1.7739	1	FALSE	FALSE
NM_007713	63	24	102414	Clk3	2.11084	1.76058	FALSE	FALSE
NM_025388	362	24	66155	Ufc1	2.87021	1.76058	FALSE	FALSE
NM_001039959	189	23	66395	Ahnak	2.58796	1.7421	FALSE	FALSE
NM_001253690	14	4	56218	Patz1	1.45763	1	FALSE	FALSE
NM_001165997	27	3	76857	Spopl	1.74287	1	FALSE	FALSE
NM_001142921	145	29	21416	Tcf7l2	2.47287	1.84277	FALSE	FALSE
NM_001167991	19	4	170833	Hook2	1.59026	1	FALSE	FALSE
NM_018793	43	4	54721	Tyk2	1.94497	1	FALSE	FALSE
NM_026675	49	4	68323	Nudt22	2.0017	1	FALSE	FALSE
NM_001100109	1294	233	665155	Srp54b	3.42344	2.74773	FALSE	FALSE
NM_001162989	208	29	56698	Phax	2.62956	1.84277	FALSE	FALSE
NM_029573	563	64	67834	Idh3a	3.06201	2.18655	FALSE	FALSE
NM_026125	40	2	67389	Fam132a	1.91356	1	FALSE	FALSE
NM_029814	884	59	76959	Chmp5	3.25795	2.15122	FALSE	FALSE
NM_026392	178	33	70397	Tmem70	2.56192	1.89889	FALSE	FALSE
NM_001190302	132	10	665211	Gm14326	2.43208	1.38037	FALSE	FALSE
NM_023526	27	0	69721	Nkiras1	1.74287	1	FALSE	FALSE
NM_020493	14	3	20807	Srf	1.45763	1	FALSE	FALSE
NM_025313	1078	103	66043	Atp5d	3.34412	2.39321	FALSE	FALSE
NM_001243040	372	66	100042856	Gm4070	2.88204	2.19992	FALSE	FALSE
NM_011897	55	19	24064	Spry2	2.05186	1.65913	FALSE	FALSE
NM_025443	446	40	66249	Pno1	2.96084	1.98243	FALSE	FALSE
NM_026091	88	14	67326	1700037H04Rik	2.25598	1.5265	FALSE	FALSE
NM_009845	13	4	12483	Cd22	1.42544	1	FALSE	FALSE
NM_001252491	61	40	64291	Osbpl1a	2.09683	1.98243	FALSE	FALSE
NM_001145960	3150	332	56857	Slc37a2	3.80981	2.90151	FALSE	FALSE
NM_001252200	83	34	26921	Map4k4	2.23058	1.91185	FALSE	FALSE
NM_178925	34	3	106338	Nsun3	1.84298	1	FALSE	FALSE
NM_007502	2639	333	11933	Atp1b3	3.73294	2.90282	FALSE	FALSE
NM_008194	238	23	14933	Gyk	2.68808	1.7421	FALSE	FALSE
NM_026518	78	11	68031	Rnf146	2.2036	1.42177	FALSE	FALSE
NM_145976	92	7	212937	Tifab	2.27529	1.22547	FALSE	FALSE
NM_011956	361	23	26426	Nubp2	2.86901	1.7421	FALSE	FALSE
NM_019695	13	5	56513	Pard6a	1.42544	1.07934	FALSE	FALSE
NM_008723	146	14	18150	Npm3	2.47585	1.5265	FALSE	FALSE
NM_001252550	194	25	217370	BC017643	2.5993	1.77831	FALSE	FALSE
NM_012012	20	3	26909	Exo1	1.61253	1	FALSE	FALSE
NM_010133	12	0	13798	En1	1.39068	1	FALSE	FALSE
NM_001163555	17	6	18987	Pou2f2	1.54195	1.15852	FALSE	FALSE
NM_025872	99	27	66964	Golt1b	2.30714	1.81174	FALSE	FALSE
NM_020589	33	15	68910	Zfp467	1.83002	1.55646	FALSE	FALSE
NM_173388	1320	155	215113	Slc43a2	3.43208	2.5707	FALSE	FALSE
NM_183031	678	130	321019	Gpr183	3.14273	2.49432	FALSE	FALSE
NM_172578	68	18	217653	Mis18bp1	2.14401	1.63564	FALSE	FALSE
NM_001164406	243	30	24068	Sra1	2.69711	1.85749	FALSE	FALSE
NM_172260	16	10	216543	Cep68	1.51562	1.38037	FALSE	FALSE
NM_026187	25	1	52231	Ankzf1	1.70944	1	FALSE	FALSE
NM_001252587	219	20	228880	Zmynd8	2.65195	1.6814	FALSE	FALSE
NM_026877	90	23	68938	Aspscr1	2.26574	1.7421	FALSE	FALSE
NM_007700	41	39	12675	Chuk	1.92429	1.97144	FALSE	FALSE
NM_009351	138	23	21745	Tep1	2.45138	1.7421	FALSE	FALSE
NM_207636	175	35	319448	Fndc3a	2.55454	1.92444	FALSE	FALSE
NM_025375	191	21	66138	Wbscr22	2.59253	1.70259	FALSE	FALSE
NM_178701	69	5	231549	Lrrc8d	2.15035	1.07934	FALSE	FALSE
NM_001165984	470	88	74383	Ubap2l	2.9836	2.32486	FALSE	FALSE
NM_013860	48	13	29806	Limd1	1.99274	1.49432	FALSE	FALSE
NM_001166668	26	1	269400	Rtel1	1.72647	1	FALSE	FALSE
NM_001037940	607	126	23950	Dnajb6	3.09469	2.48074	FALSE	FALSE
NM_172404	12	3	70266	Ccbl1	1.39068	1	FALSE	FALSE
NM_001145902	620	52	228359	Arhgap1	3.10389	2.09638	FALSE	FALSE
NM_026662	365	41	110639	Prps2	2.87379	1.99316	FALSE	FALSE
NM_001100116	224	32	100101807	1700047I17Rik2	2.66175	1.88552	FALSE	FALSE
NM_001130458	756	152	21452	Tcn2	3.19002	2.56222	FALSE	FALSE
NM_198109	8	11	231637	Ssh1	1.21459	1.42177	FALSE	FALSE
NM_009157	130	60	26398	Map2k4	2.42544	2.15852	FALSE	FALSE
NM_001162996	112	9	72205	Eml2	2.36072	1.33461	FALSE	FALSE
NM_019637	47	6	56291	Styx	1.9836	1.15852	FALSE	FALSE
NM_173443	80	15	70675	Vcpip1	2.21459	1.55646	FALSE	FALSE
NM_001160415	277	48	80287	Apobec3	2.75398	2.06161	FALSE	FALSE
NM_145510	72	6	98710	Rabif	2.16883	1.15852	FALSE	FALSE
NM_025591	64	7	66488	Fam136a	2.11768	1.22547	FALSE	FALSE
NM_029861	41	1	380686	Cnrip1	1.92429	1	FALSE	FALSE
NM_016706	29	2	12812	Coil	1.7739	1	FALSE	FALSE
NM_029278	137	14	75416	Nop14	2.44822	1.5265	FALSE	FALSE
NM_010155	30	18	13875	Erf	1.78862	1.63564	FALSE	FALSE
NM_025300	172	44	27395	Mrpl15	2.54703	2.02383	FALSE	FALSE
NM_175104	35	5	66306	Fam53c	1.85557	1.07934	FALSE	FALSE
NM_028369	22	2	72825	Mon1a	1.65392	1	FALSE	FALSE
NM_007483	495	68	11852	Rhob	3.00611	2.21288	FALSE	FALSE
NM_177111	29	2	320234	Ccdc66	1.7739	1	FALSE	FALSE
NM_025968	607	65	67103	Ptgr1	3.09469	2.19329	FALSE	FALSE
NM_023243	316	47	66671	Ccnh	2.81119	2.05247	FALSE	FALSE
NM_177780	17	2	68813	Dock5	1.54195	1	FALSE	FALSE
NM_011884	185	35	24018	Rngtt	2.57867	1.92444	FALSE	FALSE
NM_025450	247	19	66258	Mrps17	2.7042	1.65913	FALSE	FALSE
NM_011233	67	21	19356	Rad17	2.13758	1.70259	FALSE	FALSE
NM_007609	79	18	12363	Casp4	2.20913	1.63564	FALSE	FALSE
NM_145943	118	19	208768	Sde2	2.38338	1.65913	FALSE	FALSE
NM_019682	911	50	56455	Dynll1	3.27102	2.07934	FALSE	FALSE
NM_008248	1091	88	15254	Hint1	3.34933	2.32486	FALSE	FALSE
NM_008730	719	116	18164	Nptx1	3.16823	2.44483	FALSE	FALSE
NM_001160378	129	33	212943	Fam46a	2.42209	1.89889	FALSE	FALSE
NM_010120	400	38	13664	Eif1a	2.91356	1.96016	FALSE	FALSE
NM_001167887	30	6	225888	Suv420h1	1.78862	1.15852	FALSE	FALSE
NM_001077359	168	28	26431	Git2	2.53681	1.82753	FALSE	FALSE
NM_001029994	84	11	76014	Zc3h18	2.23578	1.42177	FALSE	FALSE
NM_020022	211	37	19718	Rfc2	2.63578	1.94857	FALSE	FALSE
NM_013815	78	36	217578	Baz1a	2.2036	1.93667	FALSE	FALSE
NM_001205231	675	125	22185	U2af2	3.14081	2.47728	FALSE	FALSE
NM_022015	62	10	63856	Taf8	2.10389	1.38037	FALSE	FALSE
NM_027382	58	7	70315	Hdac8	2.07493	1.22547	FALSE	FALSE
NM_001005866	26	3	30841	Kdm2b	1.72647	1	FALSE	FALSE
NM_178693	67	6	227683	Coq4	2.13758	1.15852	FALSE	FALSE
NM_001163704	129	18	50762	Fbxo6	2.42209	1.63564	FALSE	FALSE
NM_016896	43	23	53859	Map3k14	1.94497	1.7421	FALSE	FALSE
NM_001081321	76	31	71521	Pds5a	2.19232	1.87173	FALSE	FALSE
NM_009939	488	63	12848	Cops2	2.99992	2.17971	FALSE	FALSE
NM_153795	1285	178	108101	Fermt3	3.4204	2.63079	FALSE	FALSE
NM_001177406_dup2	112	15	NA	NA	2.36072	1.55646	FALSE	FALSE
NM_001005509	332	39	229317	Eif2a	2.83264	1.97144	FALSE	FALSE
NM_027456	22	1	78795	Armc9	1.65392	1	FALSE	FALSE
NM_001177752	160	32	170768	Pfkfb3	2.51562	1.88552	FALSE	FALSE
NM_001114085	272	34	67203	Nde1	2.74607	1.91185	FALSE	FALSE
NM_133780	159	71	108989	Tpr	2.5129	2.23163	FALSE	FALSE
NM_177263	23	2	320799	Zhx3	1.67323	1	FALSE	FALSE
NM_174998	11	1	170638	Hpcal4	1.35289	1	FALSE	FALSE
NM_001005475	33	14	245666	Iqsec2	1.83002	1.5265	FALSE	FALSE
NM_053169	31	3	94092	Trim16	1.80286	1	FALSE	FALSE
NM_001110337	12	1	70355	Gprc5c	1.39068	1	FALSE	FALSE
NM_133906	51	9	74570	Zkscan1	2.01907	1.33461	FALSE	FALSE
NM_009405	14	6	21953	Tnni2	1.45763	1.15852	FALSE	FALSE
NM_026958	469	27	380773	Slirp	2.98267	1.81174	FALSE	FALSE
NM_177429	15	3	237222	Ofd1	1.48759	1	FALSE	FALSE
NM_008033	272	62	14272	Fnta	2.74607	2.17276	FALSE	FALSE
NM_010304	187	18	14676	Gna15	2.58334	1.63564	FALSE	FALSE
NM_146065	80	17	223922	Atf7	2.21459	1.61082	FALSE	FALSE
NM_001081152	49	8	244879	Npat	2.0017	1.28346	FALSE	FALSE
NM_019480	33	4	55960	Ebag9	1.83002	1	FALSE	FALSE
NM_029788	94	24	76892	Rnft1	2.28463	1.76058	FALSE	FALSE
NM_027830	10	12	71567	Mcm9	1.3115	1.45955	FALSE	FALSE
NM_001256055	573	93	100042807	Eif3j2	3.06966	2.34886	FALSE	FALSE
NM_001162417	108	22	17876	Myef2	2.34493	1.7228	FALSE	FALSE
NM_027711	116	20	544963	Iqgap2	2.37596	1.6814	FALSE	FALSE
NM_001164352	20	5	58859	Efemp2	1.61253	1.07934	FALSE	FALSE
NM_027180	205	42	69710	Arap1	2.62326	2.00362	FALSE	FALSE
NM_016957	707	97	15331	Hmgn2	3.16092	2.36714	FALSE	FALSE
NM_001195338	74	9	100503572	Bbip1	2.18073	1.33461	FALSE	FALSE
NM_001252648	13	3	97820	4833439L19Rik	1.42544	1	FALSE	FALSE
NM_001038839	265	39	18439	P2rx7	2.73475	1.97144	FALSE	FALSE
NM_028185	36	11	72290	Lsm11	1.8678	1.42177	FALSE	FALSE
NM_008914	150	24	19056	Ppp3cb	2.48759	1.76058	FALSE	FALSE
NM_172691	20	9	230088	Fam214b	1.61253	1.33461	FALSE	FALSE
NM_025937	114	33	67050	Nkap	2.36841	1.89889	FALSE	FALSE
NM_023232	143	26	66593	Diablo	2.46684	1.79535	FALSE	FALSE
NM_001163102	14	7	193838	Eme2	1.45763	1.22547	FALSE	FALSE
NM_001025309	296	48	224938	Pja2	2.78279	2.06161	FALSE	FALSE
NM_009881	32	7	12593	Cdyl	1.81665	1.22547	FALSE	FALSE
NM_175092	12	4	23912	Rhof	1.39068	1	FALSE	FALSE
NM_001195244	220	17	100503890	Pet100	2.65392	1.61082	FALSE	FALSE
NM_026554	310	25	68092	Ncbp2	2.80286	1.77831	FALSE	FALSE
NM_019651	42	11	56294	Ptpn9	1.93475	1.42177	FALSE	FALSE
NM_001166408	58	8	75646	Rai14	2.07493	1.28346	FALSE	FALSE
NM_001163388	59	14	68020	Apopt1	2.08235	1.5265	FALSE	FALSE
NM_013918	98	31	30940	Usp25	2.30273	1.87173	FALSE	FALSE
NM_001161816	32	1	433287	Gm15455	1.81665	1	FALSE	FALSE
NM_007858	404	92	13367	Diap1	2.91788	2.34416	FALSE	FALSE
NM_028343	353	83	72759	Tmem135	2.85928	2.29945	FALSE	FALSE
NM_172974	82	4	26895	Cops7b	2.22532	1	FALSE	FALSE
NM_153049	115	21	223701	Mkl1	2.3722	1.70259	FALSE	FALSE
NM_025982	325	60	67125	Tspan31	2.82338	2.15852	FALSE	FALSE
NM_011615	77	15	21945	Dedd	2.19799	1.55646	FALSE	FALSE
NM_027351	96	9	70225	Ppil3	2.29377	1.33461	FALSE	FALSE
NM_001164569	13	3	67338	Rffl	1.42544	1	FALSE	FALSE
NM_001100606	11	1	100113398	Adat3	1.35289	1	FALSE	FALSE
NM_001199271	27	1	20509	Slc19a1	1.74287	1	FALSE	FALSE
NM_029418	26	3	75758	9130401M01Rik	1.72647	1	FALSE	FALSE
NM_146168	56	28	232023	Vopp1	2.05969	1.82753	FALSE	FALSE
NM_001177543_dup2	161	18	NA	NA	2.51833	1.63564	FALSE	FALSE
NM_007964	43	9	14020	Evi5	1.94497	1.33461	FALSE	FALSE
NM_001166493	63	5	240168	Rasgrp3	2.11084	1.07934	FALSE	FALSE
NM_001037863	72	35	320940	Atp11c	2.16883	1.92444	FALSE	FALSE
NM_175683	87	13	227525	Dclre1c	2.25102	1.49432	FALSE	FALSE
NM_053204	48	4	111173	Erc1	1.99274	1	FALSE	FALSE
NM_019729	212	21	84092	Usp8	2.63784	1.70259	FALSE	FALSE
NM_007447	121	9	11727	Ang	2.39429	1.33461	FALSE	FALSE
NM_011660	3098	186	22166	Txn1	3.80258	2.64989	FALSE	FALSE
NM_001037746	220	45	328099	Prps1l3	2.65392	2.03358	FALSE	FALSE
NM_010788	43	10	17257	Mecp2	1.94497	1.38037	FALSE	FALSE
NM_025494	992	85	66335	Atp6v1c1	3.30801	2.30979	FALSE	FALSE
NM_001026212	180	19	56205	Ensa	2.56677	1.65913	FALSE	FALSE
NM_175027	27	1	237211	Fancb	1.74287	1	FALSE	FALSE
NM_010928	148	30	18129	Notch2	2.48176	1.85749	FALSE	FALSE
NM_001033988	503	63	27057	Ncoa4	3.01307	2.17971	FALSE	FALSE
NM_011426	509	105	20612	Siglec1	3.01822	2.40156	FALSE	FALSE
NM_172592	65	22	218543	Srek1	2.12441	1.7228	FALSE	FALSE
NM_001164420	132	21	66943	Pqlc1	2.43208	1.70259	FALSE	FALSE
NM_001076789	243	36	12419	Cbx5	2.69711	1.93667	FALSE	FALSE
NM_173432	12	0	244631	Pskh1	1.39068	1	FALSE	FALSE
NM_016755	1042	125	11957	Atp5j	3.32937	2.47728	FALSE	FALSE
NM_001005523	106	23	208606	Rsrc2	2.33681	1.7421	FALSE	FALSE
NM_027470	16	5	70584	Pak4	1.51562	1.07934	FALSE	FALSE
NM_001253870	196	32	235043	Tmem205	2.60376	1.88552	FALSE	FALSE
NM_026446	358	61	56470	Rgs19	2.86538	2.1657	FALSE	FALSE
NM_011185	2101	182	19170	Psmb1	3.63393	2.64044	FALSE	FALSE
NM_194462	32	6	100986	Akap9	1.81665	1.15852	FALSE	FALSE
NM_013653	20	1	20304	Ccl5	1.61253	1	FALSE	FALSE
NM_028866	133	14	74320	Wdr33	2.43535	1.5265	FALSE	FALSE
NM_001164689_dup1	135	12	NA	NA	2.44184	1.45955	FALSE	FALSE
NM_178363	38	6	56531	Ylpm1	1.89129	1.15852	FALSE	FALSE
NM_172787	16	2	237339	L3mbtl3	1.51562	1	FALSE	FALSE
NM_001142918	150	31	21416	Tcf7l2	2.48759	1.87173	FALSE	FALSE
NM_001195486	635	98	225027	Srsf7	3.11428	2.3716	FALSE	FALSE
NM_172116	123	11	213350	Pddc1	2.40141	1.42177	FALSE	FALSE
NM_023041	333	24	19298	Pex19	2.83395	1.76058	FALSE	FALSE
NM_030702	66	20	80886	Senp3	2.13105	1.6814	FALSE	FALSE
NM_021465	261	77	20843	Stag2	2.72814	2.26686	FALSE	FALSE
NM_001081181	112	14	68115	9430016H08Rik	2.36072	1.5265	FALSE	FALSE
NM_026752	81	8	68520	Zfyve21	2.21999	1.28346	FALSE	FALSE
NM_027614	17	2	70948	Wdr20rt	1.54195	1	FALSE	FALSE
NM_009067	84	25	19765	Ralbp1	2.23578	1.77831	FALSE	FALSE
NM_019817	640	60	56447	Copz1	3.11768	2.15852	FALSE	FALSE
NM_001110351	82	22	20466	Sin3a	2.22532	1.7228	FALSE	FALSE
NM_175287	109	30	97159	A430005L14Rik	2.34893	1.85749	FALSE	FALSE
NM_013477	1168	192	11972	Atp6v0d1	3.37894	2.66367	FALSE	FALSE
NM_178796	255	25	328830	A530064D06Rik	2.71804	1.77831	FALSE	FALSE
NM_199146	231	37	209387	Trim30d	2.67511	1.94857	FALSE	FALSE
NM_153580	138	42	233875	Ino80e	2.45138	2.00362	FALSE	FALSE
NM_133744	68	7	72454	Ccdc71	2.14401	1.22547	FALSE	FALSE
NM_175562	23	1	270160	Rab39	1.67323	1	FALSE	FALSE
NM_001166589	3875	370	276770	Eif5a	3.89977	2.94857	FALSE	FALSE
NM_139153	44	14	213990	Agap3	1.95495	1.5265	FALSE	FALSE
NM_020286	26	4	27027	Tspan32	1.72647	1	FALSE	FALSE
NM_177876	113	13	330192	Vps37b	2.36458	1.49432	FALSE	FALSE
NM_012049	180	33	27045	Nit1	2.56677	1.89889	FALSE	FALSE
NM_177186	18	3	320541	Slc35e2	1.56677	1	FALSE	FALSE
NM_029762	62	16	76832	Hyls1	2.10389	1.58449	FALSE	FALSE
NM_001164604	170	15	68501	Nsmce2	2.54195	1.55646	FALSE	FALSE
NM_001044704	48	0	22697	Zscan21	1.99274	1	FALSE	FALSE
NM_030243	139	40	71684	Rbm43	2.45452	1.98243	FALSE	FALSE
NM_027405	104	21	70373	Gpatch2l	2.32853	1.70259	FALSE	FALSE
NM_001253805	5681	412	22631	Ywhaz	4.06593	2.99527	FALSE	FALSE
NM_011879	891	89	24010	Ik	3.26138	2.32976	FALSE	FALSE
NM_001110229	955	232	14007	Celf2	3.2915	2.74586	FALSE	FALSE
NM_009210	116	32	20585	Hltf	2.37596	1.88552	FALSE	FALSE
NM_026033	18	41	67210	Gatad1	1.56677	1.99316	FALSE	FALSE
NM_001252433	38	19	13383	Dlg1	1.89129	1.65913	FALSE	FALSE
NM_008886	31	8	18861	Pms2	1.80286	1.28346	FALSE	FALSE
NM_001128198	48	2	230895	Vps13d	1.99274	1	FALSE	FALSE
NM_001082962	32	2	20646	Snrpn	1.81665	1	FALSE	FALSE
NM_031998	72	13	83922	Cep41	2.16883	1.49432	FALSE	FALSE
NM_198606	360	46	223499	Dcaf13	2.8678	2.04313	FALSE	FALSE
NM_001102415	23	6	117591	Slc2a9	1.67323	1.15852	FALSE	FALSE
NM_001081215	70	5	234311	Ddx60	2.1566	1.07934	FALSE	FALSE
NM_001161456	236	40	12400	Cbfb	2.68441	1.98243	FALSE	FALSE
NM_021472	1177	92	58809	Rnase4	3.38228	2.34416	FALSE	FALSE
NM_001177407_dup1	114	16	NA	NA	2.36841	1.58449	FALSE	FALSE
NM_178644	33	9	102644	Oaf	1.83002	1.33461	FALSE	FALSE
NM_172893	175	29	243771	Parp12	2.55454	1.84277	FALSE	FALSE
NM_198246	72	10	70120	Yars2	2.16883	1.38037	FALSE	FALSE
NM_019804	17	5	56375	B4galt4	1.54195	1.07934	FALSE	FALSE
NM_175294	956	139	98415	Nucks1	3.29196	2.52339	FALSE	FALSE
NM_022323	29	3	64113	Moap1	1.7739	1	FALSE	FALSE
NM_026169	193	38	67457	Frmd8	2.59706	1.96016	FALSE	FALSE
NM_013464	11	2	11622	Ahr	1.35289	1	FALSE	FALSE
NM_177128	18	2	320299	Iqcb1	1.56677	1	FALSE	FALSE
NM_175423	240	119	109305	Orai1	2.69171	2.45592	FALSE	FALSE
NM_026899	564	102	68991	Ssu72	3.06278	2.38897	FALSE	FALSE
NM_001199187	106	11	69090	Ascc1	2.33681	1.42177	FALSE	FALSE
NM_029094	63	5	74769	Pik3cb	2.11084	1.07934	FALSE	FALSE
NM_030225	484	62	78920	Dlst	2.99635	2.17276	FALSE	FALSE
NM_029623	233	37	76482	3110002H16Rik	2.67886	1.94857	FALSE	FALSE
NM_001081471	68	5	668178	Mettl7a3	2.14401	1.07934	FALSE	FALSE
NM_009272	251	43	20810	Srm	2.71118	2.01384	FALSE	FALSE
NM_026055	1596	98	67248	Rpl39	3.51453	2.3716	FALSE	FALSE
NM_008688	122	58	18029	Nfic	2.39786	2.1438	FALSE	FALSE
NM_001252455	33	8	19280	Ptprs	1.83002	1.28346	FALSE	FALSE
NM_001177402	90	9	68554	Cebpzos	2.26574	1.33461	FALSE	FALSE
NM_008828	10425	1197	18655	Pgk1	4.32958	3.45847	FALSE	FALSE
NM_001166596	3875	370	276770	Eif5a	3.89977	2.94857	FALSE	FALSE
NM_139140	15	5	72572	Spats2	1.48759	1.07934	FALSE	FALSE
NM_013749	45	4	27279	Tnfrsf12a	1.96471	1	FALSE	FALSE
NM_025533	278	35	66394	Nosip	2.75555	1.92444	FALSE	FALSE
NM_009975	1428	121	13001	Csnk2b	3.46623	2.46316	FALSE	FALSE
NM_012056	23	5	27055	Fkbp9	1.67323	1.07934	FALSE	FALSE
NM_199469	180	56	217365	Nploc4	2.56677	2.12856	FALSE	FALSE
NM_001164671	1175	231	15502	Dnaja1	3.38154	2.74398	FALSE	FALSE
NM_030250	173	28	52014	Nus1	2.54955	1.82753	FALSE	FALSE
NM_027412	71	6	70387	Ttc9c	2.16276	1.15852	FALSE	FALSE
NM_001253812	177	10	74195	Elp3	2.55947	1.38037	FALSE	FALSE
NM_013635	1351	196	19027	Sypl	3.44216	2.67263	FALSE	FALSE
NM_026020	1824	140	67186	Rplp2	3.57253	2.5265	FALSE	FALSE
NM_008613	51	4	17427	Mns1	2.01907	1	FALSE	FALSE
NM_153557	14	4	227622	BC029214	1.45763	1	FALSE	FALSE
NM_025829	48	13	66892	Eif4e3	1.99274	1.49432	FALSE	FALSE
NM_008143	4580	709	14694	Gnb2l1	3.97237	3.23102	FALSE	FALSE
NM_175935	151	24	68401	G6pc3	2.49048	1.76058	FALSE	FALSE
NM_001253715	186	41	110265	Msra	2.58101	1.99316	FALSE	FALSE
NM_001171053	142	29	116871	Mta3	2.46379	1.84277	FALSE	FALSE
NM_181796	37	5	14869	Gstp2	1.8797	1.07934	FALSE	FALSE
NM_001172117	545	103	15162	Hck	3.0479	2.39321	FALSE	FALSE
NM_133942	43	22	101476	Plekha1	1.94497	1.7228	FALSE	FALSE
NM_026914	426	38	69029	Smdt1	2.94091	1.96016	FALSE	FALSE
NM_001160019	826	121	208263	Tor1aip1	3.22848	2.46316	FALSE	FALSE
NM_001024922	161	31	234374	Ddx49	2.51833	1.87173	FALSE	FALSE
NM_026473	1396	224	67951	Tubb6	3.45639	2.73062	FALSE	FALSE
NM_133212	867	139	170744	Tlr8	3.24952	2.52339	FALSE	FALSE
NM_011192	539	101	19192	Psme3	3.04309	2.38469	FALSE	FALSE
NM_027881	75	8	71720	Osbpl3	2.18656	1.28346	FALSE	FALSE
NM_013640	469	59	19171	Psmb10	2.98267	2.15122	FALSE	FALSE
NM_144517	44	18	67249	Tbc1d19	1.95495	1.63564	FALSE	FALSE
NM_013558	13	2	15482	Hspa1l	1.42544	1	FALSE	FALSE
NM_001190733	12	1	100737	Dcun1d4	1.39068	1	FALSE	FALSE
NM_001080995	12	1	74041	Ddias	1.39068	1	FALSE	FALSE
NM_019765	28	14	56430	Clip1	1.75866	1.5265	FALSE	FALSE
NM_001164200	609	171	18749	Prkacb	3.09612	2.61337	FALSE	FALSE
NM_001164118	8601	802	20719	Serpinb6a	4.24605	3.28455	FALSE	FALSE
NM_001039201	128	10	76987	Hdhd2	2.41871	1.38037	FALSE	FALSE
NM_001081383	19	5	231051	Kmt2c	1.59026	1.07934	FALSE	FALSE
NM_025717	80	8	66704	Rbm4b	2.21459	1.28346	FALSE	FALSE
NM_144931	169	34	234664	Nae1	2.53939	1.91185	FALSE	FALSE
NM_010241	65	20	14339	Aktip	2.12441	1.6814	FALSE	FALSE
NM_011462	55	13	20729	Spin1	2.05186	1.49432	FALSE	FALSE
NM_178598	6488	556	21346	Tagln2	4.12361	3.12545	FALSE	FALSE
NM_001081109	13	0	231876	Lmtk2	1.42544	1	FALSE	FALSE
NM_016791	78	25	18018	Nfatc1	2.2036	1.77831	FALSE	FALSE
NM_019710	227	48	24061	Smc1a	2.66753	2.06161	FALSE	FALSE
NM_028394	57	9	72938	Hspb11	2.06738	1.33461	FALSE	FALSE
NM_010447	3979	352	15382	Hnrnpa1	3.91128	2.92692	FALSE	FALSE
NM_008327	12	3	26388	Ifi202b	1.39068	1	FALSE	FALSE
NM_001081075	67	15	70567	Fra10ac1	2.13758	1.55646	FALSE	FALSE
NM_001004155	21	4	268759	9930012K11Rik	1.63372	1	FALSE	FALSE
NM_173021	14	3	18679	Phka1	1.45763	1	FALSE	FALSE
NM_001033337	55	5	239570	Ttc38	2.05186	1.07934	FALSE	FALSE
NM_175654	12880	1059	319156	Hist1h4d	4.42142	3.40527	FALSE	FALSE
NM_126166	37	4	142980	Tlr3	1.8797	1	FALSE	FALSE
NM_001040696	44	10	637515	Nlrp1b	1.95495	1.38037	FALSE	FALSE
NM_001163641	104	13	84505	Setdb1	2.32853	1.49432	FALSE	FALSE
NM_001164275	19	1	546336	Prrg1	1.59026	1	FALSE	FALSE
NM_008392	46	22	16365	Irg1	1.97426	1.7228	FALSE	FALSE
NM_001081000	194	36	15547	Trmt2a	2.5993	1.93667	FALSE	FALSE
NM_001110131	51	39	71722	Cic	2.01907	1.97144	FALSE	FALSE
NM_029454	52	8	52023	Pibf1	2.0275	1.28346	FALSE	FALSE
NM_146124	629	54	228359	Arhgap1	3.11015	2.11277	FALSE	FALSE
NM_011790	37	2	23807	Arih2	1.8797	1	FALSE	FALSE
NM_001177709	165	25	228998	Arfgap1	2.52899	1.77831	FALSE	FALSE
NM_001081750	11	2	269704	Zfp664	1.35289	1	FALSE	FALSE
NM_001159604	96	26	80912	Pum1	2.29377	1.79535	FALSE	FALSE
NM_012005	58	31	26896	Med14	2.07493	1.87173	FALSE	FALSE
NM_001253391	39	0	67472	Mtfr1	1.90257	1	FALSE	FALSE
NM_010106	35542	3658	13627	Eef1a1	4.86224	3.94362	FALSE	FALSE
NM_001146161	78	18	18174	Slc11a2	2.2036	1.63564	FALSE	FALSE
NM_198026	55	8	230767	Iqcc	2.05186	1.28346	FALSE	FALSE
NM_021537	148	13	59041	Stk25	2.48176	1.49432	FALSE	FALSE
NM_011835	115	32	23924	Katna1	2.3722	1.88552	FALSE	FALSE
NM_001110265	67	30	22137	Ttk	2.13758	1.85749	FALSE	FALSE
NM_001159288	53	15	74522	Morc2a	2.03578	1.55646	FALSE	FALSE
NM_013684	93	10	21374	Tbp	2.27998	1.38037	FALSE	FALSE
NM_009823	32	15	12396	Cbfa2t2	1.81665	1.55646	FALSE	FALSE
NM_001199248	128	17	81601	Kat5	2.41871	1.61082	FALSE	FALSE
NM_019574	14	4	56218	Patz1	1.45763	1	FALSE	FALSE
NM_009764	50	12	12189	Brca1	2.01047	1.45955	FALSE	FALSE
NM_001168536	23	7	71891	Cdadc1	1.67323	1.22547	FALSE	FALSE
NM_025898	826	71	108124	Napa	3.22848	2.23163	FALSE	FALSE
NM_008132	33	6	14659	Glrp1	1.83002	1.15852	FALSE	FALSE
NM_009193	488	64	20492	Slbp	2.99992	2.18655	FALSE	FALSE
NM_023320	239	55	67220	Plekho1	2.6899	2.12074	FALSE	FALSE
NM_053194	160	25	101489	Ric8	2.51562	1.77831	FALSE	FALSE
NM_013763	138	22	27368	Tbl2	2.45138	1.7228	FALSE	FALSE
NM_028956	81	14	74467	Pus10	2.21999	1.5265	FALSE	FALSE
NM_010559	132	42	16194	Il6ra	2.43208	2.00362	FALSE	FALSE
NM_001142411	32	8	245174	Zfp937	1.81665	1.28346	FALSE	FALSE
NM_133991	92	15	54632	Ftsj1	2.27529	1.55646	FALSE	FALSE
NM_198642	15	9	271221	5031414D18Rik	1.48759	1.33461	FALSE	FALSE
NM_134020	382	41	103694	Tmed4	2.89356	1.99316	FALSE	FALSE
NM_019927	220	59	23806	Arih1	2.65392	2.15122	FALSE	FALSE
NM_026402	319	84	67841	Atg3	2.81529	2.30465	FALSE	FALSE
NM_011840	48	9	23938	Map2k5	1.99274	1.33461	FALSE	FALSE
NM_028659	1148	107	73830	Eif3k	3.37144	2.40976	FALSE	FALSE
NM_013507	1132	656	13690	Eif4g2	3.36535	3.19728	FALSE	FALSE
NM_145370	392	46	209318	Gps1	2.90479	2.04313	FALSE	FALSE
NM_177353	23	11	236727	Slc9a7	1.67323	1.42177	FALSE	FALSE
NM_001008425	193	36	386612	Thoc6	2.59706	1.93667	FALSE	FALSE
NM_001077687	19	9	80877	Lrba	1.59026	1.33461	FALSE	FALSE
NM_026688	522	68	68349	Ndufs3	3.02917	2.21288	FALSE	FALSE
NM_001252288	354	71	18293	Ogdh	2.8605	2.23163	FALSE	FALSE
NM_138756	115	15	192287	Slc25a36	2.3722	1.55646	FALSE	FALSE
NM_028545	60	2	73458	1700055N04Rik	2.08965	1	FALSE	FALSE
NM_029546	120	12	110816	Pwp2	2.39068	1.45955	FALSE	FALSE
NM_019992	1748	327	56792	Stap1	3.55404	2.89492	FALSE	FALSE
NM_025326	129	21	66058	Tmem176a	2.42209	1.70259	FALSE	FALSE
NM_026828	28	5	52838	Dnlz	1.75866	1.07934	FALSE	FALSE
NM_001165935	30	8	74268	Aven	1.78862	1.28346	FALSE	FALSE
NM_001243053	232	21	12036	Bcat2	2.67699	1.70259	FALSE	FALSE
NM_139063	37	5	17828	Bloc1s5	1.8797	1.07934	FALSE	FALSE
NM_001163159	227	25	13026	Pcyt1a	2.66753	1.77831	FALSE	FALSE
NM_025476	104	12	66302	Rmdn1	2.32853	1.45955	FALSE	FALSE
NM_029652	59	9	207952	Klhl25	2.08235	1.33461	FALSE	FALSE
NM_026613	68	32	68201	Ccdc34	2.14401	1.88552	FALSE	FALSE
NM_001164734	33	19	56524	Mpp6	1.83002	1.65913	FALSE	FALSE
NM_008187	126	24	14894	Cfap20	2.41187	1.76058	FALSE	FALSE
NM_145969	62	31	211922	Dennd6a	2.10389	1.87173	FALSE	FALSE
NM_011949	1297	228	26413	Mapk1	3.42444	2.73831	FALSE	FALSE
NM_009658	1607	168	11677	Akr1b3	3.51752	2.60568	FALSE	FALSE
NM_019668	436	63	22209	Ube2a	2.95099	2.17971	FALSE	FALSE
NM_023355	39	4	56322	Timm22	1.90257	1	FALSE	FALSE
NM_026143	628	77	67420	Far1	3.10946	2.26686	FALSE	FALSE
NM_025542	1028	113	66404	Rtfdc1	3.32349	2.43345	FALSE	FALSE
NM_001252543	472	46	27054	Sec23b	2.98544	2.04313	FALSE	FALSE
NM_001038664	102	5	14710	Gngt2	2.3201	1.07934	FALSE	FALSE
NM_011754	14	1	22689	Zfp27	1.45763	1	FALSE	FALSE
NM_172769	224	76	235293	Sc5d	2.66175	2.26119	FALSE	FALSE
NM_027777	12	5	71382	Pex1	1.39068	1.07934	FALSE	FALSE
NM_146036	790	170	217737	Ahsa1	3.20913	2.61082	FALSE	FALSE
NM_001039511	55	6	117198	Ivns1abp	2.05186	1.15852	FALSE	FALSE
NM_144791	531	92	208263	Tor1aip1	3.0366	2.34416	FALSE	FALSE
NM_001170869	80	8	78428	Wibg	2.21459	1.28346	FALSE	FALSE
NM_009089	204	39	20020	Polr2a	2.62113	1.97144	FALSE	FALSE
NM_010421	2356	939	15211	Hexa	3.68368	3.35304	FALSE	FALSE
NM_013499	874	113	12946	Cr1l	3.25301	2.43345	FALSE	FALSE
NM_001081347	19	3	69288	Rhobtb1	1.59026	1	FALSE	FALSE
NM_001080748	159	27	14886	Gtf2i	2.5129	1.81174	FALSE	FALSE
NM_024215	65	11	68040	Zfp593	2.12441	1.42177	FALSE	FALSE
NM_001013366	194	29	101240	Wdr91	2.5993	1.84277	FALSE	FALSE
NM_133887	667	74	100226	Stx12	3.13563	2.2496	FALSE	FALSE
NM_001001295	38	10	213550	Dis3l	1.89129	1.38037	FALSE	FALSE
NM_001025617	71	32	76025	Cant1	2.16276	1.88552	FALSE	FALSE
NM_001024526	404	100	207214	Larp4	2.91788	2.38037	FALSE	FALSE
NM_001200023	25	4	620419	Zfp963	1.70944	1	FALSE	FALSE
NM_029999	79	17	77889	Lbh	2.20913	1.61082	FALSE	FALSE
NM_024181	226	26	66861	Dnajc10	2.66561	1.79535	FALSE	FALSE
NM_144874	157	22	226139	Cox15	2.5074	1.7228	FALSE	FALSE
NM_177249	105	13	74996	Usp47	2.33269	1.49432	FALSE	FALSE
NM_001048227	22	11	52840	Dbndd2	1.65392	1.42177	FALSE	FALSE
NM_181279	232	39	107976	Bre	2.67699	1.97144	FALSE	FALSE
NM_001164147	22	8	21423	Tcf3	1.65392	1.28346	FALSE	FALSE
NM_024260	114	10	73288	Ccdc132	2.36841	1.38037	FALSE	FALSE
NM_133832	30	1	98711	Rdh10	1.78862	1	FALSE	FALSE
NM_207207	116	21	99045	Mrps26	2.37596	1.70259	FALSE	FALSE
NM_008019	595	81	14225	Fkbp1a	3.08602	2.28886	FALSE	FALSE
NM_001199308_dup1	62	0	NA	NA	2.10389	1	FALSE	FALSE
NM_021322	40	13	57773	Wdr4	1.91356	1.49432	FALSE	FALSE
NM_011530	170	23	21355	Tap2	2.54195	1.7421	FALSE	FALSE
NM_001172092	52	12	76131	Depdc1a	2.0275	1.45955	FALSE	FALSE
NM_009456	2092	138	22195	Ube2l3	3.63206	2.52025	FALSE	FALSE
NM_009229	80	15	20650	Sntb2	2.21459	1.55646	FALSE	FALSE
NM_027193	123	7	69740	Dph5	2.40141	1.22547	FALSE	FALSE
NM_133708	206	20	69080	Gmppa	2.62537	1.6814	FALSE	FALSE
NM_009096	4037	430	20104	Rps6	3.91756	3.01384	FALSE	FALSE
NM_001163836	12	4	67543	Pabpc6	1.39068	1	FALSE	FALSE
NM_001256033	50	8	73945	Otud4	2.01047	1.28346	FALSE	FALSE
NM_031406	85	12	83704	Slc12a9	2.24092	1.45955	FALSE	FALSE
NM_001039151	7931	770	12505	Cd44	4.21083	3.26686	FALSE	FALSE
NM_001122765	334	40	64383	Sirt2	2.83525	1.98243	FALSE	FALSE
NM_144801	37	5	70209	Tmem143	1.8797	1.07934	FALSE	FALSE
NM_177256	47	7	320769	Prdx6b	1.9836	1.22547	FALSE	FALSE
NM_021384	314	42	58185	Rsad2	2.80843	2.00362	FALSE	FALSE
NM_001101804_dup3	161	18	NA	NA	2.51833	1.63564	FALSE	FALSE
NM_181266	106	25	104348	Zfp120	2.33681	1.77831	FALSE	FALSE
NM_011552	115	13	21453	Tcof1	2.3722	1.49432	FALSE	FALSE
NM_133919	117	13	17355	Aff1	2.37969	1.49432	FALSE	FALSE
NM_019408	85	25	18034	Nfkb2	2.24092	1.77831	FALSE	FALSE
NM_001081259	110	11	226844	Mfsd7b	2.35289	1.42177	FALSE	FALSE
NM_207214	81	19	105504	Exoc5	2.21999	1.65913	FALSE	FALSE
NM_001177730	20	3	22259	Nr1h3	1.61253	1	FALSE	FALSE
NM_016980	4338	495	100503670	Rpl5	3.94879	3.07498	FALSE	FALSE
NM_009584	81	31	22791	Dnajc2	2.21999	1.87173	FALSE	FALSE
NM_001145779	101	40	16563	Kif2a	2.31582	1.98243	FALSE	FALSE
NM_021429	138	19	58240	Hs1bp3	2.45138	1.65913	FALSE	FALSE
NM_024471	108	19	79464	Lias	2.34493	1.65913	FALSE	FALSE
NM_025692	277	58	66663	Uba5	2.75398	2.1438	FALSE	FALSE
NM_001081145	17	1	68140	Tigd2	1.54195	1	FALSE	FALSE
NM_001033236	38	7	207965	Vcpkmt	1.89129	1.22547	FALSE	FALSE
NM_001252316	298	32	108037	Shmt2	2.78572	1.88552	FALSE	FALSE
NM_001199020	35	16	52477	Angel2	1.85557	1.58449	FALSE	FALSE
NM_001164059	14	0	20343	Sell	1.45763	1	FALSE	FALSE
NM_001177405_dup3	20	0	NA	NA	1.61253	1	FALSE	FALSE
NM_028017	293	22	108123	Napg	2.77837	1.7228	FALSE	FALSE
NM_001173550	10577	1358	12273	C5ar1	4.33586	3.51327	FALSE	FALSE
NM_011721	30	5	22427	Wrn	1.78862	1.07934	FALSE	FALSE
NM_027764	34	8	71330	Rcbtb1	1.84298	1.28346	FALSE	FALSE
NM_146003	21	5	215351	Senp6	1.63372	1.07934	FALSE	FALSE
NM_001105667	136	22	21915	Dtymk	2.44504	1.7228	FALSE	FALSE
NM_001162938	61	6	100033459	Pydc3	2.09683	1.15852	FALSE	FALSE
NM_001122992	38	7	56809	Gmeb1	1.89129	1.22547	FALSE	FALSE
NM_172585	235	77	217980	Larp4b	2.68257	2.26686	FALSE	FALSE
NM_001164433	31	9	171580	Mical1	1.80286	1.33461	FALSE	FALSE
NM_029502	71	32	76025	Cant1	2.16276	1.88552	FALSE	FALSE
NM_026194	161	15	67490	Ufl1	2.51833	1.55646	FALSE	FALSE
NM_011369	185	35	20419	Shcbp1	2.57867	1.92444	FALSE	FALSE
NM_026341	53	11	67725	Nudt13	2.03578	1.42177	FALSE	FALSE
NM_025362	62	12	66114	Dnajc30	2.10389	1.45955	FALSE	FALSE
NM_008907	20697	1730	268373	Ppia	4.62741	3.61842	FALSE	FALSE
NM_010726	319	36	16922	Phyh	2.81529	1.93667	FALSE	FALSE
NM_025432	152	6	66226	Trappc2	2.49335	1.15852	FALSE	FALSE
NM_008446	102	15	16571	Kif4	2.3201	1.55646	FALSE	FALSE
NM_015800	12	7	50766	Crim1	1.39068	1.22547	FALSE	FALSE
NM_001008506	64	39	75553	Zc3h14	2.11768	1.97144	FALSE	FALSE
NM_011905	232	16	24088	Tlr2	2.67699	1.58449	FALSE	FALSE
NM_134125	67	9	106628	Trip10	2.13758	1.33461	FALSE	FALSE
NM_145925	485	48	108705	Pttg1ip	2.99724	2.06161	FALSE	FALSE
NM_009614	486	281	11490	Adam15	2.99814	2.82908	FALSE	FALSE
NM_001166501	27	26	329260	Dennd1b	1.74287	1.79535	FALSE	FALSE
NM_173450	17	6	271842	Rpusd2	1.54195	1.15852	FALSE	FALSE
NM_001160402	20	1	277203	Tm4sf19	1.61253	1	FALSE	FALSE
NM_001205367	2100	269	235072	2016-09-07	3.63372	2.81012	FALSE	FALSE
NM_172967	30	1	269033	4930503L19Rik	1.78862	1	FALSE	FALSE
NM_134091	33	3	105835	Sgsm3	1.83002	1	FALSE	FALSE
NM_025995	168	44	67141	Fbxo5	2.53681	2.02383	FALSE	FALSE
NM_001163160	227	25	13026	Pcyt1a	2.66753	1.77831	FALSE	FALSE
NM_183167	86	19	233168	AI987944	2.246	1.65913	FALSE	FALSE
NM_027324	194	36	14057	Sfxn1	2.5993	1.93667	FALSE	FALSE
NM_011220	53	8	19286	Pts	2.03578	1.28346	FALSE	FALSE
NM_001199204	136	57	70834	Spag9	2.44504	2.13625	FALSE	FALSE
NM_029371	87	10	72459	Htatsf1	2.25102	1.38037	FALSE	FALSE
NM_001037997	100	16	14158	Fert2	2.3115	1.58449	FALSE	FALSE
NM_134150	775	55	107260	Otub1	3.2008	2.12074	FALSE	FALSE
NM_028242	87	10	72459	Htatsf1	2.25102	1.38037	FALSE	FALSE
NM_007616	101	9	12389	Cav1	2.31582	1.33461	FALSE	FALSE
NM_145468	57	3	27401	Skp2	2.06738	1	FALSE	FALSE
NM_018757	25	4	54369	Nme6	1.70944	1	FALSE	FALSE
NM_145950	36	22	209212	Osgin2	1.8678	1.7228	FALSE	FALSE
NM_011970	1417	156	26445	Psmb2	3.46287	2.5735	FALSE	FALSE
NM_010515	400	105	16004	Igf2r	2.91356	2.40156	FALSE	FALSE
NM_001163476	78	6	69270	Gins1	2.2036	1.15852	FALSE	FALSE
NM_053217	40	7	112419	2010002M12Rik	1.91356	1.22547	FALSE	FALSE
NM_001099319	51	6	100039968	Gm12942	2.01907	1.15852	FALSE	FALSE
NM_170590	197	33	266692	Cpne1	2.60597	1.89889	FALSE	FALSE
NM_001081633	68	8	27886	Dgcr14	2.14401	1.28346	FALSE	FALSE
NM_011673	77	40	22234	Ugcg	2.19799	1.98243	FALSE	FALSE
NM_008521	102	9	17001	Ltc4s	2.3201	1.33461	FALSE	FALSE
NM_001037759	190	50	170755	Sgk3	2.59026	2.07934	FALSE	FALSE
NM_001110193	949	190	16331	Inpp5d	3.28877	2.65913	FALSE	FALSE
NM_001037922	21	4	624855	Cks1brt	1.63372	1	FALSE	FALSE
NM_001198913	345	69	16800	Arhgef2	2.84932	2.21922	FALSE	FALSE
NM_001163542	604	98	18810	Plec	3.09254	2.3716	FALSE	FALSE
NM_023409	5752	376	67963	Npc2	4.07132	2.95556	FALSE	FALSE
NM_010560	131	20	16195	Il6st	2.42877	1.6814	FALSE	FALSE
NM_153153	33	7	225115	Svil	1.83002	1.22547	FALSE	FALSE
NM_198619	44	7	242747	Zfp933	1.95495	1.22547	FALSE	FALSE
NM_153782	14	8	208659	Fam20a	1.45763	1.28346	FALSE	FALSE
NM_001130151	212	82	16801	Arhgef1	2.63784	2.29419	FALSE	FALSE
NM_001253863	113	33	21406	Tcf12	2.36458	1.89889	FALSE	FALSE
NM_009786	459	95	12301	Cacybp	2.97331	2.3581	FALSE	FALSE
NM_030715	140	41	80905	Polh	2.45763	1.99316	FALSE	FALSE
NM_021498	123	25	59001	Pole3	2.40141	1.77831	FALSE	FALSE
NM_025641	470	26	66576	Uqcrh	2.9836	1.79535	FALSE	FALSE
NM_001172148	48	4	237073	Rbm41	1.99274	1	FALSE	FALSE
NM_133933	1454	309	103963	Rpn1	3.47407	2.87033	FALSE	FALSE
NM_022309	327	58	12400	Cbfb	2.82605	2.1438	FALSE	FALSE
NM_009412	969	81	21985	Tpd52	3.29783	2.28886	FALSE	FALSE
NM_018869	15	2	14773	Grk5	1.48759	1	FALSE	FALSE
NM_008020	376	47	14227	Fkbp2	2.88669	2.05247	FALSE	FALSE
NM_001113383	311	72	14660	Gls	2.80426	2.2377	FALSE	FALSE
NM_172725	81	8	231855	Ap5z1	2.21999	1.28346	FALSE	FALSE
NM_138679	37	4	192195	Ash1l	1.8797	1	FALSE	FALSE
NM_029609	86	13	76429	Lhpp	2.246	1.49432	FALSE	FALSE
NM_009298	102	18	20935	Surf6	2.3201	1.63564	FALSE	FALSE
NM_001270495	118	10	100039257	Tmem254b	2.38338	1.38037	FALSE	FALSE
NM_001013256	61	11	68964	Ctc1	2.09683	1.42177	FALSE	FALSE
NM_133757	108	37	74451	Pgs1	2.34493	1.94857	FALSE	FALSE
NM_028071	3645	332	72042	Cotl1	3.8732	2.90151	FALSE	FALSE
NM_001113527	23	1	57444	Isg20	1.67323	1	FALSE	FALSE
NM_029775	161	49	76863	Dcun1d5	2.51833	2.07057	FALSE	FALSE
NM_021876	232	66	13626	Eed	2.67699	2.19992	FALSE	FALSE
NM_001193303	537	92	110829	Lims1	3.04148	2.34416	FALSE	FALSE
NM_001098837	12	5	217218	Atxn7l3	1.39068	1.07934	FALSE	FALSE
NM_177205	15	3	230996	9430015G10Rik	1.48759	1	FALSE	FALSE
NM_008899	14	12	18992	Pou3f2	1.45763	1.45955	FALSE	FALSE
NM_181424	21	1	52856	Mtg2	1.63372	1	FALSE	FALSE
NM_001079876	162	24	237436	Gas2l3	2.52102	1.76058	FALSE	FALSE
NM_174868	13	2	215708	Fam73a	1.42544	1	FALSE	FALSE
NM_028291	24	8	72587	Pan3	1.69171	1.28346	FALSE	FALSE
NM_007645	1325	171	12493	Cd37	3.43372	2.61337	FALSE	FALSE
NM_027799	75	42	71452	Ankrd40	2.18656	2.00362	FALSE	FALSE
NM_145437	528	57	217305	Cd300ld	3.03414	2.13625	FALSE	FALSE
NM_026521	164	56	68036	Zfp706	2.52635	2.12856	FALSE	FALSE
NM_008204	91	30	14990	H2-M2	2.27054	1.85749	FALSE	FALSE
NM_153197	174	20	73149	Clec4a3	2.55205	1.6814	FALSE	FALSE
NM_001085493	32	6	76947	Ndufaf6	1.81665	1.15852	FALSE	FALSE
NM_001161823	99	34	230674	Kdm4a	2.30714	1.91185	FALSE	FALSE
NM_001025262	997	103	21985	Tpd52	3.3102	2.39321	FALSE	FALSE
NM_001163425	200	17	66915	Myeov2	2.61253	1.61082	FALSE	FALSE
NM_001168240	14	2	65099	Irak1bp1	1.45763	1	FALSE	FALSE
NM_153056	132	25	209011	Sirt7	2.43208	1.77831	FALSE	FALSE
NM_001164226	77	5	18181	Nrf1	2.19799	1.07934	FALSE	FALSE
NM_001081642	13	3	434794	Xlr4a	1.42544	1	FALSE	FALSE
NM_011602	1681	271	21894	Tln1	3.53707	2.81334	FALSE	FALSE
NM_133869	548	77	99712	Cept1	3.05028	2.26686	FALSE	FALSE
NM_001024849	118	11	329575	Gm14325	2.38338	1.42177	FALSE	FALSE
NM_007630	443	137	12442	Ccnb2	2.95791	2.51709	FALSE	FALSE
NM_001017968	22	15	503610	Zdhhc18	1.65392	1.55646	FALSE	FALSE
NM_001166480	985	97	20832	Ssr4	3.30494	2.36714	FALSE	FALSE
NM_001163300	158	21	224903	Safb	2.51016	1.70259	FALSE	FALSE
NM_010227	2209	542	192176	Flna	3.6557	3.11437	FALSE	FALSE
NM_011488	97	33	20850	Stat5a	2.29827	1.89889	FALSE	FALSE
NM_001163018	96	32	52615	Suz12	2.29377	1.88552	FALSE	FALSE
NM_144896	52	9	229487	Gatb	2.0275	1.33461	FALSE	FALSE
NM_153489	487	85	74383	Ubap2l	2.99903	2.30979	FALSE	FALSE
NM_019736	290	57	56360	Acot9	2.7739	2.13625	FALSE	FALSE
NM_001077360	171	28	26431	Git2	2.5445	1.82753	FALSE	FALSE
NM_001177626	144	10	13605	Ect2	2.46986	1.38037	FALSE	FALSE
NM_001029855	962	124	19188	Psme2	3.29468	2.47379	FALSE	FALSE
NM_007454	935	144	11764	Ap1b1	3.28231	2.53873	FALSE	FALSE
NM_016676	727	87	19325	Rab10	3.17304	2.31989	FALSE	FALSE
NM_028127	87	6	319710	Frmd6	2.25102	1.15852	FALSE	FALSE
NM_145158	412	128	246707	Emilin2	2.9264	2.48758	FALSE	FALSE
NM_023294	266	60	67052	Ndc80	2.73638	2.15852	FALSE	FALSE
NM_025748	37	3	66757	Adat2	1.8797	1	FALSE	FALSE
NM_023423	281	78	68050	Akirin1	2.76021	2.27247	FALSE	FALSE
NM_175034	31	3	317750	Slc24a5	1.80286	1	FALSE	FALSE
NM_173047	55	8	109857	Cbr3	2.05186	1.28346	FALSE	FALSE
NM_027236	62	11	69860	Eif1ad	2.10389	1.42177	FALSE	FALSE
NM_145994	699	76	11308	Abi1	3.15598	2.26119	FALSE	FALSE
NM_028475	470	88	74383	Ubap2l	2.9836	2.32486	FALSE	FALSE
NM_001136496	33	6	71508	Zfp935	1.83002	1.15852	FALSE	FALSE
NM_009579	63	12	22782	Slc30a1	2.11084	1.45955	FALSE	FALSE
NM_016742	844	116	12539	Cdc37	3.23784	2.44483	FALSE	FALSE
NM_011343	1850	750	20335	Sec61g	3.57867	3.25543	FALSE	FALSE
NM_001085408	42	21	68112	Sdccag3	1.93475	1.70259	FALSE	FALSE
NM_001146222	201	19	66310	Dpy30	2.6147	1.65913	FALSE	FALSE
NM_001080388	95	17	13728	Mark2	2.28923	1.61082	FALSE	FALSE
NM_010191	188	37	14137	Fdft1	2.58566	1.94857	FALSE	FALSE
NM_023647	157	27	93790	Nipa2	2.5074	1.81174	FALSE	FALSE
NM_001205095	61	17	240038	Gm4944	2.09683	1.61082	FALSE	FALSE
NM_001163627	70	6	73942	Fam151b	2.1566	1.15852	FALSE	FALSE
NM_008961	91	10	19212	Pter	2.27054	1.38037	FALSE	FALSE
NM_010700	362	90	16835	Ldlr	2.87021	2.33461	FALSE	FALSE
NM_001025587	73	12	75692	Nr2c2ap	2.17482	1.45955	FALSE	FALSE
NM_025924	40	10	67031	Upf3a	1.91356	1.38037	FALSE	FALSE
NM_008378	180	14	16210	Impact	2.56677	1.5265	FALSE	FALSE
NM_010418	38	11	15204	Herc2	1.89129	1.42177	FALSE	FALSE
NM_001035525	45	7	100317	AU040320	1.96471	1.22547	FALSE	FALSE
NM_007653	5696	785	12512	Cd63	4.06707	3.27524	FALSE	FALSE
NM_145425	27	7	216560	Wdpcp	1.74287	1.22547	FALSE	FALSE
NM_020566	54	2	57431	Dnajc4	2.0439	1	FALSE	FALSE
NM_001159616	30	19	56176	Pigp	1.78862	1.65913	FALSE	FALSE
NM_001039169	354	37	26987	Eif4e2	2.8605	1.94857	FALSE	FALSE
NM_144839	19	5	218793	Ube2e2	1.59026	1.07934	FALSE	FALSE
NM_001080969	36	5	66628	Thg1l	1.8678	1.07934	FALSE	FALSE
NM_011508	3410	655	20918	Eif1	3.84426	3.19661	FALSE	FALSE
NM_133187	65	12	68659	Fam198b	2.12441	1.45955	FALSE	FALSE
NM_001008705	322	31	231889	Bud31	2.81936	1.87173	FALSE	FALSE
NM_010235	21	7	14283	Fosl1	1.63372	1.22547	FALSE	FALSE
NM_028791	229	45	74157	Cmtr1	2.67134	2.03358	FALSE	FALSE
NM_172540	56	21	215201	Trmt2b	2.05969	1.70259	FALSE	FALSE
NM_030026	41	10	78038	Mccc2	1.92429	1.38037	FALSE	FALSE
NM_001136071	1169	123	16985	Lsp1	3.37932	2.47028	FALSE	FALSE
NM_019702	70	3	56422	Hbs1l	2.1566	1	FALSE	FALSE
NM_001029843	288	45	22367	Vrk1	2.77089	2.03358	FALSE	FALSE
NM_001252616	27	5	53618	Fut8	1.74287	1.07934	FALSE	FALSE
NM_001040396	412	45	69227	Selt	2.9264	2.03358	FALSE	FALSE
NM_007420	83	26	11555	Adrb2	2.23058	1.79535	FALSE	FALSE
NM_001037761	2870	327	12345	Capzb	3.76938	2.89492	FALSE	FALSE
NM_201392	560	121	18810	Plec	3.05969	2.46316	FALSE	FALSE
NM_010763	34	5	17156	Man1a2	1.84298	1.07934	FALSE	FALSE
NM_001166650	13	1	208968	Zfp280c	1.42544	1	FALSE	FALSE
NM_008403	83	17	16413	Itgb1bp1	2.23058	1.61082	FALSE	FALSE
NM_023149	2596	290	66054	Cndp2	3.72581	2.84277	FALSE	FALSE
NM_001008543	147	20	17859	Mxi1	2.47882	1.6814	FALSE	FALSE
NM_023431	42	10	68114	Mum1	1.93475	1.38037	FALSE	FALSE
NM_011290	6281	613	19988	Rpl6	4.10953	3.16783	FALSE	FALSE
NM_011401	13	1	20527	Slc2a3	1.42544	1	FALSE	FALSE
NM_001166456	251	34	105727	Slc38a1	2.71118	1.91185	FALSE	FALSE
NM_030093	26	1	78372	Snrnp25	1.72647	1	FALSE	FALSE
NM_007806	3127	397	13057	Cyba	3.80663	2.97916	FALSE	FALSE
NM_175646	33	3	234723	Txnl4b	1.83002	1	FALSE	FALSE
NM_001168223	53	6	70809	Clec2g	2.03578	1.15852	FALSE	FALSE
NM_001205083	145	38	20778	Scarb1	2.47287	1.96016	FALSE	FALSE
NM_001163635	72	24	74493	Tnks2	2.16883	1.76058	FALSE	FALSE
NM_001164289	86	9	628705	Phf11c	2.246	1.33461	FALSE	FALSE
NM_001044389	86	31	270166	Clpx	2.246	1.87173	FALSE	FALSE
NM_025950	47	17	67072	Cdc37l1	1.9836	1.61082	FALSE	FALSE
NM_008384	87	17	16329	Inpp1	2.25102	1.61082	FALSE	FALSE
NM_027927	199	33	71793	Ints12	2.61035	1.89889	FALSE	FALSE
NM_024258	52	11	74112	Usp16	2.0275	1.42177	FALSE	FALSE
NM_001110145	1231	226	20823	Ssb	3.40176	2.73448	FALSE	FALSE
NM_001256133	159	29	93790	Nipa2	2.5129	1.84277	FALSE	FALSE
NM_009000	66	15	19336	Rab24	2.13105	1.55646	FALSE	FALSE
NM_019870	178	15	56292	Naa10	2.56192	1.55646	FALSE	FALSE
NM_001166539	666	72	15361	Hmga1	3.13498	2.2377	FALSE	FALSE
NM_177824	59	7	328829	9830107B12Rik	2.08235	1.22547	FALSE	FALSE
NM_022331	173	21	64209	Herpud1	2.54955	1.70259	FALSE	FALSE
NM_026177	257	72	67467	Gpalpp1	2.72143	2.2377	FALSE	FALSE
NM_025554	286	19	66420	Polr2e	2.76787	1.65913	FALSE	FALSE
NM_008708	64	14	18108	Nmt2	2.11768	1.5265	FALSE	FALSE
NM_001099348_dup1	43	20	NA	NA	1.94497	1.6814	FALSE	FALSE
NM_030563	29	7	80750	N4bp1	1.7739	1.22547	FALSE	FALSE
NM_018851	987	139	56045	Samhd1	3.30582	2.52339	FALSE	FALSE
NM_010118	66	16	13654	Egr2	2.13105	1.58449	FALSE	FALSE
NM_175149	65	14	69551	2310022B05Rik	2.12441	1.5265	FALSE	FALSE
NM_181854	82	11	101994	Champ1	2.22532	1.42177	FALSE	FALSE
NM_026887	347	54	108012	Ap1s2	2.85183	2.11277	FALSE	FALSE
NM_001141976	416	60	72119	Tpx2	2.93059	2.15852	FALSE	FALSE
NM_172607	21	3	223646	Naprt	1.63372	1	FALSE	FALSE
NM_001130529	15	6	268417	Zkscan17	1.48759	1.15852	FALSE	FALSE
NM_030233	81	6	78935	Saal1	2.21999	1.15852	FALSE	FALSE
NM_178185_dup1	13161	1210	NA	NA	4.43079	3.46316	FALSE	FALSE
NM_029631	38	4	76491	Abhd14b	1.89129	1	FALSE	FALSE
NM_026043	26	9	67225	Rnpc3	1.72647	1.33461	FALSE	FALSE
NM_031201	259	37	22122	Tsta3	2.7248	1.94857	FALSE	FALSE
NM_009817	532	141	12380	Cast	3.03741	2.52959	FALSE	FALSE
NM_001252443	748	142	21787	Tfg	3.1854	2.53266	FALSE	FALSE
NM_029349	45	12	227446	2310035C23Rik	1.96471	1.45955	FALSE	FALSE
NM_019566	646	185	56212	Rhog	3.12173	2.64754	FALSE	FALSE
NM_031869	190	25	19079	Prkab1	2.59026	1.77831	FALSE	FALSE
NM_001164793	11	4	28015	Polr2m	1.35289	1	FALSE	FALSE
NM_007572	5464	934	12259	C1qa	4.04901	3.35072	FALSE	FALSE
NM_001170907	128	17	56404	Trip4	2.41871	1.61082	FALSE	FALSE
NM_001033448	75	19	381201	Ap5b1	2.18656	1.65913	FALSE	FALSE
NM_025521	69	7	66374	2310011J03Rik	2.15035	1.22547	FALSE	FALSE
NM_178087	136	14	18854	Pml	2.44504	1.5265	FALSE	FALSE
NM_001171034	5058	407	110213	Tmbim6	4.01548	2.98997	FALSE	FALSE
NM_183423	17	7	66350	Pla2g12a	1.54195	1.22547	FALSE	FALSE
NM_009963	20	0	12953	Cry2	1.61253	1	FALSE	FALSE
NM_181821	157	31	353502	Hcfc1r1	2.5074	1.87173	FALSE	FALSE
NM_199477	66	5	393082	Mettl7a2	2.13105	1.07934	FALSE	FALSE
NM_198654	98	12	381318	Nsl1	2.30273	1.45955	FALSE	FALSE
NM_001167730	144	33	58186	Rad18	2.46986	1.89889	FALSE	FALSE
NM_001081975	383	42	100034361	Mfap1b	2.8947	2.00362	FALSE	FALSE
NM_145832	64	8	228368	Slc35c1	2.11768	1.28346	FALSE	FALSE
NM_011852	852	96	23960	Oas1g	3.24194	2.36264	FALSE	FALSE
NM_001033534	22	3	244864	Layn	1.65392	1	FALSE	FALSE
NM_011135	47	10	18983	Cnot7	1.9836	1.38037	FALSE	FALSE
NM_172988	16	4	269514	Fbxl4	1.51562	1	FALSE	FALSE
NM_028834	67	10	74243	Slx4ip	2.13758	1.38037	FALSE	FALSE
NM_001113355	1335	209	30930	Vps26a	3.43698	2.70052	FALSE	FALSE
NM_008601	305	79	17342	Mitf	2.7958	2.278	FALSE	FALSE
NM_031182	25	5	83383	Tfap4	1.70944	1.07934	FALSE	FALSE
NM_145362	121	37	208211	Alg1	2.39429	1.94857	FALSE	FALSE
NM_153545	16	2	217366	Lrrc45	1.51562	1	FALSE	FALSE
NM_148952	64	21	104394	E2f4	2.11768	1.70259	FALSE	FALSE
NM_177367	51	5	276919	Gemin4	2.01907	1.07934	FALSE	FALSE
NM_025837	87	16	110119	Mpi	2.25102	1.58449	FALSE	FALSE
NM_007998	99	28	14151	Fech	2.30714	1.82753	FALSE	FALSE
NM_001145820	78	19	14571	Gpd2	2.2036	1.65913	FALSE	FALSE
NM_026780	481	33	68592	Syf2	2.99365	1.89889	FALSE	FALSE
NM_001253703	80	19	229681	St7l	2.21459	1.65913	FALSE	FALSE
NM_138748	534	58	110854	Ppp2r4	3.03904	2.1438	FALSE	FALSE
NM_001006664	208	37	13821	Epb4.1l1	2.62956	1.94857	FALSE	FALSE
NM_145528	90	8	51897	Atg13	2.26574	1.28346	FALSE	FALSE
NM_030691	490	51	80719	Igsf6	3.0017	2.08794	FALSE	FALSE
NM_133666	272	42	17995	Ndufv1	2.74607	2.00362	FALSE	FALSE
NM_026960	279	29	69146	Gsdmd	2.75711	1.84277	FALSE	FALSE
NM_018824	487	69	54338	Slc23a2	2.99903	2.21922	FALSE	FALSE
NM_025338	279	30	66077	Aurkaip1	2.75711	1.85749	FALSE	FALSE
NM_028841	16	2	74257	Tspan17	1.51562	1	FALSE	FALSE
NM_001243067	31	9	73610	Zfp433	1.80286	1.33461	FALSE	FALSE
NM_025468	497	84	66286	Sec11c	3.00786	2.30465	FALSE	FALSE
NM_021886	114	12	26886	Cenph	2.36841	1.45955	FALSE	FALSE
NM_019773	164	10	56382	Rab9	2.52635	1.38037	FALSE	FALSE
NM_001025432	19	6	12914	Crebbp	1.59026	1.15852	FALSE	FALSE
NM_133851	484	101	108907	Nusap1	2.99635	2.38469	FALSE	FALSE
NM_009448	16983	1533	22146	Tuba1c	4.54152	3.56591	FALSE	FALSE
NM_001015039	20	1	231125	Zfyve28	1.61253	1	FALSE	FALSE
NM_027808	27	2	71481	Alpk1	1.74287	1	FALSE	FALSE
NM_001081117	206	91	17345	Mki67	2.62537	2.33941	FALSE	FALSE
NM_026270	74	9	67605	Akt1s1	2.18073	1.33461	FALSE	FALSE
NM_001114332	427	161	72472	Slc16a10	2.94193	2.5872	FALSE	FALSE
NM_001164191	126	19	17772	Mtm1	2.41187	1.65913	FALSE	FALSE
NM_028049	130	23	71999	Fbxo22	2.42544	1.7421	FALSE	FALSE
NM_001039392	1319	100	19240	Tmsb10	3.43175	2.38037	FALSE	FALSE
NM_001013378	46	14	231915	Uspl1	1.97426	1.5265	FALSE	FALSE
NM_001004143	294	54	216825	Usp22	2.77985	2.11277	FALSE	FALSE
NM_153387	75	13	51885	Tubgcp4	2.18656	1.49432	FALSE	FALSE
NM_183250	219	27	66167	Tma7	2.65195	1.81174	FALSE	FALSE
NM_001166430	2162	294	98758	Hnrnpf	3.64636	2.84872	FALSE	FALSE
NM_009541	14	3	22642	Zbtb17	1.45763	1	FALSE	FALSE
NM_001098227	7098	1101	53378	Sdcbp	4.16264	3.42216	FALSE	FALSE
NM_001159964	373	127	13858	Eps15	2.88321	2.48418	FALSE	FALSE
NM_144866	661	124	225363	Etf1	3.1317	2.47379	FALSE	FALSE
NM_001166360	16	11	77877	6030458C11Rik	1.51562	1.42177	FALSE	FALSE
NM_001083810	17	9	72446	Prr5l	1.54195	1.33461	FALSE	FALSE
NM_001270537	445	68	668218	Bin2	2.95986	2.21288	FALSE	FALSE
NM_027901	63	16	71752	Gtf3c2	2.11084	1.58449	FALSE	FALSE
NM_016686	111	29	22344	Vezf1	2.35682	1.84277	FALSE	FALSE
NM_001164533	243	34	65111	Dap3	2.69711	1.91185	FALSE	FALSE
NM_029420	22	1	75764	Slx1b	1.65392	1	FALSE	FALSE
NM_146150	144	64	230598	Nrd1	2.46986	2.18655	FALSE	FALSE
NM_001130169	987	148	22680	Zfp207	3.30582	2.55063	FALSE	FALSE
NM_201406	423	78	276846	Pigs	2.93784	2.27247	FALSE	FALSE
NM_025280	78	11	16588	Kin	2.2036	1.42177	FALSE	FALSE
NM_025679	166	27	66641	Sike1	2.53161	1.81174	FALSE	FALSE
NM_021334	224	36	16411	Itgax	2.66175	1.93667	FALSE	FALSE
NM_172939	17	1	268301	Sowahc	1.54195	1	FALSE	FALSE
NM_021525	41	9	59028	Rcl1	1.92429	1.33461	FALSE	FALSE
NM_011823	106	21	23890	Gpr34	2.33681	1.70259	FALSE	FALSE
NM_020034	4167	366	56702	Hist1h1b	3.93132	2.94385	FALSE	FALSE
NM_009831	482	135	12450	Ccng1	2.99455	2.51071	FALSE	FALSE
NM_028232	32	11	72415	Sgol1	1.81665	1.42177	FALSE	FALSE
NM_025864	611	172	66950	Tmem206	3.09754	2.6159	FALSE	FALSE
NM_007929	576	64	13731	Emp2	3.07192	2.18655	FALSE	FALSE
NM_026582	383	121	68151	Wls	2.8947	2.46316	FALSE	FALSE
NM_177583	194	36	208117	Aph1b	2.5993	1.93667	FALSE	FALSE
NM_010806	11	13	17356	Mllt4	1.35289	1.49432	FALSE	FALSE
NM_199301	70	7	212508	Mtg1	2.1566	1.22547	FALSE	FALSE
NM_013771	697	152	27377	Yme1l1	3.15473	2.56222	FALSE	FALSE
NM_001013824	41	2	435337	Gm5662	1.92429	1	FALSE	FALSE
NM_010547	149	27	16151	Ikbkg	2.48469	1.81174	FALSE	FALSE
NM_153178	72	37	239528	Ago2	2.16883	1.94857	FALSE	FALSE
NM_001033156	67	24	70611	Fbxo33	2.13758	1.76058	FALSE	FALSE
NM_146239	145	21	237459	Cdk17	2.47287	1.70259	FALSE	FALSE
NM_172272	16	1	230577	Pars2	1.51562	1	FALSE	FALSE
NM_145599	43	3	234463	Tmem184c	1.94497	1	FALSE	FALSE
NM_027000	325	42	69237	Gtpbp4	2.82338	2.00362	FALSE	FALSE
NM_080638	457	63	78388	Mvp	2.97142	2.17971	FALSE	FALSE
NM_007712	76	35	12748	Clk2	2.19232	1.92444	FALSE	FALSE
NM_001033606	111	34	74205	Acsl3	2.35682	1.91185	FALSE	FALSE
NM_001039723	44	9	330189	Tmem120b	1.95495	1.33461	FALSE	FALSE
NM_025389	177	16	66156	Anapc11	2.55947	1.58449	FALSE	FALSE
NM_178775	26	10	320119	Rps6kc1	1.72647	1.38037	FALSE	FALSE
NM_001253691	14	4	56218	Patz1	1.45763	1	FALSE	FALSE
NM_013872	23	5	29858	Pmm1	1.67323	1.07934	FALSE	FALSE
NM_001177480_dup1	63	1	NA	NA	2.11084	1	FALSE	FALSE
NM_001142920	143	25	21416	Tcf7l2	2.46684	1.77831	FALSE	FALSE
NM_013515	1539	124	13830	Stom	3.49874	2.47379	FALSE	FALSE
NM_172416	295	68	14628	Ostm1	2.78132	2.21288	FALSE	FALSE
NM_001161413	2094	349	17254	Slc3a2	3.63248	2.9232	FALSE	FALSE
NM_001163532	78	6	72392	Tmem175	2.2036	1.15852	FALSE	FALSE
NM_015827	607	93	50797	Copb2	3.09469	2.34886	FALSE	FALSE
NM_001159551	940	177	14950	H13	3.28463	2.62835	FALSE	FALSE
NM_001080158	12	0	66570	Cenpm	1.39068	1	FALSE	FALSE
NM_025811	45	14	66866	Nhlrc2	1.96471	1.5265	FALSE	FALSE
NM_001040187	296	101	67040	Ddx17	2.78279	2.38469	FALSE	FALSE
NM_001077695	38	3	17978	Ncoa2	1.89129	1	FALSE	FALSE
NM_026674	281	53	68318	Aph1c	2.76021	2.10465	FALSE	FALSE
NM_029572	937	174	76299	Erp44	3.28324	2.62092	FALSE	FALSE
NM_026124	292	74	67388	1110008F13Rik	2.77688	2.2496	FALSE	FALSE
NM_145502	227	29	226144	Erlin1	2.66753	1.84277	FALSE	FALSE
NM_001252524	2167	703	233489	Picalm	3.64736	3.22733	FALSE	FALSE
NM_001195083	83	43	54383	Phc2	2.23058	2.01384	FALSE	FALSE
NM_026393	153	41	67824	Nmral1	2.49619	1.99316	FALSE	FALSE
NM_175116	468	48	67168	Lpar6	2.98175	2.06161	FALSE	FALSE
NM_008959	75	51	19210	Ptdss1	2.18656	2.08794	FALSE	FALSE
NM_001243041	378	48	11534	Adk	2.88899	2.06161	FALSE	FALSE
NM_025442	380	76	66248	Alg5	2.89129	2.26119	FALSE	FALSE
NM_001252490	61	40	64291	Osbpl1a	2.09683	1.98243	FALSE	FALSE
NM_026601	14	0	68180	Hyi	1.45763	1	FALSE	FALSE
NM_001252201	83	34	26921	Map4k4	2.23058	1.91185	FALSE	FALSE
NM_026519	355	45	68032	Emc4	2.86173	2.03358	FALSE	FALSE
NM_019694	158	19	56384	Letm1	2.51016	1.65913	FALSE	FALSE
NM_023343	35	21	67444	Ilkap	1.85557	1.70259	FALSE	FALSE
NM_008722	3415	386	18148	Npm1	3.84489	2.96696	FALSE	FALSE
NM_001205339	470	34	107272	Psat1	2.9836	1.91185	FALSE	FALSE
NM_001101433	27	22	71918	Zcchc24	1.74287	1.7228	FALSE	FALSE
NM_001112705	24	9	24086	Tlk2	1.69171	1.33461	FALSE	FALSE
NM_023813	547	131	108058	Camk2d	3.04949	2.49764	FALSE	FALSE
NM_028221	225	23	102122	Fam192a	2.66368	1.7421	FALSE	FALSE
NM_001163554	20	7	18987	Pou2f2	1.61253	1.22547	FALSE	FALSE
NM_177323	43	2	72772	Rint1	1.94497	1	FALSE	FALSE
NM_025873	26	3	66966	Trit1	1.72647	1	FALSE	FALSE
NM_020588	27	8	57439	Tmem183a	1.74287	1.28346	FALSE	FALSE
NM_026591	425	41	67707	Mrpl24	2.93989	1.99316	FALSE	FALSE
NM_177688	4999	453	232440	H2afj	4.01038	3.03647	FALSE	FALSE
NM_153167	23	12	242418	Dcaf10	1.67323	1.45955	FALSE	FALSE
NM_001033145	35	26	68861	1190002N15Rik	1.85557	1.79535	FALSE	FALSE
NM_172579	19	1	217692	Sipa1l1	1.59026	1	FALSE	FALSE
NM_172261	53	15	217124	Ppp1r9b	2.03578	1.55646	FALSE	FALSE
NM_026186	113	13	67480	Cwc25	2.36458	1.49432	FALSE	FALSE
NM_145564	144	16	231670	Fbxo21	2.46986	1.58449	FALSE	FALSE
NM_001198787	26	4	11302	Aatk	1.72647	1	FALSE	FALSE
NM_001109657	261	51	14457	Gas7	2.72814	2.08794	FALSE	FALSE
NM_026876	152	13	98685	Trmt1l	2.49335	1.49432	FALSE	FALSE
NM_019940	47	15	56707	Zfp111	1.9836	1.55646	FALSE	FALSE
NM_001160043	24	1	73172	Exo5	1.69171	1	FALSE	FALSE
NM_001195025	66	15	74137	Nuak2	2.13105	1.55646	FALSE	FALSE
NM_025374	404	40	109801	Glo1	2.91788	1.98243	FALSE	FALSE
NM_178700	116	47	231413	Grsf1	2.37596	2.05247	FALSE	FALSE
NM_001165985	445	77	74383	Ubap2l	2.95986	2.26686	FALSE	FALSE
NM_010738	22	3	110454	Ly6a	1.65392	1	FALSE	FALSE
NM_013861	41	8	29807	Tpk1	1.92429	1.28346	FALSE	FALSE
NM_001166669	58	8	216766	Gemin5	2.07493	1.28346	FALSE	FALSE
NM_025424	120	27	66208	Nenf	2.39068	1.81174	FALSE	FALSE
NM_001037941	254	59	23950	Dnajb6	2.71634	2.15122	FALSE	FALSE
NM_172405	73	13	70681	Fam175a	2.17482	1.49432	FALSE	FALSE
NM_001130459	756	152	21452	Tcn2	3.19002	2.56222	FALSE	FALSE
NM_009606	20869	1958	11459	Acta1	4.631	3.67219	FALSE	FALSE
NM_019636	53	14	57915	Tbc1d1	2.03578	1.5265	FALSE	FALSE
NM_029561	145	50	76273	Ndfip2	2.47287	2.07934	FALSE	FALSE
NM_173442	422	43	14537	Gcnt1	2.93681	2.01384	FALSE	FALSE
NM_145511	234	19	226499	BC003331	2.68072	1.65913	FALSE	FALSE
NM_025590	74	9	329910	Acot11	2.18073	1.33461	FALSE	FALSE
NM_029279	38	4	75420	Secisbp2	1.89129	1	FALSE	FALSE
NM_025301	385	27	27397	Mrpl17	2.89696	1.81174	FALSE	FALSE
NM_007482	302	33	11846	Arg1	2.79151	1.89889	FALSE	FALSE
NM_025969	60	1	67105	Timm21	2.08965	1	FALSE	FALSE
NM_011885	117	9	24030	Mrps12	2.37969	1.33461	FALSE	FALSE
NM_009853	14469	1867	12514	Cd68	4.47194	3.65152	FALSE	FALSE
NM_011232	64	9	19355	Rad1	2.11768	1.33461	FALSE	FALSE
NM_134142	882	68	68539	Tmem109	3.25697	2.21288	FALSE	FALSE
NM_145942	338	116	208715	Hmgcs1	2.84042	2.44483	FALSE	FALSE
NM_011962	419	63	26433	Plod3	2.93372	2.17971	FALSE	FALSE
NM_019683	71	1	56503	Ankrd49	2.16276	1	FALSE	FALSE
NM_008810	425	66	18597	Pdha1	2.93989	2.19992	FALSE	FALSE
NM_001037848	18	5	72068	Cnot2	1.56677	1.07934	FALSE	FALSE
NM_008249	56	11	15278	Tfb2m	2.05969	1.42177	FALSE	FALSE
NM_028904	176	29	74386	Rmi1	2.55701	1.84277	FALSE	FALSE
NM_001160379	139	35	212943	Fam46a	2.45452	1.92444	FALSE	FALSE
NM_001043317	13	4	12483	Cd22	1.42544	1	FALSE	FALSE
NM_010121	27	12	13666	Eif2ak3	1.74287	1.45955	FALSE	FALSE
NM_001167886	29	5	225888	Suv420h1	1.7739	1.07934	FALSE	FALSE
NM_001025577	643	149	17132	Maf	3.11971	2.55356	FALSE	FALSE
NM_198001	43	10	73737	1110008P14Rik	1.94497	1.38037	FALSE	FALSE
NM_152803	123	37	15442	Hpse	2.40141	1.94857	FALSE	FALSE
NM_021550	340	42	59048	C1galt1c1	2.84298	2.00362	FALSE	FALSE
NM_011647	32	21	22084	Tsc2	1.81665	1.70259	FALSE	FALSE
NM_013814	100	30	14423	Galnt1	2.3115	1.85749	FALSE	FALSE
NM_001005867	39	10	52915	Zmiz2	1.90257	1.38037	FALSE	FALSE
NM_175512	249	42	241452	Dhrs9	2.7077	2.00362	FALSE	FALSE
NM_001163705	129	18	50762	Fbxo6	2.42209	1.63564	FALSE	FALSE
NM_016897	179	38	53600	Timm23	2.56435	1.96016	FALSE	FALSE
NM_175242	276	86	76448	Ppp1r18	2.75241	2.31487	FALSE	FALSE
NM_001081320	33	3	72023	Cyb561d1	1.83002	1	FALSE	FALSE
NM_009938	830	136	12847	Copa	3.23058	2.51391	FALSE	FALSE
NM_153794	114	34	108654	Fam210a	2.36841	1.91185	FALSE	FALSE
NM_001177406_dup3	109	18	NA	NA	2.34893	1.63564	FALSE	FALSE
NM_001199177	118	34	74143	Opa1	2.38338	1.91185	FALSE	FALSE
NM_001005508	232	45	226652	Arhgap30	2.67699	2.03358	FALSE	FALSE
NM_027457	160	25	70544	Tmem242	2.51562	1.77831	FALSE	FALSE
NM_001177753	160	32	170768	Pfkfb3	2.51562	1.88552	FALSE	FALSE
NM_013678	62	9	20931	Surf2	2.10389	1.33461	FALSE	FALSE
NM_001113470	29	22	52468	Ctdsp2	1.7739	1.7228	FALSE	FALSE
NM_133781	667	154	12283	Cab39	3.13563	2.56789	FALSE	FALSE
NM_009798	3474	414	12345	Capzb	3.85233	2.99737	FALSE	FALSE
NM_177262	130	51	320795	Pkn1	2.42544	2.08794	FALSE	FALSE
NM_025635	586	52	52696	Zwint	3.0794	2.09638	FALSE	FALSE
NM_053168	28	4	94091	Trim11	1.75866	1	FALSE	FALSE
NM_001033299	44	10	228913	Zfp217	1.95495	1.38037	FALSE	FALSE
NM_001013792	130	31	432940	Otulin	2.42544	1.87173	FALSE	FALSE
NM_001253758	199	19	66471	Anp32e	2.61035	1.65913	FALSE	FALSE
NM_001127338	164	16	110695	Aldh7a1	2.52635	1.58449	FALSE	FALSE
NM_001199043	808	78	56048	Lgals8	3.21891	2.27247	FALSE	FALSE
NM_207530	36	16	64291	Osbpl1a	1.8678	1.58449	FALSE	FALSE
NM_133907	72	16	100763	Ube3c	2.16883	1.58449	FALSE	FALSE
NM_022964	484	59	56743	Lat2	2.99635	2.15122	FALSE	FALSE
NM_009404	79	14	21950	Tnfsf9	2.20913	1.5265	FALSE	FALSE
NM_027088	37	7	104416	Bap1	1.8797	1.22547	FALSE	FALSE
NM_001081247	57	2	218832	Polr3a	2.06738	1	FALSE	FALSE
NM_026959	119	29	71116	Stx18	2.38705	1.84277	FALSE	FALSE
NM_001159418	359	42	16391	Irf9	2.8666	2.00362	FALSE	FALSE
NM_001042655	90	17	233204	Tbc1d17	2.26574	1.61082	FALSE	FALSE
NM_194342	220	56	223697	Sun2	2.65392	2.12856	FALSE	FALSE
NM_001007465	11	4	67338	Rffl	1.35289	1	FALSE	FALSE
NM_001199307_dup1	62	0	NA	NA	2.10389	1	FALSE	FALSE
NM_001036740	97	30	232984	B3gnt8	2.29827	1.85749	FALSE	FALSE
NM_021437	79	2	58248	1700123O20Rik	2.20913	1	FALSE	FALSE
NM_001033202	44	15	100756	Usp30	1.95495	1.55646	FALSE	FALSE
NM_178609	25	5	52679	E2f7	1.70944	1.07934	FALSE	FALSE
NM_028005	19	4	71923	2310047M10Rik	1.59026	1	FALSE	FALSE
NM_009471	243	41	22247	Umps	2.69711	1.99316	FALSE	FALSE
NM_133688	41	6	67636	Lyrm5	1.92429	1.15852	FALSE	FALSE
NM_029789	1230	316	76893	Cers2	3.40141	2.88006	FALSE	FALSE
NM_172742	143	30	233315	Mtmr10	2.46684	1.85749	FALSE	FALSE
NM_001162416	58	13	18640	Pfkfb2	2.07493	1.49432	FALSE	FALSE
NM_146011	90	23	216445	Arhgap9	2.26574	1.7421	FALSE	FALSE
NM_176849	90	28	234023	Arglu1	2.26574	1.82753	FALSE	FALSE
NM_027181	321	25	69713	Pin4	2.81801	1.77831	FALSE	FALSE
NM_029929	218	39	77573	Vps33a	2.64996	1.97144	FALSE	FALSE
NM_026810	62	3	17350	Mlh1	2.10389	1	FALSE	FALSE
NM_028184	75	6	72284	Oraov1	2.18656	1.15852	FALSE	FALSE
NM_008915	11	16	19057	Ppp3cc	1.35289	1.58449	FALSE	FALSE
NM_025936	803	117	104458	Rars	3.21622	2.44856	FALSE	FALSE
NM_023233	26	9	66597	Trim13	1.72647	1.33461	FALSE	FALSE
NM_175093	12	1	228775	Trib3	1.39068	1	FALSE	FALSE
NM_134133	67	4	106878	Smim3	2.13758	1	FALSE	FALSE
NM_198122	37	10	94246	Arid4b	1.8797	1.38037	FALSE	FALSE
NM_145933	115	17	20440	St6gal1	2.3722	1.61082	FALSE	FALSE
NM_019650	265	52	56494	Gosr2	2.73475	2.09638	FALSE	FALSE
NM_001166409	2619	141	19652	Rbm3	3.72964	2.52959	FALSE	FALSE
NM_028412	46	7	68379	Ciz1	1.97426	1.22547	FALSE	FALSE
NM_001163389	27	4	74479	Snx11	1.74287	1	FALSE	FALSE
NM_016721	1704	240	29875	Iqgap1	3.54297	2.76058	FALSE	FALSE
NM_029293	110	12	75454	Phpt1	2.35289	1.45955	FALSE	FALSE
NM_007859	11	1	13368	Dffb	1.35289	1	FALSE	FALSE
NM_001163684	234	27	66394	Nosip	2.68072	1.81174	FALSE	FALSE
NM_025983	618	37	67126	Atp5e	3.10249	1.94857	FALSE	FALSE
NM_001081654	203	24	21767	Tex264	2.619	1.76058	FALSE	FALSE
NM_011614	78	38	21944	Tnfsf12	2.2036	1.96016	FALSE	FALSE
NM_027350	747	83	70223	Nars	3.18482	2.29945	FALSE	FALSE
NM_080708	116	64	140780	Bmp2k	2.37596	2.18655	FALSE	FALSE
NM_001164568	113	20	20469	Sipa1	2.36458	1.6814	FALSE	FALSE
NM_001199270	1660	166	353204	Aldoart1	3.53161	2.60048	FALSE	FALSE
NM_146169	35	10	232164	Paip2b	1.85557	1.38037	FALSE	FALSE
NM_180956	168	25	29812	Ndrg3	2.53681	1.77831	FALSE	FALSE
NM_172382	99	34	230674	Kdm4a	2.30714	1.91185	FALSE	FALSE
NM_001177543_dup3	159	20	NA	NA	2.5129	1.6814	FALSE	FALSE
NM_007622	210	27	12412	Cbx1	2.63372	1.81174	FALSE	FALSE
NM_145494	120	38	107029	Me2	2.39068	1.96016	FALSE	FALSE
NM_018745	246	58	54375	Azin1	2.70244	2.1438	FALSE	FALSE
NM_007965	1008	137	14026	Evl	3.31496	2.51709	FALSE	FALSE
NM_153134	13	5	210146	Irgq	1.42544	1.07934	FALSE	FALSE
NM_144888	211	28	228607	Mavs	2.63578	1.82753	FALSE	FALSE
NM_001002008	15	2	381066	Zfp948	1.48759	1	FALSE	FALSE
NM_032396	25	1	84035	Kremen1	1.70944	1	FALSE	FALSE
NM_001110831	221	27	13437	Dnpep	2.65589	1.81174	FALSE	FALSE
NM_001037747	147	9	332579	Card9	2.47882	1.33461	FALSE	FALSE
NM_010789	15	1	17268	Meis1	1.48759	1	FALSE	FALSE
NM_028603	25	5	73680	Zbtb8a	1.70944	1.07934	FALSE	FALSE
NM_029482	41	3	75939	4930579G24Rik	1.92429	1	FALSE	FALSE
NM_025495	56	8	66336	Cenpp	2.05969	1.28346	FALSE	FALSE
NM_001146348	253	27	13805	Eng	2.71462	1.81174	FALSE	FALSE
NM_175026	339	37	236312	Pyhin1	2.8417	1.94857	FALSE	FALSE
NM_010929	14	5	18132	Notch4	1.45763	1.07934	FALSE	FALSE
NM_173363	380	32	217869	Eif5	2.89129	1.88552	FALSE	FALSE
NM_153141	79	38	59035	Carm1	2.20913	1.96016	FALSE	FALSE
NM_172593	37	7	218613	Mier3	1.8797	1.22547	FALSE	FALSE
NM_001164421	132	21	66943	Pqlc1	2.43208	1.70259	FALSE	FALSE
NM_145076	15	6	21848	Trim24	1.48759	1.15852	FALSE	FALSE
NM_001099349_dup6	186	22	NA	NA	2.58101	1.7228	FALSE	FALSE
NM_001199151	21	6	67847	Sncaip	1.63372	1.15852	FALSE	FALSE
NM_026447	33	20	67905	Ppm1m	1.83002	1.6814	FALSE	FALSE
NM_011184	1372	136	19167	Psma3	3.44886	2.51391	FALSE	FALSE
NM_013652	418	45	20303	Ccl4	2.93268	2.03358	FALSE	FALSE
NM_001142919	150	31	21416	Tcf7l2	2.48759	1.87173	FALSE	FALSE
NM_001195487	597	86	225027	Srsf7	3.08748	2.31487	FALSE	FALSE
NM_172117	47	11	12497	Entpd6	1.9836	1.42177	FALSE	FALSE
NM_023040	83	5	11692	Gfer	2.23058	1.07934	FALSE	FALSE
NM_026753	114	25	68523	Fam96b	2.36841	1.77831	FALSE	FALSE
NM_001033273	223	85	223739	5031439G07Rik	2.65981	2.30979	FALSE	FALSE
NM_011070	280	21	18637	Pfdn2	2.75866	1.70259	FALSE	FALSE
NM_009066	29	6	19763	Ring1	1.7739	1.15852	FALSE	FALSE
NM_019816	64	10	56321	Aatf	2.11768	1.38037	FALSE	FALSE
NM_001110350	82	22	20466	Sin3a	2.22532	1.7228	FALSE	FALSE
NM_133921	45	32	100978	Nfxl1	1.96471	1.88552	FALSE	FALSE
NM_018877	104	13	84505	Setdb1	2.32853	1.49432	FALSE	FALSE
NM_029086	32	6	74753	5830415F09Rik	1.81665	1.15852	FALSE	FALSE
NM_172733	366	51	232449	Dera	2.87498	2.08794	FALSE	FALSE
NM_138667	79	23	68652	Tab2	2.20913	1.7421	FALSE	FALSE
NM_029617	60	14	76464	Casc5	2.08965	1.5265	FALSE	FALSE
NM_029976	122	27	52626	Cdkn2aipnl	2.39786	1.81174	FALSE	FALSE
NM_175563	200	45	270906	Prr11	2.61253	2.03358	FALSE	FALSE
NM_001082552	110	23	20821	Trim21	2.35289	1.7421	FALSE	FALSE
NM_025507	436	47	66354	Snw1	2.95099	2.05247	FALSE	FALSE
NM_012048	58	9	27015	Polk	2.07493	1.33461	FALSE	FALSE
NM_001253354	20	9	230088	Fam214b	1.61253	1.33461	FALSE	FALSE
NM_029763	97	10	70408	Polr3f	2.29827	1.38037	FALSE	FALSE
NM_001199124	294	59	66442	Spc25	2.77985	2.15122	FALSE	FALSE
NM_001044705	48	0	22697	Zscan21	1.99274	1	FALSE	FALSE
NM_027404	93	15	70369	Bag5	2.27998	1.55646	FALSE	FALSE
NM_001253804	110	28	20498	Slc12a4	2.35289	1.82753	FALSE	FALSE
NM_001110228	944	231	14007	Celf2	3.28647	2.74398	FALSE	FALSE
NM_001122683	17	1	71911	Bdh1	1.54195	1	FALSE	FALSE
NM_009211	178	62	20588	Smarcc1	2.56192	2.17276	FALSE	FALSE
NM_026032	36	9	67207	Lsm1	1.8678	1.33461	FALSE	FALSE
NM_009729	4296	273	11984	Atp6v0c	3.94457	2.81653	FALSE	FALSE
NM_001177379	10	13	231207	Cpeb2	1.3115	1.49432	FALSE	FALSE
NM_001146010	63	12	207278	Fchsd2	2.11084	1.45955	FALSE	FALSE
NM_009912	855	141	12768	Ccr1	3.24347	2.52959	FALSE	FALSE
NM_133954	73	16	101985	Usb1	2.17482	1.58449	FALSE	FALSE
NM_031999	253	35	83924	Gpr137b	2.71462	1.92444	FALSE	FALSE
NM_001102414	19	6	117591	Slc2a9	1.59026	1.15852	FALSE	FALSE
NM_001081214	45	10	226169	Pprc1	1.96471	1.38037	FALSE	FALSE
NM_001161457	220	38	12400	Cbfb	2.65392	1.96016	FALSE	FALSE
NM_027130	126	23	69597	Afg3l2	2.41187	1.7421	FALSE	FALSE
NM_021473	3973	465	58810	Akr1a1	3.91062	3.04783	FALSE	FALSE
NM_026638	290	38	52858	Cdipt	2.7739	1.96016	FALSE	FALSE
NM_001100416	182	25	668030	Gm14432	2.57157	1.77831	FALSE	FALSE
NM_178645	532	68	104184	Blmh	3.03741	2.21288	FALSE	FALSE
NM_009075	35	11	19895	Rpia	1.85557	1.42177	FALSE	FALSE
NM_019805	223	36	56317	Anapc7	2.65981	1.93667	FALSE	FALSE
NM_176979	32	45	235559	Topbp1	1.81665	2.03358	FALSE	FALSE
NM_026168	177	21	67456	Ergic2	2.55947	1.70259	FALSE	FALSE
NM_001252568	74	12	227696	Phyhd1	2.18073	1.45955	FALSE	FALSE
NM_178115	17	4	214764	Edrf1	1.54195	1	FALSE	FALSE
NM_001159421	130	14	381045	Ccdc58	2.42544	1.5265	FALSE	FALSE
NM_001256480_dup1	188	26	NA	NA	2.58566	1.79535	FALSE	FALSE
NM_177411	428	83	19344	Rab5b	2.94295	2.29945	FALSE	FALSE
NM_026898	71	6	68980	Wdr53	2.16276	1.15852	FALSE	FALSE
NM_001199186	75	26	68682	Slc44a2	2.18656	1.79535	FALSE	FALSE
NM_172618	81	15	224671	Btbd9	2.21999	1.55646	FALSE	FALSE
NM_009273	486	46	20813	Srp14	2.99814	2.04313	FALSE	FALSE
NM_001167921	182	33	68153	Gtf2e2	2.57157	1.89889	FALSE	FALSE
NM_026054	126	13	67246	2810474O19Rik	2.41187	1.49432	FALSE	FALSE
NM_008689	136	22	18033	Nfkb1	2.44504	1.7228	FALSE	FALSE
NM_029965	33	3	77733	Rnf170	1.83002	1	FALSE	FALSE
NM_001252454	55	13	13854	Epn1	2.05186	1.49432	FALSE	FALSE
NM_007547	3164	1056	19261	Sirpa	3.81174	3.40404	FALSE	FALSE
NM_022418	17	0	64295	Tmub1	1.54195	1	FALSE	FALSE
NM_001177403	90	9	68554	Cebpzos	2.26574	1.33461	FALSE	FALSE
NM_001166597	75	42	104418	Dgkz	2.18656	2.00362	FALSE	FALSE
NM_139141	31	1	93681	Zkscan8	1.80286	1	FALSE	FALSE
NM_175318	83	15	101685	Spty2d1	2.23058	1.55646	FALSE	FALSE
NM_009974	248	110	13000	Csnk2a2	2.70595	2.42177	FALSE	FALSE
NM_012057	391	211	27056	Irf5	2.90368	2.70465	FALSE	FALSE
NM_134007	101	19	52637	Cisd1	2.31582	1.65913	FALSE	FALSE
NM_178854	125	22	231464	Cnot6l	2.40841	1.7228	FALSE	FALSE
NM_030251	61	8	80283	Abtb1	2.09683	1.28346	FALSE	FALSE
NM_001253813	246	22	105722	Ano6	2.70244	1.7228	FALSE	FALSE
NM_013634	62	8	19014	Med1	2.10389	1.28346	FALSE	FALSE
NM_026021	19	19	67187	Zmynd19	1.59026	1.65913	FALSE	FALSE
NM_001113346	163	41	234366	Gatad2a	2.52369	1.99316	FALSE	FALSE
NM_008612	186	25	17420	Mnat1	2.58101	1.77831	FALSE	FALSE
NM_153556	18	4	227099	Pms1	1.56677	1	FALSE	FALSE
NM_177378	123	18	330812	Rnf150	2.40141	1.63564	FALSE	FALSE
NM_025828	548	121	66890	Lman2	3.05028	2.46316	FALSE	FALSE
NM_008142	860	220	14688	Gnb1	3.246	2.7228	FALSE	FALSE
NM_175934	96	18	52040	Ppp1r10	2.29377	1.63564	FALSE	FALSE
NM_053124	254	57	93762	Smarca5	2.71634	2.13625	FALSE	FALSE
NM_001253714	203	39	110265	Msra	2.619	1.97144	FALSE	FALSE
NM_001171052	142	29	116871	Mta3	2.46379	1.84277	FALSE	FALSE
NM_133943	324	42	101502	Hsd3b7	2.82205	2.00362	FALSE	FALSE
NM_030682	102	7	21897	Tlr1	2.3201	1.22547	FALSE	FALSE
NM_001097979_dup1	21982	1717	NA	NA	4.65357	3.61514	FALSE	FALSE
NM_001081203	81	19	243272	Sbno1	2.21999	1.65913	FALSE	FALSE
NM_026915	12	1	69032	Lyzl4	1.39068	1	FALSE	FALSE
NM_009369	6143	786	21810	Tgfbi	4.09988	3.27579	FALSE	FALSE
NM_019979	523	191	80795	Selk	3.03	2.66141	FALSE	FALSE
NM_001160018	486	93	208263	Tor1aip1	2.99814	2.34886	FALSE	FALSE
NM_177464	101	17	52013	R3hcc1l	2.31582	1.61082	FALSE	FALSE
NM_001029977	114	60	214403	Gm4788	2.36841	2.15852	FALSE	FALSE
NM_026472	467	71	67949	Nifk	2.98082	2.23163	FALSE	FALSE
NM_011193	322	31	19200	Pstpip1	2.81936	1.87173	FALSE	FALSE
NM_001042527	36	4	12144	Blm	1.8678	1	FALSE	FALSE
NM_027880	21	1	71718	Telo2	1.63372	1	FALSE	FALSE
NM_053090	112	7	84652	Fam126a	2.36072	1.22547	FALSE	FALSE
NM_144516	83	26	66505	Zmynd11	2.23058	1.79535	FALSE	FALSE
NM_178371	123	22	77031	Slc9a8	2.40141	1.7228	FALSE	FALSE
NM_001077189	1010	200	14130	Fcgr2b	3.31582	2.6814	FALSE	FALSE
NM_001170341	388	39	30853	Mlf2	2.90033	1.97144	FALSE	FALSE
NM_013559	306	43	15505	Hsph1	2.79722	2.01384	FALSE	FALSE
NM_011386	422	55	20482	Skil	2.93681	2.12074	FALSE	FALSE
NM_001039200	396	58	230866	Emc1	2.9092	2.1438	FALSE	FALSE
NM_001081382	15	6	72306	Zfp777	1.48759	1.15852	FALSE	FALSE
NM_025716	24	4	66701	Spryd4	1.69171	1	FALSE	FALSE
NM_001017983	26	9	239554	Foxred2	1.72647	1.33461	FALSE	FALSE
NM_010240	2256	993	14325	Ftl1	3.66484	3.37732	FALSE	FALSE
NM_027264	52	16	69930	Zfp715	2.0275	1.58449	FALSE	FALSE
NM_178599	169	43	27784	Commd8	2.53939	2.01384	FALSE	FALSE
NM_030035	41	6	224139	Golgb1	1.92429	1.15852	FALSE	FALSE
NM_001081108	332	26	66096	Lamtor4	2.83264	1.79535	FALSE	FALSE
NM_011333	7312	721	20296	Ccl2	4.17554	3.23831	FALSE	FALSE
NM_019711	43	7	56516	Rbms2	1.94497	1.22547	FALSE	FALSE
NM_001177601	60	16	104457	0610010K14Rik	2.08965	1.58449	FALSE	FALSE
NM_001033765	20	0	237880	1700071K01Rik	1.61253	1	FALSE	FALSE
NM_001205025	181	14	67767	Jagn1	2.56918	1.5265	FALSE	FALSE
NM_028140	72	14	72175	Mfsd8	2.16883	1.5265	FALSE	FALSE
NM_001111021	133	26	12394	Runx1	2.43535	1.79535	FALSE	FALSE
NM_008326	583	82	15944	Irgm1	3.07717	2.29419	FALSE	FALSE
NM_001048143	17	3	270096	Mon1b	1.54195	1	FALSE	FALSE
NM_001079824	95	18	432467	Hnrnph3	2.28923	1.63564	FALSE	FALSE
NM_153398	33	11	268294	Zbtb24	1.83002	1.42177	FALSE	FALSE
NM_198416	19	3	108946	Zzz3	1.59026	1	FALSE	FALSE
NM_183225	42	6	329908	Usp24	1.93475	1.15852	FALSE	FALSE
NM_001037170	43	4	641376	Tomm40l	1.94497	1	FALSE	FALSE
NM_001033336	43	15	239273	Abcc4	1.94497	1.55646	FALSE	FALSE
NM_001161853	484	73	20587	Smarcb1	2.99635	2.2437	FALSE	FALSE
NM_175655	12627	1098	319157	Hist1h4f	4.4128	3.42097	FALSE	FALSE
NM_001163495	75	15	71085	Arhgap19	2.18656	1.55646	FALSE	FALSE
NM_001163640	20	9	69993	Chn2	1.61253	1.33461	FALSE	FALSE
NM_001164274	50	4	29808	Mga	2.01047	1	FALSE	FALSE
NM_027912	53	10	71767	Tysnd1	2.03578	1.38037	FALSE	FALSE
NM_001110130	190	13	66101	Ppih	2.59026	1.49432	FALSE	FALSE
NM_011791	197	40	23808	Ash2l	2.60597	1.98243	FALSE	FALSE
NM_001177708	166	25	228998	Arfgap1	2.53161	1.77831	FALSE	FALSE
NM_020575	201	56	57438	2016-03-07	2.6147	2.12856	FALSE	FALSE
NM_001039194	175	21	71361	Aifm2	2.55454	1.70259	FALSE	FALSE
NM_001033383	18	11	319748	Zfp865	1.56677	1.42177	FALSE	FALSE
NM_001159605	109	29	80912	Pum1	2.34893	1.84277	FALSE	FALSE
NM_001253390	39	0	67472	Mtfr1	1.90257	1	FALSE	FALSE
NM_001255994	15	1	140629	Ubox5	1.48759	1	FALSE	FALSE
NM_001168371	140	31	71472	Usp19	2.45763	1.87173	FALSE	FALSE
NM_001141965	378	93	67877	Naa20	2.88899	2.34886	FALSE	FALSE
NM_134054	326	42	104725	Sptssa	2.82472	2.00362	FALSE	FALSE
NM_001165941	32	10	74455	Nsun6	1.81665	1.38037	FALSE	FALSE
NM_198027	64	9	233065	Alkbh6	2.11768	1.33461	FALSE	FALSE
NM_021536	74	26	59040	Rhot1	2.18073	1.79535	FALSE	FALSE
NM_013685	170	20	21413	Tcf4	2.54195	1.6814	FALSE	FALSE
NM_001199249	128	17	81601	Kat5	2.41871	1.61082	FALSE	FALSE
NM_019575	106	17	56214	Scamp4	2.33681	1.61082	FALSE	FALSE
NM_001128094	36	17	224088	Atp13a3	1.8678	1.61082	FALSE	FALSE
NM_001042408	94	15	27366	Txnl4a	2.28463	1.55646	FALSE	FALSE
NM_028207	547	53	72349	Dusp3	3.04949	2.10465	FALSE	FALSE
NM_001168537	23	7	71891	Cdadc1	1.67323	1.22547	FALSE	FALSE
NM_007561	42	8	12168	Bmpr2	1.93475	1.28346	FALSE	FALSE
NM_148934	85	13	110012	Tpgs1	2.24092	1.49432	FALSE	FALSE
NM_022432	316	51	64383	Sirt2	2.81119	2.08794	FALSE	FALSE
NM_025899	787	102	67003	Uqcrc2	3.20748	2.38897	FALSE	FALSE
NM_008133	1292	176	14661	Glud1	3.42276	2.62589	FALSE	FALSE
NM_009192	185	9	20491	Sla	2.57867	1.33461	FALSE	FALSE
NM_001033457	29	4	433864	Nom1	1.7739	1	FALSE	FALSE
NM_177594	131	31	210376	Mtmr9	2.42877	1.87173	FALSE	FALSE
NM_053195	13	4	94249	Slc24a3	1.42544	1	FALSE	FALSE
NM_013762	4767	595	27367	Rpl3	3.98975	3.15489	FALSE	FALSE
NM_001034085	168	30	73699	Ppp2r1b	2.53681	1.85749	FALSE	FALSE
NM_172856	564	109	241447	Cers6	3.06278	2.4178	FALSE	FALSE
NM_001161798	49	7	17769	Mthfr	2.0017	1.22547	FALSE	FALSE
NM_023871	1214	251	56086	Set	3.39572	2.78005	FALSE	FALSE
NM_134021	109	32	103711	Pnpo	2.34893	1.88552	FALSE	FALSE
NM_029132	42	12	103268	Cep57l1	1.93475	1.45955	FALSE	FALSE
NM_009336	163	33	21427	Vps72	2.52369	1.89889	FALSE	FALSE
NM_019926	126	19	17772	Mtm1	2.41187	1.65913	FALSE	FALSE
NM_018886	808	78	56048	Lgals8	3.21891	2.27247	FALSE	FALSE
NM_026403	103	24	67842	Nop9	2.32434	1.76058	FALSE	FALSE
NM_011841	24	8	23939	Mapk7	1.69171	1.28346	FALSE	FALSE
NM_178766	36	3	319653	Slc25a40	1.8678	1	FALSE	FALSE
NM_001110211	499	45	11749	Anxa6	3.0096	2.03358	FALSE	FALSE
NM_013847	63	17	26912	Gcat	2.11084	1.61082	FALSE	FALSE
NM_028658	195	66	73825	Ppp1r21	2.60154	2.19992	FALSE	FALSE
NM_013506	427	61	13682	Eif4a2	2.94193	2.1657	FALSE	FALSE
NM_145371	248	32	209354	Eif2b1	2.70595	1.88552	FALSE	FALSE
NM_153530	76	11	208718	Dis3l2	2.19232	1.42177	FALSE	FALSE
NM_172153	31	12	209707	Lcorl	1.80286	1.45955	FALSE	FALSE
NM_025802	165	37	66853	Pnpla2	2.52899	1.94857	FALSE	FALSE
NM_007987	52	10	14102	Fas	2.0275	1.38037	FALSE	FALSE
NM_026689	95	10	68350	Mul1	2.28923	1.38037	FALSE	FALSE
NM_001256195	71	28	230861	Eif4g3	2.16276	1.82753	FALSE	FALSE
NM_138757	46	2	71177	Asun	1.97426	1	FALSE	FALSE
NM_145537	136	21	108687	Edem2	2.44504	1.70259	FALSE	FALSE
NM_009383	340	114	21843	Tial1	2.84298	2.43728	FALSE	FALSE
NM_019993	400	65	56752	Aldh9a1	2.91356	2.19329	FALSE	FALSE
NM_023538	141	24	69923	Agk	2.46072	1.76058	FALSE	FALSE
NM_025327	540	70	66059	Krtcap2	3.0439	2.22547	FALSE	FALSE
NM_001168304	61	17	78334	Cdk19	2.09683	1.61082	FALSE	FALSE
NM_001042501	60	13	68152	Fam133b	2.08965	1.49432	FALSE	FALSE
NM_026829	257	47	107885	Mthfs	2.72143	2.05247	FALSE	FALSE
NM_001243052	232	21	12036	Bcat2	2.67699	1.70259	FALSE	FALSE
NM_010631	12	10	16582	Kifc3	1.39068	1.38037	FALSE	FALSE
NM_023268	168	25	104009	Qsox1	2.53681	1.77831	FALSE	FALSE
NM_021895	833	135	60595	Actn4	3.23215	2.51071	FALSE	FALSE
NM_029653	58	7	69635	Dapk1	2.07493	1.22547	FALSE	FALSE
NM_011218	33	8	19280	Ptprs	1.83002	1.28346	FALSE	FALSE
NM_021792	64	4	60440	Iigp1	2.11768	1	FALSE	FALSE
NM_026612	381	21	68198	Ndufb2	2.89243	1.70259	FALSE	FALSE
NM_001164735	332	91	57914	Crlf2	2.83264	2.33941	FALSE	FALSE
NM_007514	62	11	11988	Slc7a2	2.10389	1.42177	FALSE	FALSE
NM_008186	81	11	14884	Gtf2h1	2.21999	1.42177	FALSE	FALSE
NM_145968	15	3	72536	Tagap	1.48759	1	FALSE	FALSE
NM_011948	18	1	26407	Map3k4	1.56677	1	FALSE	FALSE
NM_008876	20	13	18806	Pld2	1.61253	1.49432	FALSE	FALSE
NM_008717	96	19	18139	Zfml	2.29377	1.65913	FALSE	FALSE
NM_016800	107	14	53612	Vti1b	2.34089	1.5265	FALSE	FALSE
NM_001252542	69	3	78797	Ndor1	2.15035	1	FALSE	FALSE
NM_178029	12	7	233904	Setd1a	1.39068	1.22547	FALSE	FALSE
NM_001033181	15	8	77532	Jrkl	1.48759	1.28346	FALSE	FALSE
NM_139206	72	21	106952	Arap3	2.16883	1.70259	FALSE	FALSE
NM_025770	77	3	66795	Atg10	2.19799	1	FALSE	FALSE
NM_027817	110	14	71520	Grap	2.35289	1.5265	FALSE	FALSE
NM_011755	29	3	22694	Zfp35	1.7739	1	FALSE	FALSE
NM_172768	238	89	235283	Gramd1b	2.68808	2.32976	FALSE	FALSE
NM_146037	115	25	217826	Kcnk13	2.3722	1.77831	FALSE	FALSE
NM_001081122	28	0	28135	Cep63	1.75866	1	FALSE	FALSE
NM_133352	617	261	107358	Tm9sf3	3.10179	2.79701	FALSE	FALSE
NM_009088	118	14	20019	Polr1a	2.38338	1.5265	FALSE	FALSE
NM_013498	104	14	12916	Crem	2.32853	1.5265	FALSE	FALSE
NM_175268	29	4	77938	Fam53b	1.7739	1	FALSE	FALSE
NM_001080749	159	27	14886	Gtf2i	2.5129	1.81174	FALSE	FALSE
NM_024214	427	154	67952	Tomm20	2.94193	2.56789	FALSE	FALSE
NM_001013367	319	26	105787	Prkaa1	2.81529	1.79535	FALSE	FALSE
NM_133886	45	7	100317	AU040320	1.96471	1.22547	FALSE	FALSE
NM_029738	51	8	76779	Cluap1	2.01907	1.28346	FALSE	FALSE
NM_174850	55	19	231830	Micall2	2.05186	1.65913	FALSE	FALSE
NM_029068	71	19	74718	Snx16	2.16276	1.65913	FALSE	FALSE
NM_001103181	38	8	68842	Tulp4	1.89129	1.28346	FALSE	FALSE
NM_016909	193	57	53424	Tsnax	2.59706	2.13625	FALSE	FALSE
NM_029998	43	21	77877	6030458C11Rik	1.94497	1.70259	FALSE	FALSE
NM_001033350	22	5	242248	Bank1	1.65392	1.07934	FALSE	FALSE
NM_201239	1177	92	58809	Rnase4	3.38228	2.34416	FALSE	FALSE
NM_028720	569	88	74022	Glyr1	3.06661	2.32486	FALSE	FALSE
NM_024180	193	25	66844	Ormdl2	2.59706	1.77831	FALSE	FALSE
NM_144875	21	4	226422	Rab29	1.63372	1	FALSE	FALSE
NM_181278	109	48	78521	B230219D22Rik	2.34893	2.06161	FALSE	FALSE
NM_011544	74	17	21406	Tcf12	2.18073	1.61082	FALSE	FALSE
NM_024261	82	10	73419	1700052N19Rik	2.22532	1.38037	FALSE	FALSE
NM_211357	217	26	14050	Eya3	2.64796	1.79535	FALSE	FALSE
NM_008018	32	5	14218	Sh3pxd2a	1.81665	1.07934	FALSE	FALSE
NM_023480	19	3	68636	Fahd1	1.59026	1	FALSE	FALSE
NM_001242396	82	16	108829	Jmjd1c	2.22532	1.58449	FALSE	FALSE
NM_145630	66	29	236900	Pdk3	2.13105	1.84277	FALSE	FALSE
NM_011049	20	7	18555	Cdk16	1.61253	1.22547	FALSE	FALSE
NM_001177546	39	8	667666	Zfp600	1.90257	1.28346	FALSE	FALSE
NM_001172093	55	9	76131	Depdc1a	2.05186	1.33461	FALSE	FALSE
NM_009457	996	227	22201	Uba1	3.30976	2.7364	FALSE	FALSE
NM_001025779	95	39	23834	Cdc6	2.28923	1.97144	FALSE	FALSE
NM_009228	20	2	20648	Snta1	1.61253	1	FALSE	FALSE
NM_027192	31	14	69737	Ttl	1.80286	1.5265	FALSE	FALSE
NM_009097	213	49	20111	Rps6ka1	2.63988	2.07057	FALSE	FALSE
NM_016888	165	28	53625	B3gnt2	2.52899	1.82753	FALSE	FALSE
NM_175277	13	8	78653	Bola3	1.42544	1.28346	FALSE	FALSE
NM_001081355	19	14	110593	Prdm2	1.59026	1.5265	FALSE	FALSE
NM_024203	66	12	67544	Fam120b	2.13105	1.45955	FALSE	FALSE
NM_001045540	224	60	620913	Gm12185	2.66175	2.15852	FALSE	FALSE
NM_133895	131	35	100561	Slc15a4	2.42877	1.92444	FALSE	FALSE
NM_001077707	52	9	268281	Shprh	2.0275	1.33461	FALSE	FALSE
NM_001024512	12	6	105428	Fam149b	1.39068	1.15852	FALSE	FALSE
NM_029077	296	51	74735	Trim14	2.78279	2.08794	FALSE	FALSE
NM_001253848	131	23	104836	Cbll1	2.42877	1.7421	FALSE	FALSE
NM_001159317	91	30	16180	Il1rap	2.27054	1.85749	FALSE	FALSE
NM_001039150	5607	505	12505	Cd44	4.06023	3.08366	FALSE	FALSE
NM_133792	887	105	192654	Pla2g15	3.25943	2.40156	FALSE	FALSE
NM_144800	402	29	211401	Mtss1	2.91573	1.84277	FALSE	FALSE
NM_025626	40	14	66540	Fam107b	1.91356	1.5265	FALSE	FALSE
NM_021385	144	33	58186	Rad18	2.46986	1.89889	FALSE	FALSE
NM_001010825	12	2	231630	Ficd	1.39068	1	FALSE	FALSE
NM_027534	142	18	70750	Kdsr	2.46379	1.63564	FALSE	FALSE
NM_001101804_dup2	159	20	NA	NA	2.5129	1.6814	FALSE	FALSE
NM_133918	141	24	100952	Emilin1	2.46072	1.76058	FALSE	FALSE
NM_022999	26	4	65116	Prrg2	1.72647	1	FALSE	FALSE
NM_001102458	246	58	54375	Azin1	2.70244	2.1438	FALSE	FALSE
NM_001081258	34	9	381293	Kif14	1.84298	1.33461	FALSE	FALSE
NM_001039356	676	72	15361	Hmga1	3.14145	2.2377	FALSE	FALSE
NM_033575	18	4	93700	Pcdhgb2	1.56677	1	FALSE	FALSE
NM_207215	15	7	105689	Mycbp2	1.48759	1.22547	FALSE	FALSE
NM_133248	53	15	170823	Glmn	2.03578	1.55646	FALSE	FALSE
NM_016981	73	8	20544	Slc9a1	2.17482	1.28346	FALSE	FALSE
NM_146099	70	43	226178	Wbp1l	2.1566	2.01384	FALSE	FALSE
NM_027109	793	49	69537	Dnase1l1	3.21077	2.07057	FALSE	FALSE
NM_001145778	67	6	72739	Zkscan3	2.13758	1.15852	FALSE	FALSE
NM_001081144	11	0	100515	Zfp518b	1.35289	1	FALSE	FALSE
NM_027541	101	17	70767	Prpf3	2.31582	1.61082	FALSE	FALSE
NM_001033237	33	6	208146	Yeats2	1.83002	1.15852	FALSE	FALSE
NM_001113214	114	19	18286	Odf2	2.36841	1.65913	FALSE	FALSE
NM_001177405_dup2	20	0	NA	NA	1.61253	1	FALSE	FALSE
NM_009462	86	4	22224	Usp10	2.246	1	FALSE	FALSE
NM_172777	96	12	236573	Gbp9	2.29377	1.45955	FALSE	FALSE
NM_146002	27	13	215160	Rhbdd2	1.74287	1.49432	FALSE	FALSE
NM_001162939	73	27	68048	Aen	2.17482	1.81174	FALSE	FALSE
NM_172584	57	17	217837	Itpk1	2.06738	1.61082	FALSE	FALSE
NM_026195	576	84	108147	Atic	3.07192	2.30465	FALSE	FALSE
NM_145573	125	15	232536	Mrps35	2.40841	1.55646	FALSE	FALSE
NM_011368	194	40	20416	Shc1	2.5993	1.98243	FALSE	FALSE
NM_026865	28	4	73635	Ptges3l	1.75866	1	FALSE	FALSE
NM_026340	44	11	67724	Pop1	1.95495	1.42177	FALSE	FALSE
NM_025363	58	5	66117	1110001J03Rik	2.07493	1.07934	FALSE	FALSE
NM_001168469	229	47	22192	Ube2m	2.67134	2.05247	FALSE	FALSE
NM_008906	6213	1034	19025	Ctsa	4.1048	3.39489	FALSE	FALSE
NM_001190800	224	39	234733	Ddx19b	2.66175	1.97144	FALSE	FALSE
NM_025433	691	62	66229	Rpl7l1	3.15098	2.17276	FALSE	FALSE
NM_001159883	27	2	56812	Dnajb2	1.74287	1	FALSE	FALSE
NM_030116	162	18	78523	Mrpl9	2.52102	1.63564	FALSE	FALSE
NM_015801	41	7	50767	Pnpla6	1.92429	1.22547	FALSE	FALSE
NM_001136259	245	31	21968	Tom1	2.70067	1.87173	FALSE	FALSE
NM_173019	68	5	270198	Pfkfb4	2.14401	1.07934	FALSE	FALSE
NM_009145	2823	463	20320	Nptn	3.76221	3.04595	FALSE	FALSE
NM_026546	78	4	68073	Fam173b	2.2036	1	FALSE	FALSE
NM_145924	24	1	102920	Cenpi	1.69171	1	FALSE	FALSE
NM_009615	700	141	11491	Adam17	3.1566	2.52959	FALSE	FALSE
NM_028427	30	18	73067	Tmem192	1.78862	1.63564	FALSE	FALSE
NM_008753	340	289	18245	Oaz1	2.84298	2.84127	FALSE	FALSE
NM_178065	58	2	68497	Arel1	2.07493	1	FALSE	FALSE
NM_025994	2623	294	27984	Efhd2	3.7303	2.84872	FALSE	FALSE
NM_001163161	2882	350	17474	Clec4d	3.7712	2.92444	FALSE	FALSE
NM_130454	23	6	170472	Recql5	1.67323	1.15852	FALSE	FALSE
NM_011221	121	16	19291	Purb	2.39429	1.58449	FALSE	FALSE
NM_001199205	152	74	70834	Spag9	2.49335	2.2496	FALSE	FALSE
NM_134151	161	40	107271	Yars	2.51833	1.98243	FALSE	FALSE
NM_028243	528	102	72461	Prcp	3.03414	2.38897	FALSE	FALSE
NM_001159595	66	25	72656	Ints8	2.13105	1.77831	FALSE	FALSE
NM_145951	52	7	209224	Enox2	2.0275	1.22547	FALSE	FALSE
NM_011971	1704	133	26446	Psmb3	3.54297	2.50422	FALSE	FALSE
NM_001083887	14	7	230577	Pars2	1.45763	1.22547	FALSE	FALSE
NM_007763	2420	193	12925	Crip1	3.69532	2.66593	FALSE	FALSE
NM_173873	73	6	12725	Clcn3	2.17482	1.15852	FALSE	FALSE
NM_170591	194	17	71844	Nupl1	2.5993	1.61082	FALSE	FALSE
NM_011672	539	57	22230	Ufd1l	3.04309	2.13625	FALSE	FALSE
NM_008520	38	20	16998	Ltbp3	1.89129	1.6814	FALSE	FALSE
NM_001037758	62	12	12234	Btrc	2.10389	1.45955	FALSE	FALSE
NM_001110192	938	189	16331	Inpp5d	3.2837	2.65683	FALSE	FALSE
NM_028614	168	30	73699	Ppp2r1b	2.53681	1.85749	FALSE	FALSE
NM_025486	231	14	66320	Tmem208	2.67511	1.5265	FALSE	FALSE
NM_001039239	52	31	630579	Zfp808	2.0275	1.87173	FALSE	FALSE
NM_001198912	349	71	16800	Arhgef2	2.85433	2.23163	FALSE	FALSE
NM_173374	860	111	110809	Srsf1	3.246	2.4257	FALSE	FALSE
NM_010860	6112	381	17904	Myl6	4.09768	2.9613	FALSE	FALSE
NM_010561	142	13	16201	Ilf3	2.46379	1.49432	FALSE	FALSE
NM_001161369	268	39	268996	Ss18	2.73964	1.97144	FALSE	FALSE
NM_153152	343	22	224904	2410015M20Rik	2.8468	1.7228	FALSE	FALSE
NM_019456	1348	328	54519	Apbb1ip	3.44119	2.89625	FALSE	FALSE
NM_153783	65	13	212503	Paox	2.12441	1.49432	FALSE	FALSE
NM_029701	671	81	76687	Spcs3	3.13822	2.28886	FALSE	FALSE
NM_001130150	202	73	16801	Arhgef1	2.61685	2.2437	FALSE	FALSE
NM_001205173	49	23	212632	Iffo2	2.0017	1.7421	FALSE	FALSE
NM_027462	21	6	70560	Wars2	1.63372	1.15852	FALSE	FALSE
NM_008054	92	8	14360	Fyn	2.27529	1.28346	FALSE	FALSE
NM_001253862	74	17	21406	Tcf12	2.18073	1.61082	FALSE	FALSE
NM_011179	26752	3578	19156	Psap	4.73886	3.93401	FALSE	FALSE
NM_001159331	37	3	67768	N6amt1	1.8797	1	FALSE	FALSE
NM_009787	900	172	12304	Pdia4	3.26574	2.6159	FALSE	FALSE
NM_027156	37	8	69663	Ddx51	1.8797	1.28346	FALSE	FALSE
NM_030714	11	3	80904	Dtx3	1.35289	1	FALSE	FALSE
NM_021499	44	6	59002	Wrap73	1.95495	1.15852	FALSE	FALSE
NM_026744	61	14	68499	Mrpl53	2.09683	1.5265	FALSE	FALSE
NM_053177	106	31	94178	Mcoln1	2.33681	1.87173	FALSE	FALSE
NM_001242943	89	5	100190996	Gm14436	2.26089	1.07934	FALSE	FALSE
NM_133932	80	30	101206	Tada3	2.21459	1.85749	FALSE	FALSE
NM_018868	315	66	55989	Nop58	2.80981	2.19992	FALSE	FALSE
NM_001024952	27	4	381305	Rc3h1	1.74287	1	FALSE	FALSE
NM_001085500	83	8	217149	Cisd3	2.23058	1.28346	FALSE	FALSE
NM_008021	28	11	14235	Foxm1	1.75866	1.42177	FALSE	FALSE
NM_001042620	443	76	13204	Dhx15	2.95791	2.26119	FALSE	FALSE
NM_178788	22	2	320685	Dctd	1.65392	1	FALSE	FALSE
NM_144549	151	46	211770	Trib1	2.49048	2.04313	FALSE	FALSE
NM_172724	37	4	231841	Brat1	1.8797	1	FALSE	FALSE
NM_146073	65	32	224454	Zdhhc14	2.12441	1.88552	FALSE	FALSE
NM_001109972	1421	88	20335	Sec61g	3.4641	2.32486	FALSE	FALSE
NM_153592	350	58	244373	Erlin2	2.85557	2.1438	FALSE	FALSE
NM_021402	149	62	140499	Ube2j2	2.48469	2.17276	FALSE	FALSE
NM_133756	196	27	74254	Gpn1	2.60376	1.81174	FALSE	FALSE
NM_001164072	246	34	21353	Tank	2.70244	1.91185	FALSE	FALSE
NM_025518	65	6	66369	Dus2	2.12441	1.15852	FALSE	FALSE
NM_133697	159	19	68552	Smim14	2.5129	1.65913	FALSE	FALSE
NM_175224	307	32	75624	Metap1	2.79864	1.88552	FALSE	FALSE
NM_001251833	28	0	93681	Zkscan8	1.75866	1	FALSE	FALSE
NM_026007	2420	205	67160	Eef1g	3.69532	2.69213	FALSE	FALSE
NM_008638	240	36	17768	Mthfd2	2.69171	1.93667	FALSE	FALSE
NM_001170851	70	5	16633	Klra2	2.1566	1.07934	FALSE	FALSE
NM_008898	2217	307	18984	Por	3.65727	2.86751	FALSE	FALSE
NM_001163770	39	21	112403	Dxo	1.90257	1.70259	FALSE	FALSE
NM_001082974	29	3	415115	Neurl2	1.7739	1	FALSE	FALSE
NM_175251	29	12	77044	Arid2	1.7739	1.45955	FALSE	FALSE
NM_011580	1519	118	21825	Thbs1	3.49306	2.45225	FALSE	FALSE
NM_007644	733	151	12492	Scarb2	3.17661	2.55935	FALSE	FALSE
NM_145436	168	42	217232	Cdc27	2.53681	2.00362	FALSE	FALSE
NM_026520	30	5	68034	Fam122a	1.78862	1.07934	FALSE	FALSE
NM_153196	74	6	71336	Rbks	2.18073	1.15852	FALSE	FALSE
NM_001085492	19	3	68703	Rere	1.59026	1	FALSE	FALSE
NM_001025263	888	70	21985	Tpd52	3.25991	2.22547	FALSE	FALSE
NM_001161765	34	6	14263	Fmo5	1.84298	1.15852	FALSE	FALSE
NM_153057	164	38	211548	Nomo1	2.52635	1.96016	FALSE	FALSE
NM_001110853	61	9	12916	Crem	2.09683	1.33461	FALSE	FALSE
NM_001164227	77	5	18181	Nrf1	2.19799	1.07934	FALSE	FALSE
NM_011603	70	6	237336	Tbpl1	2.1566	1.15852	FALSE	FALSE
NM_015759	286	26	30938	Fgd3	2.76787	1.79535	FALSE	FALSE
NM_146194	2167	703	233489	Picalm	3.64736	3.22733	FALSE	FALSE
NM_172391	164	44	268390	Ahsa2	2.52635	2.02383	FALSE	FALSE
NM_007631	3445	331	12443	Ccnd1	3.84869	2.9002	FALSE	FALSE
NM_145483	24	4	224585	Zfp160	1.69171	1	FALSE	FALSE
NM_018730	1288	103	54217	Rpl36	3.42142	2.39321	FALSE	FALSE
NM_133198	261	47	110095	Pygl	2.72814	2.05247	FALSE	FALSE
NM_001163301	131	9	19302	Pex2	2.42877	1.33461	FALSE	FALSE
NM_011489	100	30	20851	Stat5b	2.3115	1.85749	FALSE	FALSE
NM_028782	84	10	74142	Lonp1	2.23578	1.38037	FALSE	FALSE
NM_001163019	67	15	97159	A430005L14Rik	2.13758	1.55646	FALSE	FALSE
NM_144897	393	77	246703	Apoa1bp	2.90589	2.26686	FALSE	FALSE
NM_146200	1200	152	56347	Eif3c	3.39068	2.56222	FALSE	FALSE
NM_001136062	20	1	13808	Eno3	1.61253	1	FALSE	FALSE
NM_019737	164	50	56386	B4galt6	2.52635	2.07934	FALSE	FALSE
NM_001146296	185	44	56417	Adar	2.57867	2.02383	FALSE	FALSE
NM_145609	207	19	78100	Msantd4	2.62747	1.65913	FALSE	FALSE
NM_001177627	178	14	227659	Slc2a6	2.56192	1.5265	FALSE	FALSE
NM_007455	134	15	11766	Ap1g2	2.43861	1.55646	FALSE	FALSE
NM_016677	699	56	53602	Hpcal1	3.15598	2.12856	FALSE	FALSE
NM_028126	95	5	72149	Strada	2.28923	1.07934	FALSE	FALSE
NM_010774	35	2	17193	Mbd4	1.85557	1	FALSE	FALSE
NM_029491	113	13	75964	Trappc8	2.36458	1.49432	FALSE	FALSE
NM_177730	71	16	242291	Impad1	2.16276	1.58449	FALSE	FALSE
NM_023422	21828	1688	68024	Hist1h2bc	4.65052	3.60774	FALSE	FALSE
NM_009578	184	59	22778	Ikzf1	2.57632	2.15122	FALSE	FALSE
NM_030084	222	19	78308	Gpr108	2.65785	1.65913	FALSE	FALSE
NM_011342	399	60	20333	Sec22b	2.91247	2.15852	FALSE	FALSE
NM_001085409	215	26	68428	Steap3	2.64394	1.79535	FALSE	FALSE
NM_001146223	201	19	66310	Dpy30	2.6147	1.65913	FALSE	FALSE
NM_001080389	95	17	13728	Mark2	2.28923	1.61082	FALSE	FALSE
NM_023646	192	27	83945	Dnaja3	2.5948	1.81174	FALSE	FALSE
NM_028193	30	9	72308	Brf1	1.78862	1.33461	FALSE	FALSE
NM_008960	77	44	19211	Pten	2.19799	2.02383	FALSE	FALSE
NM_001025586	106	12	75692	Nr2c2ap	2.33681	1.45955	FALSE	FALSE
NM_008379	810	122	16211	Kpnb1	3.21999	2.46673	FALSE	FALSE
NM_001123386	42	12	12593	Cdyl	1.93475	1.45955	FALSE	FALSE
NM_001035526	45	7	100317	AU040320	1.96471	1.22547	FALSE	FALSE
NM_145426	501	77	216760	Mfap3	3.01134	2.26686	FALSE	FALSE
NM_001037810	88	16	20737	Spn	2.25598	1.58449	FALSE	FALSE
NM_001163360	212	63	60530	Fignl1	2.63784	2.17971	FALSE	FALSE
NM_022880	205	52	63959	Slc29a1	2.62326	2.09638	FALSE	FALSE
NM_001163430	40	3	50721	Sirt6	1.91356	1	FALSE	FALSE
NM_001110498	897	103	15976	Ifnar2	3.26429	2.39321	FALSE	FALSE
NM_001164109	76	24	18018	Nfatc1	2.19232	1.76058	FALSE	FALSE
NM_010492	33	3	15893	Ica1	1.83002	1	FALSE	FALSE
NM_001001983	88	25	224020	Pi4ka	2.25598	1.77831	FALSE	FALSE
NM_001037717	81	15	625098	Slc38a6	2.21999	1.55646	FALSE	FALSE
NM_001172069	71	5	71599	Senp8	2.16276	1.07934	FALSE	FALSE
NM_145138	113	23	217718	Nek9	2.36458	1.7421	FALSE	FALSE
NM_145220	198	24	216190	Appl2	2.60817	1.76058	FALSE	FALSE
NM_001024854	67	6	30056	Timm9	2.13758	1.15852	FALSE	FALSE
NM_010236	34	6	14287	Fpgs	1.84298	1.15852	FALSE	FALSE
NM_028792	12	0	74158	Josd1	1.39068	1	FALSE	FALSE
NM_178589	39	7	94185	Tnfrsf21	1.90257	1.22547	FALSE	FALSE
NM_021364	448	48	23845	Clec5a	2.96278	2.06161	FALSE	FALSE
NM_011327	186	23	20280	Scp2	2.58101	1.7421	FALSE	FALSE
NM_001252615	26	5	53618	Fut8	1.72647	1.07934	FALSE	FALSE
NM_028385	23	7	72895	Setd5	1.67323	1.22547	FALSE	FALSE
NM_001040395	11	14	68646	Nadk2	1.35289	1.5265	FALSE	FALSE
NM_010478	40	5	15511	Hspa1b	1.91356	1.07934	FALSE	FALSE
NM_001037762	77	19	66220	Zdhhc12	2.19799	1.65913	FALSE	FALSE
NM_028136	149	33	72162	Dhx36	2.48469	1.89889	FALSE	FALSE
NM_201391	730	128	18810	Plec	3.17482	2.48758	FALSE	FALSE
NM_010760	406	48	17149	Magoh	2.92003	2.06161	FALSE	FALSE
NM_027999	59	6	71909	Haus5	2.08235	1.15852	FALSE	FALSE
NM_008400	130	22	16408	Itgal	2.42544	1.7228	FALSE	FALSE
NM_138303	43	10	74766	Yipf2	1.94497	1.38037	FALSE	FALSE
NM_011293	221	33	20022	Polr2j	2.65589	1.89889	FALSE	FALSE
NM_027739	89	19	14421	B4galnt1	2.26089	1.65913	FALSE	FALSE
NM_001033960	107	13	227800	Rabgap1	2.34089	1.49432	FALSE	FALSE
NM_027201	42	13	69752	Zfp511	1.93475	1.49432	FALSE	FALSE
NM_009564	13	2	22722	Zfp64	1.42544	1	FALSE	FALSE
NM_001012305	16	12	277468	Slc39a12	1.51562	1.45955	FALSE	FALSE
NM_001033308	379	55	230787	Themis2	2.89014	2.12074	FALSE	FALSE
NM_028778	67	16	74137	Nuak2	2.13758	1.58449	FALSE	FALSE
NM_001168668	80	22	67726	Fam114a2	2.21459	1.7228	FALSE	FALSE
NM_001161847	541	78	20393	Sgk1	3.0447	2.27247	FALSE	FALSE
NM_175645	100	43	233781	Xylt1	2.3115	2.01384	FALSE	FALSE
NM_001163485	2534	161	19946	Rpl30	3.71531	2.5872	FALSE	FALSE
NM_001168220	97	30	66356	Knop1	2.29827	1.85749	FALSE	FALSE
NM_001102611	20	2	319822	Smyd4	1.61253	1	FALSE	FALSE
NM_001081011	262	19	14270	Srgap2	2.7298	1.65913	FALSE	FALSE
NM_146135	57	20	229615	Pias3	2.06738	1.6814	FALSE	FALSE
NM_001081309	59	25	75669	Pik3r4	2.08235	1.77831	FALSE	FALSE
NM_178633	24	10	77113	Klhl2	1.69171	1.38037	FALSE	FALSE
NM_001256130	157	27	93790	Nipa2	2.5074	1.81174	FALSE	FALSE
NM_172882	45	5	72145	Wdfy3	1.96471	1.07934	FALSE	FALSE
NM_009119	1088	124	20220	Sap18	3.34813	2.47379	FALSE	FALSE
NM_019873	35	2	56299	Fkbpl	1.85557	1	FALSE	FALSE
NM_019679	458	48	57778	Fmnl1	2.97237	2.06161	FALSE	FALSE
NM_008848	429	83	18729	Pira6	2.94396	2.29945	FALSE	FALSE
NM_028521	50	4	73373	Phospho2	2.01047	1	FALSE	FALSE
NM_022332	24	4	64213	St7	1.69171	1	FALSE	FALSE
NM_026174	37	6	67464	Entpd4	1.8797	1.15852	FALSE	FALSE
NM_025557	96	7	66425	Pcp4l1	2.29377	1.22547	FALSE	FALSE
NM_016876	754	88	53356	Eif3g	3.18887	2.32486	FALSE	FALSE
NM_001252574	46	13	228875	Slc35c2	1.97426	1.49432	FALSE	FALSE
NM_030560	120	14	80744	Cwc22	2.39068	1.5265	FALSE	FALSE
NM_030678	120	45	14936	Gys1	2.39068	2.03358	FALSE	FALSE
NM_001141975	416	60	72119	Tpx2	2.93059	2.15852	FALSE	FALSE
NM_027379	628	77	67420	Far1	3.10946	2.26686	FALSE	FALSE
NM_029632	167	16	76497	Ppp1r11	2.53422	1.58449	FALSE	FALSE
NM_177993	353	70	73389	Hbp1	2.85928	2.22547	FALSE	FALSE
NM_026040	79	12	67222	Srfbp1	2.20913	1.45955	FALSE	FALSE
NM_008677	1021	115	17972	Ncf4	3.32053	2.44107	FALSE	FALSE
NM_019565	24	7	56220	Zfp386	1.69171	1.22547	FALSE	FALSE
NM_009775	1496	140	12257	Tspo	3.48643	2.5265	FALSE	FALSE
NM_023331	183	15	67308	Mrpl46	2.57395	1.55646	FALSE	FALSE
NM_177852	34	10	23856	Dido1	1.84298	1.38037	FALSE	FALSE
NM_013754	61	12	27356	Insl6	2.09683	1.45955	FALSE	FALSE
NM_181589	165	42	70466	Ckap2l	2.52899	2.00362	FALSE	FALSE
NM_025522	302	58	66375	Dhrs7	2.79151	2.1438	FALSE	FALSE
NM_178084	93	14	65964	Zak	2.27998	1.5265	FALSE	FALSE
NM_001025156	144	18	70829	Ccdc93	2.46986	1.63564	FALSE	FALSE
NM_026417	274	45	67864	Yipf4	2.74925	2.03358	FALSE	FALSE
NM_011851	80	7	23959	Nt5e	2.21459	1.22547	FALSE	FALSE
NM_001033537	30	5	320655	Pgap3	1.78862	1.07934	FALSE	FALSE
NM_001110201	346	73	77254	Yif1b	2.85058	2.2437	FALSE	FALSE
NM_001113356	20	2	667277	C1rb	1.61253	1	FALSE	FALSE
NM_008602	20	1	17344	Pias2	1.61253	1	FALSE	FALSE
NM_013538	129	74	14793	Cdca3	2.42209	2.2496	FALSE	FALSE
NM_031181	24	6	83382	Siglece	1.69171	1.15852	FALSE	FALSE
NM_145361	50	9	208198	Btbd2	2.01047	1.33461	FALSE	FALSE
NM_001159574	169	41	66899	Fip1l1	2.53939	1.99316	FALSE	FALSE
NM_177364	181	52	268396	Sh3pxd2b	2.56918	2.09638	FALSE	FALSE
NM_008152	317	24	14744	Gpr65	2.81256	1.76058	FALSE	FALSE
NM_001128170	78	12	74256	Cyld	2.2036	1.45955	FALSE	FALSE
NM_001253700	135	20	54351	Elp5	2.44184	1.6814	FALSE	FALSE
NM_198622	15	3	243529	H1fx	1.48759	1	FALSE	FALSE
NM_080556	1335	274	68059	Tm9sf2	3.43698	2.81812	FALSE	FALSE
NM_030692	424	93	83493	Sacm1l	2.93887	2.34886	FALSE	FALSE
NM_133665	90	17	17261	Mef2d	2.26574	1.61082	FALSE	FALSE
NM_026963	69	12	69151	Lzic	2.15035	1.45955	FALSE	FALSE
NM_009397	67	27	21929	Tnfaip3	2.13758	1.81174	FALSE	FALSE
NM_177470	232	19	52538	Acaa2	2.67699	1.65913	FALSE	FALSE
NM_001243064	81	7	12389	Cav1	2.21999	1.22547	FALSE	FALSE
NM_172132	61	8	193796	Kdm4b	2.09683	1.28346	FALSE	FALSE
NM_019770	625	215	56334	Tmed2	3.10738	2.71281	FALSE	FALSE
NM_001025431	15	3	228662	Btbd3	1.48759	1	FALSE	FALSE
NM_001199004	58	32	27277	Golga5	2.07493	1.88552	FALSE	FALSE
NM_011521	1116	116	20971	Sdc4	3.35917	2.44483	FALSE	FALSE
NM_133852	151	32	99412	Golga2	2.49048	1.88552	FALSE	FALSE
NM_134471	204	36	73804	Kif2c	2.62113	1.93667	FALSE	FALSE
NM_001081392	31	5	100019	Mdn1	1.80286	1.07934	FALSE	FALSE
NM_025706	316	42	66687	Tbc1d15	2.81119	2.00362	FALSE	FALSE
NM_010913	511	87	18044	Nfya	3.01992	2.31989	FALSE	FALSE
NM_027748	13	2	209361	Taf3	1.42544	1	FALSE	FALSE
NM_027270	155	19	69940	Exoc1	2.50183	1.65913	FALSE	FALSE
NM_009537	216	67	22632	Yy1	2.64596	2.20645	FALSE	FALSE
NM_026273	28	34	67609	4930453N24Rik	1.75866	1.91185	FALSE	FALSE
NM_001033713	650	135	17258	Mef2a	3.12441	2.51071	FALSE	FALSE
NM_001164192	126	19	17772	Mtm1	2.41187	1.65913	FALSE	FALSE
NM_001205053	12	6	81703	Jdp2	1.39068	1.15852	FALSE	FALSE
NM_027977	260	45	71881	Apmap	2.72647	2.03358	FALSE	FALSE
NM_001081378	106	12	77480	Kidins220	2.33681	1.45955	FALSE	FALSE
NM_001045525	19	3	327951	Cyb5d1	1.59026	1	FALSE	FALSE
NM_001004140	130	43	80986	Ckap2	2.42544	2.01384	FALSE	FALSE
NM_001079830	37	10	94093	Trim33	1.8797	1.38037	FALSE	FALSE
NM_007683	119	24	12617	Cenpc1	2.38705	1.76058	FALSE	FALSE
NM_001164314	357	63	22375	Wars	2.86417	2.17971	FALSE	FALSE
NM_009542	16	6	22643	Zfp101	1.51562	1.15852	FALSE	FALSE
NM_001012363	19	7	117591	Slc2a9	1.59026	1.22547	FALSE	FALSE
NM_001033326	66	15	236082	Dhrsx	2.13105	1.55646	FALSE	FALSE
NM_013923	44	5	30945	Rnf19a	1.95495	1.07934	FALSE	FALSE
NM_028756	118	18	74102	Slc35a5	2.38338	1.63564	FALSE	FALSE
NM_001159967	11	0	78255	Ralgps2	1.35289	1	FALSE	FALSE
NM_001001176	113	9	407786	Taf9b	2.36458	1.33461	FALSE	FALSE
NM_029423	19	8	75767	Rab11fip1	1.59026	1.28346	FALSE	FALSE
NM_146153	329	105	230753	Thrap3	2.8287	2.40156	FALSE	FALSE
NM_025283	486	46	19070	Mob4	2.99814	2.04313	FALSE	FALSE
NM_138956	91	42	192678	Rassf3	2.27054	2.00362	FALSE	FALSE
NM_001039180	134	19	76895	Bicd2	2.43861	1.65913	FALSE	FALSE
NM_001204915	207	95	28193	Reep3	2.62747	2.3581	FALSE	FALSE
NM_001146084	48	6	380601	Fastkd5	1.99274	1.15852	FALSE	FALSE
NM_021337	115	16	108077	Skiv2l	2.3722	1.58449	FALSE	FALSE
NM_011396	37	8	20520	Slc22a5	1.8797	1.28346	FALSE	FALSE
NM_134040	345	58	104721	Ddx1	2.84932	2.1438	FALSE	FALSE
NM_029157	395	58	75062	Sf3a3	2.9081	2.1438	FALSE	FALSE
NM_178893	166	44	107684	Coro2a	2.53161	2.02383	FALSE	FALSE
NM_172622	21	7	224829	Trerf1	1.63372	1.22547	FALSE	FALSE
NM_198011	12	4	101604	E430018J23Rik	1.39068	1	FALSE	FALSE
NM_152817	84	7	74196	Ttc27	2.23578	1.22547	FALSE	FALSE
NM_021526	1260	163	59029	Psmd14	3.41187	2.59256	FALSE	FALSE
NM_009832	162	13	12454	Ccnk	2.52102	1.49432	FALSE	FALSE
NM_009713	86	18	11883	Arsa	2.246	1.63564	FALSE	FALSE
NM_001128080	26	4	27027	Tspan32	1.72647	1	FALSE	FALSE
NM_177337	102	6	219144	Arl11	2.3201	1.15852	FALSE	FALSE
NM_199302	45	7	227738	Lrsam1	1.96471	1.22547	FALSE	FALSE
NM_183046	100	17	240641	Kif20b	2.3115	1.61082	FALSE	FALSE
NM_001033155	113	29	70604	Dnajb14	2.36458	1.84277	FALSE	FALSE
NM_172569	34	8	217331	Unk	1.84298	1.28346	FALSE	FALSE
NM_007711	81	7	12725	Clcn3	2.21999	1.22547	FALSE	FALSE
NM_019936	191	20	56724	Cript	2.59253	1.6814	FALSE	FALSE
NM_026325	179	34	67706	Tmem179b	2.56435	1.91185	FALSE	FALSE
NM_178776	11	1	320135	BC049715	1.35289	1	FALSE	FALSE
NM_194257	69	19	109229	Fam118b	2.15035	1.65913	FALSE	FALSE
NM_020042	67	6	56738	Mocs1	2.13758	1.15852	FALSE	FALSE
NM_001165995	54	7	76688	Arfrp1	2.0439	1.22547	FALSE	FALSE
NM_001104529	49	1	64095	Gpr35	2.0017	1	FALSE	FALSE
NM_001142923	150	31	21416	Tcf7l2	2.48759	1.87173	FALSE	FALSE
NM_172415	19	2	72754	Arhgef10l	1.59026	1	FALSE	FALSE
NM_001161410	155	19	217449	Trappc12	2.50183	1.65913	FALSE	FALSE
NM_001163531	75	4	72392	Tmem175	2.18656	1	FALSE	FALSE
NM_015824	187	41	50793	Orc3	2.58334	1.99316	FALSE	FALSE
NM_001159552	317	44	14950	H13	2.81256	2.02383	FALSE	FALSE
NM_177342	21	6	226182	Taf5	1.63372	1.15852	FALSE	FALSE
NM_025812	165	32	66867	Hmg20a	2.52899	1.88552	FALSE	FALSE
NM_001077696	76	3	15184	Hdac5	2.19232	1	FALSE	FALSE
NM_026677	90	13	68328	Rab13	2.26574	1.49432	FALSE	FALSE
NM_029571	29	9	100087	Kti12	1.7739	1.33461	FALSE	FALSE
NM_020266	20	2	56812	Dnajb2	1.61253	1	FALSE	FALSE
NM_026127	45	3	67392	4833420G17Rik	1.96471	1	FALSE	FALSE
NM_145501	303	62	84095	Pi4k2a	2.79294	2.17276	FALSE	FALSE
NM_026390	385	84	67812	Ubxn4	2.89696	2.30465	FALSE	FALSE
NM_023524	42	8	69714	Tfpt	1.93475	1.28346	FALSE	FALSE
NM_020491	127	8	56390	Sssca1	2.41531	1.28346	FALSE	FALSE
NM_025311	107	8	66039	Tmem254a	2.34089	1.28346	FALSE	FALSE
NM_175115	29	4	67143	Ikzf5	1.7739	1	FALSE	FALSE
NM_025979	94	19	67121	Mastl	2.28463	1.65913	FALSE	FALSE
NM_011895	94	9	24060	Slc35a1	2.28463	1.33461	FALSE	FALSE
NM_025441	142	19	66244	Nemf	2.46379	1.65913	FALSE	FALSE
NM_009847	122	16	12488	Cd2ap	2.39786	1.58449	FALSE	FALSE
NM_001252493	61	40	64291	Osbpl1a	2.09683	1.98243	FALSE	FALSE
NM_001143689	2421	339	15015	H2-Q4	3.6955	2.91057	FALSE	FALSE
NM_026602	252	38	68183	Bcas2	2.7129	1.96016	FALSE	FALSE
NM_001252202	83	34	26921	Map4k4	2.23058	1.91185	FALSE	FALSE
NM_008866	417	54	18777	Lypla1	2.93164	2.11277	FALSE	FALSE
NM_001252552	14	2	14275	Folr1	1.45763	1	FALSE	FALSE
NM_175357	195	20	58799	Crbn	2.60154	1.6814	FALSE	FALSE
NM_012010	1231	175	26905	Eif2s3x	3.40176	2.62341	FALSE	FALSE
NM_001101430	87	13	69666	Psmg4	2.25102	1.49432	FALSE	FALSE
NM_001161739	53	15	170823	Glmn	2.03578	1.55646	FALSE	FALSE
NM_001252192	15	3	14048	Eya1	1.48759	1	FALSE	FALSE
NM_001042421	62	8	208628	Kntc1	2.10389	1.28346	FALSE	FALSE
NM_177038	113	13	75964	Trappc8	2.36458	1.49432	FALSE	FALSE
NM_028222	153	20	72391	Cdkn3	2.49619	1.6814	FALSE	FALSE
NM_001163557	16	4	19024	Ppfibp2	1.51562	1	FALSE	FALSE
NM_177320	135	36	320207	Pik3r5	2.44184	1.93667	FALSE	FALSE
NM_025870	17	4	66962	Swsap1	1.54195	1	FALSE	FALSE
NM_026592	54	4	68170	B230118H07Rik	2.0439	1	FALSE	FALSE
NM_001033472	52	7	382252	A830080D01Rik	2.0275	1.22547	FALSE	FALSE
NM_010269	59	11	14547	Gdap2	2.08235	1.42177	FALSE	FALSE
NM_183033	18	8	329003	Zfp516	1.56677	1.28346	FALSE	FALSE
NM_172833	62	14	240354	Malt1	2.10389	1.5265	FALSE	FALSE
NM_153164	44	10	234594	Cnot1	1.95495	1.38037	FALSE	FALSE
NM_172262	23	5	218214	Kdm1b	1.67323	1.07934	FALSE	FALSE
NM_145567	258	33	58875	Hibadh	2.72312	1.89889	FALSE	FALSE
NM_001252585	209	16	228880	Zmynd8	2.63165	1.58449	FALSE	FALSE
NM_026875	33	22	66090	Ypel3	1.83002	1.7228	FALSE	FALSE
NM_009353	59	16	21750	Terf2	2.08235	1.58449	FALSE	FALSE
NM_019943	21	10	56522	Papolb	1.63372	1.38037	FALSE	FALSE
NM_001160040	415	45	227197	Ndufs1	2.92955	2.03358	FALSE	FALSE
NM_207634	3589	269	20088	Rps24	3.86647	2.81012	FALSE	FALSE
NM_025377	141	6	66140	Ska2	2.46072	1.15852	FALSE	FALSE
NM_175483	17	1	235406	Snx33	1.54195	1	FALSE	FALSE
NM_001165986	445	77	74383	Ubap2l	2.95986	2.26686	FALSE	FALSE
NM_013862	24	5	29809	Rabgap1l	1.69171	1.07934	FALSE	FALSE
NM_025427	11	0	66214	Rgcc	1.35289	1	FALSE	FALSE
NM_013563	1593	282	16186	Il2rg	3.51372	2.83062	FALSE	FALSE
NM_172406	34	6	70827	Trak2	1.84298	1.15852	FALSE	FALSE
NM_015811	1977	276	50778	Rgs1	3.60751	2.82128	FALSE	FALSE
NM_018782	410	54	54598	Calcrl	2.92429	2.11277	FALSE	FALSE
NM_001122873	236	27	69459	Ubl7	2.68441	1.81174	FALSE	FALSE
NM_026660	179	37	68294	Mfsd10	2.56435	1.94857	FALSE	FALSE
NM_001252260	3210	345	18148	Npm1	3.81801	2.91819	FALSE	FALSE
NM_009155	1282	200	20363	Sepp1	3.41939	2.6814	FALSE	FALSE
NM_026578	98	16	68147	Gar1	2.30273	1.58449	FALSE	FALSE
NM_019635	250	45	56274	Stk3	2.70944	2.03358	FALSE	FALSE
NM_173441	112	25	73473	Iws1	2.36072	1.77831	FALSE	FALSE
NM_026130	503	217	67398	Srpr	3.01307	2.71683	FALSE	FALSE
NM_145512	167	12	108735	Sft2d2	2.53422	1.45955	FALSE	FALSE
NM_025593	252	22	66491	Polr2l	2.7129	1.7228	FALSE	FALSE
NM_001252530	291	28	101488	Slco2b1	2.77539	1.82753	FALSE	FALSE
NM_025302	196	31	27398	Mrpl2	2.60376	1.87173	FALSE	FALSE
NM_175106	32	0	66343	Tmem177	1.81665	1	FALSE	FALSE
NM_172288	109	18	234865	Nup133	2.34893	1.63564	FALSE	FALSE
NM_007481	601	115	11845	Arf6	3.09038	2.44107	FALSE	FALSE
NM_172958	33	9	268783	Mtmr12	1.83002	1.33461	FALSE	FALSE
NM_177782	113	38	277360	Prex1	2.36458	1.96016	FALSE	FALSE
NM_011886	177	40	24045	Scamp3	2.55947	1.98243	FALSE	FALSE
NM_031156	248	77	15925	Ide	2.70595	2.26686	FALSE	FALSE
NM_027335	255	38	70153	2210016F16Rik	2.71804	1.96016	FALSE	FALSE
NM_013888	112	10	30045	Dnajc12	2.36072	1.38037	FALSE	FALSE
NM_011231	196	18	19352	Rabggtb	2.60376	1.63564	FALSE	FALSE
NM_178408	144	22	215705	Arrdc1	2.46986	1.7228	FALSE	FALSE
NM_134141	184	24	109006	Ciapin1	2.57632	1.76058	FALSE	FALSE
NM_178930	102	17	107338	Gbf1	2.3201	1.61082	FALSE	FALSE
NM_145479	37	6	224023	Klhl22	1.8797	1.15852	FALSE	FALSE
NM_018768	308	22	55943	Stx8	2.80005	1.7228	FALSE	FALSE
NM_007948	115	16	13870	Ercc1	2.3722	1.58449	FALSE	FALSE
NM_145941	306	33	208643	Eif4g1	2.79722	1.89889	FALSE	FALSE
NM_011961	33	6	26432	Plod2	1.83002	1.15852	FALSE	FALSE
NM_019680	141	23	56501	Elf4	2.46072	1.7421	FALSE	FALSE
NM_008813	69	9	18605	Enpp1	2.15035	1.33461	FALSE	FALSE
NM_013710	39	6	26382	Fgd2	1.90257	1.15852	FALSE	FALSE
NM_008732	78	18	18174	Slc11a2	2.2036	1.63564	FALSE	FALSE
NM_010122	83	13	13667	Eif2b4	2.23058	1.49432	FALSE	FALSE
NM_001167885	30	6	225888	Suv420h1	1.78862	1.15852	FALSE	FALSE
NM_173867	231	50	108911	Rcc2	2.67511	2.07934	FALSE	FALSE
NM_152800	98	21	30933	Tor2a	2.30273	1.70259	FALSE	FALSE
NM_001079904	11	6	58887	Repin1	1.35289	1.15852	FALSE	FALSE
NM_001037937	36	9	97998	Deptor	1.8678	1.33461	FALSE	FALSE
NM_001005864	35	4	102103	Mtus1	1.85557	1	FALSE	FALSE
NM_175511	40	9	241303	Fam78a	1.91356	1.33461	FALSE	FALSE
NM_001163706	129	18	50762	Fbxo6	2.42209	1.63564	FALSE	FALSE
NM_199221	800	246	217304	Cd300lb	3.21459	2.77131	FALSE	FALSE
NM_016894	11	4	51801	Ramp1	1.35289	1	FALSE	FALSE
NM_001093760	303	20	66975	Trappc13	2.79294	1.6814	FALSE	FALSE
NM_019468	244	38	14380	G6pd2	2.69889	1.96016	FALSE	FALSE
NM_009498	293	22	22319	Vamp3	2.77837	1.7228	FALSE	FALSE
NM_029711	6383	1246	76709	Arpc2	4.11653	3.47589	FALSE	FALSE
NM_001177750	63	5	100038538	Gm10767	2.11084	1.07934	FALSE	FALSE
NM_001114087	45	9	67399	Pdlim7	1.96471	1.33461	FALSE	FALSE
NM_153403	26	9	236511	Ago1	1.72647	1.33461	FALSE	FALSE
NM_027168	74	5	69692	Hddc2	2.18073	1.07934	FALSE	FALSE
NM_025636	136	17	66566	Ntpcr	2.44504	1.61082	FALSE	FALSE
NM_001253920	74	9	67605	Akt1s1	2.18073	1.33461	FALSE	FALSE
NM_011015	21	9	18392	Orc1	1.63372	1.33461	FALSE	FALSE
NM_001102444	303	81	11518	Add1	2.79294	2.28886	FALSE	FALSE
NM_001114609	11	4	227195	Ino80d	1.35289	1	FALSE	FALSE
NM_021272	63	10	12140	Fabp7	2.11084	1.38037	FALSE	FALSE
NM_008031	77	26	14265	Fmr1	2.19799	1.79535	FALSE	FALSE
NM_001079694	675	90	20384	Srsf5	3.14081	2.33461	FALSE	FALSE
NM_194341	62	18	217030	Synrg	2.10389	1.63564	FALSE	FALSE
NM_010306	930	148	14679	Gnai3	3.27998	2.55063	FALSE	FALSE
NM_144559	318	30	246256	Fcgr4	2.81393	1.85749	FALSE	FALSE
NM_001243161	118	18	207958	Alg11	2.38338	1.63564	FALSE	FALSE
NM_146067	137	21	223978	Cpped1	2.44822	1.70259	FALSE	FALSE
NM_009289	234	90	20874	Slk	2.68072	2.33461	FALSE	FALSE
NM_021434	40	21	58245	Gpr180	1.91356	1.70259	FALSE	FALSE
NM_001145881	17	6	232784	Zfp212	1.54195	1.15852	FALSE	FALSE
NM_133768	328	29	109900	Asl	2.82738	1.84277	FALSE	FALSE
NM_026721	31	10	68427	Slc39a13	1.80286	1.38037	FALSE	FALSE
NM_001033201	140	31	433702	Ncbp1	2.45763	1.87173	FALSE	FALSE
NM_028006	16	5	71924	Tube1	1.51562	1.07934	FALSE	FALSE
NM_019482	35	5	55991	Panx1	1.85557	1.07934	FALSE	FALSE
NM_001113518	853	127	54126	Arhgef7	3.24245	2.48418	FALSE	FALSE
NM_001190436	3140	230	14109	Fau	3.80843	2.7421	FALSE	FALSE
NM_172741	20	1	233103	4931406P16Rik	1.61253	1	FALSE	FALSE
NM_001162415	58	13	18640	Pfkfb2	2.07493	1.49432	FALSE	FALSE
NM_146012	11	6	52468	Ctdsp2	1.35289	1.15852	FALSE	FALSE
NM_027182	51	14	69716	Trip13	2.01907	1.5265	FALSE	FALSE
NM_001083318	162	34	27049	Etv3	2.52102	1.91185	FALSE	FALSE
NM_001168497	160	40	70310	Plscr3	2.51562	1.98243	FALSE	FALSE
NM_001163618	79	12	71807	Tars2	2.20913	1.45955	FALSE	FALSE
NM_008916	185	37	19062	Inpp5k	2.57867	1.94857	FALSE	FALSE
NM_172693	23	7	230145	Galnt12	1.67323	1.22547	FALSE	FALSE
NM_025935	66	11	67046	Tbc1d7	2.13105	1.42177	FALSE	FALSE
NM_008369	134	26	16188	Il3ra	2.43861	1.79535	FALSE	FALSE
NM_023230	639	35	66589	Ube2v1	3.117	1.92444	FALSE	FALSE
NM_009883	457	88	12608	Cebpb	2.97142	2.32486	FALSE	FALSE
NM_011240	176	41	19386	Ranbp2	2.55701	1.99316	FALSE	FALSE
NM_175090	640	57	20529	Slc31a1	3.11768	2.13625	FALSE	FALSE
NM_026556	266	53	68097	Dynll2	2.73638	2.10465	FALSE	FALSE
NM_145930	41	11	106064	AW549877	1.92429	1.42177	FALSE	FALSE
NM_009663	3919	293	11690	Alox5ap	3.90468	2.84724	FALSE	FALSE
NM_019653	544	122	78889	Wsb1	3.0471	2.46673	FALSE	FALSE
NM_028411	20	4	72982	Tmem138	1.61253	1	FALSE	FALSE
NM_001033379	32	3	319618	Dcp1b	1.81665	1	FALSE	FALSE
NM_016722	398	70	50917	Galns	2.91138	2.22547	FALSE	FALSE
NM_028341	17	4	72747	Ttc39c	1.54195	1	FALSE	FALSE
NM_001163687	116	21	67111	Naaa	2.37596	1.70259	FALSE	FALSE
NM_027353	188	19	70233	Cd2bp2	2.58566	1.65913	FALSE	FALSE
NM_015749	756	152	21452	Tcn2	3.19002	2.56222	FALSE	FALSE
NM_080848	264	53	140858	Wdr5	2.73311	2.10465	FALSE	FALSE
NM_172381	141	39	230249	AI314180	2.46072	1.97144	FALSE	FALSE
NM_001198977	360	66	20963	Syk	2.8678	2.19992	FALSE	FALSE
NM_007621	207	12	12409	Cbr2	2.62747	1.45955	FALSE	FALSE
NM_145497	28	0	225994	Nmrk1	1.75866	1	FALSE	FALSE
NM_001163311	19	3	27364	Srr	1.59026	1	FALSE	FALSE
NM_001166630_dup1	1207	71	NA	NA	3.39321	2.23163	FALSE	FALSE
NM_011499	484	153	20901	Strap	2.99635	2.56506	FALSE	FALSE
NM_010500	335	53	15939	Ier5	2.83655	2.10465	FALSE	FALSE
NM_153137	79	8	215243	Traf3ip3	2.20913	1.28346	FALSE	FALSE
NM_199056	21	6	75678	Ippk	1.63372	1.15852	FALSE	FALSE
NM_001163441	88	17	17454	Mov10	2.25598	1.61082	FALSE	FALSE
NM_001136054	156	35	11907	Ate1	2.50463	1.92444	FALSE	FALSE
NM_001110832	389	77	18044	Nfya	2.90145	2.26686	FALSE	FALSE
NM_145619	112	14	235587	Parp3	2.36072	1.5265	FALSE	FALSE
NM_011662	3488	396	22177	Tyrobp	3.85408	2.97807	FALSE	FALSE
NM_028118	16	6	72137	Wdsub1	1.51562	1.15852	FALSE	FALSE
NM_145149	44	25	233046	Rasgrp4	1.95495	1.77831	FALSE	FALSE
NM_001166635	181	18	68041	Mid1ip1	2.56918	1.63564	FALSE	FALSE
NM_175025	83	23	235574	Atp2c1	2.23058	1.7421	FALSE	FALSE
NM_181066	37	4	231841	Brat1	1.8797	1	FALSE	FALSE
NM_011424	76	12	20602	Ncor2	2.19232	1.45955	FALSE	FALSE
NM_153142	153	25	103710	Slc35e4	2.49619	1.77831	FALSE	FALSE
NM_145985	578	152	213827	Arcn1	3.07343	2.56222	FALSE	FALSE
NM_172590	149	38	218460	Wdr41	2.48469	1.96016	FALSE	FALSE
NM_001164422	132	21	66943	Pqlc1	2.43208	1.70259	FALSE	FALSE
NM_173430	12	6	243853	Fkrp	1.39068	1.15852	FALSE	FALSE
NM_001099349_dup5	186	24	NA	NA	2.58101	1.76058	FALSE	FALSE
NM_027472	53	14	70591	5730455P16Rik	2.03578	1.5265	FALSE	FALSE
NM_001253872	130	22	16408	Itgal	2.42544	1.7228	FALSE	FALSE
NM_026444	1232	121	12974	Cs	3.40211	2.46316	FALSE	FALSE
NM_011187	1674	137	19177	Psmb7	3.53526	2.51709	FALSE	FALSE
NM_178729	48	14	242960	Fbxl5	1.99274	1.5265	FALSE	FALSE
NM_013651	274	59	20222	Sf3a2	2.74925	2.15122	FALSE	FALSE
NM_028864	254	51	78781	Zc3hav1	2.71634	2.08794	FALSE	FALSE
NM_144528	51	30	70294	Rnf126	2.01907	1.85749	FALSE	FALSE
NM_172785	101	17	237256	Zc3h12d	2.31582	1.61082	FALSE	FALSE
NM_013549	10908	994	15267	Hist2h2aa1	4.34925	3.37776	FALSE	FALSE
NM_030700	122	15	80884	Maged2	2.39786	1.55646	FALSE	FALSE
NM_001081183	107	18	66185	1110037F02Rik	2.34089	1.63564	FALSE	FALSE
NM_001033270	141	47	218756	Slc4a7	2.46072	2.05247	FALSE	FALSE
NM_175285	46	6	96957	Tmem62	1.97426	1.15852	FALSE	FALSE
NM_022314	5492	420	59069	Tpm3	4.05123	3.00362	FALSE	FALSE
NM_016858	43	6	19338	Rab33b	1.94497	1.15852	FALSE	FALSE
NM_178794	21	2	22184	Zrsr2	1.63372	1	FALSE	FALSE
NM_172730	52	12	232236	Ccdc174	2.0275	1.45955	FALSE	FALSE
NM_027498	71	22	70661	Sik3	2.16276	1.7228	FALSE	FALSE
NM_138664	18	0	246738	Dnajc28	1.56677	1	FALSE	FALSE
NM_001253898	40	5	26940	Ecsit	1.91356	1.07934	FALSE	FALSE
NM_001081406	50	2	69706	Lrr1	2.01047	1	FALSE	FALSE
NM_153582	14	3	97487	Cmtm4	1.45763	1	FALSE	FALSE
NM_029975	399	62	77777	Ulbp1	2.91247	2.17276	FALSE	FALSE
NM_021412	215	34	58223	Mmp19	2.64394	1.91185	FALSE	FALSE
NM_133746	72	8	72691	Calhm2	2.16883	1.28346	FALSE	FALSE
NM_175560	41	13	269997	Zfp747	1.92429	1.49432	FALSE	FALSE
NM_001164062	97	33	20850	Stat5a	2.29827	1.89889	FALSE	FALSE
NM_008839	35	10	18706	Pik3ca	1.85557	1.38037	FALSE	FALSE
NM_025504	35	6	66349	Atp5sl	1.85557	1.15852	FALSE	FALSE
[truncated: 10,969 more rows]

## Sheet: analyze-runoff-data-flaA.csv
	flaA.untr	flaA.harr	EG	Symbol	untrNormLog10	harrNormLog10	isCytokine-related	isHousekeeping
NM_007652	37	32	12509	Cd59a	2.16687	2.09801	FALSE	FALSE
NM_020567	94	54	57441	Gmnn	2.57179	2.32526	FALSE	FALSE
NM_001159617	38	80	56176	Pigp	2.17845	2.49595	FALSE	FALSE
NM_001037812	52	53	381259	Tmem237	2.31467	2.31714	FALSE	FALSE
NM_022882	71	220	64898	Lpin2	2.44992	2.93529	FALSE	FALSE
NM_001198823	2726	3639	11820	App	4.03419	4.15385	FALSE	FALSE
NM_001163432	21	43	12748	Clk2	1.92089	2.22633	FALSE	FALSE
NM_001080968	79	82	99412	Golga2	2.49629	2.50668	FALSE	FALSE
NM_153063	17	17	224691	Zfp472	1.82911	1.82331	FALSE	FALSE
NM_011509	133	200	100041294	Gm3258	2.72252	2.89389	FALSE	FALSE
NM_145222	14	29	227327	B3gnt7	1.74479	2.05526	FALSE	FALSE
NM_001040111	167	183	69710	Arap1	2.82138	2.85532	FALSE	FALSE
NM_133186	57	69	68428	Steap3	2.35454	2.43171	FALSE	FALSE
NM_010234	887	927	14281	Fos	3.54659	3.55994	FALSE	FALSE
NM_172541	137	261	215210	Tmem120a	2.73539	3.00951	FALSE	FALSE
NM_024448	152	488	19328	Rab12	2.78051	3.28128	FALSE	FALSE
NM_021366	50	58	50794	Klf13	2.29764	2.35629	FALSE	FALSE
NM_001136070	18	19	16865	Eif2d	1.85394	1.87162	FALSE	FALSE
NM_019703	325	254	56421	Pfkp	3.11055	2.9977	FALSE	FALSE
NM_026217	92	131	67526	Atg12	2.56245	2.71014	FALSE	FALSE
NM_001029842	60	128	104681	Slc16a6	2.37682	2.70007	FALSE	FALSE
NM_001168297	31	110	71865	Fbxo30	2.09003	2.63426	FALSE	FALSE
NM_001040397	19	116	78749	Filip1l	1.87742	2.65732	FALSE	FALSE
NM_007421	300	251	11565	Adssl1	3.07579	2.99254	FALSE	FALSE
NM_173748	84	90	209586	Nudcd3	2.52295	2.54711	FALSE	FALSE
NM_201393	876	1580	18810	Plec	3.54117	3.79152	FALSE	FALSE
NM_008402	2161	7118	16410	Itgav	3.93332	4.44522	FALSE	FALSE
NM_033596	1827	3532	97122	Hist2h4	3.8604	4.14089	FALSE	FALSE
NM_001008542	175	627	17859	Mxi1	2.8417	3.39013	FALSE	FALSE
NM_011291	4015	4318	19989	Rpl7	4.20235	4.22815	FALSE	FALSE
NM_001033962	146	170	22215	Ube3a	2.76302	2.82331	FALSE	FALSE
NM_011400	2013	1927	20525	Slc2a1	3.90251	3.87775	FALSE	FALSE
NM_027203	66	156	69757	Leng1	2.41821	2.78599	FALSE	FALSE
NM_001166457	154	120	210766	Brcc3	2.78619	2.67205	FALSE	FALSE
NM_001161845	172	364	20393	Sgk1	2.83419	3.15397	FALSE	FALSE
NM_007807	5601	9229	13058	Cybb	4.34693	4.55802	FALSE	FALSE
NM_001170537	159	128	17260	Mef2c	2.80006	2.70007	FALSE	FALSE
NM_001163487	20	9	18642	Pfkm	1.8997	1.54711	FALSE	FALSE
NM_001083334	419	577	30948	Bin1	3.22088	3.35404	FALSE	FALSE
NM_001205082	94	181	20778	Scarb1	2.57179	2.85054	FALSE	FALSE
NM_001025594	52	141	71834	Zbtb43	2.31467	2.74208	FALSE	FALSE
NM_025951	12	20	67073	Pi4k2b	1.67785	1.89389	FALSE	FALSE
NM_008385	36	44	16330	Inpp5b	2.15497	2.23632	FALSE	FALSE
NM_001081013	49	103	109263	Rlf	2.28886	2.6057	FALSE	FALSE
NM_029447	75	69	75805	Nln	2.47373	2.43171	FALSE	FALSE
NM_001256132	95	124	93790	Nipa2	2.57639	2.68629	FALSE	FALSE
NM_028523	66	321	73379	Dcbld2	2.41821	3.09937	FALSE	FALSE
NM_026176	194	151	67466	Pdcl	2.88647	2.77184	FALSE	FALSE
NM_025555	32	44	66421	2410004B18Rik	2.10382	2.23632	FALSE	FALSE
NM_016874	5	13	54006	Deaf1	1.29764	1.70681	FALSE	FALSE
NM_010119	2231	3693	13660	Ehd1	3.94717	4.16024	FALSE	FALSE
NM_001083958	19	32	72611	Zfp655	1.87742	2.09801	FALSE	FALSE
NM_001141977	176	262	72119	Tpx2	2.84418	3.01117	FALSE	FALSE
NM_172606	240	236	223455	2016-03-06	2.97888	2.96578	FALSE	FALSE
NM_026042	258	416	67224	Med29	3.01029	3.21196	FALSE	FALSE
NM_019567	116	221	56215	Acin1	2.66312	2.93726	FALSE	FALSE
NM_009777	5733	7606	12260	C1qb	4.35705	4.47402	FALSE	FALSE
NM_031868	1100	1571	19045	Ppp1ca	3.64006	3.78904	FALSE	FALSE
NM_001164792	11	43	21983	Tpbg	1.64006	2.22633	FALSE	FALSE
NM_007573	435	391	12261	C1qbp	3.23716	3.18504	FALSE	FALSE
NM_001033449	54	55	381259	Tmem237	2.33106	2.33323	FALSE	FALSE
NM_177568	14	14	18796	Plcb2	1.74479	1.73899	FALSE	FALSE
NM_053187	83	123	94221	Gopc	2.51774	2.68277	FALSE	FALSE
NM_001034097	43	90	619441	Tnfsf12Tnfsf13	2.23213	2.54711	FALSE	FALSE
NM_025520	66	70	66373	Lsm5	2.41821	2.43796	FALSE	FALSE
NM_175306	25	35	100169	Phactr4	1.99661	2.13693	FALSE	FALSE
NM_001171035	3565	3554	110213	Tmbim6	4.15073	4.14358	FALSE	FALSE
NM_199476	33	33	382985	Rrm2b	2.11718	2.11138	FALSE	FALSE
NM_172259	238	226	216459	Myl6b	2.97524	2.94697	FALSE	FALSE
NM_134033	35	61	104479	Ccdc117	2.14273	2.37819	FALSE	FALSE
NM_001122596	82	69	213438	A630033H20Rik	2.51248	2.43171	FALSE	FALSE
NM_172989	50	175	14745	Lpar1	2.29764	2.8359	FALSE	FALSE
NM_028835	86	91	74244	Atg7	2.53316	2.55191	FALSE	FALSE
NM_001113354	57	103	320595	Phf8	2.35454	2.6057	FALSE	FALSE
NM_013859	25	38	29805	Znhit2	1.99661	2.17265	FALSE	FALSE
NM_139311	18	59	246198	Mllt6	1.85394	2.36372	FALSE	FALSE
NM_153544	17	18	217216	BC030867	1.82911	1.84814	FALSE	FALSE
NM_172145	20	32	230752	Eva1b	1.8997	2.09801	FALSE	FALSE
NM_025836	275	182	66905	Plin3	3.038	2.85294	FALSE	FALSE
NM_007999	181	204	14156	Fen1	2.85634	2.9025	FALSE	FALSE
NM_001145821	223	183	14594	Ggta1	2.94697	2.85532	FALSE	FALSE
NM_001253702	49	76	229681	St7l	2.28886	2.47368	FALSE	FALSE
NM_138749	198	212	140570	Plxnb2	2.89533	2.9192	FALSE	FALSE
NM_139197	26	13	227671	Gbgt1	2.01364	1.70681	FALSE	FALSE
NM_080554	206	175	66998	Psmd5	2.91253	2.8359	FALSE	FALSE
NM_145529	96	121	228410	Cstf3	2.58094	2.67565	FALSE	FALSE
NM_030690	102	198	75646	Rai14	2.60727	2.88953	FALSE	FALSE
NM_009395	120	151	21927	Tnfaip1	2.67785	2.77184	FALSE	FALSE
NM_026378	13	18	67789	Dalrd3	1.71261	1.84814	FALSE	FALSE
NM_018825	72	156	23921	Sh2b2	2.456	2.78599	FALSE	FALSE
NM_033444	4542	3711	114584	Clic1	4.25591	4.16236	FALSE	FALSE
NM_001252060	6	18	12286	Cacna1a	1.37682	1.84814	FALSE	FALSE
NM_001042513	692	1732	50493	Txnrd1	3.43877	3.83141	FALSE	FALSE
NM_175445	157	147	215653	Rassf2	2.79457	2.76018	FALSE	FALSE
NM_028840	74	106	74252	Armc1	2.4679	2.61817	FALSE	FALSE
NM_008583	44	45	17283	Men1	2.24212	2.24608	FALSE	FALSE
NM_021887	180	129	60504	Il21r	2.85394	2.70345	FALSE	FALSE
NM_029645	23	14	384281	Gatc	1.96039	1.73899	FALSE	FALSE
NM_019772	297	381	56372	1110004F10Rik	3.07142	3.17379	FALSE	FALSE
NM_011523	34	67	20975	Synj2	2.13014	2.41894	FALSE	FALSE
NM_178279	133	273	218699	Pxk	2.72252	3.02903	FALSE	FALSE
NM_001142697	33	55	66648	Tpgs2	2.11718	2.33323	FALSE	FALSE
NM_133850	151	189	99311	Commd7	2.77764	2.86933	FALSE	FALSE
NM_023117	37	43	12531	Cdc25b	2.16687	2.22633	FALSE	FALSE
NM_010911	67	69	18041	Nfs1	2.42474	2.43171	FALSE	FALSE
NM_198831	145	188	52443	Mrpl48	2.76003	2.86702	FALSE	FALSE
NM_001033711	796	756	14017	Evi2a	3.49958	3.47139	FALSE	FALSE
NM_001164190	117	166	17772	Mtm1	2.66685	2.81297	FALSE	FALSE
NM_008334	1	12	15970	Ifna7	1	1.67205	FALSE	FALSE
NM_027975	28	13	71878	Fam83d	2.04582	1.70681	FALSE	FALSE
NM_001013379	19	19	234358	Zfp930	1.87742	1.87162	FALSE	FALSE
NM_001004142	19	12	195046	Nlrp1a	1.87742	1.67205	FALSE	FALSE
NM_007681	78	130	12615	Cenpa	2.49076	2.70681	FALSE	FALSE
NM_001166431	1370	1763	98758	Hnrnpf	3.73539	3.83912	FALSE	FALSE
NM_001039137	85	63	56367	Scoc	2.52808	2.39221	FALSE	FALSE
NM_080446	50	31	117599	Helb	2.29764	2.08423	FALSE	FALSE
NM_028754	56	67	74098	0610037L13Rik	2.34685	2.41894	FALSE	FALSE
NM_007861	468	838	13382	Dld	3.26891	3.51611	FALSE	FALSE
NM_027900	20	72	71750	R3hdm2	1.8997	2.4502	FALSE	FALSE
NM_024273	35	44	76916	Timmdc1	2.14273	2.23632	FALSE	FALSE
NM_201357	91	123	380752	Tssc1	2.55771	2.68277	FALSE	FALSE
NM_133825	93	92	52392	D1Ertd622e	2.56715	2.55665	FALSE	FALSE
NM_201407	75	96	229541	Dennd4b	2.47373	2.57514	FALSE	FALSE
NM_025281	63	105	17089	Lyar	2.39801	2.61405	FALSE	FALSE
NM_177601	11	20	212090	Tmem60	1.64006	1.89389	FALSE	FALSE
NM_130882	37	56	170716	Cyp4f13	2.16687	2.34105	FALSE	FALSE
NM_001146086	34	100	78938	Fbxo34	2.13014	2.59286	FALSE	FALSE
NM_021335	418	491	20639	Snrpb2	3.21984	3.28395	FALSE	FALSE
NM_023773	45	61	75339	Mphosph8	2.25188	2.37819	FALSE	FALSE
NM_011394	6	18	20516	Slc20a2	1.37682	1.84814	FALSE	FALSE
NM_134042	33	34	104776	Aldh6a1	2.11718	2.12434	FALSE	FALSE
NM_001110809	30	21	66614	Gpatch4	2.07579	1.91508	FALSE	FALSE
NM_007788	284	484	12995	Csnk2a1	3.05198	3.27771	FALSE	FALSE
NM_178891	42	36	99890	Prmt6	2.22192	2.14917	FALSE	FALSE
NM_172620	84	69	224705	Vps52	2.52295	2.43171	FALSE	FALSE
NM_198013	8	17	103841	Cuedc1	1.50176	1.82331	FALSE	FALSE
NM_021524	667	865	59027	Nampt	3.42279	3.52988	FALSE	FALSE
NM_183138	12	19	194388	Tet3	1.67785	1.87162	FALSE	FALSE
NM_011822	20	51	14755	Pigq	1.8997	2.30044	FALSE	FALSE
NM_027395	267	359	70350	Basp1	3.02518	3.14796	FALSE	FALSE
NM_020035	11	22	56703	Pigo	1.64006	1.93529	FALSE	FALSE
NM_009830	73	36	12448	Ccne2	2.46199	2.14917	FALSE	FALSE
NM_019501	40	36	56075	Pdss1	2.20073	2.14917	FALSE	FALSE
NM_028233	86	127	72416	Lrpprc	2.53316	2.69667	FALSE	FALSE
NM_001040403	84	218	14252	Flot2	2.52295	2.93132	FALSE	FALSE
NM_001159525	109	119	19298	Pex19	2.63609	2.66841	FALSE	FALSE
NM_148922	13	18	17245	Mdm1	1.71261	1.84814	FALSE	FALSE
NM_007928	114	324	13728	Mark2	2.65557	3.10341	FALSE	FALSE
NM_001033463	6	23	381801	Tatdn2	1.37682	1.95459	FALSE	FALSE
NM_177582	11	34	208104	Mlxip	1.64006	2.12434	FALSE	FALSE
NM_010807	1881	6013	17357	Marcksl1	3.87305	4.37196	FALSE	FALSE
NM_013770	229	148	27376	Slc25a10	2.9585	2.76313	FALSE	FALSE
NM_010546	172	464	16150	Ikbkb	2.83419	3.25938	FALSE	FALSE
NM_199018	22	20	236920	Stard8	1.94109	1.89389	FALSE	FALSE
NM_001033157	30	51	236366	5730507C01Rik	2.07579	2.30044	FALSE	FALSE
NM_001122978	12	10	26885	Casp8ap2	1.67785	1.59286	FALSE	FALSE
NM_146238	16	11	237221	Gemin8	1.80279	1.63426	FALSE	FALSE
NM_007713	43	82	102414	Clk3	2.23213	2.50668	FALSE	FALSE
NM_025388	219	215	66155	Ufc1	2.93911	2.9253	FALSE	FALSE
NM_001039959	192	345	66395	Ahnak	2.88197	3.13068	FALSE	FALSE
NM_001165997	19	12	76857	Spopl	1.87742	1.67205	FALSE	FALSE
NM_001142921	33	50	21416	Tcf7l2	2.11718	2.29183	FALSE	FALSE
NM_001167991	14	29	170833	Hook2	1.74479	2.05526	FALSE	FALSE
NM_018793	38	23	54721	Tyk2	2.17845	1.95459	FALSE	FALSE
NM_026675	36	19	68323	Nudt22	2.15497	1.87162	FALSE	FALSE
NM_001100109	829	1608	665155	Srp54b	3.51722	3.79915	FALSE	FALSE
NM_001162989	109	175	56698	Phax	2.63609	2.8359	FALSE	FALSE
NM_029573	331	300	67834	Idh3a	3.11849	3.06999	FALSE	FALSE
NM_026125	16	12	67389	Fam132a	1.80279	1.67205	FALSE	FALSE
NM_029814	507	550	76959	Chmp5	3.30367	3.33323	FALSE	FALSE
NM_026392	86	112	70397	Tmem70	2.53316	2.64208	FALSE	FALSE
NM_001190302	67	61	665211	Gm14326	2.42474	2.37819	FALSE	FALSE
NM_023526	16	12	69721	Nkiras1	1.80279	1.67205	FALSE	FALSE
NM_020493	15	15	20807	Srf	1.77476	1.76896	FALSE	FALSE
NM_025313	682	766	66043	Atp5d	3.43245	3.47709	FALSE	FALSE
NM_001243040	502	852	100042856	Gm4070	3.29937	3.5233	FALSE	FALSE
NM_011897	32	47	24064	Spry2	2.10382	2.26496	FALSE	FALSE
NM_025443	322	255	66249	Pno1	3.10652	2.99941	FALSE	FALSE
NM_026091	54	61	67326	1700037H04Rik	2.33106	2.37819	FALSE	FALSE
NM_001252491	17	26	64291	Osbpl1a	1.82911	2.00784	FALSE	FALSE
NM_001145960	786	916	56857	Slc37a2	3.49409	3.55476	FALSE	FALSE
NM_001252200	135	485	26921	Map4k4	2.729	3.27861	FALSE	FALSE
NM_178925	18	20	106338	Nsun3	1.85394	1.89389	FALSE	FALSE
NM_007502	1546	2582	11933	Atp1b3	3.78788	4.00482	FALSE	FALSE
NM_008194	442	423	14933	Gyk	3.24409	3.21921	FALSE	FALSE
NM_026518	47	107	68031	Rnf146	2.27076	2.62225	FALSE	FALSE
NM_145976	93	27	212937	Tifab	2.56715	2.02423	FALSE	FALSE
NM_011956	182	167	26426	Nubp2	2.85874	2.81558	FALSE	FALSE
NM_008723	110	91	18150	Npm3	2.64006	2.55191	FALSE	FALSE
NM_001252550	106	108	217370	BC017643	2.62397	2.62629	FALSE	FALSE
NM_001163555	153	91	18987	Pou2f2	2.78336	2.55191	FALSE	FALSE
NM_025872	79	128	66964	Golt1b	2.49629	2.70007	FALSE	FALSE
NM_020589	12	19	68910	Zfp467	1.67785	1.87162	FALSE	FALSE
NM_173388	498	403	215113	Slc43a2	3.2959	3.19817	FALSE	FALSE
NM_183031	208	165	321019	Gpr183	2.91673	2.81035	FALSE	FALSE
NM_001013832	62	24	436440	Gpr31b	2.39106	1.97308	FALSE	FALSE
NM_172578	24	53	217653	Mis18bp1	1.97888	2.31714	FALSE	FALSE
NM_001164406	154	208	24068	Sra1	2.78619	2.91093	FALSE	FALSE
NM_026187	21	23	52231	Ankzf1	1.92089	1.95459	FALSE	FALSE
NM_001167832	8	12	233893	Zfp764	1.50176	1.67205	FALSE	FALSE
NM_001252587	94	56	228880	Zmynd8	2.57179	2.34105	FALSE	FALSE
NM_026877	59	64	68938	Aspscr1	2.36952	2.39904	FALSE	FALSE
NM_007700	59	180	12675	Chuk	2.36952	2.84814	FALSE	FALSE
NM_009351	78	48	21745	Tep1	2.49076	2.27411	FALSE	FALSE
NM_207636	235	388	319448	Fndc3a	2.96973	3.1817	FALSE	FALSE
NM_025375	123	119	66138	Wbscr22	2.68857	2.66841	FALSE	FALSE
NM_178701	132	376	231549	Lrrc8d	2.71924	3.16805	FALSE	FALSE
NM_001165984	410	619	74383	Ubap2l	3.21145	3.38456	FALSE	FALSE
NM_013860	33	52	29806	Limd1	2.11718	2.30887	FALSE	FALSE
NM_001037940	641	1662	23950	Dnajb6	3.40552	3.8135	FALSE	FALSE
NM_001145902	311	176	228359	Arhgap1	3.09143	2.83838	FALSE	FALSE
NM_026662	139	112	110639	Prps2	2.74168	2.64208	FALSE	FALSE
NM_001100116	405	1286	100101807	1700047I17Rik2	3.20612	3.70211	FALSE	FALSE
NM_001130458	377	527	21452	Tcn2	3.17501	3.31468	FALSE	FALSE
NM_198109	18	68	231637	Ssh1	1.85394	2.42537	FALSE	FALSE
NM_009157	136	399	26398	Map2k4	2.7322	3.19384	FALSE	FALSE
NM_001162996	92	146	72205	Eml2	2.56245	2.75722	FALSE	FALSE
NM_019637	21	27	56291	Styx	1.92089	2.02423	FALSE	FALSE
NM_028439	9	14	73103	3110009E18Rik	1.55291	1.73899	FALSE	FALSE
NM_173443	72	151	70675	Vcpip1	2.456	2.77184	FALSE	FALSE
NM_001160415	247	371	80287	Apobec3	2.99136	3.16224	FALSE	FALSE
NM_145510	37	22	98710	Rabif	2.16687	1.93529	FALSE	FALSE
NM_025591	38	46	66488	Fam136a	2.17845	2.25562	FALSE	FALSE
NM_029861	12	7	380686	Cnrip1	1.67785	1.43796	FALSE	FALSE
NM_001252532	3	16	217325	Llgl2	1.07579	1.79698	FALSE	FALSE
NM_016706	20	19	12812	Coil	1.8997	1.87162	FALSE	FALSE
NM_029278	92	119	75416	Nop14	2.56245	2.66841	FALSE	FALSE
NM_010155	42	109	13875	Erf	2.22192	2.63029	FALSE	FALSE
NM_025300	102	126	27395	Mrpl15	2.60727	2.69324	FALSE	FALSE
NM_175104	21	50	66306	Fam53c	1.92089	2.29183	FALSE	FALSE
NM_007483	1021	4180	11852	Rhob	3.60769	4.21404	FALSE	FALSE
NM_025968	263	235	67103	Ptgr1	3.01862	2.96393	FALSE	FALSE
NM_023243	140	147	66671	Ccnh	2.74479	2.76018	FALSE	FALSE
NM_177780	19	13	68813	Dock5	1.87742	1.70681	FALSE	FALSE
NM_011884	89	204	24018	Rngtt	2.54806	2.9025	FALSE	FALSE
NM_025450	126	100	66258	Mrps17	2.69904	2.59286	FALSE	FALSE
NM_011233	31	60	19356	Rad17	2.09003	2.37102	FALSE	FALSE
NM_007609	422	1370	12363	Casp4	3.22398	3.72959	FALSE	FALSE
NM_145943	271	882	208768	Sde2	3.03164	3.53833	FALSE	FALSE
NM_019682	505	390	56455	Dynll1	3.30196	3.18393	FALSE	FALSE
NM_008248	776	884	15254	Hint1	3.48853	3.53932	FALSE	FALSE
NM_008730	78	122	18164	Nptx1	2.49076	2.67922	FALSE	FALSE
NM_001160378	89	145	212943	Fam46a	2.54806	2.75423	FALSE	FALSE
NM_010120	306	539	13664	Eif1a	3.08439	3.32445	FALSE	FALSE
NM_001163469	8	23	18685	Phtf1	1.50176	1.95459	FALSE	FALSE
NM_001167887	22	46	225888	Suv420h1	1.94109	2.25562	FALSE	FALSE
NM_001077359	102	193	26431	Git2	2.60727	2.87842	FALSE	FALSE
NM_001029994	42	50	76014	Zc3h18	2.22192	2.29183	FALSE	FALSE
NM_020022	60	61	19718	Rfc2	2.37682	2.37819	FALSE	FALSE
NM_013815	196	841	217578	Baz1a	2.89092	3.51766	FALSE	FALSE
NM_001205231	516	944	22185	U2af2	3.31132	3.56784	FALSE	FALSE
NM_022015	46	39	63856	Taf8	2.26142	2.18393	FALSE	FALSE
NM_027382	44	47	70315	Hdac8	2.24212	2.26496	FALSE	FALSE
NM_001005866	8	14	30841	Kdm2b	1.50176	1.73899	FALSE	FALSE
NM_178693	50	32	227683	Coq4	2.29764	2.09801	FALSE	FALSE
NM_001163704	66	59	50762	Fbxo6	2.41821	2.36372	FALSE	FALSE
NM_016896	43	134	53859	Map3k14	2.23213	2.71997	FALSE	FALSE
NM_001081321	54	128	71521	Pds5a	2.33106	2.70007	FALSE	FALSE
NM_009939	296	439	12848	Cops2	3.06996	3.23533	FALSE	FALSE
NM_153795	838	774	108101	Fermt3	3.52191	3.48161	FALSE	FALSE
NM_001177406_dup2	61	53	NA	NA	2.384	2.31714	FALSE	FALSE
NM_001005509	236	220	229317	Eif2a	2.97158	2.93529	FALSE	FALSE
NM_001177752	1058	4112	170768	Pfkfb3	3.62315	4.20692	FALSE	FALSE
NM_001114085	145	135	67203	Nde1	2.76003	2.7232	FALSE	FALSE
NM_133780	123	301	108989	Tpr	2.68857	3.07143	FALSE	FALSE
NM_174998	4	11	170638	Hpcal4	1.20073	1.63426	FALSE	FALSE
NM_001005475	22	25	245666	Iqsec2	1.94109	1.9908	FALSE	FALSE
NM_053169	11	8	94092	Trim16	1.64006	1.49595	FALSE	FALSE
NM_001110337	2	18	70355	Gprc5c	1	1.84814	FALSE	FALSE
NM_133906	44	79	74570	Zkscan1	2.24212	2.49049	FALSE	FALSE
NM_026958	215	248	380773	Slirp	2.9311	2.98732	FALSE	FALSE
NM_177429	7	30	237222	Ofd1	1.44376	2.06999	FALSE	FALSE
NM_008033	157	134	14272	Fnta	2.79457	2.71997	FALSE	FALSE
NM_010304	134	104	14676	Gna15	2.72577	2.6099	FALSE	FALSE
NM_146065	71	67	223922	Atf7	2.44992	2.41894	FALSE	FALSE
NM_021436	14	50	230157	Tmeff1	1.74479	2.29183	FALSE	FALSE
NM_001081152	27	24	244879	Npat	2.03003	1.97308	FALSE	FALSE
NM_019480	24	40	55960	Ebag9	1.97888	2.19492	FALSE	FALSE
NM_029788	57	59	76892	Rnft1	2.35454	2.36372	FALSE	FALSE
NM_027830	5	11	71567	Mcm9	1.29764	1.63426	FALSE	FALSE
NM_001256055	398	635	100042807	Eif3j2	3.19855	3.39564	FALSE	FALSE
NM_001162417	102	223	17876	Myef2	2.60727	2.94117	FALSE	FALSE
NM_027711	69	122	544963	Iqgap2	2.43751	2.67922	FALSE	FALSE
NM_001164352	19	13	58859	Efemp2	1.87742	1.70681	FALSE	FALSE
NM_027180	178	291	69710	Arap1	2.84909	3.05676	FALSE	FALSE
NM_016957	345	307	15331	Hmgn2	3.13648	3.08	FALSE	FALSE
NM_001195338	37	46	100503572	Bbip1	2.16687	2.25562	FALSE	FALSE
NM_001038839	102	134	18439	P2rx7	2.60727	2.71997	FALSE	FALSE
NM_028185	17	22	72290	Lsm11	1.82911	1.93529	FALSE	FALSE
NM_008914	83	118	19056	Ppp3cb	2.51774	2.66475	FALSE	FALSE
NM_172691	16	19	230088	Fam214b	1.80279	1.87162	FALSE	FALSE
NM_025937	55	103	67050	Nkap	2.33903	2.6057	FALSE	FALSE
NM_023232	105	84	66593	Diablo	2.61986	2.51714	FALSE	FALSE
NM_001163102	20	16	193838	Eme2	1.8997	1.79698	FALSE	FALSE
NM_001025309	146	167	224938	Pja2	2.76302	2.81558	FALSE	FALSE
NM_009881	16	44	12593	Cdyl	1.80279	2.23632	FALSE	FALSE
NM_175092	97	412	23912	Rhof	2.58544	3.20776	FALSE	FALSE
NM_001195244	85	112	100503890	Pet100	2.52808	2.64208	FALSE	FALSE
NM_026554	134	109	68092	Ncbp2	2.72577	2.63029	FALSE	FALSE
NM_019651	17	30	56294	Ptpn9	1.82911	2.06999	FALSE	FALSE
NM_001166408	102	198	75646	Rai14	2.60727	2.88953	FALSE	FALSE
NM_001163388	29	43	68020	Apopt1	2.06106	2.22633	FALSE	FALSE
NM_013918	118	220	30940	Usp25	2.67055	2.93529	FALSE	FALSE
NM_001161816	12	5	433287	Gm15455	1.67785	1.29183	FALSE	FALSE
NM_007858	312	472	13367	Diap1	3.09282	3.26681	FALSE	FALSE
NM_028343	244	582	72759	Tmem135	2.98606	3.35779	FALSE	FALSE
NM_172974	55	18	26895	Cops7b	2.33903	1.84814	FALSE	FALSE
NM_153049	50	70	223701	Mkl1	2.29764	2.43796	FALSE	FALSE
NM_025982	257	555	67125	Tspan31	3.0086	3.33716	FALSE	FALSE
NM_011615	71	116	21945	Dedd	2.44992	2.65732	FALSE	FALSE
NM_027351	55	33	70225	Ppil3	2.33903	2.11138	FALSE	FALSE
NM_001164569	98	392	67338	Rffl	2.58989	3.18615	FALSE	FALSE
NM_001199271	22	19	20509	Slc19a1	1.94109	1.87162	FALSE	FALSE
NM_029418	33	21	75758	9130401M01Rik	2.11718	1.91508	FALSE	FALSE
NM_146168	39	75	232023	Vopp1	2.18973	2.46793	FALSE	FALSE
NM_001177543_dup2	61	53	NA	NA	2.384	2.31714	FALSE	FALSE
NM_007964	19	24	14020	Evi5	1.87742	1.97308	FALSE	FALSE
NM_001166493	6	17	240168	Rasgrp3	1.37682	1.82331	FALSE	FALSE
NM_001037863	39	81	320940	Atp11c	2.18973	2.50135	FALSE	FALSE
NM_010502	2	16	15962	Ifna1	1	1.79698	FALSE	FALSE
NM_175683	56	78	227525	Dclre1c	2.34685	2.48496	FALSE	FALSE
NM_053204	27	32	111173	Erc1	2.03003	2.09801	FALSE	FALSE
NM_019729	94	131	84092	Usp8	2.57179	2.71014	FALSE	FALSE
NM_007447	28	30	11727	Ang	2.04582	2.06999	FALSE	FALSE
NM_011660	2837	2904	22166	Txn1	4.05153	4.05586	FALSE	FALSE
NM_001037746	114	104	328099	Prps1l3	2.65557	2.6099	FALSE	FALSE
NM_010788	31	66	17257	Mecp2	2.09003	2.41241	FALSE	FALSE
NM_025494	468	529	66335	Atp6v1c1	3.26891	3.31632	FALSE	FALSE
NM_001026212	100	113	56205	Ensa	2.59867	2.64594	FALSE	FALSE
NM_010928	269	804	18129	Notch2	3.02842	3.49812	FALSE	FALSE
NM_001033988	418	271	27057	Ncoa4	3.21984	3.02583	FALSE	FALSE
NM_011426	288	409	20612	Siglec1	3.05806	3.20459	FALSE	FALSE
NM_172592	32	65	218543	Srek1	2.10382	2.40578	FALSE	FALSE
NM_001164420	113	384	66943	Pqlc1	2.65174	3.1772	FALSE	FALSE
NM_001076789	80	77	12419	Cbx5	2.50176	2.47936	FALSE	FALSE
NM_016755	604	703	11957	Atp5j	3.3797	3.43982	FALSE	FALSE
NM_001005523	78	279	208606	Rsrc2	2.49076	3.03847	FALSE	FALSE
NM_027470	17	26	70584	Pak4	1.82911	2.00784	FALSE	FALSE
NM_008042	75	24	14294	Fpr3	2.47373	1.97308	FALSE	FALSE
NM_001253870	96	153	235043	Tmem205	2.58094	2.77756	FALSE	FALSE
NM_026446	227	164	56470	Rgs19	2.95469	2.80771	FALSE	FALSE
NM_011185	1225	959	19170	Psmb1	3.6868	3.57468	FALSE	FALSE
NM_194462	15	19	100986	Akap9	1.77476	1.87162	FALSE	FALSE
NM_013653	383	1031	20304	Ccl5	3.18186	3.60612	FALSE	FALSE
NM_028866	101	131	74320	Wdr33	2.60299	2.71014	FALSE	FALSE
NM_001164689_dup1	51	43	NA	NA	2.30624	2.22633	FALSE	FALSE
NM_178363	19	41	56531	Ylpm1	1.87742	2.20565	FALSE	FALSE
NM_001142918	33	50	21416	Tcf7l2	2.11718	2.29183	FALSE	FALSE
NM_001195486	477	976	225027	Srsf7	3.27718	3.58231	FALSE	FALSE
NM_172116	64	38	213350	Pddc1	2.40485	2.17265	FALSE	FALSE
NM_023041	164	157	19298	Pex19	2.81351	2.78876	FALSE	FALSE
NM_030702	41	30	80886	Senp3	2.21145	2.06999	FALSE	FALSE
NM_021465	170	314	20843	Stag2	2.82911	3.08979	FALSE	FALSE
NM_001081181	87	146	68115	9430016H08Rik	2.53819	2.75722	FALSE	FALSE
NM_026752	25	16	68520	Zfyve21	1.99661	1.79698	FALSE	FALSE
NM_027614	6	21	70948	Wdr20rt	1.37682	1.91508	FALSE	FALSE
NM_009067	36	24	19765	Ralbp1	2.15497	1.97308	FALSE	FALSE
NM_019817	391	439	56447	Copz1	3.19084	3.23533	FALSE	FALSE
NM_001110351	60	102	20466	Sin3a	2.37682	2.60147	FALSE	FALSE
NM_175287	44	36	97159	A430005L14Rik	2.24212	2.14917	FALSE	FALSE
NM_013477	816	995	11972	Atp6v0d1	3.51036	3.59069	FALSE	FALSE
NM_178796	85	41	328830	A530064D06Rik	2.52808	2.20565	FALSE	FALSE
NM_199146	189	237	209387	Trim30d	2.87513	2.96761	FALSE	FALSE
NM_153580	98	79	233875	Ino80e	2.58989	2.49049	FALSE	FALSE
NM_133744	35	30	72454	Ccdc71	2.14273	2.06999	FALSE	FALSE
NM_001166589	2572	3519	276770	Eif5a	4.00894	4.13928	FALSE	FALSE
NM_139153	45	128	213990	Agap3	2.25188	2.70007	FALSE	FALSE
NM_177876	78	89	330192	Vps37b	2.49076	2.54225	FALSE	FALSE
NM_012049	86	74	27045	Nit1	2.53316	2.4621	FALSE	FALSE
NM_177186	9	11	320541	Slc35e2	1.55291	1.63426	FALSE	FALSE
NM_029762	20	32	76832	Hyls1	1.8997	2.09801	FALSE	FALSE
NM_001164604	68	134	68501	Nsmce2	2.43117	2.71997	FALSE	FALSE
NM_001044704	24	59	22697	Zscan21	1.97888	2.36372	FALSE	FALSE
NM_030243	60	107	71684	Rbm43	2.37682	2.62225	FALSE	FALSE
NM_027405	68	150	70373	Gpatch2l	2.43117	2.76896	FALSE	FALSE
NM_001253805	3482	4701	22631	Ywhaz	4.14049	4.26506	FALSE	FALSE
NM_011879	607	1250	24010	Ik	3.38185	3.68977	FALSE	FALSE
NM_001110229	299	464	14007	Celf2	3.07434	3.25938	FALSE	FALSE
NM_009210	63	77	20585	Hltf	2.39801	2.47936	FALSE	FALSE
NM_026033	15	63	67210	Gatad1	1.77476	2.39221	FALSE	FALSE
NM_001252433	32	77	13383	Dlg1	2.10382	2.47936	FALSE	FALSE
NM_009728	11	27	11982	Atp10a	1.64006	2.02423	FALSE	FALSE
NM_008176	1599	6378	14825	Cxcl1	3.80251	4.39755	TRUE	FALSE
NM_008886	14	14	18861	Pms2	1.74479	1.73899	FALSE	FALSE
NM_001128198	57	90	230895	Vps13d	2.35454	2.54711	FALSE	FALSE
NM_001082962	12	13	20646	Snrpn	1.67785	1.70681	FALSE	FALSE
NM_133955	12	46	69581	Rhou	1.67785	2.25562	FALSE	FALSE
NM_031998	28	16	83922	Cep41	2.04582	1.79698	FALSE	FALSE
NM_198606	351	771	223499	Dcaf13	3.14397	3.47992	FALSE	FALSE
NM_001102415	4	15	117591	Slc2a9	1.20073	1.76896	FALSE	FALSE
NM_001081215	60	80	234311	Ddx60	2.37682	2.49595	FALSE	FALSE
NM_001161456	101	151	12400	Cbfb	2.60299	2.77184	FALSE	FALSE
NM_021472	288	376	58809	Rnase4	3.05806	3.16805	FALSE	FALSE
NM_001177407_dup1	60	54	NA	NA	2.37682	2.32526	FALSE	FALSE
NM_178644	209	714	102644	Oaf	2.91881	3.44656	FALSE	FALSE
NM_172893	170	217	243771	Parp12	2.82911	2.92932	FALSE	FALSE
NM_198246	37	48	70120	Yars2	2.16687	2.27411	FALSE	FALSE
NM_175294	431	519	98415	Nucks1	3.23314	3.30803	FALSE	FALSE
NM_022323	25	18	64113	Moap1	1.99661	1.84814	FALSE	FALSE
NM_026169	92	104	67457	Frmd8	2.56245	2.6099	FALSE	FALSE
NM_013464	22	46	11622	Ahr	1.94109	2.25562	FALSE	FALSE
NM_177128	11	24	320299	Iqcb1	1.64006	1.97308	FALSE	FALSE
NM_175423	210	313	109305	Orai1	2.92089	3.08841	FALSE	FALSE
NM_026899	414	522	68991	Ssu72	3.21567	3.31054	FALSE	FALSE
NM_001199187	32	51	69090	Ascc1	2.10382	2.30044	FALSE	FALSE
NM_029094	69	72	74769	Pik3cb	2.43751	2.4502	FALSE	FALSE
NM_030225	384	589	78920	Dlst	3.183	3.36298	FALSE	FALSE
NM_029623	137	98	76482	3110002H16Rik	2.73539	2.58409	FALSE	FALSE
NM_001081471	17	22	668178	Mettl7a3	1.82911	1.93529	FALSE	FALSE
NM_009272	217	174	20810	Srm	2.93513	2.83341	FALSE	FALSE
NM_026055	1043	1185	67248	Rpl39	3.61695	3.66658	FALSE	FALSE
NM_008688	70	100	18029	Nfic	2.44376	2.59286	FALSE	FALSE
NM_001252455	26	32	19280	Ptprs	2.01364	2.09801	FALSE	FALSE
NM_001177402	29	23	68554	Cebpzos	2.06106	1.95459	FALSE	FALSE
NM_008828	8292	4887	18655	Pgk1	4.51733	4.28191	FALSE	FALSE
NM_001166596	2572	3519	276770	Eif5a	4.00894	4.13928	FALSE	FALSE
NM_139140	8	21	72572	Spats2	1.50176	1.91508	FALSE	FALSE
NM_013749	55	158	27279	Tnfrsf12a	2.33903	2.79152	FALSE	FALSE
NM_025533	143	88	66394	Nosip	2.754	2.53735	FALSE	FALSE
NM_009975	1036	1011	13001	Csnk2b	3.61403	3.59762	FALSE	FALSE
NM_012056	30	43	27055	Fkbp9	2.07579	2.22633	FALSE	FALSE
NM_199469	254	568	217365	Nploc4	3.0035	3.34721	FALSE	FALSE
NM_001164671	699	1671	15502	Dnaja1	3.44314	3.81584	FALSE	FALSE
NM_030250	89	170	52014	Nus1	2.54806	2.82331	FALSE	FALSE
NM_027412	46	30	70387	Ttc9c	2.26142	2.06999	FALSE	FALSE
NM_001253812	110	75	74195	Elp3	2.64006	2.46793	FALSE	FALSE
NM_013635	686	831	19027	Sypl	3.43499	3.51247	FALSE	FALSE
NM_026020	1530	2178	67186	Rplp2	3.78336	3.93092	FALSE	FALSE
NM_017370	59	73	15439	Hp	2.36952	2.45619	FALSE	FALSE
NM_025829	17	36	66892	Eif4e3	1.82911	2.14917	FALSE	FALSE
NM_008143	4595	6911	14694	Gnb2l1	4.26095	4.43241	FALSE	FALSE
NM_175935	110	88	68401	G6pc3	2.64006	2.53735	FALSE	FALSE
NM_001253715	111	144	110265	Msra	2.64399	2.75123	FALSE	FALSE
NM_001171053	84	133	116871	Mta3	2.52295	2.71672	FALSE	FALSE
NM_181796	27	33	14869	Gstp2	2.03003	2.11138	FALSE	FALSE
NM_001172117	809	870	15162	Hck	3.50661	3.53238	FALSE	FALSE
NM_133942	31	86	101476	Plekha1	2.09003	2.52736	FALSE	FALSE
NM_026914	319	372	69029	Smdt1	3.10246	3.16341	FALSE	FALSE
NM_001160019	506	585	208263	Tor1aip1	3.30282	3.36002	FALSE	FALSE
NM_001024922	142	93	234374	Ddx49	2.75095	2.56135	FALSE	FALSE
NM_026473	1039	1170	67951	Tubb6	3.61528	3.66105	FALSE	FALSE
NM_133212	303	245	170744	Tlr8	3.08011	2.98203	FALSE	FALSE
NM_011192	333	383	19192	Psme3	3.12111	3.17606	FALSE	FALSE
NM_027881	53	50	71720	Osbpl3	2.32294	2.29183	FALSE	FALSE
NM_013640	506	366	19171	Psmb10	3.30282	3.15635	FALSE	FALSE
NM_144517	39	53	67249	Tbc1d19	2.18973	2.31714	FALSE	FALSE
NM_013558	74	138	15482	Hspa1l	2.4679	2.73274	FALSE	FALSE
NM_001080995	6	14	74041	Ddias	1.37682	1.73899	FALSE	FALSE
NM_019765	29	74	56430	Clip1	2.06106	2.4621	FALSE	FALSE
NM_001164200	233	441	18749	Prkacb	2.96602	3.2373	FALSE	FALSE
NM_001164118	2378	1879	20719	Serpinb6a	3.97488	3.86679	FALSE	FALSE
NM_001039201	85	63	76987	Hdhd2	2.52808	2.39221	FALSE	FALSE
NM_001081383	9	31	231051	Kmt2c	1.55291	2.08423	FALSE	FALSE
NM_025717	56	129	66704	Rbm4b	2.34685	2.70345	FALSE	FALSE
NM_144931	74	134	234664	Nae1	2.4679	2.71997	FALSE	FALSE
NM_010241	36	61	14339	Aktip	2.15497	2.37819	FALSE	FALSE
NM_011462	34	93	20729	Spin1	2.13014	2.56135	FALSE	FALSE
NM_178598	4155	5274	21346	Tagln2	4.21724	4.31501	FALSE	FALSE
NM_001081109	3	18	231876	Lmtk2	1.07579	1.84814	FALSE	FALSE
NM_016791	74	99	18018	Nfatc1	2.4679	2.5885	FALSE	FALSE
NM_011332	33	102	20295	Ccl17	2.11718	2.60147	FALSE	FALSE
NM_019710	162	233	24061	Smc1a	2.80818	2.96022	FALSE	FALSE
NM_028394	44	47	72938	Hspb11	2.24212	2.26496	FALSE	FALSE
NM_010447	2875	3170	15382	Hnrnpa1	4.0573	4.09392	FALSE	FALSE
NM_008327	40	62	26388	Ifi202b	2.20073	2.38526	FALSE	FALSE
NM_001081075	32	22	70567	Fra10ac1	2.10382	1.93529	FALSE	FALSE
NM_198417	5	16	112415	C030039L03Rik	1.29764	1.79698	FALSE	FALSE
NM_027728	1	11	71233	Enkur	1	1.63426	FALSE	FALSE
NM_001033337	17	5	239570	Ttc38	1.82911	1.29183	FALSE	FALSE
NM_001168657	10	45	216233	Socs2	1.59867	2.24608	FALSE	FALSE
NM_175654	8910	15343	319156	Hist1h4d	4.54854	4.77878	FALSE	FALSE
NM_126166	27	27	142980	Tlr3	2.03003	2.02423	FALSE	FALSE
NM_001163641	47	60	84505	Setdb1	2.27076	2.37102	FALSE	FALSE
NM_008392	3962	5559	16365	Irg1	4.19658	4.33786	FALSE	FALSE
NM_001081000	112	80	15547	Trmt2a	2.64788	2.49595	FALSE	FALSE
NM_001110131	38	40	71722	Cic	2.17845	2.19492	FALSE	FALSE
NM_029454	35	43	52023	Pibf1	2.14273	2.22633	FALSE	FALSE
NM_146124	328	182	228359	Arhgap1	3.11454	2.85294	FALSE	FALSE
NM_011790	32	84	23807	Arih2	2.10382	2.51714	FALSE	FALSE
NM_001177709	128	145	228998	Arfgap1	2.70588	2.75423	FALSE	FALSE
NM_001159604	81	162	80912	Pum1	2.50715	2.80238	FALSE	FALSE
NM_012005	40	103	26896	Med14	2.20073	2.6057	FALSE	FALSE
NM_001253391	22	20	67472	Mtfr1	1.94109	1.89389	FALSE	FALSE
NM_010106	35278	54578	13627	Eef1a1	5.14617	5.32988	FALSE	FALSE
NM_001146161	345	548	18174	Slc11a2	3.13648	3.33165	FALSE	FALSE
NM_198026	19	16	230767	Iqcc	1.87742	1.79698	FALSE	FALSE
NM_021537	66	55	59041	Stk25	2.41821	2.33323	FALSE	FALSE
NM_011835	151	376	23924	Katna1	2.77764	3.16805	FALSE	FALSE
NM_001110265	26	21	22137	Ttk	2.01364	1.91508	FALSE	FALSE
NM_001159288	42	48	74522	Morc2a	2.22192	2.27411	FALSE	FALSE
NM_013684	64	95	21374	Tbp	2.40485	2.57059	FALSE	FALSE
NM_009823	20	53	12396	Cbfa2t2	1.8997	2.31714	FALSE	FALSE
NM_001199248	98	159	81601	Kat5	2.58989	2.79426	FALSE	FALSE
NM_009764	17	40	12189	Brca1	1.82911	2.19492	FALSE	FALSE
NM_001168536	9	13	71891	Cdadc1	1.55291	1.70681	FALSE	FALSE
NM_025898	535	648	108124	Napa	3.32702	3.40444	FALSE	FALSE
NM_009193	175	226	20492	Slbp	2.8417	2.94697	FALSE	FALSE
NM_023320	76	106	67220	Plekho1	2.47948	2.61817	FALSE	FALSE
NM_053194	121	104	101489	Ric8	2.68145	2.6099	FALSE	FALSE
NM_013763	92	45	27368	Tbl2	2.56245	2.24608	FALSE	FALSE
NM_028956	61	82	74467	Pus10	2.384	2.50668	FALSE	FALSE
NM_010559	180	507	16194	Il6ra	2.85394	3.29787	FALSE	FALSE
NM_001142411	15	22	245174	Zfp937	1.77476	1.93529	FALSE	FALSE
NM_133991	54	46	54632	Ftsj1	2.33106	2.25562	FALSE	FALSE
NM_134020	221	225	103694	Tmed4	2.94306	2.94505	FALSE	FALSE
NM_019927	84	176	23806	Arih1	2.52295	2.83838	FALSE	FALSE
NM_026402	220	462	67841	Atg3	2.94109	3.25751	FALSE	FALSE
NM_011840	15	34	23938	Map2k5	1.77476	2.12434	FALSE	FALSE
NM_028659	708	498	73830	Eif3k	3.4487	3.29009	FALSE	FALSE
NM_013507	1028	2237	13690	Eif4g2	3.61066	3.94253	FALSE	FALSE
NM_145370	250	198	209318	Gps1	2.99661	2.88953	FALSE	FALSE
NM_177353	19	16	236727	Slc9a7	1.87742	1.79698	FALSE	FALSE
NM_001008425	147	117	386612	Thoc6	2.76598	2.66105	FALSE	FALSE
NM_001077687	10	15	80877	Lrba	1.59867	1.76896	FALSE	FALSE
NM_026688	294	281	68349	Ndufs3	3.06701	3.04157	FALSE	FALSE
NM_001252288	219	201	18293	Ogdh	2.93911	2.89606	FALSE	FALSE
NM_138756	71	120	192287	Slc25a36	2.44992	2.67205	FALSE	FALSE
NM_028545	38	22	73458	1700055N04Rik	2.17845	1.93529	FALSE	FALSE
NM_029546	93	75	110816	Pwp2	2.56715	2.46793	FALSE	FALSE
NM_019992	1462	1916	56792	Stap1	3.76361	3.87526	FALSE	FALSE
NM_025326	236	152	66058	Tmem176a	2.97158	2.77471	FALSE	FALSE
NM_026828	22	26	52838	Dnlz	1.94109	2.00784	FALSE	FALSE
NM_001165935	25	40	74268	Aven	1.99661	2.19492	FALSE	FALSE
NM_001243053	174	103	12036	Bcat2	2.83922	2.6057	FALSE	FALSE
NM_139063	25	20	17828	Bloc1s5	1.99661	1.89389	FALSE	FALSE
NM_001163159	99	104	13026	Pcyt1a	2.5943	2.6099	FALSE	FALSE
NM_025476	42	39	66302	Rmdn1	2.22192	2.18393	FALSE	FALSE
NM_029652	111	342	207952	Klhl25	2.64399	3.12689	FALSE	FALSE
NM_021793	7	16	60455	Tmem8	1.44376	1.79698	FALSE	FALSE
NM_026613	25	33	68201	Ccdc34	1.99661	2.11138	FALSE	FALSE
NM_001164734	21	63	56524	Mpp6	1.92089	2.39221	FALSE	FALSE
NM_008187	45	42	14894	Cfap20	2.25188	2.21611	FALSE	FALSE
NM_145969	40	60	211922	Dennd6a	2.20073	2.37102	FALSE	FALSE
NM_011949	693	796	26413	Mapk1	3.4394	3.49378	FALSE	FALSE
NM_009658	882	891	11677	Akr1b3	3.54413	3.54274	FALSE	FALSE
NM_019668	421	713	22209	Ube2a	3.22295	3.44595	FALSE	FALSE
NM_023355	24	22	56322	Timm22	1.97888	1.93529	FALSE	FALSE
NM_177832	6	15	329002	Zfp236	1.37682	1.76896	FALSE	FALSE
NM_026143	227	197	67420	Far1	2.95469	2.88733	FALSE	FALSE
NM_025542	523	797	66404	Rtfdc1	3.31717	3.49432	FALSE	FALSE
NM_001252543	299	386	27054	Sec23b	3.07434	3.17945	FALSE	FALSE
NM_001038664	28	20	14710	Gngt2	2.04582	1.89389	FALSE	FALSE
NM_172769	154	315	235293	Sc5d	2.78619	3.09118	FALSE	FALSE
NM_027777	12	16	71382	Pex1	1.67785	1.79698	FALSE	FALSE
NM_146036	502	930	217737	Ahsa1	3.29937	3.56135	FALSE	FALSE
NM_001039511	28	22	117198	Ivns1abp	2.04582	1.93529	FALSE	FALSE
NM_144791	302	323	208263	Tor1aip1	3.07867	3.10207	FALSE	FALSE
NM_001170869	54	50	78428	Wibg	2.33106	2.29183	FALSE	FALSE
NM_009089	158	272	20020	Polr2a	2.79732	3.02743	FALSE	FALSE
NM_010421	1941	4077	15211	Hexa	3.88669	4.20321	FALSE	FALSE
NM_013499	563	955	12946	Cr1l	3.34917	3.57287	FALSE	FALSE
NM_001080748	64	70	14886	Gtf2i	2.40485	2.43796	FALSE	FALSE
NM_024215	58	52	68040	Zfp593	2.36209	2.30887	FALSE	FALSE
NM_001013366	71	80	101240	Wdr91	2.44992	2.49595	FALSE	FALSE
NM_133887	381	461	100226	Stx12	3.17959	3.25657	FALSE	FALSE
NM_001001295	20	26	213550	Dis3l	1.8997	2.00784	FALSE	FALSE
NM_001025617	23	68	76025	Cant1	1.96039	2.42537	FALSE	FALSE
NM_001024526	323	487	207214	Larp4	3.10787	3.28039	FALSE	FALSE
NM_001200023	17	13	620419	Zfp963	1.82911	1.70681	FALSE	FALSE
NM_029999	10	18	77889	Lbh	1.59867	1.84814	FALSE	FALSE
NM_024181	125	169	66861	Dnajc10	2.69558	2.82075	FALSE	FALSE
NM_144874	99	96	226139	Cox15	2.5943	2.57514	FALSE	FALSE
NM_177249	117	296	74996	Usp47	2.66685	3.06416	FALSE	FALSE
NM_001048227	19	32	52840	Dbndd2	1.87742	2.09801	FALSE	FALSE
NM_001080924	5	13	407821	Znrf3	1.29764	1.70681	FALSE	FALSE
NM_181279	155	150	107976	Bre	2.789	2.76896	FALSE	FALSE
NM_001164147	10	12	21423	Tcf3	1.59867	1.67205	FALSE	FALSE
NM_024260	50	47	73288	Ccdc132	2.29764	2.26496	FALSE	FALSE
NM_133832	6	21	98711	Rdh10	1.37682	1.91508	FALSE	FALSE
NM_207207	63	56	99045	Mrps26	2.39801	2.34105	FALSE	FALSE
NM_008019	439	455	14225	Fkbp1a	3.24113	3.25088	FALSE	FALSE
NM_001199308_dup1	26	24	NA	NA	2.01364	1.97308	FALSE	FALSE
NM_021322	21	36	57773	Wdr4	1.92089	2.14917	FALSE	FALSE
NM_011530	174	228	21355	Tap2	2.83922	2.9508	FALSE	FALSE
NM_001172092	32	50	76131	Depdc1a	2.10382	2.29183	FALSE	FALSE
NM_009456	1295	1456	22195	Ube2l3	3.71094	3.75603	FALSE	FALSE
NM_009229	46	63	20650	Sntb2	2.26142	2.39221	FALSE	FALSE
NM_027193	82	157	69740	Dph5	2.51248	2.78876	FALSE	FALSE
NM_133708	143	102	69080	Gmppa	2.754	2.60147	FALSE	FALSE
NM_009096	3830	5552	20104	Rps6	4.18186	4.33731	FALSE	FALSE
NM_001163836	13	26	67543	Pabpc6	1.71261	2.00784	FALSE	FALSE
NM_001081354	60	216	333639	Mamld1	2.37682	2.92732	FALSE	FALSE
NM_001256033	31	50	73945	Otud4	2.09003	2.29183	FALSE	FALSE
NM_031406	47	27	83704	Slc12a9	2.27076	2.02423	FALSE	FALSE
NM_001039151	10213	28424	12505	Cd44	4.60782	5.04655	FALSE	FALSE
NM_001122765	195	200	64383	Sirt2	2.8887	2.89389	FALSE	FALSE
NM_144801	15	18	70209	Tmem143	1.77476	1.84814	FALSE	FALSE
NM_177256	35	76	320769	Prdx6b	2.14273	2.47368	FALSE	FALSE
NM_021384	1314	2719	58185	Rsad2	3.71726	4.02727	FALSE	FALSE
NM_001101804_dup3	61	53	NA	NA	2.384	2.31714	FALSE	FALSE
NM_181266	55	85	104348	Zfp120	2.33903	2.52228	FALSE	FALSE
NM_011552	89	83	21453	Tcof1	2.54806	2.51194	FALSE	FALSE
NM_133919	204	424	17355	Aff1	2.9083	3.22023	FALSE	FALSE
NM_019408	511	1491	18034	Nfkb2	3.30709	3.76634	FALSE	FALSE
NM_001081259	65	136	226844	Mfsd7b	2.41158	2.7264	FALSE	FALSE
NM_207214	69	187	105504	Exoc5	2.43751	2.86471	FALSE	FALSE
NM_001177730	33	22	22259	Nr1h3	2.11718	1.93529	FALSE	FALSE
NM_010317	10	15	14706	Gng4	1.59867	1.76896	FALSE	FALSE
NM_016980	3821	6095	100503670	Rpl5	4.18084	4.37784	FALSE	FALSE
NM_009584	61	84	22791	Dnajc2	2.384	2.51714	FALSE	FALSE
NM_001145779	62	120	16563	Kif2a	2.39106	2.67205	FALSE	FALSE
NM_021429	46	37	58240	Hs1bp3	2.26142	2.16107	FALSE	FALSE
NM_024471	66	87	79464	Lias	2.41821	2.53238	FALSE	FALSE
NM_025692	166	165	66663	Uba5	2.81877	2.81035	FALSE	FALSE
NM_001033236	14	24	207965	Vcpkmt	1.74479	1.97308	FALSE	FALSE
NM_001252316	165	119	108037	Shmt2	2.81615	2.66841	FALSE	FALSE
NM_001199020	18	25	52477	Angel2	1.85394	1.9908	FALSE	FALSE
NM_001164059	3	18	20343	Sell	1.07579	1.84814	FALSE	FALSE
NM_028017	166	143	108123	Napg	2.81877	2.7482	FALSE	FALSE
NM_001173550	4531	4782	12273	C5ar1	4.25486	4.27247	FALSE	FALSE
NM_011721	15	29	22427	Wrn	1.77476	2.05526	FALSE	FALSE
NM_027764	12	16	71330	Rcbtb1	1.67785	1.79698	FALSE	FALSE
NM_146003	14	38	215351	Senp6	1.74479	2.17265	FALSE	FALSE
NM_001105667	58	89	21915	Dtymk	2.36209	2.54225	FALSE	FALSE
NM_001162938	92	138	100033459	Pydc3	2.56245	2.73274	FALSE	FALSE
NM_001122992	35	68	56809	Gmeb1	2.14273	2.42537	FALSE	FALSE
NM_172585	222	594	217980	Larp4b	2.94502	3.36665	FALSE	FALSE
NM_029502	23	68	76025	Cant1	1.96039	2.42537	FALSE	FALSE
NM_026194	77	67	67490	Ufl1	2.48516	2.41894	FALSE	FALSE
NM_011369	79	140	20419	Shcbp1	2.49629	2.73899	FALSE	FALSE
NM_026341	42	29	67725	Nudt13	2.22192	2.05526	FALSE	FALSE
NM_025362	46	34	66114	Dnajc30	2.26142	2.12434	FALSE	FALSE
NM_008907	11491	10999	268373	Ppia	4.65902	4.63422	FALSE	FALSE
NM_010726	151	132	16922	Phyh	2.77764	2.71344	FALSE	FALSE
NM_025432	80	79	66226	Trappc2	2.50176	2.49049	FALSE	FALSE
NM_008446	43	74	16571	Kif4	2.23213	2.4621	FALSE	FALSE
NM_015800	14	33	50766	Crim1	1.74479	2.11138	FALSE	FALSE
NM_001008506	43	102	75553	Zc3h14	2.23213	2.60147	FALSE	FALSE
NM_011905	1246	2472	24088	Tlr2	3.69418	3.98591	FALSE	FALSE
NM_134125	70	173	106628	Trip10	2.44376	2.83091	FALSE	FALSE
NM_173018	14	8	270163	Myo9a	1.74479	1.49595	FALSE	FALSE
NM_145925	256	284	108705	Pttg1ip	3.00691	3.04618	FALSE	FALSE
NM_009614	300	635	11490	Adam15	3.07579	3.39564	FALSE	FALSE
NM_001166501	13	43	329260	Dennd1b	1.71261	2.22633	FALSE	FALSE
NM_173450	17	9	271842	Rpusd2	1.82911	1.54711	FALSE	FALSE
NM_001205367	1220	1816	235072	2016-09-07	3.68503	3.85198	FALSE	FALSE
NM_172967	19	7	269033	4930503L19Rik	1.87742	1.43796	FALSE	FALSE
NM_134091	21	7	105835	Sgsm3	1.92089	1.43796	FALSE	FALSE
NM_025995	59	57	67141	Fbxo5	2.36952	2.34874	FALSE	FALSE
NM_001163160	99	104	13026	Pcyt1a	2.5943	2.6099	FALSE	FALSE
NM_183167	41	67	233168	AI987944	2.21145	2.41894	FALSE	FALSE
NM_027324	113	102	14057	Sfxn1	2.65174	2.60147	FALSE	FALSE
NM_011220	32	51	19286	Pts	2.10382	2.30044	FALSE	FALSE
NM_001199204	163	638	70834	Spag9	2.81085	3.39769	FALSE	FALSE
NM_029371	34	42	72459	Htatsf1	2.13014	2.21611	FALSE	FALSE
NM_001037997	61	69	14158	Fert2	2.384	2.43171	FALSE	FALSE
NM_134150	502	361	107260	Otub1	3.29937	3.15037	FALSE	FALSE
NM_028242	34	42	72459	Htatsf1	2.13014	2.21611	FALSE	FALSE
NM_007616	348	495	12389	Cav1	3.14025	3.28747	FALSE	FALSE
NM_145468	30	23	27401	Skp2	2.07579	1.95459	FALSE	FALSE
NM_018757	29	7	54369	Nme6	2.06106	1.43796	FALSE	FALSE
NM_145950	87	300	209212	Osgin2	2.53819	3.06999	FALSE	FALSE
NM_011970	929	878	26445	Psmb2	3.56668	3.53636	FALSE	FALSE
NM_010515	564	1414	16004	Igf2r	3.34994	3.74331	FALSE	FALSE
NM_001163476	25	23	69270	Gins1	1.99661	1.95459	FALSE	FALSE
NM_053217	223	388	112419	2010002M12Rik	2.94697	3.1817	FALSE	FALSE
NM_001099319	30	29	100039968	Gm12942	2.07579	2.05526	FALSE	FALSE
NM_170590	119	158	266692	Cpne1	2.67421	2.79152	FALSE	FALSE
NM_001081633	39	64	27886	Dgcr14	2.18973	2.39904	FALSE	FALSE
NM_011673	117	491	22234	Ugcg	2.66685	3.28395	FALSE	FALSE
NM_008521	43	62	17001	Ltc4s	2.23213	2.38526	FALSE	FALSE
NM_001037759	135	157	170755	Sgk3	2.729	2.78876	FALSE	FALSE
NM_001110193	423	376	16331	Inpp5d	3.22501	3.16805	FALSE	FALSE
NM_001037922	13	13	624855	Cks1brt	1.71261	1.70681	FALSE	FALSE
NM_001198913	276	371	16800	Arhgef2	3.03957	3.16224	FALSE	FALSE
NM_001163542	739	1327	18810	Plec	3.46731	3.71574	FALSE	FALSE
NM_023409	4036	3771	67963	Npc2	4.20462	4.16932	FALSE	FALSE
NM_144908	6	13	231050	Galnt11	1.37682	1.70681	FALSE	FALSE
NM_010560	103	206	16195	Il6st	2.6115	2.90673	FALSE	FALSE
NM_153153	13	21	225115	Svil	1.71261	1.91508	FALSE	FALSE
NM_198619	22	33	242747	Zfp933	1.94109	2.11138	FALSE	FALSE
NM_001130151	142	190	16801	Arhgef1	2.75095	2.87162	FALSE	FALSE
NM_001253863	53	84	21406	Tcf12	2.32294	2.51714	FALSE	FALSE
NM_001252059	3	21	12286	Cacna1a	1.07579	1.91508	FALSE	FALSE
NM_009786	312	427	12301	Cacybp	3.09282	3.22329	FALSE	FALSE
NM_030715	49	63	80905	Polh	2.28886	2.39221	FALSE	FALSE
NM_021498	74	104	59001	Pole3	2.4679	2.6099	FALSE	FALSE
NM_025641	247	196	66576	Uqcrh	2.99136	2.88512	FALSE	FALSE
NM_001172148	26	29	237073	Rbm41	2.01364	2.05526	FALSE	FALSE
NM_133933	756	1111	103963	Rpn1	3.47719	3.63858	FALSE	FALSE
NM_022309	160	216	12400	Cbfb	2.80279	2.92732	FALSE	FALSE
NM_009412	427	722	21985	Tpd52	3.22909	3.4514	FALSE	FALSE
NM_018869	14	53	14773	Grk5	1.74479	2.31714	FALSE	FALSE
NM_001085501	12	11	228966	Ppp1r3d	1.67785	1.63426	FALSE	FALSE
NM_008020	202	294	14227	Fkbp2	2.90402	3.06121	FALSE	FALSE
NM_001113383	196	390	14660	Gls	2.89092	3.18393	FALSE	FALSE
NM_172725	34	28	231855	Ap5z1	2.13014	2.04002	FALSE	FALSE
NM_138679	34	86	192195	Ash1l	2.13014	2.52736	FALSE	FALSE
NM_029609	38	74	76429	Lhpp	2.17845	2.4621	FALSE	FALSE
NM_001081417	14	29	320790	Chd7	1.74479	2.05526	FALSE	FALSE
NM_009298	90	185	20935	Surf6	2.55291	2.86004	FALSE	FALSE
NM_001270495	32	43	100039257	Tmem254b	2.10382	2.22633	FALSE	FALSE
NM_001013256	21	25	68964	Ctc1	1.92089	1.9908	FALSE	FALSE
NM_133757	155	395	74451	Pgs1	2.789	3.18946	FALSE	FALSE
NM_028071	1702	1938	72042	Cotl1	3.82963	3.88022	FALSE	FALSE
NM_001113527	38	33	57444	Isg20	2.17845	2.11138	FALSE	FALSE
NM_029775	147	463	76863	Dcun1d5	2.76598	3.25845	FALSE	FALSE
NM_021876	186	412	13626	Eed	2.86818	3.20776	FALSE	FALSE
NM_001193303	512	833	110829	Lims1	3.30794	3.51351	FALSE	FALSE
NM_001098837	13	15	217218	Atxn7l3	1.71261	1.76896	FALSE	FALSE
NM_008899	4	13	18992	Pou3f2	1.20073	1.70681	FALSE	FALSE
NM_181424	19	6	52856	Mtg2	1.87742	1.37102	FALSE	FALSE
NM_001079876	95	167	237436	Gas2l3	2.57639	2.81558	FALSE	FALSE
NM_028291	31	85	72587	Pan3	2.09003	2.52228	FALSE	FALSE
NM_007645	847	1018	12493	Cd37	3.52655	3.60061	FALSE	FALSE
NM_027799	71	159	71452	Ankrd40	2.44992	2.79426	FALSE	FALSE
NM_145437	170	163	217305	Cd300ld	2.82911	2.80505	FALSE	FALSE
NM_026521	110	122	68036	Zfp706	2.64006	2.67922	FALSE	FALSE
NM_008204	241	790	14990	H2-M2	2.98068	3.49049	FALSE	FALSE
NM_153197	119	83	73149	Clec4a3	2.67421	2.51194	FALSE	FALSE
NM_001085493	28	31	76947	Ndufaf6	2.04582	2.08423	FALSE	FALSE
NM_001161823	115	196	230674	Kdm4a	2.65936	2.88512	FALSE	FALSE
NM_001025262	440	748	21985	Tpd52	3.24212	3.46677	FALSE	FALSE
NM_001163425	143	87	66915	Myeov2	2.754	2.53238	FALSE	FALSE
NM_153056	85	79	209011	Sirt7	2.52808	2.49049	FALSE	FALSE
NM_001164226	36	41	18181	Nrf1	2.15497	2.20565	FALSE	FALSE
NM_011602	1158	1222	21894	Tln1	3.66237	3.67994	FALSE	FALSE
NM_133869	358	406	99712	Cept1	3.15255	3.20139	FALSE	FALSE
NM_001024849	67	56	329575	Gm14325	2.42474	2.34105	FALSE	FALSE
NM_007630	239	264	12442	Ccnb2	2.97706	3.01447	FALSE	FALSE
NM_001163591	61	214	74732	Stx11	2.384	2.92328	FALSE	FALSE
NM_001017968	18	58	503610	Zdhhc18	1.85394	2.35629	FALSE	FALSE
NM_001166480	678	769	20832	Ssr4	3.4299	3.47879	FALSE	FALSE
NM_001163300	83	156	224903	Safb	2.51774	2.78599	FALSE	FALSE
NM_010227	1575	1449	192176	Flna	3.79595	3.75393	FALSE	FALSE
NM_011488	168	503	20850	Stat5a	2.82398	3.29443	FALSE	FALSE
NM_001163018	80	208	52615	Suz12	2.50176	2.91093	FALSE	FALSE
NM_144896	13	38	229487	Gatb	1.71261	2.17265	FALSE	FALSE
NM_153489	431	628	74383	Ubap2l	3.23314	3.39082	FALSE	FALSE
NM_146201	6	17	233887	Zfp553	1.37682	1.82331	FALSE	FALSE
NM_001163450	18	40	30957	Mapk8ip3	1.85394	2.19492	FALSE	FALSE
NM_019736	242	340	56360	Acot9	2.98248	3.12434	FALSE	FALSE
NM_001077360	102	197	26431	Git2	2.60727	2.88733	FALSE	FALSE
NM_001177626	53	94	13605	Ect2	2.32294	2.56599	FALSE	FALSE
NM_001029855	1341	1752	19188	Psme2	3.72609	3.8364	FALSE	FALSE
NM_007454	384	306	11764	Ap1b1	3.183	3.07859	FALSE	FALSE
NM_016676	540	1003	19325	Rab10	3.33106	3.59417	FALSE	FALSE
NM_028127	50	203	319710	Frmd6	2.29764	2.90036	FALSE	FALSE
NM_145158	255	600	246707	Emilin2	3.00521	3.37102	FALSE	FALSE
NM_023294	103	139	67052	Ndc80	2.6115	2.73588	FALSE	FALSE
NM_025748	23	32	66757	Adat2	1.96039	2.09801	FALSE	FALSE
NM_023423	264	577	68050	Akirin1	3.02027	3.35404	FALSE	FALSE
NM_175034	38	53	317750	Slc24a5	2.17845	2.31714	FALSE	FALSE
NM_173047	31	22	109857	Cbr3	2.09003	1.93529	FALSE	FALSE
NM_027236	41	37	69860	Eif1ad	2.21145	2.16107	FALSE	FALSE
NM_145994	671	1674	11308	Abi1	3.42539	3.81662	FALSE	FALSE
NM_028475	410	619	74383	Ubap2l	3.21145	3.38456	FALSE	FALSE
NM_001136496	21	19	71508	Zfp935	1.92089	1.87162	FALSE	FALSE
NM_009579	36	55	22782	Slc30a1	2.15497	2.33323	FALSE	FALSE
NM_016742	563	819	12539	Cdc37	3.34917	3.50615	FALSE	FALSE
NM_011343	1052	1253	20335	Sec61g	3.62068	3.69082	FALSE	FALSE
NM_001085408	27	59	68112	Sdccag3	2.03003	2.36372	FALSE	FALSE
NM_001146222	102	101	66310	Dpy30	2.60727	2.59719	FALSE	FALSE
NM_001080388	114	324	13728	Mark2	2.65557	3.10341	FALSE	FALSE
NM_010191	94	125	14137	Fdft1	2.57179	2.68977	FALSE	FALSE
NM_023647	95	124	93790	Nipa2	2.57639	2.68629	FALSE	FALSE
NM_001205095	43	89	240038	Gm4944	2.23213	2.54225	FALSE	FALSE
NM_001163627	36	32	73942	Fam151b	2.15497	2.09801	FALSE	FALSE
NM_008961	43	39	19212	Pter	2.23213	2.18393	FALSE	FALSE
NM_010700	253	631	16835	Ldlr	3.00179	3.39289	FALSE	FALSE
NM_001025587	47	42	75692	Nr2c2ap	2.27076	2.21611	FALSE	FALSE
NM_025924	35	81	67031	Upf3a	2.14273	2.50135	FALSE	FALSE
NM_008378	123	121	16210	Impact	2.68857	2.67565	FALSE	FALSE
NM_010418	29	48	15204	Herc2	2.06106	2.27411	FALSE	FALSE
NM_001035525	37	32	100317	AU040320	2.16687	2.09801	FALSE	FALSE
NM_007653	3770	7322	12512	Cd63	4.17501	4.45749	FALSE	FALSE
NM_020566	23	22	57431	Dnajc4	1.96039	1.93529	FALSE	FALSE
NM_001159616	35	72	56176	Pigp	2.14273	2.4502	FALSE	FALSE
NM_001039169	273	249	26987	Eif4e2	3.03483	2.98906	FALSE	FALSE
NM_144839	45	75	218793	Ube2e2	2.25188	2.46793	FALSE	FALSE
NM_001080969	21	31	66628	Thg1l	1.92089	2.08423	FALSE	FALSE
NM_153062	6	13	224674	Slc37a1	1.37682	1.70681	FALSE	FALSE
NM_011508	2591	5557	20918	Eif1	4.01213	4.33771	FALSE	FALSE
NM_133187	17	28	68659	Fam198b	1.82911	2.04002	FALSE	FALSE
NM_001008705	223	371	231889	Bud31	2.94697	3.16224	FALSE	FALSE
NM_010235	40	55	14283	Fosl1	2.20073	2.33323	FALSE	FALSE
NM_028791	214	255	74157	Cmtr1	2.92908	2.99941	FALSE	FALSE
NM_172540	24	33	215201	Trmt2b	1.97888	2.11138	FALSE	FALSE
NM_030026	16	19	78038	Mccc2	1.80279	1.87162	FALSE	FALSE
NM_001136071	469	685	16985	Lsp1	3.26984	3.42856	FALSE	FALSE
NM_019702	45	59	56422	Hbs1l	2.25188	2.36372	FALSE	FALSE
NM_001029843	115	180	22367	Vrk1	2.65936	2.84814	FALSE	FALSE
NM_001040396	274	396	69227	Selt	3.03642	3.19056	FALSE	FALSE
NM_007420	39	51	11555	Adrb2	2.18973	2.30044	FALSE	FALSE
NM_001037761	1698	2439	12345	Capzb	3.8286	3.98008	FALSE	FALSE
NM_201392	690	1228	18810	Plec	3.43751	3.68206	FALSE	FALSE
NM_010763	11	21	17156	Man1a2	1.64006	1.91508	FALSE	FALSE
NM_001166650	12	20	208968	Zfp280c	1.67785	1.89389	FALSE	FALSE
NM_008403	42	40	16413	Itgb1bp1	2.22192	2.19492	FALSE	FALSE
NM_023149	1592	1588	66054	Cndp2	3.80061	3.79372	FALSE	FALSE
NM_001008543	132	476	17859	Mxi1	2.71924	3.27047	FALSE	FALSE
NM_023431	14	18	68114	Mum1	1.74479	1.84814	FALSE	FALSE
NM_011290	4562	4941	19988	Rpl6	4.25782	4.28668	FALSE	FALSE
NM_001166456	151	344	105727	Slc38a1	2.77764	3.12942	FALSE	FALSE
NM_030093	15	7	78372	Snrnp25	1.77476	1.43796	FALSE	FALSE
NM_007806	2629	4220	13057	Cyba	4.01846	4.21818	FALSE	FALSE
NM_175646	14	8	234723	Txnl4b	1.74479	1.49595	FALSE	FALSE
NM_001168223	157	353	70809	Clec2g	2.79457	3.14064	FALSE	FALSE
NM_001205083	94	181	20778	Scarb1	2.57179	2.85054	FALSE	FALSE
NM_001163635	50	117	74493	Tnks2	2.29764	2.66105	FALSE	FALSE
NM_001164289	87	105	628705	Phf11c	2.53819	2.61405	FALSE	FALSE
NM_001044389	41	77	270166	Clpx	2.21145	2.47936	FALSE	FALSE
NM_025950	23	30	67072	Cdc37l1	1.96039	2.06999	FALSE	FALSE
NM_008384	14	24	16329	Inpp1	1.74479	1.97308	FALSE	FALSE
NM_027927	166	317	71793	Ints12	2.81877	3.09392	FALSE	FALSE
NM_024258	48	132	74112	Usp16	2.27991	2.71344	FALSE	FALSE
NM_001110145	803	1309	20823	Ssb	3.50338	3.7098	FALSE	FALSE
NM_001256133	89	123	93790	Nipa2	2.54806	2.68277	FALSE	FALSE
NM_009000	51	78	19336	Rab24	2.30624	2.48496	FALSE	FALSE
NM_019870	113	96	56292	Naa10	2.65174	2.57514	FALSE	FALSE
NM_001166539	469	581	15361	Hmga1	3.26984	3.35704	FALSE	FALSE
NM_177824	20	4	328829	9830107B12Rik	1.8997	1.19492	FALSE	FALSE
NM_022331	260	653	64209	Herpud1	3.01364	3.40778	FALSE	FALSE
NM_026177	119	226	67467	Gpalpp1	2.67421	2.94697	FALSE	FALSE
NM_025554	152	182	66420	Polr2e	2.78051	2.85294	FALSE	FALSE
NM_008708	26	33	18108	Nmt2	2.01364	2.11138	FALSE	FALSE
NM_001099348_dup1	38	59	NA	NA	2.17845	2.36372	FALSE	FALSE
NM_001033192	10	26	97863	C78339	1.59867	2.00784	FALSE	FALSE
NM_030563	132	361	80750	N4bp1	2.71924	3.15037	FALSE	FALSE
NM_018851	652	659	56045	Samhd1	3.41291	3.41175	FALSE	FALSE
NM_010118	334	720	13654	Egr2	3.12241	3.4502	FALSE	FALSE
NM_175149	51	42	69551	2310022B05Rik	2.30624	2.21611	FALSE	FALSE
NM_181854	93	72	101994	Champ1	2.56715	2.4502	FALSE	FALSE
NM_026887	88	171	108012	Ap1s2	2.54315	2.82586	FALSE	FALSE
NM_001141976	176	262	72119	Tpx2	2.84418	3.01117	FALSE	FALSE
NM_001130529	3	17	268417	Zkscan17	1.07579	1.82331	FALSE	FALSE
NM_030233	28	30	78935	Saal1	2.04582	2.06999	FALSE	FALSE
NM_178185_dup1	7646	11923	NA	NA	4.4821	4.66925	FALSE	FALSE
NM_029631	29	20	76491	Abhd14b	2.06106	1.89389	FALSE	FALSE
NM_026043	23	47	67225	Rnpc3	1.96039	2.26496	FALSE	FALSE
NM_031201	150	164	22122	Tsta3	2.77476	2.80771	FALSE	FALSE
NM_009817	326	416	12380	Cast	3.11188	3.21196	FALSE	FALSE
NM_001252443	551	564	21787	Tfg	3.33982	3.34414	FALSE	FALSE
NM_029349	48	76	227446	2310035C23Rik	2.27991	2.47368	FALSE	FALSE
NM_019566	988	2593	56212	Rhog	3.59342	4.00667	FALSE	FALSE
NM_031869	132	173	19079	Prkab1	2.71924	2.83091	FALSE	FALSE
NM_001164793	11	38	28015	Polr2m	1.64006	2.17265	FALSE	FALSE
NM_007572	2712	4124	12259	C1qa	4.03196	4.20818	FALSE	FALSE
NM_001170907	70	109	56404	Trip4	2.44376	2.63029	FALSE	FALSE
NM_001033448	43	35	381201	Ap5b1	2.23213	2.13693	FALSE	FALSE
NM_025521	55	30	66374	2310011J03Rik	2.33903	2.06999	FALSE	FALSE
NM_178087	105	94	18854	Pml	2.61986	2.56599	FALSE	FALSE
NM_001171034	3565	3554	110213	Tmbim6	4.15073	4.14358	FALSE	FALSE
NM_183423	10	16	66350	Pla2g12a	1.59867	1.79698	FALSE	FALSE
NM_009963	5	18	12953	Cry2	1.29764	1.84814	FALSE	FALSE
NM_181821	52	67	353502	Hcfc1r1	2.31467	2.41894	FALSE	FALSE
NM_199477	15	28	393082	Mettl7a2	1.77476	2.04002	FALSE	FALSE
NM_198654	40	47	381318	Nsl1	2.20073	2.26496	FALSE	FALSE
NM_001167730	72	227	58186	Rad18	2.456	2.94889	FALSE	FALSE
NM_001081975	160	227	100034361	Mfap1b	2.80279	2.94889	FALSE	FALSE
NM_008090	8	20	14461	Gata2	1.50176	1.89389	FALSE	FALSE
NM_145832	56	34	228368	Slc35c1	2.34685	2.12434	FALSE	FALSE
NM_011852	620	608	23960	Oas1g	3.39106	3.37677	FALSE	FALSE
NM_001033534	28	40	244864	Layn	2.04582	2.19492	FALSE	FALSE
NM_011135	48	101	18983	Cnot7	2.27991	2.59719	FALSE	FALSE
NM_028834	54	92	74243	Slx4ip	2.33106	2.55665	FALSE	FALSE
NM_001113355	687	1045	30930	Vps26a	3.43562	3.61198	FALSE	FALSE
NM_008601	424	1212	17342	Mitf	3.22603	3.67637	FALSE	FALSE
NM_031182	14	7	83383	Tfap4	1.74479	1.43796	FALSE	FALSE
NM_145362	79	132	208211	Alg1	2.49629	2.71344	FALSE	FALSE
NM_172144	5	20	235542	Ppp2r3a	1.29764	1.89389	FALSE	FALSE
NM_148952	64	124	104394	E2f4	2.40485	2.68629	FALSE	FALSE
NM_177367	29	23	276919	Gemin4	2.06106	1.95459	FALSE	FALSE
NM_025837	59	30	110119	Mpi	2.36952	2.06999	FALSE	FALSE
NM_007998	47	84	14151	Fech	2.27076	2.51714	FALSE	FALSE
NM_001145820	144	174	14571	Gpd2	2.75703	2.83341	FALSE	FALSE
NM_026780	261	364	68592	Syf2	3.01531	3.15397	FALSE	FALSE
NM_001253703	37	80	229681	St7l	2.16687	2.49595	FALSE	FALSE
NM_001127363	8	21	212111	Inpp5a	1.50176	1.91508	FALSE	FALSE
NM_138748	290	273	110854	Ppp2r4	3.06106	3.02903	FALSE	FALSE
NM_001006664	37	45	13821	Epb4.1l1	2.16687	2.24608	FALSE	FALSE
NM_080555	110	250	67916	Ppap2b	2.64006	2.9908	FALSE	FALSE
NM_145528	28	36	51897	Atg13	2.04582	2.14917	FALSE	FALSE
NM_030691	1843	3006	80719	Igsf6	3.86419	4.07085	FALSE	FALSE
NM_133666	177	225	17995	Ndufv1	2.84664	2.94505	FALSE	FALSE
NM_026960	272	219	69146	Gsdmd	3.03323	2.93331	FALSE	FALSE
NM_018824	662	1101	54338	Slc23a2	3.41952	3.63465	FALSE	FALSE
NM_025338	160	215	66077	Aurkaip1	2.80279	2.9253	FALSE	FALSE
NM_001252061	6	18	12286	Cacna1a	1.37682	1.84814	FALSE	FALSE
NM_028841	18	15	74257	Tspan17	1.85394	1.76896	FALSE	FALSE
NM_001243067	31	45	73610	Zfp433	2.09003	2.24608	FALSE	FALSE
NM_025468	371	808	66286	Sec11c	3.16804	3.50028	FALSE	FALSE
NM_021886	21	53	26886	Cenph	1.92089	2.31714	FALSE	FALSE
NM_019773	87	172	56382	Rab9	2.53819	2.82839	FALSE	FALSE
NM_001025432	33	71	12914	Crebbp	2.11718	2.44412	FALSE	FALSE
NM_133851	195	270	108907	Nusap1	2.8887	3.02423	FALSE	FALSE
NM_009448	10303	9302	22146	Tuba1c	4.61163	4.56144	FALSE	FALSE
NM_027808	39	46	71481	Alpk1	2.18973	2.25562	FALSE	FALSE
NM_001081117	250	1066	17345	Mki67	2.99661	3.62062	FALSE	FALSE
NM_026270	44	41	67605	Akt1s1	2.24212	2.20565	FALSE	FALSE
NM_001114332	402	935	72472	Slc16a10	3.20289	3.56368	FALSE	FALSE
NM_001164191	117	166	17772	Mtm1	2.66685	2.81297	FALSE	FALSE
NM_028049	76	67	71999	Fbxo22	2.47948	2.41894	FALSE	FALSE
NM_001039392	441	370	19240	Tmsb10	3.2431	3.16107	FALSE	FALSE
NM_001013378	34	23	231915	Uspl1	2.13014	1.95459	FALSE	FALSE
NM_001045526	45	44	327957	Scimp	2.25188	2.23632	FALSE	FALSE
NM_001004143	190	150	216825	Usp22	2.87742	2.76896	FALSE	FALSE
NM_153387	33	54	51885	Tubgcp4	2.11718	2.32526	FALSE	FALSE
NM_183250	111	104	66167	Tma7	2.64399	2.6099	FALSE	FALSE
NM_001166430	1370	1763	98758	Hnrnpf	3.73539	3.83912	FALSE	FALSE
NM_009541	18	44	22642	Zbtb17	1.85394	2.23632	FALSE	FALSE
NM_001098227	4985	9433	53378	Sdcbp	4.29633	4.56751	FALSE	FALSE
NM_001159964	96	223	13858	Eps15	2.58094	2.94117	FALSE	FALSE
NM_144866	588	1513	225363	Etf1	3.36804	3.7727	FALSE	FALSE
NM_001166360	11	12	77877	6030458C11Rik	1.64006	1.67205	FALSE	FALSE
NM_001083810	78	257	72446	Prr5l	2.49076	3.0028	FALSE	FALSE
NM_001270537	168	102	668218	Bin2	2.82398	2.60147	FALSE	FALSE
NM_027901	42	54	71752	Gtf3c2	2.22192	2.32526	FALSE	FALSE
NM_016686	118	424	22344	Vezf1	2.67055	3.22023	FALSE	FALSE
NM_001164533	123	167	65111	Dap3	2.68857	2.81558	FALSE	FALSE
NM_146150	87	124	230598	Nrd1	2.53819	2.68629	FALSE	FALSE
NM_001130169	784	1260	22680	Zfp207	3.49298	3.69324	FALSE	FALSE
NM_201406	258	344	276846	Pigs	3.01029	3.12942	FALSE	FALSE
NM_025280	58	94	16588	Kin	2.36209	2.56599	FALSE	FALSE
NM_025679	107	72	66641	Sike1	2.62805	2.4502	FALSE	FALSE
NM_021334	256	367	16411	Itgax	3.00691	3.15753	FALSE	FALSE
NM_172939	121	529	268301	Sowahc	2.68145	3.31632	FALSE	FALSE
NM_178890	20	63	99382	Abtb2	1.8997	2.39221	FALSE	FALSE
NM_021525	95	336	59028	Rcl1	2.57639	3.1192	FALSE	FALSE
NM_011823	8	14	23890	Gpr34	1.50176	1.73899	FALSE	FALSE
NM_020034	1242	1102	56702	Hist1h1b	3.69279	3.63505	FALSE	FALSE
NM_009831	274	311	12450	Ccng1	3.03642	3.08563	FALSE	FALSE
NM_028232	15	20	72415	Sgol1	1.77476	1.89389	FALSE	FALSE
NM_025864	237	356	66950	Tmem206	2.97341	3.14431	FALSE	FALSE
NM_007929	230	162	13731	Emp2	2.96039	2.80238	FALSE	FALSE
NM_026582	182	324	68151	Wls	2.85874	3.10341	FALSE	FALSE
NM_177583	58	101	208117	Aph1b	2.36209	2.59719	FALSE	FALSE
NM_010806	9	22	17356	Mllt4	1.55291	1.93529	FALSE	FALSE
NM_199301	33	27	212508	Mtg1	2.11718	2.02423	FALSE	FALSE
NM_013771	487	651	27377	Yme1l1	3.28619	3.40645	FALSE	FALSE
NM_001013824	36	59	435337	Gm5662	2.15497	2.36372	FALSE	FALSE
NM_010547	107	109	16151	Ikbkg	2.62805	2.63029	FALSE	FALSE
NM_172845	6	19	240913	Adamts4	1.37682	1.87162	FALSE	FALSE
NM_153178	54	121	239528	Ago2	2.33106	2.67565	FALSE	FALSE
NM_001033156	78	183	70611	Fbxo33	2.49076	2.85532	FALSE	FALSE
NM_146239	93	361	237459	Cdk17	2.56715	3.15037	FALSE	FALSE
NM_145599	21	25	234463	Tmem184c	1.92089	1.9908	FALSE	FALSE
NM_027000	411	657	69237	Gtpbp4	3.21251	3.41043	FALSE	FALSE
NM_080638	648	696	78388	Mvp	3.41024	3.43547	FALSE	FALSE
NM_007712	23	49	12748	Clk2	1.96039	2.28306	FALSE	FALSE
NM_001033606	39	64	74205	Acsl3	2.18973	2.39904	FALSE	FALSE
NM_001039723	55	115	330189	Tmem120b	2.33903	2.65356	FALSE	FALSE
NM_025389	139	173	66156	Anapc11	2.74168	2.83091	FALSE	FALSE
NM_178775	24	32	320119	Rps6kc1	1.97888	2.09801	FALSE	FALSE
NM_013872	13	11	29858	Pmm1	1.71261	1.63426	FALSE	FALSE
NM_001177480_dup1	25	22	NA	NA	1.99661	1.93529	FALSE	FALSE
NM_001142920	31	51	21416	Tcf7l2	2.09003	2.30044	FALSE	FALSE
NM_013515	931	1424	13830	Stom	3.56762	3.74637	FALSE	FALSE
NM_172416	138	233	14628	Ostm1	2.73854	2.96022	FALSE	FALSE
NM_001161413	1581	1976	17254	Slc3a2	3.7976	3.88865	FALSE	FALSE
NM_001163532	27	25	72392	Tmem175	2.03003	1.9908	FALSE	FALSE
NM_015827	499	657	50797	Copb2	3.29677	3.41043	FALSE	FALSE
NM_001159551	625	834	14950	H13	3.39455	3.51403	FALSE	FALSE
NM_025811	37	54	66866	Nhlrc2	2.16687	2.32526	FALSE	FALSE
NM_001040187	171	202	67040	Ddx17	2.83166	2.89822	FALSE	FALSE
NM_001077695	16	26	17978	Ncoa2	1.80279	2.00784	FALSE	FALSE
NM_026674	74	158	68318	Aph1c	2.4679	2.79152	FALSE	FALSE
NM_029572	560	780	76299	Erp44	3.34685	3.48496	FALSE	FALSE
NM_026124	237	316	67388	1110008F13Rik	2.97341	3.09255	FALSE	FALSE
NM_145502	128	233	226144	Erlin1	2.70588	2.96022	FALSE	FALSE
NM_001252524	1748	5728	233489	Picalm	3.84121	4.35087	FALSE	FALSE
NM_001195083	91	189	54383	Phc2	2.55771	2.86933	FALSE	FALSE
NM_026393	39	26	67824	Nmral1	2.18973	2.00784	FALSE	FALSE
NM_175116	96	84	67168	Lpar6	2.58094	2.51714	FALSE	FALSE
NM_008959	86	171	19210	Ptdss1	2.53316	2.82586	FALSE	FALSE
NM_001243041	177	114	11534	Adk	2.84664	2.64977	FALSE	FALSE
NM_025442	205	326	66248	Alg5	2.91042	3.10608	FALSE	FALSE
NM_001252490	17	26	64291	Osbpl1a	1.82911	2.00784	FALSE	FALSE
NM_026601	6	15	68180	Hyi	1.37682	1.76896	FALSE	FALSE
NM_001252201	135	485	26921	Map4k4	2.729	3.27861	FALSE	FALSE
NM_026519	239	268	68032	Emc4	2.97706	3.021	FALSE	FALSE
NM_011957	2	14	26427	Creb3l1	1	1.73899	FALSE	FALSE
NM_019694	88	101	56384	Letm1	2.54315	2.59719	FALSE	FALSE
NM_023343	21	56	67444	Ilkap	1.92089	2.34105	FALSE	FALSE
NM_008722	2389	2964	18148	Npm1	3.97688	4.06474	FALSE	FALSE
NM_001205339	263	215	107272	Psat1	3.01862	2.9253	FALSE	FALSE
NM_001112705	41	124	24086	Tlk2	2.21145	2.68629	FALSE	FALSE
NM_023813	408	862	108058	Camk2d	3.20933	3.52837	FALSE	FALSE
NM_028221	113	150	102122	Fam192a	2.65174	2.76896	FALSE	FALSE
NM_001163554	173	107	18987	Pou2f2	2.83671	2.62225	FALSE	FALSE
NM_177323	16	16	72772	Rint1	1.80279	1.79698	FALSE	FALSE
NM_025873	30	57	66966	Trit1	2.07579	2.34874	FALSE	FALSE
NM_020588	21	31	57439	Tmem183a	1.92089	2.08423	FALSE	FALSE
NM_026591	247	260	67707	Mrpl24	2.99136	3.00784	FALSE	FALSE
NM_177688	3314	4796	232440	H2afj	4.11902	4.27374	FALSE	FALSE
NM_153167	23	69	242418	Dcaf10	1.96039	2.43171	FALSE	FALSE
NM_001033145	25	86	68861	1190002N15Rik	1.99661	2.52736	FALSE	FALSE
NM_172579	16	7	217692	Sipa1l1	1.80279	1.43796	FALSE	FALSE
NM_172261	31	60	217124	Ppp1r9b	2.09003	2.37102	FALSE	FALSE
NM_026186	53	117	67480	Cwc25	2.32294	2.66105	FALSE	FALSE
NM_145564	42	19	231670	Fbxo21	2.22192	1.87162	FALSE	FALSE
NM_001198787	16	16	11302	Aatk	1.80279	1.79698	FALSE	FALSE
NM_001109657	511	446	14457	Gas7	3.30709	3.2422	FALSE	FALSE
NM_026876	100	140	98685	Trmt1l	2.59867	2.73899	FALSE	FALSE
NM_019940	20	49	56707	Zfp111	1.8997	2.28306	FALSE	FALSE
NM_001160043	14	4	73172	Exo5	1.74479	1.19492	FALSE	FALSE
NM_001195025	72	189	74137	Nuak2	2.456	2.86933	FALSE	FALSE
NM_025374	197	156	109801	Glo1	2.89313	2.78599	FALSE	FALSE
NM_178700	74	190	231413	Grsf1	2.4679	2.87162	FALSE	FALSE
NM_001165985	393	598	74383	Ubap2l	3.19306	3.36957	FALSE	FALSE
NM_010738	14	7	110454	Ly6a	1.74479	1.43796	FALSE	FALSE
NM_013861	22	31	29807	Tpk1	1.94109	2.08423	FALSE	FALSE
NM_001166669	42	39	216766	Gemin5	2.22192	2.18393	FALSE	FALSE
NM_025424	68	118	66208	Nenf	2.43117	2.66475	FALSE	FALSE
NM_001037941	269	724	23950	Dnajb6	3.02842	3.4526	FALSE	FALSE
NM_013560	5	14	15507	Hspb1	1.29764	1.73899	FALSE	FALSE
NM_172405	25	21	70681	Fam175a	1.99661	1.91508	FALSE	FALSE
NM_018781	7	15	13655	Egr3	1.44376	1.76896	FALSE	FALSE
NM_001130459	377	527	21452	Tcn2	3.17501	3.31468	FALSE	FALSE
NM_009156	3	23	20364	Sepw1	1.07579	1.95459	FALSE	FALSE
NM_009606	13642	8842	11459	Acta1	4.73354	4.53942	FALSE	FALSE
NM_019636	63	168	57915	Tbc1d1	2.39801	2.81817	FALSE	FALSE
NM_029561	131	287	76273	Ndfip2	2.71594	3.05075	FALSE	FALSE
NM_173442	87	125	14537	Gcnt1	2.53819	2.68977	FALSE	FALSE
NM_145511	134	136	226499	BC003331	2.72577	2.7264	FALSE	FALSE
NM_025590	37	26	329910	Acot11	2.16687	2.00784	FALSE	FALSE
NM_029279	31	75	75420	Secisbp2	2.09003	2.46793	FALSE	FALSE
NM_025301	214	128	27397	Mrpl17	2.92908	2.70007	FALSE	FALSE
NM_007482	404	309	11846	Arg1	3.20505	3.08282	FALSE	FALSE
NM_025969	18	9	67105	Timm21	1.85394	1.54711	FALSE	FALSE
NM_011885	39	38	24030	Mrps12	2.18973	2.17265	FALSE	FALSE
NM_009853	8642	10774	12514	Cd68	4.53528	4.62524	FALSE	FALSE
NM_011232	21	19	19355	Rad1	1.92089	1.87162	FALSE	FALSE
NM_134142	442	361	68539	Tmem109	3.24409	3.15037	FALSE	FALSE
NM_020625	7	14	81630	Zbtb22	1.44376	1.73899	FALSE	FALSE
NM_145942	89	208	208715	Hmgcs1	2.54806	2.91093	FALSE	FALSE
NM_011962	320	427	26433	Plod3	3.10382	3.22329	FALSE	FALSE
NM_019683	44	34	56503	Ankrd49	2.24212	2.12434	FALSE	FALSE
NM_008810	235	183	18597	Pdha1	2.96973	2.85532	FALSE	FALSE
NM_001037848	32	35	72068	Cnot2	2.10382	2.13693	FALSE	FALSE
NM_008249	28	30	15278	Tfb2m	2.04582	2.06999	FALSE	FALSE
NM_028904	59	129	74386	Rmi1	2.36952	2.70345	FALSE	FALSE
NM_001160379	92	154	212943	Fam46a	2.56245	2.78039	FALSE	FALSE
NM_010121	12	34	13666	Eif2ak3	1.67785	2.12434	FALSE	FALSE
NM_001163468	7	26	18685	Phtf1	1.44376	2.00784	FALSE	FALSE
NM_001167886	21	45	225888	Suv420h1	1.92089	2.24608	FALSE	FALSE
NM_001025577	312	291	17132	Maf	3.09282	3.05676	FALSE	FALSE
NM_198001	27	33	73737	1110008P14Rik	2.03003	2.11138	FALSE	FALSE
NM_152803	87	207	15442	Hpse	2.53819	2.90884	FALSE	FALSE
NM_021550	168	226	59048	C1galt1c1	2.82398	2.94697	FALSE	FALSE
NM_011647	28	46	22084	Tsc2	2.04582	2.25562	FALSE	FALSE
NM_013814	62	157	14423	Galnt1	2.39106	2.78876	FALSE	FALSE
NM_001005867	25	33	52915	Zmiz2	1.99661	2.11138	FALSE	FALSE
NM_175512	92	148	241452	Dhrs9	2.56245	2.76313	FALSE	FALSE
NM_001163705	66	59	50762	Fbxo6	2.41821	2.36372	FALSE	FALSE
NM_016897	227	489	53600	Timm23	2.95469	3.28217	FALSE	FALSE
NM_175242	307	1040	76448	Ppp1r18	3.0858	3.6099	FALSE	FALSE
NM_001081320	23	13	72023	Cyb561d1	1.96039	1.70681	FALSE	FALSE
NM_009938	516	587	12847	Copa	3.31132	3.3615	FALSE	FALSE
NM_153794	67	79	108654	Fam210a	2.42474	2.49049	FALSE	FALSE
NM_001177406_dup3	57	53	NA	NA	2.35454	2.31714	FALSE	FALSE
NM_001199177	74	121	74143	Opa1	2.4679	2.67565	FALSE	FALSE
NM_001005508	122	99	226652	Arhgap30	2.68503	2.5885	FALSE	FALSE
NM_027457	74	62	70544	Tmem242	2.4679	2.38526	FALSE	FALSE
NM_001177753	1058	4112	170768	Pfkfb3	3.62315	4.20692	FALSE	FALSE
NM_013678	29	25	20931	Surf2	2.06106	1.9908	FALSE	FALSE
NM_001113470	49	129	52468	Ctdsp2	2.28886	2.70345	FALSE	FALSE
NM_133781	312	666	12283	Cab39	3.09282	3.41634	FALSE	FALSE
NM_009798	1960	2916	12345	Capzb	3.89092	4.05765	FALSE	FALSE
NM_177262	86	108	320795	Pkn1	2.53316	2.62629	FALSE	FALSE
NM_025635	361	582	52696	Zwint	3.15617	3.35779	FALSE	FALSE
NM_053168	26	26	94091	Trim11	2.01364	2.00784	FALSE	FALSE
NM_001033299	47	122	228913	Zfp217	2.27076	2.67922	FALSE	FALSE
NM_001013792	102	161	432940	Otulin	2.60727	2.79969	FALSE	FALSE
NM_001253758	87	122	66471	Anp32e	2.53819	2.67922	FALSE	FALSE
NM_001127338	89	48	110695	Aldh7a1	2.54806	2.27411	FALSE	FALSE
NM_001199043	434	327	56048	Lgals8	3.23616	3.10741	FALSE	FALSE
NM_207530	16	51	64291	Osbpl1a	1.80279	2.30044	FALSE	FALSE
NM_133907	41	60	100763	Ube3c	2.21145	2.37102	FALSE	FALSE
NM_022964	213	207	56743	Lat2	2.92705	2.90884	FALSE	FALSE
NM_009404	690	2890	21950	Tnfsf9	3.43751	4.05376	FALSE	FALSE
NM_027088	22	40	104416	Bap1	1.94109	2.19492	FALSE	FALSE
NM_001081247	44	82	218832	Polr3a	2.24212	2.50668	FALSE	FALSE
NM_026959	89	118	71116	Stx18	2.54806	2.66475	FALSE	FALSE
NM_001159418	320	409	16391	Irf9	3.10382	3.20459	FALSE	FALSE
NM_001042655	43	46	233204	Tbc1d17	2.23213	2.25562	FALSE	FALSE
NM_194342	180	338	223697	Sun2	2.85394	3.12178	FALSE	FALSE
NM_001007465	102	411	67338	Rffl	2.60727	3.20671	FALSE	FALSE
NM_001199307_dup1	26	24	NA	NA	2.01364	1.97308	FALSE	FALSE
NM_001036740	19	24	232984	B3gnt8	1.87742	1.97308	FALSE	FALSE
NM_021437	60	58	58248	1700123O20Rik	2.37682	2.35629	FALSE	FALSE
NM_001033202	31	43	100756	Usp30	2.09003	2.22633	FALSE	FALSE
NM_028005	35	90	71923	2310047M10Rik	2.14273	2.54711	FALSE	FALSE
NM_009471	66	77	22247	Umps	2.41821	2.47936	FALSE	FALSE
NM_133688	17	17	67636	Lyrm5	1.82911	1.82331	FALSE	FALSE
NM_029789	824	1664	76893	Cers2	3.51459	3.81402	FALSE	FALSE
NM_172742	29	59	233315	Mtmr10	2.06106	2.36372	FALSE	FALSE
NM_001162416	21	14	18640	Pfkfb2	1.92089	1.73899	FALSE	FALSE
NM_146011	42	50	216445	Arhgap9	2.22192	2.29183	FALSE	FALSE
NM_176849	87	149	234023	Arglu1	2.53819	2.76605	FALSE	FALSE
NM_027181	125	99	69713	Pin4	2.69558	2.5885	FALSE	FALSE
NM_029929	149	119	77573	Vps33a	2.77185	2.66841	FALSE	FALSE
NM_026810	37	22	17350	Mlh1	2.16687	1.93529	FALSE	FALSE
NM_028184	41	42	72284	Oraov1	2.21145	2.21611	FALSE	FALSE
NM_008915	20	90	19057	Ppp3cc	1.8997	2.54711	FALSE	FALSE
NM_025936	481	412	104458	Rars	3.28081	3.20776	FALSE	FALSE
NM_023233	72	192	66597	Trim13	2.456	2.87617	FALSE	FALSE
NM_175093	13	12	228775	Trib3	1.71261	1.67205	FALSE	FALSE
NM_134133	118	254	106878	Smim3	2.67055	2.9977	FALSE	FALSE
NM_198122	60	203	94246	Arid4b	2.37682	2.90036	FALSE	FALSE
NM_145933	11	32	20440	St6gal1	1.64006	2.09801	FALSE	FALSE
NM_019650	359	1004	56494	Gosr2	3.15376	3.5946	FALSE	FALSE
NM_001166409	1513	1524	19652	Rbm3	3.7785	3.77585	FALSE	FALSE
NM_028412	24	26	68379	Ciz1	1.97888	2.00784	FALSE	FALSE
NM_001163389	17	8	74479	Snx11	1.82911	1.49595	FALSE	FALSE
NM_016721	1448	2769	29875	Iqgap1	3.75943	4.03519	FALSE	FALSE
NM_029293	61	59	75454	Phpt1	2.384	2.36372	FALSE	FALSE
NM_001163684	118	75	66394	Nosip	2.67055	2.46793	FALSE	FALSE
NM_025983	344	432	67126	Atp5e	3.13522	3.22835	FALSE	FALSE
NM_001081654	161	272	21767	Tex264	2.80549	3.02743	FALSE	FALSE
NM_011614	45	81	21944	Tnfsf12	2.25188	2.50135	FALSE	FALSE
NM_027350	492	589	70223	Nars	3.29063	3.36298	FALSE	FALSE
NM_080708	209	896	140780	Bmp2k	2.91881	3.54517	FALSE	FALSE
NM_001164568	40	29	20469	Sipa1	2.20073	2.05526	FALSE	FALSE
NM_001199270	1161	874	353204	Aldoart1	3.6635	3.53438	FALSE	FALSE
NM_146169	22	37	232164	Paip2b	1.94109	2.16107	FALSE	FALSE
NM_180956	65	38	29812	Ndrg3	2.41158	2.17265	FALSE	FALSE
NM_172382	115	196	230674	Kdm4a	2.65936	2.88512	FALSE	FALSE
NM_001177543_dup3	58	47	NA	NA	2.36209	2.26496	FALSE	FALSE
NM_007622	80	80	12412	Cbx1	2.50176	2.49595	FALSE	FALSE
NM_145494	60	140	107029	Me2	2.37682	2.73899	FALSE	FALSE
NM_018745	180	706	54375	Azin1	2.85394	3.44167	FALSE	FALSE
NM_007965	645	381	14026	Evl	3.40823	3.17379	FALSE	FALSE
NM_010503	2	14	15965	Ifna2	1	1.73899	FALSE	FALSE
NM_153134	20	73	210146	Irgq	1.8997	2.45619	FALSE	FALSE
NM_144888	126	53	228607	Mavs	2.69904	2.31714	FALSE	FALSE
NM_001002008	22	34	381066	Zfp948	1.94109	2.12434	FALSE	FALSE
NM_032396	60	90	84035	Kremen1	2.37682	2.54711	FALSE	FALSE
NM_001110831	131	113	13437	Dnpep	2.71594	2.64594	FALSE	FALSE
NM_001037747	71	53	332579	Card9	2.44992	2.31714	FALSE	FALSE
NM_029482	14	8	75939	4930579G24Rik	1.74479	1.49595	FALSE	FALSE
NM_025495	24	29	66336	Cenpp	1.97888	2.05526	FALSE	FALSE
NM_001146348	162	171	13805	Eng	2.80818	2.82586	FALSE	FALSE
NM_175026	510	567	236312	Pyhin1	3.30624	3.34645	FALSE	FALSE
NM_173363	222	267	217869	Eif5	2.94502	3.01938	FALSE	FALSE
NM_011427	6	46	20613	Snai1	1.37682	2.25562	FALSE	FALSE
NM_153141	57	90	59035	Carm1	2.35454	2.54711	FALSE	FALSE
NM_172593	25	119	218613	Mier3	1.99661	2.66841	FALSE	FALSE
NM_001164421	113	384	66943	Pqlc1	2.65174	3.1772	FALSE	FALSE
NM_001099349_dup6	68	54	NA	NA	2.43117	2.32526	FALSE	FALSE
NM_026447	11	15	67905	Ppm1m	1.64006	1.76896	FALSE	FALSE
NM_011184	848	944	19167	Psma3	3.52706	3.56784	FALSE	FALSE
NM_013652	5128	6221	20303	Ccl4	4.30861	4.38673	FALSE	FALSE
NM_001142919	33	50	21416	Tcf7l2	2.11718	2.29183	FALSE	FALSE
NM_001195487	448	955	225027	Srsf7	3.24994	3.57287	FALSE	FALSE
NM_172117	19	23	12497	Entpd6	1.87742	1.95459	FALSE	FALSE
NM_023040	61	45	11692	Gfer	2.384	2.24608	FALSE	FALSE
NM_026753	118	111	68523	Fam96b	2.67055	2.63819	FALSE	FALSE
NM_001033273	117	131	223739	5031439G07Rik	2.66685	2.71014	FALSE	FALSE
NM_011070	187	204	18637	Pfdn2	2.87051	2.9025	FALSE	FALSE
NM_009066	28	29	19763	Ring1	2.04582	2.05526	FALSE	FALSE
NM_019816	51	66	56321	Aatf	2.30624	2.41241	FALSE	FALSE
NM_001110350	60	102	20466	Sin3a	2.37682	2.60147	FALSE	FALSE
NM_133921	35	101	100978	Nfxl1	2.14273	2.59719	FALSE	FALSE
NM_018877	47	60	84505	Setdb1	2.27076	2.37102	FALSE	FALSE
NM_029086	30	19	74753	5830415F09Rik	2.07579	1.87162	FALSE	FALSE
NM_001113391	3	26	12503	Cd247	1.07579	2.00784	FALSE	FALSE
NM_172733	187	180	232449	Dera	2.87051	2.84814	FALSE	FALSE
NM_138667	111	320	68652	Tab2	2.64399	3.09801	FALSE	FALSE
NM_029617	26	36	76464	Casc5	2.01364	2.14917	FALSE	FALSE
NM_029976	58	97	52626	Cdkn2aipnl	2.36209	2.57964	FALSE	FALSE
NM_175563	126	156	270906	Prr11	2.69904	2.78599	FALSE	FALSE
NM_001082552	100	183	20821	Trim21	2.59867	2.85532	FALSE	FALSE
NM_025507	304	420	66354	Snw1	3.08154	3.21611	FALSE	FALSE
NM_012048	25	29	27015	Polk	1.99661	2.05526	FALSE	FALSE
NM_001253354	16	19	230088	Fam214b	1.80279	1.87162	FALSE	FALSE
NM_029763	37	71	70408	Polr3f	2.16687	2.44412	FALSE	FALSE
NM_001199124	102	133	66442	Spc25	2.60727	2.71672	FALSE	FALSE
NM_001044705	24	59	22697	Zscan21	1.97888	2.36372	FALSE	FALSE
NM_027404	48	111	70369	Bag5	2.27991	2.63819	FALSE	FALSE
NM_001253804	124	280	20498	Slc12a4	2.69209	3.04002	FALSE	FALSE
NM_001110228	297	460	14007	Celf2	3.07142	3.25562	FALSE	FALSE
NM_009211	92	143	20588	Smarcc1	2.56245	2.7482	FALSE	FALSE
NM_026032	20	48	67207	Lsm1	1.8997	2.27411	FALSE	FALSE
NM_009729	3380	2859	11984	Atp6v0c	4.12758	4.04908	FALSE	FALSE
NM_001146010	98	398	207278	Fchsd2	2.58989	3.19275	FALSE	FALSE
NM_009912	982	832	12768	Ccr1	3.59078	3.51299	FALSE	FALSE
NM_133954	89	100	101985	Usb1	2.54806	2.59286	FALSE	FALSE
NM_031999	137	220	83924	Gpr137b	2.73539	2.93529	FALSE	FALSE
NM_198607	12	11	223626	Them6	1.67785	1.63426	FALSE	FALSE
NM_001102414	2	15	117591	Slc2a9	1	1.76896	FALSE	FALSE
NM_001081214	46	57	226169	Pprc1	2.26142	2.34874	FALSE	FALSE
NM_001161457	116	142	12400	Cbfb	2.66312	2.74515	FALSE	FALSE
NM_027130	94	151	69597	Afg3l2	2.57179	2.77184	FALSE	FALSE
NM_021473	2509	1953	58810	Akr1a1	3.99817	3.88357	FALSE	FALSE
NM_026638	184	226	52858	Cdipt	2.86348	2.94697	FALSE	FALSE
NM_001100416	70	54	668030	Gm14432	2.44376	2.32526	FALSE	FALSE
NM_178645	365	310	104184	Blmh	3.16096	3.08423	FALSE	FALSE
NM_009075	28	19	19895	Rpia	2.04582	1.87162	FALSE	FALSE
NM_019805	159	289	56317	Anapc7	2.80006	3.05376	FALSE	FALSE
NM_176979	24	38	235559	Topbp1	1.97888	2.17265	FALSE	FALSE
NM_026168	113	143	67456	Ergic2	2.65174	2.7482	FALSE	FALSE
NM_001252568	56	52	227696	Phyhd1	2.34685	2.30887	FALSE	FALSE
NM_178115	17	26	214764	Edrf1	1.82911	2.00784	FALSE	FALSE
NM_001159421	74	51	381045	Ccdc58	2.4679	2.30044	FALSE	FALSE
NM_001256480_dup1	68	58	NA	NA	2.43117	2.35629	FALSE	FALSE
NM_177411	332	541	19344	Rab5b	3.1198	3.32606	FALSE	FALSE
NM_026898	31	24	68980	Wdr53	2.09003	1.97308	FALSE	FALSE
NM_001199186	50	103	68682	Slc44a2	2.29764	2.6057	FALSE	FALSE
NM_172618	70	123	224671	Btbd9	2.44376	2.68277	FALSE	FALSE
NM_009273	280	337	20813	Srp14	3.04582	3.12049	FALSE	FALSE
NM_001167921	116	113	68153	Gtf2e2	2.66312	2.64594	FALSE	FALSE
NM_026054	356	1266	67246	2810474O19Rik	3.15012	3.6953	FALSE	FALSE
NM_008689	781	2941	18033	Nfkb1	3.49132	4.06136	FALSE	FALSE
NM_029965	15	12	77733	Rnf170	1.77476	1.67205	FALSE	FALSE
NM_001252454	31	46	13854	Epn1	2.09003	2.25562	FALSE	FALSE
NM_007547	2273	4629	19261	Sirpa	3.95527	4.25835	FALSE	FALSE
NM_001177403	29	23	68554	Cebpzos	2.06106	1.95459	FALSE	FALSE
NM_001166597	32	33	104418	Dgkz	2.10382	2.11138	FALSE	FALSE
NM_139141	19	6	93681	Zkscan8	1.87742	1.37102	FALSE	FALSE
NM_175318	118	412	101685	Spty2d1	2.67055	3.20776	FALSE	FALSE
NM_009974	208	496	13000	Csnk2a2	2.91673	3.28835	FALSE	FALSE
NM_012057	569	1348	27056	Irf5	3.35378	3.72255	FALSE	FALSE
NM_001167745	11	37	73178	Wasl	1.64006	2.16107	FALSE	FALSE
NM_134007	63	82	52637	Cisd1	2.39801	2.50668	FALSE	FALSE
NM_178854	48	101	231464	Cnot6l	2.27991	2.59719	FALSE	FALSE
NM_030251	22	8	80283	Abtb1	1.94109	1.49595	FALSE	FALSE
NM_001253813	167	243	105722	Ano6	2.82138	2.97847	FALSE	FALSE
NM_013634	53	99	19014	Med1	2.32294	2.5885	FALSE	FALSE
NM_026021	18	39	67187	Zmynd19	1.85394	2.18393	FALSE	FALSE
NM_001113346	115	190	234366	Gatad2a	2.65936	2.87162	FALSE	FALSE
NM_008612	105	222	17420	Mnat1	2.61986	2.93922	FALSE	FALSE
NM_177378	18	36	330812	Rnf150	1.85394	2.14917	FALSE	FALSE
NM_025828	415	805	66890	Lman2	3.21671	3.49866	FALSE	FALSE
NM_008142	891	2089	14688	Gnb1	3.54854	3.9128	FALSE	FALSE
NM_175934	95	172	52040	Ppp1r10	2.57639	2.82839	FALSE	FALSE
NM_053124	152	298	93762	Smarca5	2.78051	3.06708	FALSE	FALSE
NM_001253714	114	159	110265	Msra	2.65557	2.79426	FALSE	FALSE
NM_001171052	84	133	116871	Mta3	2.52295	2.71672	FALSE	FALSE
NM_133943	132	104	101502	Hsd3b7	2.71924	2.6099	FALSE	FALSE
NM_030682	156	219	21897	Tlr1	2.79179	2.93331	FALSE	FALSE
NM_001097979_dup1	11794	18362	NA	NA	4.67033	4.85678	FALSE	FALSE
NM_001081203	91	235	243272	Sbno1	2.55771	2.96393	FALSE	FALSE
NM_026915	8	11	69032	Lyzl4	1.50176	1.63426	FALSE	FALSE
NM_009369	8264	7697	21810	Tgfbi	4.51586	4.47919	FALSE	FALSE
NM_019979	304	433	80795	Selk	3.08154	3.22935	FALSE	FALSE
NM_001160018	265	286	208263	Tor1aip1	3.02191	3.04923	FALSE	FALSE
NM_177464	66	151	52013	R3hcc1l	2.41821	2.77184	FALSE	FALSE
NM_001029977	48	115	214403	Gm4788	2.27991	2.65356	FALSE	FALSE
NM_026472	281	282	67949	Nifk	3.04737	3.04311	FALSE	FALSE
NM_011193	181	174	19200	Pstpip1	2.85634	2.83341	FALSE	FALSE
NM_001042527	14	22	12144	Blm	1.74479	1.93529	FALSE	FALSE
NM_053090	66	105	84652	Fam126a	2.41821	2.61405	FALSE	FALSE
NM_144516	55	105	66505	Zmynd11	2.33903	2.61405	FALSE	FALSE
NM_178371	117	262	77031	Slc9a8	2.66685	3.01117	FALSE	FALSE
NM_001077189	3249	4233	14130	Fcgr2b	4.11042	4.21951	FALSE	FALSE
NM_001170341	234	240	30853	Mlf2	2.96788	2.97308	FALSE	FALSE
NM_013559	140	145	15505	Hsph1	2.74479	2.75423	FALSE	FALSE
NM_011386	626	1668	20482	Skil	3.39524	3.81506	FALSE	FALSE
NM_001177674	12	2	238377	Gpr68	1.67785	1	FALSE	FALSE
NM_001039200	225	301	230866	Emc1	2.95085	3.07143	FALSE	FALSE
NM_001081382	10	32	72306	Zfp777	1.59867	2.09801	FALSE	FALSE
NM_025716	28	11	66701	Spryd4	2.04582	1.63426	FALSE	FALSE
NM_001017983	9	21	239554	Foxred2	1.55291	1.91508	FALSE	FALSE
NM_010240	1791	3274	14325	Ftl1	3.85176	4.10794	FALSE	FALSE
NM_027264	63	189	69930	Zfp715	2.39801	2.86933	FALSE	FALSE
NM_178599	93	168	27784	Commd8	2.56715	2.81817	FALSE	FALSE
NM_030035	22	31	224139	Golgb1	1.94109	2.08423	FALSE	FALSE
NM_001081108	148	129	66096	Lamtor4	2.76893	2.70345	FALSE	FALSE
NM_011333	20088	31721	20296	Ccl2	4.9016	5.09421	FALSE	FALSE
NM_019711	17	23	56516	Rbms2	1.82911	1.95459	FALSE	FALSE
NM_001177601	31	30	104457	0610010K14Rik	2.09003	2.06999	FALSE	FALSE
NM_001033765	12	13	237880	1700071K01Rik	1.67785	1.70681	FALSE	FALSE
NM_001205025	110	131	67767	Jagn1	2.64006	2.71014	FALSE	FALSE
NM_028140	34	42	72175	Mfsd8	2.13014	2.21611	FALSE	FALSE
NM_001111021	154	351	12394	Runx1	2.78619	3.13817	FALSE	FALSE
NM_008326	680	973	15944	Irgm1	3.43117	3.58098	FALSE	FALSE
NM_001048143	21	13	270096	Mon1b	1.92089	1.70681	FALSE	FALSE
NM_001079824	64	101	432467	Hnrnph3	2.40485	2.59719	FALSE	FALSE
NM_153398	27	72	268294	Zbtb24	2.03003	2.4502	FALSE	FALSE
NM_198416	9	16	108946	Zzz3	1.55291	1.79698	FALSE	FALSE
NM_183225	27	49	329908	Usp24	2.03003	2.28306	FALSE	FALSE
NM_001037170	17	14	641376	Tomm40l	1.82911	1.73899	FALSE	FALSE
NM_001033336	68	257	239273	Abcc4	2.43117	3.0028	FALSE	FALSE
NM_001168656	10	45	216233	Socs2	1.59867	2.24608	FALSE	FALSE
NM_001161853	320	262	20587	Smarcb1	3.10382	3.01117	FALSE	FALSE
NM_175655	8276	14139	319157	Hist1h4f	4.51649	4.74328	FALSE	FALSE
NM_001163495	34	18	71085	Arhgap19	2.13014	1.84814	FALSE	FALSE
NM_001164274	29	34	29808	Mga	2.06106	2.12434	FALSE	FALSE
NM_027912	26	14	71767	Tysnd1	2.01364	1.73899	FALSE	FALSE
NM_001110130	85	70	66101	Ppih	2.52808	2.43796	FALSE	FALSE
NM_001081319	17	66	226089	Ric1	1.82911	2.41241	FALSE	FALSE
NM_011791	113	126	23808	Ash2l	2.65174	2.69324	FALSE	FALSE
NM_001177708	128	146	228998	Arfgap1	2.70588	2.75722	FALSE	FALSE
NM_020575	175	404	57438	2016-03-07	2.8417	3.19925	FALSE	FALSE
NM_001039194	100	131	71361	Aifm2	2.59867	2.71014	FALSE	FALSE
NM_001033383	24	34	319748	Zfp865	1.97888	2.12434	FALSE	FALSE
NM_001159605	91	168	80912	Pum1	2.55771	2.81817	FALSE	FALSE
NM_001253390	22	20	67472	Mtfr1	1.94109	1.89389	FALSE	FALSE
NM_001255994	12	10	140629	Ubox5	1.67785	1.59286	FALSE	FALSE
NM_001168371	80	193	71472	Usp19	2.50176	2.87842	FALSE	FALSE
NM_001141965	222	364	67877	Naa20	2.94502	3.15397	FALSE	FALSE
NM_134054	126	202	104725	Sptssa	2.69904	2.89822	FALSE	FALSE
NM_001165941	20	32	74455	Nsun6	1.8997	2.09801	FALSE	FALSE
NM_198027	41	63	233065	Alkbh6	2.21145	2.39221	FALSE	FALSE
NM_021536	46	112	59040	Rhot1	2.26142	2.64208	FALSE	FALSE
NM_013685	98	138	21413	Tcf4	2.58989	2.73274	FALSE	FALSE
NM_001199249	98	159	81601	Kat5	2.58989	2.79426	FALSE	FALSE
NM_019575	98	97	56214	Scamp4	2.58989	2.57964	FALSE	FALSE
NM_001128094	53	251	224088	Atp13a3	2.32294	2.99254	FALSE	FALSE
NM_001042408	88	106	27366	Txnl4a	2.54315	2.61817	FALSE	FALSE
NM_028207	213	185	72349	Dusp3	2.92705	2.86004	FALSE	FALSE
NM_001168537	9	13	71891	Cdadc1	1.55291	1.70681	FALSE	FALSE
NM_007561	24	43	12168	Bmpr2	1.97888	2.22633	FALSE	FALSE
NM_148934	53	24	110012	Tpgs1	2.32294	1.97308	FALSE	FALSE
NM_022432	195	179	64383	Sirt2	2.8887	2.84572	FALSE	FALSE
NM_025899	538	466	67003	Uqcrc2	3.32945	3.26125	FALSE	FALSE
NM_008133	637	721	14661	Glud1	3.40281	3.4508	FALSE	FALSE
NM_009192	259	86	20491	Sla	3.01197	2.52736	FALSE	FALSE
NM_001033457	21	41	433864	Nom1	1.92089	2.20565	FALSE	FALSE
NM_177594	79	124	210376	Mtmr9	2.49629	2.68629	FALSE	FALSE
NM_053195	12	35	94249	Slc24a3	1.67785	2.13693	FALSE	FALSE
NM_013762	3686	5679	27367	Rpl3	4.16522	4.34714	FALSE	FALSE
NM_001034085	122	82	73699	Ppp2r1b	2.68503	2.50668	FALSE	FALSE
NM_172856	1132	2119	241447	Cers6	3.65251	3.919	FALSE	FALSE
NM_133990	80	175	16164	Il13ra1	2.50176	2.8359	FALSE	FALSE
NM_001161798	61	62	17769	Mthfr	2.384	2.38526	FALSE	FALSE
NM_023871	701	884	56086	Set	3.44438	3.53932	FALSE	FALSE
NM_134021	29	46	103711	Pnpo	2.06106	2.25562	FALSE	FALSE
NM_029132	18	10	103268	Cep57l1	1.85394	1.59286	FALSE	FALSE
NM_009336	109	141	21427	Vps72	2.63609	2.74208	FALSE	FALSE
NM_019926	117	166	17772	Mtm1	2.66685	2.81297	FALSE	FALSE
NM_018886	434	327	56048	Lgals8	3.23616	3.10741	FALSE	FALSE
NM_026403	75	73	67842	Nop9	2.47373	2.45619	FALSE	FALSE
NM_011841	14	10	23939	Mapk7	1.74479	1.59286	FALSE	FALSE
NM_178766	14	22	319653	Slc25a40	1.74479	1.93529	FALSE	FALSE
NM_001110211	347	309	11749	Anxa6	3.139	3.08282	FALSE	FALSE
NM_013847	37	53	26912	Gcat	2.16687	2.31714	FALSE	FALSE
NM_028658	145	149	73825	Ppp1r21	2.76003	2.76605	FALSE	FALSE
NM_013506	377	582	13682	Eif4a2	3.17501	3.35779	FALSE	FALSE
NM_145371	160	99	209354	Eif2b1	2.80279	2.5885	FALSE	FALSE
NM_153530	45	41	208718	Dis3l2	2.25188	2.20565	FALSE	FALSE
NM_172153	18	32	209707	Lcorl	1.85394	2.09801	FALSE	FALSE
NM_025802	114	148	66853	Pnpla2	2.65557	2.76313	FALSE	FALSE
NM_007987	321	913	14102	Fas	3.10517	3.55334	FALSE	FALSE
NM_026689	146	343	68350	Mul1	2.76302	3.12816	FALSE	FALSE
NM_001256195	41	52	230861	Eif4g3	2.21145	2.30887	FALSE	FALSE
NM_138757	27	34	71177	Asun	2.03003	2.12434	FALSE	FALSE
NM_145537	71	130	108687	Edem2	2.44992	2.70681	FALSE	FALSE
NM_009383	223	420	21843	Tial1	2.94697	3.21611	FALSE	FALSE
NM_019993	150	135	56752	Aldh9a1	2.77476	2.7232	FALSE	FALSE
NM_023538	70	67	69923	Agk	2.44376	2.41894	FALSE	FALSE
NM_025327	310	275	66059	Krtcap2	3.09003	3.0322	FALSE	FALSE
NM_001168304	16	41	78334	Cdk19	1.80279	2.20565	FALSE	FALSE
NM_001042501	252	1236	68152	Fam133b	3.00007	3.68488	FALSE	FALSE
NM_026829	128	219	107885	Mthfs	2.70588	2.93331	FALSE	FALSE
NM_001243052	174	103	12036	Bcat2	2.83922	2.6057	FALSE	FALSE
NM_010631	1	13	16582	Kifc3	1	1.70681	FALSE	FALSE
NM_023268	108	137	104009	Qsox1	2.63209	2.72959	FALSE	FALSE
NM_008591	13	54	17295	Met	1.71261	2.32526	FALSE	FALSE
NM_021895	456	675	60595	Actn4	3.25763	3.42217	FALSE	FALSE
NM_029653	23	28	69635	Dapk1	1.96039	2.04002	FALSE	FALSE
NM_011218	26	32	19280	Ptprs	2.01364	2.09801	FALSE	FALSE
NM_021792	99	111	60440	Iigp1	2.5943	2.63819	FALSE	FALSE
NM_026612	208	145	68198	Ndufb2	2.91673	2.75423	FALSE	FALSE
NM_001164735	319	512	57914	Crlf2	3.10246	3.30213	FALSE	FALSE
NM_007514	1036	2965	11988	Slc7a2	3.61403	4.06489	FALSE	FALSE
NM_008186	45	80	14884	Gtf2h1	2.25188	2.49595	FALSE	FALSE
NM_145968	91	279	72536	Tagap	2.55771	3.03847	FALSE	FALSE
NM_008876	28	47	18806	Pld2	2.04582	2.26496	FALSE	FALSE
NM_008717	73	135	18139	Zfml	2.46199	2.7232	FALSE	FALSE
NM_016800	95	132	53612	Vti1b	2.57639	2.71344	FALSE	FALSE
NM_001252542	36	27	78797	Ndor1	2.15497	2.02423	FALSE	FALSE
NM_178029	12	35	233904	Setd1a	1.67785	2.13693	FALSE	FALSE
NM_001033181	13	23	77532	Jrkl	1.71261	1.95459	FALSE	FALSE
NM_139206	56	53	106952	Arap3	2.34685	2.31714	FALSE	FALSE
NM_025770	35	40	66795	Atg10	2.14273	2.19492	FALSE	FALSE
NM_027817	289	742	71520	Grap	3.05956	3.46327	FALSE	FALSE
NM_011755	17	31	22694	Zfp35	1.82911	2.08423	FALSE	FALSE
NM_172768	113	187	235283	Gramd1b	2.65174	2.86471	FALSE	FALSE
NM_146037	57	53	217826	Kcnk13	2.35454	2.31714	FALSE	FALSE
NM_001081122	16	21	28135	Cep63	1.80279	1.91508	FALSE	FALSE
NM_133352	519	1867	107358	Tm9sf3	3.31383	3.86401	FALSE	FALSE
NM_009088	83	63	20019	Polr1a	2.51774	2.39221	FALSE	FALSE
NM_013498	43	98	12916	Crem	2.23213	2.58409	FALSE	FALSE
NM_175268	21	20	77938	Fam53b	1.92089	1.89389	FALSE	FALSE
NM_001080749	64	70	14886	Gtf2i	2.40485	2.43796	FALSE	FALSE
NM_024214	415	964	67952	Tomm20	3.21671	3.57694	FALSE	FALSE
NM_001013367	216	222	105787	Prkaa1	2.93312	2.93922	FALSE	FALSE
NM_133886	37	32	100317	AU040320	2.16687	2.09801	FALSE	FALSE
NM_029738	27	27	76779	Cluap1	2.03003	2.02423	FALSE	FALSE
NM_174850	60	101	231830	Micall2	2.37682	2.59719	FALSE	FALSE
NM_029068	45	62	74718	Snx16	2.25188	2.38526	FALSE	FALSE
NM_001103181	15	30	68842	Tulp4	1.77476	2.06999	FALSE	FALSE
NM_016909	136	219	53424	Tsnax	2.7322	2.93331	FALSE	FALSE
NM_029998	37	45	77877	6030458C11Rik	2.16687	2.24608	FALSE	FALSE
NM_201239	288	376	58809	Rnase4	3.05806	3.16805	FALSE	FALSE
NM_028720	337	433	74022	Glyr1	3.1263	3.22935	FALSE	FALSE
NM_024180	120	195	66844	Ormdl2	2.67785	2.8829	FALSE	FALSE
NM_144875	10	18	226422	Rab29	1.59867	1.84814	FALSE	FALSE
NM_001010836	11	12	333654	Ppp1r13l	1.64006	1.67205	FALSE	FALSE
NM_181278	55	111	78521	B230219D22Rik	2.33903	2.63819	FALSE	FALSE
NM_011544	55	81	21406	Tcf12	2.33903	2.50135	FALSE	FALSE
NM_024261	38	31	73419	1700052N19Rik	2.17845	2.08423	FALSE	FALSE
NM_211357	133	123	14050	Eya3	2.72252	2.68277	FALSE	FALSE
NM_133833	34	136	13518	Dst	2.13014	2.7264	FALSE	FALSE
NM_207206	5	16	99010	Lpcat4	1.29764	1.79698	FALSE	FALSE
NM_008018	17	76	14218	Sh3pxd2a	1.82911	2.47368	FALSE	FALSE
NM_001242396	48	83	108829	Jmjd1c	2.27991	2.51194	FALSE	FALSE
NM_145630	36	80	236900	Pdk3	2.15497	2.49595	FALSE	FALSE
NM_001177546	11	24	667666	Zfp600	1.64006	1.97308	FALSE	FALSE
NM_001172093	33	49	76131	Depdc1a	2.11718	2.28306	FALSE	FALSE
NM_009457	681	767	22201	Uba1	3.43181	3.47766	FALSE	FALSE
NM_001025779	13	20	23834	Cdc6	1.71261	1.89389	FALSE	FALSE
NM_027192	28	54	69737	Ttl	2.04582	2.32526	FALSE	FALSE
NM_009097	89	83	20111	Rps6ka1	2.54806	2.51194	FALSE	FALSE
NM_016888	233	549	53625	B3gnt2	2.96602	3.33244	FALSE	FALSE
NM_175277	14	49	78653	Bola3	1.74479	2.28306	FALSE	FALSE
NM_001081355	30	81	110593	Prdm2	2.07579	2.50135	FALSE	FALSE
NM_024203	34	38	67544	Fam120b	2.13014	2.17265	FALSE	FALSE
NM_001045540	141	192	620913	Gm12185	2.74788	2.87617	FALSE	FALSE
NM_133895	123	146	100561	Slc15a4	2.68857	2.75722	FALSE	FALSE
NM_001077707	31	28	268281	Shprh	2.09003	2.04002	FALSE	FALSE
NM_029077	210	153	74735	Trim14	2.92089	2.77756	FALSE	FALSE
NM_001253848	98	166	104836	Cbll1	2.58989	2.81297	FALSE	FALSE
NM_001159317	83	147	16180	Il1rap	2.51774	2.76018	FALSE	FALSE
NM_001039150	7439	21158	12505	Cd44	4.47018	4.91834	FALSE	FALSE
NM_080461	6	11	140482	Zfp358	1.37682	1.63426	FALSE	FALSE
NM_133792	504	549	192654	Pla2g15	3.3011	3.33244	FALSE	FALSE
NM_144800	100	99	211401	Mtss1	2.59867	2.5885	FALSE	FALSE
NM_025626	25	96	66540	Fam107b	1.99661	2.57514	FALSE	FALSE
NM_021385	72	227	58186	Rad18	2.456	2.94889	FALSE	FALSE
NM_001010825	13	12	231630	Ficd	1.71261	1.67205	FALSE	FALSE
NM_027534	47	91	70750	Kdsr	2.27076	2.55191	FALSE	FALSE
NM_001101804_dup2	58	47	NA	NA	2.36209	2.26496	FALSE	FALSE
NM_133918	80	57	100952	Emilin1	2.50176	2.34874	FALSE	FALSE
NM_022999	33	23	65116	Prrg2	2.11718	1.95459	FALSE	FALSE
NM_001102458	180	706	54375	Azin1	2.85394	3.44167	FALSE	FALSE
NM_001081258	15	15	381293	Kif14	1.77476	1.76896	FALSE	FALSE
NM_001039356	466	575	15361	Hmga1	3.26705	3.35253	FALSE	FALSE
NM_207215	17	48	105689	Mycbp2	1.82911	2.27411	FALSE	FALSE
NM_133248	14	16	170823	Glmn	1.74479	1.79698	FALSE	FALSE
NM_016981	32	33	20544	Slc9a1	2.10382	2.11138	FALSE	FALSE
NM_146099	53	112	226178	Wbp1l	2.32294	2.64208	FALSE	FALSE
NM_027109	423	443	69537	Dnase1l1	3.22501	3.23927	FALSE	FALSE
NM_001145778	37	27	72739	Zkscan3	2.16687	2.02423	FALSE	FALSE
NM_025693	17	12	66664	Tmem41a	1.82911	1.67205	FALSE	FALSE
NM_001081144	5	11	100515	Zfp518b	1.29764	1.63426	FALSE	FALSE
NM_027541	96	109	70767	Prpf3	2.58094	2.63029	FALSE	FALSE
NM_001033237	14	16	208146	Yeats2	1.74479	1.79698	FALSE	FALSE
NM_001113214	63	55	18286	Odf2	2.39801	2.33323	FALSE	FALSE
NM_009462	67	70	22224	Usp10	2.42474	2.43796	FALSE	FALSE
NM_001004190	6	12	434377	Zfp560	1.37682	1.67205	FALSE	FALSE
NM_172777	76	94	236573	Gbp9	2.47948	2.56599	FALSE	FALSE
NM_146002	33	85	215160	Rhbdd2	2.11718	2.52228	FALSE	FALSE
NM_001162939	78	66	68048	Aen	2.49076	2.41241	FALSE	FALSE
NM_172584	46	52	217837	Itpk1	2.26142	2.30887	FALSE	FALSE
NM_026195	425	281	108147	Atic	3.22705	3.04157	FALSE	FALSE
NM_145573	42	49	232536	Mrps35	2.22192	2.28306	FALSE	FALSE
NM_011368	120	207	20416	Shc1	2.67785	2.90884	FALSE	FALSE
NM_026865	5	12	73635	Ptges3l	1.29764	1.67205	FALSE	FALSE
NM_026340	35	23	67724	Pop1	2.14273	1.95459	FALSE	FALSE
NM_025363	34	26	66117	1110001J03Rik	2.13014	2.00784	FALSE	FALSE
NM_001168469	167	290	22192	Ube2m	2.82138	3.05526	FALSE	FALSE
NM_008906	4443	6081	19025	Ctsa	4.24634	4.37684	FALSE	FALSE
NM_001190800	119	120	234733	Ddx19b	2.67421	2.67205	FALSE	FALSE
NM_025433	593	659	66229	Rpl7l1	3.37172	3.41175	FALSE	FALSE
NM_001159883	33	148	56812	Dnajb2	2.11718	2.76313	FALSE	FALSE
NM_030116	109	181	78523	Mrpl9	2.63609	2.85054	FALSE	FALSE
NM_015801	20	17	50767	Pnpla6	1.8997	1.82331	FALSE	FALSE
NM_001136259	157	189	21968	Tom1	2.79457	2.86933	FALSE	FALSE
NM_173019	52	34	270198	Pfkfb4	2.31467	2.12434	FALSE	FALSE
NM_009145	1552	2469	20320	Nptn	3.78956	3.98539	FALSE	FALSE
NM_026546	40	17	68073	Fam173b	2.20073	1.82331	FALSE	FALSE
NM_145924	8	15	102920	Cenpi	1.50176	1.76896	FALSE	FALSE
NM_009615	1004	2512	11491	Adam17	3.6004	3.99288	FALSE	FALSE
NM_028427	20	60	73067	Tmem192	1.8997	2.37102	FALSE	FALSE
NM_008753	210	484	18245	Oaz1	2.92089	3.27771	FALSE	FALSE
NM_178065	27	22	68497	Arel1	2.03003	1.93529	FALSE	FALSE
NM_175170	2	17	71592	Pogk	1	1.82331	FALSE	FALSE
NM_025994	1805	2117	27984	Efhd2	3.85514	3.91859	FALSE	FALSE
NM_001163161	2512	2848	17474	Clec4d	3.99869	4.0474	FALSE	FALSE
NM_130454	21	6	170472	Recql5	1.92089	1.37102	FALSE	FALSE
NM_011221	81	189	19291	Purb	2.50715	2.86933	FALSE	FALSE
NM_001199205	137	540	70834	Spag9	2.73539	3.32526	FALSE	FALSE
NM_134151	148	142	107271	Yars	2.76893	2.74515	FALSE	FALSE
NM_028243	312	534	72461	Prcp	3.09282	3.32041	FALSE	FALSE
NM_001159595	75	113	72656	Ints8	2.47373	2.64594	FALSE	FALSE
NM_145951	18	27	209224	Enox2	1.85394	2.02423	FALSE	FALSE
NM_011971	1171	807	26446	Psmb3	3.66722	3.49974	FALSE	FALSE
NM_028913	5	13	74400	Zfp819	1.29764	1.70681	FALSE	FALSE
NM_172203	73	269	237038	Nox1	2.46199	3.02262	FALSE	FALSE
NM_007763	866	823	12925	Crip1	3.53618	3.50826	FALSE	FALSE
NM_173873	32	35	12725	Clcn3	2.10382	2.13693	FALSE	FALSE
NM_170591	188	211	71844	Nupl1	2.87282	2.91715	FALSE	FALSE
NM_011672	328	386	22230	Ufd1l	3.11454	3.17945	FALSE	FALSE
NM_008520	29	78	16998	Ltbp3	2.06106	2.48496	FALSE	FALSE
NM_001037758	39	41	12234	Btrc	2.18973	2.20565	FALSE	FALSE
NM_001110192	423	374	16331	Inpp5d	3.22501	3.16574	FALSE	FALSE
NM_010680	2	17	16774	Lama3	1	1.82331	FALSE	FALSE
NM_028614	122	82	73699	Ppp2r1b	2.68503	2.50668	FALSE	FALSE
NM_025486	148	154	66320	Tmem208	2.76893	2.78039	FALSE	FALSE
NM_001039239	16	25	630579	Zfp808	1.80279	1.9908	FALSE	FALSE
NM_001198912	278	373	16800	Arhgef2	3.04271	3.16457	FALSE	FALSE
NM_173374	624	695	110809	Srsf1	3.39385	3.43485	FALSE	FALSE
NM_010860	3833	4124	17904	Myl6	4.1822	4.20818	FALSE	FALSE
NM_010561	100	106	16201	Ilf3	2.59867	2.61817	FALSE	FALSE
NM_001161369	139	248	268996	Ss18	2.74168	2.98732	FALSE	FALSE
NM_153152	199	202	224904	2410015M20Rik	2.89752	2.89822	FALSE	FALSE
NM_019456	976	2115	54519	Apbb1ip	3.58812	3.91818	FALSE	FALSE
NM_153783	24	16	212503	Paox	1.97888	1.79698	FALSE	FALSE
NM_029701	355	344	76687	Spcs3	3.14889	3.12942	FALSE	FALSE
NM_001130150	138	188	16801	Arhgef1	2.73854	2.86702	FALSE	FALSE
NM_001205173	37	70	212632	Iffo2	2.16687	2.43796	FALSE	FALSE
NM_027462	15	49	70560	Wars2	1.77476	2.28306	FALSE	FALSE
NM_008054	27	63	14360	Fyn	2.03003	2.39221	FALSE	FALSE
NM_001253862	55	81	21406	Tcf12	2.33903	2.50135	FALSE	FALSE
NM_011179	16154	21958	19156	Psap	4.80695	4.93446	FALSE	FALSE
NM_001159331	23	37	67768	N6amt1	1.96039	2.16107	FALSE	FALSE
NM_178357	7	30	194655	Klf11	1.44376	2.06999	FALSE	FALSE
NM_009787	452	797	12304	Pdia4	3.2538	3.49432	FALSE	FALSE
NM_027156	28	33	69663	Ddx51	2.04582	2.11138	FALSE	FALSE
NM_021499	23	38	59002	Wrap73	1.96039	2.17265	FALSE	FALSE
NM_026744	50	34	68499	Mrpl53	2.29764	2.12434	FALSE	FALSE
NM_053177	85	166	94178	Mcoln1	2.52808	2.81297	FALSE	FALSE
NM_001242943	44	45	100190996	Gm14436	2.24212	2.24608	FALSE	FALSE
NM_133932	47	48	101206	Tada3	2.27076	2.27411	FALSE	FALSE
NM_018868	291	513	55989	Nop58	3.06256	3.30298	FALSE	FALSE
NM_001024952	18	30	381305	Rc3h1	1.85394	2.06999	FALSE	FALSE
NM_001085500	63	40	217149	Cisd3	2.39801	2.19492	FALSE	FALSE
NM_008021	15	24	14235	Foxm1	1.77476	1.97308	FALSE	FALSE
NM_001042620	380	729	13204	Dhx15	3.17845	3.45559	FALSE	FALSE
NM_178788	16	7	320685	Dctd	1.80279	1.43796	FALSE	FALSE
NM_144549	236	457	211770	Trib1	2.97158	3.25278	FALSE	FALSE
NM_172724	29	12	231841	Brat1	2.06106	1.67205	FALSE	FALSE
NM_146073	13	20	224454	Zdhhc14	1.71261	1.89389	FALSE	FALSE
NM_001109972	814	662	20335	Sec61g	3.50929	3.41372	FALSE	FALSE
NM_153592	228	286	244373	Erlin2	2.9566	3.04923	FALSE	FALSE
NM_021402	130	329	140499	Ube2j2	2.71261	3.11006	FALSE	FALSE
NM_133756	102	64	74254	Gpn1	2.60727	2.39904	FALSE	FALSE
NM_001100449	4	18	72504	Taf4b	1.20073	1.84814	FALSE	FALSE
NM_001164072	446	1722	21353	Tank	3.248	3.8289	FALSE	FALSE
NM_028070	24	25	72041	Alkbh4	1.97888	1.9908	FALSE	FALSE
NM_025518	38	36	66369	Dus2	2.17845	2.14917	FALSE	FALSE
NM_133697	73	88	68552	Smim14	2.46199	2.53735	FALSE	FALSE
NM_175224	218	265	75624	Metap1	2.93712	3.01611	FALSE	FALSE
NM_001251833	18	7	93681	Zkscan8	1.85394	1.43796	FALSE	FALSE
NM_026007	2411	2013	67160	Eef1g	3.98086	3.89671	FALSE	FALSE
NM_008638	208	188	17768	Mthfd2	2.91673	2.86702	FALSE	FALSE
NM_001098836	13	15	217218	Atxn7l3	1.71261	1.76896	FALSE	FALSE
NM_001170851	45	30	16633	Klra2	2.25188	2.06999	FALSE	FALSE
NM_008898	1350	1518	18984	Por	3.729	3.77414	FALSE	FALSE
NM_001163770	22	22	112403	Dxo	1.94109	1.93529	FALSE	FALSE
NM_001082974	15	6	415115	Neurl2	1.77476	1.37102	FALSE	FALSE
NM_175251	27	69	77044	Arid2	2.03003	2.43171	FALSE	FALSE
NM_011580	372	1230	21825	Thbs1	3.16921	3.68277	FALSE	FALSE
NM_007644	284	415	12492	Scarb2	3.05198	3.21091	FALSE	FALSE
NM_145436	173	456	217232	Cdc27	2.83671	3.25183	FALSE	FALSE
NM_026520	25	79	68034	Fam122a	1.99661	2.49049	FALSE	FALSE
NM_153196	45	47	71336	Rbks	2.25188	2.26496	FALSE	FALSE
NM_001085492	12	10	68703	Rere	1.67785	1.59286	FALSE	FALSE
NM_001025263	383	642	21985	Tpd52	3.18186	3.4004	FALSE	FALSE
NM_153057	127	251	211548	Nomo1	2.70247	2.99254	FALSE	FALSE
NM_001110853	28	39	12916	Crem	2.04582	2.18393	FALSE	FALSE
NM_001164227	36	41	18181	Nrf1	2.15497	2.20565	FALSE	FALSE
NM_011603	29	38	237336	Tbpl1	2.06106	2.17265	FALSE	FALSE
NM_015759	202	172	30938	Fgd3	2.90402	2.82839	FALSE	FALSE
NM_146194	1748	5728	233489	Picalm	3.84121	4.35087	FALSE	FALSE
NM_172391	70	99	268390	Ahsa2	2.44376	2.5885	FALSE	FALSE
NM_007631	1193	519	12443	Ccnd1	3.67531	3.30803	FALSE	FALSE
NM_001163590	61	214	74732	Stx11	2.384	2.92328	FALSE	FALSE
NM_145483	12	32	224585	Zfp160	1.67785	2.09801	FALSE	FALSE
NM_018730	1049	1063	54217	Rpl36	3.61944	3.6194	FALSE	FALSE
NM_133198	167	87	110095	Pygl	2.82138	2.53238	FALSE	FALSE
NM_001163301	61	59	19302	Pex2	2.384	2.36372	FALSE	FALSE
NM_011489	134	377	20851	Stat5b	2.72577	3.16921	FALSE	FALSE
NM_028782	75	106	74142	Lonp1	2.47373	2.61817	FALSE	FALSE
NM_001163019	31	30	97159	A430005L14Rik	2.09003	2.06999	FALSE	FALSE
NM_144897	200	226	246703	Apoa1bp	2.8997	2.94697	FALSE	FALSE
NM_146200	831	841	56347	Eif3c	3.51827	3.51766	FALSE	FALSE
NM_001163451	17	43	30957	Mapk8ip3	1.82911	2.22633	FALSE	FALSE
NM_019737	64	75	56386	B4galt6	2.40485	2.46793	FALSE	FALSE
NM_001146296	155	176	56417	Adar	2.789	2.83838	FALSE	FALSE
NM_145609	113	132	78100	Msantd4	2.65174	2.71344	FALSE	FALSE
NM_001177627	515	1243	227659	Slc2a6	3.31047	3.68734	FALSE	FALSE
NM_007455	67	44	11766	Ap1g2	2.42474	2.23632	FALSE	FALSE
NM_016677	430	819	53602	Hpcal1	3.23213	3.50615	FALSE	FALSE
NM_028126	71	42	72149	Strada	2.44992	2.21611	FALSE	FALSE
NM_029491	68	78	75964	Trappc8	2.43117	2.48496	FALSE	FALSE
NM_177730	57	126	242291	Impad1	2.35454	2.69324	FALSE	FALSE
NM_023422	11735	18246	68024	Hist1h2bc	4.66815	4.85403	FALSE	FALSE
NM_009578	157	336	22778	Ikzf1	2.79457	3.1192	FALSE	FALSE
NM_030084	146	203	78308	Gpr108	2.76302	2.90036	FALSE	FALSE
NM_011342	259	495	20333	Sec22b	3.01197	3.28747	FALSE	FALSE
NM_001085409	57	69	68428	Steap3	2.35454	2.43171	FALSE	FALSE
NM_001146223	102	101	66310	Dpy30	2.60727	2.59719	FALSE	FALSE
NM_001080389	114	324	13728	Mark2	2.65557	3.10341	FALSE	FALSE
NM_023646	140	160	83945	Dnaja3	2.74479	2.79698	FALSE	FALSE
NM_028193	20	30	72308	Brf1	1.8997	2.06999	FALSE	FALSE
NM_008960	49	132	19211	Pten	2.28886	2.71344	FALSE	FALSE
NM_001025586	65	58	75692	Nr2c2ap	2.41158	2.35629	FALSE	FALSE
NM_008379	585	473	16211	Kpnb1	3.36582	3.26773	FALSE	FALSE
NM_001123386	21	55	12593	Cdyl	1.92089	2.33323	FALSE	FALSE
NM_001035526	37	32	100317	AU040320	2.16687	2.09801	FALSE	FALSE
NM_145426	275	219	216760	Mfap3	3.038	2.93331	FALSE	FALSE
NM_001037810	66	73	20737	Spn	2.41821	2.45619	FALSE	FALSE
NM_001163360	66	71	60530	Fignl1	2.41821	2.44412	FALSE	FALSE
NM_022880	164	309	63959	Slc29a1	2.81351	3.08282	FALSE	FALSE
NM_001163430	39	41	50721	Sirt6	2.18973	2.20565	FALSE	FALSE
NM_001110498	696	1099	15976	Ifnar2	3.44128	3.63386	FALSE	FALSE
NM_001164109	74	95	18018	Nfatc1	2.4679	2.57059	FALSE	FALSE
NM_001001983	58	72	224020	Pi4ka	2.36209	2.4502	FALSE	FALSE
NM_001037717	99	175	625098	Slc38a6	2.5943	2.8359	FALSE	FALSE
NM_001172069	18	17	71599	Senp8	1.85394	1.82331	FALSE	FALSE
NM_145138	90	126	217718	Nek9	2.55291	2.69324	FALSE	FALSE
NM_145220	65	38	216190	Appl2	2.41158	2.17265	FALSE	FALSE
NM_001024854	39	22	30056	Timm9	2.18973	1.93529	FALSE	FALSE
NM_010236	22	25	14287	Fpgs	1.94109	1.9908	FALSE	FALSE
NM_178589	11	8	94185	Tnfrsf21	1.64006	1.49595	FALSE	FALSE
NM_021364	568	491	23845	Clec5a	3.35301	3.28395	FALSE	FALSE
NM_011327	67	74	20280	Scp2	2.42474	2.4621	FALSE	FALSE
NM_028385	31	79	72895	Setd5	2.09003	2.49049	FALSE	FALSE
NM_001168295	1	12	238393	Serpina3f	1	1.67205	FALSE	FALSE
NM_001040395	18	34	68646	Nadk2	1.85394	2.12434	FALSE	FALSE
NM_010478	198	439	15511	Hspa1b	2.89533	3.23533	FALSE	FALSE
NM_001037762	62	48	66220	Zdhhc12	2.39106	2.27411	FALSE	FALSE
NM_028136	86	143	72162	Dhx36	2.53316	2.7482	FALSE	FALSE
NM_201391	885	1587	18810	Plec	3.54561	3.79344	FALSE	FALSE
NM_010760	260	390	17149	Magoh	3.01364	3.18393	FALSE	FALSE
NM_027999	22	16	71909	Haus5	1.94109	1.79698	FALSE	FALSE
NM_008400	406	329	16408	Itgal	3.20719	3.11006	FALSE	FALSE
NM_138303	28	14	74766	Yipf2	2.04582	1.73899	FALSE	FALSE
NM_011293	141	141	20022	Polr2j	2.74788	2.74208	FALSE	FALSE
NM_027739	51	68	14421	B4galnt1	2.30624	2.42537	FALSE	FALSE
NM_001033960	71	113	227800	Rabgap1	2.44992	2.64594	FALSE	FALSE
NM_027201	39	53	69752	Zfp511	2.18973	2.31714	FALSE	FALSE
NM_009564	9	12	22722	Zfp64	1.55291	1.67205	FALSE	FALSE
NM_001012305	5	11	277468	Slc39a12	1.29764	1.63426	FALSE	FALSE
NM_001033308	248	216	230787	Themis2	2.99312	2.92732	FALSE	FALSE
NM_028778	74	200	74137	Nuak2	2.4679	2.89389	FALSE	FALSE
NM_001168668	45	53	67726	Fam114a2	2.25188	2.31714	FALSE	FALSE
NM_001161847	243	415	20393	Sgk1	2.98427	3.21091	FALSE	FALSE
NM_175645	29	70	233781	Xylt1	2.06106	2.43796	FALSE	FALSE
NM_001163485	2340	3330	19946	Rpl30	3.96788	4.11531	FALSE	FALSE
NM_001168220	40	32	66356	Knop1	2.20073	2.09801	FALSE	FALSE
NM_001081011	131	107	14270	Srgap2	2.71594	2.62225	FALSE	FALSE
NM_146135	14	14	229615	Pias3	1.74479	1.73899	FALSE	FALSE
NM_001081309	38	53	75669	Pik3r4	2.17845	2.31714	FALSE	FALSE
NM_178633	16	44	77113	Klhl2	1.80279	2.23632	FALSE	FALSE
NM_001256130	95	124	93790	Nipa2	2.57639	2.68629	FALSE	FALSE
NM_172882	22	37	72145	Wdfy3	1.94109	2.16107	FALSE	FALSE
NM_009119	598	779	20220	Sap18	3.37537	3.4844	FALSE	FALSE
NM_009003	2	14	19341	Rab4a	1	1.73899	FALSE	FALSE
NM_019873	25	46	56299	Fkbpl	1.99661	2.25562	FALSE	FALSE
NM_009649	37	150	11641	Akap2	2.16687	2.76896	FALSE	FALSE
NM_019679	202	155	57778	Fmnl1	2.90402	2.7832	FALSE	FALSE
NM_008848	463	478	18729	Pira6	3.26425	3.27229	FALSE	FALSE
NM_028521	32	12	73373	Phospho2	2.10382	1.67205	FALSE	FALSE
NM_176987	6	15	319719	Simc1	1.37682	1.76896	FALSE	FALSE
NM_022332	125	252	64213	St7	2.69558	2.99427	FALSE	FALSE
NM_026174	27	36	67464	Entpd4	2.03003	2.14917	FALSE	FALSE
NM_025557	32	28	66425	Pcp4l1	2.10382	2.04002	FALSE	FALSE
NM_016876	552	598	53356	Eif3g	3.3406	3.36957	FALSE	FALSE
NM_001252574	15	17	228875	Slc35c2	1.77476	1.82331	FALSE	FALSE
NM_030560	54	77	80744	Cwc22	2.33106	2.47936	FALSE	FALSE
NM_030678	147	167	14936	Gys1	2.76598	2.81558	FALSE	FALSE
NM_001141975	176	262	72119	Tpx2	2.84418	3.01117	FALSE	FALSE
NM_027379	227	197	67420	Far1	2.95469	2.88733	FALSE	FALSE
NM_029632	131	266	76497	Ppp1r11	2.71594	3.01775	FALSE	FALSE
NM_177993	305	903	73389	Hbp1	3.08297	3.54855	FALSE	FALSE
NM_026040	73	93	67222	Srfbp1	2.46199	2.56135	FALSE	FALSE
NM_008677	1013	921	17972	Ncf4	3.60428	3.55712	FALSE	FALSE
NM_001252440	24	95	67102	D16Ertd472e	1.97888	2.57059	FALSE	FALSE
NM_019565	16	19	56220	Zfp386	1.80279	1.87162	FALSE	FALSE
NM_009775	1001	820	12257	Tspo	3.5991	3.50668	FALSE	FALSE
NM_025889	13	19	66990	Tmem134	1.71261	1.87162	FALSE	FALSE
NM_023331	118	106	67308	Mrpl46	2.67055	2.61817	FALSE	FALSE
NM_177852	27	45	23856	Dido1	2.03003	2.24608	FALSE	FALSE
NM_013754	45	46	27356	Insl6	2.25188	2.25562	FALSE	FALSE
NM_181589	150	162	70466	Ckap2l	2.77476	2.80238	FALSE	FALSE
NM_025522	123	161	66375	Dhrs7	2.68857	2.79969	FALSE	FALSE
NM_178084	67	174	65964	Zak	2.42474	2.83341	FALSE	FALSE
NM_001025156	93	159	70829	Ccdc93	2.56715	2.79426	FALSE	FALSE
NM_026417	187	328	67864	Yipf4	2.87051	3.10874	FALSE	FALSE
NM_011851	36	41	23959	Nt5e	2.15497	2.20565	FALSE	FALSE
NM_001033537	17	25	320655	Pgap3	1.82911	1.9908	FALSE	FALSE
NM_001122594	4	17	244650	Phlpp2	1.20073	1.82331	FALSE	FALSE
NM_001110201	251	323	77254	Yif1b	2.99834	3.10207	FALSE	FALSE
NM_001113356	31	26	667277	C1rb	2.09003	2.00784	FALSE	FALSE
NM_008602	18	21	17344	Pias2	1.85394	1.91508	FALSE	FALSE
NM_013538	80	137	14793	Cdca3	2.50176	2.72959	FALSE	FALSE
NM_031181	204	155	83382	Siglece	2.9083	2.7832	FALSE	FALSE
NM_145361	24	23	208198	Btbd2	1.97888	1.95459	FALSE	FALSE
NM_001159574	115	285	66899	Fip1l1	2.65936	3.04771	FALSE	FALSE
NM_177364	211	502	268396	Sh3pxd2b	2.92295	3.29357	FALSE	FALSE
NM_008152	98	67	14744	Gpr65	2.58989	2.41894	FALSE	FALSE
NM_001128170	48	32	74256	Cyld	2.27991	2.09801	FALSE	FALSE
NM_001253700	146	195	54351	Elp5	2.76302	2.8829	FALSE	FALSE
NM_198622	26	51	243529	H1fx	2.01364	2.30044	FALSE	FALSE
NM_080556	777	1139	68059	Tm9sf2	3.48909	3.64939	FALSE	FALSE
NM_030692	279	305	83493	Sacm1l	3.04427	3.07716	FALSE	FALSE
NM_133665	74	189	17261	Mef2d	2.4679	2.86933	FALSE	FALSE
NM_026963	47	41	69151	Lzic	2.27076	2.20565	FALSE	FALSE
NM_009397	2879	11718	21929	Tnfaip3	4.05791	4.66172	FALSE	FALSE
NM_177470	97	88	52538	Acaa2	2.58544	2.53735	FALSE	FALSE
NM_001243064	300	391	12389	Cav1	3.07579	3.18504	FALSE	FALSE
NM_172132	50	62	193796	Kdm4b	2.29764	2.38526	FALSE	FALSE
NM_019770	524	1353	56334	Tmed2	3.318	3.72416	FALSE	FALSE
NM_001199004	48	108	27277	Golga5	2.27991	2.62629	FALSE	FALSE
NM_011521	6778	19198	20971	Sdc4	4.42977	4.87612	FALSE	FALSE
NM_133852	79	83	99412	Golga2	2.49629	2.51194	FALSE	FALSE
NM_134471	81	72	73804	Kif2c	2.50715	2.4502	FALSE	FALSE
NM_001081392	35	38	100019	Mdn1	2.14273	2.17265	FALSE	FALSE
NM_025706	195	451	66687	Tbc1d15	2.8887	3.24704	FALSE	FALSE
NM_010913	336	598	18044	Nfya	3.12501	3.36957	FALSE	FALSE
NM_027748	9	13	209361	Taf3	1.55291	1.70681	FALSE	FALSE
NM_027270	71	109	69940	Exoc1	2.44992	2.63029	FALSE	FALSE
NM_009537	120	232	22632	Yy1	2.67785	2.95835	FALSE	FALSE
NM_026273	51	132	67609	4930453N24Rik	2.30624	2.71344	FALSE	FALSE
NM_001033713	392	1098	17258	Mef2a	3.19195	3.63347	FALSE	FALSE
NM_001164192	117	166	17772	Mtm1	2.66685	2.81297	FALSE	FALSE
NM_001205053	141	578	81703	Jdp2	2.74788	3.35479	FALSE	FALSE
NM_027977	165	237	71881	Apmap	2.81615	2.96761	FALSE	FALSE
NM_001081378	69	105	77480	Kidins220	2.43751	2.61405	FALSE	FALSE
NM_001145034	98	585	620695	Gm13889	2.58989	3.36002	FALSE	FALSE
NM_001045525	25	26	327951	Cyb5d1	1.99661	2.00784	FALSE	FALSE
NM_001004140	52	51	80986	Ckap2	2.31467	2.30044	FALSE	FALSE
NM_001079830	12	37	94093	Trim33	1.67785	2.16107	FALSE	FALSE
NM_007683	47	69	12617	Cenpc1	2.27076	2.43171	FALSE	FALSE
NM_001164314	240	257	22375	Wars	2.97888	3.0028	FALSE	FALSE
NM_009542	11	17	22643	Zfp101	1.64006	1.82331	FALSE	FALSE
NM_001012363	2	16	117591	Slc2a9	1	1.79698	FALSE	FALSE
NM_001033326	55	152	236082	Dhrsx	2.33903	2.77471	FALSE	FALSE
NM_013923	56	153	30945	Rnf19a	2.34685	2.77756	FALSE	FALSE
NM_028756	42	52	74102	Slc35a5	2.22192	2.30887	FALSE	FALSE
NM_001001176	58	48	407786	Taf9b	2.36209	2.27411	FALSE	FALSE
NM_029423	358	1543	75767	Rab11fip1	3.15255	3.78123	FALSE	FALSE
NM_146153	199	332	230753	Thrap3	2.89752	3.114	FALSE	FALSE
NM_025283	331	594	19070	Mob4	3.11849	3.36665	FALSE	FALSE
NM_138956	26	44	192678	Rassf3	2.01364	2.23632	FALSE	FALSE
NM_001039180	106	98	76895	Bicd2	2.62397	2.58409	FALSE	FALSE
NM_001204915	179	491	28193	Reep3	2.85152	3.28395	FALSE	FALSE
NM_001146084	42	30	380601	Fastkd5	2.22192	2.06999	FALSE	FALSE
NM_021337	71	63	108077	Skiv2l	2.44992	2.39221	FALSE	FALSE
NM_011396	47	113	20520	Slc22a5	2.27076	2.64594	FALSE	FALSE
NM_134040	213	313	104721	Ddx1	2.92705	3.08841	FALSE	FALSE
NM_029157	235	308	75062	Sf3a3	2.96973	3.08142	FALSE	FALSE
NM_178893	142	230	107684	Coro2a	2.75095	2.95459	FALSE	FALSE
NM_172622	13	9	224829	Trerf1	1.71261	1.54711	FALSE	FALSE
NM_198011	6	11	101604	E430018J23Rik	1.37682	1.63426	FALSE	FALSE
NM_152817	59	49	74196	Ttc27	2.36952	2.28306	FALSE	FALSE
NM_021526	851	1023	59029	Psmd14	3.5286	3.60274	FALSE	FALSE
NM_009832	104	128	12454	Ccnk	2.6157	2.70007	FALSE	FALSE
NM_009713	49	46	11883	Arsa	2.28886	2.25562	FALSE	FALSE
NM_177337	35	13	219144	Arl11	2.14273	1.70681	FALSE	FALSE
NM_173399	10	16	230119	Zbtb5	1.59867	1.79698	FALSE	FALSE
NM_199302	17	15	227738	Lrsam1	1.82911	1.76896	FALSE	FALSE
NM_183046	34	36	240641	Kif20b	2.13014	2.14917	FALSE	FALSE
NM_001033155	53	118	70604	Dnajb14	2.32294	2.66475	FALSE	FALSE
NM_172569	32	95	217331	Unk	2.10382	2.57059	FALSE	FALSE
NM_007711	30	42	12725	Clcn3	2.07579	2.21611	FALSE	FALSE
NM_019936	144	213	56724	Cript	2.75703	2.92124	FALSE	FALSE
NM_026325	142	221	67706	Tmem179b	2.75095	2.93726	FALSE	FALSE
NM_194257	50	96	109229	Fam118b	2.29764	2.57514	FALSE	FALSE
NM_020042	168	249	56738	Mocs1	2.82398	2.98906	FALSE	FALSE
NM_001165995	59	151	76688	Arfrp1	2.36952	2.77184	FALSE	FALSE
NM_001104529	22	23	64095	Gpr35	1.94109	1.95459	FALSE	FALSE
NM_001142923	33	50	21416	Tcf7l2	2.11718	2.29183	FALSE	FALSE
NM_001161410	68	33	217449	Trappc12	2.43117	2.11138	FALSE	FALSE
NM_001163531	27	25	72392	Tmem175	2.03003	1.9908	FALSE	FALSE
NM_015824	120	85	50793	Orc3	2.67785	2.52228	FALSE	FALSE
NM_001159552	230	209	14950	H13	2.96039	2.91301	FALSE	FALSE
NM_177342	7	23	226182	Taf5	1.44376	1.95459	FALSE	FALSE
NM_025812	87	116	66867	Hmg20a	2.53819	2.65732	FALSE	FALSE
NM_001077696	21	18	15184	Hdac5	1.92089	1.84814	FALSE	FALSE
NM_026677	35	36	68328	Rab13	2.14273	2.14917	FALSE	FALSE
NM_029571	32	35	100087	Kti12	2.10382	2.13693	FALSE	FALSE
NM_020266	30	123	56812	Dnajb2	2.07579	2.68277	FALSE	FALSE
NM_026127	24	9	67392	4833420G17Rik	1.97888	1.54711	FALSE	FALSE
NM_145501	184	263	84095	Pi4k2a	2.86348	3.01282	FALSE	FALSE
NM_026390	241	511	67812	Ubxn4	2.98068	3.30129	FALSE	FALSE
NM_023524	36	28	69714	Tfpt	2.15497	2.04002	FALSE	FALSE
NM_020491	72	36	56390	Sssca1	2.456	2.14917	FALSE	FALSE
NM_025311	31	42	66039	Tmem254a	2.09003	2.21611	FALSE	FALSE
NM_175115	54	204	67143	Ikzf5	2.33106	2.9025	FALSE	FALSE
NM_025979	24	32	67121	Mastl	1.97888	2.09801	FALSE	FALSE
NM_011895	47	52	24060	Slc35a1	2.27076	2.30887	FALSE	FALSE
NM_025441	113	190	66244	Nemf	2.65174	2.87162	FALSE	FALSE
NM_009847	71	128	12488	Cd2ap	2.44992	2.70007	FALSE	FALSE
NM_001252493	17	26	64291	Osbpl1a	1.82911	2.00784	FALSE	FALSE
NM_001143689	2568	6126	15015	H2-Q4	4.00826	4.38004	FALSE	FALSE
NM_026602	114	123	68183	Bcas2	2.65557	2.68277	FALSE	FALSE
NM_001252202	135	485	26921	Map4k4	2.729	3.27861	FALSE	FALSE
NM_145974	8	11	212706	N4bp3	1.50176	1.63426	FALSE	FALSE
NM_008866	246	282	18777	Lypla1	2.9896	3.04311	FALSE	FALSE
NM_001252552	6	16	14275	Folr1	1.37682	1.79698	FALSE	FALSE
NM_175357	127	189	58799	Crbn	2.70247	2.86933	FALSE	FALSE
NM_012010	883	694	26905	Eif2s3x	3.54463	3.43422	FALSE	FALSE
NM_001101430	50	39	69666	Psmg4	2.29764	2.18393	FALSE	FALSE
NM_001161739	14	16	170823	Glmn	1.74479	1.79698	FALSE	FALSE
NM_001042421	32	50	208628	Kntc1	2.10382	2.29183	FALSE	FALSE
NM_177038	68	78	75964	Trappc8	2.43117	2.48496	FALSE	FALSE
NM_028222	75	64	72391	Cdkn3	2.47373	2.39904	FALSE	FALSE
NM_001163557	49	48	19024	Ppfibp2	2.28886	2.27411	FALSE	FALSE
NM_177320	407	979	320207	Pik3r5	3.20826	3.58365	FALSE	FALSE
NM_026592	25	20	68170	B230118H07Rik	1.99661	1.89389	FALSE	FALSE
NM_001033472	25	66	382252	A830080D01Rik	1.99661	2.41241	FALSE	FALSE
NM_010269	31	62	14547	Gdap2	2.09003	2.38526	FALSE	FALSE
NM_183033	41	111	329003	Zfp516	2.21145	2.63819	FALSE	FALSE
NM_172833	945	4747	240354	Malt1	3.5741	4.26928	FALSE	FALSE
NM_153164	30	102	234594	Cnot1	2.07579	2.60147	FALSE	FALSE
NM_172262	11	18	218214	Kdm1b	1.64006	1.84814	FALSE	FALSE
NM_145567	204	333	58875	Hibadh	2.9083	3.11531	FALSE	FALSE
NM_001252585	84	51	228880	Zmynd8	2.52295	2.30044	FALSE	FALSE
NM_026875	11	22	66090	Ypel3	1.64006	1.93529	FALSE	FALSE
NM_009353	22	61	21750	Terf2	1.94109	2.37819	FALSE	FALSE
NM_019943	13	21	56522	Papolb	1.71261	1.91508	FALSE	FALSE
NM_001160040	215	304	227197	Ndufs1	2.9311	3.07574	FALSE	FALSE
NM_207634	2891	3265	20088	Rps24	4.05971	4.10675	FALSE	FALSE
NM_025377	27	50	66140	Ska2	2.03003	2.29183	FALSE	FALSE
NM_001165986	393	598	74383	Ubap2l	3.19306	3.36957	FALSE	FALSE
NM_013862	14	17	29809	Rabgap1l	1.74479	1.82331	FALSE	FALSE
NM_025427	25	45	66214	Rgcc	1.99661	2.24608	FALSE	FALSE
NM_013563	2394	5765	16186	Il2rg	3.97779	4.35366	FALSE	FALSE
NM_172406	20	19	70827	Trak2	1.8997	1.87162	FALSE	FALSE
NM_015811	1310	5858	50778	Rgs1	3.71594	4.36061	FALSE	FALSE
NM_018782	488	459	54598	Calcrl	3.28709	3.25468	FALSE	FALSE
NM_001122873	127	216	69459	Ubl7	2.70247	2.92732	FALSE	FALSE
NM_026660	134	217	68294	Mfsd10	2.72577	2.92932	FALSE	FALSE
NM_001252260	2183	2803	18148	Npm1	3.93772	4.04049	FALSE	FALSE
NM_009155	656	1196	20363	Sepp1	3.41557	3.6706	FALSE	FALSE
NM_026578	83	91	68147	Gar1	2.51774	2.55191	FALSE	FALSE
NM_019635	133	179	56274	Stk3	2.72252	2.84572	FALSE	FALSE
NM_173441	95	146	73473	Iws1	2.57639	2.75722	FALSE	FALSE
NM_026130	349	671	67398	Srpr	3.14149	3.41959	FALSE	FALSE
NM_145512	76	121	108735	Sft2d2	2.47948	2.67565	FALSE	FALSE
NM_025593	137	145	66491	Polr2l	2.73539	2.75423	FALSE	FALSE
NM_001252530	17	36	101488	Slco2b1	1.82911	2.14917	FALSE	FALSE
NM_025302	103	107	27398	Mrpl2	2.6115	2.62225	FALSE	FALSE
NM_175106	15	13	66343	Tmem177	1.77476	1.70681	FALSE	FALSE
NM_172288	63	48	234865	Nup133	2.39801	2.27411	FALSE	FALSE
NM_007481	439	662	11845	Arf6	3.24113	3.41372	FALSE	FALSE
NM_172958	59	198	268783	Mtmr12	2.36952	2.88953	FALSE	FALSE
NM_177782	132	193	277360	Prex1	2.71924	2.87842	FALSE	FALSE
NM_011886	151	262	24045	Scamp3	2.77764	3.01117	FALSE	FALSE
NM_031156	133	136	15925	Ide	2.72252	2.7264	FALSE	FALSE
NM_027335	141	144	70153	2210016F16Rik	2.74788	2.75123	FALSE	FALSE
NM_013888	75	162	30045	Dnajc12	2.47373	2.80238	FALSE	FALSE
NM_011231	166	238	19352	Rabggtb	2.81877	2.96944	FALSE	FALSE
NM_178408	78	69	215705	Arrdc1	2.49076	2.43171	FALSE	FALSE
NM_134141	373	1212	109006	Ciapin1	3.17037	3.67637	FALSE	FALSE
NM_178930	81	70	107338	Gbf1	2.50715	2.43796	FALSE	FALSE
NM_145479	23	15	224023	Klhl22	1.96039	1.76896	FALSE	FALSE
NM_018768	174	196	55943	Stx8	2.83922	2.88512	FALSE	FALSE
NM_007948	75	72	13870	Ercc1	2.47373	2.4502	FALSE	FALSE
NM_145941	240	219	208643	Eif4g1	2.97888	2.93331	FALSE	FALSE
NM_011961	30	30	26432	Plod2	2.07579	2.06999	FALSE	FALSE
NM_019680	140	294	56501	Elf4	2.74479	3.06121	FALSE	FALSE
NM_008813	29	51	18605	Enpp1	2.06106	2.30044	FALSE	FALSE
NM_013710	12	11	26382	Fgd2	1.67785	1.63426	FALSE	FALSE
NM_008732	345	548	18174	Slc11a2	3.13648	3.33165	FALSE	FALSE
NM_010122	50	30	13667	Eif2b4	2.29764	2.06999	FALSE	FALSE
NM_001167885	22	46	225888	Suv420h1	1.94109	2.25562	FALSE	FALSE
NM_173867	152	132	108911	Rcc2	2.78051	2.71344	FALSE	FALSE
NM_152800	73	105	30933	Tor2a	2.46199	2.61405	FALSE	FALSE
NM_001079904	15	19	58887	Repin1	1.77476	1.87162	FALSE	FALSE
NM_212438	18	35	22404	Wiz	1.85394	2.13693	FALSE	FALSE
NM_001005864	6	12	102103	Mtus1	1.37682	1.67205	FALSE	FALSE
NM_178691	15	47	226418	Yod1	1.77476	2.26496	FALSE	FALSE
NM_175511	14	5	241303	Fam78a	1.74479	1.29183	FALSE	FALSE
NM_001163706	66	59	50762	Fbxo6	2.41821	2.36372	FALSE	FALSE
NM_199221	231	141	217304	Cd300lb	2.96228	2.74208	FALSE	FALSE
NM_001093760	151	145	66975	Trappc13	2.77764	2.75423	FALSE	FALSE
NM_019468	122	87	14380	G6pd2	2.68503	2.53238	FALSE	FALSE
NM_009498	176	231	22319	Vamp3	2.84418	2.95648	FALSE	FALSE
NM_029711	3657	6226	76709	Arpc2	4.16179	4.38707	FALSE	FALSE
NM_001177750	28	32	100038538	Gm10767	2.04582	2.09801	FALSE	FALSE
NM_001114087	146	449	67399	Pdlim7	2.76302	3.24511	FALSE	FALSE
NM_206871	2	16	15969	Ifna6	1	1.79698	FALSE	FALSE
NM_153403	23	29	236511	Ago1	1.96039	2.05526	FALSE	FALSE
NM_027168	42	32	69692	Hddc2	2.22192	2.09801	FALSE	FALSE
NM_025636	47	33	66566	Ntpcr	2.27076	2.11138	FALSE	FALSE
NM_001253920	44	41	67605	Akt1s1	2.24212	2.20565	FALSE	FALSE
NM_001102444	164	160	11518	Add1	2.81351	2.79698	FALSE	FALSE
NM_001114609	27	68	227195	Ino80d	2.03003	2.42537	FALSE	FALSE
NM_021272	36	16	12140	Fabp7	2.15497	1.79698	FALSE	FALSE
NM_008031	40	158	14265	Fmr1	2.20073	2.79152	FALSE	FALSE
NM_001079694	397	827	20384	Srsf5	3.19746	3.51037	FALSE	FALSE
NM_194341	28	61	217030	Synrg	2.04582	2.37819	FALSE	FALSE
NM_010306	689	1264	14679	Gnai3	3.43689	3.69461	FALSE	FALSE
NM_144559	170	154	246256	Fcgr4	2.82911	2.78039	FALSE	FALSE
NM_001243161	67	92	207958	Alg11	2.42474	2.55665	FALSE	FALSE
NM_146067	55	55	223978	Cpped1	2.33903	2.33323	FALSE	FALSE
NM_009289	119	288	20874	Slk	2.67421	3.05226	FALSE	FALSE
NM_021434	18	27	58245	Gpr180	1.85394	2.02423	FALSE	FALSE
NM_001145881	14	42	232784	Zfp212	1.74479	2.21611	FALSE	FALSE
NM_133768	191	173	109900	Asl	2.8797	2.83091	FALSE	FALSE
NM_026721	82	106	68427	Slc39a13	2.51248	2.61817	FALSE	FALSE
NM_001033201	80	97	433702	Ncbp1	2.50176	2.57964	FALSE	FALSE
NM_178242	14	12	231861	Tnrc18	1.74479	1.67205	FALSE	FALSE
NM_019482	11	12	55991	Panx1	1.64006	1.67205	FALSE	FALSE
NM_001113518	410	466	54126	Arhgef7	3.21145	3.26125	FALSE	FALSE
NM_001190436	2580	3038	14109	Fau	4.01029	4.07545	FALSE	FALSE
NM_172741	15	32	233103	4931406P16Rik	1.77476	2.09801	FALSE	FALSE
NM_001162415	21	14	18640	Pfkfb2	1.92089	1.73899	FALSE	FALSE
NM_146012	17	39	52468	Ctdsp2	1.82911	2.18393	FALSE	FALSE
NM_027182	54	96	69716	Trip13	2.33106	2.57514	FALSE	FALSE
NM_001083318	396	1248	27049	Etv3	3.19636	3.68908	FALSE	FALSE
NM_001168497	66	92	70310	Plscr3	2.41821	2.55665	FALSE	FALSE
NM_001163618	48	44	71807	Tars2	2.27991	2.23632	FALSE	FALSE
NM_008916	80	105	19062	Inpp5k	2.50176	2.61405	FALSE	FALSE
NM_172693	8	23	230145	Galnt12	1.50176	1.95459	FALSE	FALSE
NM_025935	25	28	67046	Tbc1d7	1.99661	2.04002	FALSE	FALSE
NM_008369	100	109	16188	Il3ra	2.59867	2.63029	FALSE	FALSE
NM_023230	437	455	66589	Ube2v1	3.23915	3.25088	FALSE	FALSE
NM_009883	1610	3840	12608	Cebpb	3.80549	4.1772	FALSE	FALSE
NM_011240	225	617	19386	Ranbp2	2.95085	3.38315	FALSE	FALSE
NM_175090	959	859	20529	Slc31a1	3.58048	3.52686	FALSE	FALSE
NM_026556	101	137	68097	Dynll2	2.60299	2.72959	FALSE	FALSE
NM_145930	31	77	106064	AW549877	2.09003	2.47936	FALSE	FALSE
NM_009663	1640	1751	11690	Alox5ap	3.81351	3.83615	FALSE	FALSE
NM_019653	585	1430	78889	Wsb1	3.36582	3.7482	FALSE	FALSE
NM_028411	17	12	72982	Tmem138	1.82911	1.67205	FALSE	FALSE
NM_001033379	8	12	319618	Dcp1b	1.50176	1.67205	FALSE	FALSE
NM_016722	247	410	50917	Galns	2.99136	3.20565	FALSE	FALSE
NM_028341	16	41	72747	Ttc39c	1.80279	2.20565	FALSE	FALSE
NM_001163687	70	117	67111	Naaa	2.44376	2.66105	FALSE	FALSE
NM_011617	4	14	21948	Cd70	1.20073	1.73899	FALSE	FALSE
NM_027353	133	132	70233	Cd2bp2	2.72252	2.71344	FALSE	FALSE
NM_015749	377	527	21452	Tcn2	3.17501	3.31468	FALSE	FALSE
NM_080848	202	228	140858	Wdr5	2.90402	2.9508	FALSE	FALSE
NM_172381	91	116	230249	AI314180	2.55771	2.65732	FALSE	FALSE
NM_001198977	539	664	20963	Syk	3.33025	3.41503	FALSE	FALSE
NM_007621	177	94	12409	Cbr2	2.84664	2.56599	FALSE	FALSE
NM_001014390	30	125	69181	Dyrk2	2.07579	2.68977	FALSE	FALSE
NM_001166630_dup1	488	467	NA	NA	3.28709	3.26218	FALSE	FALSE
NM_011499	406	931	20901	Strap	3.20719	3.56181	FALSE	FALSE
NM_010500	511	1488	15939	Ier5	3.30709	3.76547	FALSE	FALSE
NM_153137	13	6	215243	Traf3ip3	1.71261	1.37102	FALSE	FALSE
NM_199056	30	28	75678	Ippk	2.07579	2.04002	FALSE	FALSE
NM_001163441	46	55	17454	Mov10	2.26142	2.33323	FALSE	FALSE
NM_001136054	84	105	11907	Ate1	2.52295	2.61405	FALSE	FALSE
NM_001110832	290	571	18044	Nfya	3.06106	3.3495	FALSE	FALSE
NM_145619	71	83	235587	Parp3	2.44992	2.51194	FALSE	FALSE
NM_011662	2023	2949	22177	Tyrobp	3.90466	4.06254	FALSE	FALSE
NM_145149	26	50	233046	Rasgrp4	2.01364	2.29183	FALSE	FALSE
NM_001166635	42	37	68041	Mid1ip1	2.22192	2.16107	FALSE	FALSE
NM_175025	49	131	235574	Atp2c1	2.28886	2.71014	FALSE	FALSE
NM_181066	29	12	231841	Brat1	2.06106	1.67205	FALSE	FALSE
NM_011424	34	42	20602	Ncor2	2.13014	2.21611	FALSE	FALSE
NM_153142	99	105	103710	Slc35e4	2.5943	2.61405	FALSE	FALSE
NM_145985	476	895	213827	Arcn1	3.27627	3.54469	FALSE	FALSE
NM_172590	82	122	218460	Wdr41	2.51248	2.67922	FALSE	FALSE
NM_001164422	113	384	66943	Pqlc1	2.65174	3.1772	FALSE	FALSE
NM_173430	14	21	243853	Fkrp	1.74479	1.91508	FALSE	FALSE
NM_001099349_dup5	74	57	NA	NA	2.4679	2.34874	FALSE	FALSE
NM_027472	24	19	70591	5730455P16Rik	1.97888	1.87162	FALSE	FALSE
NM_001253872	406	329	16408	Itgal	3.20719	3.11006	FALSE	FALSE
NM_026444	819	614	12974	Cs	3.51195	3.38103	FALSE	FALSE
NM_011187	1158	1194	19177	Psmb7	3.66237	3.66987	FALSE	FALSE
NM_178729	47	127	242960	Fbxl5	2.27076	2.69667	FALSE	FALSE
NM_013651	241	269	20222	Sf3a2	2.98068	3.02262	FALSE	FALSE
NM_028864	219	415	78781	Zc3hav1	2.93911	3.21091	FALSE	FALSE
NM_144528	64	102	70294	Rnf126	2.40485	2.60147	FALSE	FALSE
NM_172785	59	47	237256	Zc3h12d	2.36952	2.26496	FALSE	FALSE
NM_013549	6195	8526	15267	Hist2h2aa1	4.39071	4.52361	FALSE	FALSE
NM_030700	64	59	80884	Maged2	2.40485	2.36372	FALSE	FALSE
NM_001081183	90	126	66185	1110037F02Rik	2.55291	2.69324	FALSE	FALSE
NM_001033270	451	1099	218756	Slc4a7	3.25284	3.63386	FALSE	FALSE
NM_175285	18	41	96957	Tmem62	1.85394	2.20565	FALSE	FALSE
NM_022314	3123	4376	59069	Tpm3	4.09324	4.23394	FALSE	FALSE
NM_016858	35	27	19338	Rab33b	2.14273	2.02423	FALSE	FALSE
NM_178794	6	33	22184	Zrsr2	1.37682	2.11138	FALSE	FALSE
NM_001113392	3	17	12503	Cd247	1.07579	1.82331	FALSE	FALSE
NM_172730	51	148	232236	Ccdc174	2.30624	2.76313	FALSE	FALSE
NM_027498	82	204	70661	Sik3	2.51248	2.9025	FALSE	FALSE
NM_001253898	29	10	26940	Ecsit	2.06106	1.59286	FALSE	FALSE
NM_001081406	18	11	69706	Lrr1	1.85394	1.63426	FALSE	FALSE
NM_153582	13	16	97487	Cmtm4	1.71261	1.79698	FALSE	FALSE
NM_029975	166	220	77777	Ulbp1	2.81877	2.93529	FALSE	FALSE
NM_021412	112	196	58223	Mmp19	2.64788	2.88512	FALSE	FALSE
NM_133746	21	25	72691	Calhm2	1.92089	1.9908	FALSE	FALSE
NM_175560	27	87	269997	Zfp747	2.03003	2.53238	FALSE	FALSE
NM_001164062	168	503	20850	Stat5a	2.82398	3.29443	FALSE	FALSE
NM_008839	26	125	18706	Pik3ca	2.01364	2.68977	FALSE	FALSE
NM_025504	20	21	66349	Atp5sl	1.8997	1.91508	FALSE	FALSE
NM_001013755	14	13	230757	5730409E04Rik	1.74479	1.70681	FALSE	FALSE
NM_001243239	12	15	381356	Cacfd1	1.67785	1.76896	FALSE	FALSE
NM_001080773	111	147	18607	Pdpk1	2.64399	2.76018	FALSE	FALSE
NM_177184	28	47	320528	Vps13c	2.04582	2.26496	FALSE	FALSE
NM_030609	1449	3029	80838	Hist1h1a	3.75973	4.07416	FALSE	FALSE
NM_029760	24	42	76826	Nubpl	1.97888	2.21611	FALSE	FALSE
NM_001081288	17	23	319944	Taf2	1.82911	1.95459	FALSE	FALSE
NM_030241	86	155	67956	Setd8	2.53316	2.7832	FALSE	FALSE
NM_001253807	3258	4472	22631	Ywhaz	4.11162	4.24337	FALSE	FALSE
NM_009212	13	11	20589	Ighmbp2	1.71261	1.63426	FALSE	FALSE
NM_177940	32	17	107522	Ece2	2.10382	1.82331	FALSE	FALSE
NM_026031	388	430	67205	Utp11l	3.1875	3.22633	FALSE	FALSE
NM_001123038	377	582	13682	Eif4a2	3.17501	3.35779	FALSE	FALSE
NM_008884	105	94	18854	Pml	2.61986	2.56599	FALSE	FALSE
NM_001082960	3536	3851	16409	Itgam	4.14718	4.17844	FALSE	FALSE
NM_172819	32	58	239667	Dip2b	2.10382	2.35629	FALSE	FALSE
NM_009911	183	770	12767	Cxcr4	2.86112	3.47936	FALSE	FALSE
NM_133957	113	432	54446	Nfat5	2.65174	3.22835	FALSE	FALSE
NM_172121	38	45	223642	Zc3h3	2.17845	2.24608	FALSE	FALSE
NM_027133	79	119	69605	Lnp	2.49629	2.66841	FALSE	FALSE
NM_001177407_dup3	57	53	NA	NA	2.35454	2.31714	FALSE	FALSE
NM_001100415	70	54	627914	Gm14430	2.44376	2.32526	FALSE	FALSE
NM_009076	1681	2633	269261	Rpl12	3.82423	4.01332	FALSE	FALSE
[truncated: 10,954 more rows]

## Sheet: analyze-runoff-data-dotflaA.csv
	dotflaA.untr	dotflaA.harr	EG	Symbol	untrNormLog10	harrNormLog10	isCytokine-related	isHousekeeping
NM_007652	61	20	12509	Cd59a	2.07469	1.30103	FALSE	FALSE
NM_020567	209	134	57441	Gmnn	2.6095	2.1271	FALSE	FALSE
NM_001159617	24	47	56176	Pigp	1.66957	1.6721	FALSE	FALSE
NM_001037812	85	34	381259	Tmem237	2.21877	1.53148	FALSE	FALSE
NM_144838	12	9	218544	Sgtb	1.36854	1	FALSE	FALSE
NM_001042760	11	8	18400	Slc22a18	1.33075	1	FALSE	FALSE
NM_022882	74	50	64898	Lpin2	2.15859	1.69897	FALSE	FALSE
NM_001198823	2871	1781	11820	App	3.74739	3.25066	FALSE	FALSE
NM_001163432	39	62	12748	Clk2	1.88042	1.79239	FALSE	FALSE
NM_001080968	141	90	99412	Golga2	2.43857	1.95424	FALSE	FALSE
NM_153063	32	31	224691	Zfp472	1.79451	1.49136	FALSE	FALSE
NM_019798	10	14	18577	Pde4a	1.28936	1.14613	FALSE	FALSE
NM_011509	136	36	100041294	Gm3258	2.42289	1.5563	FALSE	FALSE
NM_001001981	24	15	195434	Utp14b	1.66957	1.17609	FALSE	FALSE
NM_145222	22	4	227327	B3gnt7	1.63178	1	FALSE	FALSE
NM_001040111	197	89	69710	Arap1	2.58382	1.94939	FALSE	FALSE
NM_133186	110	56	68428	Steap3	2.33075	1.74819	FALSE	FALSE
NM_010234	1249	842	14281	Fos	3.38592	2.92531	FALSE	FALSE
NM_172541	141	173	215210	Tmem120a	2.43857	2.23805	FALSE	FALSE
NM_024448	111	101	19328	Rab12	2.33468	2.00432	FALSE	FALSE
NM_021366	89	52	50794	Klf13	2.23875	1.716	FALSE	FALSE
NM_001136070	27	9	16865	Eif2d	1.72072	1	FALSE	FALSE
NM_019703	411	189	56421	Pfkp	2.9032	2.27646	FALSE	FALSE
NM_026217	178	33	67526	Atg12	2.53978	1.51851	FALSE	FALSE
NM_001029842	57	51	104681	Slc16a6	2.04523	1.70757	FALSE	FALSE
NM_001168297	33	32	71865	Fbxo30	1.80787	1.50515	FALSE	FALSE
NM_001040397	15	118	78749	Filip1l	1.46545	2.07188	FALSE	FALSE
NM_007421	580	251	11565	Adssl1	3.05278	2.39967	FALSE	FALSE
NM_173748	119	87	209586	Nudcd3	2.3649	1.93952	FALSE	FALSE
NM_201393	783	512	18810	Plec	3.18312	2.70927	FALSE	FALSE
NM_008402	1142	1163	16410	Itgav	3.34702	3.06558	FALSE	FALSE
NM_033596	2395	982	97122	Hist2h4	3.66866	2.99211	FALSE	FALSE
NM_001008542	114	51	17859	Mxi1	2.34626	1.70757	FALSE	FALSE
NM_011291	5243	1815	19989	Rpl7	4.00894	3.25888	FALSE	FALSE
NM_001033962	179	86	22215	Ube3a	2.54221	1.9345	FALSE	FALSE
NM_011400	1938	614	20525	Slc2a1	3.57671	2.78817	FALSE	FALSE
NM_027203	71	30	69757	Leng1	2.14061	1.47712	FALSE	FALSE
NM_001166457	224	98	210766	Brcc3	2.6396	1.99123	FALSE	FALSE
NM_001161845	211	105	20393	Sgk1	2.61364	2.02119	FALSE	FALSE
NM_007807	5439	1944	13058	Cybb	4.02487	3.2887	FALSE	FALSE
NM_001170537	350	157	17260	Mef2c	2.83342	2.1959	FALSE	FALSE
NM_001163487	26	8	18642	Pfkm	1.70433	1	FALSE	FALSE
NM_001083334	496	378	30948	Bin1	2.98484	2.57749	FALSE	FALSE
NM_001205082	140	115	20778	Scarb1	2.43548	2.0607	FALSE	FALSE
NM_001025594	31	16	71834	Zbtb43	1.78072	1.20412	FALSE	FALSE
NM_025951	23	16	67073	Pi4k2b	1.65108	1.20412	FALSE	FALSE
NM_008385	29	22	16330	Inpp5b	1.75175	1.34242	FALSE	FALSE
NM_001081013	26	22	109263	Rlf	1.70433	1.34242	FALSE	FALSE
NM_029447	112	76	75805	Nln	2.33857	1.88081	FALSE	FALSE
NM_026626	11	3	68226	Efcab2	1.33075	1	FALSE	FALSE
NM_001256132	143	67	93790	Nipa2	2.44469	1.82607	FALSE	FALSE
NM_009001	12	13	19339	Rab3a	1.36854	1.11394	FALSE	FALSE
NM_028523	40	45	73379	Dcbld2	1.89142	1.65321	FALSE	FALSE
NM_026176	301	107	67466	Pdcl	2.76792	2.02938	FALSE	FALSE
NM_025555	34	12	66421	2410004B18Rik	1.82083	1.07918	FALSE	FALSE
NM_016874	3	11	54006	Deaf1	1	1.04139	FALSE	FALSE
NM_010119	2253	1106	13660	Ehd1	3.64212	3.04376	FALSE	FALSE
NM_001083958	17	8	72611	Zfp655	1.5198	1	FALSE	FALSE
NM_001141977	332	200	72119	Tpx2	2.81049	2.30103	FALSE	FALSE
NM_172606	306	122	223455	2016-03-06	2.77508	2.08636	FALSE	FALSE
NM_026042	268	138	67224	Med29	2.71749	2.13988	FALSE	FALSE
NM_019567	158	159	56215	Acin1	2.48801	2.2014	FALSE	FALSE
NM_009777	8443	4409	12260	C1qb	4.21585	3.64434	FALSE	FALSE
NM_031868	1148	755	19045	Ppp1ca	3.3493	2.87795	FALSE	FALSE
NM_007573	757	266	12261	C1qbp	3.16845	2.42488	FALSE	FALSE
NM_001033449	81	32	381259	Tmem237	2.19784	1.50515	FALSE	FALSE
NM_177568	18	19	18796	Plcb2	1.54463	1.27875	FALSE	FALSE
NM_053187	127	100	94221	Gopc	2.39316	2	FALSE	FALSE
NM_001034097	53	75	619441	Tnfsf12Tnfsf13	2.01363	1.87506	FALSE	FALSE
NM_025520	86	44	66373	Lsm5	2.22385	1.64345	FALSE	FALSE
NM_175306	33	46	100169	Phactr4	1.80787	1.66276	FALSE	FALSE
NM_001171035	4283	1279	110213	Tmbim6	3.9211	3.10687	FALSE	FALSE
NM_199476	39	25	382985	Rrm2b	1.88042	1.39794	FALSE	FALSE
NM_172259	216	46	216459	Myl6b	2.62381	1.66276	FALSE	FALSE
NM_134033	60	39	104479	Ccdc117	2.06751	1.59106	FALSE	FALSE
NM_001122596	103	37	213438	A630033H20Rik	2.30219	1.5682	FALSE	FALSE
NM_172989	17	13	14745	Lpar1	1.5198	1.11394	FALSE	FALSE
NM_028835	118	65	74244	Atg7	2.36124	1.81291	FALSE	FALSE
NM_001113354	74	35	320595	Phf8	2.15859	1.54407	FALSE	FALSE
NM_013859	34	32	29805	Znhit2	1.82083	1.50515	FALSE	FALSE
NM_139311	12	10	246198	Mllt6	1.36854	1	FALSE	FALSE
NM_153544	24	13	217216	BC030867	1.66957	1.11394	FALSE	FALSE
NM_172145	15	7	230752	Eva1b	1.46545	1	FALSE	FALSE
NM_025836	379	205	66905	Plin3	2.86799	2.31175	FALSE	FALSE
NM_007999	319	154	14156	Fen1	2.79315	2.18752	FALSE	FALSE
NM_001145821	222	74	14594	Ggta1	2.63571	1.86923	FALSE	FALSE
NM_001253702	57	49	229681	St7l	2.04523	1.6902	FALSE	FALSE
NM_138749	233	91	140570	Plxnb2	2.65671	1.95904	FALSE	FALSE
NM_001172104	11	12	109929	Zbtb25	1.33075	1.07918	FALSE	FALSE
NM_139197	54	12	227671	Gbgt1	2.02175	1.07918	FALSE	FALSE
NM_080554	246	121	66998	Psmd5	2.68029	2.08279	FALSE	FALSE
NM_145529	100	59	228410	Cstf3	2.28936	1.77085	FALSE	FALSE
NM_030690	87	44	75646	Rai14	2.22887	1.64345	FALSE	FALSE
NM_133667	21	14	18604	Pdk2	1.61157	1.14613	FALSE	FALSE
NM_009395	126	119	21927	Tnfaip1	2.38973	2.07555	FALSE	FALSE
NM_177472	18	10	52864	Slx4	1.54463	1	FALSE	FALSE
NM_026378	22	8	67789	Dalrd3	1.63178	1	FALSE	FALSE
NM_018825	45	26	23921	Sh2b2	1.94257	1.41497	FALSE	FALSE
NM_033444	6337	2546	114584	Clic1	4.09124	3.40586	FALSE	FALSE
NM_025339	11	16	66079	Tmem42	1.33075	1.20412	FALSE	FALSE
NM_001042513	761	509	50493	Txnrd1	3.17074	2.70672	FALSE	FALSE
NM_175445	285	150	215653	Rassf2	2.7442	2.17609	FALSE	FALSE
NM_028840	133	62	74252	Armc1	2.41321	1.79239	FALSE	FALSE
NM_008583	38	45	17283	Men1	1.86914	1.65321	FALSE	FALSE
NM_021887	145	81	60504	Il21r	2.45072	1.90849	FALSE	FALSE
NM_029645	49	18	384281	Gatc	1.97955	1.25527	FALSE	FALSE
NM_019772	588	188	56372	1110004F10Rik	3.05873	2.27416	FALSE	FALSE
NM_011523	33	42	20975	Synj2	1.80787	1.62325	FALSE	FALSE
NM_178279	122	173	218699	Pxk	2.37572	2.23805	FALSE	FALSE
NM_001142697	46	62	66648	Tpgs2	1.95211	1.79239	FALSE	FALSE
NM_133850	122	70	99311	Commd7	2.37572	1.8451	FALSE	FALSE
NM_023117	58	69	12531	Cdc25b	2.05278	1.83885	FALSE	FALSE
NM_010911	65	63	18041	Nfs1	2.10227	1.79934	FALSE	FALSE
NM_198831	189	116	52443	Mrpl48	2.56582	2.06446	FALSE	FALSE
NM_001033711	1349	561	14017	Evi2a	3.41937	2.74896	FALSE	FALSE
NM_001164190	163	58	17772	Mtm1	2.50154	1.76343	FALSE	FALSE
NM_027975	40	15	71878	Fam83d	1.89142	1.17609	FALSE	FALSE
NM_001013379	59	64	234358	Zfp930	2.06021	1.80618	FALSE	FALSE
NM_001004142	44	25	195046	Nlrp1a	1.93281	1.39794	FALSE	FALSE
NM_007681	97	101	12615	Cenpa	2.27613	2.00432	FALSE	FALSE
NM_001166431	1701	1063	98758	Hnrnpf	3.52006	3.02653	FALSE	FALSE
NM_001039137	197	123	56367	Scoc	2.58382	2.08991	FALSE	FALSE
NM_080446	77	37	117599	Helb	2.17585	1.5682	FALSE	FALSE
NM_028754	95	49	74098	0610037L13Rik	2.26708	1.6902	FALSE	FALSE
NM_007861	569	219	13382	Dld	3.04447	2.34044	FALSE	FALSE
NM_027900	21	25	71750	R3hdm2	1.61157	1.39794	FALSE	FALSE
NM_024273	46	41	76916	Timmdc1	1.95211	1.61278	FALSE	FALSE
NM_201357	125	47	380752	Tssc1	2.38627	1.6721	FALSE	FALSE
NM_133825	153	79	52392	D1Ertd622e	2.47405	1.89763	FALSE	FALSE
NM_201407	109	71	229541	Dennd4b	2.32678	1.85126	FALSE	FALSE
NM_025281	82	77	17089	Lyar	2.20317	1.88649	FALSE	FALSE
NM_177601	31	14	212090	Tmem60	1.78072	1.14613	FALSE	FALSE
NM_130882	51	16	170716	Cyp4f13	1.99693	1.20412	FALSE	FALSE
NM_001146086	19	46	78938	Fbxo34	1.56811	1.66276	FALSE	FALSE
NM_021335	709	235	20639	Snrpb2	3.14	2.37107	FALSE	FALSE
NM_023773	76	48	75339	Mphosph8	2.17017	1.68124	FALSE	FALSE
NM_134042	49	23	104776	Aldh6a1	1.97955	1.36173	FALSE	FALSE
NM_001110809	61	20	66614	Gpatch4	2.07469	1.30103	FALSE	FALSE
NM_007788	471	423	12995	Csnk2a1	2.96238	2.62634	FALSE	FALSE
NM_178891	49	10	99890	Prmt6	1.97955	1	FALSE	FALSE
NM_172620	150	51	224705	Vps52	2.46545	1.70757	FALSE	FALSE
NM_021524	669	378	59027	Nampt	3.11478	2.57749	FALSE	FALSE
NM_183138	14	13	194388	Tet3	1.43548	1.11394	FALSE	FALSE
NM_011822	18	38	14755	Pigq	1.54463	1.57978	FALSE	FALSE
NM_001110272	3	15	68644	Abhd14a	1	1.17609	FALSE	FALSE
NM_027395	385	144	70350	Basp1	2.87482	2.15836	FALSE	FALSE
NM_020035	12	5	56703	Pigo	1.36854	1	FALSE	FALSE
NM_009830	184	114	12448	Ccne2	2.55417	2.0569	FALSE	FALSE
NM_019501	45	22	56075	Pdss1	1.94257	1.34242	FALSE	FALSE
NM_028233	106	62	72416	Lrpprc	2.31466	1.79239	FALSE	FALSE
NM_001040403	88	126	14252	Flot2	2.23384	2.10037	FALSE	FALSE
NM_001159525	216	71	19298	Pex19	2.62381	1.85126	FALSE	FALSE
NM_148922	12	23	17245	Mdm1	1.36854	1.36173	FALSE	FALSE
NM_007928	92	49	13728	Mark2	2.25314	1.6902	FALSE	FALSE
NM_001033463	13	38	381801	Tatdn2	1.4033	1.57978	FALSE	FALSE
NM_177582	21	26	208104	Mlxip	1.61157	1.41497	FALSE	FALSE
NM_010807	1032	523	17357	Marcksl1	3.30303	2.7185	FALSE	FALSE
NM_013770	258	124	27376	Slc25a10	2.70097	2.09342	FALSE	FALSE
NM_028963	14	2	74477	4933427D14Rik	1.43548	1	FALSE	FALSE
NM_010546	119	69	16150	Ikbkb	2.3649	1.83885	FALSE	FALSE
NM_199018	42	34	236920	Stard8	1.9126	1.53148	FALSE	FALSE
NM_001033157	42	61	236366	5730507C01Rik	1.9126	1.78533	FALSE	FALSE
NM_001122978	17	10	26885	Casp8ap2	1.5198	1	FALSE	FALSE
NM_146238	24	14	237221	Gemin8	1.66957	1.14613	FALSE	FALSE
NM_007713	53	50	102414	Clk3	2.01363	1.69897	FALSE	FALSE
NM_025388	326	80	66155	Ufc1	2.80257	1.90309	FALSE	FALSE
NM_001039959	164	91	66395	Ahnak	2.5042	1.95904	FALSE	FALSE
NM_001253690	13	11	56218	Patz1	1.4033	1.04139	FALSE	FALSE
NM_001165997	27	13	76857	Spopl	1.72072	1.11394	FALSE	FALSE
NM_001142921	82	66	21416	Tcf7l2	2.20317	1.81954	FALSE	FALSE
NM_001167991	7	12	170833	Hook2	1.13445	1.07918	FALSE	FALSE
NM_018793	43	17	54721	Tyk2	1.92282	1.23045	FALSE	FALSE
NM_026675	53	22	68323	Nudt22	2.01363	1.34242	FALSE	FALSE
NM_001100109	1265	747	665155	Srp54b	3.39145	2.87332	FALSE	FALSE
NM_001162989	222	67	56698	Phax	2.63571	1.82607	FALSE	FALSE
NM_029573	489	215	67834	Idh3a	2.97866	2.33244	FALSE	FALSE
NM_026125	35	22	67389	Fam132a	1.83342	1.34242	FALSE	FALSE
NM_029814	596	196	76959	Chmp5	3.0646	2.29226	FALSE	FALSE
NM_026392	167	126	70397	Tmem70	2.51207	2.10037	FALSE	FALSE
NM_001190302	132	40	665211	Gm14326	2.40993	1.60206	FALSE	FALSE
NM_023526	27	16	69721	Nkiras1	1.72072	1.20412	FALSE	FALSE
NM_020493	29	22	20807	Srf	1.75175	1.34242	FALSE	FALSE
NM_025313	921	369	66043	Atp5d	3.25361	2.56703	FALSE	FALSE
NM_001243040	415	297	100042856	Gm4070	2.9074	2.47276	FALSE	FALSE
NM_011897	27	49	24064	Spry2	1.72072	1.6902	FALSE	FALSE
NM_025443	478	169	66249	Pno1	2.96878	2.22789	FALSE	FALSE
NM_026091	62	35	67326	1700037H04Rik	2.08175	1.54407	FALSE	FALSE
NM_009845	11	5	12483	Cd22	1.33075	1	FALSE	FALSE
NM_001252491	32	59	64291	Osbpl1a	1.79451	1.77085	FALSE	FALSE
NM_001145960	1372	681	56857	Slc37a2	3.42671	2.83315	FALSE	FALSE
NM_001252200	54	87	26921	Map4k4	2.02175	1.93952	FALSE	FALSE
NM_178925	35	8	106338	Nsun3	1.83342	1	FALSE	FALSE
NM_007502	1854	871	11933	Atp1b3	3.55746	2.94002	FALSE	FALSE
NM_008194	539	138	14933	Gyk	3.02094	2.13988	FALSE	FALSE
NM_026518	58	20	68031	Rnf146	2.05278	1.30103	FALSE	FALSE
NM_145976	141	47	212937	Tifab	2.43857	1.6721	FALSE	FALSE
NM_011956	334	124	26426	Nubp2	2.8131	2.09342	FALSE	FALSE
NM_019695	6	14	56513	Pard6a	1.06751	1.14613	FALSE	FALSE
NM_008723	157	68	18150	Npm3	2.48525	1.83251	FALSE	FALSE
NM_001252550	143	81	217370	BC017643	2.44469	1.90849	FALSE	FALSE
NM_012012	15	6	26909	Exo1	1.46545	1	FALSE	FALSE
NM_001163555	181	98	18987	Pou2f2	2.54703	1.99123	FALSE	FALSE
NM_025872	96	80	66964	Golt1b	2.27163	1.90309	FALSE	FALSE
NM_020589	17	11	68910	Zfp467	1.5198	1.04139	FALSE	FALSE
NM_173388	1017	538	215113	Slc43a2	3.29668	2.73078	FALSE	FALSE
NM_183031	367	252	321019	Gpr183	2.85402	2.4014	FALSE	FALSE
NM_001013832	87	22	436440	Gpr31b	2.22887	1.34242	FALSE	FALSE
NM_172578	62	51	217653	Mis18bp1	2.08175	1.70757	FALSE	FALSE
NM_001164406	248	109	24068	Sra1	2.68381	2.03743	FALSE	FALSE
NM_172260	21	9	216543	Cep68	1.61157	1	FALSE	FALSE
NM_026187	34	10	52231	Ankzf1	1.82083	1	FALSE	FALSE
NM_001252587	145	68	228880	Zmynd8	2.45072	1.83251	FALSE	FALSE
NM_026877	83	68	68938	Aspscr1	2.20843	1.83251	FALSE	FALSE
NM_007700	43	110	12675	Chuk	1.92282	2.04139	FALSE	FALSE
NM_009351	90	35	21745	Tep1	2.2436	1.54407	FALSE	FALSE
NM_207636	162	113	319448	Fndc3a	2.49887	2.05308	FALSE	FALSE
NM_025375	195	81	66138	Wbscr22	2.57939	1.90849	FALSE	FALSE
NM_178701	78	52	231549	Lrrc8d	2.18145	1.716	FALSE	FALSE
NM_001165984	438	253	74383	Ubap2l	2.93083	2.40312	FALSE	FALSE
NM_013860	56	28	29806	Limd1	2.03754	1.44716	FALSE	FALSE
NM_001166668	14	9	269400	Rtel1	1.43548	1	FALSE	FALSE
NM_001037940	584	435	23950	Dnajb6	3.05577	2.63849	FALSE	FALSE
NM_001145902	454	162	228359	Arhgap1	2.94641	2.20952	FALSE	FALSE
NM_026662	206	73	110639	Prps2	2.60322	1.86332	FALSE	FALSE
NM_001100116	276	151	100101807	1700047I17Rik2	2.73026	2.17898	FALSE	FALSE
NM_001130458	455	321	21452	Tcn2	2.94737	2.50651	FALSE	FALSE
NM_198109	7	14	231637	Ssh1	1.13445	1.14613	FALSE	FALSE
NM_009157	99	128	26398	Map2k4	2.28499	2.10721	FALSE	FALSE
NM_001162996	128	46	72205	Eml2	2.39657	1.66276	FALSE	FALSE
NM_019637	26	21	56291	Styx	1.70433	1.32222	FALSE	FALSE
NM_173443	78	38	70675	Vcpip1	2.18145	1.57978	FALSE	FALSE
NM_001160415	387	194	80287	Apobec3	2.87707	2.2878	FALSE	FALSE
NM_145510	66	20	98710	Rabif	2.1089	1.30103	FALSE	FALSE
NM_025591	84	61	66488	Fam136a	2.21363	1.78533	FALSE	FALSE
NM_029861	35	11	380686	Cnrip1	1.83342	1.04139	FALSE	FALSE
NM_016706	21	17	12812	Coil	1.61157	1.23045	FALSE	FALSE
NM_029278	133	86	75416	Nop14	2.41321	1.9345	FALSE	FALSE
NM_010155	36	59	13875	Erf	1.84566	1.77085	FALSE	FALSE
NM_025300	171	103	27395	Mrpl15	2.52235	2.01284	FALSE	FALSE
NM_175104	23	11	66306	Fam53c	1.65108	1.04139	FALSE	FALSE
NM_028369	18	5	72825	Mon1a	1.54463	1	FALSE	FALSE
NM_007483	385	269	11852	Rhob	2.87482	2.42975	FALSE	FALSE
NM_177111	11	14	320234	Ccdc66	1.33075	1.14613	FALSE	FALSE
NM_025968	371	110	67103	Ptgr1	2.85873	2.04139	FALSE	FALSE
NM_023243	242	152	66671	Ccnh	2.67317	2.18184	FALSE	FALSE
NM_177780	11	4	68813	Dock5	1.33075	1	FALSE	FALSE
NM_011884	130	105	24018	Rngtt	2.4033	2.02119	FALSE	FALSE
NM_025450	232	71	66258	Mrps17	2.65484	1.85126	FALSE	FALSE
NM_011233	75	29	19356	Rad17	2.16442	1.4624	FALSE	FALSE
NM_007609	267	142	12363	Casp4	2.71587	2.15229	FALSE	FALSE
NM_145943	132	65	208768	Sde2	2.40993	1.81291	FALSE	FALSE
NM_019682	889	201	56455	Dynll1	3.23826	2.3032	FALSE	FALSE
NM_008248	1013	326	15254	Hint1	3.29496	2.51322	FALSE	FALSE
NM_008730	190	163	18164	Nptx1	2.56811	2.21219	FALSE	FALSE
NM_001160378	81	74	212943	Fam46a	2.19784	1.86923	FALSE	FALSE
NM_010120	376	166	13664	Eif1a	2.86454	2.22011	FALSE	FALSE
NM_001167887	34	15	225888	Suv420h1	1.82083	1.17609	FALSE	FALSE
NM_001077359	111	84	26431	Git2	2.33468	1.92428	FALSE	FALSE
NM_001029994	50	35	76014	Zc3h18	1.98833	1.54407	FALSE	FALSE
NM_020022	116	69	19718	Rfc2	2.35381	1.83885	FALSE	FALSE
NM_013815	89	136	217578	Baz1a	2.23875	2.13354	FALSE	FALSE
NM_001205231	591	376	22185	U2af2	3.06094	2.57519	FALSE	FALSE
NM_022015	46	29	63856	Taf8	1.95211	1.4624	FALSE	FALSE
NM_027382	48	27	70315	Hdac8	1.9706	1.43136	FALSE	FALSE
NM_001005866	13	6	30841	Kdm2b	1.4033	1	FALSE	FALSE
NM_178693	54	26	227683	Coq4	2.02175	1.41497	FALSE	FALSE
NM_001163704	83	56	50762	Fbxo6	2.20843	1.74819	FALSE	FALSE
NM_016896	35	42	53859	Map3k14	1.83342	1.62325	FALSE	FALSE
NM_001081321	72	97	71521	Pds5a	2.14669	1.98677	FALSE	FALSE
NM_009939	507	192	12848	Cops2	2.99436	2.2833	FALSE	FALSE
NM_153795	1181	518	108101	Fermt3	3.36161	2.71433	FALSE	FALSE
NM_001177406_dup2	102	40	NA	NA	2.29796	1.60206	FALSE	FALSE
NM_001005509	301	142	229317	Eif2a	2.76792	2.15229	FALSE	FALSE
NM_027456	17	13	78795	Armc9	1.5198	1.11394	FALSE	FALSE
NM_001177752	293	220	170768	Pfkfb3	2.75622	2.34242	FALSE	FALSE
NM_001114085	241	115	67203	Nde1	2.67137	2.0607	FALSE	FALSE
NM_133780	129	206	108989	Tpr	2.39994	2.31387	FALSE	FALSE
NM_001005475	25	20	245666	Iqsec2	1.6873	1.30103	FALSE	FALSE
NM_053169	21	11	94092	Trim16	1.61157	1.04139	FALSE	FALSE
NM_001033298	5	12	228730	Kiz	1	1.07918	FALSE	FALSE
NM_133906	53	36	74570	Zkscan1	2.01363	1.5563	FALSE	FALSE
NM_009405	14	12	21953	Tnni2	1.43548	1.07918	FALSE	FALSE
NM_026958	443	143	380773	Slirp	2.93576	2.15534	FALSE	FALSE
NM_177429	16	14	237222	Ofd1	1.49348	1.14613	FALSE	FALSE
NM_008033	244	149	14272	Fnta	2.67675	2.17319	FALSE	FALSE
NM_010304	171	109	14676	Gna15	2.52235	2.03743	FALSE	FALSE
NM_146065	108	41	223922	Atf7	2.32278	1.61278	FALSE	FALSE
NM_021436	16	28	230157	Tmeff1	1.49348	1.44716	FALSE	FALSE
NM_001081152	40	19	244879	Npat	1.89142	1.27875	FALSE	FALSE
NM_019480	29	31	55960	Ebag9	1.75175	1.49136	FALSE	FALSE
NM_029788	99	74	76892	Rnft1	2.28499	1.86923	FALSE	FALSE
NM_027830	6	13	71567	Mcm9	1.06751	1.11394	FALSE	FALSE
NM_001256055	660	386	100042807	Eif3j2	3.1089	2.58659	FALSE	FALSE
NM_001162417	100	70	17876	Myef2	2.28936	1.8451	FALSE	FALSE
NM_027711	86	50	544963	Iqgap2	2.22385	1.69897	FALSE	FALSE
NM_001164352	25	13	58859	Efemp2	1.6873	1.11394	FALSE	FALSE
NM_027180	214	148	69710	Arap1	2.61977	2.17026	FALSE	FALSE
NM_016957	646	241	15331	Hmgn2	3.09959	2.38202	FALSE	FALSE
NM_001195338	54	20	100503572	Bbip1	2.02175	1.30103	FALSE	FALSE
NM_001038839	136	88	18439	P2rx7	2.42289	1.94448	FALSE	FALSE
NM_028185	29	20	72290	Lsm11	1.75175	1.30103	FALSE	FALSE
NM_008914	139	83	19056	Ppp3cb	2.43237	1.91908	FALSE	FALSE
NM_172691	29	16	230088	Fam214b	1.75175	1.20412	FALSE	FALSE
NM_025937	145	126	67050	Nkap	2.45072	2.10037	FALSE	FALSE
NM_023232	119	59	66593	Diablo	2.3649	1.77085	FALSE	FALSE
NM_001163102	24	17	193838	Eme2	1.66957	1.23045	FALSE	FALSE
NM_001025309	212	106	224938	Pja2	2.61569	2.02531	FALSE	FALSE
NM_009881	25	13	12593	Cdyl	1.6873	1.11394	FALSE	FALSE
NM_175092	11	14	23912	Rhof	1.33075	1.14613	FALSE	FALSE
NM_001195244	164	54	100503890	Pet100	2.5042	1.73239	FALSE	FALSE
NM_026554	233	82	68092	Ncbp2	2.65671	1.91381	FALSE	FALSE
NM_019651	19	18	56294	Ptpn9	1.56811	1.25527	FALSE	FALSE
NM_001166408	87	44	75646	Rai14	2.22887	1.64345	FALSE	FALSE
NM_001163388	58	42	68020	Apopt1	2.05278	1.62325	FALSE	FALSE
NM_013918	141	135	30940	Usp25	2.43857	2.13033	FALSE	FALSE
NM_001161816	15	4	433287	Gm15455	1.46545	1	FALSE	FALSE
NM_007858	373	312	13367	Diap1	2.86106	2.49415	FALSE	FALSE
NM_028343	308	231	72759	Tmem135	2.77791	2.36361	FALSE	FALSE
NM_172974	60	20	26895	Cops7b	2.06751	1.30103	FALSE	FALSE
NM_153049	82	60	223701	Mkl1	2.20317	1.77815	FALSE	FALSE
NM_025982	243	162	67125	Tspan31	2.67496	2.20952	FALSE	FALSE
NM_011615	74	44	21945	Dedd	2.15859	1.64345	FALSE	FALSE
NM_027351	105	19	70225	Ppil3	2.31054	1.27875	FALSE	FALSE
NM_001164569	18	18	67338	Rffl	1.54463	1.25527	FALSE	FALSE
NM_001100606	16	7	100113398	Adat3	1.49348	1	FALSE	FALSE
NM_001199271	26	16	20509	Slc19a1	1.70433	1.20412	FALSE	FALSE
NM_029418	27	15	75758	9130401M01Rik	1.72072	1.17609	FALSE	FALSE
NM_146168	45	55	232023	Vopp1	1.94257	1.74036	FALSE	FALSE
NM_001177543_dup2	141	57	NA	NA	2.43857	1.75587	FALSE	FALSE
NM_007964	24	19	14020	Evi5	1.66957	1.27875	FALSE	FALSE
NM_001166493	27	10	240168	Rasgrp3	1.72072	1	FALSE	FALSE
NM_001037863	55	47	320940	Atp11c	2.02972	1.6721	FALSE	FALSE
NM_175683	69	41	227525	Dclre1c	2.1282	1.61278	FALSE	FALSE
NM_053204	47	18	111173	Erc1	1.96145	1.25527	FALSE	FALSE
NM_019729	153	38	84092	Usp8	2.47405	1.57978	FALSE	FALSE
NM_007447	43	17	11727	Ang	1.92282	1.23045	FALSE	FALSE
NM_011660	3165	909	22166	Txn1	3.78973	2.95856	FALSE	FALSE
NM_001037746	199	119	328099	Prps1l3	2.58821	2.07555	FALSE	FALSE
NM_010788	48	27	17257	Mecp2	1.9706	1.43136	FALSE	FALSE
NM_001166637	12	2	100043224	Gm4301	1.36854	1	FALSE	FALSE
NM_025494	713	207	66335	Atp6v1c1	3.14244	2.31597	FALSE	FALSE
NM_001026212	184	73	56205	Ensa	2.55417	1.86332	FALSE	FALSE
NM_175027	13	9	237211	Fancb	1.4033	1	FALSE	FALSE
NM_010928	115	118	18129	Notch2	2.35005	2.07188	FALSE	FALSE
NM_001033988	665	249	27057	Ncoa4	3.11218	2.3962	FALSE	FALSE
NM_011426	339	205	20612	Siglec1	2.81955	2.31175	FALSE	FALSE
NM_172592	61	67	218543	Srek1	2.07469	1.82607	FALSE	FALSE
NM_001164420	106	56	66943	Pqlc1	2.31466	1.74819	FALSE	FALSE
NM_001076789	135	91	12419	Cbx5	2.41969	1.95904	FALSE	FALSE
NM_016755	943	363	11957	Atp5j	3.26387	2.55991	FALSE	FALSE
NM_001005523	84	80	208606	Rsrc2	2.21363	1.90309	FALSE	FALSE
NM_027470	13	9	70584	Pak4	1.4033	1	FALSE	FALSE
NM_008042	65	15	14294	Fpr3	2.10227	1.17609	FALSE	FALSE
NM_001253870	131	75	235043	Tmem205	2.40663	1.87506	FALSE	FALSE
NM_026446	274	122	56470	Rgs19	2.72711	2.08636	FALSE	FALSE
NM_011185	1790	533	19170	Psmb1	3.54221	2.72673	FALSE	FALSE
NM_194462	18	16	100986	Akap9	1.54463	1.20412	FALSE	FALSE
NM_013653	187	68	20304	Ccl5	2.5612	1.83251	FALSE	FALSE
NM_028866	130	56	74320	Wdr33	2.4033	1.74819	FALSE	FALSE
NM_001164689_dup1	131	55	NA	NA	2.40663	1.74036	FALSE	FALSE
NM_178363	46	38	56531	Ylpm1	1.95211	1.57978	FALSE	FALSE
NM_001142918	84	68	21416	Tcf7l2	2.21363	1.83251	FALSE	FALSE
NM_001195486	662	281	225027	Srsf7	3.11021	2.44871	FALSE	FALSE
NM_172116	92	33	213350	Pddc1	2.25314	1.51851	FALSE	FALSE
NM_023041	325	100	19298	Pex19	2.80124	2	FALSE	FALSE
NM_030702	83	56	80886	Senp3	2.20843	1.74819	FALSE	FALSE
NM_021465	195	144	20843	Stag2	2.57939	2.15836	FALSE	FALSE
NM_001081181	111	58	68115	9430016H08Rik	2.33468	1.76343	FALSE	FALSE
NM_026752	57	14	68520	Zfyve21	2.04523	1.14613	FALSE	FALSE
NM_009067	45	45	19765	Ralbp1	1.94257	1.65321	FALSE	FALSE
NM_019817	534	193	56447	Copz1	3.0169	2.28556	FALSE	FALSE
NM_001110351	97	75	20466	Sin3a	2.27613	1.87506	FALSE	FALSE
NM_175287	93	73	97159	A430005L14Rik	2.25784	1.86332	FALSE	FALSE
NM_013477	1064	562	11972	Atp6v0d1	3.3163	2.74974	FALSE	FALSE
NM_178796	141	67	328830	A530064D06Rik	2.43857	1.82607	FALSE	FALSE
NM_199146	172	86	209387	Trim30d	2.52488	1.9345	FALSE	FALSE
NM_153580	139	111	233875	Ino80e	2.43237	2.04532	FALSE	FALSE
NM_133744	66	29	72454	Ccdc71	2.1089	1.4624	FALSE	FALSE
NM_175562	14	3	270160	Rab39	1.43548	1	FALSE	FALSE
NM_001166589	4044	1416	276770	Eif5a	3.89617	3.15106	FALSE	FALSE
NM_139153	30	60	213990	Agap3	1.76648	1.77815	FALSE	FALSE
NM_177876	90	47	330192	Vps37b	2.2436	1.6721	FALSE	FALSE
NM_012049	141	74	27045	Nit1	2.43857	1.86923	FALSE	FALSE
NM_177186	19	14	320541	Slc35e2	1.56811	1.14613	FALSE	FALSE
NM_029762	34	28	76832	Hyls1	1.82083	1.44716	FALSE	FALSE
NM_001164604	139	50	68501	Nsmce2	2.43237	1.69897	FALSE	FALSE
NM_001044704	34	12	22697	Zscan21	1.82083	1.07918	FALSE	FALSE
NM_030243	100	83	71684	Rbm43	2.28936	1.91908	FALSE	FALSE
NM_027405	82	45	70373	Gpatch2l	2.20317	1.65321	FALSE	FALSE
NM_001253805	4256	1357	22631	Ywhaz	3.91836	3.13258	FALSE	FALSE
NM_011879	766	317	24010	Ik	3.17358	2.50106	FALSE	FALSE
NM_001110229	493	385	14007	Celf2	2.9822	2.58546	FALSE	FALSE
NM_009210	94	69	20585	Hltf	2.26248	1.83885	FALSE	FALSE
NM_026033	18	75	67210	Gatad1	1.54463	1.87506	FALSE	FALSE
NM_001252433	27	52	13383	Dlg1	1.72072	1.716	FALSE	FALSE
NM_008176	73	69	14825	Cxcl1	2.15268	1.83885	TRUE	FALSE
NM_008886	32	25	18861	Pms2	1.79451	1.39794	FALSE	FALSE
NM_001128198	51	26	230895	Vps13d	1.99693	1.41497	FALSE	FALSE
NM_001082962	25	11	20646	Snrpn	1.6873	1.04139	FALSE	FALSE
NM_031998	45	15	83922	Cep41	1.94257	1.17609	FALSE	FALSE
NM_198606	385	183	223499	Dcaf13	2.87482	2.26245	FALSE	FALSE
NM_001081215	65	34	234311	Ddx60	2.10227	1.53148	FALSE	FALSE
NM_001161456	166	96	12400	Cbfb	2.50946	1.98227	FALSE	FALSE
NM_021472	394	149	58809	Rnase4	2.88485	2.17319	FALSE	FALSE
NM_001177407_dup1	100	36	NA	NA	2.28936	1.5563	FALSE	FALSE
NM_178644	106	99	102644	Oaf	2.31466	1.99564	FALSE	FALSE
NM_172893	185	116	243771	Parp12	2.55653	2.06446	FALSE	FALSE
NM_198246	71	25	70120	Yars2	2.14061	1.39794	FALSE	FALSE
NM_019804	5	14	56375	B4galt4	1	1.14613	FALSE	FALSE
NM_175294	780	424	98415	Nucks1	3.18145	2.62737	FALSE	FALSE
NM_022323	12	8	64113	Moap1	1.36854	1	FALSE	FALSE
NM_026169	144	91	67457	Frmd8	2.44772	1.95904	FALSE	FALSE
NM_013464	12	9	11622	Ahr	1.36854	1	FALSE	FALSE
NM_177128	17	7	320299	Iqcb1	1.5198	1	FALSE	FALSE
NM_175423	243	333	109305	Orai1	2.67496	2.52244	FALSE	FALSE
NM_026899	528	327	68991	Ssu72	3.01199	2.51455	FALSE	FALSE
NM_001199187	69	42	69090	Ascc1	2.1282	1.62325	FALSE	FALSE
NM_029094	150	36	74769	Pik3cb	2.46545	1.5563	FALSE	FALSE
NM_030225	394	197	78920	Dlst	2.88485	2.29447	FALSE	FALSE
NM_029623	201	99	76482	3110002H16Rik	2.59255	1.99564	FALSE	FALSE
NM_001081471	48	8	668178	Mettl7a3	1.9706	1	FALSE	FALSE
NM_009272	337	261	20810	Srm	2.81699	2.41664	FALSE	FALSE
NM_026055	2050	513	67248	Rpl39	3.60111	2.71012	FALSE	FALSE
NM_008688	119	117	18029	Nfic	2.3649	2.06819	FALSE	FALSE
NM_001252455	25	19	19280	Ptprs	1.6873	1.27875	FALSE	FALSE
NM_001177402	55	20	68554	Cebpzos	2.02972	1.30103	FALSE	FALSE
NM_008828	10528	3784	18655	Pgk1	4.3117	3.57795	FALSE	FALSE
NM_001166596	4044	1416	276770	Eif5a	3.89617	3.15106	FALSE	FALSE
NM_139140	14	9	72572	Spats2	1.43548	1	FALSE	FALSE
NM_013749	38	16	27279	Tnfrsf12a	1.86914	1.20412	FALSE	FALSE
NM_025533	260	108	66394	Nosip	2.70433	2.03342	FALSE	FALSE
NM_009975	1313	421	13001	Csnk2b	3.40762	2.62428	FALSE	FALSE
NM_012056	23	32	27055	Fkbp9	1.65108	1.50515	FALSE	FALSE
NM_199469	200	182	217365	Nploc4	2.59039	2.26007	FALSE	FALSE
NM_001164671	952	698	15502	Dnaja1	3.26799	2.84386	FALSE	FALSE
NM_030250	110	110	52014	Nus1	2.33075	2.04139	FALSE	FALSE
NM_027412	98	11	70387	Ttc9c	2.28058	1.04139	FALSE	FALSE
NM_001253812	172	62	74195	Elp3	2.52488	1.79239	FALSE	FALSE
NM_013635	867	441	19027	Sypl	3.22737	2.64444	FALSE	FALSE
NM_026020	2239	717	67186	Rplp2	3.63941	2.85552	FALSE	FALSE
NM_008613	14	12	17427	Mns1	1.43548	1.07918	FALSE	FALSE
NM_017370	66	16	15439	Hp	2.1089	1.20412	FALSE	FALSE
NM_153557	7	11	227622	BC029214	1.13445	1.04139	FALSE	FALSE
NM_025829	30	28	66892	Eif4e3	1.76648	1.44716	FALSE	FALSE
NM_008143	5100	3111	14694	Gnb2l1	3.99693	3.4929	FALSE	FALSE
NM_175935	97	90	68401	G6pc3	2.27613	1.95424	FALSE	FALSE
NM_001253715	170	101	110265	Msra	2.5198	2.00432	FALSE	FALSE
NM_001171053	101	72	116871	Mta3	2.29368	1.85733	FALSE	FALSE
NM_181796	20	13	14869	Gstp2	1.59039	1.11394	FALSE	FALSE
NM_001172117	884	520	15162	Hck	3.23581	2.716	FALSE	FALSE
NM_133942	47	44	101476	Plekha1	1.96145	1.64345	FALSE	FALSE
NM_026914	372	151	69029	Smdt1	2.8599	2.17898	FALSE	FALSE
NM_001160019	645	341	208263	Tor1aip1	3.09891	2.53275	FALSE	FALSE
NM_001024922	200	73	234374	Ddx49	2.59039	1.86332	FALSE	FALSE
NM_026473	1254	678	67951	Tubb6	3.38765	2.83123	FALSE	FALSE
NM_133212	469	233	170744	Tlr8	2.96053	2.36736	FALSE	FALSE
NM_011192	514	382	19192	Psme3	3.00032	2.58206	FALSE	FALSE
NM_027881	76	24	71720	Osbpl3	2.17017	1.38021	FALSE	FALSE
NM_013640	572	220	19171	Psmb10	3.04675	2.34242	FALSE	FALSE
NM_144517	53	36	67249	Tbc1d19	2.01363	1.5563	FALSE	FALSE
NM_013558	36	52	15482	Hspa1l	1.84566	1.716	FALSE	FALSE
NM_019765	42	54	56430	Clip1	1.9126	1.73239	FALSE	FALSE
NM_001164200	376	311	18749	Prkacb	2.86454	2.49276	FALSE	FALSE
NM_001164118	4107	1693	20719	Serpinb6a	3.90288	3.22866	FALSE	FALSE
NM_001039201	99	35	76987	Hdhd2	2.28499	1.54407	FALSE	FALSE
NM_001081383	11	12	231051	Kmt2c	1.33075	1.07918	FALSE	FALSE
NM_025717	76	39	66704	Rbm4b	2.17017	1.59106	FALSE	FALSE
NM_144931	121	91	234664	Nae1	2.37214	1.95904	FALSE	FALSE
NM_010241	59	34	14339	Aktip	2.06021	1.53148	FALSE	FALSE
NM_011462	60	30	20729	Spin1	2.06751	1.47712	FALSE	FALSE
NM_178598	5823	1895	21346	Tagln2	4.0545	3.27761	FALSE	FALSE
NM_001081109	11	5	231876	Lmtk2	1.33075	1	FALSE	FALSE
NM_016791	76	78	18018	Nfatc1	2.17017	1.89209	FALSE	FALSE
NM_019710	177	97	24061	Smc1a	2.53733	1.98677	FALSE	FALSE
NM_028394	57	13	72938	Hspb11	2.04523	1.11394	FALSE	FALSE
NM_010447	3670	1053	15382	Hnrnpa1	3.85402	3.02243	FALSE	FALSE
NM_008327	17	11	26388	Ifi202b	1.5198	1.04139	FALSE	FALSE
NM_001081075	56	38	70567	Fra10ac1	2.03754	1.57978	FALSE	FALSE
NM_001004155	11	7	268759	9930012K11Rik	1.33075	1	FALSE	FALSE
NM_173021	11	6	18679	Phka1	1.33075	1	FALSE	FALSE
NM_001033337	31	8	239570	Ttc38	1.78072	1	FALSE	FALSE
NM_175654	9730	3854	319156	Hist1h4d	4.27747	3.58591	FALSE	FALSE
NM_126166	40	21	142980	Tlr3	1.89142	1.32222	FALSE	FALSE
NM_001040696	12	1	637515	Nlrp1b	1.36854	1	FALSE	FALSE
NM_001163641	67	24	84505	Setdb1	2.11543	1.38021	FALSE	FALSE
NM_008392	2590	743	16365	Irg1	3.70265	2.87099	FALSE	FALSE
NM_001081000	216	115	15547	Trmt2a	2.62381	2.0607	FALSE	FALSE
NM_001110131	54	69	71722	Cic	2.02175	1.83885	FALSE	FALSE
NM_029454	60	23	52023	Pibf1	2.06751	1.36173	FALSE	FALSE
NM_146124	467	159	228359	Arhgap1	2.95867	2.2014	FALSE	FALSE
NM_011790	39	20	23807	Arih2	1.88042	1.30103	FALSE	FALSE
NM_001177709	145	72	228998	Arfgap1	2.45072	1.85733	FALSE	FALSE
NM_001159604	103	63	80912	Pum1	2.30219	1.79934	FALSE	FALSE
NM_001270644	11	1	637578	Gm20765	1.33075	1	FALSE	FALSE
NM_012005	75	93	26896	Med14	2.16442	1.96848	FALSE	FALSE
NM_001253391	38	11	67472	Mtfr1	1.86914	1.04139	FALSE	FALSE
NM_010106	38333	15433	13627	Eef1a1	4.87293	4.18845	FALSE	FALSE
NM_001146161	327	189	18174	Slc11a2	2.8039	2.27646	FALSE	FALSE
NM_198026	41	24	230767	Iqcc	1.90214	1.38021	FALSE	FALSE
NM_021537	136	46	59041	Stk25	2.42289	1.66276	FALSE	FALSE
NM_011835	148	109	23924	Katna1	2.45962	2.03743	FALSE	FALSE
NM_001110265	50	45	22137	Ttk	1.98833	1.65321	FALSE	FALSE
NM_001159288	48	33	74522	Morc2a	1.9706	1.51851	FALSE	FALSE
NM_013684	103	42	21374	Tbp	2.30219	1.62325	FALSE	FALSE
NM_009823	22	37	12396	Cbfa2t2	1.63178	1.5682	FALSE	FALSE
NM_001199248	112	78	81601	Kat5	2.33857	1.89209	FALSE	FALSE
NM_019574	13	11	56218	Patz1	1.4033	1.04139	FALSE	FALSE
NM_009764	33	22	12189	Brca1	1.80787	1.34242	FALSE	FALSE
NM_001168536	22	15	71891	Cdadc1	1.63178	1.17609	FALSE	FALSE
NM_025898	702	257	108124	Napa	3.13569	2.40993	FALSE	FALSE
NM_008132	11	12	14659	Glrp1	1.33075	1.07918	FALSE	FALSE
NM_009193	328	152	20492	Slbp	2.80523	2.18184	FALSE	FALSE
NM_023320	139	87	67220	Plekho1	2.43237	1.93952	FALSE	FALSE
NM_053194	135	83	101489	Ric8	2.41969	1.91908	FALSE	FALSE
NM_013763	113	99	27368	Tbl2	2.34243	1.99564	FALSE	FALSE
NM_028956	90	43	74467	Pus10	2.2436	1.63347	FALSE	FALSE
NM_010559	130	137	16194	Il6ra	2.4033	2.13672	FALSE	FALSE
NM_001142411	36	35	245174	Zfp937	1.84566	1.54407	FALSE	FALSE
NM_133991	76	53	54632	Ftsj1	2.17017	1.72428	FALSE	FALSE
NM_134020	314	120	103694	Tmed4	2.78628	2.07918	FALSE	FALSE
NM_019927	161	166	23806	Arih1	2.49618	2.22011	FALSE	FALSE
NM_026402	306	219	67841	Atg3	2.77508	2.34044	FALSE	FALSE
NM_011840	35	28	23938	Map2k5	1.83342	1.44716	FALSE	FALSE
NM_028659	1056	355	73830	Eif3k	3.31302	2.55023	FALSE	FALSE
NM_013507	1404	1819	13690	Eif4g2	3.43672	3.25983	FALSE	FALSE
NM_145370	331	194	209318	Gps1	2.80918	2.2878	FALSE	FALSE
NM_177353	22	15	236727	Slc9a7	1.63178	1.17609	FALSE	FALSE
NM_001008425	197	94	386612	Thoc6	2.58382	1.97313	FALSE	FALSE
NM_001077687	16	9	80877	Lrba	1.49348	1	FALSE	FALSE
NM_026688	445	172	68349	Ndufs3	2.93772	2.23553	FALSE	FALSE
NM_001252288	277	177	18293	Ogdh	2.73183	2.24797	FALSE	FALSE
NM_138756	83	48	192287	Slc25a36	2.20843	1.68124	FALSE	FALSE
NM_028545	57	26	73458	1700055N04Rik	2.04523	1.41497	FALSE	FALSE
NM_029546	134	64	110816	Pwp2	2.41646	1.80618	FALSE	FALSE
NM_019992	2094	1098	56792	Stap1	3.61033	3.0406	FALSE	FALSE
NM_025326	237	102	66058	Tmem176a	2.6641	2.0086	FALSE	FALSE
NM_026828	27	15	52838	Dnlz	1.72072	1.17609	FALSE	FALSE
NM_001165935	30	35	74268	Aven	1.76648	1.54407	FALSE	FALSE
NM_001243053	222	70	12036	Bcat2	2.63571	1.8451	FALSE	FALSE
NM_139063	40	16	17828	Bloc1s5	1.89142	1.20412	FALSE	FALSE
NM_001163159	153	52	13026	Pcyt1a	2.47405	1.716	FALSE	FALSE
NM_025476	73	28	66302	Rmdn1	2.15268	1.44716	FALSE	FALSE
NM_029652	39	28	207952	Klhl25	1.88042	1.44716	FALSE	FALSE
NM_026613	39	65	68201	Ccdc34	1.88042	1.81291	FALSE	FALSE
NM_001164734	25	69	56524	Mpp6	1.6873	1.83885	FALSE	FALSE
NM_008187	76	46	14894	Cfap20	2.17017	1.66276	FALSE	FALSE
NM_145969	55	84	211922	Dennd6a	2.02972	1.92428	FALSE	FALSE
NM_011949	1071	659	26413	Mapk1	3.31914	2.81889	FALSE	FALSE
NM_009658	1086	444	11677	Akr1b3	3.32519	2.64738	FALSE	FALSE
NM_019668	460	200	22209	Ube2a	2.95211	2.30103	FALSE	FALSE
NM_023355	33	28	56322	Timm22	1.80787	1.44716	FALSE	FALSE
NM_026143	398	155	67420	Far1	2.88924	2.19033	FALSE	FALSE
NM_025542	662	303	66404	Rtfdc1	3.11021	2.48144	FALSE	FALSE
NM_001252543	418	149	27054	Sec23b	2.91053	2.17319	FALSE	FALSE
NM_001038664	66	10	14710	Gngt2	2.1089	1	FALSE	FALSE
NM_172769	234	145	235293	Sc5d	2.65857	2.16137	FALSE	FALSE
NM_027777	18	16	71382	Pex1	1.54463	1.20412	FALSE	FALSE
NM_146036	642	580	217737	Ahsa1	3.09689	2.76343	FALSE	FALSE
NM_001039511	24	9	117198	Ivns1abp	1.66957	1	FALSE	FALSE
NM_144791	446	262	208263	Tor1aip1	2.93869	2.4183	FALSE	FALSE
NM_001170869	93	24	78428	Wibg	2.25784	1.38021	FALSE	FALSE
NM_009089	174	107	20020	Polr2a	2.5299	2.02938	FALSE	FALSE
NM_010421	1924	2605	15211	Hexa	3.57356	3.41581	FALSE	FALSE
NM_013499	641	404	12946	Cr1l	3.09621	2.60638	FALSE	FALSE
NM_001080748	132	67	14886	Gtf2i	2.40993	1.82607	FALSE	FALSE
NM_024215	92	38	68040	Zfp593	2.25314	1.57978	FALSE	FALSE
NM_001013366	143	90	101240	Wdr91	2.44469	1.95424	FALSE	FALSE
NM_133887	568	235	100226	Stx12	3.0437	2.37107	FALSE	FALSE
NM_001001295	34	21	213550	Dis3l	1.82083	1.32222	FALSE	FALSE
NM_001025617	63	63	76025	Cant1	2.0887	1.79934	FALSE	FALSE
NM_001024526	385	374	207214	Larp4	2.87482	2.57287	FALSE	FALSE
NM_001200023	19	10	620419	Zfp963	1.56811	1	FALSE	FALSE
NM_029999	13	13	77889	Lbh	1.4033	1.11394	FALSE	FALSE
NM_024181	179	104	66861	Dnajc10	2.54221	2.01703	FALSE	FALSE
NM_144874	146	66	226139	Cox15	2.45371	1.81954	FALSE	FALSE
NM_177249	88	60	74996	Usp47	2.23384	1.77815	FALSE	FALSE
NM_001048227	17	12	52840	Dbndd2	1.5198	1.07918	FALSE	FALSE
NM_181279	187	90	107976	Bre	2.5612	1.95424	FALSE	FALSE
NM_001164147	13	13	21423	Tcf3	1.4033	1.11394	FALSE	FALSE
NM_024260	91	28	73288	Ccdc132	2.2484	1.44716	FALSE	FALSE
NM_133832	11	10	98711	Rdh10	1.33075	1	FALSE	FALSE
NM_207207	98	44	99045	Mrps26	2.28058	1.64345	FALSE	FALSE
NM_008019	620	226	14225	Fkbp1a	3.08175	2.35411	FALSE	FALSE
NM_001199308_dup1	59	4	NA	NA	2.06021	1	FALSE	FALSE
NM_021322	50	34	57773	Wdr4	1.98833	1.53148	FALSE	FALSE
NM_011530	168	97	21355	Tap2	2.51466	1.98677	FALSE	FALSE
NM_001172092	52	22	76131	Depdc1a	2.00536	1.34242	FALSE	FALSE
NM_009456	1913	501	22195	Ube2l3	3.57107	2.69984	FALSE	FALSE
NM_009229	60	32	20650	Sntb2	2.06751	1.50515	FALSE	FALSE
NM_027193	122	41	69740	Dph5	2.37572	1.61278	FALSE	FALSE
NM_133708	168	60	69080	Gmppa	2.51466	1.77815	FALSE	FALSE
NM_009096	5095	2188	20104	Rps6	3.9965	3.34005	FALSE	FALSE
NM_001163836	22	10	67543	Pabpc6	1.63178	1	FALSE	FALSE
NM_001256033	34	26	73945	Otud4	1.82083	1.41497	FALSE	FALSE
NM_031406	49	32	83704	Slc12a9	1.97955	1.50515	FALSE	FALSE
NM_001039151	6444	3647	12505	Cd44	4.09851	3.56194	FALSE	FALSE
NM_001122765	268	103	64383	Sirt2	2.71749	2.01284	FALSE	FALSE
NM_144801	28	14	70209	Tmem143	1.73651	1.14613	FALSE	FALSE
NM_177256	38	15	320769	Prdx6b	1.86914	1.17609	FALSE	FALSE
NM_021384	564	769	58185	Rsad2	3.04063	2.88593	FALSE	FALSE
NM_001101804_dup3	141	57	NA	NA	2.43857	1.75587	FALSE	FALSE
NM_181266	101	62	104348	Zfp120	2.29368	1.79239	FALSE	FALSE
NM_011552	89	47	21453	Tcof1	2.23875	1.6721	FALSE	FALSE
NM_133919	133	60	17355	Aff1	2.41321	1.77815	FALSE	FALSE
NM_019408	257	252	18034	Nfkb2	2.69929	2.4014	FALSE	FALSE
NM_001081259	80	44	226844	Mfsd7b	2.19245	1.64345	FALSE	FALSE
NM_207214	79	61	105504	Exoc5	2.18698	1.78533	FALSE	FALSE
NM_001177730	76	40	22259	Nr1h3	2.17017	1.60206	FALSE	FALSE
NM_016980	4753	2220	100503670	Rpl5	3.96632	3.34635	FALSE	FALSE
NM_009584	87	106	22791	Dnajc2	2.22887	2.02531	FALSE	FALSE
NM_001145779	52	92	16563	Kif2a	2.00536	1.96379	FALSE	FALSE
NM_021429	90	25	58240	Hs1bp3	2.2436	1.39794	FALSE	FALSE
NM_024471	109	47	79464	Lias	2.32678	1.6721	FALSE	FALSE
NM_025692	221	170	66663	Uba5	2.63375	2.23045	FALSE	FALSE
NM_001033236	34	13	207965	Vcpkmt	1.82083	1.11394	FALSE	FALSE
NM_001252316	290	114	108037	Shmt2	2.75175	2.0569	FALSE	FALSE
NM_001199020	34	22	52477	Angel2	1.82083	1.34242	FALSE	FALSE
NM_001177405_dup3	20	2	NA	NA	1.59039	1	FALSE	FALSE
NM_028017	233	77	108123	Napg	2.65671	1.88649	FALSE	FALSE
NM_001173550	6467	2966	12273	C5ar1	4.10006	3.47217	FALSE	FALSE
NM_011721	18	14	22427	Wrn	1.54463	1.14613	FALSE	FALSE
NM_027764	30	17	71330	Rcbtb1	1.76648	1.23045	FALSE	FALSE
NM_146003	22	27	215351	Senp6	1.63178	1.43136	FALSE	FALSE
NM_001105667	94	37	21915	Dtymk	2.26248	1.5682	FALSE	FALSE
NM_001162938	84	58	100033459	Pydc3	2.21363	1.76343	FALSE	FALSE
NM_001122992	23	20	56809	Gmeb1	1.65108	1.30103	FALSE	FALSE
NM_172585	262	225	217980	Larp4b	2.70766	2.35218	FALSE	FALSE
NM_029502	63	63	76025	Cant1	2.0887	1.79934	FALSE	FALSE
NM_026194	112	71	67490	Ufl1	2.33857	1.85126	FALSE	FALSE
NM_011369	95	80	20419	Shcbp1	2.26708	1.90309	FALSE	FALSE
NM_026341	43	26	67725	Nudt13	1.92282	1.41497	FALSE	FALSE
NM_025362	70	42	66114	Dnajc30	2.13445	1.62325	FALSE	FALSE
NM_008907	17720	5235	268373	Ppia	4.53782	3.71892	FALSE	FALSE
NM_010726	204	66	16922	Phyh	2.59899	1.81954	FALSE	FALSE
NM_025432	111	21	66226	Trappc2	2.33468	1.32222	FALSE	FALSE
NM_008446	75	44	16571	Kif4	2.16442	1.64345	FALSE	FALSE
NM_001008506	60	102	75553	Zc3h14	2.06751	2.0086	FALSE	FALSE
NM_011905	1240	623	24088	Tlr2	3.38278	2.79449	FALSE	FALSE
NM_134125	60	45	106628	Trip10	2.06751	1.65321	FALSE	FALSE
NM_173018	22	8	270163	Myo9a	1.63178	1	FALSE	FALSE
NM_145925	348	142	108705	Pttg1ip	2.83093	2.15229	FALSE	FALSE
NM_009614	295	586	11490	Adam15	2.75918	2.7679	FALSE	FALSE
NM_001166501	19	34	329260	Dennd1b	1.56811	1.53148	FALSE	FALSE
NM_173450	12	20	271842	Rpusd2	1.36854	1.30103	FALSE	FALSE
NM_001160402	16	11	277203	Tm4sf19	1.49348	1.04139	FALSE	FALSE
NM_001205367	1734	825	235072	2016-09-07	3.5284	2.91645	FALSE	FALSE
NM_172967	27	8	269033	4930503L19Rik	1.72072	1	FALSE	FALSE
NM_134091	29	10	105835	Sgsm3	1.75175	1	FALSE	FALSE
NM_025995	92	100	67141	Fbxo5	2.25314	2	FALSE	FALSE
NM_001163160	153	52	13026	Pcyt1a	2.47405	1.716	FALSE	FALSE
NM_183167	71	55	233168	AI987944	2.14061	1.74036	FALSE	FALSE
NM_027324	168	112	14057	Sfxn1	2.51466	2.04922	FALSE	FALSE
NM_011220	41	24	19286	Pts	1.90214	1.38021	FALSE	FALSE
NM_001199204	98	174	70834	Spag9	2.28058	2.24055	FALSE	FALSE
NM_029371	56	20	72459	Htatsf1	2.03754	1.30103	FALSE	FALSE
NM_001037997	92	50	14158	Fert2	2.25314	1.69897	FALSE	FALSE
NM_134150	717	191	107260	Otub1	3.14487	2.28103	FALSE	FALSE
NM_028242	56	20	72459	Htatsf1	2.03754	1.30103	FALSE	FALSE
NM_007616	299	131	12389	Cav1	2.76503	2.11727	FALSE	FALSE
NM_145468	46	17	27401	Skp2	1.95211	1.23045	FALSE	FALSE
NM_018757	34	7	54369	Nme6	1.82083	1	FALSE	FALSE
NM_145950	55	88	209212	Osgin2	2.02972	1.94448	FALSE	FALSE
NM_011970	1254	462	26445	Psmb2	3.38765	2.66464	FALSE	FALSE
NM_010515	480	472	16004	Igf2r	2.9706	2.67394	FALSE	FALSE
NM_001163476	42	23	69270	Gins1	1.9126	1.36173	FALSE	FALSE
NM_053217	102	83	112419	2010002M12Rik	2.29796	1.91908	FALSE	FALSE
NM_001099319	36	10	100039968	Gm12942	1.84566	1	FALSE	FALSE
NM_170590	138	78	266692	Cpne1	2.42923	1.89209	FALSE	FALSE
NM_001081633	66	26	27886	Dgcr14	2.1089	1.41497	FALSE	FALSE
NM_011673	56	114	22234	Ugcg	2.03754	2.0569	FALSE	FALSE
NM_008521	57	30	17001	Ltc4s	2.04523	1.47712	FALSE	FALSE
NM_001037759	133	144	170755	Sgk3	2.41321	2.15836	FALSE	FALSE
NM_001110193	571	358	16331	Inpp5d	3.04599	2.55388	FALSE	FALSE
NM_001037922	31	12	624855	Cks1brt	1.78072	1.07918	FALSE	FALSE
NM_001198913	362	207	16800	Arhgef2	2.84806	2.31597	FALSE	FALSE
NM_001163542	644	432	18810	Plec	3.09824	2.63548	FALSE	FALSE
NM_023409	4405	1376	67963	Npc2	3.9333	3.13862	FALSE	FALSE
NM_144908	10	11	231050	Galnt11	1.28936	1.04139	FALSE	FALSE
NM_010560	105	59	16195	Il6st	2.31054	1.77085	FALSE	FALSE
NM_153153	17	9	225115	Svil	1.5198	1	FALSE	FALSE
NM_198619	34	37	242747	Zfp933	1.82083	1.5682	FALSE	FALSE
NM_001130151	177	168	16801	Arhgef1	2.53733	2.22531	FALSE	FALSE
NM_001253863	79	77	21406	Tcf12	2.18698	1.88649	FALSE	FALSE
NM_009786	474	279	12301	Cacybp	2.96513	2.4456	FALSE	FALSE
NM_030715	95	98	80905	Polh	2.26708	1.99123	FALSE	FALSE
NM_021498	113	48	59001	Pole3	2.34243	1.68124	FALSE	FALSE
NM_025641	385	92	66576	Uqcrh	2.87482	1.96379	FALSE	FALSE
NM_001172148	30	9	237073	Rbm41	1.76648	1	FALSE	FALSE
NM_133933	1136	854	103963	Rpn1	3.34473	2.93146	FALSE	FALSE
NM_022309	234	178	12400	Cbfb	2.65857	2.25042	FALSE	FALSE
NM_009412	639	279	21985	Tpd52	3.09486	2.4456	FALSE	FALSE
NM_018869	15	9	14773	Grk5	1.46545	1	FALSE	FALSE
NM_008020	245	143	14227	Fkbp2	2.67852	2.15534	FALSE	FALSE
NM_001113383	275	257	14660	Gls	2.72869	2.40993	FALSE	FALSE
NM_172725	43	27	231855	Ap5z1	1.92282	1.43136	FALSE	FALSE
NM_138679	34	24	192195	Ash1l	1.82083	1.38021	FALSE	FALSE
NM_029609	69	20	76429	Lhpp	2.1282	1.30103	FALSE	FALSE
NM_009298	96	56	20935	Surf6	2.27163	1.74819	FALSE	FALSE
NM_001270495	66	23	100039257	Tmem254b	2.1089	1.36173	FALSE	FALSE
NM_001013256	37	24	68964	Ctc1	1.85756	1.38021	FALSE	FALSE
NM_133757	114	162	74451	Pgs1	2.34626	2.20952	FALSE	FALSE
NM_028071	2323	784	72042	Cotl1	3.6554	2.89432	FALSE	FALSE
NM_001113527	14	12	57444	Isg20	1.43548	1.07918	FALSE	FALSE
NM_029775	147	126	76863	Dcun1d5	2.45667	2.10037	FALSE	FALSE
NM_021876	217	159	13626	Eed	2.62581	2.2014	FALSE	FALSE
NM_026006	12	1	67158	Sft2d3	1.36854	1	FALSE	FALSE
NM_001193303	586	323	110829	Lims1	3.05725	2.5092	FALSE	FALSE
NM_001098837	18	15	217218	Atxn7l3	1.54463	1.17609	FALSE	FALSE
NM_008899	9	22	18992	Pou3f2	1.2436	1.34242	FALSE	FALSE
NM_181424	29	7	52856	Mtg2	1.75175	1	FALSE	FALSE
NM_001079876	181	72	237436	Gas2l3	2.54703	1.85733	FALSE	FALSE
NM_174868	11	4	215708	Fam73a	1.33075	1	FALSE	FALSE
NM_028291	22	29	72587	Pan3	1.63178	1.4624	FALSE	FALSE
NM_007645	982	506	12493	Cd37	3.28147	2.70415	FALSE	FALSE
NM_027799	57	139	71452	Ankrd40	2.04523	2.14301	FALSE	FALSE
NM_145437	308	124	217305	Cd300ld	2.77791	2.09342	FALSE	FALSE
NM_026521	167	141	68036	Zfp706	2.51207	2.14922	FALSE	FALSE
NM_008204	173	96	14990	H2-M2	2.5274	1.98227	FALSE	FALSE
NM_153197	151	48	73149	Clec4a3	2.46833	1.68124	FALSE	FALSE
NM_001085493	29	20	76947	Ndufaf6	1.75175	1.30103	FALSE	FALSE
NM_001161823	100	63	230674	Kdm4a	2.28936	1.79934	FALSE	FALSE
NM_001025262	661	314	21985	Tpd52	3.10956	2.49693	FALSE	FALSE
NM_001163425	154	25	66915	Myeov2	2.47688	1.39794	FALSE	FALSE
NM_153056	112	66	209011	Sirt7	2.33857	1.81954	FALSE	FALSE
NM_001164226	60	31	18181	Nrf1	2.06751	1.49136	FALSE	FALSE
NM_001081642	15	4	434794	Xlr4a	1.46545	1	FALSE	FALSE
NM_011602	1497	743	21894	Tln1	3.46458	2.87099	FALSE	FALSE
NM_133869	422	246	99712	Cept1	2.91467	2.39094	FALSE	FALSE
NM_001024849	125	43	329575	Gm14325	2.38627	1.63347	FALSE	FALSE
NM_007630	362	311	12442	Ccnb2	2.84806	2.49276	FALSE	FALSE
NM_001163591	33	14	74732	Stx11	1.80787	1.14613	FALSE	FALSE
NM_001017968	11	76	503610	Zdhhc18	1.33075	1.88081	FALSE	FALSE
NM_001166480	879	332	20832	Ssr4	3.23334	2.52114	FALSE	FALSE
NM_001163300	139	76	224903	Safb	2.43237	1.88081	FALSE	FALSE
NM_010227	2103	1252	192176	Flna	3.61219	3.0976	FALSE	FALSE
NM_011488	116	67	20850	Stat5a	2.35381	1.82607	FALSE	FALSE
NM_001163018	84	121	52615	Suz12	2.21363	2.08279	FALSE	FALSE
NM_144896	36	17	229487	Gatb	1.84566	1.23045	FALSE	FALSE
NM_153489	425	256	74383	Ubap2l	2.91774	2.40824	FALSE	FALSE
NM_146201	15	12	233887	Zfp553	1.46545	1.07918	FALSE	FALSE
NM_001163450	6	15	30957	Mapk8ip3	1.06751	1.17609	FALSE	FALSE
NM_019736	332	160	56360	Acot9	2.81049	2.20412	FALSE	FALSE
NM_001077360	111	84	26431	Git2	2.33468	1.92428	FALSE	FALSE
NM_001177626	63	33	13605	Ect2	2.0887	1.51851	FALSE	FALSE
NM_001029855	1564	653	19188	Psme2	3.48359	2.81491	FALSE	FALSE
NM_007454	493	260	11764	Ap1b1	2.9822	2.41497	FALSE	FALSE
NM_016676	764	437	19325	Rab10	3.17245	2.64048	FALSE	FALSE
NM_028127	57	28	319710	Frmd6	2.04523	1.44716	FALSE	FALSE
NM_145158	231	341	246707	Emilin2	2.65297	2.53275	FALSE	FALSE
NM_023294	146	128	67052	Ndc80	2.45371	2.10721	FALSE	FALSE
NM_025748	42	22	66757	Adat2	1.9126	1.34242	FALSE	FALSE
NM_023423	336	253	68050	Akirin1	2.81569	2.40312	FALSE	FALSE
NM_175034	25	9	317750	Slc24a5	1.6873	1	FALSE	FALSE
NM_173047	47	14	109857	Cbr3	1.96145	1.14613	FALSE	FALSE
NM_027236	100	39	69860	Eif1ad	2.28936	1.59106	FALSE	FALSE
NM_145994	797	314	11308	Abi1	3.19081	2.49693	FALSE	FALSE
NM_028475	438	253	74383	Ubap2l	2.93083	2.40312	FALSE	FALSE
NM_001136496	31	23	71508	Zfp935	1.78072	1.36173	FALSE	FALSE
NM_009579	71	39	22782	Slc30a1	2.14061	1.59106	FALSE	FALSE
NM_016742	799	399	12539	Cdc37	3.1919	2.60097	FALSE	FALSE
NM_011343	1699	1221	20335	Sec61g	3.51955	3.08672	FALSE	FALSE
NM_001085408	35	42	68112	Sdccag3	1.83342	1.62325	FALSE	FALSE
NM_001146222	165	54	66310	Dpy30	2.50684	1.73239	FALSE	FALSE
NM_001080388	92	49	13728	Mark2	2.25314	1.6902	FALSE	FALSE
NM_010191	152	64	14137	Fdft1	2.4712	1.80618	FALSE	FALSE
NM_023647	143	67	93790	Nipa2	2.44469	1.82607	FALSE	FALSE
NM_001205095	34	43	240038	Gm4944	1.82083	1.63347	FALSE	FALSE
NM_001163627	45	34	73942	Fam151b	1.94257	1.53148	FALSE	FALSE
NM_008961	79	17	19212	Pter	2.18698	1.23045	FALSE	FALSE
NM_010700	260	209	16835	Ldlr	2.70433	2.32015	FALSE	FALSE
NM_001025587	82	37	75692	Nr2c2ap	2.20317	1.5682	FALSE	FALSE
NM_025924	50	52	67031	Upf3a	1.98833	1.716	FALSE	FALSE
NM_008378	200	48	16210	Impact	2.59039	1.68124	FALSE	FALSE
NM_010418	37	34	15204	Herc2	1.85756	1.53148	FALSE	FALSE
NM_001035525	40	15	100317	AU040320	1.89142	1.17609	FALSE	FALSE
NM_007653	4256	2194	12512	Cd63	3.91836	3.34124	FALSE	FALSE
NM_145425	19	7	216560	Wdpcp	1.56811	1	FALSE	FALSE
NM_020566	42	12	57431	Dnajc4	1.9126	1.07918	FALSE	FALSE
NM_001159616	24	31	56176	Pigp	1.66957	1.49136	FALSE	FALSE
NM_001039169	335	135	26987	Eif4e2	2.8144	2.13033	FALSE	FALSE
NM_144839	46	40	218793	Ube2e2	1.95211	1.60206	FALSE	FALSE
NM_001080969	39	12	66628	Thg1l	1.88042	1.07918	FALSE	FALSE
NM_011508	3192	1645	20918	Eif1	3.79342	3.21617	FALSE	FALSE
NM_133187	28	19	68659	Fam198b	1.73651	1.27875	FALSE	FALSE
NM_001008705	292	93	231889	Bud31	2.75474	1.96848	FALSE	FALSE
NM_010235	61	32	14283	Fosl1	2.07469	1.50515	FALSE	FALSE
NM_028791	261	173	74157	Cmtr1	2.706	2.23805	FALSE	FALSE
NM_172540	55	53	215201	Trmt2b	2.02972	1.72428	FALSE	FALSE
NM_030026	39	15	78038	Mccc2	1.88042	1.17609	FALSE	FALSE
NM_001136071	676	371	16985	Lsp1	3.1193	2.56937	FALSE	FALSE
NM_019702	49	13	56422	Hbs1l	1.97955	1.11394	FALSE	FALSE
NM_001029843	158	95	22367	Vrk1	2.48801	1.97772	FALSE	FALSE
NM_001252616	16	7	53618	Fut8	1.49348	1	FALSE	FALSE
NM_001040396	374	180	69227	Selt	2.86223	2.25527	FALSE	FALSE
NM_007420	45	46	11555	Adrb2	1.94257	1.66276	FALSE	FALSE
NM_001037761	2108	1070	12345	Capzb	3.61323	3.02938	FALSE	FALSE
NM_028135	11	9	72160	Tmem163	1.33075	1	FALSE	FALSE
NM_201392	515	403	18810	Plec	3.00116	2.60531	FALSE	FALSE
NM_010763	27	22	17156	Man1a2	1.72072	1.34242	FALSE	FALSE
NM_001166650	21	6	208968	Zfp280c	1.61157	1	FALSE	FALSE
NM_008403	103	37	16413	Itgb1bp1	2.30219	1.5682	FALSE	FALSE
NM_023149	2082	670	66054	Cndp2	3.60784	2.82607	FALSE	FALSE
NM_001008543	86	37	17859	Mxi1	2.22385	1.5682	FALSE	FALSE
NM_023431	45	24	68114	Mum1	1.94257	1.38021	FALSE	FALSE
NM_011290	6948	2579	19988	Rpl6	4.13122	3.41145	FALSE	FALSE
NM_011401	19	13	20527	Slc2a3	1.56811	1.11394	FALSE	FALSE
NM_001166456	162	122	105727	Slc38a1	2.49887	2.08636	FALSE	FALSE
NM_030093	31	4	78372	Snrnp25	1.78072	1	FALSE	FALSE
NM_007806	2911	1457	13057	Cyba	3.7534	3.16346	FALSE	FALSE
NM_175646	27	11	234723	Txnl4b	1.72072	1.04139	FALSE	FALSE
NM_001168223	88	41	70809	Clec2g	2.23384	1.61278	FALSE	FALSE
NM_001205083	140	115	20778	Scarb1	2.43548	2.0607	FALSE	FALSE
NM_001163635	54	63	74493	Tnks2	2.02175	1.79934	FALSE	FALSE
NM_001164289	80	44	628705	Phf11c	2.19245	1.64345	FALSE	FALSE
NM_001044389	69	52	270166	Clpx	2.1282	1.716	FALSE	FALSE
NM_025950	52	46	67072	Cdc37l1	2.00536	1.66276	FALSE	FALSE
NM_008384	33	27	16329	Inpp1	1.80787	1.43136	FALSE	FALSE
NM_027927	178	108	71793	Ints12	2.53978	2.03342	FALSE	FALSE
NM_024258	51	38	74112	Usp16	1.99693	1.57978	FALSE	FALSE
NM_001110145	1113	824	20823	Ssb	3.33585	2.91593	FALSE	FALSE
NM_001256133	135	62	93790	Nipa2	2.41969	1.79239	FALSE	FALSE
NM_009000	79	72	19336	Rab24	2.18698	1.85733	FALSE	FALSE
NM_019870	145	60	56292	Naa10	2.45072	1.77815	FALSE	FALSE
NM_001166539	941	269	15361	Hmga1	3.26294	2.42975	FALSE	FALSE
NM_177824	29	17	328829	9830107B12Rik	1.75175	1.23045	FALSE	FALSE
NM_022331	262	106	64209	Herpud1	2.70766	2.02531	FALSE	FALSE
NM_026177	243	196	67467	Gpalpp1	2.67496	2.29226	FALSE	FALSE
NM_025554	206	71	66420	Polr2e	2.60322	1.85126	FALSE	FALSE
NM_008708	50	34	18108	Nmt2	1.98833	1.53148	FALSE	FALSE
NM_001099348_dup1	41	33	NA	NA	1.90214	1.51851	FALSE	FALSE
NM_001033192	13	17	97863	C78339	1.4033	1.23045	FALSE	FALSE
NM_030563	45	60	80750	N4bp1	1.94257	1.77815	FALSE	FALSE
NM_018851	775	387	56045	Samhd1	3.17866	2.58771	FALSE	FALSE
NM_010118	199	81	13654	Egr2	2.58821	1.90849	FALSE	FALSE
NM_175149	74	33	69551	2310022B05Rik	2.15859	1.51851	FALSE	FALSE
NM_181854	94	36	101994	Champ1	2.26248	1.5563	FALSE	FALSE
NM_026887	188	111	108012	Ap1s2	2.56351	2.04532	FALSE	FALSE
NM_001141976	332	200	72119	Tpx2	2.81049	2.30103	FALSE	FALSE
NM_172607	13	4	223646	Naprt	1.4033	1	FALSE	FALSE
NM_001130529	9	16	268417	Zkscan17	1.2436	1.20412	FALSE	FALSE
NM_030233	62	21	78935	Saal1	2.08175	1.32222	FALSE	FALSE
NM_178185_dup1	9878	3813	NA	NA	4.28402	3.58127	FALSE	FALSE
NM_029631	51	15	76491	Abhd14b	1.99693	1.17609	FALSE	FALSE
NM_026043	27	30	67225	Rnpc3	1.72072	1.47712	FALSE	FALSE
NM_031201	199	103	22122	Tsta3	2.58821	2.01284	FALSE	FALSE
NM_009817	433	398	12380	Cast	2.92584	2.59988	FALSE	FALSE
NM_001252443	652	438	21787	Tfg	3.1036	2.64147	FALSE	FALSE
NM_029349	37	24	227446	2310035C23Rik	1.85756	1.38021	FALSE	FALSE
NM_019566	705	628	56212	Rhog	3.13754	2.79796	FALSE	FALSE
NM_031869	152	76	19079	Prkab1	2.4712	1.88081	FALSE	FALSE
NM_001164793	12	24	28015	Polr2m	1.36854	1.38021	FALSE	FALSE
NM_007572	4262	2506	12259	C1qa	3.91897	3.39898	FALSE	FALSE
NM_001170907	124	54	56404	Trip4	2.38278	1.73239	FALSE	FALSE
NM_001033448	83	27	381201	Ap5b1	2.20843	1.43136	FALSE	FALSE
NM_025521	102	26	66374	2310011J03Rik	2.29796	1.41497	FALSE	FALSE
NM_178087	139	60	18854	Pml	2.43237	1.77815	FALSE	FALSE
NM_001171034	4283	1279	110213	Tmbim6	3.9211	3.10687	FALSE	FALSE
NM_183423	8	19	66350	Pla2g12a	1.19245	1.27875	FALSE	FALSE
NM_181821	125	56	353502	Hcfc1r1	2.38627	1.74819	FALSE	FALSE
NM_199477	44	7	393082	Mettl7a2	1.93281	1	FALSE	FALSE
NM_198654	66	25	381318	Nsl1	2.1089	1.39794	FALSE	FALSE
NM_001167730	97	87	58186	Rad18	2.27613	1.93952	FALSE	FALSE
NM_001081975	268	115	100034361	Mfap1b	2.71749	2.0607	FALSE	FALSE
NM_145832	83	28	228368	Slc35c1	2.20843	1.44716	FALSE	FALSE
NM_011852	692	274	23960	Oas1g	3.12946	2.43775	FALSE	FALSE
NM_001033534	34	14	244864	Layn	1.82083	1.14613	FALSE	FALSE
NM_011135	53	54	18983	Cnot7	2.01363	1.73239	FALSE	FALSE
NM_172988	13	11	269514	Fbxl4	1.4033	1.04139	FALSE	FALSE
NM_028834	66	41	74243	Slx4ip	2.1089	1.61278	FALSE	FALSE
NM_001113355	1025	521	30930	Vps26a	3.30008	2.71684	FALSE	FALSE
NM_008601	358	298	17342	Mitf	2.84324	2.47422	FALSE	FALSE
NM_031182	22	17	83383	Tfap4	1.63178	1.23045	FALSE	FALSE
NM_145362	84	95	208211	Alg1	2.21363	1.97772	FALSE	FALSE
NM_172144	10	26	235542	Ppp2r3a	1.28936	1.41497	FALSE	FALSE
NM_148952	58	107	104394	E2f4	2.05278	2.02938	FALSE	FALSE
NM_177367	47	26	276919	Gemin4	1.96145	1.41497	FALSE	FALSE
NM_025837	59	33	110119	Mpi	2.06021	1.51851	FALSE	FALSE
NM_007998	71	76	14151	Fech	2.14061	1.88081	FALSE	FALSE
NM_001145820	171	71	14571	Gpd2	2.52235	1.85126	FALSE	FALSE
NM_026780	308	98	68592	Syf2	2.77791	1.99123	FALSE	FALSE
NM_001253703	59	60	229681	St7l	2.06021	1.77815	FALSE	FALSE
NM_138748	382	161	110854	Ppp2r4	2.87142	2.20683	FALSE	FALSE
NM_001006664	71	45	13821	Epb4.1l1	2.14061	1.65321	FALSE	FALSE
NM_080555	47	28	67916	Ppap2b	1.96145	1.44716	FALSE	FALSE
NM_145528	75	25	51897	Atg13	2.16442	1.39794	FALSE	FALSE
NM_030691	1637	616	80719	Igsf6	3.5034	2.78958	FALSE	FALSE
NM_133666	237	155	17995	Ndufv1	2.6641	2.19033	FALSE	FALSE
NM_026960	362	147	69146	Gsdmd	2.84806	2.16732	FALSE	FALSE
NM_018824	625	277	54338	Slc23a2	3.08524	2.44248	FALSE	FALSE
NM_025338	292	115	66077	Aurkaip1	2.75474	2.0607	FALSE	FALSE
NM_028841	14	15	74257	Tspan17	1.43548	1.17609	FALSE	FALSE
NM_001243067	20	19	73610	Zfp433	1.59039	1.27875	FALSE	FALSE
NM_025468	457	333	66286	Sec11c	2.94927	2.52244	FALSE	FALSE
NM_021886	59	27	26886	Cenph	2.06021	1.43136	FALSE	FALSE
NM_019773	115	25	56382	Rab9	2.35005	1.39794	FALSE	FALSE
NM_001025432	17	19	12914	Crebbp	1.5198	1.27875	FALSE	FALSE
NM_133851	380	273	108907	Nusap1	2.86914	2.43616	FALSE	FALSE
NM_009448	12957	4249	22146	Tuba1c	4.40186	3.62829	FALSE	FALSE
NM_001015039	11	0	231125	Zfyve28	1.33075	1	FALSE	FALSE
NM_027808	46	20	71481	Alpk1	1.95211	1.30103	FALSE	FALSE
NM_001081117	151	198	17345	Mki67	2.46833	2.29667	FALSE	FALSE
NM_026270	67	30	67605	Akt1s1	2.11543	1.47712	FALSE	FALSE
NM_001114332	620	682	72472	Slc16a10	3.08175	2.83378	FALSE	FALSE
NM_001164191	163	58	17772	Mtm1	2.50154	1.76343	FALSE	FALSE
NM_028049	121	71	71999	Fbxo22	2.37214	1.85126	FALSE	FALSE
NM_001039392	908	286	19240	Tmsb10	3.24744	2.45637	FALSE	FALSE
NM_001013378	57	49	231915	Uspl1	2.04523	1.6902	FALSE	FALSE
NM_001045526	14	5	327957	Scimp	1.43548	1	FALSE	FALSE
NM_001004143	228	106	216825	Usp22	2.64729	2.02531	FALSE	FALSE
NM_153387	42	37	51885	Tubgcp4	1.9126	1.5682	FALSE	FALSE
NM_183250	199	75	66167	Tma7	2.58821	1.87506	FALSE	FALSE
NM_001166430	1701	1063	98758	Hnrnpf	3.52006	3.02653	FALSE	FALSE
NM_009541	13	8	22642	Zbtb17	1.4033	1	FALSE	FALSE
NM_001098227	6096	3131	53378	Sdcbp	4.0744	3.49568	FALSE	FALSE
NM_001159964	157	230	13858	Eps15	2.48525	2.36173	FALSE	FALSE
NM_144866	703	394	225363	Etf1	3.13631	2.5955	FALSE	FALSE
NM_001166360	12	20	77877	6030458C11Rik	1.36854	1.30103	FALSE	FALSE
NM_001083810	18	20	72446	Prr5l	1.54463	1.30103	FALSE	FALSE
NM_001270537	293	145	668218	Bin2	2.75622	2.16137	FALSE	FALSE
NM_027901	49	50	71752	Gtf3c2	1.97955	1.69897	FALSE	FALSE
NM_016686	76	76	22344	Vezf1	2.17017	1.88081	FALSE	FALSE
NM_001164533	191	136	65111	Dap3	2.57039	2.13354	FALSE	FALSE
NM_029420	16	6	75764	Slx1b	1.49348	1	FALSE	FALSE
NM_146150	103	120	230598	Nrd1	2.30219	2.07918	FALSE	FALSE
NM_001130169	934	485	22680	Zfp207	3.2597	2.68574	FALSE	FALSE
NM_201406	335	207	276846	Pigs	2.8144	2.31597	FALSE	FALSE
NM_025280	59	32	16588	Kin	2.06021	1.50515	FALSE	FALSE
NM_025679	171	73	66641	Sike1	2.52235	1.86332	FALSE	FALSE
NM_021334	227	91	16411	Itgax	2.64538	1.95904	FALSE	FALSE
NM_172939	35	28	268301	Sowahc	1.83342	1.44716	FALSE	FALSE
NM_021525	62	75	59028	Rcl1	2.08175	1.87506	FALSE	FALSE
NM_011823	11	7	23890	Gpr34	1.33075	1	FALSE	FALSE
NM_020034	3027	1020	56702	Hist1h1b	3.77037	3.0086	FALSE	FALSE
NM_009831	367	287	12450	Ccng1	2.85402	2.45788	FALSE	FALSE
NM_028232	32	24	72415	Sgol1	1.79451	1.38021	FALSE	FALSE
NM_025864	363	248	66950	Tmem206	2.84926	2.39445	FALSE	FALSE
NM_007929	300	116	13731	Emp2	2.76648	2.06446	FALSE	FALSE
NM_026582	239	204	68151	Wls	2.66775	2.30963	FALSE	FALSE
NM_177583	81	41	208117	Aph1b	2.19784	1.61278	FALSE	FALSE
NM_010806	14	17	17356	Mllt4	1.43548	1.23045	FALSE	FALSE
NM_199301	58	23	212508	Mtg1	2.05278	1.36173	FALSE	FALSE
NM_013771	640	390	27377	Yme1l1	3.09554	2.59106	FALSE	FALSE
NM_001013824	57	21	435337	Gm5662	2.04523	1.32222	FALSE	FALSE
NM_010547	125	100	16151	Ikbkg	2.38627	2	FALSE	FALSE
NM_153178	50	92	239528	Ago2	1.98833	1.96379	FALSE	FALSE
NM_001033156	66	96	70611	Fbxo33	2.1089	1.98227	FALSE	FALSE
NM_146239	76	84	237459	Cdk17	2.17017	1.92428	FALSE	FALSE
NM_172272	14	5	230577	Pars2	1.43548	1	FALSE	FALSE
NM_145599	29	12	234463	Tmem184c	1.75175	1.07918	FALSE	FALSE
NM_027000	436	196	69237	Gtpbp4	2.92884	2.29226	FALSE	FALSE
NM_080638	669	261	78388	Mvp	3.11478	2.41664	FALSE	FALSE
NM_007712	43	64	12748	Clk2	1.92282	1.80618	FALSE	FALSE
NM_001033606	45	50	74205	Acsl3	1.94257	1.69897	FALSE	FALSE
NM_001039723	39	26	330189	Tmem120b	1.88042	1.41497	FALSE	FALSE
NM_025389	163	73	66156	Anapc11	2.50154	1.86332	FALSE	FALSE
NM_178775	38	26	320119	Rps6kc1	1.86914	1.41497	FALSE	FALSE
NM_001253691	13	11	56218	Patz1	1.4033	1.04139	FALSE	FALSE
NM_013872	27	19	29858	Pmm1	1.72072	1.27875	FALSE	FALSE
NM_001177480_dup1	70	14	NA	NA	2.13445	1.14613	FALSE	FALSE
NM_001142920	85	60	21416	Tcf7l2	2.21877	1.77815	FALSE	FALSE
NM_013515	1129	397	13830	Stom	3.34205	2.59879	FALSE	FALSE
NM_172416	196	144	14628	Ostm1	2.58161	2.15836	FALSE	FALSE
NM_001161413	2352	1149	17254	Slc3a2	3.66079	3.06032	FALSE	FALSE
NM_001163532	57	17	72392	Tmem175	2.04523	1.23045	FALSE	FALSE
NM_015827	546	230	50797	Copb2	3.02655	2.36173	FALSE	FALSE
NM_001159551	789	613	14950	H13	3.18643	2.78746	FALSE	FALSE
NM_001080158	13	3	66570	Cenpm	1.4033	1	FALSE	FALSE
NM_025811	39	42	66866	Nhlrc2	1.88042	1.62325	FALSE	FALSE
NM_001040187	203	210	67040	Ddx17	2.59685	2.32222	FALSE	FALSE
NM_001077695	22	18	17978	Ncoa2	1.63178	1.25527	FALSE	FALSE
NM_026674	103	44	68318	Aph1c	2.30219	1.64345	FALSE	FALSE
NM_029572	623	392	76299	Erp44	3.08384	2.59329	FALSE	FALSE
NM_026124	285	224	67388	1110008F13Rik	2.7442	2.35025	FALSE	FALSE
NM_145502	171	103	226144	Erlin1	2.52235	2.01284	FALSE	FALSE
NM_001252524	1278	1508	233489	Picalm	3.39589	3.1784	FALSE	FALSE
NM_001195083	72	96	54383	Phc2	2.14669	1.98227	FALSE	FALSE
NM_026393	89	57	67824	Nmral1	2.23875	1.75587	FALSE	FALSE
NM_175116	185	64	67168	Lpar6	2.55653	1.80618	FALSE	FALSE
NM_008959	62	149	19210	Ptdss1	2.08175	2.17319	FALSE	FALSE
NM_001243041	236	117	11534	Adk	2.66227	2.06819	FALSE	FALSE
NM_025442	312	193	66248	Alg5	2.78351	2.28556	FALSE	FALSE
NM_001252490	32	59	64291	Osbpl1a	1.79451	1.77085	FALSE	FALSE
NM_001252201	54	87	26921	Map4k4	2.02175	1.93952	FALSE	FALSE
NM_026519	289	136	68032	Emc4	2.75025	2.13354	FALSE	FALSE
NM_019694	112	57	56384	Letm1	2.33857	1.75587	FALSE	FALSE
NM_023343	33	58	67444	Ilkap	1.80787	1.76343	FALSE	FALSE
NM_008722	3636	1571	18148	Npm1	3.84998	3.19618	FALSE	FALSE
NM_001205339	432	142	107272	Psat1	2.92484	2.15229	FALSE	FALSE
NM_001101433	10	16	71918	Zcchc24	1.28936	1.20412	FALSE	FALSE
NM_001112705	29	55	24086	Tlk2	1.75175	1.74036	FALSE	FALSE
NM_023813	535	411	108058	Camk2d	3.01771	2.61384	FALSE	FALSE
NM_028221	205	86	102122	Fam192a	2.60111	1.9345	FALSE	FALSE
NM_001163554	201	113	18987	Pou2f2	2.59255	2.05308	FALSE	FALSE
NM_177323	42	27	72772	Rint1	1.9126	1.43136	FALSE	FALSE
NM_025873	37	14	66966	Trit1	1.85756	1.14613	FALSE	FALSE
NM_020588	22	24	57439	Tmem183a	1.63178	1.38021	FALSE	FALSE
NM_026591	353	198	67707	Mrpl24	2.83713	2.29667	FALSE	FALSE
NM_177688	3557	1320	232440	H2afj	3.84044	3.12057	FALSE	FALSE
NM_153167	23	33	242418	Dcaf10	1.65108	1.51851	FALSE	FALSE
NM_001033145	17	54	68861	1190002N15Rik	1.5198	1.73239	FALSE	FALSE
NM_172261	32	25	217124	Ppp1r9b	1.79451	1.39794	FALSE	FALSE
NM_026186	101	53	67480	Cwc25	2.29368	1.72428	FALSE	FALSE
NM_145564	81	32	231670	Fbxo21	2.19784	1.50515	FALSE	FALSE
NM_001198787	17	1	11302	Aatk	1.5198	1	FALSE	FALSE
NM_001109657	546	192	14457	Gas7	3.02655	2.2833	FALSE	FALSE
NM_026876	150	75	98685	Trmt1l	2.46545	1.87506	FALSE	FALSE
NM_019940	42	40	56707	Zfp111	1.9126	1.60206	FALSE	FALSE
NM_001160043	18	9	73172	Exo5	1.54463	1	FALSE	FALSE
NM_001195025	55	36	74137	Nuak2	2.02972	1.5563	FALSE	FALSE
NM_025374	314	122	109801	Glo1	2.78628	2.08636	FALSE	FALSE
NM_178700	115	133	231413	Grsf1	2.35005	2.12385	FALSE	FALSE
NM_001165985	410	225	74383	Ubap2l	2.90214	2.35218	FALSE	FALSE
NM_013861	40	11	29807	Tpk1	1.89142	1.04139	FALSE	FALSE
NM_001166669	55	47	216766	Gemin5	2.02972	1.6721	FALSE	FALSE
NM_025424	115	59	66208	Nenf	2.35005	1.77085	FALSE	FALSE
NM_001037941	244	179	23950	Dnajb6	2.67675	2.25285	FALSE	FALSE
NM_172405	35	25	70681	Fam175a	1.83342	1.39794	FALSE	FALSE
NM_001130459	455	321	21452	Tcn2	2.94737	2.50651	FALSE	FALSE
NM_009606	17836	5730	11459	Acta1	4.54065	3.75815	FALSE	FALSE
NM_019636	51	45	57915	Tbc1d1	1.99693	1.65321	FALSE	FALSE
NM_029561	146	125	76273	Ndfip2	2.45371	2.09691	FALSE	FALSE
NM_173442	176	94	14537	Gcnt1	2.53487	1.97313	FALSE	FALSE
NM_145511	196	71	226499	BC003331	2.58161	1.85126	FALSE	FALSE
NM_025590	52	24	329910	Acot11	2.00536	1.38021	FALSE	FALSE
NM_029279	30	31	75420	Secisbp2	1.76648	1.49136	FALSE	FALSE
NM_025301	331	92	27397	Mrpl17	2.80918	1.96379	FALSE	FALSE
NM_007482	164	87	11846	Arg1	2.5042	1.93952	FALSE	FALSE
NM_025969	35	17	67105	Timm21	1.83342	1.23045	FALSE	FALSE
NM_011885	90	51	24030	Mrps12	2.2436	1.70757	FALSE	FALSE
NM_009853	10463	5351	12514	Cd68	4.30901	3.72843	FALSE	FALSE
NM_011232	55	28	19355	Rad1	2.02972	1.44716	FALSE	FALSE
NM_134142	675	254	68539	Tmem109	3.11866	2.40483	FALSE	FALSE
NM_020625	6	15	81630	Zbtb22	1.06751	1.17609	FALSE	FALSE
NM_145942	182	162	208715	Hmgcs1	2.54943	2.20952	FALSE	FALSE
NM_011962	307	208	26433	Plod3	2.77649	2.31806	FALSE	FALSE
NM_019683	72	15	56503	Ankrd49	2.14669	1.17609	FALSE	FALSE
NM_008810	318	165	18597	Pdha1	2.79178	2.21748	FALSE	FALSE
NM_001037848	26	9	72068	Cnot2	1.70433	1	FALSE	FALSE
NM_008249	56	36	15278	Tfb2m	2.03754	1.5563	FALSE	FALSE
NM_028904	104	66	74386	Rmi1	2.30639	1.81954	FALSE	FALSE
NM_001160379	89	78	212943	Fam46a	2.23875	1.89209	FALSE	FALSE
NM_001043317	11	5	12483	Cd22	1.33075	1	FALSE	FALSE
NM_010121	19	18	13666	Eif2ak3	1.56811	1.25527	FALSE	FALSE
NM_001167886	28	13	225888	Suv420h1	1.73651	1.11394	FALSE	FALSE
NM_001025577	391	242	17132	Maf	2.88153	2.38382	FALSE	FALSE
NM_198001	52	34	73737	1110008P14Rik	2.00536	1.53148	FALSE	FALSE
NM_152803	83	98	15442	Hpse	2.20843	1.99123	FALSE	FALSE
NM_021550	222	111	59048	C1galt1c1	2.63571	2.04532	FALSE	FALSE
NM_011647	37	51	22084	Tsc2	1.85756	1.70757	FALSE	FALSE
NM_013814	50	62	14423	Galnt1	1.98833	1.79239	FALSE	FALSE
NM_001005867	48	35	52915	Zmiz2	1.9706	1.54407	FALSE	FALSE
NM_175512	130	82	241452	Dhrs9	2.4033	1.91381	FALSE	FALSE
NM_001163705	83	56	50762	Fbxo6	2.20843	1.74819	FALSE	FALSE
NM_016897	200	182	53600	Timm23	2.59039	2.26007	FALSE	FALSE
NM_175242	282	205	76448	Ppp1r18	2.7396	2.31175	FALSE	FALSE
NM_001081320	32	5	72023	Cyb561d1	1.79451	1	FALSE	FALSE
NM_009938	801	363	12847	Copa	3.19299	2.55991	FALSE	FALSE
NM_153794	133	95	108654	Fam210a	2.41321	1.97772	FALSE	FALSE
NM_001177406_dup3	92	35	NA	NA	2.25314	1.54407	FALSE	FALSE
NM_001199177	106	81	74143	Opa1	2.31466	1.90849	FALSE	FALSE
NM_001005508	200	103	226652	Arhgap30	2.59039	2.01284	FALSE	FALSE
NM_027457	99	62	70544	Tmem242	2.28499	1.79239	FALSE	FALSE
NM_001177753	293	220	170768	Pfkfb3	2.75622	2.34242	FALSE	FALSE
NM_013678	62	22	20931	Surf2	2.08175	1.34242	FALSE	FALSE
NM_001113470	20	33	52468	Ctdsp2	1.59039	1.51851	FALSE	FALSE
NM_133781	469	356	12283	Cab39	2.96053	2.55145	FALSE	FALSE
NM_009798	2507	1314	12345	Capzb	3.68851	3.1186	FALSE	FALSE
NM_177262	127	121	320795	Pkn1	2.39316	2.08279	FALSE	FALSE
NM_025635	523	157	52696	Zwint	3.00786	2.1959	FALSE	FALSE
NM_053168	24	13	94091	Trim11	1.66957	1.11394	FALSE	FALSE
NM_001033299	36	28	228913	Zfp217	1.84566	1.44716	FALSE	FALSE
NM_001013792	111	91	432940	Otulin	2.33468	1.95904	FALSE	FALSE
NM_001253758	147	44	66471	Anp32e	2.45667	1.64345	FALSE	FALSE
NM_001127338	127	25	110695	Aldh7a1	2.39316	1.39794	FALSE	FALSE
NM_001199043	515	181	56048	Lgals8	3.00116	2.25768	FALSE	FALSE
NM_207530	25	16	64291	Osbpl1a	1.6873	1.20412	FALSE	FALSE
NM_133907	82	70	100763	Ube3c	2.20317	1.8451	FALSE	FALSE
NM_022964	331	123	56743	Lat2	2.80918	2.08991	FALSE	FALSE
NM_009404	150	67	21950	Tnfsf9	2.46545	1.82607	FALSE	FALSE
NM_027088	29	26	104416	Bap1	1.75175	1.41497	FALSE	FALSE
NM_001081247	60	39	218832	Polr3a	2.06751	1.59106	FALSE	FALSE
NM_026959	119	72	71116	Stx18	2.3649	1.85733	FALSE	FALSE
NM_001159418	295	170	16391	Irf9	2.75918	2.23045	FALSE	FALSE
NM_001042655	66	24	233204	Tbc1d17	2.1089	1.38021	FALSE	FALSE
NM_194342	212	167	223697	Sun2	2.61569	2.22272	FALSE	FALSE
NM_001007465	17	17	67338	Rffl	1.5198	1.23045	FALSE	FALSE
NM_001199307_dup1	59	4	NA	NA	2.06021	1	FALSE	FALSE
NM_001036740	36	38	232984	B3gnt8	1.84566	1.57978	FALSE	FALSE
NM_021437	86	9	58248	1700123O20Rik	2.22385	1	FALSE	FALSE
NM_001033202	24	21	100756	Usp30	1.66957	1.32222	FALSE	FALSE
NM_178609	15	17	52679	E2f7	1.46545	1.23045	FALSE	FALSE
NM_028005	25	18	71923	2310047M10Rik	1.6873	1.25527	FALSE	FALSE
NM_009471	159	87	22247	Umps	2.49075	1.93952	FALSE	FALSE
NM_133688	51	13	67636	Lyrm5	1.99693	1.11394	FALSE	FALSE
NM_029789	837	959	76893	Cers2	3.21208	2.98182	FALSE	FALSE
NM_172742	47	46	233315	Mtmr10	1.96145	1.66276	FALSE	FALSE
NM_001162416	47	22	18640	Pfkfb2	1.96145	1.34242	FALSE	FALSE
NM_146011	85	51	216445	Arhgap9	2.21877	1.70757	FALSE	FALSE
NM_176849	108	98	234023	Arglu1	2.32278	1.99123	FALSE	FALSE
NM_027181	228	60	69713	Pin4	2.64729	1.77815	FALSE	FALSE
NM_029929	197	99	77573	Vps33a	2.58382	1.99564	FALSE	FALSE
NM_026810	46	30	17350	Mlh1	1.95211	1.47712	FALSE	FALSE
NM_028184	49	16	72284	Oraov1	1.97955	1.20412	FALSE	FALSE
NM_008915	7	28	19057	Ppp3cc	1.13445	1.44716	FALSE	FALSE
NM_025936	701	377	104458	Rars	3.13507	2.57634	FALSE	FALSE
NM_023233	40	35	66597	Trim13	1.89142	1.54407	FALSE	FALSE
NM_175093	11	7	228775	Trib3	1.33075	1	FALSE	FALSE
NM_134133	54	21	106878	Smim3	2.02175	1.32222	FALSE	FALSE
NM_198122	28	25	94246	Arid4b	1.73651	1.39794	FALSE	FALSE
NM_145933	21	17	20440	St6gal1	1.61157	1.23045	FALSE	FALSE
NM_019650	251	192	56494	Gosr2	2.68903	2.2833	FALSE	FALSE
NM_001166409	2373	611	19652	Rbm3	3.66465	2.78604	FALSE	FALSE
NM_028412	30	40	68379	Ciz1	1.76648	1.60206	FALSE	FALSE
NM_001163389	36	10	74479	Snx11	1.84566	1	FALSE	FALSE
NM_016721	1516	1058	29875	Iqgap1	3.47005	3.02449	FALSE	FALSE
NM_029293	76	27	75454	Phpt1	2.17017	1.43136	FALSE	FALSE
NM_001163684	234	86	66394	Nosip	2.65857	1.9345	FALSE	FALSE
NM_025983	536	226	67126	Atp5e	3.01852	2.35411	FALSE	FALSE
NM_001081654	156	111	21767	Tex264	2.48248	2.04532	FALSE	FALSE
NM_011614	48	64	21944	Tnfsf12	1.9706	1.80618	FALSE	FALSE
NM_001076681	1	11	66274	Lyrm9	1	1.04139	FALSE	FALSE
NM_027350	659	322	70223	Nars	3.10824	2.50786	FALSE	FALSE
NM_080708	63	88	140780	Bmp2k	2.0887	1.94448	FALSE	FALSE
NM_001164568	65	36	20469	Sipa1	2.10227	1.5563	FALSE	FALSE
NM_001199270	1409	545	353204	Aldoart1	3.43827	2.7364	FALSE	FALSE
NM_146169	24	16	232164	Paip2b	1.66957	1.20412	FALSE	FALSE
NM_180956	104	48	29812	Ndrg3	2.30639	1.68124	FALSE	FALSE
NM_172382	100	63	230674	Kdm4a	2.28936	1.79934	FALSE	FALSE
NM_001177543_dup3	140	57	NA	NA	2.43548	1.75587	FALSE	FALSE
NM_007622	166	74	12412	Cbx1	2.50946	1.86923	FALSE	FALSE
NM_145494	87	134	107029	Me2	2.22887	2.1271	FALSE	FALSE
NM_018745	173	149	54375	Azin1	2.5274	2.17319	FALSE	FALSE
NM_007965	974	301	14026	Evl	3.27791	2.47857	FALSE	FALSE
NM_153134	17	13	210146	Irgq	1.5198	1.11394	FALSE	FALSE
NM_144888	194	81	228607	Mavs	2.57716	1.90849	FALSE	FALSE
NM_001002008	26	11	381066	Zfp948	1.70433	1.04139	FALSE	FALSE
NM_032396	51	35	84035	Kremen1	1.99693	1.54407	FALSE	FALSE
NM_001110831	193	60	13437	Dnpep	2.57491	1.77815	FALSE	FALSE
NM_001037747	115	43	332579	Card9	2.35005	1.63347	FALSE	FALSE
NM_010789	16	7	17268	Meis1	1.49348	1	FALSE	FALSE
NM_001166636	12	2	100043247	Gm4312	1.36854	1	FALSE	FALSE
NM_028603	14	12	73680	Zbtb8a	1.43548	1.07918	FALSE	FALSE
NM_029482	23	6	75939	4930579G24Rik	1.65108	1	FALSE	FALSE
NM_025495	54	27	66336	Cenpp	2.02175	1.43136	FALSE	FALSE
NM_001146348	214	72	13805	Eng	2.61977	1.85733	FALSE	FALSE
NM_175026	328	205	236312	Pyhin1	2.80523	2.31175	FALSE	FALSE
NM_173363	423	121	217869	Eif5	2.9157	2.08279	FALSE	FALSE
NM_153141	48	130	59035	Carm1	1.9706	2.11394	FALSE	FALSE
NM_172593	24	8	218613	Mier3	1.66957	1	FALSE	FALSE
NM_001164421	106	56	66943	Pqlc1	2.31466	1.74819	FALSE	FALSE
NM_145076	7	17	21848	Trim24	1.13445	1.23045	FALSE	FALSE
NM_001099349_dup6	162	64	NA	NA	2.49887	1.80618	FALSE	FALSE
NM_026447	19	32	67905	Ppm1m	1.56811	1.50515	FALSE	FALSE
NM_011184	1253	568	19167	Psma3	3.38731	2.75435	FALSE	FALSE
NM_013652	2193	919	20303	Ccl4	3.63039	2.96332	FALSE	FALSE
NM_001142919	84	68	21416	Tcf7l2	2.21363	1.83251	FALSE	FALSE
NM_001195487	633	249	225027	Srsf7	3.09076	2.3962	FALSE	FALSE
NM_172117	43	20	12497	Entpd6	1.92282	1.30103	FALSE	FALSE
NM_023040	99	58	11692	Gfer	2.28499	1.76343	FALSE	FALSE
NM_026753	147	72	68523	Fam96b	2.45667	1.85733	FALSE	FALSE
NM_001033273	184	144	223739	5031439G07Rik	2.55417	2.15836	FALSE	FALSE
NM_011070	249	78	18637	Pfdn2	2.68555	1.89209	FALSE	FALSE
NM_009066	25	19	19763	Ring1	1.6873	1.27875	FALSE	FALSE
NM_019816	75	64	56321	Aatf	2.16442	1.80618	FALSE	FALSE
NM_001110350	97	75	20466	Sin3a	2.27613	1.87506	FALSE	FALSE
NM_175286	9	15	97031	Tprn	1.2436	1.17609	FALSE	FALSE
NM_133921	35	62	100978	Nfxl1	1.83342	1.79239	FALSE	FALSE
NM_018877	67	24	84505	Setdb1	2.11543	1.38021	FALSE	FALSE
NM_029086	44	11	74753	5830415F09Rik	1.93281	1.04139	FALSE	FALSE
NM_172733	371	144	232449	Dera	2.85873	2.15836	FALSE	FALSE
NM_138667	72	89	68652	Tab2	2.14669	1.94939	FALSE	FALSE
NM_029617	38	21	76464	Casc5	1.86914	1.32222	FALSE	FALSE
NM_029976	75	44	52626	Cdkn2aipnl	2.16442	1.64345	FALSE	FALSE
NM_175563	183	153	270906	Prr11	2.55181	2.18469	FALSE	FALSE
NM_001082552	100	57	20821	Trim21	2.28936	1.75587	FALSE	FALSE
NM_025507	389	171	66354	Snw1	2.8793	2.233	FALSE	FALSE
NM_012048	52	18	27015	Polk	2.00536	1.25527	FALSE	FALSE
NM_001253354	29	16	230088	Fam214b	1.75175	1.20412	FALSE	FALSE
NM_029763	55	46	70408	Polr3f	2.02972	1.66276	FALSE	FALSE
NM_001199124	197	179	66442	Spc25	2.58382	2.25285	FALSE	FALSE
NM_001044705	34	12	22697	Zscan21	1.82083	1.07918	FALSE	FALSE
NM_027404	101	63	70369	Bag5	2.29368	1.79934	FALSE	FALSE
NM_001253804	121	103	20498	Slc12a4	2.37214	2.01284	FALSE	FALSE
NM_001110228	493	384	14007	Celf2	2.9822	2.58433	FALSE	FALSE
NM_001122683	6	13	71911	Bdh1	1.06751	1.11394	FALSE	FALSE
NM_009211	156	154	20588	Smarcc1	2.48248	2.18752	FALSE	FALSE
NM_026032	26	24	67207	Lsm1	1.70433	1.38021	FALSE	FALSE
NM_009729	4693	1039	11984	Atp6v0c	3.96081	3.01662	FALSE	FALSE
NM_001177379	9	15	231207	Cpeb2	1.2436	1.17609	FALSE	FALSE
NM_001146010	53	34	207278	Fchsd2	2.01363	1.53148	FALSE	FALSE
NM_009912	743	415	12768	Ccr1	3.16034	2.61805	FALSE	FALSE
NM_133954	101	71	101985	Usb1	2.29368	1.85126	FALSE	FALSE
NM_031999	217	161	83924	Gpr137b	2.62581	2.20683	FALSE	FALSE
NM_001081214	46	54	226169	Pprc1	1.95211	1.73239	FALSE	FALSE
NM_001161457	186	132	12400	Cbfb	2.55887	2.12057	FALSE	FALSE
NM_027130	112	104	69597	Afg3l2	2.33857	2.01703	FALSE	FALSE
NM_021473	4268	1222	58810	Akr1a1	3.91958	3.08707	FALSE	FALSE
NM_026638	305	123	52858	Cdipt	2.77366	2.08991	FALSE	FALSE
NM_001100416	165	64	668030	Gm14432	2.50684	1.80618	FALSE	FALSE
NM_178645	542	244	104184	Blmh	3.02335	2.38739	FALSE	FALSE
NM_009075	42	31	19895	Rpia	1.9126	1.49136	FALSE	FALSE
NM_019805	155	107	56317	Anapc7	2.47969	2.02938	FALSE	FALSE
NM_176979	13	53	235559	Topbp1	1.4033	1.72428	FALSE	FALSE
NM_026168	149	93	67456	Ergic2	2.46254	1.96848	FALSE	FALSE
NM_001252568	81	33	227696	Phyhd1	2.19784	1.51851	FALSE	FALSE
NM_178115	23	16	214764	Edrf1	1.65108	1.20412	FALSE	FALSE
NM_001159421	130	42	381045	Ccdc58	2.4033	1.62325	FALSE	FALSE
NM_001256480_dup1	156	64	NA	NA	2.48248	1.80618	FALSE	FALSE
NM_177411	351	254	19344	Rab5b	2.83466	2.40483	FALSE	FALSE
NM_026898	66	19	68980	Wdr53	2.1089	1.27875	FALSE	FALSE
NM_001199186	60	53	68682	Slc44a2	2.06751	1.72428	FALSE	FALSE
NM_172618	76	37	224671	Btbd9	2.17017	1.5682	FALSE	FALSE
NM_009273	339	147	20813	Srp14	2.81955	2.16732	FALSE	FALSE
NM_001167921	181	76	68153	Gtf2e2	2.54703	1.88081	FALSE	FALSE
NM_026054	140	106	67246	2810474O19Rik	2.43548	2.02531	FALSE	FALSE
NM_008689	300	201	18033	Nfkb1	2.76648	2.3032	FALSE	FALSE
NM_029965	24	11	77733	Rnf170	1.66957	1.04139	FALSE	FALSE
NM_001252454	39	32	13854	Epn1	1.88042	1.50515	FALSE	FALSE
NM_007547	2637	2163	19261	Sirpa	3.71047	3.33506	FALSE	FALSE
NM_022418	13	8	64295	Tmub1	1.4033	1	FALSE	FALSE
NM_001177403	55	20	68554	Cebpzos	2.02972	1.30103	FALSE	FALSE
NM_001166597	71	64	104418	Dgkz	2.14061	1.80618	FALSE	FALSE
NM_139141	27	8	93681	Zkscan8	1.72072	1	FALSE	FALSE
NM_175318	86	46	101685	Spty2d1	2.22385	1.66276	FALSE	FALSE
NM_009974	282	246	13000	Csnk2a2	2.7396	2.39094	FALSE	FALSE
NM_012057	435	628	27056	Irf5	2.92784	2.79796	FALSE	FALSE
NM_134007	102	63	52637	Cisd1	2.29796	1.79934	FALSE	FALSE
NM_178854	77	49	231464	Cnot6l	2.17585	1.6902	FALSE	FALSE
NM_030251	23	12	80283	Abtb1	1.65108	1.07918	FALSE	FALSE
NM_001253813	235	115	105722	Ano6	2.66042	2.0607	FALSE	FALSE
NM_013634	49	32	19014	Med1	1.97955	1.50515	FALSE	FALSE
NM_026021	20	53	67187	Zmynd19	1.59039	1.72428	FALSE	FALSE
NM_001113346	128	139	234366	Gatad2a	2.39657	2.14301	FALSE	FALSE
NM_008612	175	108	17420	Mnat1	2.53239	2.03342	FALSE	FALSE
NM_153556	12	11	227099	Pms1	1.36854	1.04139	FALSE	FALSE
NM_177378	19	14	330812	Rnf150	1.56811	1.14613	FALSE	FALSE
NM_025828	434	412	66890	Lman2	2.92684	2.6149	FALSE	FALSE
NM_008142	744	790	14688	Gnb1	3.16093	2.89763	FALSE	FALSE
NM_175934	96	35	52040	Ppp1r10	2.27163	1.54407	FALSE	FALSE
NM_053124	198	175	93762	Smarca5	2.58602	2.24304	FALSE	FALSE
NM_001253714	175	108	110265	Msra	2.53239	2.03342	FALSE	FALSE
NM_001171052	101	72	116871	Mta3	2.29368	1.85733	FALSE	FALSE
NM_133943	184	115	101502	Hsd3b7	2.55417	2.0607	FALSE	FALSE
NM_030682	193	50	21897	Tlr1	2.57491	1.69897	FALSE	FALSE
NM_001097979_dup1	14523	4924	NA	NA	4.45141	3.69232	FALSE	FALSE
NM_001081203	86	53	243272	Sbno1	2.22385	1.72428	FALSE	FALSE
NM_009369	8656	4877	21810	Tgfbi	4.22667	3.68815	FALSE	FALSE
NM_019979	328	320	80795	Selk	2.80523	2.50515	FALSE	FALSE
NM_001160018	453	247	208263	Tor1aip1	2.94545	2.3927	FALSE	FALSE
NM_177464	84	48	52013	R3hcc1l	2.21363	1.68124	FALSE	FALSE
NM_001029977	63	97	214403	Gm4788	2.0887	1.98677	FALSE	FALSE
NM_026472	506	250	67949	Nifk	2.99351	2.39794	FALSE	FALSE
NM_011193	236	141	19200	Pstpip1	2.66227	2.14922	FALSE	FALSE
NM_001042527	27	19	12144	Blm	1.72072	1.27875	FALSE	FALSE
NM_027880	18	7	71718	Telo2	1.54463	1	FALSE	FALSE
NM_053090	63	19	84652	Fam126a	2.0887	1.27875	FALSE	FALSE
NM_144516	55	56	66505	Zmynd11	2.02972	1.74819	FALSE	FALSE
NM_178371	96	56	77031	Slc9a8	2.27163	1.74819	FALSE	FALSE
NM_001077189	2342	1238	14130	Fcgr2b	3.65894	3.09272	FALSE	FALSE
NM_001170341	299	120	30853	Mlf2	2.76503	2.07918	FALSE	FALSE
NM_013559	265	208	15505	Hsph1	2.7126	2.31806	FALSE	FALSE
NM_011386	518	259	20482	Skil	3.00368	2.4133	FALSE	FALSE
NM_001177674	12	0	238377	Gpr68	1.36854	1	FALSE	FALSE
NM_001039200	294	180	230866	Emc1	2.7577	2.25527	FALSE	FALSE
NM_001081382	12	14	72306	Zfp777	1.36854	1.14613	FALSE	FALSE
NM_025716	32	8	66701	Spryd4	1.79451	1	FALSE	FALSE
NM_001017983	15	22	239554	Foxred2	1.46545	1.34242	FALSE	FALSE
NM_010240	2441	2659	14325	Ftl1	3.67692	3.42472	FALSE	FALSE
NM_027264	34	43	69930	Zfp715	1.82083	1.63347	FALSE	FALSE
NM_178599	112	85	27784	Commd8	2.33857	1.92942	FALSE	FALSE
NM_030035	51	22	224139	Golgb1	1.99693	1.34242	FALSE	FALSE
NM_001081108	234	57	66096	Lamtor4	2.65857	1.75587	FALSE	FALSE
NM_011333	9458	4432	20296	Ccl2	4.26515	3.6466	FALSE	FALSE
NM_019711	23	31	56516	Rbms2	1.65108	1.49136	FALSE	FALSE
NM_001177601	45	47	104457	0610010K14Rik	1.94257	1.6721	FALSE	FALSE
NM_001033765	15	4	237880	1700071K01Rik	1.46545	1	FALSE	FALSE
NM_001205025	177	58	67767	Jagn1	2.53733	1.76343	FALSE	FALSE
NM_028140	54	42	72175	Mfsd8	2.02175	1.62325	FALSE	FALSE
NM_001111021	99	84	12394	Runx1	2.28499	1.92428	FALSE	FALSE
NM_008326	621	355	15944	Irgm1	3.08245	2.55023	FALSE	FALSE
NM_001048143	28	21	270096	Mon1b	1.73651	1.32222	FALSE	FALSE
NM_001079824	70	38	432467	Hnrnph3	2.13445	1.57978	FALSE	FALSE
NM_153398	38	22	268294	Zbtb24	1.86914	1.34242	FALSE	FALSE
NM_183225	24	20	329908	Usp24	1.66957	1.30103	FALSE	FALSE
NM_001037170	32	7	641376	Tomm40l	1.79451	1	FALSE	FALSE
NM_001033336	53	68	239273	Abcc4	2.01363	1.83251	FALSE	FALSE
NM_001161853	419	188	20587	Smarcb1	2.91157	2.27416	FALSE	FALSE
NM_175655	9381	3711	319157	Hist1h4f	4.2616	3.56949	FALSE	FALSE
NM_001163495	56	28	71085	Arhgap19	2.03754	1.44716	FALSE	FALSE
NM_001164274	40	25	29808	Mga	1.89142	1.39794	FALSE	FALSE
NM_027912	42	9	71767	Tysnd1	1.9126	1	FALSE	FALSE
NM_001110130	131	43	66101	Ppih	2.40663	1.63347	FALSE	FALSE
NM_001081319	19	20	226089	Ric1	1.56811	1.30103	FALSE	FALSE
NM_011791	153	122	23808	Ash2l	2.47405	2.08636	FALSE	FALSE
NM_001177708	145	73	228998	Arfgap1	2.45072	1.86332	FALSE	FALSE
NM_020575	190	170	57438	2016-03-07	2.56811	2.23045	FALSE	FALSE
NM_001039194	144	68	71361	Aifm2	2.44772	1.83251	FALSE	FALSE
NM_001033383	14	26	319748	Zfp865	1.43548	1.41497	FALSE	FALSE
NM_001159605	105	78	80912	Pum1	2.31054	1.89209	FALSE	FALSE
NM_001253390	38	11	67472	Mtfr1	1.86914	1.04139	FALSE	FALSE
NM_001255994	12	7	140629	Ubox5	1.36854	1	FALSE	FALSE
NM_001168371	101	103	71472	Usp19	2.29368	2.01284	FALSE	FALSE
NM_001141965	328	235	67877	Naa20	2.80523	2.37107	FALSE	FALSE
NM_134054	197	90	104725	Sptssa	2.58382	1.95424	FALSE	FALSE
NM_001165941	32	24	74455	Nsun6	1.79451	1.38021	FALSE	FALSE
NM_198027	78	16	233065	Alkbh6	2.18145	1.20412	FALSE	FALSE
NM_021536	79	80	59040	Rhot1	2.18698	1.90309	FALSE	FALSE
NM_013685	110	62	21413	Tcf4	2.33075	1.79239	FALSE	FALSE
NM_001199249	112	78	81601	Kat5	2.33857	1.89209	FALSE	FALSE
NM_019575	103	72	56214	Scamp4	2.30219	1.85733	FALSE	FALSE
NM_001128094	15	46	224088	Atp13a3	1.46545	1.66276	FALSE	FALSE
NM_001042408	79	47	27366	Txnl4a	2.18698	1.6721	FALSE	FALSE
NM_028207	343	113	72349	Dusp3	2.82465	2.05308	FALSE	FALSE
NM_001168537	22	15	71891	Cdadc1	1.63178	1.17609	FALSE	FALSE
NM_007561	38	16	12168	Bmpr2	1.86914	1.20412	FALSE	FALSE
NM_148934	95	40	110012	Tpgs1	2.26708	1.60206	FALSE	FALSE
NM_022432	251	96	64383	Sirt2	2.68903	1.98227	FALSE	FALSE
NM_025899	684	267	67003	Uqcrc2	3.12441	2.42651	FALSE	FALSE
NM_008133	892	398	14661	Glud1	3.23972	2.59988	FALSE	FALSE
NM_009192	395	58	20491	Sla	2.88595	1.76343	FALSE	FALSE
NM_001033457	35	14	433864	Nom1	1.83342	1.14613	FALSE	FALSE
NM_177594	121	88	210376	Mtmr9	2.37214	1.94448	FALSE	FALSE
NM_053195	12	10	94249	Slc24a3	1.36854	1	FALSE	FALSE
NM_013762	5041	2568	27367	Rpl3	3.99187	3.4096	FALSE	FALSE
NM_001034085	199	102	73699	Ppp2r1b	2.58821	2.0086	FALSE	FALSE
NM_172856	1089	560	241447	Cers6	3.32638	2.74819	FALSE	FALSE
NM_001142410	15	7	100216455	Gm14124	1.46545	1	FALSE	FALSE
NM_133990	39	50	16164	Il13ra1	1.88042	1.69897	FALSE	FALSE
NM_001161798	54	16	17769	Mthfr	2.02175	1.20412	FALSE	FALSE
NM_023871	1088	848	56086	Set	3.32598	2.9284	FALSE	FALSE
NM_134021	61	52	103711	Pnpo	2.07469	1.716	FALSE	FALSE
NM_029132	26	19	103268	Cep57l1	1.70433	1.27875	FALSE	FALSE
NM_009336	147	100	21427	Vps72	2.45667	2	FALSE	FALSE
NM_019926	163	58	17772	Mtm1	2.50154	1.76343	FALSE	FALSE
NM_018886	515	181	56048	Lgals8	3.00116	2.25768	FALSE	FALSE
NM_026403	80	86	67842	Nop9	2.19245	1.9345	FALSE	FALSE
NM_011841	16	9	23939	Mapk7	1.49348	1	FALSE	FALSE
NM_178766	18	18	319653	Slc25a40	1.54463	1.25527	FALSE	FALSE
NM_001110211	403	142	11749	Anxa6	2.89466	2.15229	FALSE	FALSE
NM_013847	59	29	26912	Gcat	2.06021	1.4624	FALSE	FALSE
NM_028658	186	192	73825	Ppp1r21	2.55887	2.2833	FALSE	FALSE
NM_013506	416	163	13682	Eif4a2	2.90845	2.21219	FALSE	FALSE
NM_145371	226	118	209354	Eif2b1	2.64346	2.07188	FALSE	FALSE
NM_153530	64	30	208718	Dis3l2	2.09554	1.47712	FALSE	FALSE
NM_172153	31	19	209707	Lcorl	1.78072	1.27875	FALSE	FALSE
NM_025802	154	120	66853	Pnpla2	2.47688	2.07918	FALSE	FALSE
NM_007987	215	205	14102	Fas	2.62179	2.31175	FALSE	FALSE
NM_026689	83	41	68350	Mul1	2.20843	1.61278	FALSE	FALSE
NM_001256195	40	44	230861	Eif4g3	1.89142	1.64345	FALSE	FALSE
NM_138757	35	13	71177	Asun	1.83342	1.11394	FALSE	FALSE
NM_145537	97	62	108687	Edem2	2.27613	1.79239	FALSE	FALSE
NM_009383	264	318	21843	Tial1	2.71096	2.50243	FALSE	FALSE
NM_019993	264	165	56752	Aldh9a1	2.71096	2.21748	FALSE	FALSE
NM_023538	83	34	69923	Agk	2.20843	1.53148	FALSE	FALSE
NM_025327	418	243	66059	Krtcap2	2.91053	2.38561	FALSE	FALSE
NM_001168304	34	39	78334	Cdk19	1.82083	1.59106	FALSE	FALSE
NM_001042501	82	58	68152	Fam133b	2.20317	1.76343	FALSE	FALSE
NM_026829	229	81	107885	Mthfs	2.64919	1.90849	FALSE	FALSE
NM_001243052	222	70	12036	Bcat2	2.63571	1.8451	FALSE	FALSE
NM_010631	4	13	16582	Kifc3	1	1.11394	FALSE	FALSE
NM_023268	110	69	104009	Qsox1	2.33075	1.83885	FALSE	FALSE
NM_008591	8	16	17295	Met	1.19245	1.20412	FALSE	FALSE
NM_021895	611	317	60595	Actn4	3.0754	2.50106	FALSE	FALSE
NM_029653	30	26	69635	Dapk1	1.76648	1.41497	FALSE	FALSE
NM_011218	25	19	19280	Ptprs	1.6873	1.27875	FALSE	FALSE
NM_021792	66	58	60440	Iigp1	2.1089	1.76343	FALSE	FALSE
NM_026612	332	60	68198	Ndufb2	2.81049	1.77815	FALSE	FALSE
NM_001164735	304	164	57914	Crlf2	2.77223	2.21484	FALSE	FALSE
NM_007514	371	252	11988	Slc7a2	2.85873	2.4014	FALSE	FALSE
NM_008186	67	33	14884	Gtf2h1	2.11543	1.51851	FALSE	FALSE
NM_145968	53	28	72536	Tagap	2.01363	1.44716	FALSE	FALSE
NM_011948	23	11	26407	Map3k4	1.65108	1.04139	FALSE	FALSE
NM_008876	35	35	18806	Pld2	1.83342	1.54407	FALSE	FALSE
NM_008717	95	59	18139	Zfml	2.26708	1.77085	FALSE	FALSE
NM_016800	121	69	53612	Vti1b	2.37214	1.83885	FALSE	FALSE
NM_001252542	66	31	78797	Ndor1	2.1089	1.49136	FALSE	FALSE
NM_178029	11	20	233904	Setd1a	1.33075	1.30103	FALSE	FALSE
NM_001033181	13	13	77532	Jrkl	1.4033	1.11394	FALSE	FALSE
NM_139206	81	35	106952	Arap3	2.19784	1.54407	FALSE	FALSE
NM_025770	58	14	66795	Atg10	2.05278	1.14613	FALSE	FALSE
NM_027817	159	94	71520	Grap	2.49075	1.97313	FALSE	FALSE
NM_011755	24	6	22694	Zfp35	1.66957	1	FALSE	FALSE
NM_172768	221	141	235283	Gramd1b	2.63375	2.14922	FALSE	FALSE
NM_146037	60	73	217826	Kcnk13	2.06751	1.86332	FALSE	FALSE
NM_001081122	12	9	28135	Cep63	1.36854	1	FALSE	FALSE
NM_133352	439	743	107358	Tm9sf3	2.93182	2.87099	FALSE	FALSE
NM_009088	126	64	20019	Polr1a	2.38973	1.80618	FALSE	FALSE
NM_013498	31	19	12916	Crem	1.78072	1.27875	FALSE	FALSE
NM_175268	25	14	77938	Fam53b	1.6873	1.14613	FALSE	FALSE
NM_001080749	132	67	14886	Gtf2i	2.40993	1.82607	FALSE	FALSE
NM_024214	546	662	67952	Tomm20	3.02655	2.82086	FALSE	FALSE
NM_001013367	270	122	105787	Prkaa1	2.72072	2.08636	FALSE	FALSE
NM_133886	40	15	100317	AU040320	1.89142	1.17609	FALSE	FALSE
NM_029738	43	28	76779	Cluap1	1.92282	1.44716	FALSE	FALSE
NM_174850	90	56	231830	Micall2	2.2436	1.74819	FALSE	FALSE
NM_029068	76	36	74718	Snx16	2.17017	1.5563	FALSE	FALSE
NM_001103181	13	24	68842	Tulp4	1.4033	1.38021	FALSE	FALSE
NM_016909	221	172	53424	Tsnax	2.63375	2.23553	FALSE	FALSE
NM_029998	46	63	77877	6030458C11Rik	1.95211	1.79934	FALSE	FALSE
NM_201239	394	149	58809	Rnase4	2.88485	2.17319	FALSE	FALSE
NM_028720	438	235	74022	Glyr1	2.93083	2.37107	FALSE	FALSE
NM_024180	136	103	66844	Ormdl2	2.42289	2.01284	FALSE	FALSE
NM_144875	29	14	226422	Rab29	1.75175	1.14613	FALSE	FALSE
NM_001010836	13	13	333654	Ppp1r13l	1.4033	1.11394	FALSE	FALSE
NM_181278	89	145	78521	B230219D22Rik	2.23875	2.16137	FALSE	FALSE
NM_011544	65	43	21406	Tcf12	2.10227	1.63347	FALSE	FALSE
NM_024261	59	43	73419	1700052N19Rik	2.06021	1.63347	FALSE	FALSE
NM_211357	180	69	14050	Eya3	2.54463	1.83885	FALSE	FALSE
NM_133833	12	31	13518	Dst	1.36854	1.49136	FALSE	FALSE
NM_008018	15	21	14218	Sh3pxd2a	1.46545	1.32222	FALSE	FALSE
NM_023480	21	6	68636	Fahd1	1.61157	1	FALSE	FALSE
NM_001242396	89	51	108829	Jmjd1c	2.23875	1.70757	FALSE	FALSE
NM_145630	54	57	236900	Pdk3	2.02175	1.75587	FALSE	FALSE
NM_011049	14	9	18555	Cdk16	1.43548	1	FALSE	FALSE
NM_001177546	14	14	667666	Zfp600	1.43548	1.14613	FALSE	FALSE
NM_001172093	55	24	76131	Depdc1a	2.02972	1.38021	FALSE	FALSE
NM_009457	906	630	22201	Uba1	3.24648	2.79934	FALSE	FALSE
NM_001025779	43	46	23834	Cdc6	1.92282	1.66276	FALSE	FALSE
NM_009228	10	14	20648	Snta1	1.28936	1.14613	FALSE	FALSE
NM_027192	30	36	69737	Ttl	1.76648	1.5563	FALSE	FALSE
NM_009097	187	100	20111	Rps6ka1	2.5612	2	FALSE	FALSE
NM_016888	204	153	53625	B3gnt2	2.59899	2.18469	FALSE	FALSE
NM_175277	24	38	78653	Bola3	1.66957	1.57978	FALSE	FALSE
NM_001081355	20	20	110593	Prdm2	1.59039	1.30103	FALSE	FALSE
NM_024203	58	32	67544	Fam120b	2.05278	1.50515	FALSE	FALSE
NM_001045540	162	129	620913	Gm12185	2.49887	2.11059	FALSE	FALSE
NM_133895	184	110	100561	Slc15a4	2.55417	2.04139	FALSE	FALSE
NM_001077707	49	30	268281	Shprh	1.97955	1.47712	FALSE	FALSE
NM_001024512	11	20	105428	Fam149b	1.33075	1.30103	FALSE	FALSE
NM_029077	236	92	74735	Trim14	2.66227	1.96379	FALSE	FALSE
NM_027448	14	8	75782	Lca5	1.43548	1	FALSE	FALSE
NM_001253848	103	64	104836	Cbll1	2.30219	1.80618	FALSE	FALSE
NM_001159317	99	96	16180	Il1rap	2.28499	1.98227	FALSE	FALSE
NM_001039150	4559	2380	12505	Cd44	3.94822	3.37658	FALSE	FALSE
NM_080461	3	12	140482	Zfp358	1	1.07918	FALSE	FALSE
NM_133792	621	240	192654	Pla2g15	3.08245	2.38021	FALSE	FALSE
NM_144800	213	84	211401	Mtss1	2.61773	1.92428	FALSE	FALSE
NM_025626	28	17	66540	Fam107b	1.73651	1.23045	FALSE	FALSE
NM_021385	97	87	58186	Rad18	2.27613	1.93952	FALSE	FALSE
NM_001010825	25	4	231630	Ficd	1.6873	1	FALSE	FALSE
NM_027534	72	37	70750	Kdsr	2.14669	1.5682	FALSE	FALSE
NM_001101804_dup2	140	57	NA	NA	2.43548	1.75587	FALSE	FALSE
NM_133918	101	51	100952	Emilin1	2.29368	1.70757	FALSE	FALSE
NM_022999	27	11	65116	Prrg2	1.72072	1.04139	FALSE	FALSE
NM_001102458	173	149	54375	Azin1	2.5274	2.17319	FALSE	FALSE
NM_001081258	33	14	381293	Kif14	1.80787	1.14613	FALSE	FALSE
NM_001039356	919	264	15361	Hmga1	3.25267	2.4216	FALSE	FALSE
NM_033575	12	7	93700	Pcdhgb2	1.36854	1	FALSE	FALSE
NM_207215	14	13	105689	Mycbp2	1.43548	1.11394	FALSE	FALSE
NM_133248	31	24	170823	Glmn	1.78072	1.38021	FALSE	FALSE
NM_016981	44	15	20544	Slc9a1	1.93281	1.17609	FALSE	FALSE
NM_146099	30	66	226178	Wbp1l	1.76648	1.81954	FALSE	FALSE
NM_027109	552	194	69537	Dnase1l1	3.03129	2.2878	FALSE	FALSE
NM_001145778	46	19	72739	Zkscan3	1.95211	1.27875	FALSE	FALSE
NM_025693	15	19	66664	Tmem41a	1.46545	1.27875	FALSE	FALSE
NM_027541	101	63	70767	Prpf3	2.29368	1.79934	FALSE	FALSE
NM_001033237	40	24	208146	Yeats2	1.89142	1.38021	FALSE	FALSE
NM_001113214	101	52	18286	Odf2	2.29368	1.716	FALSE	FALSE
NM_001177405_dup2	20	2	NA	NA	1.59039	1	FALSE	FALSE
NM_009462	81	45	22224	Usp10	2.19784	1.65321	FALSE	FALSE
NM_172777	79	33	236573	Gbp9	2.18698	1.51851	FALSE	FALSE
NM_146002	27	58	215160	Rhbdd2	1.72072	1.76343	FALSE	FALSE
NM_001162939	123	110	68048	Aen	2.37926	2.04139	FALSE	FALSE
NM_172584	74	57	217837	Itpk1	2.15859	1.75587	FALSE	FALSE
NM_026195	543	241	108147	Atic	3.02416	2.38202	FALSE	FALSE
NM_145573	128	59	232536	Mrps35	2.39657	1.77085	FALSE	FALSE
NM_011368	179	108	20416	Shc1	2.54221	2.03342	FALSE	FALSE
NM_026865	19	6	73635	Ptges3l	1.56811	1	FALSE	FALSE
NM_026340	65	31	67724	Pop1	2.10227	1.49136	FALSE	FALSE
NM_025363	61	24	66117	1110001J03Rik	2.07469	1.38021	FALSE	FALSE
NM_001168469	189	135	22192	Ube2m	2.56582	2.13033	FALSE	FALSE
NM_008906	5023	2678	19025	Ctsa	3.99032	3.42781	FALSE	FALSE
NM_001190800	166	117	234733	Ddx19b	2.50946	2.06819	FALSE	FALSE
NM_025433	687	261	66229	Rpl7l1	3.12631	2.41664	FALSE	FALSE
NM_001159883	20	11	56812	Dnajb2	1.59039	1.04139	FALSE	FALSE
NM_030116	140	77	78523	Mrpl9	2.43548	1.88649	FALSE	FALSE
NM_015801	15	11	50767	Pnpla6	1.46545	1.04139	FALSE	FALSE
NM_001136259	217	67	21968	Tom1	2.62581	1.82607	FALSE	FALSE
NM_173019	66	32	270198	Pfkfb4	2.1089	1.50515	FALSE	FALSE
NM_009145	1987	1251	20320	Nptn	3.58755	3.09726	FALSE	FALSE
NM_026546	56	22	68073	Fam173b	2.03754	1.34242	FALSE	FALSE
NM_145924	17	10	102920	Cenpi	1.5198	1	FALSE	FALSE
NM_009615	1123	765	11491	Adam17	3.33973	2.88366	FALSE	FALSE
NM_028427	25	48	73067	Tmem192	1.6873	1.68124	FALSE	FALSE
NM_008753	303	657	18245	Oaz1	2.7708	2.81757	FALSE	FALSE
NM_178065	37	13	68497	Arel1	1.85756	1.11394	FALSE	FALSE
NM_025994	2242	931	27984	Efhd2	3.63999	2.96895	FALSE	FALSE
NM_001163161	3478	1149	17474	Clec4d	3.83068	3.06032	FALSE	FALSE
NM_130454	43	13	170472	Recql5	1.92282	1.11394	FALSE	FALSE
NM_011221	106	69	19291	Purb	2.31466	1.83885	FALSE	FALSE
NM_001199205	84	161	70834	Spag9	2.21363	2.20683	FALSE	FALSE
NM_134151	187	149	107271	Yars	2.5612	2.17319	FALSE	FALSE
NM_028243	397	280	72461	Prcp	2.88815	2.44716	FALSE	FALSE
NM_001159595	78	71	72656	Ints8	2.18145	1.85126	FALSE	FALSE
NM_145951	27	15	209224	Enox2	1.72072	1.17609	FALSE	FALSE
NM_011971	1565	423	26446	Psmb3	3.48387	2.62634	FALSE	FALSE
NM_001083887	16	3	230577	Pars2	1.49348	1	FALSE	FALSE
NM_172203	38	24	237038	Nox1	1.86914	1.38021	FALSE	FALSE
NM_007763	1574	575	12925	Crip1	3.48636	2.75967	FALSE	FALSE
NM_173873	67	27	12725	Clcn3	2.11543	1.43136	FALSE	FALSE
NM_170591	239	91	71844	Nupl1	2.66775	1.95904	FALSE	FALSE
NM_011672	472	207	22230	Ufd1l	2.9633	2.31597	FALSE	FALSE
NM_008520	30	56	16998	Ltbp3	1.76648	1.74819	FALSE	FALSE
NM_001037758	44	31	12234	Btrc	1.93281	1.49136	FALSE	FALSE
NM_001110192	560	361	16331	Inpp5d	3.03754	2.55751	FALSE	FALSE
NM_028614	199	102	73699	Ppp2r1b	2.58821	2.0086	FALSE	FALSE
NM_025486	179	59	66320	Tmem208	2.54221	1.77085	FALSE	FALSE
NM_001039239	47	46	630579	Zfp808	1.96145	1.66276	FALSE	FALSE
NM_001198912	371	209	16800	Arhgef2	2.85873	2.32015	FALSE	FALSE
NM_173374	849	396	110809	Srsf1	3.21826	2.5977	FALSE	FALSE
NM_010860	4585	1066	17904	Myl6	3.95069	3.02776	FALSE	FALSE
NM_010561	139	55	16201	Ilf3	2.43237	1.74036	FALSE	FALSE
NM_001161369	171	146	268996	Ss18	2.52235	2.16435	FALSE	FALSE
NM_153152	315	87	224904	2410015M20Rik	2.78767	1.93952	FALSE	FALSE
NM_019456	1066	748	54519	Apbb1ip	3.31711	2.8739	FALSE	FALSE
NM_153783	36	17	212503	Paox	1.84566	1.23045	FALSE	FALSE
NM_029701	530	231	76687	Spcs3	3.01363	2.36361	FALSE	FALSE
NM_001130150	170	154	16801	Arhgef1	2.5198	2.18752	FALSE	FALSE
NM_001205173	42	43	212632	Iffo2	1.9126	1.63347	FALSE	FALSE
NM_027462	17	9	70560	Wars2	1.5198	1	FALSE	FALSE
NM_008054	24	35	14360	Fyn	1.66957	1.54407	FALSE	FALSE
NM_001253862	65	43	21406	Tcf12	2.10227	1.63347	FALSE	FALSE
NM_011179	18641	9234	19156	Psap	4.55982	3.96539	FALSE	FALSE
NM_001159331	21	7	67768	N6amt1	1.61157	1	FALSE	FALSE
NM_178357	9	11	194655	Klf11	1.2436	1.04139	FALSE	FALSE
NM_009787	506	349	12304	Pdia4	2.99351	2.54283	FALSE	FALSE
NM_027156	48	33	69663	Ddx51	1.9706	1.51851	FALSE	FALSE
NM_021499	24	30	59002	Wrap73	1.66957	1.47712	FALSE	FALSE
NM_026744	62	35	68499	Mrpl53	2.08175	1.54407	FALSE	FALSE
NM_053177	75	90	94178	Mcoln1	2.16442	1.95424	FALSE	FALSE
NM_001242943	74	21	100190996	Gm14436	2.15859	1.32222	FALSE	FALSE
NM_133932	75	66	101206	Tada3	2.16442	1.81954	FALSE	FALSE
NM_018868	370	292	55989	Nop58	2.85756	2.46538	FALSE	FALSE
NM_001024952	28	17	381305	Rc3h1	1.73651	1.23045	FALSE	FALSE
NM_001085500	78	24	217149	Cisd3	2.18145	1.38021	FALSE	FALSE
NM_008021	16	25	14235	Foxm1	1.49348	1.39794	FALSE	FALSE
NM_001042620	429	284	13204	Dhx15	2.92181	2.45332	FALSE	FALSE
NM_178788	18	18	320685	Dctd	1.54463	1.25527	FALSE	FALSE
NM_144549	190	218	211770	Trib1	2.56811	2.33846	FALSE	FALSE
NM_172724	36	10	231841	Brat1	1.84566	1	FALSE	FALSE
NM_146073	21	24	224454	Zdhhc14	1.61157	1.38021	FALSE	FALSE
NM_001109972	1208	270	20335	Sec61g	3.37142	2.43136	FALSE	FALSE
NM_153592	278	193	244373	Erlin2	2.7334	2.28556	FALSE	FALSE
NM_021402	136	203	140499	Ube2j2	2.42289	2.3075	FALSE	FALSE
NM_133756	188	82	74254	Gpn1	2.56351	1.91381	FALSE	FALSE
NM_001164072	323	148	21353	Tank	2.79856	2.17026	FALSE	FALSE
NM_028070	18	12	72041	Alkbh4	1.54463	1.07918	FALSE	FALSE
NM_025518	45	29	66369	Dus2	1.94257	1.4624	FALSE	FALSE
NM_133697	105	39	68552	Smim14	2.31054	1.59106	FALSE	FALSE
NM_175224	289	112	75624	Metap1	2.75025	2.04922	FALSE	FALSE
NM_001251833	25	9	93681	Zkscan8	1.6873	1	FALSE	FALSE
NM_026007	2929	1053	67160	Eef1g	3.75607	3.02243	FALSE	FALSE
NM_008638	302	193	17768	Mthfd2	2.76936	2.28556	FALSE	FALSE
NM_001098836	19	16	217218	Atxn7l3	1.56811	1.20412	FALSE	FALSE
NM_001170851	56	21	16633	Klra2	2.03754	1.32222	FALSE	FALSE
NM_008898	1566	838	18984	Por	3.48415	2.92324	FALSE	FALSE
NM_001163770	34	21	112403	Dxo	1.82083	1.32222	FALSE	FALSE
NM_001082974	23	11	415115	Neurl2	1.65108	1.04139	FALSE	FALSE
NM_175251	33	28	77044	Arid2	1.80787	1.44716	FALSE	FALSE
NM_011580	153	79	21825	Thbs1	2.47405	1.89763	FALSE	FALSE
NM_007644	404	370	12492	Scarb2	2.89574	2.5682	FALSE	FALSE
NM_145436	160	131	217232	Cdc27	2.49348	2.11727	FALSE	FALSE
NM_026520	27	39	68034	Fam122a	1.72072	1.59106	FALSE	FALSE
NM_153196	64	23	71336	Rbks	2.09554	1.36173	FALSE	FALSE
NM_001085492	18	6	68703	Rere	1.54463	1	FALSE	FALSE
NM_001025263	576	244	21985	Tpd52	3.04978	2.38739	FALSE	FALSE
NM_001161765	13	3	14263	Fmo5	1.4033	1	FALSE	FALSE
NM_153057	152	135	211548	Nomo1	2.4712	2.13033	FALSE	FALSE
NM_001110853	18	16	12916	Crem	1.54463	1.20412	FALSE	FALSE
NM_001164227	60	31	18181	Nrf1	2.06751	1.49136	FALSE	FALSE
NM_011603	62	25	237336	Tbpl1	2.08175	1.39794	FALSE	FALSE
NM_015759	240	85	30938	Fgd3	2.66957	1.92942	FALSE	FALSE
NM_146194	1278	1508	233489	Picalm	3.39589	3.1784	FALSE	FALSE
NM_172391	106	91	268390	Ahsa2	2.31466	1.95904	FALSE	FALSE
NM_007631	2312	882	12443	Ccnd1	3.65334	2.94547	FALSE	FALSE
NM_001163590	33	14	74732	Stx11	1.80787	1.14613	FALSE	FALSE
NM_145483	27	11	224585	Zfp160	1.72072	1.04139	FALSE	FALSE
NM_018730	1678	568	54217	Rpl36	3.51415	2.75435	FALSE	FALSE
NM_133198	208	74	110095	Pygl	2.60742	1.86923	FALSE	FALSE
NM_001163301	112	32	19302	Pex2	2.33857	1.50515	FALSE	FALSE
NM_011489	105	69	20851	Stat5b	2.31054	1.83885	FALSE	FALSE
NM_028782	110	28	74142	Lonp1	2.33075	1.44716	FALSE	FALSE
NM_001163019	57	44	97159	A430005L14Rik	2.04523	1.64345	FALSE	FALSE
NM_144897	307	181	246703	Apoa1bp	2.77649	2.25768	FALSE	FALSE
NM_146200	1201	498	56347	Eif3c	3.3689	2.69723	FALSE	FALSE
NM_001163451	6	15	30957	Mapk8ip3	1.06751	1.17609	FALSE	FALSE
NM_001136062	14	8	13808	Eno3	1.43548	1	FALSE	FALSE
NM_019737	98	96	56386	B4galt6	2.28058	1.98227	FALSE	FALSE
NM_001146296	169	133	56417	Adar	2.51724	2.12385	FALSE	FALSE
NM_145609	160	78	78100	Msantd4	2.49348	1.89209	FALSE	FALSE
NM_001177627	363	163	227659	Slc2a6	2.84926	2.21219	FALSE	FALSE
NM_007455	99	36	11766	Ap1g2	2.28499	1.5563	FALSE	FALSE
NM_016677	402	167	53602	Hpcal1	2.89358	2.22272	FALSE	FALSE
NM_028126	103	27	72149	Strada	2.30219	1.43136	FALSE	FALSE
NM_010774	12	13	17193	Mbd4	1.36854	1.11394	FALSE	FALSE
NM_029491	83	43	75964	Trappc8	2.20843	1.63347	FALSE	FALSE
NM_177730	79	68	242291	Impad1	2.18698	1.83251	FALSE	FALSE
NM_023422	14254	4837	68024	Hist1h2bc	4.44329	3.68458	FALSE	FALSE
NM_009578	166	165	22778	Ikzf1	2.50946	2.21748	FALSE	FALSE
NM_030084	176	103	78308	Gpr108	2.53487	2.01284	FALSE	FALSE
NM_011342	286	168	20333	Sec22b	2.74572	2.22531	FALSE	FALSE
NM_001085409	110	56	68428	Steap3	2.33075	1.74819	FALSE	FALSE
NM_001146223	165	54	66310	Dpy30	2.50684	1.73239	FALSE	FALSE
NM_001080389	92	49	13728	Mark2	2.25314	1.6902	FALSE	FALSE
NM_023646	188	121	83945	Dnaja3	2.56351	2.08279	FALSE	FALSE
NM_028193	27	36	72308	Brf1	1.72072	1.5563	FALSE	FALSE
NM_008960	43	98	19211	Pten	1.92282	1.99123	FALSE	FALSE
NM_001025586	111	54	75692	Nr2c2ap	2.33468	1.73239	FALSE	FALSE
NM_008379	752	372	16211	Kpnb1	3.16557	2.57054	FALSE	FALSE
NM_001123386	31	15	12593	Cdyl	1.78072	1.17609	FALSE	FALSE
NM_001035526	40	15	100317	AU040320	1.89142	1.17609	FALSE	FALSE
NM_145426	359	176	216760	Mfap3	2.84445	2.24551	FALSE	FALSE
NM_001037810	98	62	20737	Spn	2.28058	1.79239	FALSE	FALSE
NM_001163360	112	87	60530	Fignl1	2.33857	1.93952	FALSE	FALSE
NM_022880	175	207	63959	Slc29a1	2.53239	2.31597	FALSE	FALSE
NM_001163430	34	19	50721	Sirt6	1.82083	1.27875	FALSE	FALSE
NM_001110498	717	360	15976	Ifnar2	3.14487	2.5563	FALSE	FALSE
NM_001164109	72	77	18018	Nfatc1	2.14669	1.88649	FALSE	FALSE
NM_010492	11	9	15893	Ica1	1.33075	1	FALSE	FALSE
NM_001001983	75	65	224020	Pi4ka	2.16442	1.81291	FALSE	FALSE
NM_001037717	106	49	625098	Slc38a6	2.31466	1.6902	FALSE	FALSE
NM_001172069	54	14	71599	Senp8	2.02175	1.14613	FALSE	FALSE
NM_145138	115	70	217718	Nek9	2.35005	1.8451	FALSE	FALSE
NM_145220	84	45	216190	Appl2	2.21363	1.65321	FALSE	FALSE
NM_001024854	79	27	30056	Timm9	2.18698	1.43136	FALSE	FALSE
NM_010236	35	19	14287	Fpgs	1.83342	1.27875	FALSE	FALSE
NM_178589	20	16	94185	Tnfrsf21	1.59039	1.20412	FALSE	FALSE
NM_021364	877	346	23845	Clec5a	3.23235	2.53908	FALSE	FALSE
NM_011327	95	44	20280	Scp2	2.26708	1.64345	FALSE	FALSE
NM_001252615	13	5	53618	Fut8	1.4033	1	FALSE	FALSE
NM_028385	34	22	72895	Setd5	1.82083	1.34242	FALSE	FALSE
NM_001040395	20	16	68646	Nadk2	1.59039	1.20412	FALSE	FALSE
NM_010478	114	127	15511	Hspa1b	2.34626	2.1038	FALSE	FALSE
NM_001037762	82	68	66220	Zdhhc12	2.20317	1.83251	FALSE	FALSE
NM_028136	118	83	72162	Dhx36	2.36124	1.91908	FALSE	FALSE
NM_201391	782	512	18810	Plec	3.18256	2.70927	FALSE	FALSE
NM_010760	347	149	17149	Magoh	2.82968	2.17319	FALSE	FALSE
NM_027999	39	13	71909	Haus5	1.88042	1.11394	FALSE	FALSE
NM_008400	393	212	16408	Itgal	2.88375	2.32634	FALSE	FALSE
NM_138303	25	10	74766	Yipf2	1.6873	1	FALSE	FALSE
NM_011293	176	92	20022	Polr2j	2.53487	1.96379	FALSE	FALSE
NM_027739	80	55	14421	B4galnt1	2.19245	1.74036	FALSE	FALSE
NM_001033960	77	38	227800	Rabgap1	2.17585	1.57978	FALSE	FALSE
NM_027201	29	33	69752	Zfp511	1.75175	1.51851	FALSE	FALSE
NM_009564	14	13	22722	Zfp64	1.43548	1.11394	FALSE	FALSE
NM_001012305	2	13	277468	Slc39a12	1	1.11394	FALSE	FALSE
NM_001033308	334	158	230787	Themis2	2.8131	2.19866	FALSE	FALSE
NM_028778	57	37	74137	Nuak2	2.04523	1.5682	FALSE	FALSE
NM_001168668	86	50	67726	Fam114a2	2.22385	1.69897	FALSE	FALSE
NM_001161847	330	168	20393	Sgk1	2.80787	2.22531	FALSE	FALSE
NM_175645	36	68	233781	Xylt1	1.84566	1.83251	FALSE	FALSE
NM_001163485	2843	932	19946	Rpl30	3.74313	2.96942	FALSE	FALSE
NM_001168220	69	68	66356	Knop1	2.1282	1.83251	FALSE	FALSE
NM_001081011	235	81	14270	Srgap2	2.66042	1.90849	FALSE	FALSE
NM_146135	19	43	229615	Pias3	1.56811	1.63347	FALSE	FALSE
NM_001081309	49	40	75669	Pik3r4	1.97955	1.60206	FALSE	FALSE
NM_178633	13	27	77113	Klhl2	1.4033	1.43136	FALSE	FALSE
NM_001256130	143	67	93790	Nipa2	2.44469	1.82607	FALSE	FALSE
NM_172882	20	17	72145	Wdfy3	1.59039	1.23045	FALSE	FALSE
NM_009119	856	361	20220	Sap18	3.22183	2.55751	FALSE	FALSE
NM_019873	44	19	56299	Fkbpl	1.93281	1.27875	FALSE	FALSE
NM_019679	286	159	57778	Fmnl1	2.74572	2.2014	FALSE	FALSE
NM_008848	538	271	18729	Pira6	3.02014	2.43297	FALSE	FALSE
NM_028521	44	17	73373	Phospho2	1.93281	1.23045	FALSE	FALSE
NM_176987	11	15	319719	Simc1	1.33075	1.17609	FALSE	FALSE
NM_022332	63	36	64213	St7	2.0887	1.5563	FALSE	FALSE
NM_026174	26	31	67464	Entpd4	1.70433	1.49136	FALSE	FALSE
NM_025557	92	24	66425	Pcp4l1	2.25314	1.38021	FALSE	FALSE
NM_016876	792	361	53356	Eif3g	3.18808	2.55751	FALSE	FALSE
NM_001252574	23	18	228875	Slc35c2	1.65108	1.25527	FALSE	FALSE
NM_030560	107	51	80744	Cwc22	2.31874	1.70757	FALSE	FALSE
NM_030678	152	151	14936	Gys1	2.4712	2.17898	FALSE	FALSE
NM_001141975	332	200	72119	Tpx2	2.81049	2.30103	FALSE	FALSE
NM_027379	398	155	67420	Far1	2.88924	2.19033	FALSE	FALSE
NM_029632	171	85	76497	Ppp1r11	2.52235	1.92942	FALSE	FALSE
NM_177993	258	160	73389	Hbp1	2.70097	2.20412	FALSE	FALSE
NM_026040	85	55	67222	Srfbp1	2.21877	1.74036	FALSE	FALSE
NM_008677	1309	464	17972	Ncf4	3.40629	2.66652	FALSE	FALSE
NM_019565	20	19	56220	Zfp386	1.59039	1.27875	FALSE	FALSE
NM_009775	1314	476	12257	Tspo	3.40795	2.67761	FALSE	FALSE
NM_025889	9	15	66990	Tmem134	1.2436	1.17609	FALSE	FALSE
NM_023331	124	75	67308	Mrpl46	2.38278	1.87506	FALSE	FALSE
NM_177852	36	12	23856	Dido1	1.84566	1.07918	FALSE	FALSE
NM_013754	50	32	27356	Insl6	1.98833	1.50515	FALSE	FALSE
NM_181589	133	134	70466	Ckap2l	2.41321	2.1271	FALSE	FALSE
NM_025522	211	140	66375	Dhrs7	2.61364	2.14613	FALSE	FALSE
NM_178084	73	24	65964	Zak	2.15268	1.38021	FALSE	FALSE
NM_001025156	111	28	70829	Ccdc93	2.33468	1.44716	FALSE	FALSE
NM_026417	273	149	67864	Yipf4	2.72552	2.17319	FALSE	FALSE
NM_011851	34	32	23959	Nt5e	1.82083	1.50515	FALSE	FALSE
NM_001033537	27	20	320655	Pgap3	1.72072	1.30103	FALSE	FALSE
NM_001110201	270	170	77254	Yif1b	2.72072	2.23045	FALSE	FALSE
NM_001113356	27	13	667277	C1rb	1.72072	1.11394	FALSE	FALSE
NM_008602	19	27	17344	Pias2	1.56811	1.43136	FALSE	FALSE
NM_013538	107	171	14793	Cdca3	2.31874	2.233	FALSE	FALSE
NM_031181	216	141	83382	Siglece	2.62381	2.14922	FALSE	FALSE
NM_145361	30	16	208198	Btbd2	1.76648	1.20412	FALSE	FALSE
NM_153546	9	14	218121	Mboat1	1.2436	1.14613	FALSE	FALSE
NM_001159574	153	120	66899	Fip1l1	2.47405	2.07918	FALSE	FALSE
NM_177364	187	152	268396	Sh3pxd2b	2.5612	2.18184	FALSE	FALSE
NM_008152	229	77	14744	Gpr65	2.64919	1.88649	FALSE	FALSE
NM_001128170	57	31	74256	Cyld	2.04523	1.49136	FALSE	FALSE
NM_001253700	140	59	54351	Elp5	2.43548	1.77085	FALSE	FALSE
NM_198622	23	14	243529	H1fx	1.65108	1.14613	FALSE	FALSE
NM_080556	922	556	68059	Tm9sf2	3.25409	2.74507	FALSE	FALSE
NM_030692	362	260	83493	Sacm1l	2.84806	2.41497	FALSE	FALSE
NM_133665	77	72	17261	Mef2d	2.17585	1.85733	FALSE	FALSE
NM_026963	81	35	69151	Lzic	2.19784	1.54407	FALSE	FALSE
NM_009397	397	274	21929	Tnfaip3	2.88815	2.43775	FALSE	FALSE
NM_177470	128	59	52538	Acaa2	2.39657	1.77085	FALSE	FALSE
NM_001243064	239	101	12389	Cav1	2.66775	2.00432	FALSE	FALSE
NM_172132	64	36	193796	Kdm4b	2.09554	1.5563	FALSE	FALSE
NM_019770	578	692	56334	Tmed2	3.05128	2.84011	FALSE	FALSE
NM_001199004	66	101	27277	Golga5	2.1089	2.00432	FALSE	FALSE
NM_011521	3125	1271	20971	Sdc4	3.78421	3.10415	FALSE	FALSE
NM_133852	133	85	99412	Golga2	2.41321	1.92942	FALSE	FALSE
NM_134471	147	92	73804	Kif2c	2.45667	1.96379	FALSE	FALSE
NM_001081392	46	29	100019	Mdn1	1.95211	1.4624	FALSE	FALSE
NM_025706	246	109	66687	Tbc1d15	2.68029	2.03743	FALSE	FALSE
NM_010913	412	299	18044	Nfya	2.90425	2.47567	FALSE	FALSE
NM_027748	18	5	209361	Taf3	1.54463	1	FALSE	FALSE
NM_027270	153	70	69940	Exoc1	2.47405	1.8451	FALSE	FALSE
NM_009537	156	183	22632	Yy1	2.48248	2.26245	FALSE	FALSE
NM_026273	49	76	67609	4930453N24Rik	1.97955	1.88081	FALSE	FALSE
NM_001033713	401	397	17258	Mef2a	2.8925	2.59879	FALSE	FALSE
NM_001164192	163	58	17772	Mtm1	2.50154	1.76343	FALSE	FALSE
NM_001205053	45	85	81703	Jdp2	1.94257	1.92942	FALSE	FALSE
NM_027977	205	93	71881	Apmap	2.60111	1.96848	FALSE	FALSE
NM_001081378	77	29	77480	Kidins220	2.17585	1.4624	FALSE	FALSE
NM_001045525	28	11	327951	Cyb5d1	1.73651	1.04139	FALSE	FALSE
NM_001004140	94	99	80986	Ckap2	2.26248	1.99564	FALSE	FALSE
NM_001079830	26	23	94093	Trim33	1.70433	1.36173	FALSE	FALSE
NM_007683	110	70	12617	Cenpc1	2.33075	1.8451	FALSE	FALSE
NM_001164314	270	190	22375	Wars	2.72072	2.27875	FALSE	FALSE
NM_009542	20	6	22643	Zfp101	1.59039	1	FALSE	FALSE
NM_001012363	12	8	117591	Slc2a9	1.36854	1	FALSE	FALSE
NM_001033326	42	37	236082	Dhrsx	1.9126	1.5682	FALSE	FALSE
NM_013923	49	12	30945	Rnf19a	1.97955	1.07918	FALSE	FALSE
NM_028756	108	32	74102	Slc35a5	2.32278	1.50515	FALSE	FALSE
NM_001001176	65	32	407786	Taf9b	2.10227	1.50515	FALSE	FALSE
NM_029423	90	71	75767	Rab11fip1	2.2436	1.85126	FALSE	FALSE
NM_146153	295	198	230753	Thrap3	2.75918	2.29667	FALSE	FALSE
NM_025283	425	150	19070	Mob4	2.91774	2.17609	FALSE	FALSE
NM_138956	50	67	192678	Rassf3	1.98833	1.82607	FALSE	FALSE
NM_001039180	97	79	76895	Bicd2	2.27613	1.89763	FALSE	FALSE
NM_001204915	184	253	28193	Reep3	2.55417	2.40312	FALSE	FALSE
NM_001146084	50	42	380601	Fastkd5	1.98833	1.62325	FALSE	FALSE
NM_021337	100	27	108077	Skiv2l	2.28936	1.43136	FALSE	FALSE
NM_011396	31	18	20520	Slc22a5	1.78072	1.25527	FALSE	FALSE
NM_134040	311	173	104721	Ddx1	2.78212	2.23805	FALSE	FALSE
NM_029157	358	154	75062	Sf3a3	2.84324	2.18752	FALSE	FALSE
NM_178893	100	110	107684	Coro2a	2.28936	2.04139	FALSE	FALSE
NM_152817	66	29	74196	Ttc27	2.1089	1.4624	FALSE	FALSE
NM_021526	1153	544	59029	Psmd14	3.35118	2.7356	FALSE	FALSE
NM_009832	141	49	12454	Ccnk	2.43857	1.6902	FALSE	FALSE
NM_009713	48	39	11883	Arsa	1.9706	1.59106	FALSE	FALSE
NM_001128080	11	7	27027	Tspan32	1.33075	1	FALSE	FALSE
NM_177337	81	16	219144	Arl11	2.19784	1.20412	FALSE	FALSE
NM_173399	7	15	230119	Zbtb5	1.13445	1.17609	FALSE	FALSE
NM_199302	21	10	227738	Lrsam1	1.61157	1	FALSE	FALSE
NM_183046	45	55	240641	Kif20b	1.94257	1.74036	FALSE	FALSE
NM_001033155	70	70	70604	Dnajb14	2.13445	1.8451	FALSE	FALSE
NM_172569	35	26	217331	Unk	1.83342	1.41497	FALSE	FALSE
NM_007711	66	30	12725	Clcn3	2.1089	1.47712	FALSE	FALSE
NM_019936	155	104	56724	Cript	2.47969	2.01703	FALSE	FALSE
NM_026325	137	100	67706	Tmem179b	2.42608	2	FALSE	FALSE
NM_194257	61	34	109229	Fam118b	2.07469	1.53148	FALSE	FALSE
NM_020042	132	53	56738	Mocs1	2.40993	1.72428	FALSE	FALSE
NM_001165995	66	33	76688	Arfrp1	2.1089	1.51851	FALSE	FALSE
NM_001104529	24	12	64095	Gpr35	1.66957	1.07918	FALSE	FALSE
NM_001142923	84	68	21416	Tcf7l2	2.21363	1.83251	FALSE	FALSE
NM_172415	14	8	72754	Arhgef10l	1.43548	1	FALSE	FALSE
NM_001161410	90	48	217449	Trappc12	2.2436	1.68124	FALSE	FALSE
NM_001163531	56	16	72392	Tmem175	2.03754	1.20412	FALSE	FALSE
NM_015824	156	83	50793	Orc3	2.48248	1.91908	FALSE	FALSE
NM_001159552	285	152	14950	H13	2.7442	2.18184	FALSE	FALSE
NM_177342	21	8	226182	Taf5	1.61157	1	FALSE	FALSE
NM_025812	108	69	66867	Hmg20a	2.32278	1.83885	FALSE	FALSE
NM_001077696	40	37	15184	Hdac5	1.89142	1.5682	FALSE	FALSE
NM_026677	59	21	68328	Rab13	2.06021	1.32222	FALSE	FALSE
NM_029571	34	16	100087	Kti12	1.82083	1.20412	FALSE	FALSE
NM_020266	15	10	56812	Dnajb2	1.46545	1	FALSE	FALSE
NM_026127	38	10	67392	4833420G17Rik	1.86914	1	FALSE	FALSE
NM_145501	214	181	84095	Pi4k2a	2.61977	2.25768	FALSE	FALSE
NM_026390	361	276	67812	Ubxn4	2.84686	2.44091	FALSE	FALSE
NM_023524	48	7	69714	Tfpt	1.9706	1	FALSE	FALSE
NM_020491	110	31	56390	Sssca1	2.33075	1.49136	FALSE	FALSE
NM_025311	58	17	66039	Tmem254a	2.05278	1.23045	FALSE	FALSE
NM_175115	28	16	67143	Ikzf5	1.73651	1.20412	FALSE	FALSE
NM_025979	41	29	67121	Mastl	1.90214	1.4624	FALSE	FALSE
NM_011895	69	41	24060	Slc35a1	2.1282	1.61278	FALSE	FALSE
NM_025441	141	57	66244	Nemf	2.43857	1.75587	FALSE	FALSE
NM_009847	78	52	12488	Cd2ap	2.18145	1.716	FALSE	FALSE
NM_001252493	32	59	64291	Osbpl1a	1.79451	1.77085	FALSE	FALSE
NM_001143689	2358	1326	15015	H2-Q4	3.6619	3.12254	FALSE	FALSE
NM_026602	180	104	68183	Bcas2	2.54463	2.01703	FALSE	FALSE
NM_001252202	54	87	26921	Map4k4	2.02175	1.93952	FALSE	FALSE
NM_008866	353	137	18777	Lypla1	2.83713	2.13672	FALSE	FALSE
NM_175357	149	51	58799	Crbn	2.46254	1.70757	FALSE	FALSE
NM_012010	1265	575	26905	Eif2s3x	3.39145	2.75967	FALSE	FALSE
NM_001101430	66	35	69666	Psmg4	2.1089	1.54407	FALSE	FALSE
NM_001161739	31	24	170823	Glmn	1.78072	1.38021	FALSE	FALSE
NM_001252192	13	14	14048	Eya1	1.4033	1.14613	FALSE	FALSE
NM_001042421	48	29	208628	Kntc1	1.9706	1.4624	FALSE	FALSE
NM_177038	83	43	75964	Trappc8	2.20843	1.63347	FALSE	FALSE
NM_028222	150	56	72391	Cdkn3	2.46545	1.74819	FALSE	FALSE
NM_001163557	54	30	19024	Ppfibp2	2.02175	1.47712	FALSE	FALSE
NM_177320	331	244	320207	Pik3r5	2.80918	2.38739	FALSE	FALSE
NM_026592	42	14	68170	B230118H07Rik	1.9126	1.14613	FALSE	FALSE
NM_001033472	40	14	382252	A830080D01Rik	1.89142	1.14613	FALSE	FALSE
NM_010269	46	23	14547	Gdap2	1.95211	1.36173	FALSE	FALSE
NM_183033	19	9	329003	Zfp516	1.56811	1	FALSE	FALSE
NM_172833	204	170	240354	Malt1	2.59899	2.23045	FALSE	FALSE
NM_153164	55	48	234594	Cnot1	2.02972	1.68124	FALSE	FALSE
NM_172262	20	12	218214	Kdm1b	1.59039	1.07918	FALSE	FALSE
NM_145567	251	129	58875	Hibadh	2.68903	2.11059	FALSE	FALSE
NM_001252585	135	60	228880	Zmynd8	2.41969	1.77815	FALSE	FALSE
NM_026875	17	43	66090	Ypel3	1.5198	1.63347	FALSE	FALSE
NM_009353	48	43	21750	Terf2	1.9706	1.63347	FALSE	FALSE
NM_019943	14	21	56522	Papolb	1.43548	1.32222	FALSE	FALSE
NM_001160040	285	154	227197	Ndufs1	2.7442	2.18752	FALSE	FALSE
NM_207634	4410	1548	20088	Rps24	3.93379	3.18977	FALSE	FALSE
NM_025377	85	46	66140	Ska2	2.21877	1.66276	FALSE	FALSE
NM_001165986	410	225	74383	Ubap2l	2.90214	2.35218	FALSE	FALSE
NM_013862	17	11	29809	Rabgap1l	1.5198	1.04139	FALSE	FALSE
NM_025427	24	6	66214	Rgcc	1.66957	1	FALSE	FALSE
NM_013563	1932	1065	16186	Il2rg	3.57536	3.02735	FALSE	FALSE
NM_172406	32	10	70827	Trak2	1.79451	1	FALSE	FALSE
NM_015811	709	328	50778	Rgs1	3.14	2.51587	FALSE	FALSE
NM_018782	739	344	54598	Calcrl	3.158	2.53656	FALSE	FALSE
NM_001145900	3	12	399566	Btbd6	1	1.07918	FALSE	FALSE
NM_001122873	205	82	69459	Ubl7	2.60111	1.91381	FALSE	FALSE
NM_026660	138	148	68294	Mfsd10	2.42923	2.17026	FALSE	FALSE
NM_001252260	3385	1442	18148	Npm1	3.81891	3.15897	FALSE	FALSE
NM_009155	1060	542	20363	Sepp1	3.31466	2.734	FALSE	FALSE
NM_026578	120	76	68147	Gar1	2.36854	1.88081	FALSE	FALSE
NM_019635	182	124	56274	Stk3	2.54943	2.09342	FALSE	FALSE
NM_173441	107	92	73473	Iws1	2.31874	1.96379	FALSE	FALSE
NM_026130	405	508	67398	Srpr	2.89681	2.70586	FALSE	FALSE
NM_145512	107	42	108735	Sft2d2	2.31874	1.62325	FALSE	FALSE
NM_025593	226	77	66491	Polr2l	2.64346	1.88649	FALSE	FALSE
NM_001252530	28	23	101488	Slco2b1	1.73651	1.36173	FALSE	FALSE
NM_025302	158	111	27398	Mrpl2	2.48801	2.04532	FALSE	FALSE
NM_175106	25	6	66343	Tmem177	1.6873	1	FALSE	FALSE
NM_172288	85	34	234865	Nup133	2.21877	1.53148	FALSE	FALSE
NM_007481	512	288	11845	Arf6	2.99863	2.45939	FALSE	FALSE
NM_172958	18	26	268783	Mtmr12	1.54463	1.41497	FALSE	FALSE
NM_177782	156	78	277360	Prex1	2.48248	1.89209	FALSE	FALSE
NM_011886	134	170	24045	Scamp3	2.41646	2.23045	FALSE	FALSE
NM_031156	183	165	15925	Ide	2.55181	2.21748	FALSE	FALSE
NM_027335	213	142	70153	2210016F16Rik	2.61773	2.15229	FALSE	FALSE
NM_013888	85	50	30045	Dnajc12	2.21877	1.69897	FALSE	FALSE
NM_011231	151	72	19352	Rabggtb	2.46833	1.85733	FALSE	FALSE
NM_178408	124	48	215705	Arrdc1	2.38278	1.68124	FALSE	FALSE
NM_134141	244	119	109006	Ciapin1	2.67675	2.07555	FALSE	FALSE
NM_178930	97	46	107338	Gbf1	2.27613	1.66276	FALSE	FALSE
NM_145479	23	14	224023	Klhl22	1.65108	1.14613	FALSE	FALSE
NM_018768	257	90	55943	Stx8	2.69929	1.95424	FALSE	FALSE
NM_007948	113	47	13870	Ercc1	2.34243	1.6721	FALSE	FALSE
NM_145941	332	161	208643	Eif4g1	2.81049	2.20683	FALSE	FALSE
NM_011961	24	18	26432	Plod2	1.66957	1.25527	FALSE	FALSE
NM_019680	125	91	56501	Elf4	2.38627	1.95904	FALSE	FALSE
NM_008813	46	22	18605	Enpp1	1.95211	1.34242	FALSE	FALSE
NM_013710	11	6	26382	Fgd2	1.33075	1	FALSE	FALSE
NM_008732	327	189	18174	Slc11a2	2.8039	2.27646	FALSE	FALSE
NM_010122	89	39	13667	Eif2b4	2.23875	1.59106	FALSE	FALSE
NM_001167885	34	15	225888	Suv420h1	1.82083	1.17609	FALSE	FALSE
NM_173867	201	138	108911	Rcc2	2.59255	2.13988	FALSE	FALSE
NM_152800	81	81	30933	Tor2a	2.19784	1.90849	FALSE	FALSE
NM_001079904	7	18	58887	Repin1	1.13445	1.25527	FALSE	FALSE
NM_212438	13	25	22404	Wiz	1.4033	1.39794	FALSE	FALSE
NM_001037937	11	9	97998	Deptor	1.33075	1	FALSE	FALSE
NM_001005864	7	12	102103	Mtus1	1.13445	1.07918	FALSE	FALSE
NM_178691	24	15	226418	Yod1	1.66957	1.17609	FALSE	FALSE
NM_175511	22	11	241303	Fam78a	1.63178	1.04139	FALSE	FALSE
NM_001163706	83	56	50762	Fbxo6	2.20843	1.74819	FALSE	FALSE
NM_199221	531	451	217304	Cd300lb	3.01445	2.65418	FALSE	FALSE
NM_001093760	259	89	66975	Trappc13	2.70265	1.94939	FALSE	FALSE
NM_019468	230	99	14380	G6pd2	2.65108	1.99564	FALSE	FALSE
NM_009498	212	63	22319	Vamp3	2.61569	1.79934	FALSE	FALSE
NM_029711	4702	3618	76709	Arpc2	3.96164	3.55847	FALSE	FALSE
NM_001177750	51	16	100038538	Gm10767	1.99693	1.20412	FALSE	FALSE
NM_001114087	42	39	67399	Pdlim7	1.9126	1.59106	FALSE	FALSE
NM_153403	19	43	236511	Ago1	1.56811	1.63347	FALSE	FALSE
NM_027168	47	26	69692	Hddc2	1.96145	1.41497	FALSE	FALSE
NM_025636	85	29	66566	Ntpcr	2.21877	1.4624	FALSE	FALSE
NM_001253920	67	30	67605	Akt1s1	2.11543	1.47712	FALSE	FALSE
NM_011015	13	17	18392	Orc1	1.4033	1.23045	FALSE	FALSE
NM_001102444	246	196	11518	Add1	2.68029	2.29226	FALSE	FALSE
NM_001114609	18	20	227195	Ino80d	1.54463	1.30103	FALSE	FALSE
NM_021272	40	23	12140	Fabp7	1.89142	1.36173	FALSE	FALSE
NM_008031	55	79	14265	Fmr1	2.02972	1.89763	FALSE	FALSE
NM_001079694	476	274	20384	Srsf5	2.96696	2.43775	FALSE	FALSE
NM_194341	44	51	217030	Synrg	1.93281	1.70757	FALSE	FALSE
NM_010306	741	499	14679	Gnai3	3.15917	2.6981	FALSE	FALSE
NM_144559	157	75	246256	Fcgr4	2.48525	1.87506	FALSE	FALSE
NM_001243161	111	63	207958	Alg11	2.33468	1.79934	FALSE	FALSE
NM_146067	109	53	223978	Cpped1	2.32678	1.72428	FALSE	FALSE
NM_009289	128	191	20874	Slk	2.39657	2.28103	FALSE	FALSE
NM_021434	24	43	58245	Gpr180	1.66957	1.63347	FALSE	FALSE
NM_001145881	17	13	232784	Zfp212	1.5198	1.11394	FALSE	FALSE
NM_133768	285	89	109900	Asl	2.7442	1.94939	FALSE	FALSE
NM_026721	69	68	68427	Slc39a13	2.1282	1.83251	FALSE	FALSE
NM_001033201	134	131	433702	Ncbp1	2.41646	2.11727	FALSE	FALSE
NM_028006	15	8	71924	Tube1	1.46545	1	FALSE	FALSE
NM_178242	16	6	231861	Tnrc18	1.49348	1	FALSE	FALSE
NM_019482	24	26	55991	Panx1	1.66957	1.41497	FALSE	FALSE
NM_001113518	639	234	54126	Arhgef7	3.09486	2.36922	FALSE	FALSE
NM_001190436	3312	1023	14109	Fau	3.80945	3.00988	FALSE	FALSE
NM_172741	20	12	233103	4931406P16Rik	1.59039	1.07918	FALSE	FALSE
NM_001162415	47	22	18640	Pfkfb2	1.96145	1.34242	FALSE	FALSE
NM_027182	65	47	69716	Trip13	2.10227	1.6721	FALSE	FALSE
NM_001083318	166	128	27049	Etv3	2.50946	2.10721	FALSE	FALSE
NM_001168497	102	56	70310	Plscr3	2.29796	1.74819	FALSE	FALSE
NM_001163618	55	48	71807	Tars2	2.02972	1.68124	FALSE	FALSE
NM_008916	134	108	19062	Inpp5k	2.41646	2.03342	FALSE	FALSE
NM_172693	13	10	230145	Galnt12	1.4033	1	FALSE	FALSE
NM_025935	44	28	67046	Tbc1d7	1.93281	1.44716	FALSE	FALSE
NM_008369	96	84	16188	Il3ra	2.27163	1.92428	FALSE	FALSE
NM_023230	541	159	66589	Ube2v1	3.02255	2.2014	FALSE	FALSE
NM_009883	1094	857	12608	Cebpb	3.32837	2.93298	FALSE	FALSE
NM_011240	166	121	19386	Ranbp2	2.50946	2.08279	FALSE	FALSE
NM_175090	1086	267	20529	Slc31a1	3.32519	2.42651	FALSE	FALSE
NM_026556	155	108	68097	Dynll2	2.47969	2.03342	FALSE	FALSE
NM_145930	37	23	106064	AW549877	1.85756	1.36173	FALSE	FALSE
NM_009663	2464	888	11690	Alox5ap	3.681	2.94841	FALSE	FALSE
NM_019653	429	306	78889	Wsb1	2.92181	2.48572	FALSE	FALSE
NM_028411	34	7	72982	Tmem138	1.82083	1	FALSE	FALSE
NM_001033379	16	9	319618	Dcp1b	1.49348	1	FALSE	FALSE
NM_016722	291	179	50917	Galns	2.75325	2.25285	FALSE	FALSE
NM_028341	20	25	72747	Ttc39c	1.59039	1.39794	FALSE	FALSE
NM_001163687	87	48	67111	Naaa	2.22887	1.68124	FALSE	FALSE
NM_027353	174	68	70233	Cd2bp2	2.5299	1.83251	FALSE	FALSE
NM_015749	455	321	21452	Tcn2	2.94737	2.50651	FALSE	FALSE
NM_080848	215	163	140858	Wdr5	2.62179	2.21219	FALSE	FALSE
NM_172381	155	88	230249	AI314180	2.47969	1.94448	FALSE	FALSE
NM_001198977	654	221	20963	Syk	3.10493	2.34439	FALSE	FALSE
NM_007621	171	50	12409	Cbr2	2.52235	1.69897	FALSE	FALSE
NM_145497	12	5	225994	Nmrk1	1.36854	1	FALSE	FALSE
NM_001163311	11	6	27364	Srr	1.33075	1	FALSE	FALSE
NM_001166630_dup1	777	216	NA	NA	3.17978	2.33445	FALSE	FALSE
NM_011499	480	585	20901	Strap	2.9706	2.76716	FALSE	FALSE
NM_010500	274	117	15939	Ier5	2.72711	2.06819	FALSE	FALSE
NM_153137	28	13	215243	Traf3ip3	1.73651	1.11394	FALSE	FALSE
NM_199056	32	22	75678	Ippk	1.79451	1.34242	FALSE	FALSE
NM_001163441	68	32	17454	Mov10	2.12186	1.50515	FALSE	FALSE
NM_001136054	156	92	11907	Ate1	2.48248	1.96379	FALSE	FALSE
NM_001110832	318	249	18044	Nfya	2.79178	2.3962	FALSE	FALSE
NM_145619	106	55	235587	Parp3	2.31466	1.74036	FALSE	FALSE
NM_011662	2737	1332	22177	Tyrobp	3.72663	3.1245	FALSE	FALSE
NM_028118	17	5	72137	Wdsub1	1.5198	1	FALSE	FALSE
NM_145149	30	48	233046	Rasgrp4	1.76648	1.68124	FALSE	FALSE
NM_001166635	130	33	68041	Mid1ip1	2.4033	1.51851	FALSE	FALSE
NM_175025	68	59	235574	Atp2c1	2.12186	1.77085	FALSE	FALSE
NM_181066	36	10	231841	Brat1	1.84566	1	FALSE	FALSE
NM_011424	55	42	20602	Ncor2	2.02972	1.62325	FALSE	FALSE
NM_153142	116	96	103710	Slc35e4	2.35381	1.98227	FALSE	FALSE
NM_145985	542	468	213827	Arcn1	3.02335	2.67025	FALSE	FALSE
NM_172590	110	93	218460	Wdr41	2.33075	1.96848	FALSE	FALSE
NM_001164422	106	56	66943	Pqlc1	2.31466	1.74819	FALSE	FALSE
NM_173430	13	6	243853	Fkrp	1.4033	1	FALSE	FALSE
NM_001099349_dup5	166	64	NA	NA	2.50946	1.80618	FALSE	FALSE
NM_027472	43	22	70591	5730455P16Rik	1.92282	1.34242	FALSE	FALSE
NM_001253872	393	212	16408	Itgal	2.88375	2.32634	FALSE	FALSE
NM_026444	1124	408	12974	Cs	3.34012	2.61066	FALSE	FALSE
NM_011187	1518	458	19177	Psmb7	3.47063	2.66087	FALSE	FALSE
NM_178729	42	57	242960	Fbxl5	1.9126	1.75587	FALSE	FALSE
NM_013651	339	173	20222	Sf3a2	2.81955	2.23805	FALSE	FALSE
NM_028864	207	166	78781	Zc3hav1	2.60533	2.22011	FALSE	FALSE
NM_144528	50	126	70294	Rnf126	1.98833	2.10037	FALSE	FALSE
NM_172785	133	35	237256	Zc3h12d	2.41321	1.54407	FALSE	FALSE
NM_013549	8761	3257	15267	Hist2h2aa1	4.23191	3.51282	FALSE	FALSE
NM_030700	102	41	80884	Maged2	2.29796	1.61278	FALSE	FALSE
NM_001081183	97	53	66185	1110037F02Rik	2.27613	1.72428	FALSE	FALSE
NM_001033270	473	306	218756	Slc4a7	2.96422	2.48572	FALSE	FALSE
NM_175285	31	25	96957	Tmem62	1.78072	1.39794	FALSE	FALSE
NM_022314	4136	1247	59069	Tpm3	3.90594	3.09587	FALSE	FALSE
NM_016858	33	19	19338	Rab33b	1.80787	1.27875	FALSE	FALSE
NM_178794	12	6	22184	Zrsr2	1.36854	1	FALSE	FALSE
NM_172730	50	33	232236	Ccdc174	1.98833	1.51851	FALSE	FALSE
NM_027498	37	45	70661	Sik3	1.85756	1.65321	FALSE	FALSE
NM_138664	11	5	246738	Dnajc28	1.33075	1	FALSE	FALSE
NM_001253898	37	14	26940	Ecsit	1.85756	1.14613	FALSE	FALSE
NM_001081406	22	13	69706	Lrr1	1.63178	1.11394	FALSE	FALSE
NM_153582	12	5	97487	Cmtm4	1.36854	1	FALSE	FALSE
NM_029975	214	110	77777	Ulbp1	2.61977	2.04139	FALSE	FALSE
NM_021412	126	99	58223	Mmp19	2.38973	1.99564	FALSE	FALSE
NM_133746	53	27	72691	Calhm2	2.01363	1.43136	FALSE	FALSE
NM_175560	38	33	269997	Zfp747	1.86914	1.51851	FALSE	FALSE
NM_001164062	116	67	20850	Stat5a	2.35381	1.82607	FALSE	FALSE
NM_008839	21	36	18706	Pik3ca	1.61157	1.5563	FALSE	FALSE
NM_025504	40	10	66349	Atp5sl	1.89142	1	FALSE	FALSE
NM_001013755	32	19	230757	5730409E04Rik	1.79451	1.27875	FALSE	FALSE
NM_001243239	22	6	381356	Cacfd1	1.63178	1	FALSE	FALSE
NM_001080773	85	88	18607	Pdpk1	2.21877	1.94448	FALSE	FALSE
NM_001184709	6	15	211586	Tfdp2	1.06751	1.17609	FALSE	FALSE
NM_177184	50	30	320528	Vps13c	1.98833	1.47712	FALSE	FALSE
NM_030609	1588	708	80838	Hist1h1a	3.49021	2.85003	FALSE	FALSE
NM_029760	42	24	76826	Nubpl	1.9126	1.38021	FALSE	FALSE
[truncated: 10,922 more rows]

## Sheet: analyze-runoff-data-7flaA.csv
	7flaA.untr	7flaA.harr	EG	Symbol	untrNormLog10	harrNormLog10	isCytokine-related	isHousekeeping
NM_007652	40	7	12509	Cd59a	2.02474	1.52483	FALSE	FALSE
NM_020567	134	34	57441	Gmnn	2.54978	2.21121	FALSE	FALSE
NM_001159617	23	13	56176	Pigp	1.7844	1.79368	FALSE	FALSE
NM_001037812	72	20	381259	Tmem237	2.28001	1.98076	FALSE	FALSE
NM_022882	73	19	64898	Lpin2	2.286	1.95849	FALSE	FALSE
NM_001198823	3685	801	11820	App	3.98911	3.58336	FALSE	FALSE
NM_001163432	53	24	12748	Clk2	2.14695	2.05994	FALSE	FALSE
NM_001080968	156	35	99412	Golga2	2.6158	2.2238	FALSE	FALSE
NM_153063	21	7	224691	Zfp472	1.7449	1.52483	FALSE	FALSE
NM_019798	22	10	18577	Pde4a	1.7651	1.67973	FALSE	FALSE
NM_011509	157	19	100041294	Gm3258	2.61858	1.95849	FALSE	FALSE
NM_001040111	160	63	69710	Arap1	2.6268	2.47907	FALSE	FALSE
NM_133186	80	24	68428	Steap3	2.32577	2.05994	FALSE	FALSE
NM_010234	1158	318	14281	Fos	3.48639	3.18216	FALSE	FALSE
NM_172541	142	95	215210	Tmem120a	2.57497	2.65746	FALSE	FALSE
NM_024448	325	68	19328	Rab12	2.93456	2.51224	FALSE	FALSE
NM_021366	116	26	50794	Klf13	2.48714	2.09471	FALSE	FALSE
NM_001136070	39	4	16865	Eif2d	2.01374	1.28179	FALSE	FALSE
NM_019703	315	65	56421	Pfkp	2.92099	2.49265	FALSE	FALSE
NM_026217	171	19	67526	Atg12	2.65567	1.95849	FALSE	FALSE
NM_001029842	37	19	104681	Slc16a6	1.99088	1.95849	FALSE	FALSE
NM_001168297	42	12	71865	Fbxo30	2.04593	1.75891	FALSE	FALSE
NM_001040397	41	78	78749	Filip1l	2.03546	2.57183	FALSE	FALSE
NM_007421	273	75	11565	Adssl1	2.85884	2.55479	FALSE	FALSE
NM_173748	130	26	209586	Nudcd3	2.53662	2.09471	FALSE	FALSE
NM_201393	610	286	18810	Plec	3.20801	3.1361	FALSE	FALSE
NM_008402	2728	827	16410	Itgav	3.85852	3.59724	FALSE	FALSE
NM_033596	3157	380	97122	Hist2h4	3.92195	3.25952	FALSE	FALSE
NM_001008542	104	15	17859	Mxi1	2.43971	1.85582	FALSE	FALSE
NM_011291	4871	917	19989	Rpl7	4.1103	3.6421	FALSE	FALSE
NM_001033962	221	39	22215	Ube3a	2.76707	2.2708	FALSE	FALSE
NM_011400	966	253	20525	Slc2a1	3.40765	3.08285	FALSE	FALSE
NM_027203	132	26	69757	Leng1	2.54325	2.09471	FALSE	FALSE
NM_001166457	234	49	210766	Brcc3	2.79189	2.36993	FALSE	FALSE
NM_001161845	350	82	20393	Sgk1	2.96675	2.59355	FALSE	FALSE
NM_007807	8333	1922	13058	Cybb	4.34348	3.96349	FALSE	FALSE
NM_001170537	239	54	17260	Mef2c	2.80107	2.41213	FALSE	FALSE
NM_001083334	288	133	30948	Bin1	2.88207	2.80358	FALSE	FALSE
NM_001205082	161	59	20778	Scarb1	2.6295	2.45058	FALSE	FALSE
NM_001025594	32	13	71834	Zbtb43	1.92783	1.79368	FALSE	FALSE
NM_025951	34	6	67073	Pi4k2b	1.95416	1.45788	FALSE	FALSE
NM_008385	52	14	16330	Inpp5b	2.13868	1.82586	FALSE	FALSE
NM_001003950	17	2	216363	Rab3ip	1.65313	1	FALSE	FALSE
NM_001102613	21	0	232970	Phldb3	1.7449	1	FALSE	FALSE
NM_001081013	39	12	109263	Rlf	2.01374	1.75891	FALSE	FALSE
NM_029447	84	23	75805	Nln	2.34696	2.04146	FALSE	FALSE
NM_001256132	166	33	93790	Nipa2	2.64279	2.19825	FALSE	FALSE
NM_028523	116	32	73379	Dcbld2	2.48714	2.18488	FALSE	FALSE
NM_026176	244	42	67466	Pdcl	2.81007	2.30298	FALSE	FALSE
NM_025555	39	6	66421	2410004B18Rik	2.01374	1.45788	FALSE	FALSE
NM_010119	1673	627	13660	Ehd1	3.64617	3.477	FALSE	FALSE
NM_001083958	19	3	72611	Zfp655	1.70143	1.15685	FALSE	FALSE
NM_001141977	369	78	72119	Tpx2	2.9897	2.57183	FALSE	FALSE
NM_172606	211	64	223455	2016-03-06	2.74696	2.48591	FALSE	FALSE
NM_026042	324	58	67224	Med29	2.93322	2.44316	FALSE	FALSE
NM_019567	283	107	56215	Acin1	2.87446	2.70912	FALSE	FALSE
NM_009777	10072	2295	12260	C1qb	4.42579	4.04051	FALSE	FALSE
NM_031868	1100	364	19045	Ppp1ca	3.46407	3.24083	FALSE	FALSE
NM_001164792	16	6	21983	Tpbg	1.6268	1.45788	FALSE	FALSE
NM_007573	481	119	12261	C1qbp	3.10482	2.75528	FALSE	FALSE
NM_001033449	73	17	381259	Tmem237	2.286	1.91018	FALSE	FALSE
NM_053187	154	51	94221	Gopc	2.6102	2.3873	FALSE	FALSE
NM_001034097	51	34	619441	Tnfsf12Tnfsf13	2.13025	2.21121	FALSE	FALSE
NM_025520	126	21	66373	Lsm5	2.52305	2.00195	FALSE	FALSE
NM_175306	41	23	100169	Phactr4	2.03546	2.04146	FALSE	FALSE
NM_001171035	4497	782	110213	Tmbim6	4.0756	3.57294	FALSE	FALSE
NM_199476	39	8	382985	Rrm2b	2.01374	1.58282	FALSE	FALSE
NM_172259	270	25	216459	Myl6b	2.85404	2.07767	FALSE	FALSE
NM_134033	43	14	104479	Ccdc117	2.05615	1.82586	FALSE	FALSE
NM_001033535	30	1	244882	Tnfaip8l3	1.8998	1	FALSE	FALSE
NM_001122596	121	19	213438	A630033H20Rik	2.50546	1.95849	FALSE	FALSE
NM_172989	84	18	14745	Lpar1	2.34696	1.935	FALSE	FALSE
NM_028835	80	27	74244	Atg7	2.32577	2.1111	FALSE	FALSE
NM_001113354	67	25	320595	Phf8	2.24875	2.07767	FALSE	FALSE
NM_013859	36	8	29805	Znhit2	1.97898	1.58282	FALSE	FALSE
NM_139311	13	11	246198	Mllt6	1.53662	1.72112	FALSE	FALSE
NM_153544	13	3	217216	BC030867	1.53662	1.15685	FALSE	FALSE
NM_172145	19	7	230752	Eva1b	1.70143	1.52483	FALSE	FALSE
NM_025836	279	79	66905	Plin3	2.86828	2.57736	FALSE	FALSE
NM_007999	215	60	14156	Fen1	2.75512	2.45788	FALSE	FALSE
NM_001145821	146	29	14594	Ggta1	2.58703	2.14213	FALSE	FALSE
NM_001253702	67	27	229681	St7l	2.24875	2.1111	FALSE	FALSE
NM_138749	235	50	140570	Plxnb2	2.79374	2.3787	FALSE	FALSE
NM_139197	22	6	227671	Gbgt1	1.7651	1.45788	FALSE	FALSE
NM_080554	259	92	66998	Psmd5	2.83598	2.64352	FALSE	FALSE
NM_145529	81	13	228410	Cstf3	2.33116	1.79368	FALSE	FALSE
NM_030690	196	49	75646	Rai14	2.71493	2.36993	FALSE	FALSE
NM_009395	146	49	21927	Tnfaip1	2.58703	2.36993	FALSE	FALSE
NM_018825	41	17	23921	Sh2b2	2.03546	1.91018	FALSE	FALSE
NM_033444	5804	868	114584	Clic1	4.1864	3.61825	FALSE	FALSE
NM_001042513	1027	327	50493	Txnrd1	3.43425	3.19428	FALSE	FALSE
NM_175445	147	45	215653	Rassf2	2.58999	2.33294	FALSE	FALSE
NM_028840	134	26	74252	Armc1	2.54978	2.09471	FALSE	FALSE
NM_008583	42	22	17283	Men1	2.04593	2.02215	FALSE	FALSE
NM_021887	461	46	60504	Il21r	3.08638	2.34249	FALSE	FALSE
NM_029645	31	10	384281	Gatc	1.91404	1.67973	FALSE	FALSE
NM_019772	680	99	56372	1110004F10Rik	3.25519	2.67537	FALSE	FALSE
NM_011523	26	7	20975	Synj2	1.83765	1.52483	FALSE	FALSE
NM_178279	282	80	218699	Pxk	2.87293	2.58282	FALSE	FALSE
NM_001142697	34	14	66648	Tpgs2	1.95416	1.82586	FALSE	FALSE
NM_133850	190	64	99311	Commd7	2.70143	2.48591	FALSE	FALSE
NM_023117	36	20	12531	Cdc25b	1.97898	1.98076	FALSE	FALSE
NM_010911	87	27	18041	Nfs1	2.3622	2.1111	FALSE	FALSE
NM_198831	197	62	52443	Mrpl48	2.71714	2.47212	FALSE	FALSE
NM_001033711	1737	325	14017	Evi2a	3.66248	3.19162	FALSE	FALSE
NM_001164190	169	33	17772	Mtm1	2.65056	2.19825	FALSE	FALSE
NM_027975	15	5	71878	Fam83d	1.59877	1.3787	FALSE	FALSE
NM_001013379	24	11	234358	Zfp930	1.80289	1.72112	FALSE	FALSE
NM_001004142	39	12	195046	Nlrp1a	2.01374	1.75891	FALSE	FALSE
NM_007681	148	52	12615	Cenpa	2.59294	2.39574	FALSE	FALSE
NM_001166431	1957	542	98758	Hnrnpf	3.71427	3.41373	FALSE	FALSE
NM_001039137	135	55	56367	Scoc	2.55301	2.42009	FALSE	FALSE
NM_080446	37	4	117599	Helb	1.99088	1.28179	FALSE	FALSE
NM_028754	113	7	74098	0610037L13Rik	2.47576	1.52483	FALSE	FALSE
NM_007861	499	139	13382	Dld	3.12078	2.82275	FALSE	FALSE
NM_027900	30	7	71750	R3hdm2	1.8998	1.52483	FALSE	FALSE
NM_024273	29	11	76916	Timmdc1	1.88508	1.72112	FALSE	FALSE
NM_201357	189	25	380752	Tssc1	2.69914	2.07767	FALSE	FALSE
NM_133825	349	54	52392	D1Ertd622e	2.9655	2.41213	FALSE	FALSE
NM_201407	65	28	229541	Dennd4b	2.23559	2.12689	FALSE	FALSE
NM_025281	84	25	17089	Lyar	2.34696	2.07767	FALSE	FALSE
NM_177601	13	5	212090	Tmem60	1.53662	1.3787	FALSE	FALSE
NM_130882	54	9	170716	Cyp4f13	2.15507	1.63397	FALSE	FALSE
NM_001146086	27	11	78938	Fbxo34	1.85404	1.72112	FALSE	FALSE
NM_021335	610	96	20639	Snrpb2	3.20801	2.662	FALSE	FALSE
NM_023773	47	26	75339	Mphosph8	2.09477	2.09471	FALSE	FALSE
NM_134042	20	7	104776	Aldh6a1	1.72371	1.52483	FALSE	FALSE
NM_001110809	25	9	66614	Gpatch4	1.82062	1.63397	FALSE	FALSE
NM_007788	506	184	12995	Csnk2a1	3.12683	2.94455	FALSE	FALSE
NM_178891	56	20	99890	Prmt6	2.17087	1.98076	FALSE	FALSE
NM_172620	91	15	224705	Vps52	2.38172	1.85582	FALSE	FALSE
NM_198013	16	4	103841	Cuedc1	1.6268	1.28179	FALSE	FALSE
NM_152815	14	2	72635	Lins	1.56881	1	FALSE	FALSE
NM_021524	1634	279	59027	Nampt	3.63593	3.12534	FALSE	FALSE
NM_183138	15	7	194388	Tet3	1.59877	1.52483	FALSE	FALSE
NM_011822	28	16	14755	Pigq	1.86984	1.88385	FALSE	FALSE
NM_027395	536	46	70350	Basp1	3.15184	2.34249	FALSE	FALSE
NM_020035	15	2	56703	Pigo	1.59877	1	FALSE	FALSE
NM_009830	36	28	12448	Ccne2	1.97898	2.12689	FALSE	FALSE
NM_019501	40	4	56075	Pdss1	2.02474	1.28179	FALSE	FALSE
NM_028233	85	29	72416	Lrpprc	2.3521	2.14213	FALSE	FALSE
NM_001040403	102	48	14252	Flot2	2.43128	2.36097	FALSE	FALSE
NM_001159525	199	33	19298	Pex19	2.72153	2.19825	FALSE	FALSE
NM_148922	15	10	17245	Mdm1	1.59877	1.67973	FALSE	FALSE
NM_007928	141	42	13728	Mark2	2.5719	2.30298	FALSE	FALSE
NM_001033463	18	15	381801	Tatdn2	1.67795	1.85582	FALSE	FALSE
NM_177582	23	14	208104	Mlxip	1.7844	1.82586	FALSE	FALSE
NM_010807	2262	348	17357	Marcksl1	3.77717	3.22131	FALSE	FALSE
NM_013770	129	48	27376	Slc25a10	2.53327	2.36097	FALSE	FALSE
NM_010546	129	59	16150	Ikbkb	2.53327	2.45058	FALSE	FALSE
NM_199018	72	11	236920	Stard8	2.28001	1.72112	FALSE	FALSE
NM_001033157	24	16	236366	5730507C01Rik	1.80289	1.88385	FALSE	FALSE
NM_001122978	17	7	26885	Casp8ap2	1.65313	1.52483	FALSE	FALSE
NM_146238	13	3	237221	Gemin8	1.53662	1.15685	FALSE	FALSE
NM_007713	73	28	102414	Clk3	2.286	2.12689	FALSE	FALSE
NM_025388	295	48	66155	Ufc1	2.8925	2.36097	FALSE	FALSE
NM_001039959	164	23	66395	Ahnak	2.63752	2.04146	FALSE	FALSE
NM_001165997	23	7	76857	Spopl	1.7844	1.52483	FALSE	FALSE
NM_001142921	75	25	21416	Tcf7l2	2.29774	2.07767	FALSE	FALSE
NM_001167991	26	12	170833	Hook2	1.83765	1.75891	FALSE	FALSE
NM_018793	55	9	54721	Tyk2	2.16304	1.63397	FALSE	FALSE
NM_026675	41	7	68323	Nudt22	2.03546	1.52483	FALSE	FALSE
NM_001100109	945	326	665155	Srp54b	3.39811	3.19295	FALSE	FALSE
NM_001162989	175	35	56698	Phax	2.66572	2.2238	FALSE	FALSE
NM_029573	326	92	67834	Idh3a	2.93589	2.64352	FALSE	FALSE
NM_026125	23	7	67389	Fam132a	1.7844	1.52483	FALSE	FALSE
NM_029814	660	118	76959	Chmp5	3.24222	2.75161	FALSE	FALSE
NM_026392	110	41	70397	Tmem70	2.46407	2.29252	FALSE	FALSE
NM_001190302	59	12	665211	Gm14326	2.19353	1.75891	FALSE	FALSE
NM_023526	30	3	69721	Nkiras1	1.8998	1.15685	FALSE	FALSE
NM_020493	24	14	20807	Srf	1.80289	1.82586	FALSE	FALSE
NM_025313	932	161	66043	Atp5d	3.39209	2.88656	FALSE	FALSE
NM_001243040	2232	310	100042856	Gm4070	3.77137	3.17109	FALSE	FALSE
NM_011897	64	25	24064	Spry2	2.22886	2.07767	FALSE	FALSE
NM_025443	447	74	66249	Pno1	3.07298	2.54896	FALSE	FALSE
NM_026091	91	17	67326	1700037H04Rik	2.38172	1.91018	FALSE	FALSE
NM_001252491	29	20	64291	Osbpl1a	1.88508	1.98076	FALSE	FALSE
NM_001145960	908	217	56857	Slc37a2	3.38076	3.01619	FALSE	FALSE
NM_001252200	119	61	26921	Map4k4	2.49822	2.46506	FALSE	FALSE
NM_178925	25	4	106338	Nsun3	1.82062	1.28179	FALSE	FALSE
NM_007502	2701	504	11933	Atp1b3	3.8542	3.38216	FALSE	FALSE
NM_008194	377	72	14933	Gyk	2.99902	2.53706	FALSE	FALSE
NM_026518	65	12	68031	Rnf146	2.23559	1.75891	FALSE	FALSE
NM_145976	110	16	212937	Tifab	2.46407	1.88385	FALSE	FALSE
NM_011956	255	47	26426	Nubp2	2.82922	2.35183	FALSE	FALSE
NM_008723	177	41	18150	Npm3	2.67065	2.29252	FALSE	FALSE
NM_001252550	103	37	217370	BC017643	2.43551	2.24793	FALSE	FALSE
NM_001163555	169	43	18987	Pou2f2	2.65056	2.3132	FALSE	FALSE
NM_025872	74	30	66964	Golt1b	2.29191	2.15685	FALSE	FALSE
NM_020589	27	6	68910	Zfp467	1.85404	1.45788	FALSE	FALSE
NM_173388	590	219	215113	Slc43a2	3.19353	3.02018	FALSE	FALSE
NM_183031	141	72	321019	Gpr183	2.5719	2.53706	FALSE	FALSE
NM_001013832	48	13	436440	Gpr31b	2.10392	1.79368	FALSE	FALSE
NM_172578	38	17	217653	Mis18bp1	2.00246	1.91018	FALSE	FALSE
NM_001164406	301	56	24068	Sra1	2.90124	2.42792	FALSE	FALSE
NM_172260	13	4	216543	Cep68	1.53662	1.28179	FALSE	FALSE
NM_026187	14	4	52231	Ankzf1	1.56881	1.28179	FALSE	FALSE
NM_001252587	105	29	228880	Zmynd8	2.44387	2.14213	FALSE	FALSE
NM_026877	94	31	68938	Aspscr1	2.3958	2.17109	FALSE	FALSE
NM_007700	69	46	12675	Chuk	2.26153	2.34249	FALSE	FALSE
NM_009351	89	28	21745	Tep1	2.37207	2.12689	FALSE	FALSE
NM_207636	885	135	319448	Fndc3a	3.36962	2.81007	FALSE	FALSE
NM_025375	154	36	66138	Wbscr22	2.6102	2.23603	FALSE	FALSE
NM_178701	92	26	231549	Lrrc8d	2.38646	2.09471	FALSE	FALSE
NM_001165984	532	118	74383	Ubap2l	3.14859	2.75161	FALSE	FALSE
NM_013860	45	24	29806	Limd1	2.07589	2.05994	FALSE	FALSE
NM_001037940	1298	346	23950	Dnajb6	3.53595	3.21881	FALSE	FALSE
NM_001145902	249	61	228359	Arhgap1	2.81888	2.46506	FALSE	FALSE
NM_026662	134	40	110639	Prps2	2.54978	2.28179	FALSE	FALSE
NM_001100116	581	94	100101807	1700047I17Rik2	3.18685	2.65286	FALSE	FALSE
NM_001130458	543	176	21452	Tcn2	3.15748	2.92524	FALSE	FALSE
NM_198109	12	11	231637	Ssh1	1.50186	1.72112	FALSE	FALSE
NM_009157	212	80	26398	Map2k4	2.74901	2.58282	FALSE	FALSE
NM_001162996	124	34	72205	Eml2	2.5161	2.21121	FALSE	FALSE
NM_019637	20	7	56291	Styx	1.72371	1.52483	FALSE	FALSE
NM_173443	242	55	70675	Vcpip1	2.80649	2.42009	FALSE	FALSE
NM_001160415	1014	131	80287	Apobec3	3.42872	2.797	FALSE	FALSE
NM_145510	27	7	98710	Rabif	1.85404	1.52483	FALSE	FALSE
NM_025591	87	18	66488	Fam136a	2.3622	1.935	FALSE	FALSE
NM_029861	13	2	380686	Cnrip1	1.53662	1	FALSE	FALSE
NM_016706	22	6	12812	Coil	1.7651	1.45788	FALSE	FALSE
NM_029278	72	27	75416	Nop14	2.28001	2.1111	FALSE	FALSE
NM_010155	47	21	13875	Erf	2.09477	2.00195	FALSE	FALSE
NM_025300	186	46	27395	Mrpl15	2.69219	2.34249	FALSE	FALSE
NM_175104	94	15	66306	Fam53c	2.3958	1.85582	FALSE	FALSE
NM_028369	15	3	72825	Mon1a	1.59877	1.15685	FALSE	FALSE
NM_007483	615	173	11852	Rhob	3.21155	2.91778	FALSE	FALSE
NM_177111	16	9	320234	Ccdc66	1.6268	1.63397	FALSE	FALSE
NM_025968	230	42	67103	Ptgr1	2.7844	2.30298	FALSE	FALSE
NM_023243	102	45	66671	Ccnh	2.43128	2.33294	FALSE	FALSE
NM_177780	11	3	68813	Dock5	1.46407	1.15685	FALSE	FALSE
NM_011884	102	37	24018	Rngtt	2.43128	2.24793	FALSE	FALSE
NM_025450	160	26	66258	Mrps17	2.6268	2.09471	FALSE	FALSE
NM_011233	61	32	19356	Rad17	2.20801	2.18488	FALSE	FALSE
NM_007609	855	138	12363	Casp4	3.35464	2.81961	FALSE	FALSE
NM_145943	241	52	208768	Sde2	2.80469	2.39574	FALSE	FALSE
NM_019682	811	87	56455	Dynll1	3.3317	2.61925	FALSE	FALSE
NM_008248	1108	197	15254	Hint1	3.46722	2.9742	FALSE	FALSE
NM_008730	112	37	18164	Nptx1	2.4719	2.24793	FALSE	FALSE
NM_001160378	437	94	212943	Fam46a	3.06316	2.65286	FALSE	FALSE
NM_010120	439	82	13664	Eif1a	3.06514	2.59355	FALSE	FALSE
NM_001167887	39	9	225888	Suv420h1	2.01374	1.63397	FALSE	FALSE
NM_001077359	104	43	26431	Git2	2.43971	2.3132	FALSE	FALSE
NM_001029994	86	24	76014	Zc3h18	2.35718	2.05994	FALSE	FALSE
NM_020022	107	15	19718	Rfc2	2.45206	1.85582	FALSE	FALSE
NM_013815	148	71	217578	Baz1a	2.59294	2.53099	FALSE	FALSE
NM_001205231	800	222	22185	U2af2	3.32577	3.02609	FALSE	FALSE
NM_022015	47	14	63856	Taf8	2.09477	1.82586	FALSE	FALSE
NM_027382	30	6	70315	Hdac8	1.8998	1.45788	FALSE	FALSE
NM_178693	34	8	227683	Coq4	1.95416	1.58282	FALSE	FALSE
NM_001163704	89	30	50762	Fbxo6	2.37207	2.15685	FALSE	FALSE
NM_016896	8	16	53859	Map3k14	1.32577	1.88385	FALSE	FALSE
NM_001081321	53	45	71521	Pds5a	2.14695	2.33294	FALSE	FALSE
NM_009939	433	77	12848	Cops2	3.05916	2.56622	FALSE	FALSE
NM_153795	775	233	108101	Fermt3	3.31198	3.04709	FALSE	FALSE
NM_001177406_dup2	44	18	NA	NA	2.06613	1.935	FALSE	FALSE
NM_001005509	436	88	229317	Eif2a	3.06216	2.62421	FALSE	FALSE
NM_001177752	697	196	170768	Pfkfb3	3.26591	2.97199	FALSE	FALSE
NM_001114085	226	55	67203	Nde1	2.77679	2.42009	FALSE	FALSE
NM_133780	251	114	108989	Tpr	2.82235	2.73664	FALSE	FALSE
NM_177263	14	1	320799	Zhx3	1.56881	1	FALSE	FALSE
NM_001005475	65	14	245666	Iqsec2	2.23559	1.82586	FALSE	FALSE
NM_133906	52	17	74570	Zkscan1	2.13868	1.91018	FALSE	FALSE
NM_009405	14	1	21953	Tnni2	1.56881	1	FALSE	FALSE
NM_026958	615	82	380773	Slirp	3.21155	2.59355	FALSE	FALSE
NM_008033	273	64	14272	Fnta	2.85884	2.48591	FALSE	FALSE
NM_010304	297	62	14676	Gna15	2.89543	2.47212	FALSE	FALSE
NM_146065	93	24	223922	Atf7	2.39116	2.05994	FALSE	FALSE
NM_021436	29	16	230157	Tmeff1	1.88508	1.88385	FALSE	FALSE
NM_001081152	28	11	244879	Npat	1.86984	1.72112	FALSE	FALSE
NM_019480	30	8	55960	Ebag9	1.8998	1.58282	FALSE	FALSE
NM_029788	71	27	76892	Rnft1	2.27394	2.1111	FALSE	FALSE
NM_027830	12	8	71567	Mcm9	1.50186	1.58282	FALSE	FALSE
NM_001256055	591	156	100042807	Eif3j2	3.19426	2.87286	FALSE	FALSE
NM_001162417	136	38	17876	Myef2	2.55622	2.25952	FALSE	FALSE
NM_027711	85	28	544963	Iqgap2	2.3521	2.12689	FALSE	FALSE
NM_001164352	25	9	58859	Efemp2	1.82062	1.63397	FALSE	FALSE
NM_027180	184	86	69710	Arap1	2.68749	2.61423	FALSE	FALSE
NM_016957	619	93	15331	Hmgn2	3.21437	2.64822	FALSE	FALSE
NM_001195338	61	10	100503572	Bbip1	2.20801	1.67973	FALSE	FALSE
NM_001038839	117	44	18439	P2rx7	2.49086	2.32318	FALSE	FALSE
NM_028185	38	10	72290	Lsm11	2.00246	1.67973	FALSE	FALSE
NM_008914	113	40	19056	Ppp3cb	2.47576	2.28179	FALSE	FALSE
NM_172691	14	6	230088	Fam214b	1.56881	1.45788	FALSE	FALSE
NM_025937	141	52	67050	Nkap	2.5719	2.39574	FALSE	FALSE
NM_023232	63	30	66593	Diablo	2.22202	2.15685	FALSE	FALSE
NM_001163102	17	3	193838	Eme2	1.65313	1.15685	FALSE	FALSE
NM_001025309	245	48	224938	Pja2	2.81184	2.36097	FALSE	FALSE
NM_009881	18	5	12593	Cdyl	1.67795	1.3787	FALSE	FALSE
NM_175092	11	4	23912	Rhof	1.46407	1.28179	FALSE	FALSE
NM_001195244	164	18	100503890	Pet100	2.63752	1.935	FALSE	FALSE
NM_026554	154	37	68092	Ncbp2	2.6102	2.24793	FALSE	FALSE
NM_019651	41	16	56294	Ptpn9	2.03546	1.88385	FALSE	FALSE
NM_001166408	196	49	75646	Rai14	2.71493	2.36993	FALSE	FALSE
NM_001163388	76	18	68020	Apopt1	2.30349	1.935	FALSE	FALSE
NM_013918	328	96	30940	Usp25	2.93855	2.662	FALSE	FALSE
NM_007858	243	113	13367	Diap1	2.80828	2.73281	FALSE	FALSE
NM_028343	163	80	72759	Tmem135	2.63486	2.58282	FALSE	FALSE
NM_172974	47	13	26895	Cops7b	2.09477	1.79368	FALSE	FALSE
NM_153049	71	24	223701	Mkl1	2.27394	2.05994	FALSE	FALSE
NM_025982	317	102	67125	Tspan31	2.92374	2.68833	FALSE	FALSE
NM_011615	165	35	21945	Dedd	2.64016	2.2238	FALSE	FALSE
NM_027351	71	11	70225	Ppil3	2.27394	1.72112	FALSE	FALSE
NM_001164569	49	14	67338	Rffl	2.11287	1.82586	FALSE	FALSE
NM_001199271	18	6	20509	Slc19a1	1.67795	1.45788	FALSE	FALSE
NM_029418	31	9	75758	9130401M01Rik	1.91404	1.63397	FALSE	FALSE
NM_146168	84	42	232023	Vopp1	2.34696	2.30298	FALSE	FALSE
NM_001177543_dup2	61	12	NA	NA	2.20801	1.75891	FALSE	FALSE
NM_007964	22	5	14020	Evi5	1.7651	1.3787	FALSE	FALSE
NM_001037863	59	36	320940	Atp11c	2.19353	2.23603	FALSE	FALSE
NM_175683	91	13	227525	Dclre1c	2.38172	1.79368	FALSE	FALSE
NM_053204	40	11	111173	Erc1	2.02474	1.72112	FALSE	FALSE
NM_019729	174	33	84092	Usp8	2.66323	2.19825	FALSE	FALSE
NM_007447	47	7	11727	Ang	2.09477	1.52483	FALSE	FALSE
NM_011660	3177	410	22166	Txn1	3.92469	3.29252	FALSE	FALSE
NM_001037746	105	45	328099	Prps1l3	2.44387	2.33294	FALSE	FALSE
NM_010788	100	16	17257	Mecp2	2.42268	1.88385	FALSE	FALSE
NM_025494	446	75	66335	Atp6v1c1	3.07201	2.55479	FALSE	FALSE
NM_001026212	269	35	56205	Ensa	2.85243	2.2238	FALSE	FALSE
NM_010928	424	119	18129	Notch2	3.05004	2.75528	FALSE	FALSE
NM_001033988	443	82	27057	Ncoa4	3.06908	2.59355	FALSE	FALSE
NM_011426	622	154	20612	Siglec1	3.21647	2.86725	FALSE	FALSE
NM_172592	77	34	218543	Srek1	2.30917	2.21121	FALSE	FALSE
NM_001164420	129	26	66943	Pqlc1	2.53327	2.09471	FALSE	FALSE
NM_001076789	90	30	12419	Cbx5	2.37692	2.15685	FALSE	FALSE
NM_173432	13	7	244631	Pskh1	1.53662	1.52483	FALSE	FALSE
NM_016755	810	129	11957	Atp5j	3.33116	2.79032	FALSE	FALSE
NM_001005523	182	32	208606	Rsrc2	2.68275	2.18488	FALSE	FALSE
NM_027470	20	5	70584	Pak4	1.72371	1.3787	FALSE	FALSE
NM_008042	53	9	14294	Fpr3	2.14695	1.63397	FALSE	FALSE
NM_001253870	139	35	235043	Tmem205	2.56569	2.2238	FALSE	FALSE
NM_026446	190	65	56470	Rgs19	2.70143	2.49265	FALSE	FALSE
NM_011185	1377	247	19170	Psmb1	3.56161	3.07243	FALSE	FALSE
NM_194462	26	8	100986	Akap9	1.83765	1.58282	FALSE	FALSE
NM_013653	1675	109	20304	Ccl5	3.64669	2.71716	FALSE	FALSE
NM_028866	164	24	74320	Wdr33	2.63752	2.05994	FALSE	FALSE
NM_001164689_dup1	60	12	NA	NA	2.20083	1.75891	FALSE	FALSE
NM_178363	30	16	56531	Ylpm1	1.8998	1.88385	FALSE	FALSE
NM_001142918	77	26	21416	Tcf7l2	2.30917	2.09471	FALSE	FALSE
NM_001195486	997	240	225027	Srsf7	3.42137	3.05994	FALSE	FALSE
NM_172116	89	11	213350	Pddc1	2.37207	1.72112	FALSE	FALSE
NM_023041	297	45	19298	Pex19	2.89543	2.33294	FALSE	FALSE
NM_030702	109	37	80886	Senp3	2.4601	2.24793	FALSE	FALSE
NM_021465	216	66	20843	Stag2	2.75713	2.49928	FALSE	FALSE
NM_001081181	161	33	68115	9430016H08Rik	2.6295	2.19825	FALSE	FALSE
NM_026752	21	4	68520	Zfyve21	1.7449	1.28179	FALSE	FALSE
NM_027614	17	5	70948	Wdr20rt	1.65313	1.3787	FALSE	FALSE
NM_009067	36	20	19765	Ralbp1	1.97898	1.98076	FALSE	FALSE
NM_019817	600	89	56447	Copz1	3.20083	2.62912	FALSE	FALSE
NM_001110351	55	24	20466	Sin3a	2.16304	2.05994	FALSE	FALSE
NM_175287	56	24	97159	A430005L14Rik	2.17087	2.05994	FALSE	FALSE
NM_013477	727	221	11972	Atp6v0d1	3.28421	3.02412	FALSE	FALSE
NM_178796	233	31	328830	A530064D06Rik	2.79003	2.17109	FALSE	FALSE
NM_199146	781	90	209387	Trim30d	3.31533	2.63397	FALSE	FALSE
NM_153580	143	33	233875	Ino80e	2.57801	2.19825	FALSE	FALSE
NM_133744	35	19	72454	Ccdc71	1.96675	1.95849	FALSE	FALSE
NM_001166589	4230	656	276770	Eif5a	4.04902	3.49664	FALSE	FALSE
NM_139153	43	23	213990	Agap3	2.05615	2.04146	FALSE	FALSE
NM_177876	218	39	330192	Vps37b	2.76113	2.2708	FALSE	FALSE
NM_012049	126	36	27045	Nit1	2.52305	2.23603	FALSE	FALSE
NM_029762	14	5	76832	Hyls1	1.56881	1.3787	FALSE	FALSE
NM_001164604	164	19	68501	Nsmce2	2.63752	1.95849	FALSE	FALSE
NM_001044704	40	7	22697	Zscan21	2.02474	1.52483	FALSE	FALSE
NM_030243	308	73	71684	Rbm43	2.91123	2.54306	FALSE	FALSE
NM_027405	92	24	70373	Gpatch2l	2.38646	2.05994	FALSE	FALSE
NM_001253805	4757	674	22631	Ywhaz	4.10001	3.50839	FALSE	FALSE
NM_011879	1051	163	24010	Ik	3.44428	2.89192	FALSE	FALSE
NM_001110229	530	139	14007	Celf2	3.14695	2.82275	FALSE	FALSE
NM_009210	67	21	20585	Hltf	2.24875	2.00195	FALSE	FALSE
NM_026033	36	37	67210	Gatad1	1.97898	2.24793	FALSE	FALSE
NM_001252433	38	20	13383	Dlg1	2.00246	1.98076	FALSE	FALSE
NM_009728	19	5	11982	Atp10a	1.70143	1.3787	FALSE	FALSE
NM_008176	248	127	14825	Cxcl1	2.81713	2.78354	TRUE	FALSE
NM_001128198	67	10	230895	Vps13d	2.24875	1.67973	FALSE	FALSE
NM_001082962	14	1	20646	Snrpn	1.56881	1	FALSE	FALSE
NM_031998	35	8	83922	Cep41	1.96675	1.58282	FALSE	FALSE
NM_198606	596	126	223499	Dcaf13	3.19792	2.7801	FALSE	FALSE
NM_001102415	12	3	117591	Slc2a9	1.50186	1.15685	FALSE	FALSE
NM_001081215	369	43	234311	Ddx60	2.9897	2.3132	FALSE	FALSE
NM_001161456	191	50	12400	Cbfb	2.70371	2.3787	FALSE	FALSE
NM_021472	395	64	58809	Rnase4	3.01927	2.48591	FALSE	FALSE
NM_001177407_dup1	44	15	NA	NA	2.06613	1.85582	FALSE	FALSE
NM_178644	196	74	102644	Oaf	2.71493	2.54896	FALSE	FALSE
NM_172893	692	124	243771	Parp12	3.26278	2.77315	FALSE	FALSE
NM_198246	66	17	70120	Yars2	2.24222	1.91018	FALSE	FALSE
NM_019804	13	1	56375	B4galt4	1.53662	1	FALSE	FALSE
NM_175294	866	204	98415	Nucks1	3.36019	2.98936	FALSE	FALSE
NM_026169	162	42	67457	Frmd8	2.63219	2.30298	FALSE	FALSE
NM_013464	19	8	11622	Ahr	1.70143	1.58282	FALSE	FALSE
NM_177128	22	3	320299	Iqcb1	1.7651	1.15685	FALSE	FALSE
NM_175423	288	158	109305	Orai1	2.88207	2.87839	FALSE	FALSE
NM_026899	702	154	68991	Ssu72	3.26901	2.86725	FALSE	FALSE
NM_001199187	57	17	69090	Ascc1	2.17855	1.91018	FALSE	FALSE
NM_029094	124	31	74769	Pik3cb	2.5161	2.17109	FALSE	FALSE
NM_030225	441	97	78920	Dlst	3.06712	2.6665	FALSE	FALSE
NM_029623	117	30	76482	3110002H16Rik	2.49086	2.15685	FALSE	FALSE
NM_001081471	19	10	668178	Mettl7a3	1.70143	1.67973	FALSE	FALSE
NM_009272	175	89	20810	Srm	2.66572	2.62912	FALSE	FALSE
NM_026055	1993	233	67248	Rpl39	3.72218	3.04709	FALSE	FALSE
NM_008688	71	44	18029	Nfic	2.27394	2.32318	FALSE	FALSE
NM_001252455	31	8	19280	Ptprs	1.91404	1.58282	FALSE	FALSE
NM_001177402	53	3	68554	Cebpzos	2.14695	1.15685	FALSE	FALSE
NM_008828	5498	1353	18655	Pgk1	4.16288	3.81103	FALSE	FALSE
NM_001166596	4230	656	276770	Eif5a	4.04902	3.49664	FALSE	FALSE
NM_139140	15	9	72572	Spats2	1.59877	1.63397	FALSE	FALSE
NM_013749	73	12	27279	Tnfrsf12a	2.286	1.75891	FALSE	FALSE
NM_025533	187	45	66394	Nosip	2.69452	2.33294	FALSE	FALSE
NM_009975	1643	182	13001	Csnk2b	3.63831	2.9398	FALSE	FALSE
NM_012056	32	15	27055	Fkbp9	1.92783	1.85582	FALSE	FALSE
NM_199469	315	119	217365	Nploc4	2.92099	2.75528	FALSE	FALSE
NM_001164671	1455	374	15502	Dnaja1	3.58554	3.2526	FALSE	FALSE
NM_030250	194	50	52014	Nus1	2.71048	2.3787	FALSE	FALSE
NM_027412	117	9	70387	Ttc9c	2.49086	1.63397	FALSE	FALSE
NM_001253812	107	15	74195	Elp3	2.45206	1.85582	FALSE	FALSE
NM_013635	863	176	19027	Sypl	3.35869	2.92524	FALSE	FALSE
NM_026020	2771	314	67186	Rplp2	3.86531	3.17666	FALSE	FALSE
NM_008613	15	6	17427	Mns1	1.59877	1.45788	FALSE	FALSE
NM_017370	137	38	15439	Hp	2.5594	2.25952	FALSE	FALSE
NM_025829	46	18	66892	Eif4e3	2.08543	1.935	FALSE	FALSE
NM_008143	6546	1557	14694	Gnb2l1	4.23865	3.87202	FALSE	FALSE
NM_175935	103	49	68401	G6pc3	2.43551	2.36993	FALSE	FALSE
NM_001253715	154	47	110265	Msra	2.6102	2.35183	FALSE	FALSE
NM_001171053	124	32	116871	Mta3	2.5161	2.18488	FALSE	FALSE
NM_181796	28	2	14869	Gstp2	1.86984	1	FALSE	FALSE
NM_001172117	1254	360	15162	Hck	3.52097	3.23603	FALSE	FALSE
NM_133942	80	29	101476	Plekha1	2.32577	2.14213	FALSE	FALSE
NM_026914	401	87	69029	Smdt1	3.02582	2.61925	FALSE	FALSE
NM_001160019	1861	295	208263	Tor1aip1	3.69242	3.14955	FALSE	FALSE
NM_001024922	127	33	234374	Ddx49	2.52648	2.19825	FALSE	FALSE
NM_026473	1075	250	67951	Tubb6	3.45409	3.07767	FALSE	FALSE
NM_133212	1441	207	170744	Tlr8	3.58134	2.9957	FALSE	FALSE
NM_011192	530	174	19192	Psme3	3.14695	2.92028	FALSE	FALSE
NM_027881	114	17	71720	Osbpl3	2.47958	1.91018	FALSE	FALSE
NM_013640	1316	164	19171	Psmb10	3.54193	2.89458	FALSE	FALSE
NM_144517	41	19	67249	Tbc1d19	2.03546	1.95849	FALSE	FALSE
NM_013558	45	15	15482	Hspa1l	2.07589	1.85582	FALSE	FALSE
NM_001080995	13	3	74041	Ddias	1.53662	1.15685	FALSE	FALSE
NM_019765	59	31	56430	Clip1	2.19353	2.17109	FALSE	FALSE
NM_001164200	240	110	18749	Prkacb	2.80289	2.72112	FALSE	FALSE
NM_001164118	2348	503	20719	Serpinb6a	3.79338	3.3813	FALSE	FALSE
NM_001039201	83	16	76987	Hdhd2	2.34176	1.88385	FALSE	FALSE
NM_001081383	24	7	231051	Kmt2c	1.80289	1.52483	FALSE	FALSE
NM_025717	57	10	66704	Rbm4b	2.17855	1.67973	FALSE	FALSE
NM_144931	162	55	234664	Nae1	2.63219	2.42009	FALSE	FALSE
NM_010241	55	11	14339	Aktip	2.16304	1.72112	FALSE	FALSE
NM_011462	99	26	20729	Spin1	2.41831	2.09471	FALSE	FALSE
NM_178598	5711	849	21346	Tagln2	4.17939	3.60864	FALSE	FALSE
NM_001081109	16	4	231876	Lmtk2	1.6268	1.28179	FALSE	FALSE
NM_016791	73	21	18018	Nfatc1	2.286	2.00195	FALSE	FALSE
NM_011332	17	3	20295	Ccl17	1.65313	1.15685	FALSE	FALSE
NM_019710	162	46	24061	Smc1a	2.63219	2.34249	FALSE	FALSE
NM_028394	58	8	72938	Hspb11	2.18611	1.58282	FALSE	FALSE
NM_010447	3515	545	15382	Hnrnpa1	3.9686	3.41613	FALSE	FALSE
NM_008327	81	14	26388	Ifi202b	2.33116	1.82586	FALSE	FALSE
NM_001081075	38	18	70567	Fra10ac1	2.00246	1.935	FALSE	FALSE
NM_001033337	13	5	239570	Ttc38	1.53662	1.3787	FALSE	FALSE
NM_175654	12267	1549	319156	Hist1h4d	4.51142	3.86978	FALSE	FALSE
NM_126166	397	27	142980	Tlr3	3.02147	2.1111	FALSE	FALSE
NM_001163641	48	15	84505	Setdb1	2.10392	1.85582	FALSE	FALSE
NM_008392	9088	1560	16365	Irg1	4.38115	3.87286	FALSE	FALSE
NM_001081000	78	36	15547	Trmt2a	2.31477	2.23603	FALSE	FALSE
NM_001110131	39	20	71722	Cic	2.01374	1.98076	FALSE	FALSE
NM_029454	54	9	52023	Pibf1	2.15507	1.63397	FALSE	FALSE
NM_146124	264	57	228359	Arhgap1	2.84428	2.43561	FALSE	FALSE
NM_011790	44	7	23807	Arih2	2.06613	1.52483	FALSE	FALSE
NM_001177709	183	41	228998	Arfgap1	2.68513	2.29252	FALSE	FALSE
NM_001159604	72	36	80912	Pum1	2.28001	2.23603	FALSE	FALSE
NM_012005	48	40	26896	Med14	2.10392	2.28179	FALSE	FALSE
NM_001253391	26	9	67472	Mtfr1	1.83765	1.63397	FALSE	FALSE
NM_010106	46709	8114	13627	Eef1a1	5.09208	4.58897	FALSE	FALSE
NM_001146161	485	137	18174	Slc11a2	3.10842	2.81645	FALSE	FALSE
NM_198026	19	5	230767	Iqcc	1.70143	1.3787	FALSE	FALSE
NM_021537	92	16	59041	Stk25	2.38646	1.88385	FALSE	FALSE
NM_011835	310	75	23924	Katna1	2.91404	2.55479	FALSE	FALSE
NM_001110265	28	13	22137	Ttk	1.86984	1.79368	FALSE	FALSE
NM_001159288	45	12	74522	Morc2a	2.07589	1.75891	FALSE	FALSE
NM_013684	106	19	21374	Tbp	2.44798	1.95849	FALSE	FALSE
NM_009823	34	13	12396	Cbfa2t2	1.95416	1.79368	FALSE	FALSE
NM_001199248	105	30	81601	Kat5	2.44387	2.15685	FALSE	FALSE
NM_001168536	19	9	71891	Cdadc1	1.70143	1.63397	FALSE	FALSE
NM_025898	548	92	108124	Napa	3.16146	2.64352	FALSE	FALSE
NM_008132	72	3	14659	Glrp1	2.28001	1.15685	FALSE	FALSE
NM_009193	208	42	20492	Slbp	2.74074	2.30298	FALSE	FALSE
NM_023320	142	42	67220	Plekho1	2.57497	2.30298	FALSE	FALSE
NM_053194	106	40	101489	Ric8	2.44798	2.28179	FALSE	FALSE
NM_013763	51	28	27368	Tbl2	2.13025	2.12689	FALSE	FALSE
NM_028956	150	30	74467	Pus10	2.59877	2.15685	FALSE	FALSE
NM_010559	97	45	16194	Il6ra	2.40945	2.33294	FALSE	FALSE
NM_001142411	20	11	245174	Zfp937	1.72371	1.72112	FALSE	FALSE
NM_133991	32	14	54632	Ftsj1	1.92783	1.82586	FALSE	FALSE
NM_198642	42	8	271221	5031414D18Rik	2.04593	1.58282	FALSE	FALSE
NM_134020	314	72	103694	Tmed4	2.91961	2.53706	FALSE	FALSE
NM_019927	193	72	23806	Arih1	2.70823	2.53706	FALSE	FALSE
NM_026402	412	124	67841	Atg3	3.03757	2.77315	FALSE	FALSE
NM_011840	46	23	23938	Map2k5	2.08543	2.04146	FALSE	FALSE
NM_011141	16	1	18991	Pou3f1	1.6268	1	FALSE	FALSE
NM_028659	613	114	73830	Eif3k	3.21014	2.73664	FALSE	FALSE
NM_013507	1454	925	13690	Eif4g2	3.58524	3.64587	FALSE	FALSE
NM_145370	179	59	209318	Gps1	2.67553	2.45058	FALSE	FALSE
NM_177353	50	13	236727	Slc9a7	2.12165	1.79368	FALSE	FALSE
NM_001008425	178	32	386612	Thoc6	2.6731	2.18488	FALSE	FALSE
NM_001077687	15	4	80877	Lrba	1.59877	1.28179	FALSE	FALSE
NM_026688	408	81	68349	Ndufs3	3.03334	2.58822	FALSE	FALSE
NM_001252288	325	81	18293	Ogdh	2.93456	2.58822	FALSE	FALSE
NM_138756	82	24	192287	Slc25a36	2.33649	2.05994	FALSE	FALSE
NM_028545	34	7	73458	1700055N04Rik	1.95416	1.52483	FALSE	FALSE
NM_029546	47	25	110816	Pwp2	2.09477	2.07767	FALSE	FALSE
NM_019992	1939	556	56792	Stap1	3.71025	3.42481	FALSE	FALSE
NM_025326	208	44	66058	Tmem176a	2.74074	2.32318	FALSE	FALSE
NM_026828	24	10	52838	Dnlz	1.80289	1.67973	FALSE	FALSE
NM_001165935	39	17	74268	Aven	2.01374	1.91018	FALSE	FALSE
NM_001243053	99	25	12036	Bcat2	2.41831	2.07767	FALSE	FALSE
NM_139063	44	2	17828	Bloc1s5	2.06613	1	FALSE	FALSE
NM_001163159	168	25	13026	Pcyt1a	2.64799	2.07767	FALSE	FALSE
NM_025476	47	9	66302	Rmdn1	2.09477	1.63397	FALSE	FALSE
NM_029652	69	14	207952	Klhl25	2.26153	1.82586	FALSE	FALSE
NM_026613	42	17	68201	Ccdc34	2.04593	1.91018	FALSE	FALSE
NM_001164734	57	26	56524	Mpp6	2.17855	2.09471	FALSE	FALSE
NM_008187	60	28	14894	Cfap20	2.20083	2.12689	FALSE	FALSE
NM_145969	46	38	211922	Dennd6a	2.08543	2.25952	FALSE	FALSE
NM_011949	673	255	26413	Mapk1	3.25069	3.08627	FALSE	FALSE
NM_009658	1086	184	11677	Akr1b3	3.45851	2.94455	FALSE	FALSE
NM_019668	591	111	22209	Ube2a	3.19426	2.72506	FALSE	FALSE
NM_023355	21	7	56322	Timm22	1.7449	1.52483	FALSE	FALSE
NM_026143	199	54	67420	Far1	2.72153	2.41213	FALSE	FALSE
NM_025542	743	138	66404	Rtfdc1	3.29367	2.81961	FALSE	FALSE
NM_001252543	399	70	27054	Sec23b	3.02365	2.52483	FALSE	FALSE
NM_001038664	36	5	14710	Gngt2	1.97898	1.3787	FALSE	FALSE
NM_172769	167	60	235293	Sc5d	2.64539	2.45788	FALSE	FALSE
NM_027777	14	6	71382	Pex1	1.56881	1.45788	FALSE	FALSE
NM_146036	931	240	217737	Ahsa1	3.39163	3.05994	FALSE	FALSE
NM_001039511	17	1	117198	Ivns1abp	1.65313	1	FALSE	FALSE
NM_144791	1130	201	208263	Tor1aip1	3.47576	2.98293	FALSE	FALSE
NM_001170869	79	23	78428	Wibg	2.3203	2.04146	FALSE	FALSE
NM_009089	180	56	20020	Polr2a	2.67795	2.42792	FALSE	FALSE
NM_010421	2908	1225	15211	Hexa	3.88627	3.76787	FALSE	FALSE
NM_013499	712	191	12946	Cr1l	3.27516	2.96077	FALSE	FALSE
NM_001080748	98	23	14886	Gtf2i	2.4139	2.04146	FALSE	FALSE
NM_024215	67	17	68040	Zfp593	2.24875	1.91018	FALSE	FALSE
NM_001013366	51	28	101240	Wdr91	2.13025	2.12689	FALSE	FALSE
NM_133887	539	132	100226	Stx12	3.15427	2.80031	FALSE	FALSE
NM_001001295	22	9	213550	Dis3l	1.7651	1.63397	FALSE	FALSE
NM_001025617	62	33	76025	Cant1	2.21507	2.19825	FALSE	FALSE
NM_001024526	484	195	207214	Larp4	3.10752	2.96977	FALSE	FALSE
NM_001200023	12	6	620419	Zfp963	1.50186	1.45788	FALSE	FALSE
NM_024181	200	37	66861	Dnajc10	2.72371	2.24793	FALSE	FALSE
NM_144874	160	47	226139	Cox15	2.6268	2.35183	FALSE	FALSE
NM_177249	148	24	74996	Usp47	2.59294	2.05994	FALSE	FALSE
NM_001048227	23	8	52840	Dbndd2	1.7844	1.58282	FALSE	FALSE
NM_001080924	20	4	407821	Znrf3	1.72371	1.28179	FALSE	FALSE
NM_181279	154	39	107976	Bre	2.6102	2.2708	FALSE	FALSE
NM_001164147	16	4	21423	Tcf3	1.6268	1.28179	FALSE	FALSE
NM_024260	68	19	73288	Ccdc132	2.25519	1.95849	FALSE	FALSE
NM_133832	19	4	98711	Rdh10	1.70143	1.28179	FALSE	FALSE
NM_207207	77	24	99045	Mrps26	2.30917	2.05994	FALSE	FALSE
NM_008019	566	116	14225	Fkbp1a	3.17549	2.74419	FALSE	FALSE
NM_001199308_dup1	32	5	NA	NA	1.92783	1.3787	FALSE	FALSE
NM_021322	28	17	57773	Wdr4	1.86984	1.91018	FALSE	FALSE
NM_011530	505	92	21355	Tap2	3.12597	2.64352	FALSE	FALSE
NM_001172092	29	15	76131	Depdc1a	1.88508	1.85582	FALSE	FALSE
NM_009456	2134	241	22195	Ube2l3	3.75187	3.06175	FALSE	FALSE
NM_009229	24	14	20650	Sntb2	1.80289	1.82586	FALSE	FALSE
NM_027193	84	12	69740	Dph5	2.34696	1.75891	FALSE	FALSE
NM_133708	140	31	69080	Gmppa	2.56881	2.17109	FALSE	FALSE
NM_009096	6277	1310	20104	Rps6	4.22043	3.797	FALSE	FALSE
NM_001163836	15	12	67543	Pabpc6	1.59877	1.75891	FALSE	FALSE
NM_001081354	14	4	333639	Mamld1	1.56881	1.28179	FALSE	FALSE
NM_001256033	51	11	73945	Otud4	2.13025	1.72112	FALSE	FALSE
NM_031406	68	9	83704	Slc12a9	2.25519	1.63397	FALSE	FALSE
NM_001039151	10055	2151	12505	Cd44	4.42506	4.01237	FALSE	FALSE
NM_001122765	223	36	64383	Sirt2	2.77098	2.23603	FALSE	FALSE
NM_144801	17	6	70209	Tmem143	1.65313	1.45788	FALSE	FALSE
NM_177256	43	6	320769	Prdx6b	2.05615	1.45788	FALSE	FALSE
NM_021384	28748	2565	58185	Rsad2	4.88128	4.08882	FALSE	FALSE
NM_001101804_dup3	61	12	NA	NA	2.20801	1.75891	FALSE	FALSE
NM_181266	68	23	104348	Zfp120	2.25519	2.04146	FALSE	FALSE
NM_011552	204	34	21453	Tcof1	2.73231	2.21121	FALSE	FALSE
NM_133919	514	62	17355	Aff1	3.13364	2.47212	FALSE	FALSE
NM_019408	439	215	18034	Nfkb2	3.06514	3.01217	FALSE	FALSE
NM_001081259	78	15	226844	Mfsd7b	2.31477	1.85582	FALSE	FALSE
NM_207214	78	21	105504	Exoc5	2.31477	2.00195	FALSE	FALSE
NM_001177730	49	13	22259	Nr1h3	2.11287	1.79368	FALSE	FALSE
NM_016980	5931	1211	100503670	Rpl5	4.1958	3.76288	FALSE	FALSE
NM_009584	90	35	22791	Dnajc2	2.37692	2.2238	FALSE	FALSE
NM_001145779	72	42	16563	Kif2a	2.28001	2.30298	FALSE	FALSE
NM_021429	41	9	58240	Hs1bp3	2.03546	1.63397	FALSE	FALSE
NM_024471	108	23	79464	Lias	2.4561	2.04146	FALSE	FALSE
NM_025692	153	52	66663	Uba5	2.60737	2.39574	FALSE	FALSE
NM_001033236	25	3	207965	Vcpkmt	1.82062	1.15685	FALSE	FALSE
NM_001252316	160	37	108037	Shmt2	2.6268	2.24793	FALSE	FALSE
NM_001199020	18	14	52477	Angel2	1.67795	1.82586	FALSE	FALSE
NM_001164059	13	3	20343	Sell	1.53662	1.15685	FALSE	FALSE
NM_028017	162	27	108123	Napg	2.63219	2.1111	FALSE	FALSE
NM_001173550	3571	1021	12273	C5ar1	3.97547	3.68876	FALSE	FALSE
NM_001004191	14	0	434402	Gm5617	1.56881	1	FALSE	FALSE
NM_011721	25	11	22427	Wrn	1.82062	1.72112	FALSE	FALSE
NM_027764	36	12	71330	Rcbtb1	1.97898	1.75891	FALSE	FALSE
NM_146003	38	14	215351	Senp6	2.00246	1.82586	FALSE	FALSE
NM_001105667	123	23	21915	Dtymk	2.51258	2.04146	FALSE	FALSE
NM_001162938	1348	110	100033459	Pydc3	3.55237	2.72112	FALSE	FALSE
NM_001122992	35	11	56809	Gmeb1	1.96675	1.72112	FALSE	FALSE
NM_172585	423	122	217980	Larp4b	3.04902	2.76609	FALSE	FALSE
NM_029502	62	33	76025	Cant1	2.21507	2.19825	FALSE	FALSE
NM_026194	63	18	67490	Ufl1	2.22202	1.935	FALSE	FALSE
NM_011369	136	33	20419	Shcbp1	2.55622	2.19825	FALSE	FALSE
NM_026341	68	19	67725	Nudt13	2.25519	1.95849	FALSE	FALSE
NM_025362	65	22	66114	Dnajc30	2.23559	2.02215	FALSE	FALSE
NM_008907	17759	2415	268373	Ppia	4.6721	4.06265	FALSE	FALSE
NM_010726	208	42	16922	Phyh	2.74074	2.30298	FALSE	FALSE
NM_025432	109	18	66226	Trappc2	2.4601	1.935	FALSE	FALSE
NM_008446	57	23	16571	Kif4	2.17855	2.04146	FALSE	FALSE
NM_015800	12	5	50766	Crim1	1.50186	1.3787	FALSE	FALSE
NM_001008506	82	46	75553	Zc3h14	2.33649	2.34249	FALSE	FALSE
NM_011905	5273	1002	24088	Tlr2	4.14473	3.6806	FALSE	FALSE
NM_134125	146	35	106628	Trip10	2.58703	2.2238	FALSE	FALSE
NM_173018	16	1	270163	Myo9a	1.6268	1	FALSE	FALSE
NM_145925	351	57	108705	Pttg1ip	2.96798	2.43561	FALSE	FALSE
NM_009614	499	278	11490	Adam15	3.12078	3.12378	FALSE	FALSE
NM_001166501	55	17	329260	Dennd1b	2.16304	1.91018	FALSE	FALSE
NM_173450	15	5	271842	Rpusd2	1.59877	1.3787	FALSE	FALSE
NM_001205367	1763	387	235072	2016-09-07	3.66893	3.26744	FALSE	FALSE
NM_172967	36	4	269033	4930503L19Rik	1.97898	1.28179	FALSE	FALSE
NM_134091	21	3	105835	Sgsm3	1.7449	1.15685	FALSE	FALSE
NM_025995	23	25	67141	Fbxo5	1.7844	2.07767	FALSE	FALSE
NM_001163160	168	25	13026	Pcyt1a	2.64799	2.07767	FALSE	FALSE
NM_183167	59	18	233168	AI987944	2.19353	1.935	FALSE	FALSE
NM_027324	56	40	14057	Sfxn1	2.17087	2.28179	FALSE	FALSE
NM_011220	59	8	19286	Pts	2.19353	1.58282	FALSE	FALSE
NM_001199204	130	76	70834	Spag9	2.53662	2.56055	FALSE	FALSE
NM_029371	49	21	72459	Htatsf1	2.11287	2.00195	FALSE	FALSE
NM_001037997	78	22	14158	Fert2	2.31477	2.02215	FALSE	FALSE
NM_134150	631	86	107260	Otub1	3.22271	2.61423	FALSE	FALSE
NM_028242	49	21	72459	Htatsf1	2.11287	2.00195	FALSE	FALSE
NM_007616	327	76	12389	Cav1	2.93722	2.56055	FALSE	FALSE
NM_145468	19	7	27401	Skp2	1.70143	1.52483	FALSE	FALSE
NM_018757	16	4	54369	Nme6	1.6268	1.28179	FALSE	FALSE
NM_145950	71	45	209212	Osgin2	2.27394	2.33294	FALSE	FALSE
NM_011970	1164	178	26445	Psmb2	3.48863	2.93015	FALSE	FALSE
NM_010515	597	232	16004	Igf2r	3.19865	3.04522	FALSE	FALSE
NM_001163476	31	7	69270	Gins1	1.91404	1.52483	FALSE	FALSE
NM_053217	3632	218	112419	2010002M12Rik	3.98282	3.01819	FALSE	FALSE
NM_001099319	24	10	100039968	Gm12942	1.80289	1.67973	FALSE	FALSE
NM_170590	116	39	266692	Cpne1	2.48714	2.2708	FALSE	FALSE
NM_001081633	90	20	27886	Dgcr14	2.37692	1.98076	FALSE	FALSE
NM_011673	160	84	22234	Ugcg	2.6268	2.60401	FALSE	FALSE
NM_008521	67	9	17001	Ltc4s	2.24875	1.63397	FALSE	FALSE
NM_001037759	349	89	170755	Sgk3	2.9655	2.62912	FALSE	FALSE
NM_001110193	335	128	16331	Inpp5d	2.94772	2.78694	FALSE	FALSE
NM_001037922	22	9	624855	Cks1brt	1.7651	1.63397	FALSE	FALSE
NM_001198913	160	62	16800	Arhgef2	2.6268	2.47212	FALSE	FALSE
NM_001163542	503	227	18810	Plec	3.12425	3.03576	FALSE	FALSE
NM_023409	7363	915	67963	Npc2	4.28973	3.64115	FALSE	FALSE
NM_010560	78	25	16195	Il6st	2.31477	2.07767	FALSE	FALSE
NM_153153	21	4	225115	Svil	1.7449	1.28179	FALSE	FALSE
NM_198619	20	11	242747	Zfp933	1.72371	1.72112	FALSE	FALSE
NM_001130151	241	97	16801	Arhgef1	2.80469	2.6665	FALSE	FALSE
NM_001253863	157	54	21406	Tcf12	2.61858	2.41213	FALSE	FALSE
NM_009786	580	142	12301	Cacybp	3.18611	2.83202	FALSE	FALSE
NM_030715	39	32	80905	Polh	2.01374	2.18488	FALSE	FALSE
NM_021498	94	15	59001	Pole3	2.3958	1.85582	FALSE	FALSE
NM_025641	338	54	66576	Uqcrh	2.95159	2.41213	FALSE	FALSE
NM_001172148	49	7	237073	Rbm41	2.11287	1.52483	FALSE	FALSE
NM_133933	1072	360	103963	Rpn1	3.45287	3.23603	FALSE	FALSE
NM_022309	273	77	12400	Cbfb	2.85884	2.56622	FALSE	FALSE
NM_009412	840	105	21985	Tpd52	3.34696	2.70092	FALSE	FALSE
NM_008020	271	60	14227	Fkbp2	2.85565	2.45788	FALSE	FALSE
NM_001113383	244	113	14660	Gls	2.81007	2.73281	FALSE	FALSE
NM_172725	26	10	231855	Ap5z1	1.83765	1.67973	FALSE	FALSE
NM_138679	52	9	192195	Ash1l	2.13868	1.63397	FALSE	FALSE
NM_029609	69	8	76429	Lhpp	2.26153	1.58282	FALSE	FALSE
NM_001081417	15	2	320790	Chd7	1.59877	1	FALSE	FALSE
NM_009298	73	33	20935	Surf6	2.286	2.19825	FALSE	FALSE
NM_001270495	43	10	100039257	Tmem254b	2.05615	1.67973	FALSE	FALSE
NM_001013256	15	5	68964	Ctc1	1.59877	1.3787	FALSE	FALSE
NM_133757	146	78	74451	Pgs1	2.58703	2.57183	FALSE	FALSE
NM_028071	2182	314	72042	Cotl1	3.76153	3.17666	FALSE	FALSE
NM_001113527	461	34	57444	Isg20	3.08638	2.21121	FALSE	FALSE
NM_029775	177	68	76863	Dcun1d5	2.67065	2.51224	FALSE	FALSE
NM_021876	226	69	13626	Eed	2.77679	2.51858	FALSE	FALSE
NM_026006	16	1	67158	Sft2d3	1.6268	1	FALSE	FALSE
NM_001193303	930	183	110829	Lims1	3.39116	2.94218	FALSE	FALSE
NM_001098837	16	7	217218	Atxn7l3	1.6268	1.52483	FALSE	FALSE
NM_181424	17	4	52856	Mtg2	1.65313	1.28179	FALSE	FALSE
NM_001079876	153	32	237436	Gas2l3	2.60737	2.18488	FALSE	FALSE
NM_028291	28	15	72587	Pan3	1.86984	1.85582	FALSE	FALSE
NM_007645	885	219	12493	Cd37	3.36962	3.02018	FALSE	FALSE
NM_027799	107	60	71452	Ankrd40	2.45206	2.45788	FALSE	FALSE
NM_145437	176	35	217305	Cd300ld	2.66819	2.2238	FALSE	FALSE
NM_026521	179	57	68036	Zfp706	2.67553	2.43561	FALSE	FALSE
NM_008204	286	72	14990	H2-M2	2.87904	2.53706	FALSE	FALSE
NM_153197	124	20	73149	Clec4a3	2.5161	1.98076	FALSE	FALSE
NM_001085493	33	12	76947	Ndufaf6	1.94119	1.75891	FALSE	FALSE
NM_001161823	145	36	230674	Kdm4a	2.58405	2.23603	FALSE	FALSE
NM_001025262	861	117	21985	Tpd52	3.35768	2.74792	FALSE	FALSE
NM_001163425	201	24	66915	Myeov2	2.72587	2.05994	FALSE	FALSE
NM_001168240	12	2	65099	Irak1bp1	1.50186	1	FALSE	FALSE
NM_153056	123	32	209011	Sirt7	2.51258	2.18488	FALSE	FALSE
NM_001164226	93	19	18181	Nrf1	2.39116	1.95849	FALSE	FALSE
NM_011602	923	318	21894	Tln1	3.38788	3.18216	FALSE	FALSE
NM_133869	758	144	99712	Cept1	3.30235	2.83809	FALSE	FALSE
NM_001024849	56	11	329575	Gm14325	2.17087	1.72112	FALSE	FALSE
NM_007630	198	107	12442	Ccnb2	2.71934	2.70912	FALSE	FALSE
NM_001163591	133	17	74732	Stx11	2.54653	1.91018	FALSE	FALSE
NM_001017968	45	33	503610	Zdhhc18	2.07589	2.19825	FALSE	FALSE
NM_001166480	975	178	20832	Ssr4	3.41168	2.93015	FALSE	FALSE
NM_001163300	183	43	224903	Safb	2.68513	2.3132	FALSE	FALSE
NM_010227	1717	601	192176	Flna	3.65745	3.45861	FALSE	FALSE
NM_011488	103	43	20850	Stat5a	2.43551	2.3132	FALSE	FALSE
NM_001163018	129	65	52615	Suz12	2.53327	2.49265	FALSE	FALSE
NM_144896	35	6	229487	Gatb	1.96675	1.45788	FALSE	FALSE
NM_153489	537	116	74383	Ubap2l	3.15265	2.74419	FALSE	FALSE
NM_001163450	19	3	30957	Mapk8ip3	1.70143	1.15685	FALSE	FALSE
NM_019736	379	85	56360	Acot9	3.00132	2.60915	FALSE	FALSE
NM_001077360	105	43	26431	Git2	2.44387	2.3132	FALSE	FALSE
NM_001177626	61	8	13605	Ect2	2.20801	1.58282	FALSE	FALSE
NM_001029855	2891	456	19188	Psme2	3.88373	3.3387	FALSE	FALSE
NM_007454	279	65	11764	Ap1b1	2.86828	2.49265	FALSE	FALSE
NM_016676	1165	283	19325	Rab10	3.489	3.13152	FALSE	FALSE
NM_028127	43	9	319710	Frmd6	2.05615	1.63397	FALSE	FALSE
NM_145158	220	121	246707	Emilin2	2.7651	2.76252	FALSE	FALSE
NM_023294	124	56	67052	Ndc80	2.5161	2.42792	FALSE	FALSE
NM_025748	43	5	66757	Adat2	2.05615	1.3787	FALSE	FALSE
NM_023423	525	148	68050	Akirin1	3.14284	2.84999	FALSE	FALSE
NM_175034	53	6	317750	Slc24a5	2.14695	1.45788	FALSE	FALSE
NM_173047	32	6	109857	Cbr3	1.92783	1.45788	FALSE	FALSE
NM_027236	29	11	69860	Eif1ad	1.88508	1.72112	FALSE	FALSE
NM_145994	1097	188	11308	Abi1	3.46288	2.95389	FALSE	FALSE
NM_028475	532	118	74383	Ubap2l	3.14859	2.75161	FALSE	FALSE
NM_001136496	18	12	71508	Zfp935	1.67795	1.75891	FALSE	FALSE
NM_009579	235	28	22782	Slc30a1	2.79374	2.12689	FALSE	FALSE
NM_016742	880	171	12539	Cdc37	3.36716	2.91273	FALSE	FALSE
NM_011343	1358	840	20335	Sec61g	3.55558	3.60401	FALSE	FALSE
NM_001085408	36	21	68112	Sdccag3	1.97898	2.00195	FALSE	FALSE
NM_001146222	138	19	66310	Dpy30	2.56256	1.95849	FALSE	FALSE
NM_001080388	141	42	13728	Mark2	2.5719	2.30298	FALSE	FALSE
NM_010191	48	21	14137	Fdft1	2.10392	2.00195	FALSE	FALSE
NM_023647	166	33	93790	Nipa2	2.64279	2.19825	FALSE	FALSE
[truncated: 11,772 more rows]
